# Supplementary material for: Catalytic hydrogenation of α,β-unsaturated carboxylic acid derivatives using copper( i )/N-heterocyclic carbene complexes
Source: Royal Society of Chemistry journal article supplement (doi:10.1039/c8cc09853k), 2019-01-01

## Contents

|                                                                                                                                            |    |
|--------------------------------------------------------------------------------------------------------------------------------------------|----|
| 1 General Information .....                                                                                                                | 2  |
| 1.1 Solvents.....                                                                                                                          | 3  |
| 1.2 Reactions under H <sub>2</sub> pressure .....                                                                                          | 3  |
| 1.3 Chemicals.....                                                                                                                         | 3  |
| 2 Additional optimization data.....                                                                                                        | 4  |
| 2.1 Influence of catalyst, base, solvent, pressure and temperature .....                                                                   | 4  |
| 3 General procedures .....                                                                                                                 | 8  |
| 3.1 General procedure 1 – synthesis of $\alpha,\beta$ -unsaturated esters <b>8</b> <i>via</i> Horner-Wadsworth-Emmons reaction (GP1) ..... | 8  |
| 3.2 General procedure 2 – H <sub>2</sub> -mediated conjugate reduction (GP2).....                                                          | 8  |
| 4 Experimental Details .....                                                                                                               | 9  |
| 4.1 Syntheses of $\alpha,\beta$ -unsaturated esters and amides .....                                                                       | 9  |
| 4.2 Syntheses of alkyl phosphonates.....                                                                                                   | 20 |
| 4.3 Synthesis of [SiMesCuCl] <b>6</b> .....                                                                                                | 21 |
| 4.4 Conjugate reduction products .....                                                                                                     | 23 |
| 4.5 Additives tested in the conjugate reduction .....                                                                                      | 65 |
| 4.5.1 Analytical data for the additives tested:.....                                                                                       | 66 |
| 4.6 Deuteration experiments.....                                                                                                           | 78 |
| 4.7 Competition with alkyne semihydrogenation .....                                                                                        | 82 |
| 4.8 Circumstantial evidence for possible recycling and re-isolation of the catalyst [SiMesCuCl] ( <b>6</b> ).....                          | 88 |
| 5 Asymmetric conjugate reduction of $\alpha,\beta$ -unsaturated esters .....                                                               | 90 |
| 5.1 General procedure 3 – asymmetric conjugate reduction (GP3) .....                                                                       | 90 |
| 6 References .....                                                                                                                         | 97 |
| 7 Spectra.....                                                                                                                             | 99 |

## 1 General Information

All reactions were carried out in flame dried glassware under a nitrogen atmosphere using standard Schlenk techniques. Glassware and stir bars contaminated with transition metals were treated with *aqua regia* (conc. HCl/conc. HNO<sub>3</sub> 3:1) prior to cleaning. For cleaning, glassware and stir bars were kept in a *iso*-PrOH/KOH bath overnight, rinsed with H<sub>2</sub>O, kept in a citric acid/H<sub>2</sub>O bath overnight and finally rinsed with deionized H<sub>2</sub>O and dried at 120 °C. Solutions and reagents were added with nitrogen-flushed disposable syringes/needles. Solvents were added using glass syringes and stainless steel needles (stored at 120 °C). Analytical thin layer chromatography (TLC) was performed on silica gel 60 G/UV<sub>254</sub> aluminium sheets (*Macherey-Nagel*). Flash column chromatography was performed on silica gel Davisil LC60A (40-63 μm, pore size 60 Å, *Grace*) using the indicated solvents. NMR spectra were recorded on AV400, AV500 or AV700 instruments (*Bruker*) at the Institut für Chemie of *Technische Universität Berlin*. Chemical shifts are reported in parts per million (ppm) and are referenced to the residual solvent resonance as the internal standard according to the standard literature.<sup>[1]</sup> Data are reported as follows: chemical shift, multiplicity (br s = broad singlet, s = singlet, d = doublet, t = triplet, q = quartet, m = multiplet, m<sub>c</sub> = centrosymmetric multiplet), coupling constants (Hz), integration and – if possible – atom assignment. The assignment refers to the atom number shown in the corresponding molecule figure and was achieved by analysis of DEPT (DEPT 135) and 2D-NMR spectra (COSY, HMQC, HSQC, HMBC, NOESY). If a distinct assignment was not possible, atoms were marked with “\*” and are interchangeable. Designation “Ar” refers to atoms of an aromatic system where a distinct assignment was not possible. Melting points (m.p.) were determined using a Leica Galen III melting point apparatus (*Wagner & Munz*). Infrared (IR) spectra were recorded on a Cary 630 FT-IR spectrometer equipped with an ATR unit (*Agilent Technologies*). Mass spectra (HRMS) were obtained from the Analytical Facility at the Institut für Chemie at *Technische Universität Berlin* (ESI/APCI: LTQ Orbitrap XL, *Thermo Scientific*; EI: GC-system 5975C, HP-5MS, *Agilent Technologies*). Analytical gas chromatography (GC) of reaction mixtures and pure substances was performed using a gas chromatograph 430-GC (*Varian Inc.*). The instrument was equipped with a FactorFour VF-WAXms capillary column (*Varian Inc.*, length: 30 m, inner diameter: 0.25 mm, film thickness of the stationary phase: 0.25 μm). The following temperature program was used for the analysis: carrier gas N<sub>2</sub>; injection temperature 270 °C; detector temperature 270 °C; flow rate 4.0 mL/min; temperature program: 40 °C start temperature, 20 °C/min heating rate to 250 °C for 10 min, then 20 °C/min heating rate to final temperature 260 °C for 5 min. The data was recorded with the program Galaxie 1.9.302.952 (*Varian Inc.*). Enantiomeric excesses were determined by analytical high performance liquid chromatography (HPLC) analysis on an

Agilent Technologies 1290 Infinity instrument with a chiral stationary phase using a Daicel Chiralcel OD-H column (*n*-heptane/iso-propanol = 98:2, 0.5 mL/min, 20 °C, 30 bar).

### 1.1 Solvents

THF and 1,4-dioxane were dried over sodium/benzophenone and distilled under N<sub>2</sub> atmosphere prior to use. Et<sub>3</sub>N and CH<sub>2</sub>Cl<sub>2</sub> were dried over CaH<sub>2</sub> and distilled under N<sub>2</sub> atmosphere prior to use. Acetone and EtOH were distilled under reduced pressure prior to use. Solvents (technical grade) for extraction/chromatography (*n*-pentane, cyclohexane, CH<sub>2</sub>Cl<sub>2</sub>, *tert*-butyl methyl ether, EtOAc) were distilled under reduced pressure prior to use. Liquid substrates for hydrogenation reactions were degassed prior to use.

### 1.2 Reactions under H<sub>2</sub> pressure

All reactions under H<sub>2</sub> pressure were carried out in glass vials (50 x 14 mm, *Schütt*), equipped with a magnetic stir bar and a rubber septum in autoclaves BR-100 or Br-300 (including the appropriate heating blocks, *Berghof*). The autoclave was purged with N<sub>2</sub> (3 x 10 bar) before the vials were placed in the autoclave and the septum was pierced under a counter flow of N<sub>2</sub>. The autoclave was purged with N<sub>2</sub> (1 x 1 bar, 3 x 10 bar) and H<sub>2</sub> (3 x 10 bar) or D<sub>2</sub> (2 x 5 bar) before the appropriate H<sub>2</sub> or D<sub>2</sub> pressure was applied (pressure is given as initial pressure before heating). The heating block was pre-heated before the autoclave was placed inside. After the respective reaction time the autoclave was allowed to cool to rt and H<sub>2</sub> or D<sub>2</sub> was released. The autoclave was purged with N<sub>2</sub> (3 x 10 bar) before the vials were taken out.

### 1.3 Chemicals

All reagents were purchased from established commercial suppliers (*Sigma-Aldrich*, *Alfa Aesar*, *TCl*, *Acros*, *Strem*, *Merck*, *ABCR*, *Fluka*, *Fisher Scientific*) and used without further purification. H<sub>2</sub> (99.999%) and D<sub>2</sub> (99.8%) was purchased from *Air Liquide*. (1*E*,2*E*)-*N*<sup>1</sup>,*N*<sup>2</sup>-dimesitylethane-1,2-diimine,<sup>[2]</sup> diethyl 3,3'-(1,4-phenylene)(2*E*,2'*E*)-bis(but-2-enoate) (**8r**),<sup>[3]</sup> ethyl (*E*)-2-methyl-3-phenylbut-2-enoate (**8l**),<sup>[4]</sup> ethyl 3-propylhex-2-enoate (**8v**),<sup>[3]</sup> ethyl (2*E*,4*E*)-5-phenylpenta-2,4-dienoate (**12**)<sup>[5]</sup>, ethyl (*E*)-3-(4-(dimethylamino)phenyl)but-2-enoate (**8n**),<sup>[6]</sup> 1-(4-((*tert*-butyldiphenylsilyl)oxy)phenyl)ethan-1-one<sup>[7]</sup> and (*E*)-3-phenylbut-2-enoic acid<sup>[8]</sup> were synthesized following known procedures.

## 2 Additional optimization data

### 2.1 Influence of catalyst, base, solvent, pressure and temperature

Table S1: Influence of Cu-catalyst.<sup>a</sup>

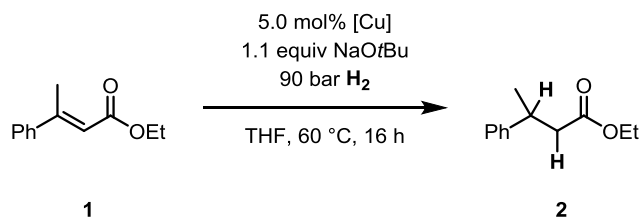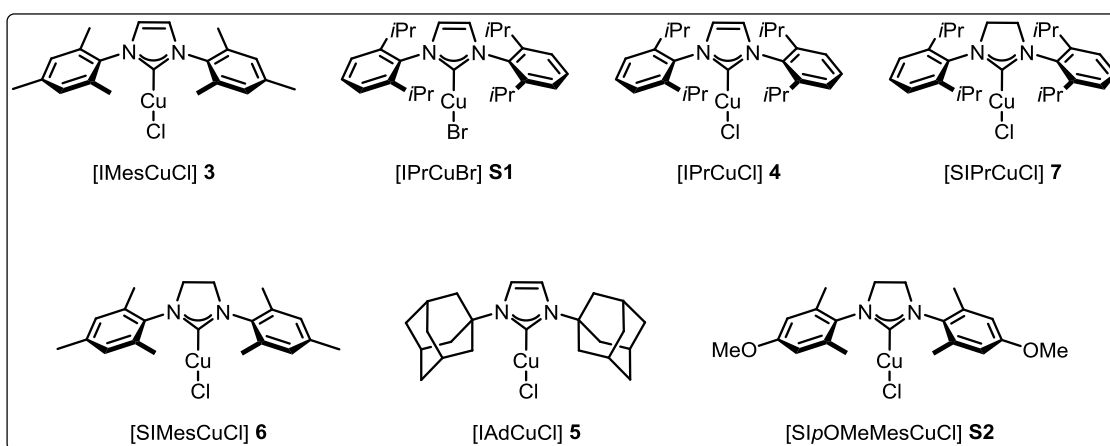

| Entry | [Cu]               | Conv. <sup>b</sup> [%] |
|-------|--------------------|------------------------|
| 1     | [IMesCuCl] 3       | >95                    |
| 2     | [IPrCuBr] S1       | 67                     |
| 3     | [IPrCuCl] 4        | 94                     |
| 4     | [SIPrCuCl] 7       | 41                     |
| 5     | [SIMesCuCl] 6      | >95                    |
| 6     | [IAdCuCl] 5        | 17                     |
| 7     | [SIpOMeMesCuCl] S2 | >95                    |

<sup>a</sup> All reactions with 4.6 μmol [Cu] in 1.1 mL solvent. <sup>b</sup> Determined by <sup>1</sup>H NMR spectroscopy.



**Table S2:** Influence of base.<sup>a</sup>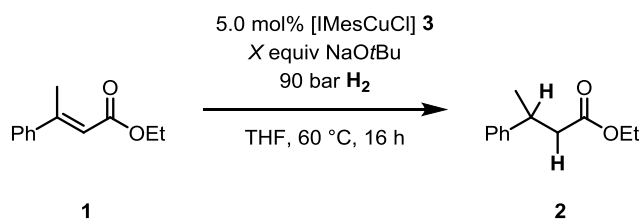

| Entry | Conditions                                 | Conv. <sup>b</sup> [%] |
|-------|--------------------------------------------|------------------------|
| 1     | no [IMesCuCl] <b>3</b><br>1.1 equiv NaOtBu | 0                      |
| 2     | no NaOtBu                                  | 0                      |
| 3     | no [IMesCuCl] <b>3</b><br>no NaOtBu        | 0                      |
| 4     | 10 mol% NaOtBu                             | 6                      |
| 5     | 30 mol% NaOtBu                             | >95                    |
| 6     | 50 mol% NaOtBu                             | >95                    |
| 7     | 80 mol% NaOtBu                             | >95                    |

<sup>a</sup> All reactions with 4.6 μmol [Cu] in 1.1 mL solvent. <sup>b</sup> Determined by <sup>1</sup>H NMR spectroscopy.

**Table S3:** Influence of solvent.<sup>a</sup>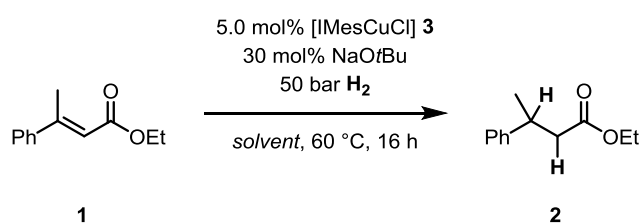

| Entry | solvent     | Conv. <sup>b</sup> [%] |
|-------|-------------|------------------------|
| 1     | THF         | 32                     |
| 2     | 1,4-dioxane | >95                    |
| 3     | 2-Me-THF    | 8                      |
| 4     | DMF         | 0                      |
| 5     | MeCN        | 6                      |
| 6     | cyclohexane | 27                     |

| Entry | solvent             | Conv. <sup>b</sup> [%] |
|-------|---------------------|------------------------|
| 7     | <i>n</i> -hexane    | 27                     |
| 8     | benzene             | 18                     |
| 9     | chlorobenzene       | 5                      |
| 10    | 1,2-dichlorobenzene | 16                     |
| 11    | toluene             | 44                     |

<sup>a</sup> All reactions with 4.6 μmol [Cu] in 1.1 mL solvent. <sup>b</sup> Determined by <sup>1</sup>H NMR spectroscopy.

**Table S4:** Influence of H<sub>2</sub>-pressure and temperature.<sup>a</sup>

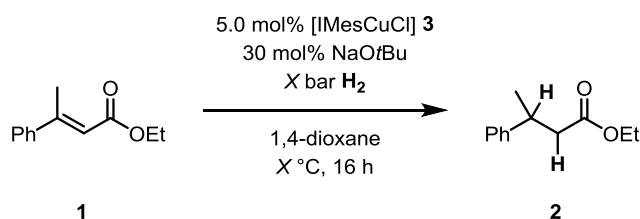

| Entry | H <sub>2</sub> pressure<br>[bar] | Temperature<br>[°C] | Conv. <sup>b</sup> [%] |
|-------|----------------------------------|---------------------|------------------------|
| 1     | 50                               | 60                  | >95                    |
| 2     | 10                               | 60                  | 5                      |
| 3     | 10                               | 100                 | >95                    |
| 4     | 1 <sup>c</sup>                   | 100                 | 0                      |
| 5     | 1 <sup>c</sup>                   | 120                 | 0                      |
| 6     | 5                                | 120                 | 0                      |

<sup>a</sup> All reactions with 5.5 μmol [Cu] in 1 mL solvent. <sup>b</sup> Determined by <sup>1</sup>H NMR spectroscopy. <sup>c</sup> Reaction was performed in an H<sub>2</sub>-purged pressure tube.

**Table S5:** Performance of Cu catalysts at low H<sub>2</sub> pressure.<sup>a</sup>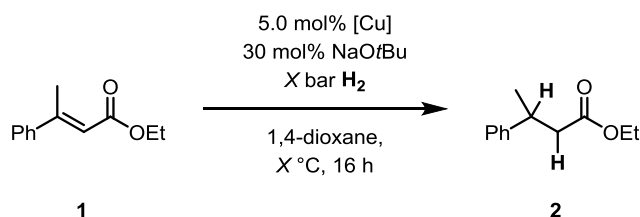

| Entry | [Cu]                      | H <sub>2</sub> pressure<br>[bar] | Temperature<br>[°C] | Conv. <sup>b</sup> [%] |
|-------|---------------------------|----------------------------------|---------------------|------------------------|
| 1     | [IMesCuCl] <b>3</b>       | 10                               | 60                  | 5                      |
| 2     | [SIpOMeMesCuCl] <b>S2</b> | 10                               | 60                  | 10                     |
| 3     | [SIMesCuCl] <b>6</b>      | 10                               | 60                  | 79                     |
| 4     | [SIMesCuCl] <b>6</b>      | 1 <sup>c</sup>                   | 100                 | 32                     |
| 5     | [SIMesCuCl] <b>6</b>      | 10                               | 100                 | >95 (71%) <sup>d</sup> |

<sup>a</sup> All reactions with 5.5 μmol [Cu] in 1 mL solvent. <sup>b</sup> Determined by <sup>1</sup>H NMR spectroscopy. <sup>c</sup> Reaction was performed in an H<sub>2</sub>-purged pressure tube. <sup>d</sup> Isolated yield.

**Table S6:** Investigation of *E*- and *Z*-enoates.<sup>a</sup>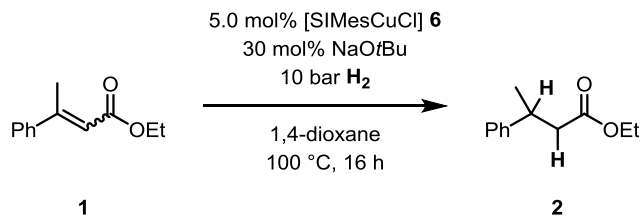

| Entry | Enoate      | Conv. <sup>b</sup> [%] |
|-------|-------------|------------------------|
| 1     | <i>E</i> -1 | >99                    |
| 2     | <i>Z</i> -1 | >99                    |

<sup>a</sup> All reactions with 5.5 μmol [Cu] in 1 mL solvent. <sup>b</sup> Determined by GC analysis

### 3 General procedures

#### 3.1 General procedure 1 – synthesis of $\alpha,\beta$ -unsaturated esters **8** via Horner-Wadsworth-Emmons reaction (GP1)

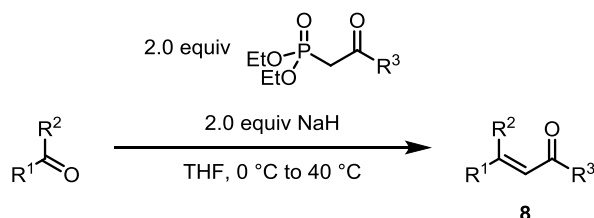

According to a literature procedure<sup>[3]</sup> NaH (60 wt% in mineral oil, 2.00 equiv) is suspended in THF (0.5M) and cooled to 0 °C. The corresponding phosphonate (2.00 equiv) is added dropwise and the reaction mixture is stirred at 0 °C for 30 min. The corresponding ketone (1.00 equiv) is added (neat for liquids, in solution in THF for solids 0.1 mL/mmol). The cooling bath is removed and the mixture is stirred at 40 °C until full conversion was detected (conversion monitored *via* TLC). After quenching the reaction by addition of H<sub>2</sub>O (2 mL/mmol ketone) the aqueous phase is extracted with *tert*-butyl methyl ether (3 x 3 mL/mmol) and the combined organic layers are dried over Na<sub>2</sub>SO<sub>4</sub> and filtered. All volatiles are removed under reduced pressure and the obtained crude product **8** is purified by flash column chromatography on silica gel.

#### 3.2 General procedure 2 – H<sub>2</sub>-mediated conjugate reduction (GP2)

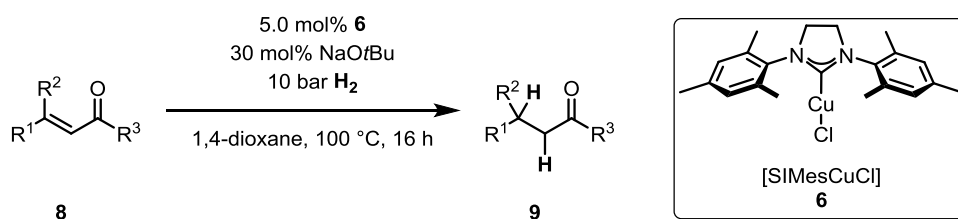

In a 5 mL glass vial equipped with a septum, [SMeCuCl] (**6**, 5.1 mg, 13  $\mu$ mol, 5.0 mol%) is placed and the vial is transferred into a N<sub>2</sub>-filled glovebox. NaOtBu (7.2 mg, 75  $\mu$ mol, 30 mol%) is added and the solids are dissolved in 1,4-dioxane (1 mL). The mixture is stirred for 5 min at 40 °C. The degassed  $\alpha,\beta$ -unsaturated ester **8** (0.25 mmol, 1.0 equiv) is dissolved in 1,4-dioxane (0.5 mL) and transferred to the reaction vial. The vial is placed in an autoclave and the septum is pierced with a needle under N<sub>2</sub>-counterflow. The autoclave is purged with H<sub>2</sub> (3 x 10 bar). The reaction mixture is stirred for 16 h at 100 °C under H<sub>2</sub>-atmosphere (10 bar). The crude reaction mixture is filtered over a small plug silica (eluant: CH<sub>2</sub>Cl<sub>2</sub>,

0.5 x 3 cm, 10 mL) and all volatiles are removed under reduced pressure. The crude product **9** is purified by flash column chromatography on silica gel.

## 4 Experimental Details

### 4.1 Syntheses of $\alpha,\beta$ -unsaturated esters and amides

#### 4.1.1 Ethyl (*E*)-3-phenylbut-2-enoate (**1**)

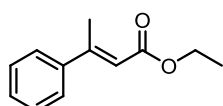

**1**  
C<sub>12</sub>H<sub>14</sub>O<sub>2</sub>  
Mw = 190.24

Prepared according to **GP1** from acetophenone (2.3 mL, 20.0 mmol, 1.00 equiv), NaH (60 wt% in mineral oil, 1.60 g, 40.0 mmol, 2.00 equiv) and triethyl phosphonoacetate (7.9 mL, 40 mmol, 2.0 equiv) in THF (40 mL). The reaction mixture was stirred for 48 h at 40 °C. Purification by

flash column chromatography on silica gel (cyclohexane/*tert*-butyl methyl ether = 100:1) yielded **1** as a colorless oil (2.59 g, 13.6 mmol, 68%).

$R_f$  = 0.35 (SiO<sub>2</sub>, cyclohexane/*tert*-butyl methyl ether = 9:1).

<sup>1</sup>H NMR (500 MHz, CDCl<sub>3</sub>):  $\delta$  = 1.32 (t,  $J$  = 7.1 Hz, 3H), 2.58 (d,  $J$  = 1.4 Hz, 3H), 4.22 (q,  $J$  = 7.1 Hz, 2H), 6.13 (q,  $J$  = 1.3 Hz, 1H), 7.33–7.39 (m, 3H), 7.45–7.50 (m, 2H) ppm.

<sup>13</sup>C NMR (126 MHz, CDCl<sub>3</sub>):  $\delta$  = 14.4, 18.0, 59.9, 117.3, 126.4, 128.6, 129.0, 142.3, 155.5, 166.9 ppm.

**HRMS** (APCI) for C<sub>12</sub>H<sub>15</sub>O<sub>2</sub><sup>+</sup> [(M+H)<sup>+</sup>] calculated: 191.1067, found: 191.1070.

The data is in accordance with literature.<sup>[9]</sup>

#### 4.1.2 Ethyl (*E*)-3-(naphthalen-2-yl)but-2-enoate (**8a**)

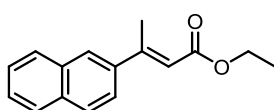

**8a**  
C<sub>16</sub>H<sub>16</sub>O<sub>2</sub>  
Mw = 240.30

Prepared according to **GP1** from 2-acetonaphthone (5.11 g, 30.0 mmol, 1.00 equiv), NaH (60 wt% in mineral oil, 2.40 g, 60.0 mmol, 2.00 equiv) and triethyl phosphonoacetate (11.9 mL, 60.0 mmol, 2.00 equiv) in THF (60 mL). The reaction mixture was

stirred for 48 h at 40 °C. Purification by flash column chromatography on silica gel (cyclohexane/*tert*-butyl methyl ether = 100:1) yielded **8a** as a colorless oil (4.93 g, 20.5 mmol, 68%).

$R_f$  = 0.59 (SiO<sub>2</sub>, cyclohexane/*tert*-butyl methyl ether = 4:1).

<sup>1</sup>H NMR (500 MHz, CDCl<sub>3</sub>):  $\delta$  = 1.35 (m<sub>c</sub>, 3H), 2.70 (m, 3H), 4.26 (m<sub>c</sub>, 2H), 6.29–6.31 (m, 1H), 7.50 (m<sub>c</sub>, 2H), 7.60 (dd,  $J$  = 8.6 Hz,  $J$  = 1.9 Hz, 1H), 7.81–7.88 (m, 3H), 7.95 (d,  $J$  = 1.7 Hz, 1H) ppm.

<sup>13</sup>C NMR (126 MHz, CDCl<sub>3</sub>): δ = 14.5, 18.0, 60.0, 117.6, 124.0, 126.0, 126.6, 126.8, 127.7, 128.2, 128.6, 133.2, 133.6, 139.5, 155.3, 167.0 ppm.

HRMS (APCI) for C<sub>16</sub>H<sub>17</sub>O<sub>2</sub><sup>+</sup> [(M+H)<sup>+</sup>] calculated: 241.1223, found: 241.1228.

The data is in accordance with literature.<sup>[10]</sup>

#### 4.1.3 *tert*-Butyl (*E*)-3-phenylbut-2-enoate (**8b**)

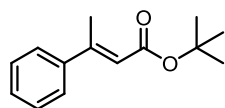

**8b**  
C<sub>14</sub>H<sub>18</sub>O<sub>2</sub>  
Mw = 218.30

Prepared according to **GP1** from acetophenone (2.1 mL, 18.6 mmol, 1.0 equiv), NaH (60 wt% in mineral oil, 1.48 g, 37.1 mmol, 2.00 equiv) and *tert*-butyl 2-(diethoxyphosphoryl)acetate (**S4**, 9.36 g, 37.1 mmol, 2.0 equiv) in THF (35 mL). The reaction mixture was stirred for 7 h at 40 °C. Purification by flash column chromatography on silica gel (cyclohexane/*tert*-butyl methyl ether = 20:1) yielded **8b** as a colorless oil (2.10 g, 9.76 mmol, 65%).

R<sub>f</sub> = 0.80 (SiO<sub>2</sub>, cyclohexane/*tert*-butyl methyl ether = 9:1).

<sup>1</sup>H NMR (500 MHz, CDCl<sub>3</sub>): δ = 1.52 (s, 9H), 2.53 (d, *J* = 1.3 Hz, 3H), 6.05 (q, *J* = 1.3 Hz, 1H), 7.31–7.37 (m, 3H), 7.43–7.48 (m, 2H) ppm.

<sup>13</sup>C NMR (126 MHz, CDCl<sub>3</sub>): δ = 17.9, 28.4, 80.1, 119.2, 126.4, 128.5, 128.8, 142.7, 154.1, 166.5 ppm.

HRMS (APCI) for C<sub>14</sub>H<sub>19</sub>O<sub>2</sub><sup>+</sup> [(M+H)<sup>+</sup>] calculated: 219.1380, found: 219.1375.

IR (ATR):  $\tilde{\nu}$  = 2975 (w), 1703 (s), 1625 (s), 1445 (m), 1365 (m), 1273 (m), 1203 (w), 1138 (s), 1011 (m), 915 (w), 871 (m), 758 (m), 692 (s) cm<sup>-1</sup>.

#### 4.1.4 Ethyl 3,3-diphenylacrylate (**8c**)

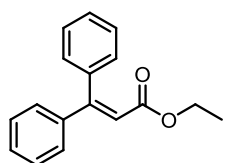

**8c**  
C<sub>17</sub>H<sub>16</sub>O<sub>2</sub>  
Mw = 252.31

Prepared according to **GP1** from benzophenone (3.64 g, 20.0 mmol, 1.00 equiv), NaH (60 wt% in mineral oil, 1.60 g, 40.0 mmol, 2.00 equiv) and triethyl phosphonoacetate (7.9 mL, 40 mmol, 2.0 equiv) in THF (40 mL). The reaction mixture was stirred for 48 h at 40 °C. Purification by flash column chromatography on silica gel (cyclohexane/*tert*-butyl methyl ether = 50:1) yielded **8c** as a colorless oil (2.87 g, 11.4 mmol, 57%).

R<sub>f</sub> = 0.46 (SiO<sub>2</sub>, cyclohexane/*tert*-butyl methyl ether = 9:1).

<sup>1</sup>H NMR (500 MHz, CDCl<sub>3</sub>): δ = 1.11 (t, *J* = 7.1 Hz, 3H), 4.05 (q, *J* = 7.1 Hz, 2H), 6.37 (s, 1H), 7.19–7.24 (m, 2H), 7.28–7.42 (m, 8H) ppm.

<sup>13</sup>C NMR (126 MHz, CDCl<sub>3</sub>): δ = 14.1, 60.1, 117.6, 127.9, 128.2, 128.4, 128.4, 129.2, 129.4, 139.1, 140.9, 156.5, 166.2 ppm.

**HRMS** (APCI) for  $C_{17}H_{17}O_2^+$  [(M+H)<sup>+</sup>] calculated: 253.1223, found: 253.1217.

The data is in accordance with literature.<sup>[3]</sup>

#### 4.1.5 Ethyl (*E*)-3-(4-methoxyphenyl)but-2-enoate (**8d**)

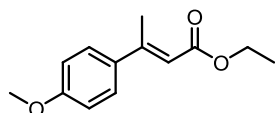

**8d**  
 $C_{13}H_{16}O_3$   
Mw = 220.27

Prepared according to **GP1** from 4-methoxy acetophenone (3.00 g, 20.0 mmol, 1.00 equiv), NaH (60 wt% in mineral oil, 1.60 g, 40.0 mmol, 2.00 equiv) and triethyl phosphonoacetate (7.9 mL, 40 mmol, 2.0 equiv) in THF (40 mL). The reaction mixture was stirred for 48 h at 40 °C. Purification by flash column chromatography on silica gel (cyclohexane/*tert*-butyl methyl ether = 50:1) yielded **8d** as a yellow oil (2.87 g, 13.0 mmol, 65%).

$R_f$  = 0.36 (SiO<sub>2</sub>, cyclohexane/*tert*-butyl methyl ether = 9:1).

<sup>1</sup>H NMR (500 MHz, CDCl<sub>3</sub>): δ = 1.31 (t, *J* = 7.2 Hz, 3H), 2.56 (d, *J* = 1.3 Hz, 3H), 3.83 (s, 3H), 4.21 (q, *J* = 7.1 Hz, 2H), 6.11 (q, *J* = 1.3 Hz, 1H), 6.89 (m<sub>c</sub>, 2H), 7.45 (m<sub>c</sub>, 2H) ppm.

<sup>13</sup>C NMR (126 MHz, CDCl<sub>3</sub>): δ = 14.4, 17.7, 55.4, 59.8, 113.9, 115.4, 127.7, 134.4, 154.9, 160.5, 167.1 ppm.

**HRMS** (APCI) for  $C_{13}H_{17}O_3^+$  [(M+H)<sup>+</sup>] calculated: 221.1172, found: 221.1165.

The data is in accordance with the literature.<sup>[3]</sup>

#### 4.1.6 Ethyl (*E*)-3-(4-(trifluoromethyl)phenyl)but-2-enoate (**8e**)

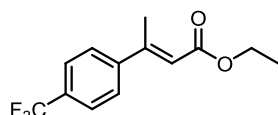

**8e**  
 $C_{13}H_{13}F_3O_2$   
Mw = 258.24

Prepared according to **GP1** from 4-trifluoroacetophenone (3.76 g, 20.0 mmol, 1.00 equiv), NaH (60 wt% in mineral oil, 1.60 g, 40.0 mmol, 2.00 equiv) and triethyl phosphonoacetate (7.9 mL, 40 mmol, 2.0 equiv) in THF (40 mL). The reaction mixture was stirred for 48 h at 40 °C. Purification by flash column chromatography on silica gel (cyclohexane/*tert*-butyl methyl ether = 50:1) yielded **8e** as a colorless oil (3.31 g, 12.8 mmol, 65%).

$R_f$  = 0.46 (SiO<sub>2</sub>, cyclohexane/*tert*-butyl methyl ether = 9:1).

<sup>1</sup>H NMR (500 MHz, CDCl<sub>3</sub>): δ = 1.32 (t, *J* = 7.1 Hz, 3H), 2.57 (d, *J* = 1.3 Hz, 3H), 4.23 (q, *J* = 7.1 Hz, 2H), 6.14 (q, *J* = 1.3 Hz, 1H), 7.56 (d, *J* = 8.4 Hz, 2H), 7.62 (d, *J* = 8.4 Hz, 2H) ppm.

<sup>13</sup>C NMR (126 MHz, CDCl<sub>3</sub>): δ = 14.4, 18.0, 60.2, 119.1, 124.1 (q, *J* = 272.2 Hz), 125.6 (q, *J* = 3.8 Hz), 126.7, 130.9 (q, *J* = 32.7 Hz), 145.9, 153.8, 166.5 ppm.

<sup>19</sup>F NMR (659 MHz, CDCl<sub>3</sub>): δ = -62.7 ppm.

**HRMS** (APCI) for  $C_{13}H_{14}F_3O_2^+$  [(M+H)<sup>+</sup>] calculated: 259.0940, found: 259.0935.

The data is in accordance with literature.<sup>[9]</sup>

#### 4.1.7 Ethyl (*E*)-3-(4-bromophenyl)but-2-enoate (**8f**)

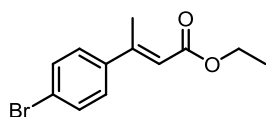

**8f**  
C<sub>12</sub>H<sub>13</sub>BrO<sub>2</sub>  
Mw = 269.14

Prepared according to **GP1** from 1-(4-bromophenyl)ethan-1-one (2.99 g, 15 mmol, 1.0 equiv), NaH (60 wt% in mineral oil, 1.20 g, 30.0 mmol, 2.00 equiv) and triethyl phosphonoacetate (6.0 mL, 30 mmol, 2.0 equiv) in THF (30 mL). The reaction mixture was stirred for 48 h at 40 °C. Purification by flash column chromatography on silica gel (cyclohexane/*tert*-butyl methyl ether = 50:1) yielded **8f** as a colorless oil (2.54 g, 9.44 mmol, 63%).

$R_f$  = 0.44 (SiO<sub>2</sub>, cyclohexane/*tert*-butyl methyl ether = 9:1).

<sup>1</sup>H NMR (500 MHz, CDCl<sub>3</sub>): δ = 1.31 (t, *J* = 7.1 Hz, 3H), 2.54 (d, *J* = 1.2 Hz, 3H), 4.21 (q, *J* = 7.1 Hz, 2H), 6.11 (m<sub>c</sub>, 1H), 7.33 (m<sub>c</sub>, 2H), 7.49 (m<sub>c</sub>, 2H) ppm.

<sup>13</sup>C NMR (126 MHz, CDCl<sub>3</sub>): δ = 14.4, 17.9, 60.1, 117.7, 123.3, 128.0, 131.8, 141.2, 154.1, 166.7 ppm.

HRMS (APCI) for C<sub>12</sub>H<sub>14</sub><sup>79</sup>BrO<sub>2</sub><sup>+</sup> [(M+H)<sup>+</sup>] calculated: 269.0172, found: 269.0168.

The data is in accordance with literature.<sup>[9]</sup>

#### 4.1.8 Ethyl (*E*)-3-(4-chlorophenyl)but-2-enoate (**8g**)

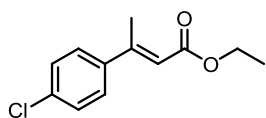

**8g**  
C<sub>12</sub>H<sub>13</sub>ClO<sub>2</sub>  
Mw = 224.68

Prepared according to **GP1** from 1-(4-chlorophenyl)ethan-1-one (2.0 mL, 15 mmol, 1.0 equiv), NaH (60 wt% in mineral oil, 1.20 g, 30.0 mmol, 2.00 equiv) and triethyl phosphonoacetate (6.0 mL, 30 mmol, 2.0 equiv) in THF (30 mL). The reaction mixture was stirred for 48 h at 40 °C. Purification by flash column chromatography on silica gel (cyclohexane/*tert*-butyl methyl ether = 50:1) yielded **8g** as a colorless oil (2.15 g, 10.0 mmol, 67%).

$R_f$  = 0.48 (SiO<sub>2</sub>, cyclohexane/*tert*-butyl methyl ether = 9:1).

<sup>1</sup>H NMR (500 MHz, CDCl<sub>3</sub>): δ = 1.31 (t, *J* = 7.1 Hz, 3H), 2.54 (d, *J* = 1.3 Hz, 3H), 4.21 (q, *J* = 7.1 Hz, 2H), 6.10 (d, *J* = 1.3 Hz, 1H), 7.33 (m<sub>c</sub>, 2H), 7.40 (m<sub>c</sub>, 2H) ppm.

<sup>13</sup>C NMR (126 MHz, CDCl<sub>3</sub>): δ = 14.4, 17.9, 60.0, 117.7, 127.7, 128.8, 135.1, 140.7, 154.1, 166.7 ppm.

HRMS (APCI) for C<sub>12</sub>H<sub>14</sub><sup>35</sup>ClO<sub>2</sub><sup>+</sup> [(M+H)<sup>+</sup>] calculated: 225.0677, found: 225.0672.

The data is in accordance with literature.<sup>[9]</sup>

#### 4.1.9 Ethyl (*E*)-3-(*o*-tolyl)but-2-enoate (**8h**)

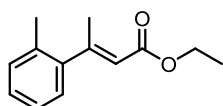

**8h**  
C<sub>13</sub>H<sub>16</sub>O<sub>2</sub>  
Mw = 204.27

Prepared according to **GP1** from 1-(*o*-tolyl)ethan-1-one (2.0 mL, 15 mmol, 1.0 equiv), NaH (60 wt% in mineral oil, 1.20 g, 30.0 mmol, 2.00 equiv) and



triethyl phosphonoacetate (6.0 mL, 30 mmol, 2.0 equiv) in THF (30 mL). The reaction mixture was stirred for 48 h at 40 °C. Purification by flash column chromatography on silica gel (cyclohexane/*tert*-butyl methyl ether = 50:1) yielded **8h** as a colorless oil (1.97 g, 9.66 mmol, 64%).

$R_f = 0.55$  (SiO<sub>2</sub>, cyclohexane/*tert*-butyl methyl ether = 10:1).

<sup>1</sup>H NMR (500 MHz, CDCl<sub>3</sub>): δ = 1.31 (t, *J* = 7.1 Hz, 3H), 2.29 (s, 3H), 2.44 (d, *J* = 1.4 Hz, 3H), 4.21 (q, *J* = 7.1 Hz, 2H), 5.76 (q, *J* = 1.4 Hz, 1H), 7.05–7.08 (m, 1H), 7.14–7.23 (m, 3H) ppm.

<sup>13</sup>C NMR (126 MHz, CDCl<sub>3</sub>): δ = 14.4, 19.8, 20.9, 59.9, 119.5, 125.8, 127.2, 127.8, 130.5, 134.0, 144.0, 158.3, 166.8 ppm.

HRMS (APCI) for C<sub>13</sub>H<sub>17</sub>O<sub>2</sub><sup>+</sup> [(M+H)<sup>+</sup>] calculated: 205.1223, found: 205.1218.

The data is in accordance with literature.<sup>[11]</sup>

#### 4.1.10 Ethyl (*E*)-3-(4-nitrophenyl)but-2-enoate (**8i**)

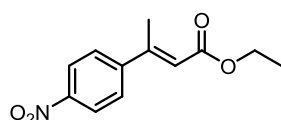

**8i**  
C<sub>12</sub>H<sub>13</sub>NO<sub>4</sub>  
Mw = 235.23

Prepared according to **GP1** from 4-nitroacetophenone (2.48 g, 15.0 mmol, 1.00 equiv), NaH (60 wt% in mineral oil, 1.20 g, 30.0 mmol, 2.00 equiv) and triethyl phosphonoacetate (6.0 mL, 6.78 g, 30.0 mmol, 2.00 equiv) in THF (40 mL). The reaction mixture was stirred for 24 h at 40 °C. Purification by flash column

chromatography on silica gel cyclohexane/*tert*-butyl methyl ether = 20:1) yielded **8i** as a colorless oil (*E/Z* = 88:12, 1.20 g, 5.12 mmol, 34%).

$R_f = 0.37$  (SiO<sub>2</sub>, cyclohexane/*tert*-butyl methyl ether = 9:1).

<sup>1</sup>H NMR (500 MHz, CDCl<sub>3</sub>): δ = 1.32 (t, *J* = 7.2 Hz, 3H), 2.58 (d, *J* = 1.2 Hz, 3H), 4.24 (q, *J* = 7.2 Hz, 2H), 6.18 (m<sub>c</sub>, 1H), 7.61 (m<sub>c</sub>, 2H), 8.21 (m<sub>c</sub>, 2H) ppm.

<sup>13</sup>C NMR (126 MHz, CDCl<sub>3</sub>): δ = 14.4, 18.0, 60.4, 120.3, 123.9, 127.4, 148.1, 148.7, 152.8, 166.2 ppm.

HRMS (APCI) for C<sub>14</sub>H<sub>18</sub>N<sub>2</sub>O<sub>3</sub><sup>+</sup> [(M+H+MeCN)<sup>+</sup>] calculated: 262.1306, found: 262.1158.

IR (ATR):  $\tilde{\nu} = 2986$  (w), 2907 (w), 2114 (w), 1709 (s), 1594 (m), 1511 (s), 1339 (s), 1274 (m), 1177 (s), 1039 (m), 846 (s).

#### 4.1.11 Ethyl (*E*)-3-(4-cyanophenyl)but-2-enoate (**8j**)

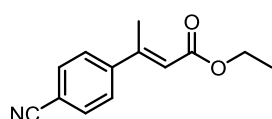

**8j**  
C<sub>13</sub>H<sub>13</sub>NO<sub>2</sub>  
Mw = 215.25

Prepared according to **GP1** from 4-acetylbenzotrile (2.17 g, 15 mmol, 1.0 equiv), NaH (60 wt% in mineral oil, 1.20 g, 30.0 mmol, 2.00 equiv) and triethyl phosphonoacetate (6.0 mL, 30 mmol, 2.0 equiv) in THF (30 mL). The reaction mixture was stirred for 48 h at 40 °C. Purification by flash column chromatography on silica gel

cyclohexane/*tert*-butyl methyl ether = 20:1) yielded **8j** as a colorless oil (2.10 g, 9.76 mmol, 65%).

$R_f = 0.21$  (SiO<sub>2</sub>, cyclohexane/*tert*-butyl methyl ether = 9:1).

<sup>1</sup>H NMR (500 MHz, CDCl<sub>3</sub>):  $\delta = 1.31$  (t,  $J = 7.1$  Hz, 3H), 2.55 (d,  $J = 1.3$  Hz, 3H), 4.22 (q,  $J = 7.1$  Hz, 2H), 6.13 (q,  $J = 1.3$  Hz, 1H), 7.54 (m<sub>c</sub>, 2H), 7.66 (m<sub>c</sub>, 2H) ppm.

<sup>13</sup>C NMR (126 MHz, CDCl<sub>3</sub>):  $\delta = 14.4, 17.8, 60.3, 112.6, 118.5, 119.8, 127.1, 132.4, 146.8, 153.1, 166.2$  ppm.

HRMS (APCI) for C<sub>13</sub>H<sub>14</sub>NO<sub>2</sub><sup>+</sup> [(M+H)<sup>+</sup>] calculated: 216.1019, found: 216.1020.

The data is in accordance with literature.<sup>[9]</sup>

#### 4.1.12 Ethyl (*E*)-3-(4-acetylphenyl)but-2-enoate (**8k**)

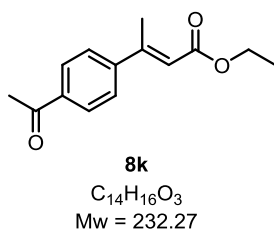

Prepared according to **GP1** from 1,1'-(1,4-phenylene)bis(ethan-1-one) (2.43 g, 15.0 mmol, 1.00 equiv), NaH (60 wt% in mineral oil, 0.670 g, 16.5 mmol, 1.1 equiv) and triethyl phosphonoacetate (3.3 mL, 17 mmol, 1.1 equiv) in THF (40 mL). The reaction mixture was stirred for 24 h at 40 °C. Purification by flash column chromatography on silica gel cyclohexane/*tert*-butyl methyl ether = 10:1) yielded **8k** as a colorless oil (*E/Z* = 87:13, 1.29 g, 5.54 mmol, 37%).

$R_f = 0.23$  (SiO<sub>2</sub>, cyclohexane/*tert*-butyl methyl ether = 9:1).

<sup>1</sup>H NMR (500 MHz, CDCl<sub>3</sub>):  $\delta = 1.32$  (t,  $J = 7.2$  Hz, 3H), 2.58 (d,  $J = 1.4$  Hz, 3H), 2.61 (s, 3H), 4.23 (q,  $J = 7.2$  Hz, 2H), 6.17 (q,  $J = 1.3$  Hz, 1H), 7.55 (m<sub>c</sub>, 2H), 7.95 (m<sub>c</sub>, 2H) ppm.

Indicative signals for the *Z*-isomer are at  $\delta = 1.10, 4.00, 5.95, 7.28$ .

<sup>13</sup>C NMR (126 MHz, CDCl<sub>3</sub>):  $\delta = 14.5$  (C-2''), 18.0 (C-4), 26.8 (C-6'), 60.2 (C-1''), 119.0 (C-2), 126.7 (C-2'), 128.7 (C-3'), 137.3 (C-4'), 146.9 (C-1'), 154.1 (C-3), 166.6 (C-1), 197.6 (C-5') ppm.

HRMS (APCI) for C<sub>14</sub>H<sub>17</sub>O<sub>3</sub><sup>+</sup> [(M+H)<sup>+</sup>] calculated: 233.1172, found: 233.1169.

IR (ATR):  $\tilde{\nu} = 2975$  (w), 1681 (m), 1626 (m), 1358 (m), 1261 (s), 1159 (s), 1039 (m), 829 (m).

The data is in accordance with literature.<sup>[12]</sup>

#### 4.1.13 Ethyl (*E*)-3-(4-hydroxyphenyl)but-2-enoate (**8l**)

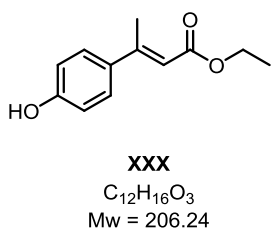

In a 10 mL-schlenkflask ethyl (*E*)-3-(4-((*tert*-butyldiphenylsilyl)oxy)phenyl)but-2-enoate (**8m**, 204 mg, 1.24 mmol, 1.00 equiv) was desolved in THF (5 mL). Tetrabutylammonium fluoride solution (1M, 1.4 mL, 1.4 mmol, 1.1 equiv) was added. The resulting solution was stirred for 1 h at rt until full conversion

(conversion monitored *via* TLC). After quenching the reaction by addition of saturated aqueous NH<sub>4</sub>Cl solution (10 mL) the aqueous phase was extracted with *tert*-butyl methyl ether (3 x 10 mL) and the combined organic layers are dried over MgSO<sub>4</sub> and filtered. All volatiles were removed and the obtained crude product **8i** was purified by flash column chromatography on silica gel (cyclohexane/ *tert*-butyl methyl ether = 10:1). The product **8i** was obtained as a white solid (150 mg, 0.728 mmol, 59%).

$R_f = 0.57$  (SiO<sub>2</sub>, cyclohexane/*tert*-butyl methyl ether = 2:1).

<sup>1</sup>H NMR (500 MHz, CDCl<sub>3</sub>):  $\delta = 1.31$  (t,  $J = 7.1$  Hz, 3H), 2.55 (d,  $J = 1.3$  Hz, 3H), 4.21 (q,  $J = 7.1$  Hz, 2H), 5.15 (br s, 1H), 6.09 (q,  $J = 1.3$  Hz, 1H), 6.83 (m<sub>c</sub>, 2H), 7.40 (m<sub>c</sub>, 2H) ppm.

<sup>13</sup>C NMR (126 MHz, CDCl<sub>3</sub>):  $\delta = 14.4, 17.8, 59.9, 115.4, 115.5, 128.0, 134.7, 155.0, 156.7, 167.3$  ppm.

HRMS (APCI) for C<sub>13</sub>H<sub>14</sub>NO<sub>2</sub><sup>+</sup> [(M+H)<sup>+</sup>] calculated: 207.1016, found: 207.1011.

IR (ATR):  $\tilde{\nu} = 3340$  (m), 1676 (m), 1595 (m), 1509 (w), 1435 (w), 1274 (m), 1171 (m), 1041 (w), 869 (w), 835 (m) cm<sup>-1</sup>.

M.p.: T = 94 °C.

#### 4.1.14 Ethyl (*E*)-3-(4-((*tert*-butyldiphenylsilyloxy)phenyl)but-2-enoate (**9m**)

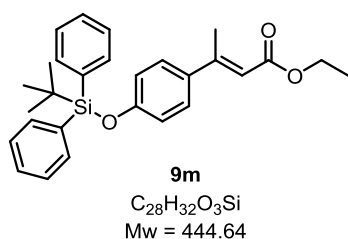

Prepared according to **GP1** from 1-(4-((*tert*-butyldiphenylsilyloxy)phenyl)ethan-1-one (1.7 g, 4.6 mmol, 1.0 equiv), NaH (60 wt% in mineral oil, 0.40 g, 10.0 mmol, 2.2 equiv) and triethyl phosphonoacetate (2.0 mL, 10 mmol, 2.2 equiv) in THF (10 mL). The reaction mixture was stirred for 20 h at 40 °C. Purification by flash column chromatography on silica gel (cyclohexane/*tert*-butyl methyl ether = 100:1) yielded **9m** as a white solid (E/Z = 93:7, 0.550 g, 1.24 mmol, 27%).

$R_f = 0.69$  (SiO<sub>2</sub>, cyclohexane/*tert*-butyl methyl ether = 9:1).

<sup>1</sup>H NMR (500 MHz, CDCl<sub>3</sub>):  $\delta = 1.10$  (s, 9H), 1.28 (t,  $J = 7.1$  Hz, 3H), 2.49 (d,  $J = 1.2$  Hz, 3H), 4.18 (q,  $J = 7.1$  Hz, 2H), 6.03 (q,  $J = 1.2$  Hz, 1H), 6.74 (m<sub>c</sub>, 2H), 7.25 (m<sub>c</sub>, 2H), 7.34–7.40 (m, 4H), 7.41–7.46 (m, 2H), 7.69–7.73 (m, 4H) ppm.

<sup>13</sup>C NMR (126 MHz, CDCl<sub>3</sub>):  $\delta = 14.4, 17.6, 19.6, 26.6, 59.7, 115.4, 119.7, 127.5, 127.9, 130.1, 132.7, 134.7, 135.6, 155.0, 156.7, 167.2$  ppm.

The NMR spectra contain 7% of the *Z*-isomer, indicative signals in <sup>1</sup>H NMR are at 1.20, 3.74, 5.29 and 7.68 ppm.

<sup>29</sup>Si DEPT NMR (99MHz,  $J = 20$  Hz, CDCl<sub>3</sub>):  $\delta = -5.6$  ppm.

**HRMS** (APCI) for  $C_{28}H_{33}O_3Si^+$  [(M+H)<sup>+</sup>] calculated: 445.2193, found: 445.2184.

**IR** (ATR):  $\tilde{\nu}$  = 2930 (w), 2892 (w), 2857 (w), 1703 (m), 1598 (m), 1507 (m), 1424 (w), 1372 (w), 1258 (s), 1112 (s), 1044 (m), 1007 (w), 916 (s), 819 (s), 696 (s)  $cm^{-1}$ .

**M.p.:** T = 69 °C.

#### 4.1.10 Ethyl (*E*)-3-(thiophen-2-yl)but-2-enoate (**8o**)

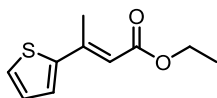

**8o**  
 $C_{10}H_{12}O_2S$   
Mw = 196.26

Prepared according to **GP1** from 1-(thiophen-2-yl)ethan-1-one (1.6 mL, 15 mmol, 1.0 equiv), NaH (60 wt% in mineral oil, 1.20 g, 30.0 mmol, 2.00 equiv) and triethyl phosphonoacetate (6.0 mL, 30 mmol, 2.0 equiv) in THF (30 mL). The reaction mixture was stirred for 36 h at 40 °C.

Purification by flash column chromatography on silica gel (cyclohexane/*tert*-butyl methyl ether = 50:1) yielded **8o** as a colorless oil (1.64 g, 8.33 mmol, 56%).

$R_f$  = 0.43 (SiO<sub>2</sub>, cyclohexane/*tert*-butyl methyl ether = 10:1).

**<sup>1</sup>H NMR** (500 MHz, CDCl<sub>3</sub>):  $\delta$  = 1.31 (t,  $J$  = 7.1 Hz, 3H), 2.60 (d,  $J$  = 1.2 Hz, 3H), 4.20 (q,  $J$  = 7.1 Hz, 2H), 6.25 (q,  $J$  = 1.2 Hz, 1H), 7.04 (m<sub>c</sub>, 1H), 7.30–7.32 (m, 2H) ppm.

**<sup>13</sup>C NMR** (126 MHz, CDCl<sub>3</sub>):  $\delta$  = 14.4, 17.4, 59.9, 114.4, 126.7, 127.1, 128.0, 145.7, 147.8, 166.8 ppm.

**HRMS** (APCI) for  $C_{10}H_{13}O_2S^+$  [(M+H)<sup>+</sup>] calculated: 197.0631, found: 197.0626.

The data is in accordance with literature.<sup>[9]</sup>

#### 4.1.15 Ethyl (*E*)-3-cyclopropyl-3-phenylacrylate (**8p**)

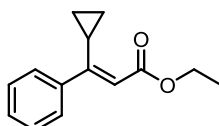

**8p**  
 $C_{14}H_{16}O_2$   
Mw = 216.28

Prepared according to **GP1** from cyclopropyl(phenyl)methanone (2.1 mL, 15 mmol, 1.0 equiv), NaH (60 wt% in mineral oil, 1.20 g, 30.0 mmol, 2.00 equiv) and triethyl phosphonoacetate (6.0 mL, 30 mmol, 2.0 equiv) in THF (30 mL). The reaction mixture was stirred for 48 h at 40 °C.

Purification by flash column chromatography on silica gel (cyclohexane/*tert*-butyl methyl ether = 50:1) yielded **8p** as a colorless oil (0.64 g, 3.0 mmol, 35%).

$R_f$  = 0.5 (SiO<sub>2</sub>, cyclohexane/*tert*-butyl methyl ether = 9:1).

**<sup>1</sup>H NMR** (500 MHz, CDCl<sub>3</sub>):  $\delta$  = 0.47 (m<sub>c</sub>, 2H), 0.89 (m<sub>c</sub>, 2H), 1.30 (t,  $J$  = 7.1 Hz, 3H), 3.12 (m<sub>c</sub>, 1H), 4.21 (q,  $J$  = 7.1 Hz, 2H), 5.79 (d,  $J$  = 0.8 Hz, 1H), 7.11–7.15 (m, 2H), 7.27–7.33 (m, 3H) ppm.

**<sup>13</sup>C NMR** (126 MHz, CDCl<sub>3</sub>):  $\delta$  = 7.0, 13.6, 14.4, 59.8, 118.9, 127.8, 127.8, 128.1, 138.9, 163.2, 167.0 ppm.

**HRMS** (APCI) for  $C_{14}H_{17}O_2^+$  [(M+H)<sup>+</sup>] calculated: 217.1223, found: 217.1215.

The data is in accordance with literature.<sup>[9]</sup>

#### 4.1.16 Hex-5-en-1-yl (*E*)-3-phenylbut-2-enoate (**8q**)

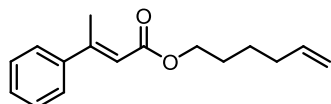

**8q**  
 $C_{16}H_{20}O_2$   
Mw = 244.33

Following a literature procedure,<sup>[13]</sup> in a 25 mL-schlenk tube, (*E*)-3-phenylbut-2-enoic acid (0.50 g, 3.1 mmol, 1.00 equiv) was dissolved in  $CH_2Cl_2$  (10 mL). DMAP (452 mg, 3.70 mmol, 1.20 equiv) and hex-5-en-1-ol (0.73 mL, 6.2 mmol, 2.0 equiv) were added. The resulting solution was cooled to 0 °C and DCC (954 mg, 4.62 mmol, 1.50 equiv) was added. The solution was stirred for 5 min at 0 °C and 18 h at rt until full conversion was detected (conversion monitored *via* TLC). Precipitated urea was filtered off over a plug of silica gel (3 x 3 cm, eluent:  $CH_2Cl_2$ , 30 mL). The filtrate was evaporated and the obtained crude product **8q** was purified by flash column chromatography on silica gel (*n*-pentane/*tert*-butyl methyl ether = 100:1). Remaining urea residues were removed by dissolving the product **8q** in  $Et_2O$  (10 mL) and washing the organic layer with aqueous HCl (2M, 3 x 10 mL). The organic layer was dried over  $MgSO_4$ , filtered and all volatiles were removed. The product **8q** was obtained as a yellow oil (330 mg, 1.35 mmol, 44%).

$R_f = 0.73$  ( $SiO_2$ , cyclohexane/*tert*-butyl methyl ether = 9:1).

<sup>1</sup>H NMR (500 MHz,  $CDCl_3$ ):  $\delta = 1.46$ – $1.55$  (m, 2H),  $1.66$ – $1.74$  (m, 2H), 2.11 (m<sub>c</sub>, 2H), 2.57 (d,  $J = 1.3$  Hz, 3H), 4.16 (t,  $J = 6.6$  Hz, 2H), 4.97 (m<sub>c</sub>, 1H), 5.02 (m<sub>c</sub>, 1H), 5.81 (m<sub>c</sub>, 1H), 6.13 (q,  $J = 1.3$  Hz, 1H), 7.34–7.40 (m, 3H), 7.45–7.50 (m, 2H) ppm.

<sup>13</sup>C NMR (126 MHz,  $CDCl_3$ ):  $\delta = 18.0$ , 25.4, 28.3, 33.4, 63.9, 114.9, 117.3, 126.4, 128.6, 129.0, 138.5, 142.3, 155.6, 167.0 ppm.

**HRMS** (APCI) for  $C_{16}H_{21}O_2^+$  [(M+H)<sup>+</sup>] calculated: 245.1536, found: 245.1532.

**IR** (ATR):  $\tilde{\nu} = 2934$  (w), 1709 (s), 1626 (m), 1575 (w), 1445 (w), 1379 (w), 1343 (m), 1270 (m), 1154 (s), 1023 (m), 909 (m), 870 (m), 764 (s), 692 (m)  $cm^{-1}$ .

#### 4.1.17 Ethyl (*E*)-3-cyclohexylbut-2-enoate (**8t**)

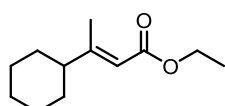

**8t**  
 $C_{12}H_{20}O_2$   
Mw = 196.29

Prepared according to **GP1** from 1-cyclohexylethan-1-one (2.1 mL, 15 mmol, 1.0 equiv), NaH (60 wt% in mineral oil, 1.20 g, 30.0 mmol, 2.00 equiv) and triethyl phosphonoacetate (6.0 mL, 30 mmol, 2.0 equiv) in THF (30 mL). The reaction mixture was stirred for 48 h at 40 °C. Purification by flash column chromatography on silica gel (cyclohexane/*tert*-butyl methyl ether = 50:1) yielded **8t** as a colorless oil (*E/Z* = 90:10, 2.22 g, 11.3 mmol, 75%).

$R_f = 0.56$  (SiO<sub>2</sub>, cyclohexane/*tert*-butyl methyl ether = 10:1).

<sup>1</sup>H NMR (500 MHz, CDCl<sub>3</sub>):  $\delta = 1.11\text{--}1.39$  (m, 8H), 1.55–1.82 (m, 5H), 1.96 (tt,  $J = 1.9$  Hz,  $J = 2.8$  Hz, 1H), 2.13 (d,  $J = 1.2$  Hz, 3H), 4.13 (q,  $J = 7.1$  Hz, 2H), 5.64 (m<sub>c</sub>, 1H) ppm.

The sample contains 10% of the *Z*-isomer (detected *via* <sup>1</sup>H NMR and <sup>1</sup>H-<sup>1</sup>H NOESY). Therefore, the value of the integration for the cyclohexyl substituent is too high (see the attached spectra).

<sup>13</sup>C NMR (126 MHz, CDCl<sub>3</sub>):  $\delta = 14.4, 17.5, 26.2, 26.5, 31.5, 48.8, 59.5, 114.0, 164.9, 167.4$  ppm.

HRMS (APCI) for C<sub>12</sub>H<sub>21</sub>O<sub>2</sub><sup>+</sup> [(M+H)<sup>+</sup>] calculated: 197.1536, found: 197.1531.

The data is in accordance with literature.<sup>[14]</sup>

#### 4.1.18 Ethyl (*E*)-3-methylundec-2-enoate (**8u**)

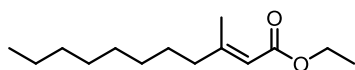

**8u**  
C<sub>14</sub>H<sub>26</sub>O<sub>2</sub>  
Mw = 226.36

Prepared according to **GP1** from decan-2-one (2.8 mL, 15 mmol, 1.0 equiv), NaH (60 wt% in mineral oil, 1.20 g, 30.0 mmol, 2.00 equiv) and triethyl phosphonoacetate (6.0 mL, 30 mmol, 2.0 equiv) in THF (30 mL). The reaction mixture was stirred for 48 h at 40 °C. Purification by flash column chromatography on silica gel (cyclohexane/*tert*-butyl methyl ether = 50:1) yielded **8u** as a colorless oil (*E/Z* = 77:23, 3.17 g, 14.0 mmol, 93%).

$R_f = 0.59$  (SiO<sub>2</sub>, cyclohexane/*tert*-butyl methyl ether = 9:1).

*E*-isomer:

<sup>1</sup>H NMR (500 MHz, CDCl<sub>3</sub>):  $\delta = 0.88$  (t,  $J = 6.9$  Hz, 3H), 1.16–1.36 (m, 13H), 1.41–1.49 (m, 2H), 2.12 (m<sub>c</sub>, 2H), 2.14 (d,  $J = 1.3$  Hz, 3H), 4.14 (q,  $J = 7.1$  Hz, 2H), 5.65 (q,  $J = 1.2$  Hz, 1H) ppm.

<sup>13</sup>C NMR (126 MHz, CDCl<sub>3</sub>):  $\delta = 14.2, 14.4, 18.9, 22.7, 27.5, 29.3, 29.3, 29.5, 31.9, 41.0, 59.5, 115.5, 160.4, 167.0$  ppm.

*Z*-isomer:

<sup>1</sup>H NMR (500 MHz, CDCl<sub>3</sub>):  $\delta = 0.87$  (t,  $J = 7.0$  Hz, 3H), 2.54 (d,  $J = 1.3$  Hz, 3H), 4.21 (q,  $J = 7.1$  Hz, 2H), 6.10 (d,  $J = 1.3$  Hz, 1H), 1.87 (d,  $J = 1.3$  Hz, 3H), 4.13 (q,  $J = 7.1$  Hz, 2H), 5.63 (m<sub>c</sub>, 1H) ppm.

<sup>13</sup>C NMR (126 MHz, CDCl<sub>3</sub>):  $\delta = 14.2, 14.4, 25.2, 28.3, 29.3, 29.5, 29.8, 33.5, 59.4, 116.0, 160.8$  ppm.

*E*- and *Z*-isomer could be identified *via* <sup>1</sup>H-<sup>1</sup>H NOESY.

Not all signals for the *Z*-isomer could be detected in <sup>1</sup>H and <sup>13</sup>C NMR due to low concentration and overlay with signals of the *E*-isomer.

**HRMS** (APCI) for  $C_{14}H_{27}O_2^+$  [(M+H)<sup>+</sup>] calculated: 227.2006, found: 227.1997.

The data is in accordance with literature.<sup>[14]</sup>

#### 4.1.19 (*E*)-*N,N*-diethyl-3-phenylbut-2-enamide (**10**)

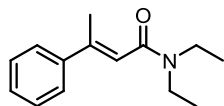

**10**  
 $C_{14}H_{19}NO$   
Mw = 217.31

Prepared according to **GP1** from acetophenone (0.47 mL, 4.0 mmol, 1.0 equiv), NaH (60 wt% in mineral oil, 316 mg, 7.96 mmol, 2.00 equiv) and diethyl (2-(diethylamino)-2-oxoethyl)phosphonate (**S6**, 1.8 mL, 8.0 mmol, 2.0 equiv) in THF (8 mL). The reaction mixture was stirred for 24 h at 40 °C. Purification by flash column chromatography on silica gel

(cyclohexane/*tert*-butyl methyl ether = 4:1) yielded **10** as a colorless oil (589 mg, 2.71 mmol, 68%).

$R_f$  = 0.16 (SiO<sub>2</sub>, cyclohexane/*tert*-butyl methyl ether = 9:1).

<sup>1</sup>H NMR (500 MHz, CDCl<sub>3</sub>): δ = 1.18 (t, *J* = 7.0 Hz, 6H), 2.30 (d, *J* = 1.2 Hz, 3H), 3.43 (m, 4H), 6.29 (d, *J* = 1.2 Hz, 1H), 7.29–7.38 (m, 3H), 7.42–7.46 (m, 2H) ppm.

<sup>13</sup>C NMR (126 MHz, CDCl<sub>3</sub>): δ = 13.3, 14.5, 18.0, 39.7, 42.7, 120.3, 126.1, 128.2, 128.5, 142.3, 145.6, 167.7 ppm.

**HRMS** (APCI) for  $C_{14}H_{20}NO^+$  [(M+H)<sup>+</sup>] calculated: 218.1539, found: 218.1531.

The data is in accordance with literature.<sup>[15]</sup>

#### 4.1.20 Ethyl (*E*)-3-(4-(phenylethynyl)phenyl)but-2-enoate (**S3**)

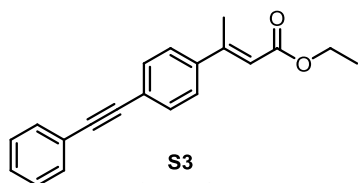

**S3**  
 $C_{20}H_{18}O_2$   
Mw = 290.36

Prepared according to **GP1** from 1-(4-(phenylethynyl)phenyl)ethan-1-one (1.65 g, 7.50 mmol, 1.00 equiv), NaH (60 wt% in mineral oil, 0.60 g, 15 mmol, 2.0 equiv) and triethyl phosphonoacetate (3.0 mL, 3.4 g, 15 mmol, 2.0 equiv) in THF (20 mL). The reaction mixture was

stirred for 24 h at 40 °C. Purification by flash column chromatography on silica gel (cyclohexane/*tert*-butyl methyl ether = 70:1) yielded **S3** as a colorless oil (1.36 g, 4.96 mmol, 66%).

$R_f$  = 0.46 (SiO<sub>2</sub>, cyclohexane/*tert*-butyl methyl ether = 9:1).

<sup>1</sup>H NMR (500 MHz, CDCl<sub>3</sub>): δ = 1.33 (t, *J* = 7.0 Hz, 3H), 2.58 (d, *J* = 1.3 Hz, 3H), 4.23 (q, *J* = 7.3 Hz, 2H), 6.17 (d, *J* = 1.3 Hz, 1H), 7.34–7.38 (m, 2H), 7.45–7.49 (m, 2H), 7.51–7.56 (m, 5H) ppm.

<sup>13</sup>C NMR (126 MHz, CDCl<sub>3</sub>): δ = 14.4, 17.7, 60.0, 89.1, 90.9, 117.7, 123.2, 124.1, 126.4, 128.5, 128.5, 131.7, 131.8, 141.9, 154.5, 166.8 ppm.

**HRMS** (APCI) for  $C_{20}H_{19}O_2^+$  [(M+H)<sup>+</sup>] calculated: 291.1380, found: 291.1383.

**IR** (ATR):  $\tilde{\nu}$  = 2978 (w), 2908 (w), 2117 (w), 1705 (m), 1619 (m), 1440 (m), 1342 (m), 1272 (m), 1167 (s), 1039 (m), 879 (m), 831 (s), 756 (s).

## 4.2 Syntheses of alkyl phosphonates

### 4.2.1 *tert*-Butyl 2-(diethoxyphosphoryl)acetate (**S4**)

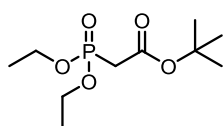

**S4**  
 $C_{10}H_{21}O_5P$   
Mw = 252.25

According to a literature procedure<sup>[16]</sup> a 25 mL two neck flask with reflux condenser was charged with *tert*-butyl bromoacetate (7.2 mL, 50 mmol, 1.0 equiv) and triethylphosphite (8.6 mL, 50 mmol, 1.0 equiv) was added.

The reaction mixture was stirred for 1 h at 100 °C and heated to reflux for 14 h until full conversion was detected (conversion monitored *via* TLC).

The obtained crude product **S4** was purified by fractional distillation (106 °C,  $8.6 \cdot 10^{-1}$  mbar) and yielded **S4** as a colorless oil (10.8 g, 43.0 mmol, 86%).

$R_f$  = 0.56 (SiO<sub>2</sub>, cyclohexane/*tert*-butyl methyl ether = 9:1).

**<sup>1</sup>H NMR** (500 MHz, CDCl<sub>3</sub>):  $\delta$  = 1.34 (t,  $J$  = 7.1 Hz, 6H), 1.46 (s, 9H), 2.87 (d,  $J$  = 21.4 Hz, 2H), 4.15 (m<sub>c</sub>, 4H) ppm.

**<sup>13</sup>C NMR** (126 MHz, CDCl<sub>3</sub>):  $\delta$  = 16.4 (d,  $J$  = 6.1 Hz), 28.0, 35.7 (d,  $J$  = 133.1 Hz), 62.5 (d,  $J$  = 6.0 Hz), 82.1, 165.0 (d,  $J$  = 6.3 Hz) ppm.

**<sup>31</sup>P NMR** (202 MHz, CDCl<sub>3</sub>):  $\delta$  = 20.5 (m<sub>c</sub>) ppm.

**HRMS** (APCI) for  $C_{10}H_{22}O_5P^+$  [(M-H)<sup>+</sup>] calculated: 253.1199, found: 253.1191.

The data is in accordance with literature.<sup>[16,17]</sup>

### 4.2.2 2-Chloro-N,N-diethylacetamide (**S5**)

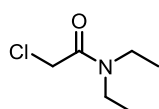

**S5**  
 $C_6H_{12}ClNO$   
Mw = 149.62

According to a literature procedure<sup>[18]</sup> diethylamine (3.1 mL, 30 mmol, 1.0 equiv) was dissolved in CH<sub>2</sub>Cl<sub>2</sub> (150 mL). Triethylamine (4.8 mL, 38 mmol, 1.3 equiv) was added and chloroacetylchloride (2.6 mL, 33 mmol, 1.1 equiv) was added dropwise over 15 min. The reaction mixture was stirred for 16 h at rt until full conversion (conversion monitored *via* TLC). The reaction mixture

was diluted with CH<sub>2</sub>Cl<sub>2</sub> (50 mL) and washed with aqueous HCl (1M, 3 x 40 mL). The organic layer was dried over MgSO<sub>4</sub> and filtered. The obtained crude product **S5** was purified by flash column chromatography on silica gel (cyclohexane/*tert*-butyl methyl ether = 2:1) and yielded **S5** as a orange oil (3.18 g, 21.3 mmol, 71%).

$R_f$  = 0.28 (SiO<sub>2</sub>, cyclohexane/*tert*-butyl methyl ether = 1:1).

**<sup>1</sup>H NMR** (500 MHz, CDCl<sub>3</sub>):  $\delta$  = 1.13 (t,  $J$  = 7.1 Hz, 3H), 1.22 (t,  $J$  = 7.1 Hz, 3H), 3.37 (m<sub>c</sub>,



4H), 4.04 (s, 2H) ppm.

$^{13}\text{C}$  NMR (126 MHz,  $\text{CDCl}_3$ ):  $\delta$  = 12.7, 14.4, 40.6, 41.3, 42.5, 165.8 ppm.

HRMS (APCI) for  $\text{C}_6\text{H}_{13}\text{ClNO}^+$  [(M+H) $^+$ ] calculated: 150.0680, found: 150.0677.

IR (ATR):  $\tilde{\nu}$  = 2973 (w), 1639 (s), 1429 (m), 1380 (m), 1315 (w), 1253 (m), 1218 (m), 1120 (m), 1098 (m), 1016 (w), 950 (w), 788 (m), 721 (w)  $\text{cm}^{-1}$ .

#### 4.2.3 Diethyl (2-(diethylamino)-2-oxoethyl)phosphonate (S6)

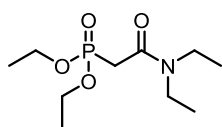

**S6**  
 $\text{C}_{10}\text{H}_{22}\text{NO}_4\text{P}$   
Mw = 251.26

According to a literature procedure<sup>[15]</sup> a 25 mL two neck flask with reflux condenser was charged with 2-chloro-N,N-diethylacetamide (**S6**, 3.00 g, 20.0 mmol, 1.00 equiv) and triethylphosphite (3.6 mL, 21.1 mmol, 1.15 equiv) was added. The reaction mixture was stirred for 8 h at 180 °C. The obtained crude product **S6** was purified by fractional distillation (125 °C,  $1.2 \cdot 10^{-1}$  mbar) and yielded **S6** as a colorless oil (4.01 g, 15.9 mmol, 80%).

Bp = 125 °C ( $1.2 \cdot 10^{-1}$  mbar).

$^1\text{H}$  NMR (500 MHz,  $\text{CDCl}_3$ ):  $\delta$  = 1.12 (t,  $J$  = 7.1 Hz, 3H), 1.18 (t,  $J$  = 7.1 Hz, 3H), 1.32 (t,  $J$  = 7.0 Hz, 6H), 3.00 (d,  $J$  = 22.0 Hz, 2H), 3.40 (m<sub>c</sub>, 4H), 4.16 (m<sub>c</sub>, 4H) ppm.

$^{13}\text{C}$  NMR (126 MHz,  $\text{CDCl}_3$ ):  $\delta$  = 13.0, 14.2, 16.4 (d,  $J$  = 6.3 Hz), 33.5 (d,  $J$  = 134.0 Hz), 40.6, 43.1, 62.6 (d,  $J$  = 6.5 Hz), 164.0 (d,  $J$  = 5.6 Hz) ppm.

$^{31}\text{P}$  NMR (202 MHz,  $\text{CDCl}_3$ ):  $\delta$  = 21.4 (m<sub>c</sub>) ppm.

HRMS (APCI) for  $\text{C}_{10}\text{H}_{23}\text{NO}_4\text{P}^+$  [(M+H) $^+$ ] calculated: 252.1359, found: 252.1351.

The data is in accordance with literature.<sup>[15]</sup>

### 4.3 Synthesis of [SIMesCuCl] 6

#### 4.3.1 Synthesis of $N^1, N^2$ -dimesitylethane-1,2-diaminium chloride (S7)

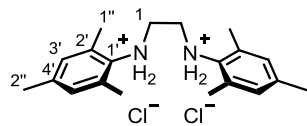

**S7**  
 $\text{C}_{20}\text{H}_{30}\text{Cl}_2\text{N}_2$   
Mw = 369.37

Following a literature procedure,<sup>[2]</sup> in a 250 mL-schlenk flask,  $N^1, N^2$ -dimesitylethane-1,2-diimine (5.00 g, 17.1 mmol, 1.00 equiv) was dissolved in THF (80 mL) and the solution was cooled to 0 °C.  $\text{NaBH}_4$  (2.59 g, 68.4 mmol, 4.00 equiv) was added and the suspension was stirred for 15 min at 0 °C. Concentrated aqueous HCl (2.9 ml, 34 mmol, 2.0 equiv) was added dropwise over 30 min. The suspension was stirred for 1 h at 0 °C. Aqueous HCl (3M, 130 mL) was added and the suspension was stirred for 16 h at rt. The precipitate was collected on a sintered funnel and washed with  $\text{H}_2\text{O}$  (100 mL). The obtained product was dried under reduced pressure ( $2 \cdot 10^{-2}$  mbar) and used without further purification. The product **S7** (4.88 g, 13.2 mmol, 77%) was obtained as a white solid.

**<sup>1</sup>H NMR** (500 MHz, DMSO-*d*<sub>6</sub>): δ = 2.22 (s, 6H, H-2''), 2.31–2.40 (m, 12H, H-1''), 3.34–3.49 (m, 4H, H-1), 6.91 (s, 4H, H-3') ppm.

**<sup>13</sup>C NMR** (126 MHz, DMSO-*d*<sub>6</sub>): δ = 18.0 (C-1''), 20.2 (C-2''), 46.9 (C-4), 129.8 (C-3'), 130.9 (C-1'), 135.8 (C-4') ppm. C-2' could not be detected in <sup>13</sup>C NMR.

**HRMS** (APCI) for C<sub>20</sub>H<sub>29</sub>N<sub>2</sub><sup>+</sup> [(M-2Cl-H)<sup>+</sup>]: calculated: 297.2325, found: 297.2320.

The data is in accordance with literature.<sup>[19]</sup>

#### 4.3.2 Synthesis of 1,3-dimesityl-4,5-dihydro-1H-imidazol-3-ium chloride (**S8**)

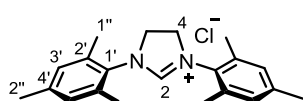

**S8**  
C<sub>21</sub>H<sub>27</sub>ClN<sub>2</sub>  
Mw = 342.91

Following a literature procedure<sup>[20]</sup>, in a 100 mL-two-necked flask, N<sup>1</sup>,N<sup>2</sup>-dimesitylethane-1,2-diaminium chloride (**S7**, 4.80 g, 13.0 mmol, 1.00 equiv) was suspended in triethylorthoformate (65 mL) and formic acid (3 drops) was added. The resulting suspension was stirred for 48 h at 120 °C. The precipitate was filtered off and washed with Et<sub>2</sub>O (30 mL). The obtained crude product was purified by flash column chromatography on silica gel (CH<sub>2</sub>Cl<sub>2</sub>/MeOH = 50:1) and yielded **S8** (3.09 mg, 9.01 mmol, 69%) as yellow solid.

**<sup>1</sup>H NMR** (500 MHz, CDCl<sub>3</sub>): δ = 2.25 (s, 6H, H-2''), 2.32–2.39 (m, 12H, H-1''), 4.50–4.59 (m, 4H, H-4), 6.88–6.94 (m, 4H, H-3'), 9.41 (m<sub>c</sub>, 1H, H-2) ppm.

**<sup>13</sup>C NMR** (126 MHz, CDCl<sub>3</sub>): δ = 18.0 (C-1''), 21.1 (C-2''), 52.0 (C-4), 130.1 (C-3'), 130.3 (C-1'), 135.0 (C-2''), 140.5 (C-4'), 160.0 (C-2) ppm.

**HRMS** (APCI) for C<sub>21</sub>H<sub>27</sub>N<sub>2</sub><sup>+</sup> [(M-Cl)<sup>+</sup>]: calculated: 307.2169, found: 442.1559.

**IR** (ATR):  $\tilde{\nu}$  = 3242 (w), 2953 (w), 2914 (w), 2830 (w), 1620 (s), 1481 (m), 1450 (m), 1376 (w), 1266 (s), 1216 (s), 1151 (w), 1042 (m), 984 (w), 936 (w), 845 (m), 819 (m), 731 (s) cm<sup>-1</sup>.

The data is in accordance with literature.<sup>[20]</sup>

#### 4.3.3 Synthesis of (1,3-dimesitylimidazolidin-2-ylidene)copper(I) chloride (**6**)

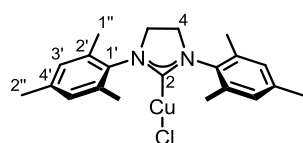

**6**  
C<sub>21</sub>H<sub>26</sub>ClCuN<sub>2</sub>  
Mw = 405.44

Following a literature procedure,<sup>[21]</sup> a 25 mL-two-necked flask was charged with copper(I) chloride (99.99%, 289 mg, 2.92 mmol, 1.00 equiv), 1,3-dimesityl-4,5-dihydro-1H-imidazol-3-ium chloride (**S8**, 1.00 g, 2.92 mmol, 1.00 equiv) and K<sub>2</sub>CO<sub>3</sub> (806 mg, 5.83 mmol, 2.00 equiv). The flask was evacuated and backfilled with nitrogen (2 x). Acetone (12 mL) was added and the resulting yellow suspension was

stirred for 24 h at 60 °C. The reaction mixture was filtered over a plug of silica (3 x 2 cm, eluent: CH<sub>2</sub>Cl<sub>2</sub>, 2 x 30 mL) and the yellow filtrate was concentrated under reduced pressure to ~5 mL. *n*-Pentane (50 mL) was added rapidly to precipitate the crude product, which was collected on a funnel and washed with *n*-pentane (2 x 20 mL). The resulting yellow crystals were dried under reduced pressure. Copper(I)/NHC complex **6** (845 mg, 2.09 mmol, 72%) was obtained as yellow crystals.

**<sup>1</sup>H NMR** (500 MHz, CDCl<sub>3</sub>): δ = 2.29 (s, 6H, H-2''), 2.31 (s, 12H, H-1''), 3.94 (br s, 4H, H-4), 6.95 (s, 4H, H-3')

**<sup>13</sup>C NMR** (126 MHz, CDCl<sub>3</sub>): δ = 18.1 (C-1''), 21.1 (C-2''), 51.1 (C-4), 129.9 (C-3'), 135.1 (C-4'), 135.5 (C-1'), 138.8 (C-2') ppm. The <sup>13</sup>C-NMR resonance of C-2 could not be detected.

**HRMS** (APCI) for C<sub>23</sub>H<sub>29</sub>CuN<sub>3</sub><sup>+</sup> [(M-Cl)MeCN]<sup>+</sup>: calculated: 410.1657, found: 410.1649.

**IR** (ATR):  $\tilde{\nu}$  = 2909 (w), 1607 (w), 1485 (s), 1438 (m), 1315 (w), 1270 (s), 1189 (w), 1020 (w), 849 (s), 802 (w), 731 (w) cm<sup>-1</sup>.

**M.p.:** T = 205 °C.

The data is in accordance with literature.<sup>[21]</sup>

## 4.4 Conjugate reduction products

### 4.4.1 Ethyl 3-phenylbutanoate (**2**)

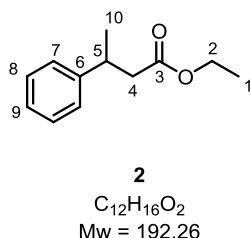

Prepared according to **GP2** from ethyl (*E*)-3-phenylbut-2-enoate (**1**, 95 mg, 0.50 mmol, 1.0 equiv), [SIMesCuCl] (**6**, 10 mg, 25 μmol, 5.0 mol%) and NaOtBu (14 mg, 0.15 mmol, 30 mol%) in 1,4-dioxane (2.0 mL). The reaction mixture was stirred for 16 h at 100 °C.

Purification by flash column chromatography on silica gel (cyclohexane/*tert*-butyl methyl ether = 30:1) yielded **2** as a colorless oil (68 mg, 0.35 mmol, 71%).

**R<sub>f</sub>** = 0.33 (SiO<sub>2</sub>, cyclohexane/*tert*-butyl methyl ether = 20:1).

**<sup>1</sup>H NMR** (500 MHz, CDCl<sub>3</sub>): δ = 1.18 (m<sub>c</sub>, 3H, H-1), 1.31 (d, <sup>3</sup>J<sub>10,5</sub> = 7.0 Hz, 3H, H-10), 2.58 (m<sub>c</sub>, 2H, H-4), 3.28 (m<sub>c</sub>, 1H, H-5), 4.08 (q, <sup>3</sup>J<sub>2,1</sub> = 7.1 Hz, 2H, H-2), 7.18–7.24 (m, 3H, H-7, H-8), 7.28–7.33 (m, 2H, H-9) ppm.

**<sup>13</sup>C NMR** (126 MHz, CDCl<sub>3</sub>): δ = 14.2 (C-1), 21.9 (C-10), 36.6 (C-5), 43.1 (C-4), 60.3 (C-2), 126.4 (C-7)\*, 126.8 (C-9)\*, 128.5 (C-8), 145.8 (C-6), 172.5 (C-3) ppm.

**HRMS** (APCI) for C<sub>12</sub>H<sub>17</sub>O<sub>2</sub><sup>+</sup> [(M+H)<sup>+</sup>] calculated: 193.1223, found: 193.1222.

The data is in accordance with literature.<sup>[22]</sup>

#### 4.4.2 Ethyl 3-(naphthalen-2-yl)butanoate (**9a**)

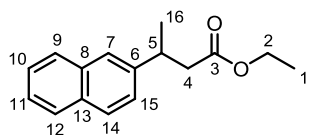

**9a**  
C<sub>16</sub>H<sub>18</sub>O<sub>2</sub>  
Mw = 242.32

Prepared according to **GP2** from ethyl (*E*)-3-(naphthalen-2-yl)but-2-enoate (**8a**, 60 mg, 0.25 mmol, 1.0 equiv), [SiMesCuCl] (**6**, 5.1 mg, 13 μmol, 5.0 mol%) and NaOtBu (7.2 mg, 75 μmol, 30 mol%) in 1,4-dioxane (1.5 mL). The reaction mixture was stirred for 16 h at 100 °C. Purification by flash column chromatography on silica gel (*n*-pentane/*tert*-butyl methyl ether = 50:1) yielded **9a** as a colorless oil (41.1 mg, 0.170 mmol, 68%).

$R_f = 0.45$  (SiO<sub>2</sub>, cyclohexane/*tert*-butyl methyl ether = 9:1).

**<sup>1</sup>H NMR** (500 MHz, CDCl<sub>3</sub>): δ = 1.16 (t, <sup>3</sup>J<sub>1,2</sub> = 7.1 Hz, 3H, H-1), 1.39 (d, <sup>3</sup>J<sub>16,5</sub> = 6.9 Hz, 3H, H-16), 2.67 (m<sub>c</sub>, 2H, H-4), 3.46 (m<sub>c</sub>, 1H, H-5), 4.07 (m<sub>c</sub>, 2H, H-2), 7.38 (dd, <sup>3</sup>J<sub>15,14</sub> = 8.4 Hz, <sup>4</sup>J<sub>15,7</sub> = 1.8 Hz, 1H, H-15), 7.44 (m<sub>c</sub>, 2H, H-10/H-11)\*, 7.65 (m<sub>c</sub>, 1H, H-7), 7.77–7.82 (m, 3H, H-9/H-12/H-14)\* ppm.

**<sup>13</sup>C NMR** (126 MHz, CDCl<sub>3</sub>): δ = 14.2 (C-1), 21.9 (C-16), 36.7 (C-5), 43.0 (C-4), 60.4 (C-2), 125.0 (C-7), 125.4 (C-10)\*, 125.6 (C-15), 126.0 (C-11)\*, 127.6 (C-9)\*, 127.7 (C-12)\*, 128.2 (C-14)\*, 132.4 (C-13), 133.6 (C-8), 143.3 (C-6), 172.4 (C-3) ppm.

**HRMS** (APCI) for C<sub>16</sub>H<sub>19</sub>O<sub>2</sub><sup>+</sup> [(M+H)<sup>+</sup>] calculated: 243.1380, found: 243.1374.

The data is in accordance with literature.<sup>[23]</sup>

#### 4.4.3 *tert*-Butyl 3-phenylbutanoate (**9b**)

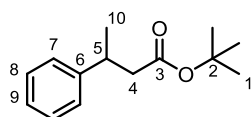

**9b**  
C<sub>14</sub>H<sub>20</sub>O<sub>2</sub>  
Mw = 220.31

Prepared according to **GP2** from *tert*-butyl (*E*)-3-phenylbut-2-enoate (**8b**, 55 mg, 0.25 mmol, 1.0 equiv), [SiMesCuCl] (**6**, 5.1 mg, 13 μmol, 5.0 mol%) and NaOtBu (7.2 mg, 75 μmol, 30 mol%) in 1,4-dioxane (1.5 mL). The reaction mixture was stirred for 16 h at 100 °C. Purification by flash column chromatography on silica gel (*n*-pentane/*tert*-butyl methyl ether = 50:1) yielded **9b** as a colorless oil (46 mg, 0.21 mmol, 84%).

$R_f = 0.65$  (SiO<sub>2</sub>, cyclohexane/*tert*-butyl methyl ether = 9:1).

**<sup>1</sup>H NMR** (500 MHz, CDCl<sub>3</sub>): δ = 1.28 (d, <sup>3</sup>J<sub>10,5</sub> = 7.0 Hz, 3H, H-10), 1.35 (s, 9H, H-1), 2.49 (m<sub>c</sub>, 2H, H-4), 3.22 (m<sub>c</sub>, 1H, H-5), 7.00–7.23 (m, 3H, H-7/H-9), 7.26–7.31 (m, 2H, H-8) ppm.

**<sup>13</sup>C NMR** (126 MHz, CDCl<sub>3</sub>): δ = 22.0 (C-10), 28.1 (C-1), 36.9 (C-5), 44.3 (C-4), 80.3 (C-2), 126.3 (C-9), 126.9 (C-7), 128.4 (C-8), 146.0 (C-6), 171.8 (C-3) ppm.

**HRMS** (EI) for C<sub>14</sub>H<sub>20</sub>O<sub>2</sub><sup>+</sup> [(M)<sup>+</sup>] calculated: 220.1457, found: 220.1467.

**IR** (ATR):  $\tilde{\nu} = 2969$  (w), 1724 (s), 1603 (w), 1452 (w), 1365 (m), 1255 (w), 1144 (s), 1082 (w), 1018 (m), 956 (m), 907 (w), 843 (m), 754 (m), 697 (s) cm<sup>-1</sup>.

#### 4.4.4 Ethyl 3,3-diphenylpropanoate (**9c**)

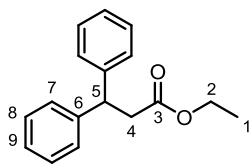

**9c**  
C<sub>17</sub>H<sub>18</sub>O<sub>2</sub>  
Mw = 254.33

Prepared according to **GP2** from ethyl 3,3-diphenylacrylate (**8c**, 63 mg, 0.25 mmol, 1.0 equiv), [SiMesCuCl] (**6**, 5.1 mg, 13 μmol, 5.0 mol%) and NaOtBu (7.2 mg, 75 μmol, 30 mol%) in 1,4-dioxane (1.5 mL). The reaction mixture was stirred for 16 h at 100 °C. Purification by flash column chromatography on silica gel (*n*-pentane/*tert*-butyl methyl ether = 50:1) yielded **9c** as a colorless oil (50.1 mg, 0.197 mmol, 79%).

$R_f = 0.45$  (SiO<sub>2</sub>, cyclohexane/*tert*-butyl methyl ether = 9:1).

**<sup>1</sup>H NMR** (500 MHz, CD<sub>2</sub>Cl<sub>2</sub>): δ = 1.11 (t, <sup>3</sup>J<sub>1,2</sub> = 7.1 Hz, 3H, H-1), 3.04 (d, <sup>3</sup>J<sub>4,5</sub> = 8.0 Hz, 2H, H-4), 4.01 (q, <sup>3</sup>J<sub>2,1</sub> = 7.1 Hz, 2H, H-2), 4.52 (t, <sup>3</sup>J<sub>5,4</sub> = 8.0 Hz, 1H, H-5), 7.16–7.21 (m, 2H, H-9), 7.22–7.31 (m, 8H, H-7/H-8) ppm.

**<sup>13</sup>C NMR** (126 MHz, CD<sub>2</sub>Cl<sub>2</sub>): δ = 14.2 (C-1), 40.9 (C-4), 47.4 (C-5), 60.7 (C-2), 126.8 (C-9), 128.0 (C-7), 128.9 (C-8), 144.2 (C-6), 171.9 (C-3) ppm.

**HRMS** (APCI) for C<sub>17</sub>H<sub>19</sub>O<sub>2</sub><sup>+</sup> [(M+H)<sup>+</sup>] calculated: 255.1380, found: 255.1374.

The data is in accordance with literature.<sup>[24]</sup>

#### 4.4.5 Ethyl 3-(4-methoxyphenyl)butanoate (**9d**)

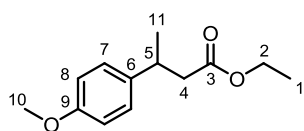

**9d**  
C<sub>13</sub>H<sub>18</sub>O<sub>3</sub>  
Mw = 222.28

Prepared according to **GP2** from ethyl (*E*)-3-(4-methoxyphenyl)but-2-enoate (**8d**, 55 mg, 0.25 mmol, 1.0 equiv), [SiMesCuCl] (**6**, 5.1 mg, 13 μmol, 5.0 mol%) and NaOtBu (7.2 mg, 75 μmol, 30 mol%) in 1,4-dioxane (1.5 mL). The reaction mixture was stirred for 16 h at 100 °C. Purification by flash column chromatography on silica gel (*n*-pentane/*tert*-butyl methyl ether = 30:1) yielded **9d** as a colorless oil (42.4 mg, 0.191 mmol, 76%).

$R_f = 0.30$  (SiO<sub>2</sub>, cyclohexane/*tert*-butyl methyl ether = 9:1).

**<sup>1</sup>H NMR** (500 MHz, CDCl<sub>3</sub>): δ = 1.18 (t, <sup>3</sup>J<sub>1,2</sub> = 7.1 Hz, 3H, H-1), 1.27 (d, <sup>3</sup>J<sub>11,5</sub> = 7.0 Hz, 3H, H-11), 2.53 (m<sub>c</sub>, 2H, H-4), 3.23 (m<sub>c</sub>, 1H, H-5), 3.78 (s, 3H, H-10), 4.07 (m<sub>c</sub>, 2H, H-2), 6.83 (m<sub>c</sub>, 2H, H-8), 7.14 (m<sub>c</sub>, 2H, H-7) ppm.

**<sup>13</sup>C NMR** (126 MHz, CDCl<sub>3</sub>): δ = 14.3 (C-1), 22.1 (C-11), 35.8 (C-5), 43.3 (C-4), 55.3 (C-10), 60.3 (C-2), 113.9 (C-8), 127.7 (C-7), 138.0 (C-6), 158.2 (C-9), 172.5 (C-3) ppm.

**HRMS** (APCI) for C<sub>13</sub>H<sub>19</sub>O<sub>3</sub><sup>+</sup> [(M+H)<sup>+</sup>] calculated: 223.1329, found: 223.1324.

The data is in accordance with literature.<sup>[25,26]</sup>

#### 4.4.6 Ethyl 3-(4-(trifluoromethyl)phenyl)butanoate (9e)

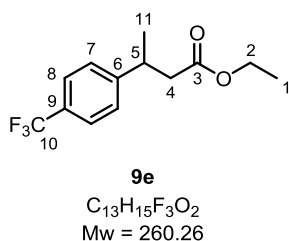

Prepared according to **GP2** from ethyl (*E*)-3-(4-(trifluoromethyl)phenyl)but-2-enoate (**8e**, 64 mg, 0.25 mmol, 1.0 equiv), [SiMesCuCl] (**6**, 5.1 mg, 13 μmol, 5.0 mol%) and NaOtBu (7.2 mg, 75 μmol, 30 mol%) in 1,4-dioxane (1.5 mL). The reaction mixture was stirred for 16 h at 100 °C. Purification by flash column chromatography on silica gel (*n*-pentane/*tert*-butyl methyl ether = 50:1) yielded **9e** as a colorless oil (41.4 mg, 0.159 mmol, 64%).

$R_f = 0.45$  (SiO<sub>2</sub>, cyclohexane/*tert*-butyl methyl ether = 9:1).

<sup>1</sup>H NMR (500 MHz, CDCl<sub>3</sub>): δ = 1.17 (t, <sup>3</sup>J<sub>1,2</sub> = 7.1 Hz, 3H, H-1), 1.31 (d, <sup>3</sup>J<sub>10,5</sub> = 7.0 Hz, 3H, H-10), 2.59 (m<sub>c</sub>, 2H, H-4), 3.34 (m<sub>c</sub>, 1H, H-5), 4.07 (m<sub>c</sub>, 2H, H-2), 7.33 (d, <sup>3</sup>J<sub>7,8</sub> = 8.2 Hz, 2H, H-7), 7.41 (d, <sup>3</sup>J<sub>8,7</sub> = 8.3 Hz, 2H, H-8) ppm.

<sup>13</sup>C NMR (126 MHz, CDCl<sub>3</sub>): δ = 14.2 (C-1), 21.8 (C-11), 36.5 (C-5), 42.6 (C-4), 60.5 (C-2), 124.4 (q, <sup>1</sup>J<sub>10,F</sub> = 271.5 Hz, C-10), 125.5 (q, <sup>3</sup>J<sub>8,F</sub> = 3.6 Hz, C-8), 127.3 (C-7), 128.8 (q, <sup>2</sup>J<sub>9,F</sub> = 32.2 Hz, C-9), 149.8 (C-6), 172.0 (C-3) ppm.

<sup>19</sup>F NMR (659 MHz, CDCl<sub>3</sub>): δ = -62.4 ppm.

HRMS (APCI) for C<sub>13</sub>H<sub>16</sub>F<sub>3</sub>O<sub>2</sub><sup>+</sup> [(M+H)<sup>+</sup>] calculated: 261.1097, found: 261.1090.

IR (ATR):  $\tilde{\nu} = 2970$  (w), 1731 (s), 1618 (m), 1457 (w), 1419 (w), 1371 (w), 1322 (s), 1268 (w), 1160 (s), 1112 (s), 1066 (s), 1015 (m), 953 (w), 838 (s), 712 (w) cm<sup>-1</sup>.

The <sup>1</sup>H and <sup>13</sup>C NMR data is in accordance with literature.<sup>[27]</sup>

#### 4.4.7 Ethyl 3-(4-bromophenyl)butanoate (9f)

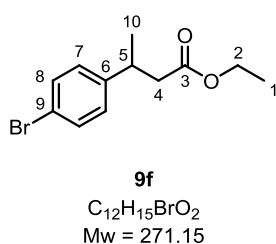

Prepared according to **GP2** from ethyl (*E*)-3-(4-bromophenyl)but-2-enoate (**8f**, 67 mg, 0.25 mmol, 1.0 equiv), [SiMesCuCl] (**6**, 5.1 mg, 13 μmol, 5.0 mol%) and NaOtBu (7.2 mg, 75 μmol, 30 mol%) in 1,4-dioxane (1.5 mL). The reaction mixture was stirred for 16 h at 100 °C. Purification by flash column chromatography on silica gel (*n*-pentane/*tert*-butyl methyl ether = 50:1) yielded **9f** as a colorless oil (57.9 mg, 0.214 mmol, 85%).

$R_f = 0.48$  (SiO<sub>2</sub>, cyclohexane/*tert*-butyl methyl ether = 9:1).

<sup>1</sup>H NMR (500 MHz, CDCl<sub>3</sub>): δ = 1.18 (t, <sup>3</sup>J<sub>1,2</sub> = 7.1 Hz, 3H, H-1), 1.27 (d, <sup>3</sup>J<sub>10,5</sub> = 6.9 Hz, 3H, H-10), 2.54 (m<sub>c</sub>, 2H, H-4), 3.24 (m<sub>c</sub>, 1H, H-5), 4.07 (m<sub>c</sub>, 2H, H-2), 7.09 (m<sub>c</sub>, 2H, H-7), 7.41 (m<sub>c</sub>, 2H, H-8) ppm.

<sup>13</sup>C NMR (126 MHz, CDCl<sub>3</sub>): δ = 14.2 (C-1), 21.9 (C-10), 36.1 (C-5), 42.8 (C-4), 60.4 (C-2), 120.1 (C-9), 128.7 (C-7), 131.6 (C-8), 144.8 (C-6), 172.1 (C-3) ppm.

**HRMS** (APCI) for  $C_{12}H_{16}^{79}BrO_2^+$  [(M+H)<sup>+</sup>] calculated: 271.0328, found: 271.0323.

**IR** (ATR):  $\tilde{\nu}$  = 2966 (w), 1729 (s), 1488 (m), 1455 (w), 1406 (w), 1369 (m), 1260 (m), 1160 (s), 1071 (m), 1031 (m), 949 (w), 821 (s), 762 (w), 716 (w)  $cm^{-1}$ .

The <sup>1</sup>H and <sup>13</sup>C NMR data is in accordance with literature.<sup>[28]</sup>

#### 4.4.8 Ethyl 3-(4-chlorophenyl)butanoate (9g)

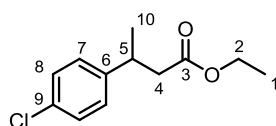

**9g**  
 $C_{12}H_{15}ClO_2$   
Mw = 226.70

Prepared according to **GP2** from ethyl (*E*)-3-(4-chlorophenyl)but-2-enoate (**8g**, 56 mg, 0.25 mmol, 1.0 equiv), [SImesCuCl] (**6**, 5.1 mg, 13  $\mu$ mol, 5.0 mol%) and NaOtBu (7.2 mg, 75  $\mu$ mol, 30 mol%) in 1,4-dioxane (1.5 mL). The reaction mixture was stirred for 16 h at 100 °C. Purification by flash column chromatography on silica gel (*n*-pentane/*tert*-butyl methyl ether = 50:1) yielded **9g** as a colorless oil

(37 mg, 0.16 mmol, 65%).

$R_f$  = 0.52 (SiO<sub>2</sub>, cyclohexane/*tert*-butyl methyl ether = 9:1).

**<sup>1</sup>H NMR** (500 MHz, CDCl<sub>3</sub>):  $\delta$  = 1.17 (t, <sup>3</sup> $J_{1,2}$  = 7.1 Hz, 3H, H-1), 1.27 (d, <sup>3</sup> $J_{10,5}$  = 7.0 Hz, 3H, H-10), 2.54 (m<sub>c</sub>, 2H, H-4), 3.25 (m<sub>c</sub>, 1H, H-5), 4.06 (m<sub>c</sub>, 2H, H-2), 7.15 (m<sub>c</sub>, 2H, H-7), 7.25 (m<sub>c</sub>, 2H, H-8) ppm.

**<sup>13</sup>C NMR** (126 MHz, CDCl<sub>3</sub>):  $\delta$  = 14.2 (C-1), 21.9 (C-10), 36.0 (C-5), 42.9 (C-4), 60.4 (C-2), 128.3 (C-7), 128.7 (C-8), 132.1 (C-9), 144.3 (C-6), 172.2 (C-3) ppm.

**HRMS** (APCI) for  $C_{12}H_{16}^{35}ClO_2^+$  [(M+H)<sup>+</sup>] calculated: 227.0833, found: 227.0828.

**IR** (ATR):  $\tilde{\nu}$  = 2965 (w), 2115 (w), 1729 (s), 1492 (m), 1457 (w), 1410 (w), 1369 (m), 1259 (m), 1161 (s), 1093 (s), 1032 (s), 950 (w), 825 (s), 732 (w)  $cm^{-1}$ .

#### 4.4.9 Ethyl 3-(*o*-tolyl)butanoate (9h)

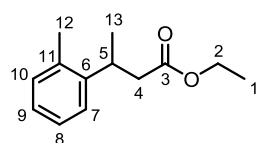

**9h**  
 $C_{13}H_{18}O_2$   
Mw = 206.28

Prepared according to **GP2** from ethyl (*E*)-3-(*o*-tolyl)but-2-enoate (**8h**, 51 mg, 0.25 mmol, 1.0 equiv), [SImesCuCl] (**6**, 10.2 mg, 25.0  $\mu$ mol, 10.0 mol%) and NaOtBu (7.2 mg, 75  $\mu$ mol, 30 mol%) in 1,4-dioxane (1.5 mL). The reaction mixture was stirred for 16 h at 100 °C.

Purification by flash column chromatography on silica gel (*n*-pentane/*tert*-butyl methyl ether = 50:1) yielded **9h** as a colorless oil (90% conversion, 28.6 mg, 0.138 mmol, 55%).

$R_f$  = 0.60 (SiO<sub>2</sub>, cyclohexane/*tert*-butyl methyl ether = 9:1).

**<sup>1</sup>H NMR** (500 MHz, CDCl<sub>3</sub>):  $\delta$  = 1.18 (t, <sup>3</sup> $J_{1,2}$  = 6.9 Hz, 3H, H-1), 1.25 (d, <sup>3</sup> $J_{13,4}$  = 6.9 Hz, 3H, H-13), 2.37 (s, 3H, H-12), 2.57 (m<sub>c</sub>, 2H, H-4), 3.53 (m<sub>c</sub>, 1H, H-5), 4.08 (q, <sup>3</sup> $J_{2,1}$  = 7.1 Hz, 2H, H-2), 7.06–7.21 (m, 4H, H-7/H-8/H-9/H-10) ppm.

$^{13}\text{C}$  NMR (126 MHz,  $\text{CDCl}_3$ ):  $\delta$  = 14.2 (C-1), 19.5 (C-12), 21.4 (C-13), 31.6 (C-5), 42.3 (C-4), 60.3 (C-2), 125.1 (C-7), 126.1 (C-8)\*, 126.3 (C-9)\*, 130.5 (C-10), 135.4 (C-11), 144.0 (C-6), 172.6 (C-3) ppm.

HRMS (APCI) for  $\text{C}_{13}\text{H}_{19}\text{O}_2^+$  [(M+H) $^+$ ] calculated: 207.1380, found: 207.1379.

The data is in accordance with literature.<sup>[26]</sup>

#### 4.4.10 Ethyl 3-(4-nitrophenyl)butanoate (9i)

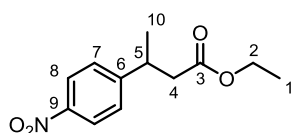

**9i**  
 $\text{C}_{12}\text{H}_{15}\text{NO}_4$   
Mw = 237.25

Prepared according to **GP2** from ethyl (*E*)-3-(4-nitrophenyl)but-2-enoate (**8i**, 58 mg, 0.25 mmol, 1.0 equiv), [SIMesCuCl] (**6**, 5.1 mg, 13  $\mu\text{mol}$ , 5.0 mol%) and NaOtBu (7.2 mg, 75  $\mu\text{mol}$ , 30 mol%) in 1,4-dioxane (1.5 mL). The reaction mixture was stirred for 16 h at 100  $^\circ\text{C}$ . No conversion could be observed in  $^1\text{H}$  NMR, GC and GC-MS.

#### Crude $^1\text{H}$ NMR of conjugate reduction of 8i

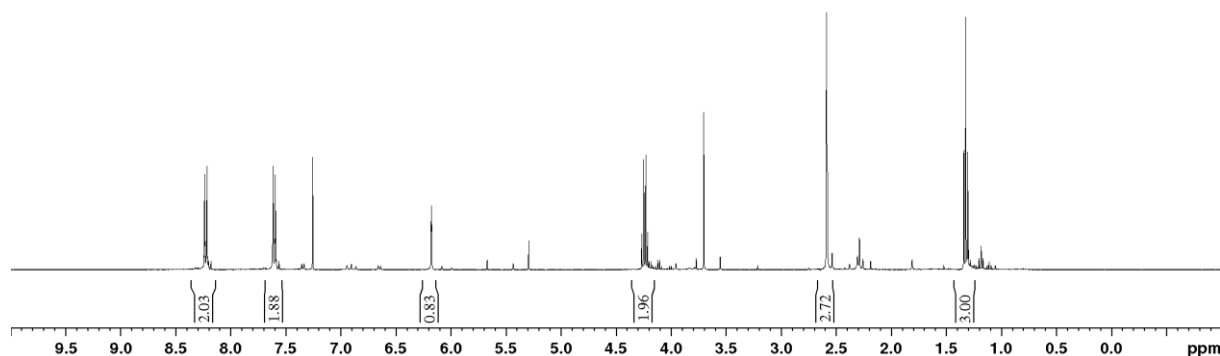

#### GC of conjugate reduction of 8i



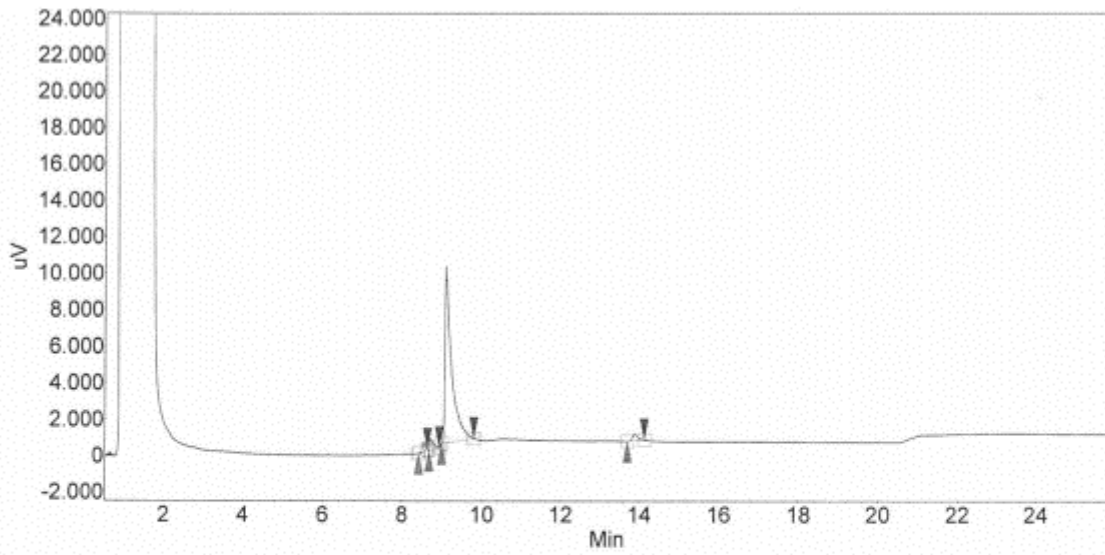

**Peak results :**

| Index | Name    | Time [Min] | Quantity [% Area] | Height [uV] | Area [uV Min] | Area % [%] |
|-------|---------|------------|-------------------|-------------|---------------|------------|
| 1     | UNKNOWN | 8.55       | 1.41              | 501.9       | 27.9          | 1.414      |
| 2     | UNKNOWN | 8.72       | 3.43              | 603.6       | 67.6          | 3.429      |
| 3     | UNKNOWN | 9.09       | 92.05             | 9660.2      | 1814.8        | 92.054     |
| 4     | UNKNOWN | 13.88      | 3.10              | 358.0       | 61.2          | 3.104      |
| Total |         |            | 100.00            | 11133.7     | 1971.5        | 100.000    |

## GC/MS of conjugate reduction of 8i

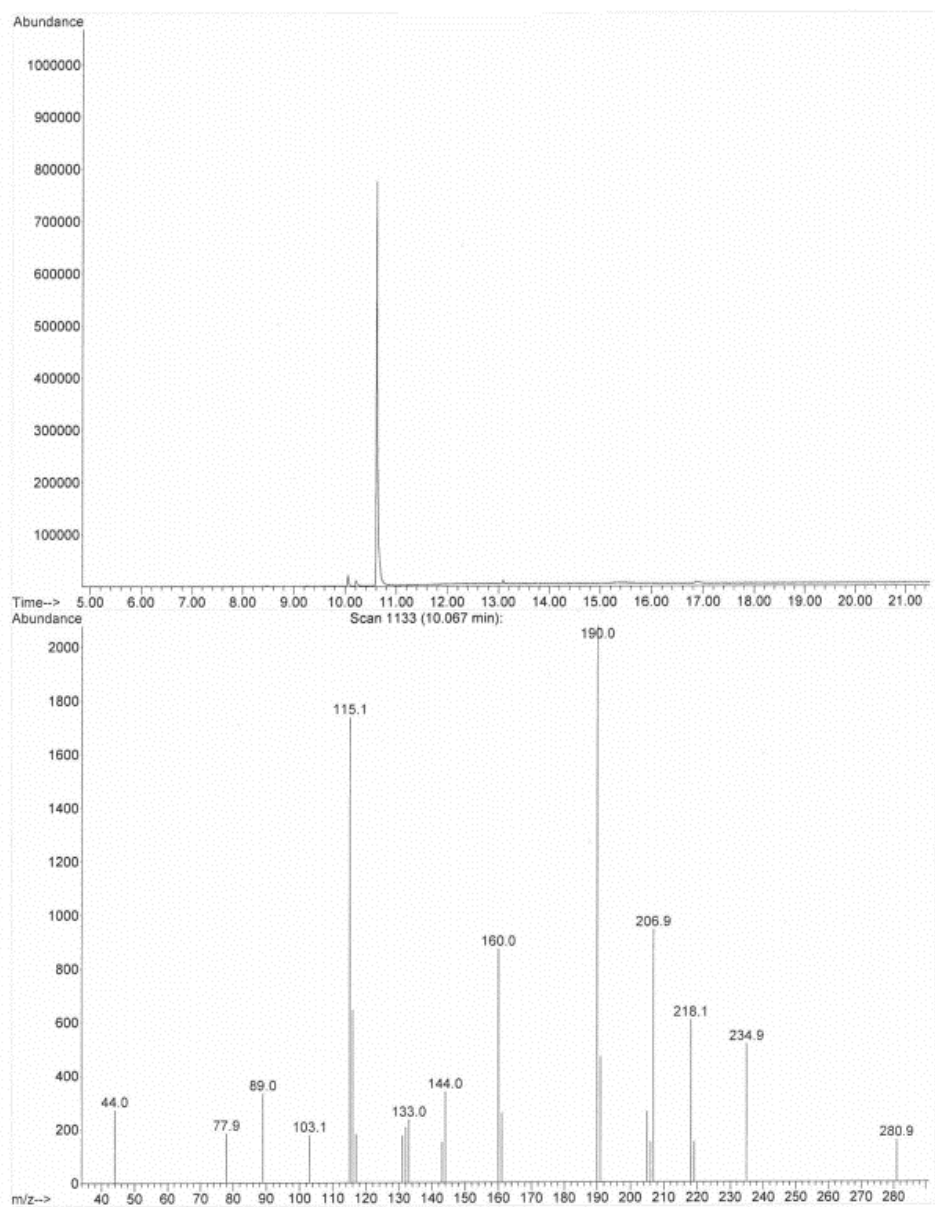

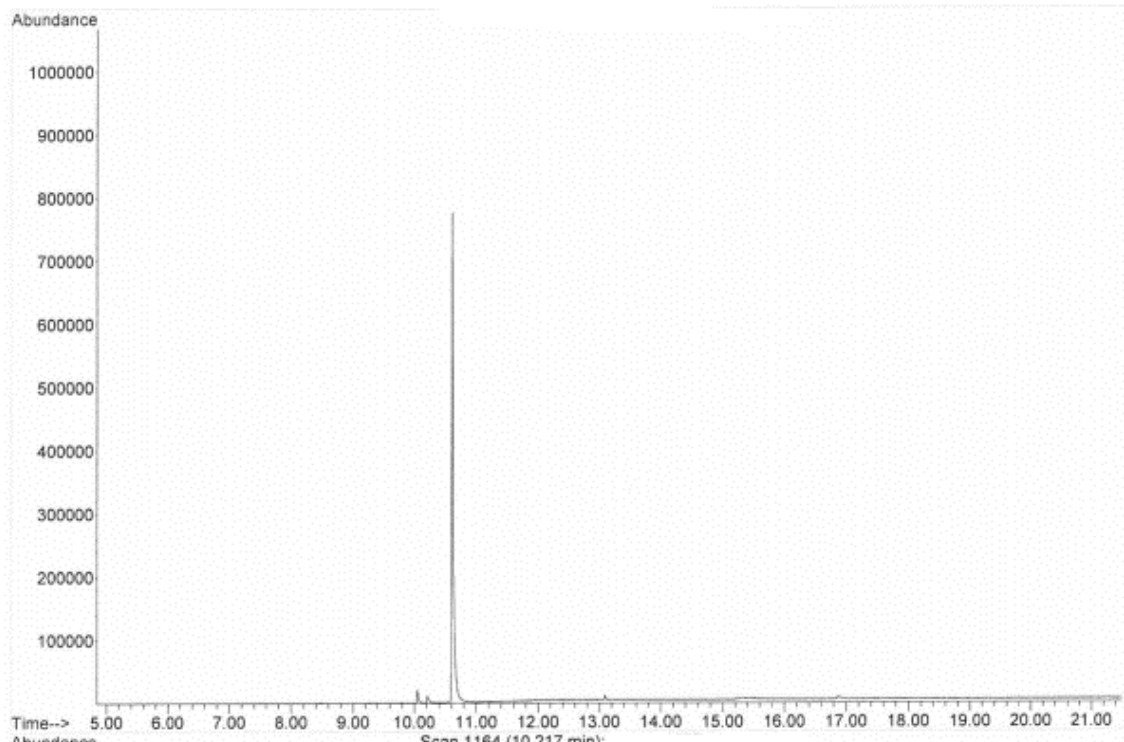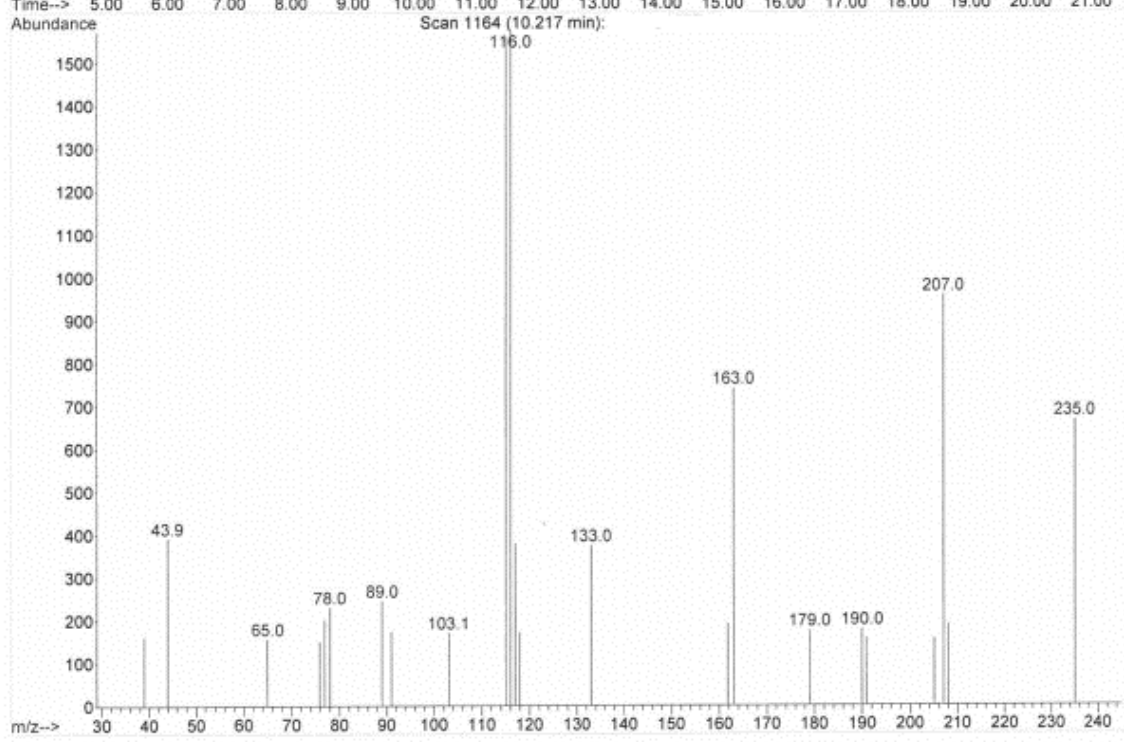

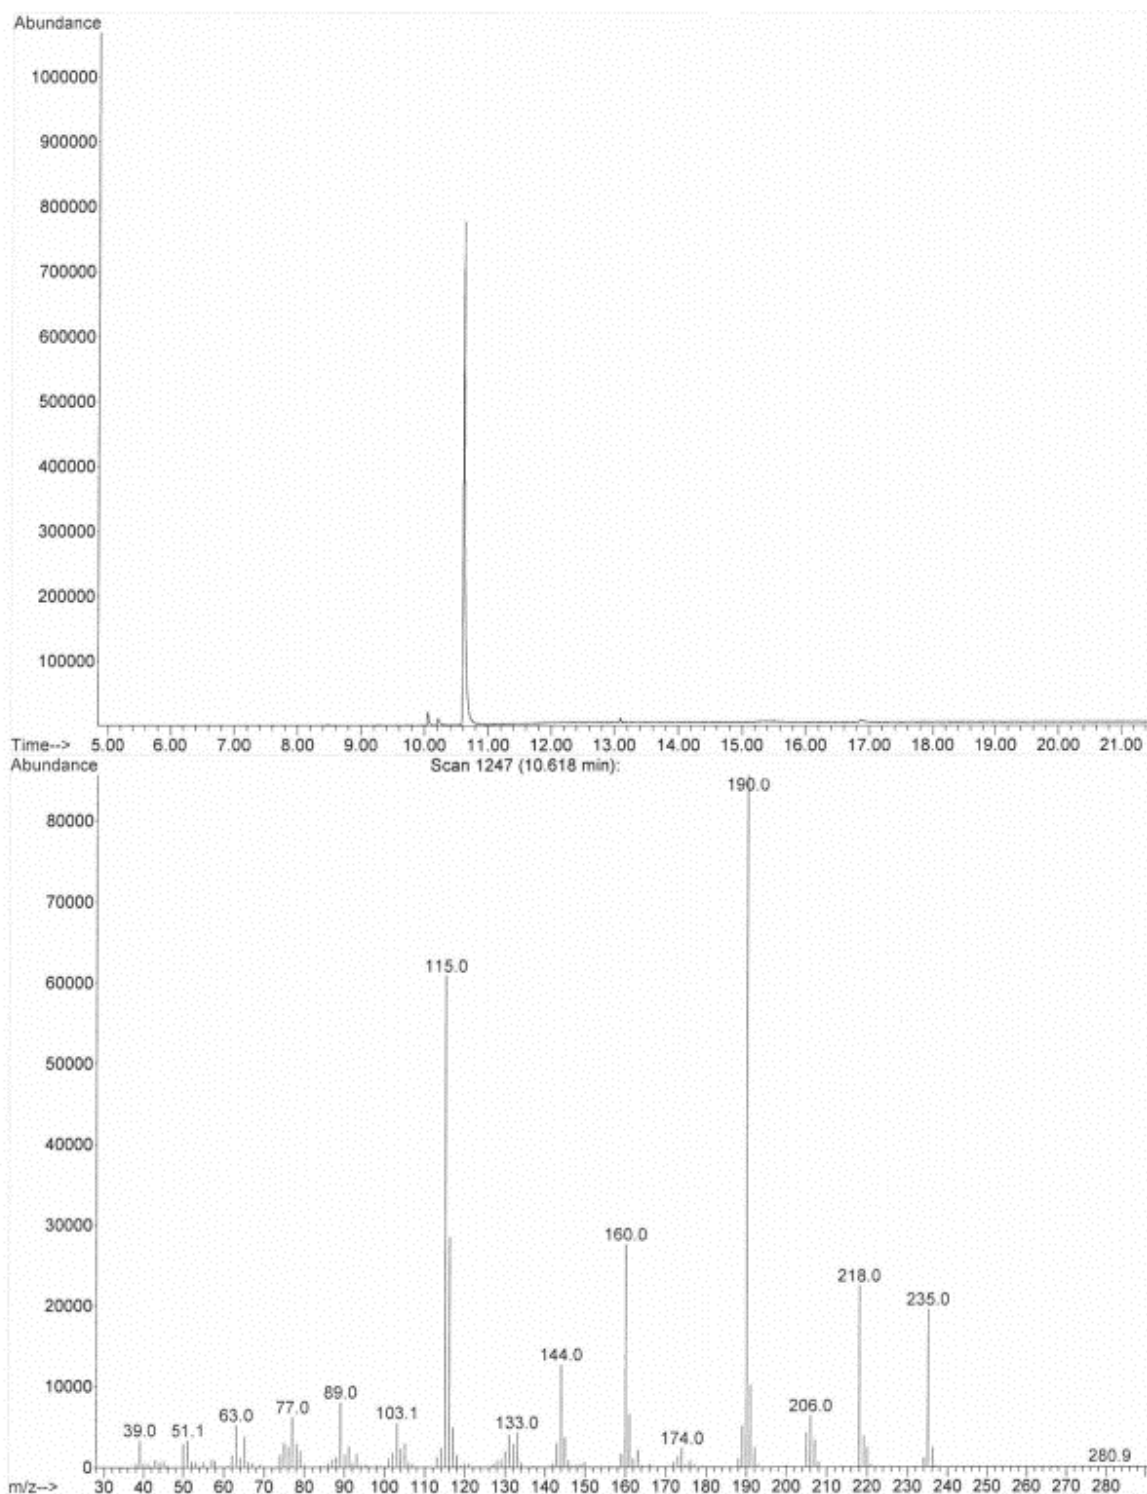

#### 4.4.11 Ethyl 3-(4-cyanophenyl)butanoate (**9j**)

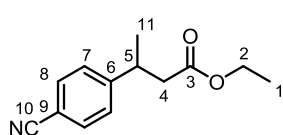

**9j**  
 $C_{13}H_{15}NO_2$   
 Mw = 217.26

Prepared according to **GP2** from ethyl (*E*)-3-(4-cyanophenyl)but-2-enoate (**8j**), 54 mg, 0.25 mmol, 1.0 equiv), [SiMesCuCl] (**6**, 5.1 mg, 13  $\mu$ mol, 5.0 mol%) and NaOtBu (7.2 mg, 75  $\mu$ mol, 30 mol%) in 1,4-dioxane (1.5 mL). The reaction mixture was stirred for 16 h at 100 °C. Purification by flash column chromatography on silica gel (*n*-

pentane/*tert*-butyl methyl ether = 15:1) yielded **9j** as a colorless oil (9.8 mg, 45  $\mu$ mol, 5%).

$R_f$  = 0.30 (SiO<sub>2</sub>, cyclohexane/*tert*-butyl methyl ether = 4:1).

<sup>1</sup>H NMR (500 MHz, CDCl<sub>3</sub>):  $\delta$  = 1.17 (t, <sup>3</sup>J<sub>1,2</sub> = 7.1 Hz, 3H, H-1), 1.30 (d, <sup>3</sup>J<sub>11,5</sub> = 7.0 Hz, 3H, H-11), 2.58 (m<sub>c</sub>, 2H, H-4), 3.33 (m<sub>c</sub>, 1H, H-5), 4.06 (m<sub>c</sub>, 2H, H-2), 7.33 (m<sub>c</sub>, 2H, H-7), 7.59 (m<sub>c</sub>, 2H, H-8) ppm.

<sup>13</sup>C NMR (126 MHz, CDCl<sub>3</sub>):  $\delta$  = 14.2 (C-1), 21.7 (C-11), 36.7 (C-5), 42.4 (C-4), 60.6 (C-2), 110.5 (C-9), 119.0 (C-10), 127.8 (C-7), 132.5 (C-8), 151.3 (C-6), 171.8 (C-3) ppm.

HRMS (APCI) for C<sub>13</sub>H<sub>15</sub>NO<sub>2</sub><sup>+</sup> [(M+H)<sup>+</sup>] calculated: 218.1176, found: 218.1182.

IR (ATR):  $\tilde{\nu}$  = 2972 (w), 2227 (m), 1732 (s), 1608 (w), 1505 (w), 1457 (w), 1416 (w), 1371 (w), 1266 (w), 1174 (m), 1116 (w), 1033 (w), 838 (w) cm<sup>-1</sup>.

#### 4.4.12 Ethyl 3-(4-acetylphenyl)butanoate (**9k**)

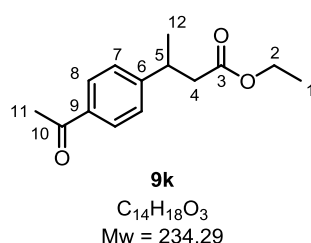

Prepared according to **GP2** from ethyl (*E*)-3-(4-acetylphenyl)but-2-enoate (**8k**, 58 mg, 0.25 mmol, 1.0 equiv), [SiMesCuCl] (**6**, 5.1 mg, 13  $\mu$ mol, 5.0 mol%) and NaOtBu (7.2 mg, 75  $\mu$ mol, 30 mol%) in 1,4-dioxane (1.5 mL). The reaction mixture was stirred for 16 h at 100 °C. No conversion could be observed in <sup>1</sup>H NMR, GC and GC-MS.

#### Crude <sup>1</sup>H NMR of conjugate reduction of **8k**

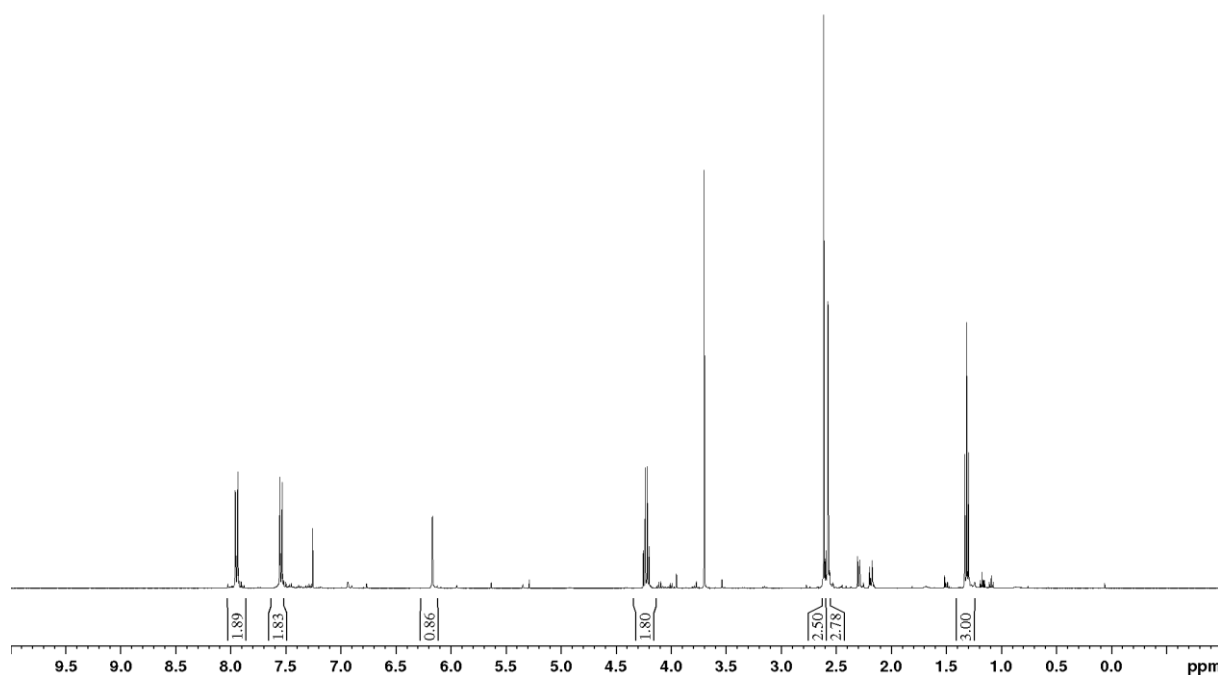

## GC of conjugate reduction of 8k

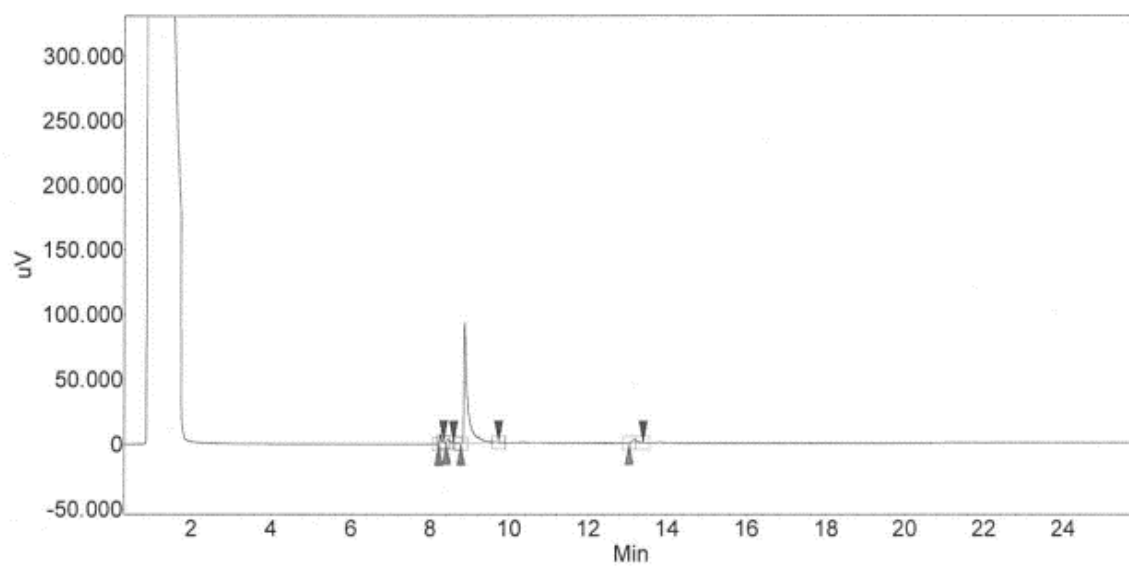

### Peak results :

| Index | Name    | Time [Min] | Quantity [% Area] | Height [uV] | Area [uV.Min] | Area % [%] |
|-------|---------|------------|-------------------|-------------|---------------|------------|
| 4     | UNKNOWN | 8,25       | 3,52              | 7526,1      | 391,2         | 3,524      |
| 3     | UNKNOWN | 8,44       | 2,05              | 3136,5      | 227,9         | 2,053      |
| 2     | UNKNOWN | 8,87       | 90,95             | 92915,4     | 10097,6       | 90,953     |
| 1     | UNKNOWN | 13,16      | 3,47              | 2677,6      | 385,3         | 3,470      |
| Total |         |            | 100,00            | 106255,6    | 11101,9       | 100,000    |

# GC/MS data of conjugate reduction of 8k

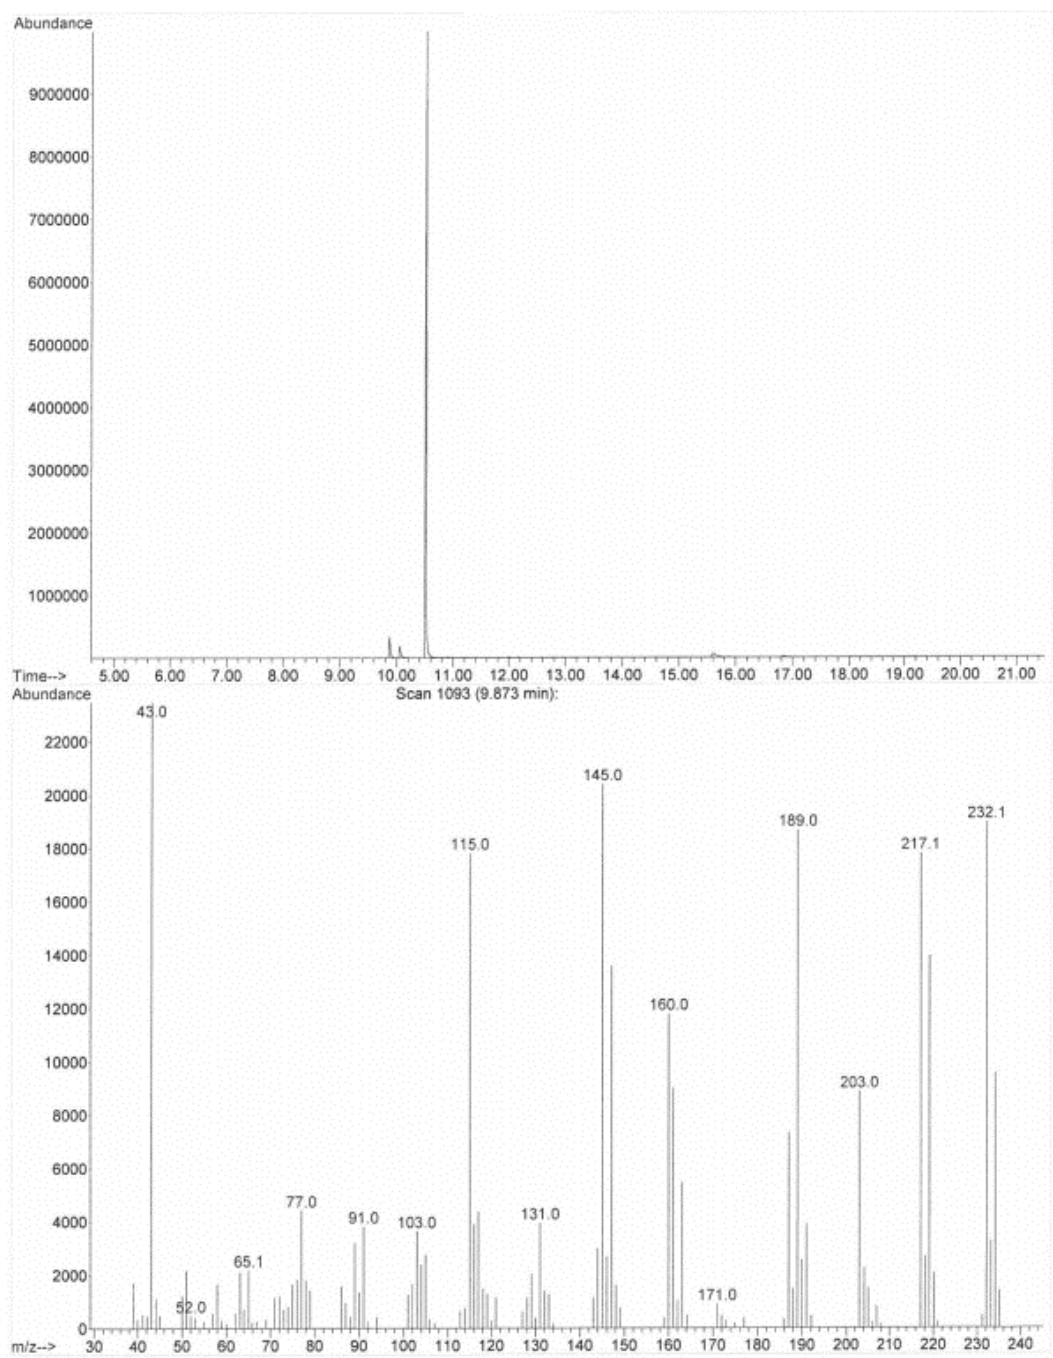

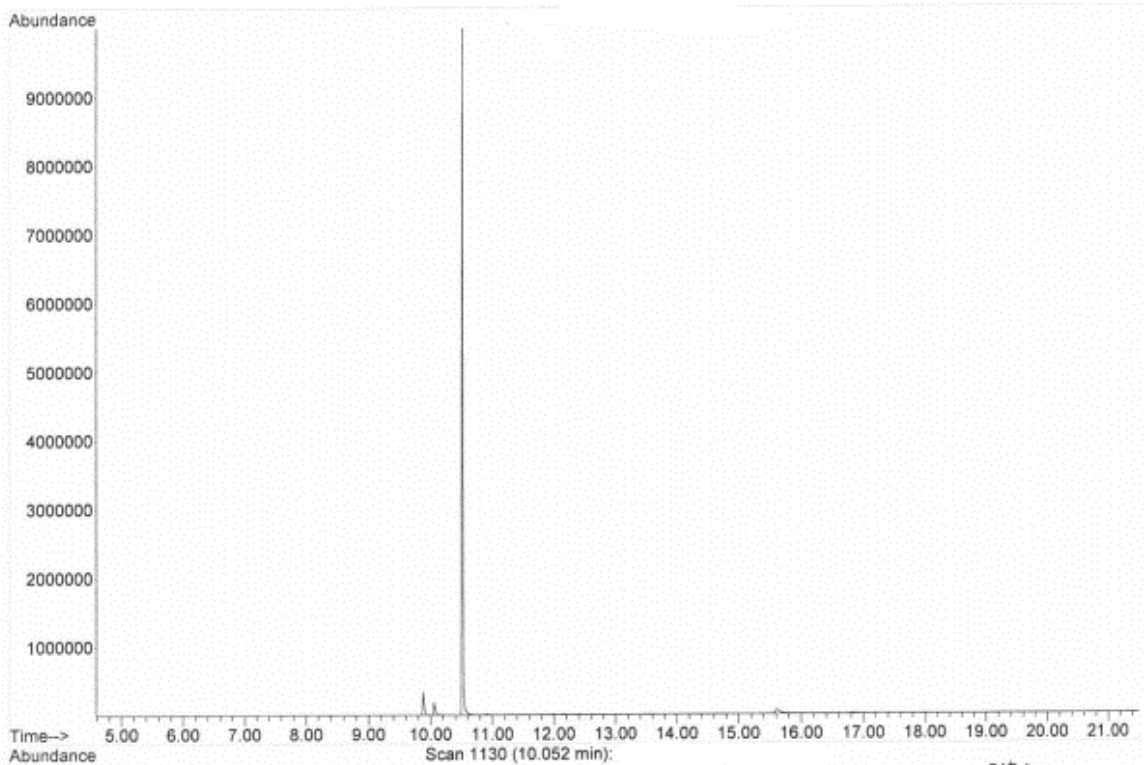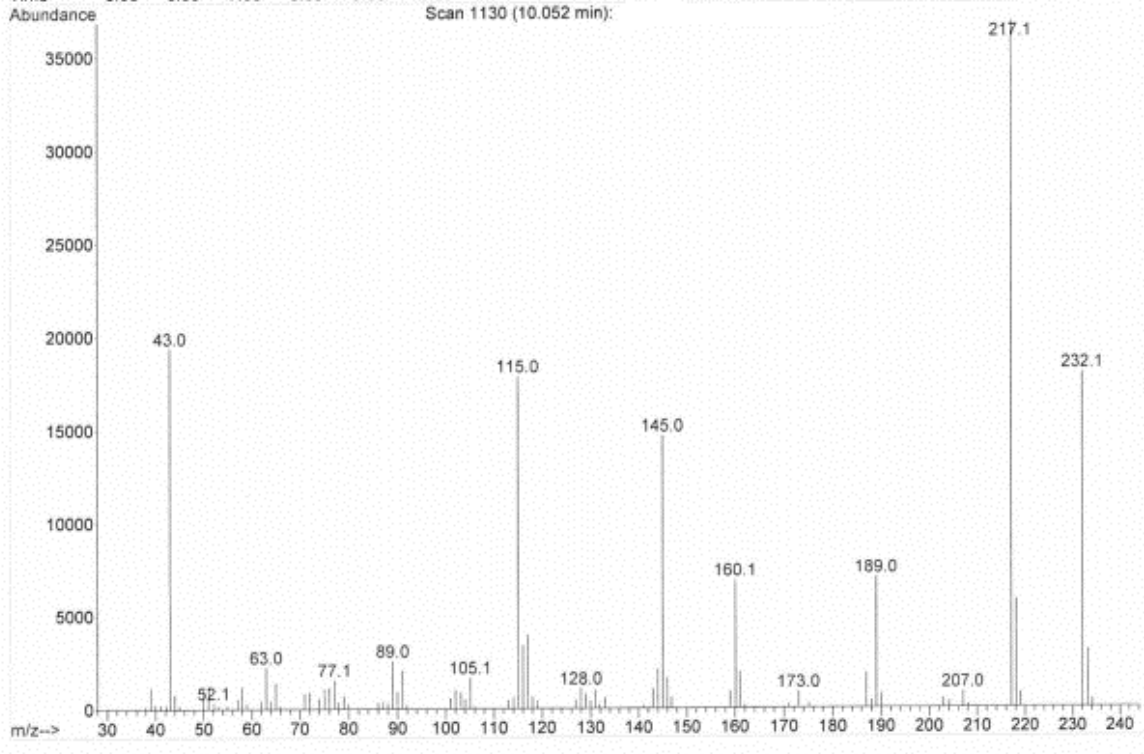



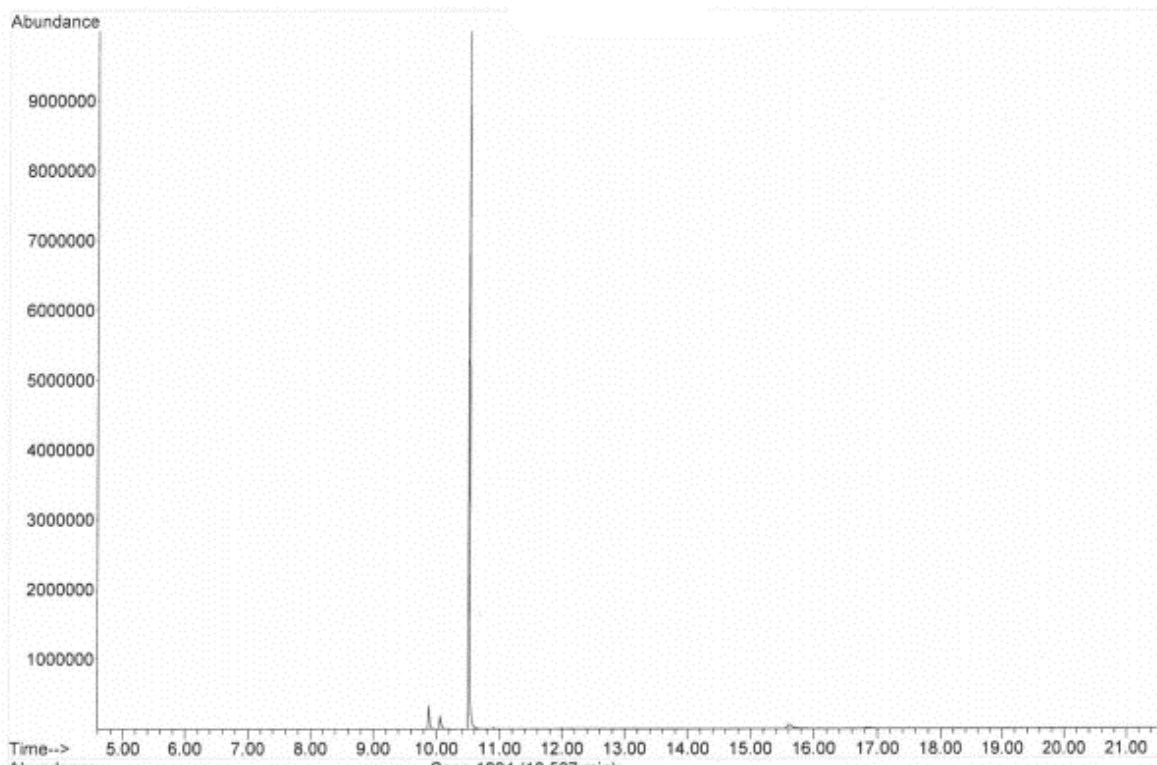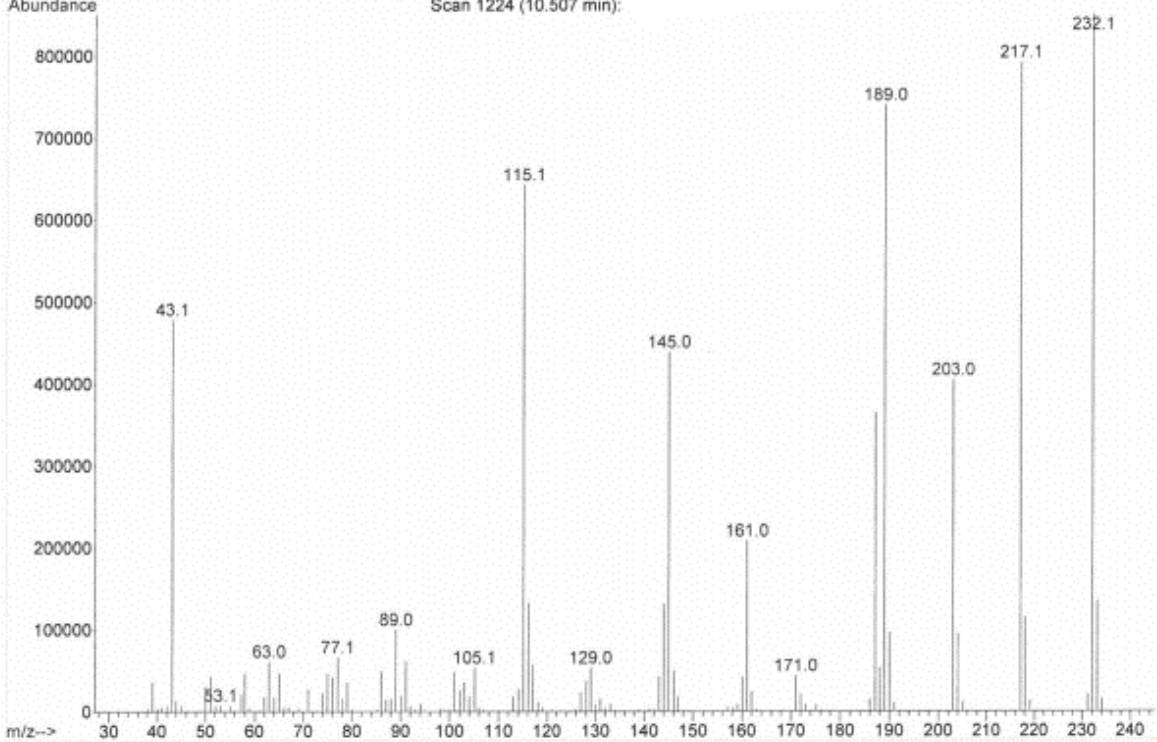

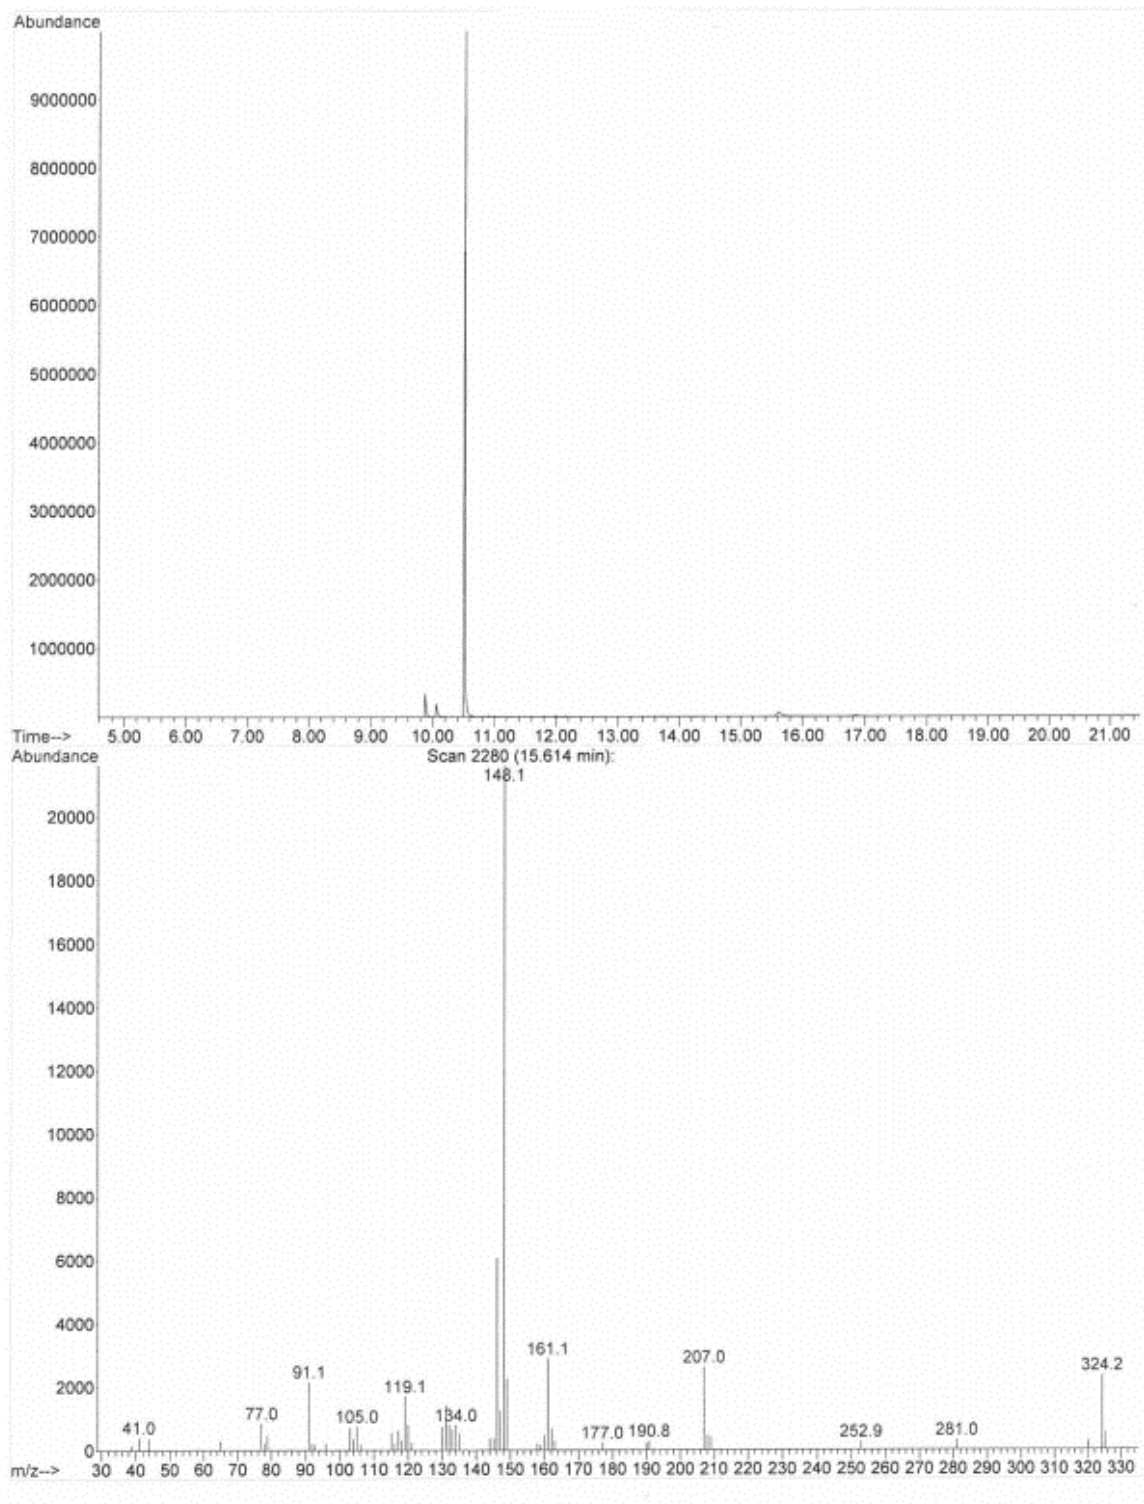

#### 4.4.13 Ethyl 3-(4-hydroxyphenyl)butanoate (**9I**)

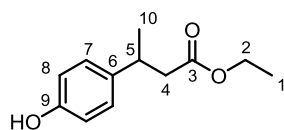

**9I**  
 $C_{12}H_{16}O_3$   
 Mw = 208.25

Prepared according to **GP2** from ethyl (*E*)-3-(4-hydroxyphenyl)but-2-enoate (**8I**, 45 mg, 0.22 mmol, 1.0 equiv), [SiMesCuCl] (**6**, 5.1 mg, 13  $\mu$ mol, 6.0 mol%) and NaOtBu (7.2 mg, 75  $\mu$ mol, 34 mol%) in 1,4-dioxane (1.5 mL). The reaction mixture was stirred for 16 h at 100 °C. Purification by flash column chromatography on silica gel (*n*-

pentane/*tert*-butyl methyl ether = 10:1) yielded **9I** as a colorless oil (conv. 81%, 21.3 mg, 0.102 mmol, 47%).

$R_f = 0.44$  (SiO<sub>2</sub>, cyclohexane/*tert*-butyl methyl ether = 4:1).

<sup>1</sup>H NMR (500 MHz, CDCl<sub>3</sub>):  $\delta = 1.18$  (t, <sup>3</sup> $J_{1,2} = 7.1$  Hz, 3H, H-1), 1.26 (d, <sup>3</sup> $J_{11,5} = 6.9$  Hz, 3H, H-11), 2.53 (m<sub>c</sub>, 2H, H-4), 3.22 (m<sub>c</sub>, 1H, H-5), 4.07 (m<sub>c</sub>, 2H, H-2), 4.82 (s, 1H, OH), 6.74 (m<sub>c</sub>, 2H, H-8), 7.08 (m<sub>c</sub>, 2H, H-7) ppm.

The <sup>1</sup>H NMR spectra still contains 9% of the starting material.

<sup>13</sup>C NMR (126 MHz, CDCl<sub>3</sub>):  $\delta = 14.3$  (C-1), 22.1 (C-10), 35.9 (C-5), 43.4 (C-4), 60.4 (C-2), 115.3 (C-8), 128.0 (C-7), 138.0 (C-6), 154.1 (C-9), 172.7 (C-3) ppm.

HRMS (APCI) for C<sub>12</sub>H<sub>17</sub>O<sub>3</sub><sup>+</sup> [(M+H)<sup>+</sup>] calculated: 209.1172, found: 209.1169.

IR (ATR):  $\tilde{\nu} = 3349$  (m), 2965 (w), 1704 (s), 1613 (m), 1515 (s), 1444 (m), 1371 (m), 1266 (m), 1219 (m), 1174 (m), 1109 (w), 1032 (m), 833 (s) cm<sup>-1</sup>.

#### 4.4.14 Ethyl 3-(4-((*tert*-butyldiphenylsilyl)oxy)phenyl)butanoate (**9m-OEt**) and *tert*-butyl 3-(4-((*tert*-butyldiphenylsilyl)oxy)phenyl)butanoate (**9m-OtBu**)

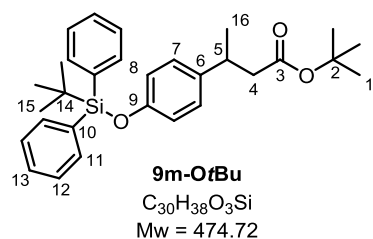

Prepared according to **GP2** from diethyl ethyl (*E*)-3-(4-((*tert*-butyldiphenylsilyl)oxy)phenyl)but-2-enoate (104 mg, 0.250 mmol, 1.00 equiv), [SiMesCuCl] (**6**, 10.2 mg, 25.0  $\mu$ mol, 10.0 mol%) and NaOtBu (14 mg, 0.15 mmol, 60 mol%) in 1,4-dioxane (1.5 mL). The reaction mixture was stirred for 16 h at 100 °C. A crude reaction mixture of the product **9m-OEt** and

*tert*-butyl 3-(4-((*tert*-butyldiphenylsilyl)oxy)phenyl)butanoate (**9m-OtBu**) as a side product (**9m-OEt**/**9m-OtBu** = 83:17) was obtained. Purification by flash column chromatography on silica gel (*n*-pentane/*tert*-butyl methyl ether = 100:1) yielded **9m-OEt** as a colorless oil (44.9 mg, 0.101 mmol, 40%) and **9m-OtBu** as a colorless oil (8.6 mg, 0.018 mmol, 7%).

#### Ethyl 3-(4-((*tert*-butyldiphenylsilyl)oxy)phenyl)butanoate (**9m-OEt**):

$R_f = 0.37$  (SiO<sub>2</sub>, cyclohexane/*tert*-butyl methyl ether = 9:1).

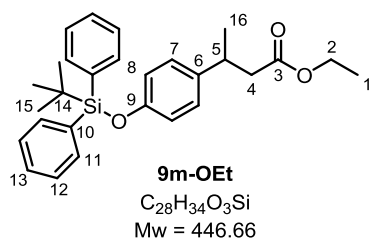

<sup>1</sup>H NMR (500 MHz, CDCl<sub>3</sub>):  $\delta = 1.08$  (s, 9H, H-15), 1.39 (t, <sup>3</sup> $J_{1,2} = 7.1$  Hz, 3H, H-1), 1.21 (d, <sup>3</sup> $J_{16,5} = 6.9$  Hz, 3H, H-16), 2.46 (m<sub>c</sub>, 2H, H-4), 3.14 (m<sub>c</sub>, 1H, H-5), 4.03 (q, <sup>3</sup> $J_{2,1} = 7.1$  Hz, 2H, H-2), 6.68 (m<sub>c</sub>, 2H, H-8), 6.92 (m<sub>c</sub>, 2H, H-7), 7.32–7.37 (m, 4H, H-12), 7.39–7.43 (m, 2H, H-13), 7.67–7.73 (m, 4H, H-11) ppm.

**<sup>13</sup>C NMR** (126 MHz, CDCl<sub>3</sub>): δ = 14.3 (C-1), 19.6 (C-14), 21.9 (C-16), 26.6 (C-15), 35.9 (C-5), 43.4 (C-4), 60.2 (C-2), 119.6 (C-8), 127.5 (C-7), 127.8 (C-12), 129.9 (C-13), 133.2 (C-10), 135.6 (C-11), 138.3 (C-6), 154.0 (C-9), 172.6 (C-3) ppm.

**<sup>29</sup>SI DEPT NMR** (99MHz, *J* = 20 Hz, CDCl<sub>3</sub>): δ = -6.6 ppm.

**HRMS** (APCI) for C<sub>18</sub>H<sub>27</sub>O<sub>4</sub><sup>+</sup> [(M+H)<sup>+</sup>] calculated: 447.2350, found: 447.2343.

**IR** (ATR):  $\tilde{\nu}$  = 2930 (m), 2856 (w), 1731 (s), 1606 (m), 1509 (s), 1471 (w), 1427 (m), 1367 (w), 1252 (s), 1160 (m), 1107 (s), 1032 (w), 916 (s), 832 (m), 779 (w), 740 (m), 698 (s) cm<sup>-1</sup>.

#### ***tert*-Butyl 3-(4-((*tert*-butyldiphenylsilyl)oxy)phenyl)butanoate (9m-O*t*Bu):**

*R<sub>f</sub>* = 0.47 (SiO<sub>2</sub>, cyclohexane/*tert*-butyl methyl ether = 9:1).

**<sup>1</sup>H NMR** (500 MHz, CDCl<sub>3</sub>): δ = 1.08 (s, 9H, H-15), 1.19 (d, <sup>3</sup>*J*<sub>16,5</sub> = 7.0 Hz, 3H, H-16), 1.31 (s, 9H, H-1), 2.38 (m<sub>c</sub>, 2H, H-4), 3.09 (m<sub>c</sub>, 1H, H-5), 6.68 (m<sub>c</sub>, 2H, H-8), 6.93 (m<sub>c</sub>, 2H, H-7), 7.32–7.38 (m, 4H, H-12), 7.38–7.44 (m, 2H, H-13), 7.69–7.72 (m, 4H, H-11) ppm.

**<sup>13</sup>C NMR** (126 MHz, CDCl<sub>3</sub>): δ = 19.6 (C-14), 22.1 (C-16), 26.6 (C-15), 28.1 (C-1), 36.1 (C-5), 44.5 (C-4), 80.1 (C-2), 119.5 (C-8), 127.6 (C-7), 127.8 (C-12), 129.9 (C-13), 133.2 (C-10), 135.6 (C-11), 138.4 (C-6), 154.0 (C-9), 171.9 (C-1) ppm.

**<sup>29</sup>SI DEPT NMR** (99MHz, *J* = 20 Hz, CDCl<sub>3</sub>): δ = -6.7 ppm.

**HRMS** (APCI) for C<sub>20</sub>H<sub>25</sub>O<sub>3</sub><sup>+</sup> [(M+H-Ph-*t*Bu)<sup>+</sup>] calculated: 341.1567, found: 341.1569.

**IR** (ATR):  $\tilde{\nu}$  2960 (m), 2857 (w), 1727 (s), 1607 (w), 1509 (s), 1472 (w), 1427 (w), 1365 (w), 1255 (s), 1148 (m), 1110 (m), 1011 (w), 920 (m), 834 (m), 779 (w), 741 (w), 701 (s) cm<sup>-1</sup>.

#### **4.4.15 Ethyl 3-(4-(dimethylamino)phenyl)butanoate (9n)**

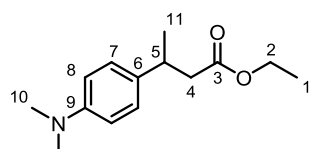

**9n**  
C<sub>14</sub>H<sub>21</sub>NO<sub>2</sub>  
Mw = 235.32

Prepared according to **GP2** from ethyl (1)-3-(4-(dimethylamino)phenyl)but-2-enoate (**8n**, 61 mg, 0.25 mmol, 1.0 equiv), [SiMesCuCl] (**6**, 5.1 mg, 13 μmol, 5.0 mol%) and NaO*t*Bu (7.2 mg, 75 μmol, 30 mol%) in 1,4-dioxane (1.5 mL). The reaction mixture was stirred for 16 h at 100 °C. Purification by flash column chromatography on silica gel (*n*-pentane/*tert*-butyl methyl ether = 50:1) yielded **9n** as a colorless oil (38.1 mg, 0.162 mmol, 65%).

*R<sub>f</sub>* = 0.16 (SiO<sub>2</sub>, cyclohexane/*tert*-butyl methyl ether = 9:1).

**<sup>1</sup>H NMR** (500 MHz, CDCl<sub>3</sub>): δ = 1.20 (t, <sup>3</sup>*J*<sub>1,2</sub> = 7.1 Hz, 3H, H-1), 1.26 (d, <sup>3</sup>*J*<sub>11,5</sub> = 6.9 Hz, 2H, H-11), 2.52 (m<sub>c</sub>, 2H, H-4), 2.91 (s, 6H, H-10), 3.19 (m<sub>c</sub>, 1H, H-5), 4.08 (m<sub>c</sub>, 2H, H-2), 6.69 (m<sub>c</sub>, 2H, H-8), 7.10 (m<sub>c</sub>, 2H, H-7) ppm.

**<sup>13</sup>C NMR** (126 MHz, CDCl<sub>3</sub>): δ = 14.3 (C-1), 22.0 (C-11), 35.6 (C-5), 40.9 (C-10), 43.5 (C-4), 60.2 (C-2), 113.0 (C-8), 127.4 (C-7), 134.0 (C-6), 149.4 (C-9), 172.8 (C-3) ppm.

**HRMS** (APCI) for C<sub>14</sub>H<sub>22</sub>NO<sub>2</sub><sup>+</sup> [(M+H)<sup>+</sup>] calculated: 236.1645, found: 236.1640.

The data is in accordance with literature.<sup>[6]</sup>

#### 4.4.16 Ethyl 3-(thiophen-2-yl)butanoate (**9o**)

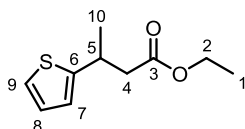

**9o**  
C<sub>10</sub>H<sub>14</sub>O<sub>2</sub>S  
Mw = 198.28

Prepared according to **GP2** from ethyl (*E*)-3-(thiophen-2-yl)but-2-enoate (**8o**, 49 mg, 0.25 mmol, 1.0 equiv), [SImesCuCl] (**6**, 5.1 mg, 13 μmol, 5.0 mol%) and NaOtBu (7.2 mg, 75 μmol, 30 mol%) in 1,4-dioxane (1.5 mL). The reaction mixture was stirred for 16 h at 100 °C. Purification by flash column chromatography on silica gel (*n*-pentane/*tert*-butyl methyl ether = 30:1) yielded **9o** as a colorless oil (38.8 mg, 0.196 mmol, 78%).

$R_f$  = 0.55 (SiO<sub>2</sub>, cyclohexane/*tert*-butyl methyl ether = 9:1).

<sup>1</sup>H NMR (500 MHz, CDCl<sub>3</sub>): δ = 1.22 (t, <sup>3</sup>J<sub>1,2</sub> = 7.1 Hz, 3H, H-1), 1.38 (d, <sup>3</sup>J<sub>10,5</sub> = 6.9 Hz, 3H, H-10), 2.61 (m<sub>c</sub>, 2H, H-4), 3.59 (m<sub>c</sub>, 1H, H-5), 4.12 (q, <sup>3</sup>J<sub>2,1</sub> = 7.1 Hz, 2H, H-2), 6.83 (m<sub>c</sub>, 1H, H-7), 6.91 (dd, <sup>3</sup>J<sub>8,7</sub> = 5.1 Hz, <sup>3</sup>J<sub>8,9</sub> = 5.1 Hz, 1H, H-8), 7.13 (dd, <sup>3</sup>J<sub>9,8</sub> = 5.1 Hz, <sup>4</sup>J<sub>9,7</sub> = 1.1 Hz, 1H, H-9) ppm.

<sup>13</sup>C NMR (126 MHz, CDCl<sub>3</sub>): δ = 14.3 (C-1), 22.7 (C-10), 32.1 (C-5), 44.0 (C-4), 60.5 (C-2), 123.0 (C-7), 123.0 (C-8), 126.7 (C-9), 149.8 (C-6), 172.0 (C-3) ppm.

HRMS (APCI) for C<sub>10</sub>H<sub>15</sub>O<sub>2</sub>S<sup>+</sup> [(M+H)<sup>+</sup>] calculated: 199.0787, found: 199.0782.

IR (ATR):  $\tilde{\nu}$  = 2971 (w), 1729 (s), 1456 (w), 1369 (m), 1344 (w), 1280 (m), 1248 (m), 1160 (m), 1071 (w), 1028 (m), 947 (w), 848 (m), 691 (s) cm<sup>-1</sup>.

The <sup>1</sup>H NMR data is in accordance with literature.<sup>[29]</sup>

#### 4.4.17 Ethyl 3-cyclopropyl-3-phenylpropanoate (**9p**)

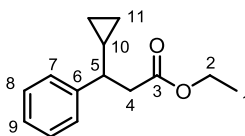

**9p**  
C<sub>14</sub>H<sub>18</sub>O<sub>2</sub>  
Mw = 218.30

Prepared according to **GP2** from ethyl (*E*)-3-cyclopropyl-3-phenylacrylate (**8p**, 54 mg, 0.25 mmol, 1.0 equiv), [SImesCuCl] (**6**, 5.1 mg, 13 μmol, 5.0 mol%) and NaOtBu (7.2 mg, 75 μmol, 30 mol%) in 1,4-dioxane (1.5 mL). The reaction mixture was stirred for 16 h at 100 °C. Purification by flash column chromatography on silica gel (*n*-pentane/*tert*-butyl methyl ether = 50:1) yielded **9p** as a colorless oil (52.0 mg, 0.238 mmol, 95%).

$R_f$  = 0.52 (SiO<sub>2</sub>, cyclohexane/*tert*-butyl methyl ether = 9:1).

<sup>1</sup>H NMR (500 MHz, CDCl<sub>3</sub>): δ = 0.14 (m<sub>c</sub>, 1H, H-11<sub>α</sub>)<sup>\*</sup>, 0.27 (m<sub>c</sub>, 1H, H-11'<sub>α</sub>)<sup>\*</sup>, 0.41 (m<sub>c</sub>, 1H, H-11<sub>β</sub>)<sup>\*</sup>, 0.57 (m<sub>c</sub>, 1H, H-11'<sub>β</sub>), 1.03 (m<sub>c</sub>, 1H, H-10), 1.15 (t, <sup>3</sup>J<sub>1,2</sub> = 7.1 Hz, 3H, H-1), 2.37 (m<sub>c</sub>,

1H, H-5), 2.73 (m<sub>c</sub>, 2H, H-4), 4.04 (m<sub>c</sub>, 2H, H-2), 7.18–7.25 (m, 3H, H-7/H-9), 7.26–7.32 (m, 2H, H-8) ppm.

<sup>13</sup>C NMR (126 MHz, CDCl<sub>3</sub>): δ = 4.1 (C-11)\*, 5.4 (C-11')\*, 14.2 (C-1), 17.2 (C-10), 41.9 (C-4), 47.3 (C-5), 60.3 (C-2), 126.5 (C-9), 127.4 (C-7), 128.4 (C-8), 144.2 (C-6), 172.5 (C-3) ppm.

HRMS (APCI) for C<sub>14</sub>H<sub>19</sub>O<sub>2</sub><sup>+</sup> [(M+H)<sup>+</sup>] calculated: 219.1380, found: 219.1372.

The data is in accordance with literature.<sup>[30]</sup>

#### 4.4.18 Hex-5-en-1-yl 3-phenylbutanoate (9q)

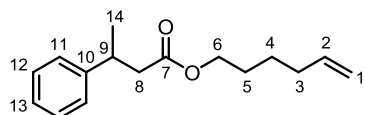

**9q**  
C<sub>16</sub>H<sub>22</sub>O<sub>2</sub>  
Mw = 246.35

Prepared according to **GP2** from hex-5-en-1-yl (*E*)-3-phenylbut-2-enoate (**8q**, 61 mg, 0.25 mmol, 1.0 equiv), [SiMesCuCl] (**6**, 5.1 mg, 13 μmol, 5.0 mol%) and NaOtBu (7.2 mg, 75 μmol, 30 mol%) in 1,4-dioxane (1.5 mL). The reaction mixture was stirred for 16 h at 100 °C. Purification by flash column chromatography on silica gel (*n*-pentane/*tert*-butyl methyl ether = 50:1) yielded **9q** as a colorless oil (40.9 mg, 0.166 mmol, 66%).

R<sub>f</sub> = 0.53 (SiO<sub>2</sub>, cyclohexane/*tert*-butyl methyl ether = 9:1).

<sup>1</sup>H NMR (500 MHz, CDCl<sub>3</sub>): δ = 1.17 (d, <sup>3</sup>J<sub>14,9</sub> = 7.0 Hz, 3H, H-14), 1.19–1.27 (m, 2H, H-4), 1.38–1.46 (m, 2H, H-5), 1.90 (m<sub>c</sub>, 2H, H-3), 2.45 (m<sub>c</sub>, 2H, H-8), 3.14 (m<sub>c</sub>, 1H, H-9), 3.88 (d, <sup>3</sup>J<sub>6,5</sub> = 6.6 Hz, 2H, H-6), 4.82 (m<sub>c</sub>, 1H, H-1<sub>Z</sub>), 4.86 (m<sub>c</sub>, 1H, H-1<sub>E</sub>), 5.63 (m<sub>c</sub>, 1H, H-2), 7.03–7.11 (m, 3H, H-11/H-13), 7.13–7.19 (m, 2H, H-12) ppm.

<sup>13</sup>C NMR (126 MHz, CDCl<sub>3</sub>): δ = 22.0 (C-14), 25.7 (C-4), 28.1 (C-5), 33.3 (C-3), 36.7 (C-9), 43.1 (C-8), 64.3 (C-6), 114.9 (C-1), 126.5 (C-13), 126.8 (C-11), 128.6 (C-12), 138.4 (C-2), 145.8 (C-10), 172.6 (C-3) ppm.

HRMS (APCI) for C<sub>16</sub>H<sub>13</sub>O<sub>2</sub><sup>+</sup> [(M+H)<sup>+</sup>] calculated: 247.1693, found: 247.1690.

IR (ATR):  $\tilde{\nu}$  = 2930 (w), 1730 (s), 1639 (w), 1602 (w), 1452 (w), 1265 (m), 1162 (m), 1082 (m), 993 (m), 909 (m), 760 (m), 698 (s) cm<sup>-1</sup>.

#### 4.4.19 Diethyl 3,3'-(1,4-phenylene)dibutyrate (9r)

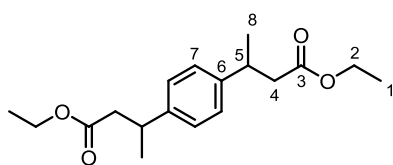

**9r**  
C<sub>18</sub>H<sub>26</sub>O<sub>4</sub>  
Mw = 306.40

Prepared according to **GP2** from diethyl 3,3'-(1,4-phenylene)(*2E,2'E*)-bis(but-2-enoate) (**8k**, 76 mg, 0.25 mmol, 1.0 equiv), [SiMesCuCl] (**6**, 10.2 mg, 25.0 μmol, 10.0 mol%) and NaOtBu (14 mg, 0.15 mmol, 60 mol%) in 1,4-dioxane (1.5 mL). The reaction mixture was stirred for 16 h at 100 °C. Purification by flash column chromatography on silica gel (*n*-pentane/*tert*-butyl methyl ether = 25:2) yielded **9r** as a colorless oil (47.9 mg, 0.156 mmol, 62%).

$R_f = 0.31$  (SiO<sub>2</sub>, cyclohexane/*tert*-butyl methyl ether = 9:1).

<sup>1</sup>H NMR (500 MHz, CDCl<sub>3</sub>):  $\delta = 1.17$  (t, <sup>3</sup> $J_{1,2} = 7.1$  Hz, 6H, H-1), 1.27 (d, <sup>3</sup> $J_{8,4} = 6.9$  Hz, 6H, H-8), 2.54 (m<sub>c</sub>, 4H, H-4), 3.24 (m<sub>c</sub>, 2H, H-5), 4.07 (q, <sup>3</sup> $J_{2,1} = 7.1$  Hz, 4H, H-2), 7.14 (s, 4H, H-7) ppm.

<sup>13</sup>C NMR (126 MHz, CDCl<sub>3</sub>):  $\delta = 14.3$  (C-1), 21.8 (C-8), 36.2 (C-5), 43.1 (C-4), 60.3 (C-2), 126.9 (C-7), 143.8 (C-6), 172.5 (C-3) ppm.

HRMS (APCI) for C<sub>18</sub>H<sub>27</sub>O<sub>4</sub><sup>+</sup> [(M+H)<sup>+</sup>] calculated: 307.1904, found: 307.1903.

IR (ATR):  $\tilde{\nu} = 2964$  (w), 1729 (s), 1510 (w), 1456 (w), 1369 (m), 1264 (m), 1158 (s), 1095 (w), 1032 (s), 949 (w), 831 (m), 721 (w) cm<sup>-1</sup>.

#### 4.4.20 Ethyl 2-methyl-3-phenylbutanoate (**9s**)

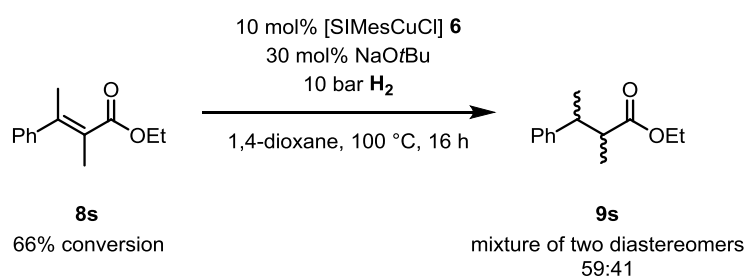

Prepared according to **GP2** from ethyl (*E*)-2-methyl-3-phenylbut-2-enoate (**8s**, 51 mg, 0.25 mmol, 1.0 equiv), [SiMesCuCl] (**6**, 10.2 mg, 25.0  $\mu$ mol, 10.0 mol%) and NaOtBu (7.2 mg, 75  $\mu$ mol, 30 mol%) in 1,4-dioxane (1.5 mL). The reaction mixture was stirred for 16 h at 100 °C. Purification by flash column chromatography on silica gel (*n*-pentane/Et<sub>2</sub>O = 50:1) yielded **9** as a colorless oil (66% conversion, 37 mg combined yield of *E*-**8s**, *Z*-**8s**, *syn*-**9s** and *anti*-**9s**).

$R_f = 0.59$  (SiO<sub>2</sub>, cyclohexane/*tert*-butyl methyl ether = 9:1).

##### Major diastereomer:

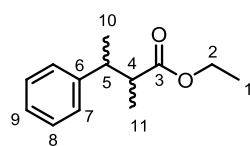

**9s**  
C<sub>13</sub>H<sub>18</sub>O<sub>2</sub>  
Mw = 206.28

<sup>1</sup>H NMR (500 MHz, CDCl<sub>3</sub>):  $\delta = 0.93$  (d, <sup>3</sup> $J_{11,4} = 6.9$  Hz, 3H, H-11), 1.23–1.27 (m, 2H, H-10), 1.28 (t, <sup>3</sup> $J_{1,2} = 7.1$  Hz, 3H, H-1), 2.57 (m<sub>c</sub>, 1H, H-4), 2.89 (m<sub>c</sub>, 1H, H-5), 4.18 (m<sub>c</sub>, 2H, H-2), 7.11–7.23 (m, 3H, H-7/H-9)\*, 7.26–7.41 (m, 2H, H-8)\* ppm.

##### Minor diastereomer:

<sup>1</sup>H NMR (500 MHz, CDCl<sub>3</sub>):  $\delta = 1.01$  (t, <sup>3</sup> $J_{1,2} = 7.1$  Hz, 3H, H-1), 1.17 (d, <sup>3</sup> $J_{11,4} = 6.9$  Hz, 3H, H-11), 1.23–1.27 (m, 2H, H-10), 2.64 (m<sub>c</sub>, 1H, H-4), 3.03 (m<sub>c</sub>, 1H, H-5), 3.91 (m<sub>c</sub>, 2H, H-2), 7.11–7.23 (m, 3H, H-7/H-9)\*, 7.26–7.41 (m, 2H, H-8)\* ppm.

Integrated signals in <sup>1</sup>H NMR which are not further listed belong to the starting material (*E*-**8s**) and its isomer (*Z*-**8s**). Due to overlaying signals, <sup>13</sup>C signals have not been correlated.

For **MS** see following GC/MS data.





# <sup>1</sup>H NMR of 9s

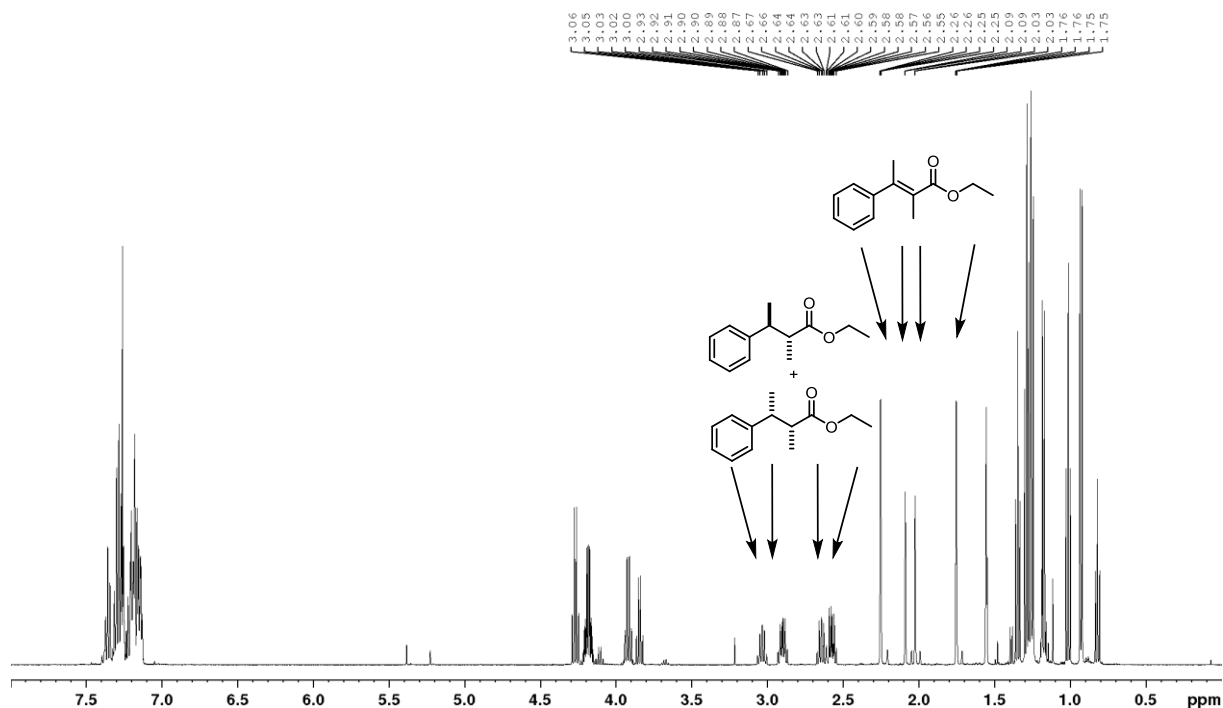

# GC of 9s

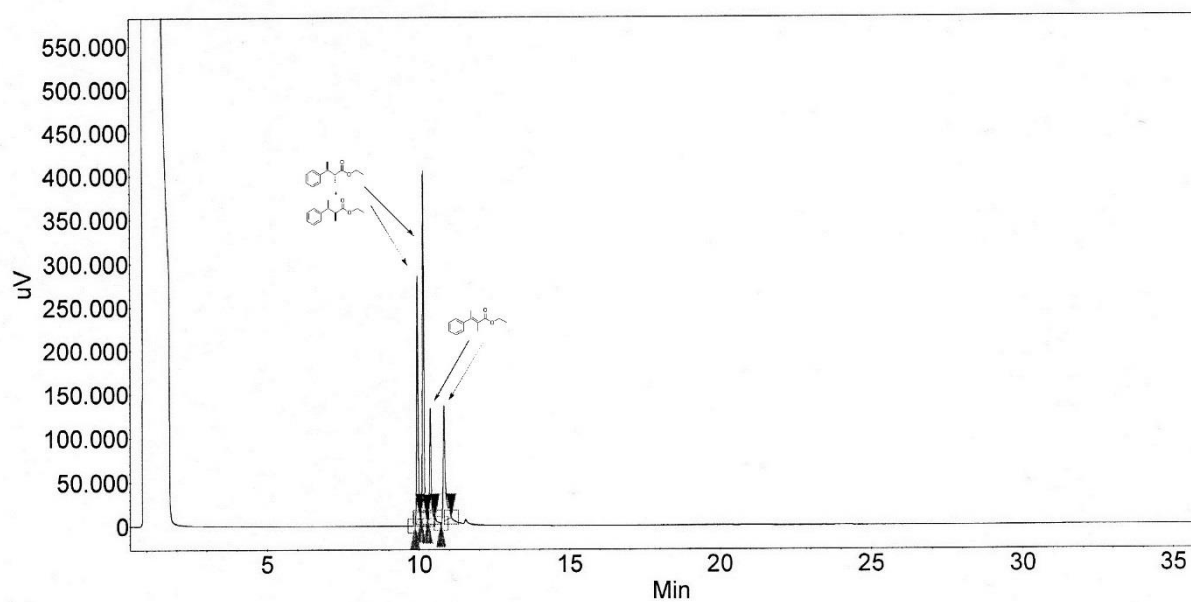

## Peak results :

| Index | Name    | Time [Min] | Quantity [% Area] | Height [uV] | Area [uV Min] | Area % [%] |
|-------|---------|------------|-------------------|-------------|---------------|------------|
| 1     | UNKNOWN | 9.96       | 26.83             | 281221.8    | 14658.6       | 26.832     |
| 2     | UNKNOWN | 10.15      | 39.25             | 397480.1    | 21441.8       | 39.249     |
| 3     | UNKNOWN | 10.37      | 13.46             | 125736.1    | 7354.0        | 13.461     |
| 4     | UNKNOWN | 10.83      | 20.46             | 131657.1    | 11175.8       | 20.457     |
| Total |         |            | 100.00            | 936095.0    | 54630.3       | 100.000    |

# GC/MS of 9s minor diastereomer

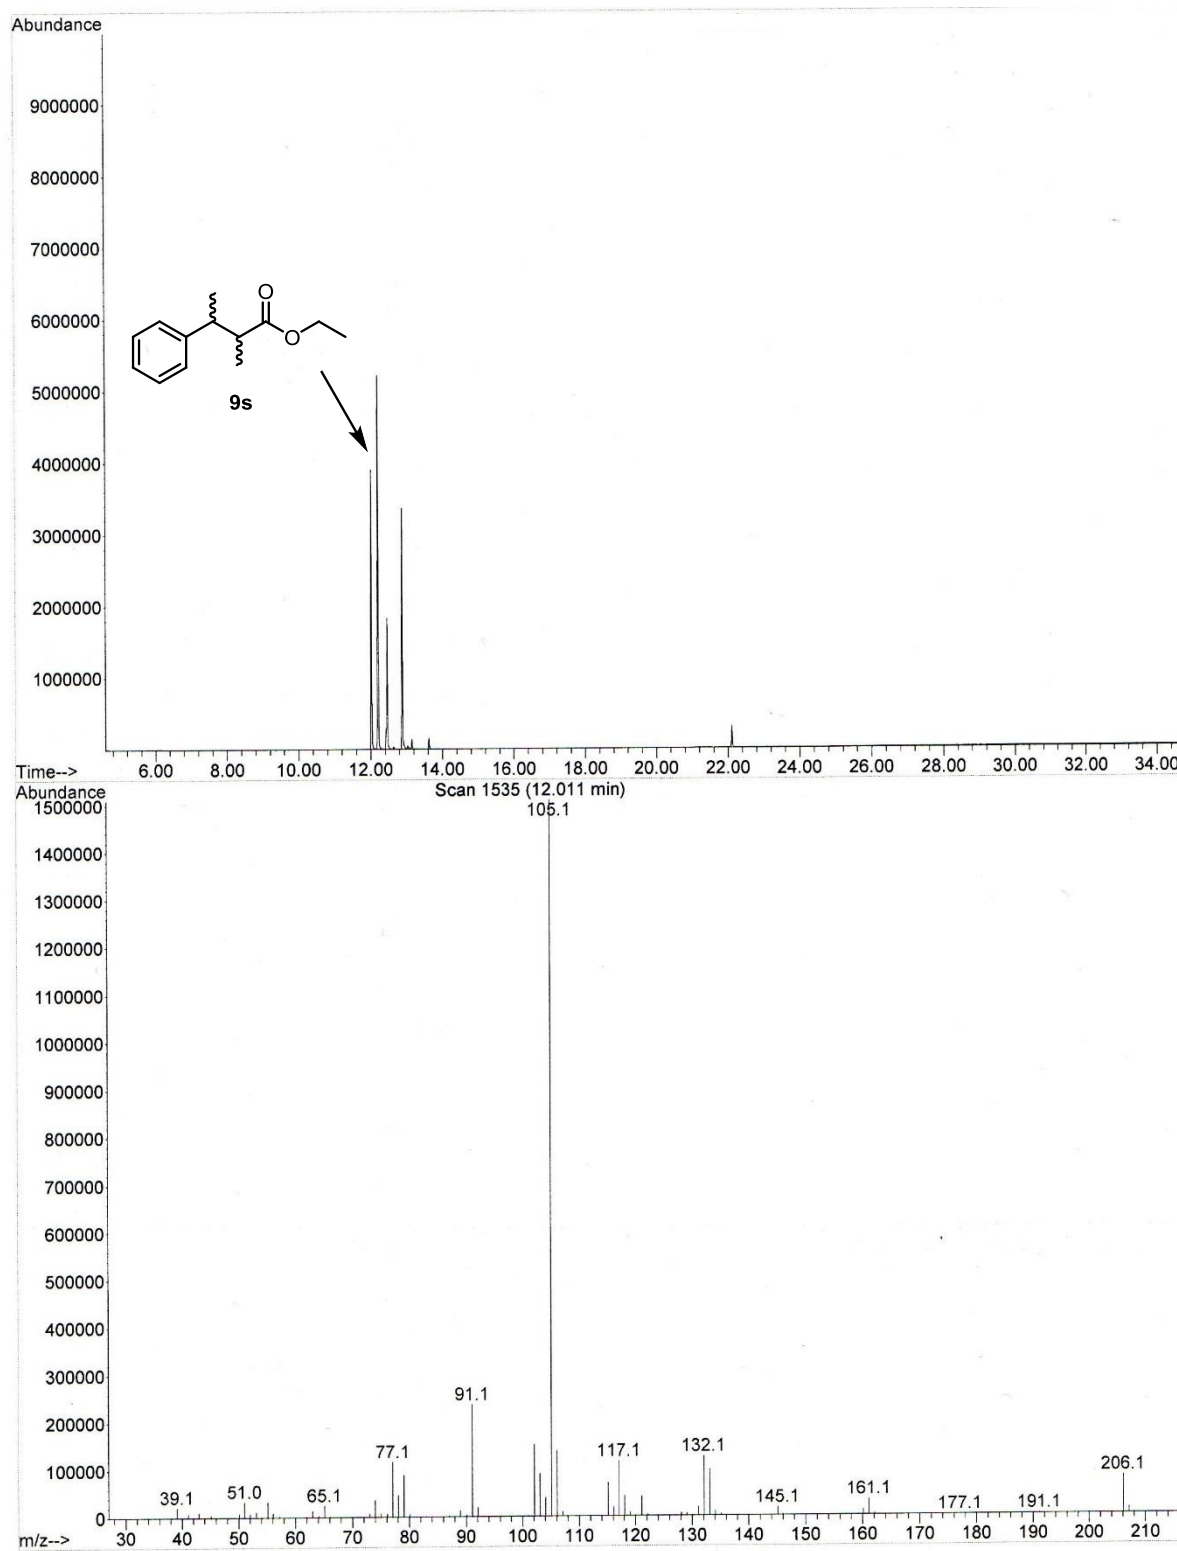

# GC/MS of 9s major diastereomer

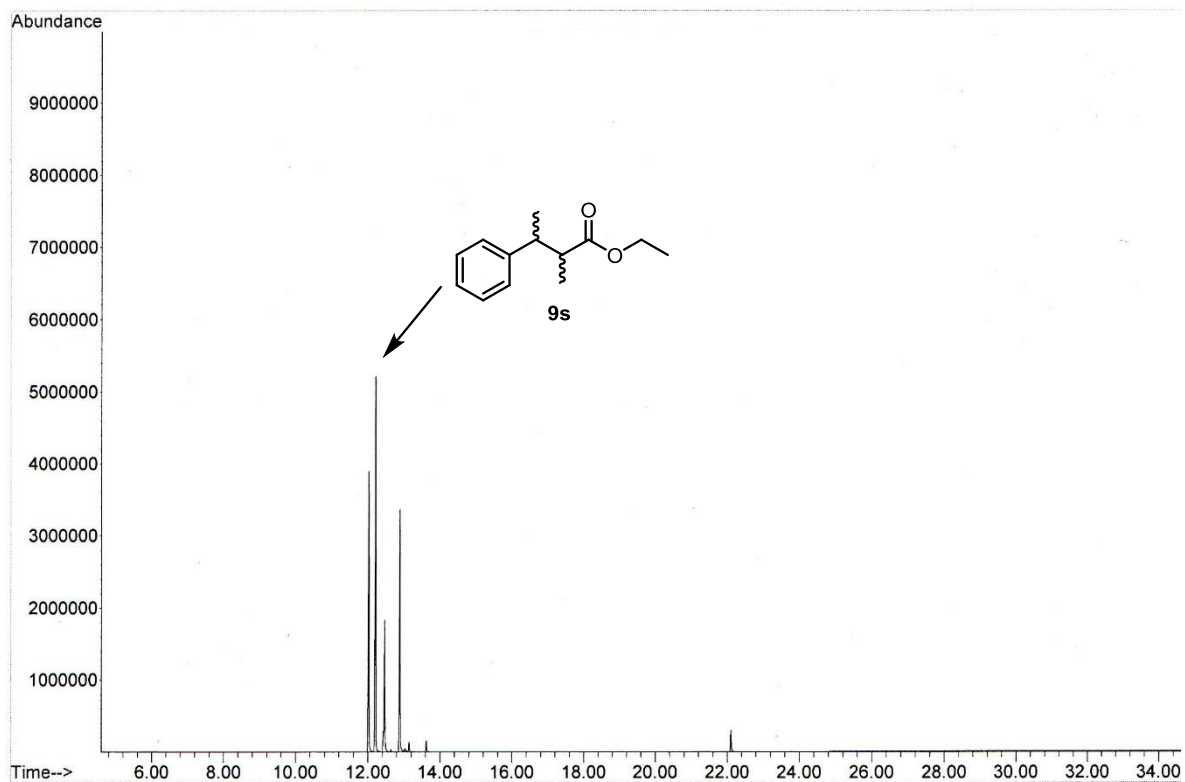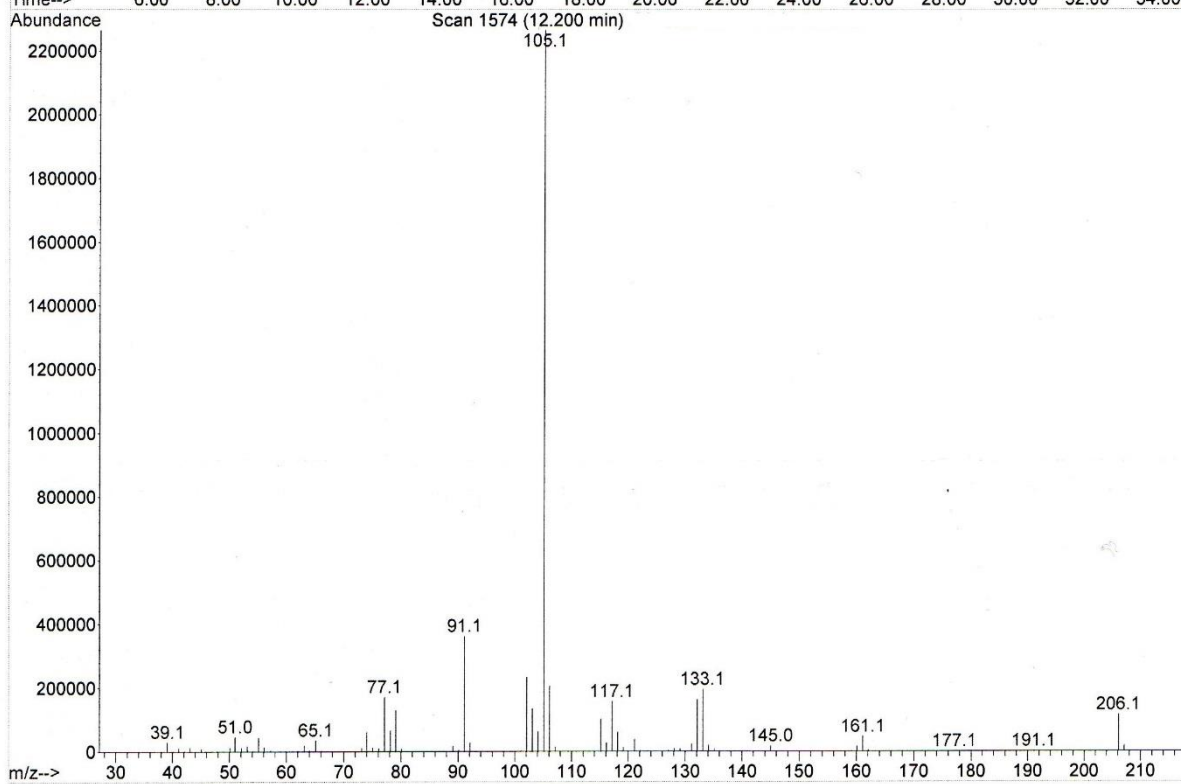

# GC/MS of E-8s

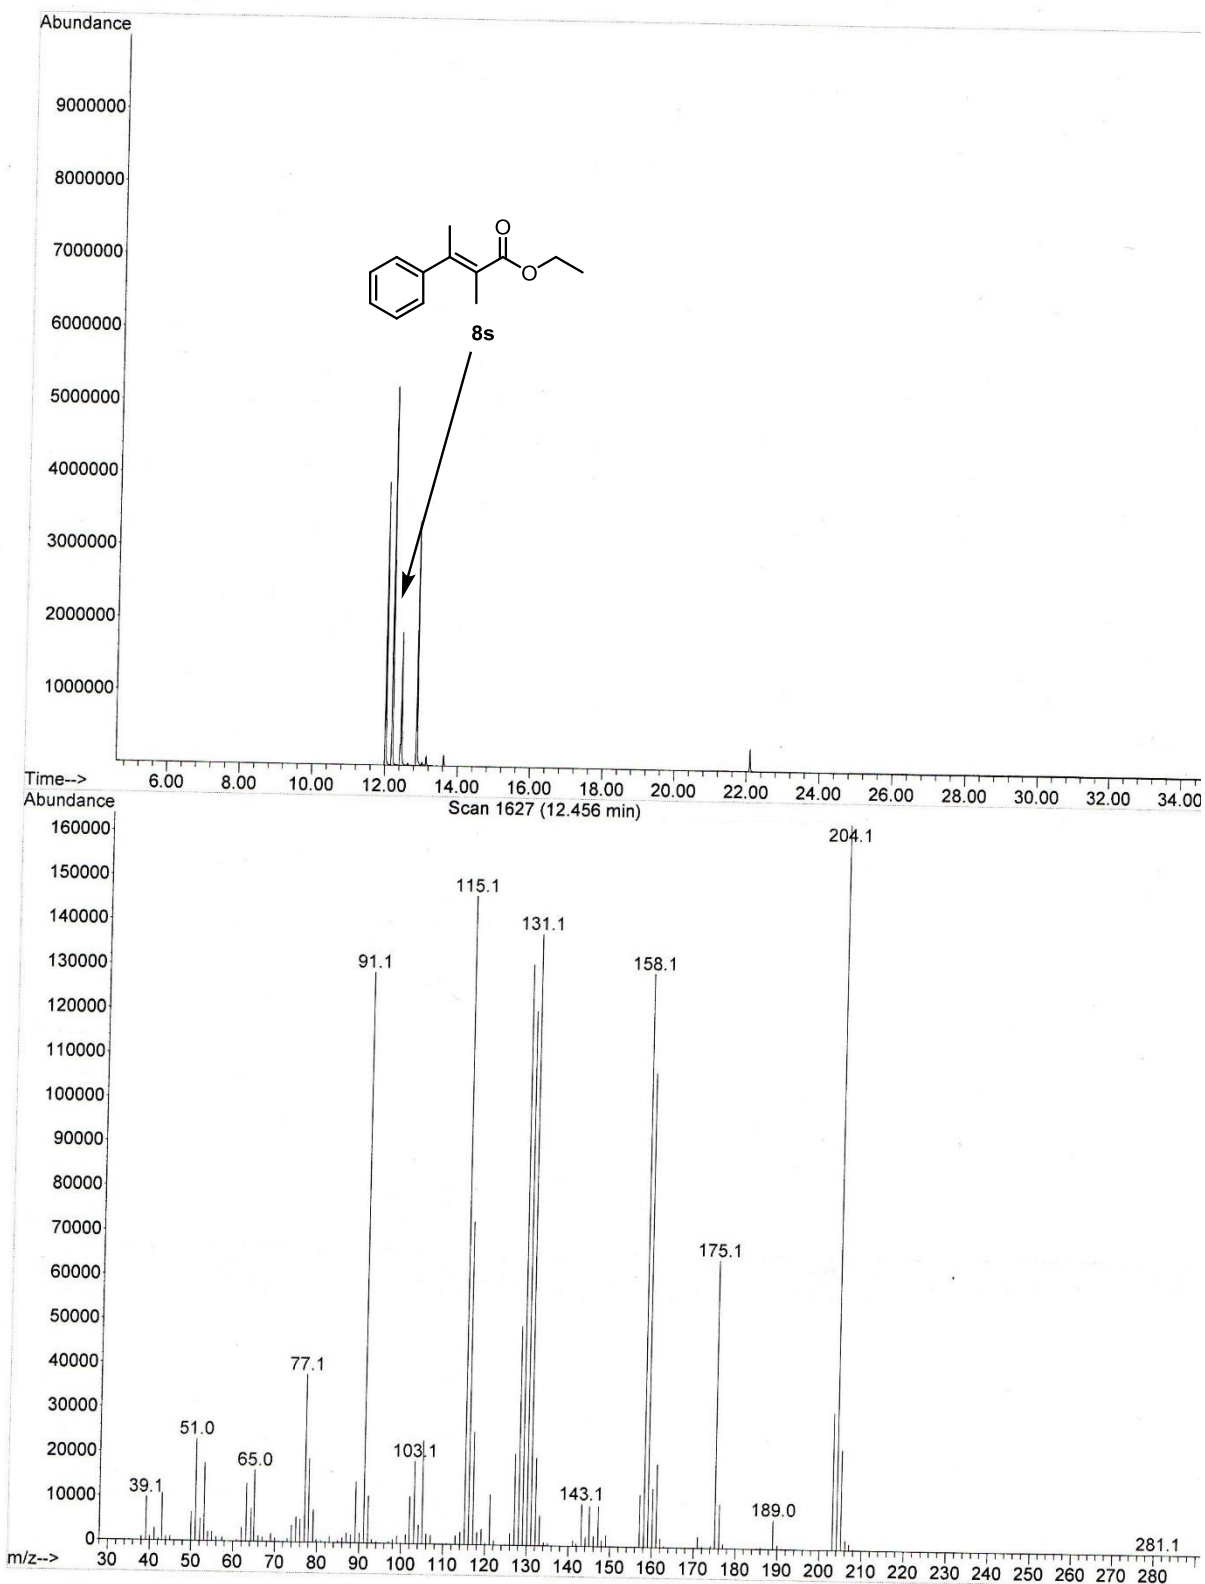

# GC/MS of Z-8s

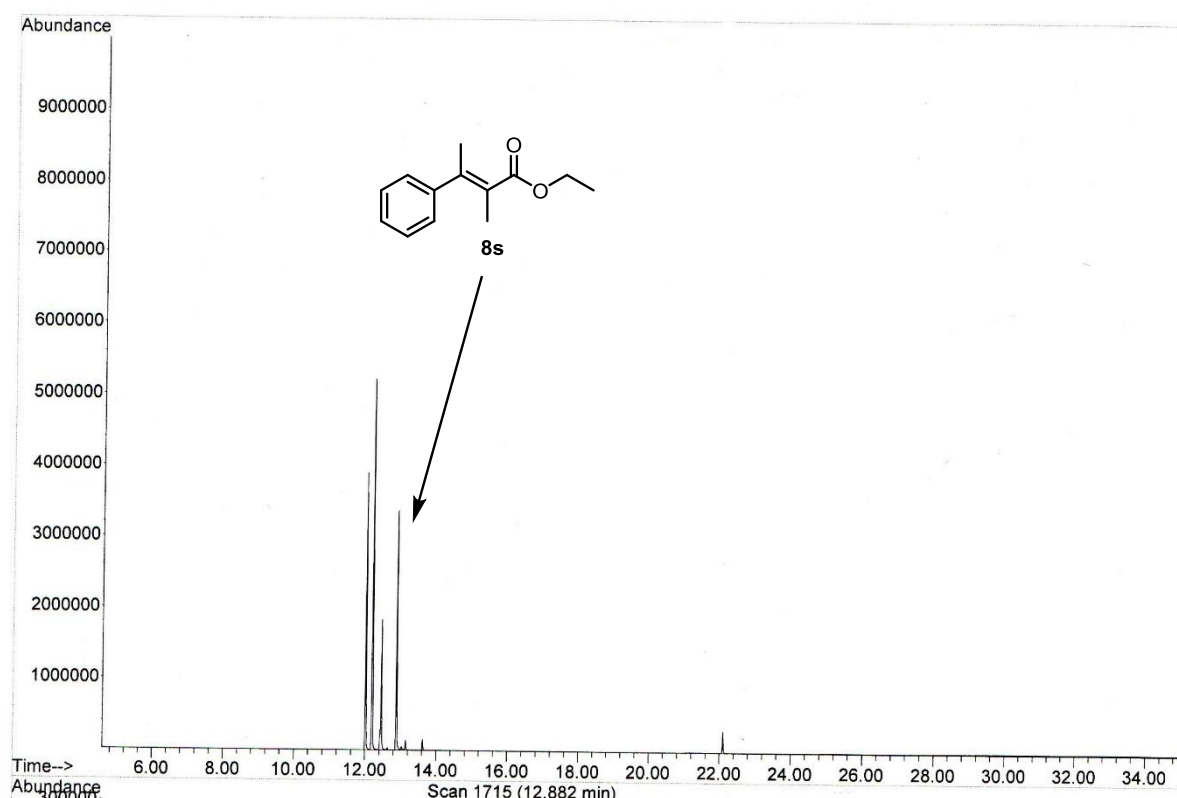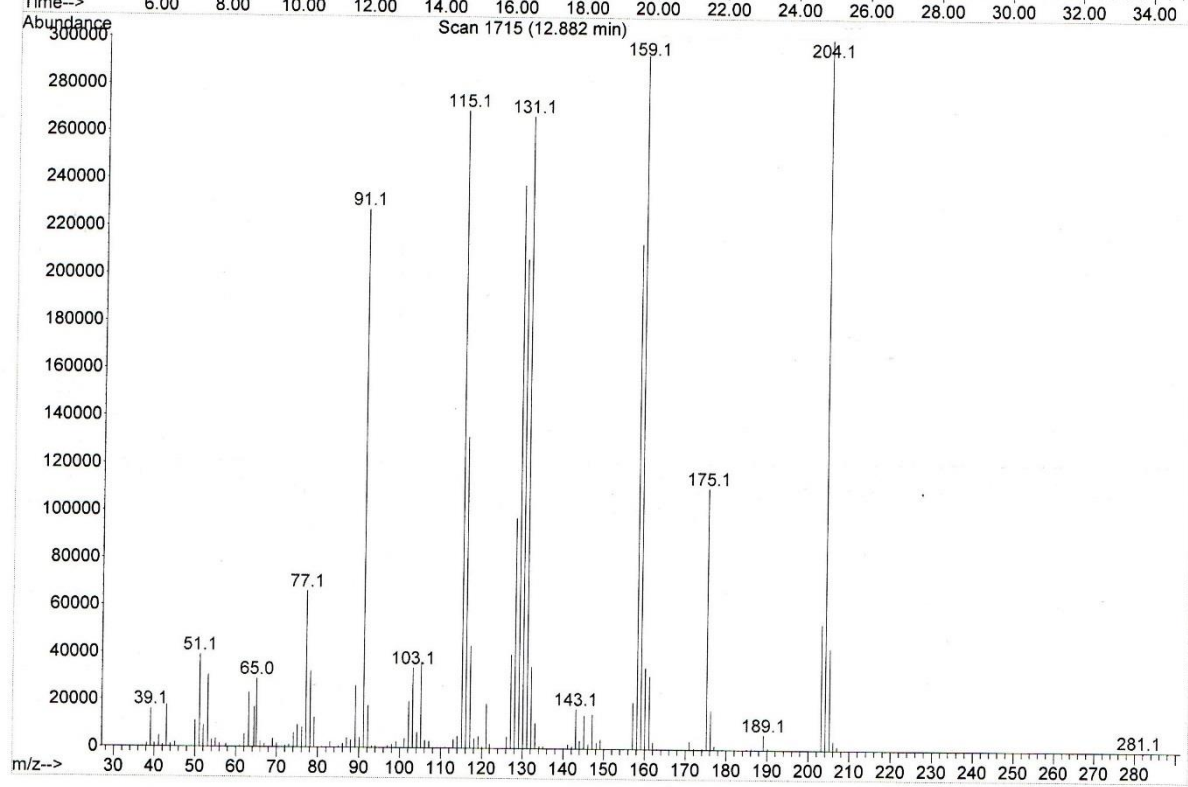

#### 4.4.21 Ethyl 3-cyclohexylbutanoate (**9t**)

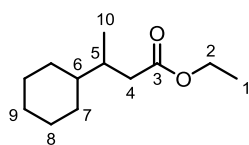

**9t**  
C<sub>12</sub>H<sub>22</sub>O<sub>2</sub>  
Mw = 198.31

Prepared according to **GP2** from ethyl (*E*)-3-cyclohexylbut-2-enoate (**8t**, 49 mg, 0.25 mmol, 1.0 equiv), [SImesCuCl] (**6**, 5.1 mg, 13 μmol, 5.0 mol%) and NaOtBu (7.2 mg, 75 μmol, 30 mol%) in 1,4-dioxane (1.5 mL). The reaction mixture was stirred for 16 h at 100 °C. Purification by flash column chromatography on silica gel (*n*-pentane/*tert*-butyl methyl ether = 50:1) yielded **9t** as a colorless oil (41 mg, 0.21 mmol, 83%).

$R_f = 0.63$  (SiO<sub>2</sub>, cyclohexane/*tert*-butyl methyl ether = 9:1).

**<sup>1</sup>H NMR** (500 MHz, CDCl<sub>3</sub>): δ = 0.88 (d, <sup>3</sup>J<sub>10,5</sub> = 6.8 Hz, 3H, H-10), 0.91–1.04 (m, 2H, H-9\*), 1.05–1.23 (m, 4H, H-6/H-7\*/H-7'\*), 1.25 (t, <sup>3</sup>J<sub>1,2</sub> = 7.1 Hz, 3H, H-1), 1.59–1.68 (m, 3H, H-9\*/H-8\*), 1.69–1.78 (m, 2H, H-8'\*), 1.85 (m<sub>c</sub>, 1H, H-5), 2.21 (m<sub>c</sub>, 2H, H-4), 4.12 (q, <sup>3</sup>J<sub>2,1</sub> = 7.1 Hz, 2H, H-2) ppm.

**<sup>13</sup>C NMR** (126 MHz, CDCl<sub>3</sub>): δ = 14.4 (C-1), 16.6 (C-10), 26.7 (C-7)\*, 26.8 (C-8)\*, 26.8 (C-9)\*, 29.0 (C-7')\*, 30.4 (C-8')\*, 35.5 (C-5), 39.4 (C-4), 42.7 (C-6), 60.2 (C-2), 174.0 (C-3) ppm.

**HRMS** (APCI) for C<sub>12</sub>H<sub>23</sub>O<sub>2</sub><sup>+</sup> [(M+H)<sup>+</sup>] calculated: 199.1693, found: 199.1689.

The data is in accordance with literature.<sup>[31]</sup>

#### 4.4.22 Ethyl 3-methylundecanoate (**9u**)

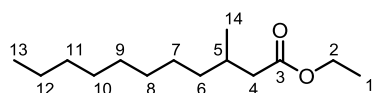

**9u**  
C<sub>14</sub>H<sub>28</sub>O<sub>2</sub>  
Mw = 228.38

Prepared according to **GP2** from ethyl (*E*)-3-methylundec-2-enoate (**8u**, 57 mg, 0.25 mmol, 1.0 equiv), [SImesCuCl] (**6**, 5.1 mg, 13 μmol, 5.0 mol%) and NaOtBu (7.2 mg, 75 μmol, 30 mol%) in 1,4-dioxane (1.5 mL). The reaction mixture was stirred for 16 h at 100 °C. Purification by flash column chromatography on silica gel (*n*-pentane/*tert*-butyl methyl ether = 50:1) yielded **9u** as a colorless oil (52.7 mg, 0.231 mmol, 92%).

$R_f = 0.78$  (SiO<sub>2</sub>, cyclohexane/*tert*-butyl methyl ether = 9:1).

**<sup>1</sup>H NMR** (500 MHz, CDCl<sub>3</sub>): δ = 0.87 (t, <sup>3</sup>J<sub>13,12</sub> = 13.9 Hz, 3H, H-13), 0.92 (d, <sup>3</sup>J<sub>14,5</sub> = 6.6 Hz, 3H, H-14), 1.12–1.34 (m, 17H, H-1/H-6/H-7/H-8/H-9/H-10/H-11/H-12), 1.94 (m<sub>c</sub>, 1H, H-5), 2.18 (m<sub>c</sub>, 2H, H-4), 4.12 (q, <sup>3</sup>J<sub>2,1</sub> = 7.1, 2H, H-7) ppm.

**<sup>13</sup>C NMR** (126 MHz, CDCl<sub>3</sub>): δ = 14.2 (C-13), 14.4 (C-1), 19.8 (C-14), 22.8 (C-12)\*, 27.0 (C-10)\*, 29.4 (C-9)\*, 29.7 (C-8)\*, 29.9 (C-7)\*, 30.5 (C-5), 32.0 (C-11)\*, 36.8 (C-6), 42.1 (C-4), 60.1 (C-2), 173.5 (C-3) ppm.

**HRMS** (APCI) for C<sub>14</sub>H<sub>29</sub>O<sub>2</sub><sup>+</sup> [(M+H)<sup>+</sup>] calculated: 229.2162, found: 229.2157.

**IR** (ATR):  $\tilde{\nu} = 2923$  (m), 2853 (m), 1735 (s), 1461 (m), 1371 (m), 1250 (m), 1159 (m), 1032 (m), 954 (w), 844 (w), 722 (w) cm<sup>-1</sup>.

#### 4.4.23 Ethyl 3-propylhexanoate (9v)

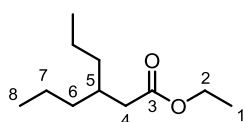

**9v**  
C<sub>11</sub>H<sub>22</sub>O<sub>2</sub>  
Mw = 186.29

Prepared according to **GP2** from ethyl 3-propylhex-2-enoate (46 mg, 0.25 mmol, 1.0 equiv), [SiMesCuCl] (**6**, 5.1 mg, 13 μmol, 5.0 mol%) and NaOtBu (7.2 mg, 75 μmol, 30 mol%) in 1,4-dioxane (1.5 mL). The reaction mixture was stirred for 16 h at 100 °C. Purification by flash column chromatography on silica gel (*n*-pentane/Et<sub>2</sub>O = 50:1) yielded **9v** as a colorless oil (100% conversion, due to volatility of the product the yield could not be determined).

$R_f = 0.78$  (SiO<sub>2</sub>, cyclohexane/*tert*-butyl methyl ether = 9:1).

**<sup>1</sup>H NMR** (500 MHz, CD<sub>2</sub>Cl<sub>2</sub>): δ = 0.88 (t, <sup>3</sup>J<sub>8,7</sub> = 7.0 Hz, 6H, H-8), 1.19–1.33 (m, 11H, H-1/H-6/H-7), 1.84 (m<sub>c</sub>, 1H, H-5), 2.19 (d, <sup>3</sup>J<sub>4,5</sub> = 6.8 Hz, 2H, H-4), 4.08 (q, <sup>3</sup>J<sub>2,1</sub> = 7.1 Hz, 2H, H-2) ppm.

Due to volatility of the product, the sample contains *n*-pentane residues. Therefore, the value of the integration for H-8 and H1/H-6/H-7 is too high (see the attached spectra).

**<sup>13</sup>C NMR** (126 MHz, CD<sub>2</sub>Cl<sub>2</sub>): δ = 14.4 (C-1/C-8), 20.0 (C-7), 35.0 (C-5), 36.6 (C-6), 39.6 (C-4), 60.3 (C-2), 173.7 (C-3) ppm.

**HRMS** (APCI) for C<sub>11</sub>H<sub>23</sub>O<sub>2</sub><sup>+</sup> [(M+H)<sup>+</sup>] calculated: 187.1693, found: 187.1692.

**IR** (ATR):  $\tilde{\nu} = 2957$  (s), 2929 (m), 2871 (m), 2358 (w), 1735 (s), 1641 (w), 1462 (m), 1374 (w), 1302 (w), 1247 (m), 1173 (m), 1106 (w), 1036 (m), 854 (w), 739 (w) cm<sup>-1</sup>.

#### 4.4.24 *N,N*-diethyl-3-phenylbutanamide (11)

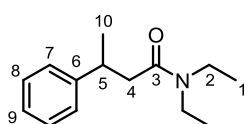

**11**  
C<sub>14</sub>H<sub>21</sub>NO  
Mw = 219.32

Prepared according to **GP2** from (*E*)-*N,N*-diethyl-3-phenylbut-2-enamide (**10**, 46 mg, 0.25 mmol, 1.0 equiv), [SiMesCuCl] (**6**, 5.1 mg, 13 μmol, 5.0 mol%) and NaOtBu (7.2 mg, 75 μmol, 30 mol%) in 1,4-dioxane (1.5 mL). The reaction mixture was stirred for 16 h at 100 °C. Purification by preparative TLC (Al<sub>2</sub>O<sub>3</sub>, cyclohexane/*tert*-butyl methyl ether = 5:1, Et<sub>3</sub>N 2%) yielded **11** as a colorless oil (60% conversion (average of 3 runs), 9.5 mg, 43 μmol, 17%).

$R_f = 0.28$  (SiO<sub>2</sub>, cyclohexane/*tert*-butyl methyl ether = 2:1).

**<sup>1</sup>H NMR** (500 MHz, CD<sub>2</sub>Cl<sub>2</sub>): δ = 1.02 (t, <sup>3</sup>J<sub>1,2</sub> = 7.1 Hz, 3H, H-1)\*, 1.07 (t, <sup>3</sup>J<sub>1',2'</sub> = 7.1 Hz, 3H, H-1')\*, 1.28 (d, <sup>3</sup>J<sub>10,5</sub> = 7.0 Hz, 3H, H-10), 2.51 (m<sub>c</sub>, 2H, H-4), 3.19 (t, <sup>3</sup>J<sub>2,1</sub> = 7.1 Hz, 2H, H-2), 3.23–3.38 (m, 3H, H-5/H-2'), 7.14–7.20 (m, 1H, H-9), 7.21–7.31 (m, 4H, H-7/H-8) ppm.

**<sup>13</sup>C NMR** (126 MHz, CD<sub>2</sub>Cl<sub>2</sub>): δ = 13.2 (C-1)\*, 14.5 (C-1')\*, 21.8 (C-10), 36.9 (C-5), 40.39 (C-2)\*\*, 41.8 (C-4), 42.2 (C-2')\*\*, 126.4 (C-9), 127.3 (C-7), 128.6 (C-8), 147.3 (C-6), 170.7 (C-3) ppm.

**HRMS** (APCI) for  $C_{14}H_{22}NO^+$  [(M+H)<sup>+</sup>] calculated: 220.1696, found: 220.1694.

**IR** (ATR):  $\tilde{\nu}$  = 2968 (m), 2931 (w), 2359 (w), 1638 (s), 1454 (m), 1278 (w), 11276 (w), 1222 (w), 1142 (w), 1085 (w), 1021 (w), 761 (w), 701 (m)  $cm^{-1}$ .

#### 4.4.25 Ethyl (*E*)-5-phenylpent-4-enoate (**13a**)

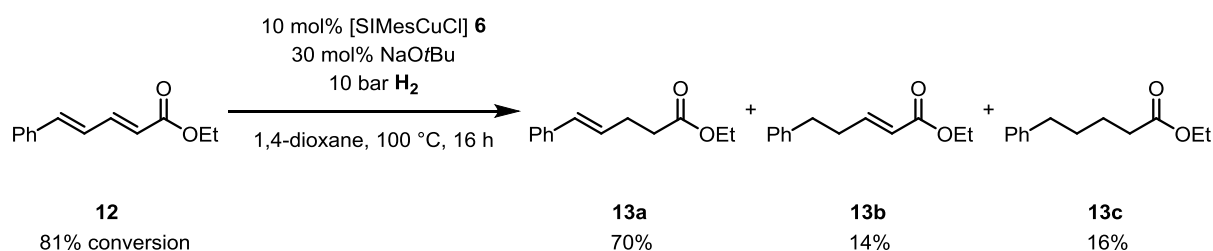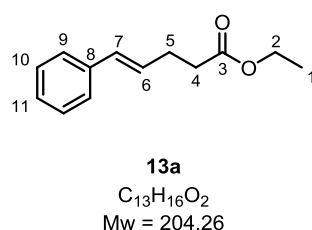

Prepared according to **GP2** from ethyl (*2E,4E*)-5-phenylpenta-2,4-dienoate (**12**, 51 mg, 0.25 mmol, 1.0 equiv), [SiMesCuCl] (**6**, 10.2 mg, 25.0  $\mu$ mol, 10.0 mol%) and NaOtBu (7.2 mg, 75  $\mu$ mol, 30 mol%) in 1,4-dioxane (1.5 mL). The reaction mixture was stirred for 16 h at 100 °C. Purification by flash column chromatography on silica gel (*n*-pentane/Et<sub>2</sub>O = 50:1) yielded **13** as a colorless oil (81% conversion, 35 mg combined yield of **12**, **13a**, **13b** and **13c**).

$R_f$  = 0.61 (SiO<sub>2</sub>, cyclohexane/*tert*-butyl methyl ether = 9:1).

**<sup>1</sup>H NMR** (500 MHz, CDCl<sub>3</sub>):  $\delta$  = 1.26 (t, <sup>3</sup> $J_{1,2}$  = 7.1 Hz, 3H, H-1), 2.45–2.57 (m, 4H, H4/H-5), 4.15 (q, <sup>3</sup> $J_{2,1}$  = 7.1 Hz, 2H, H-2), 6.21 (dt, <sup>3</sup> $J_{6,7}$  = 15.8 Hz, <sup>3</sup> $J_{6,5}$  = 6.6 Hz, 1H, H-6), 6.43 (d, <sup>3</sup> $J_{7,6}$  = 15.8 Hz, 1H, H-7), 7.15–7.23 (m, 1H, H-11)\*, 7.26–7.37 (m, 4H, H-9/H-10)\* ppm.

**<sup>13</sup>C NMR** (126 MHz, CDCl<sub>3</sub>):  $\delta$  = 14.4 (C-1), 28.4 (C-5), 34.2 (C-4), 60.5 (C-2), 126.1 (C-9), 127.2 (C-11)\*, 127.3 (C-10)\*, 128.6 (C-6), 131.0 (C-7), 137.5 (C-8), 173.1 (C-3) ppm.

Other unpicked and not integrated signals belong to the starting material or the other products.

Indicative signals for the starting material **12** in the <sup>1</sup>H NMR are at  $\delta$  = 5.84, 5.99 and 6.89 ppm. Indicative for the 1,6-conjugate reduction product **13b** are the signals at  $\delta$  = 5.82 and 7.00 ppm.

**HRMS** (APCI) for  $C_{13}H_{17}O_2^+$  [(M+H)<sup>+</sup>] calculated: 205.1223, found: 205.1221.



**<sup>1</sup>H NMR of 13a, 13b, 12**

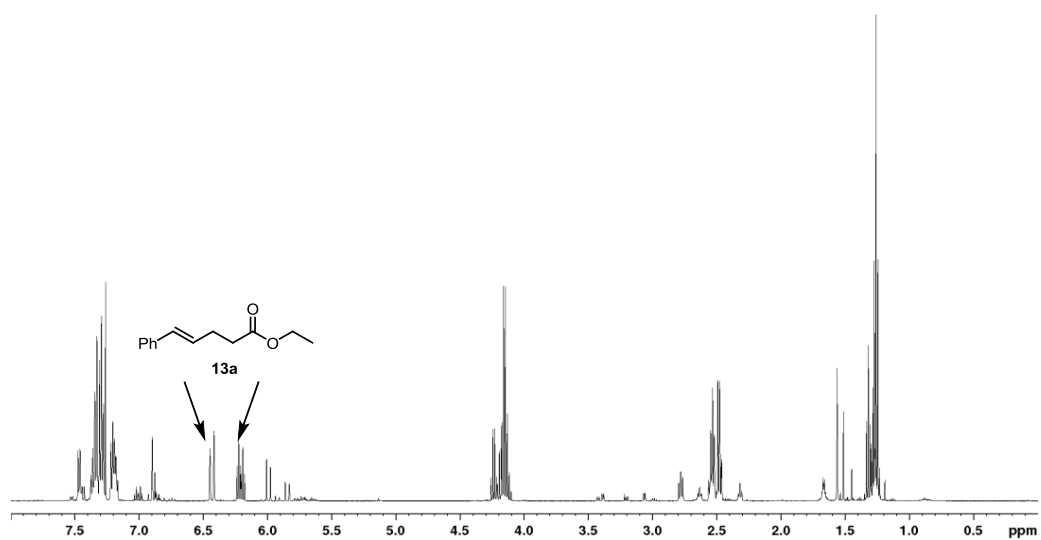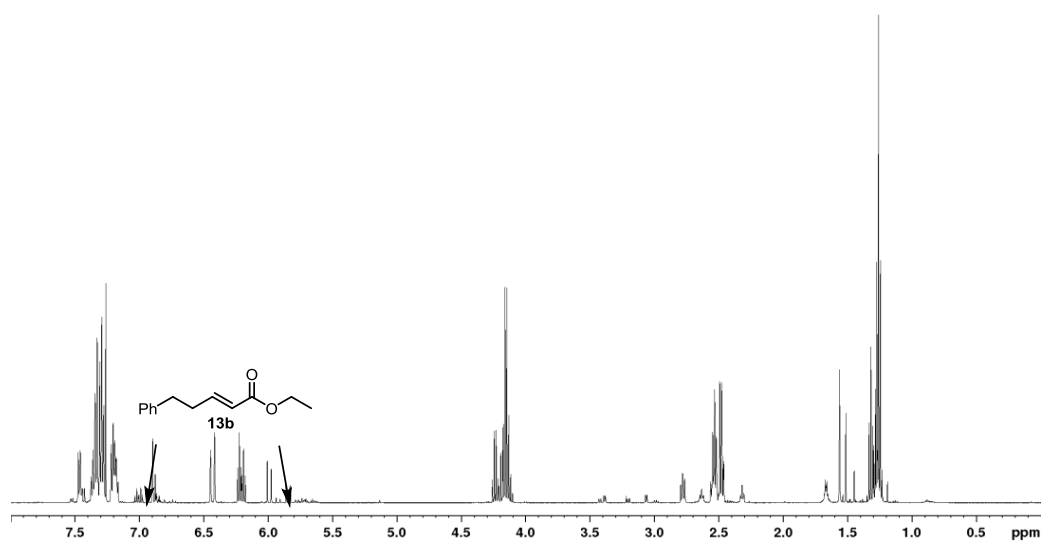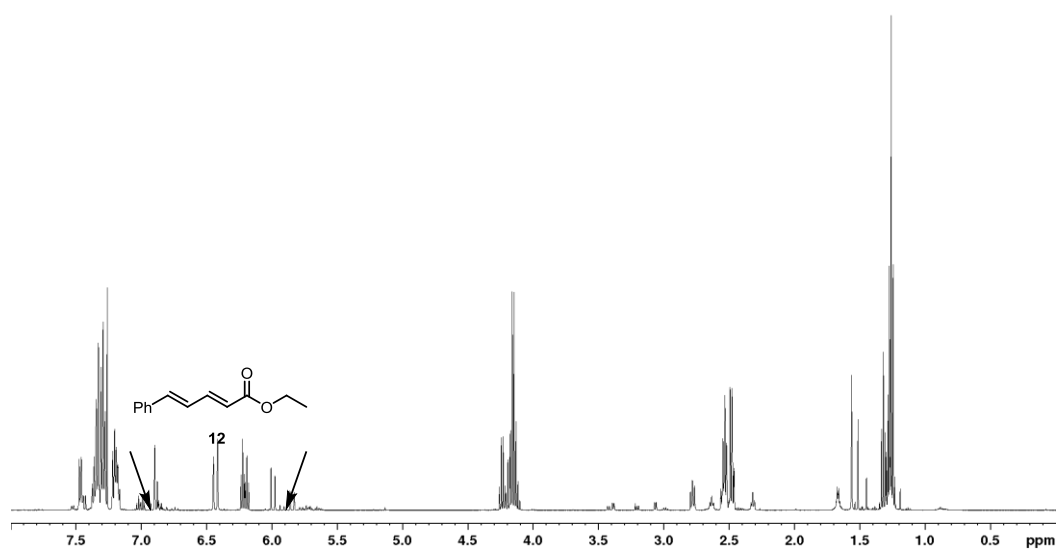

# GC of 13

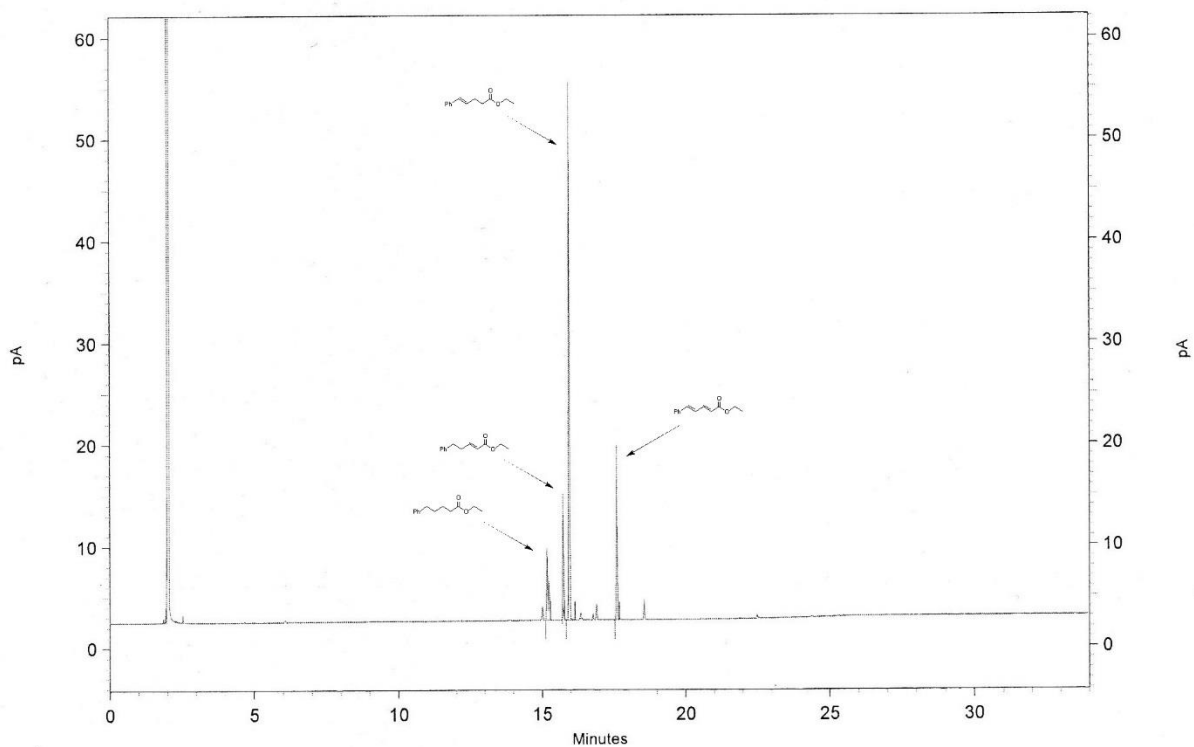

Back  
Signal  
Results

| Peak # | Retention Time | Height | Height Percent | Area    | Area Percent |
|--------|----------------|--------|----------------|---------|--------------|
| 1      | 15,1697        | 54197  | 7,9615         | 195890  | 13,2092      |
| 2      | 15,7293        | 88192  | 12,9553        | 166022  | 11,1952      |
| 3      | 15,9453        | 406108 | 59,6567        | 845219  | 56,9947      |
| 4      | 17,6103        | 132245 | 19,4266        | 275846  | 18,6008      |
| Totals |                | 680742 | 100,0000       | 1482977 | 100,0000     |

# GC/MS of 13c

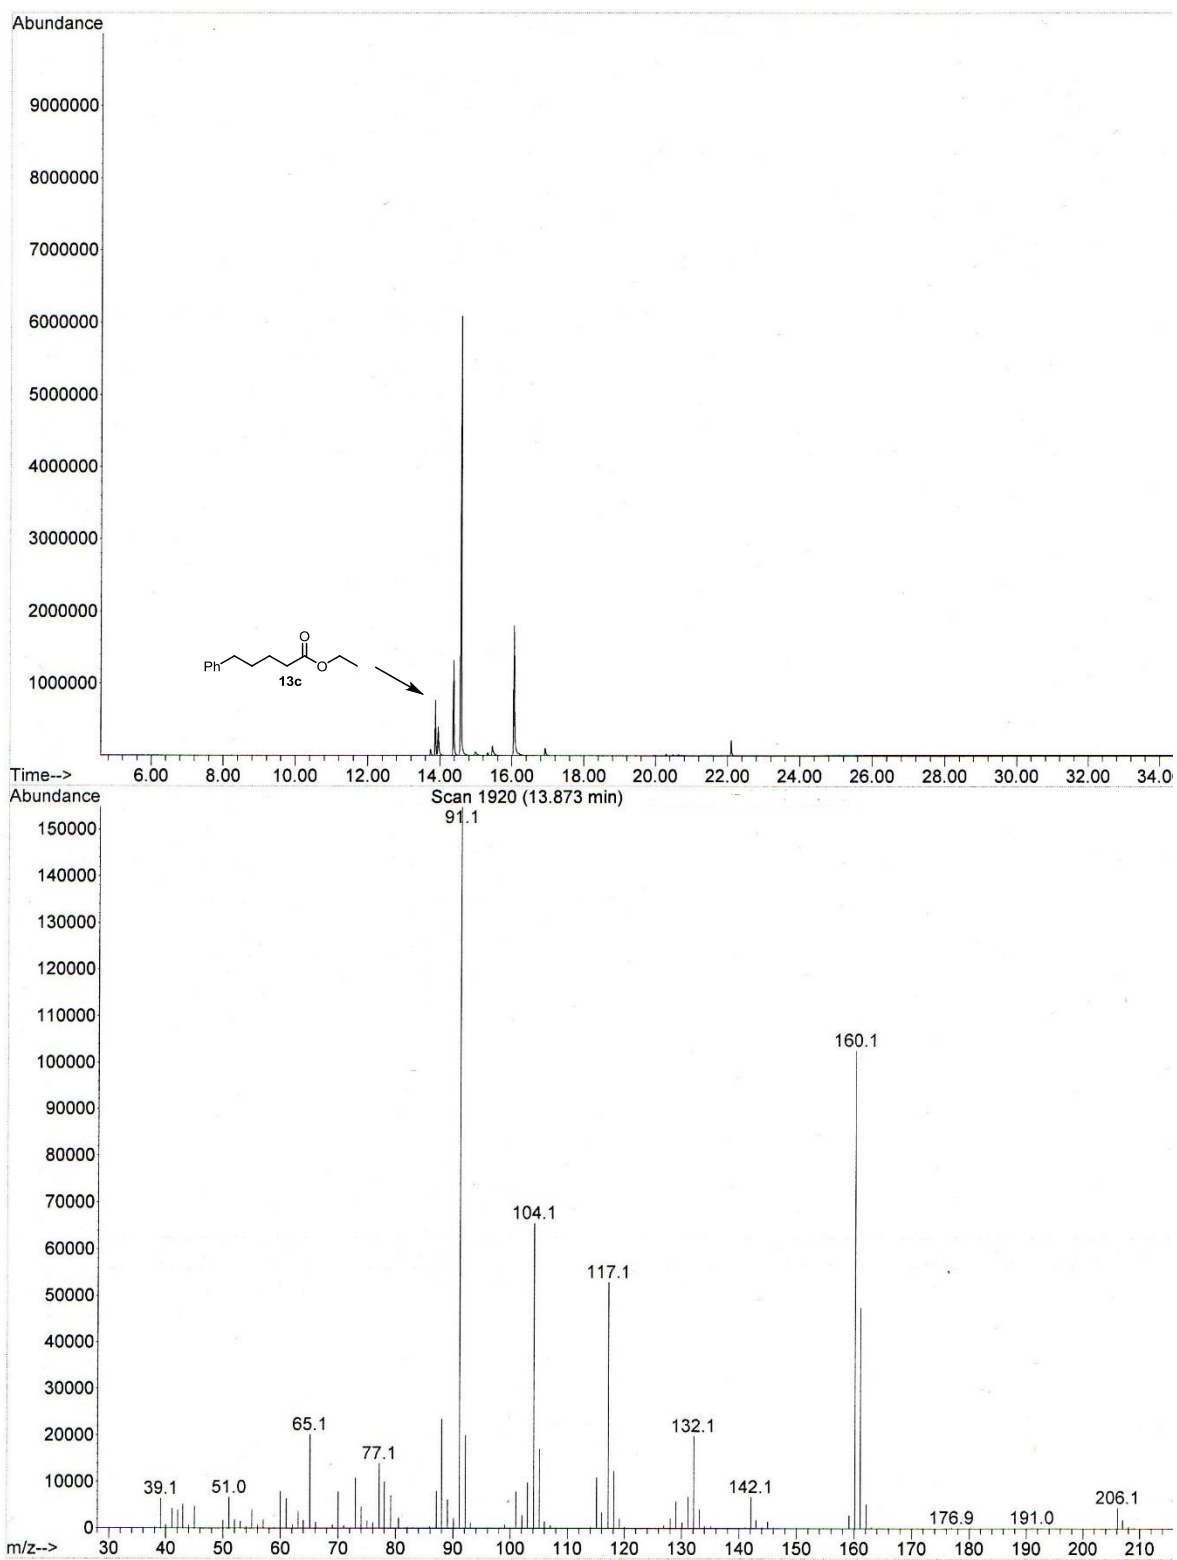

# GC/MS of 13b

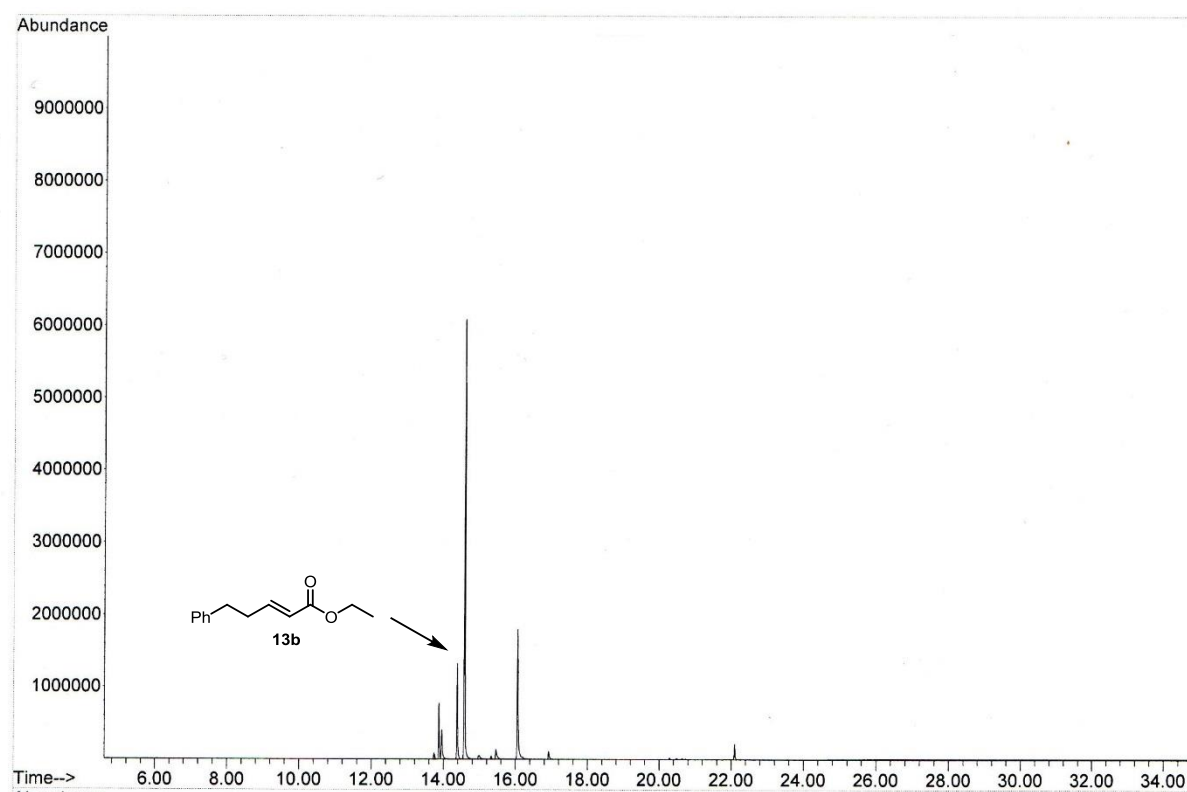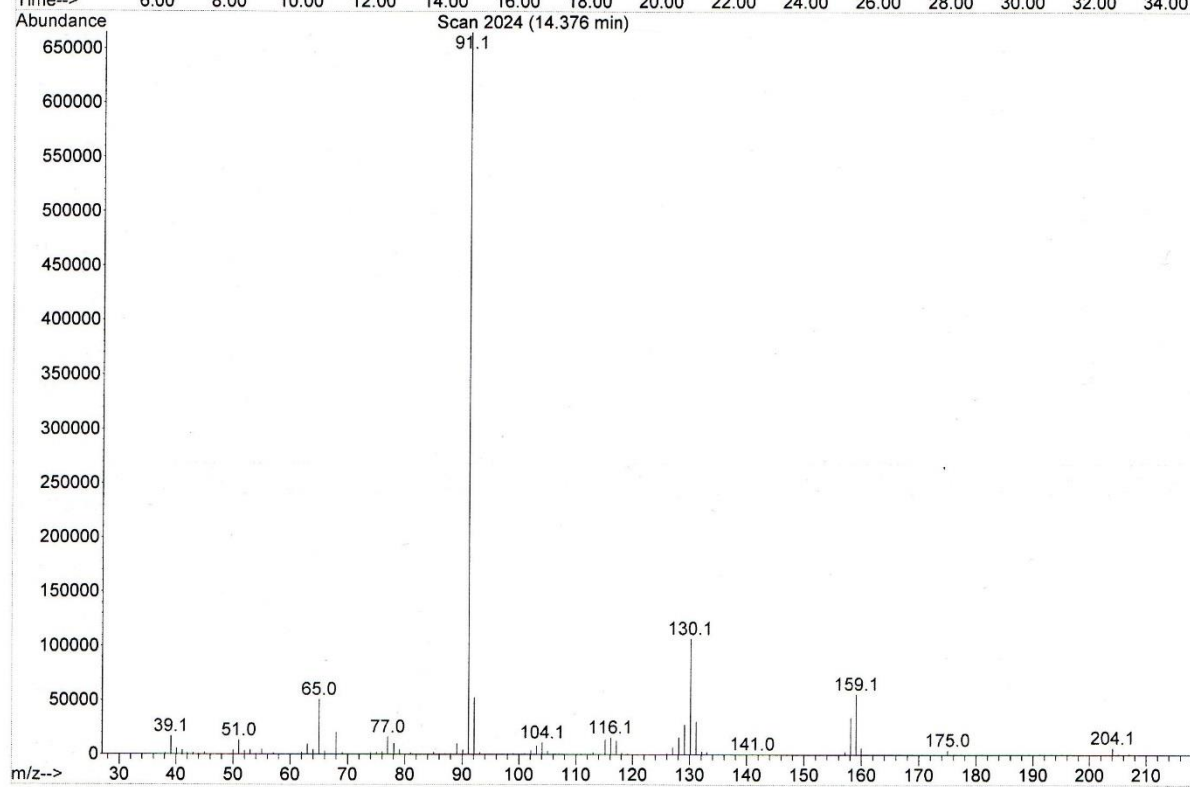

# GC/MS of 13a

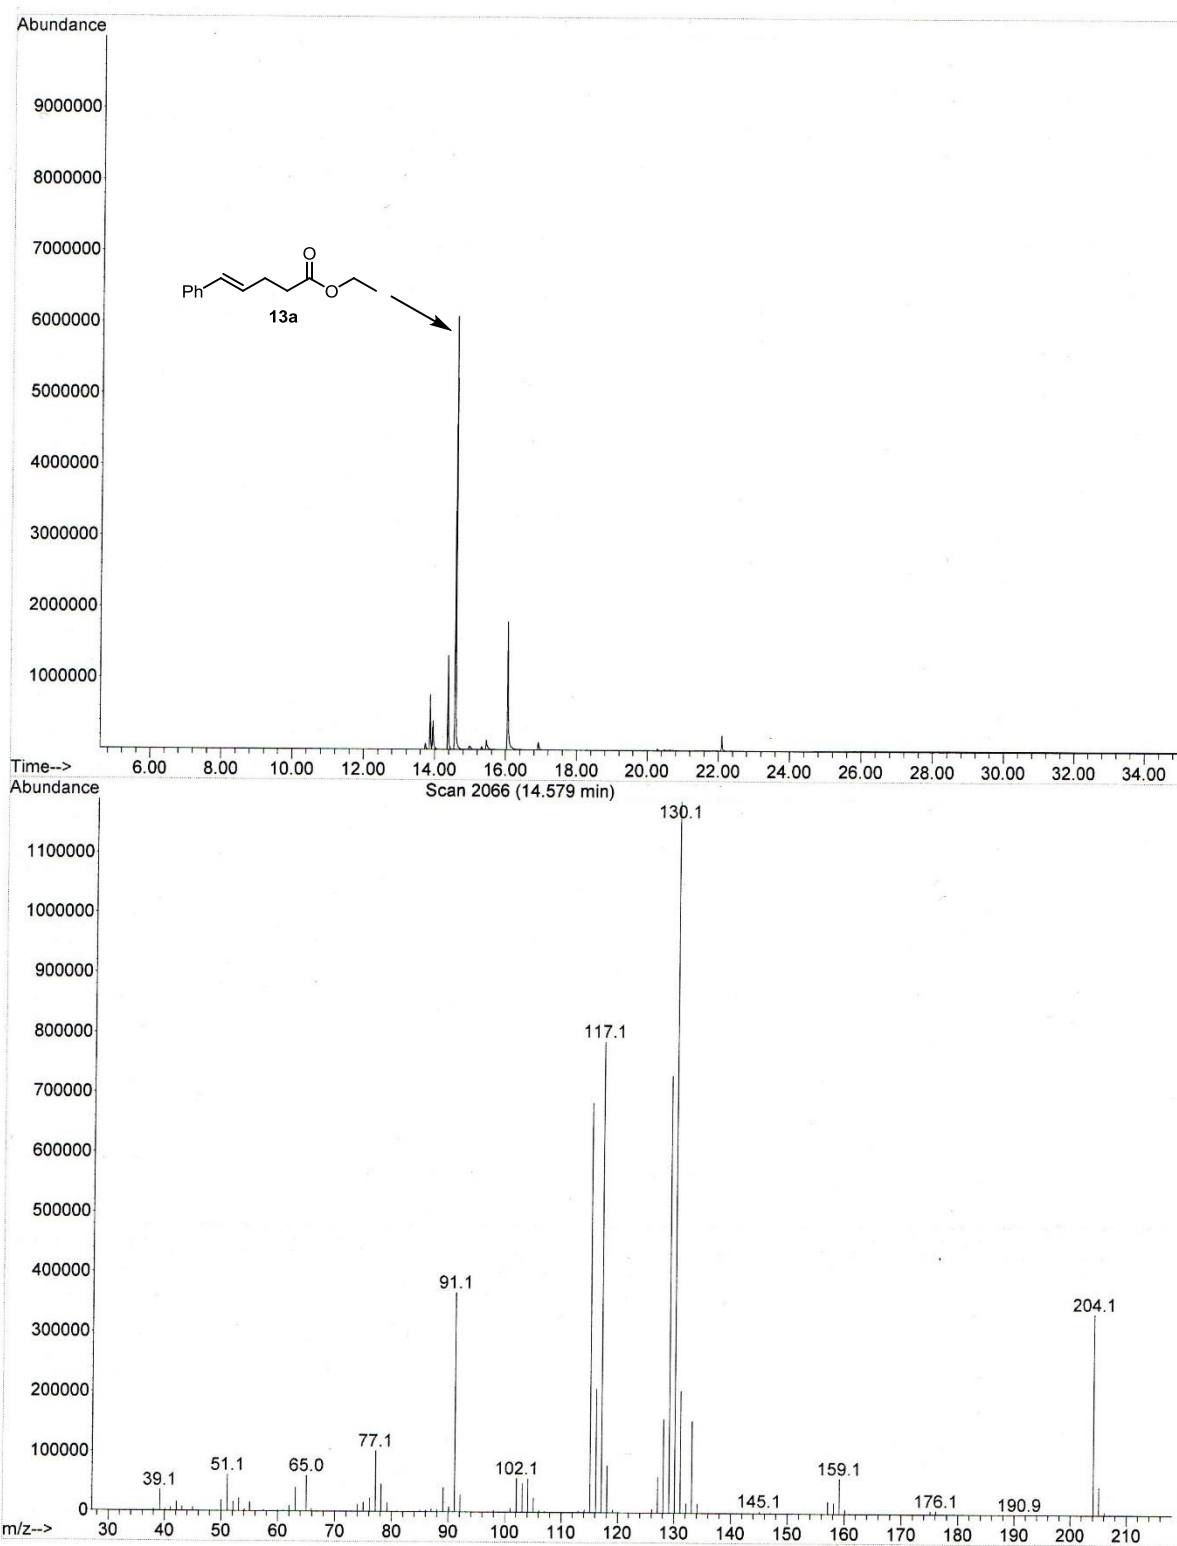

# GC/MS of 12

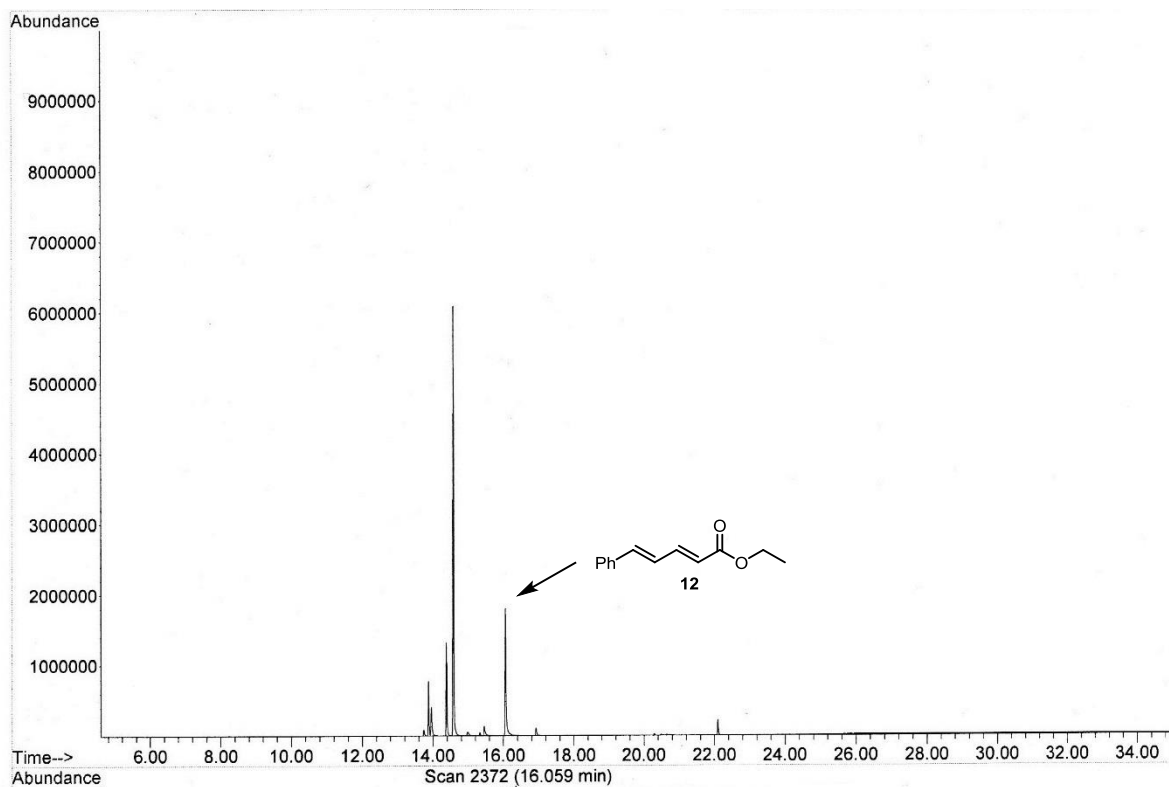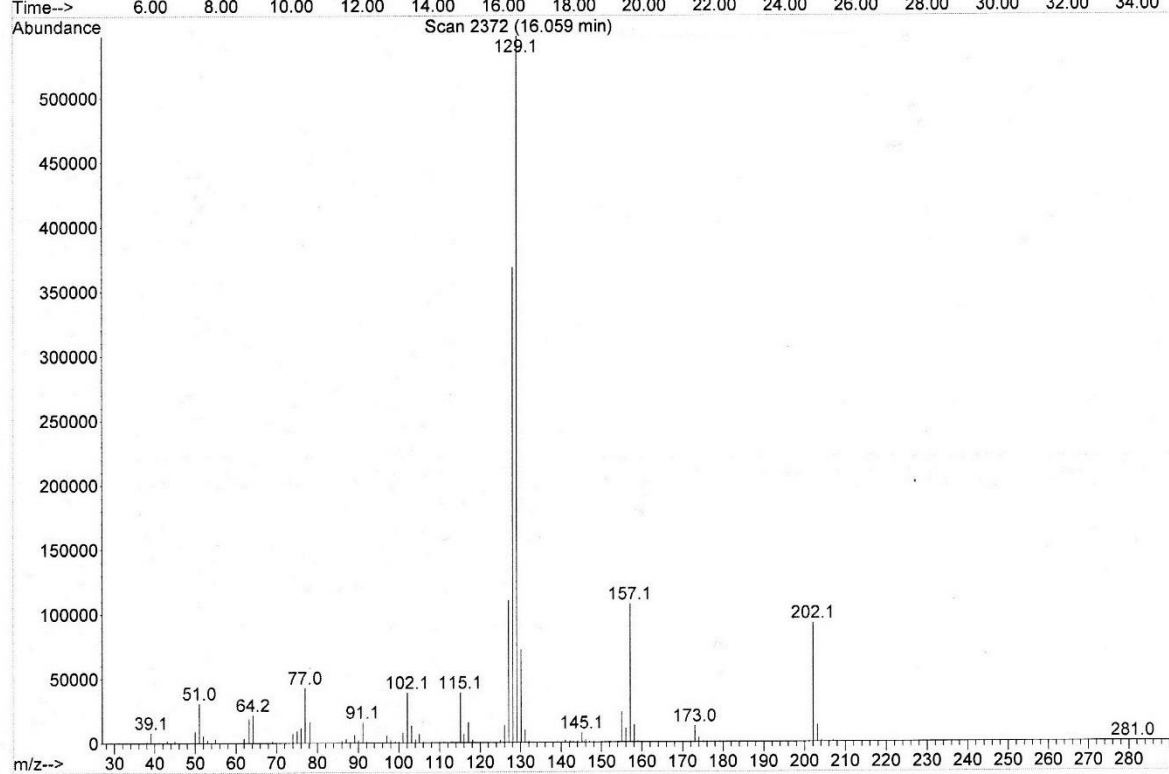

#### 4.4.26 Ethyl 3-(4-styrylphenyl)butanoate (**S9**)

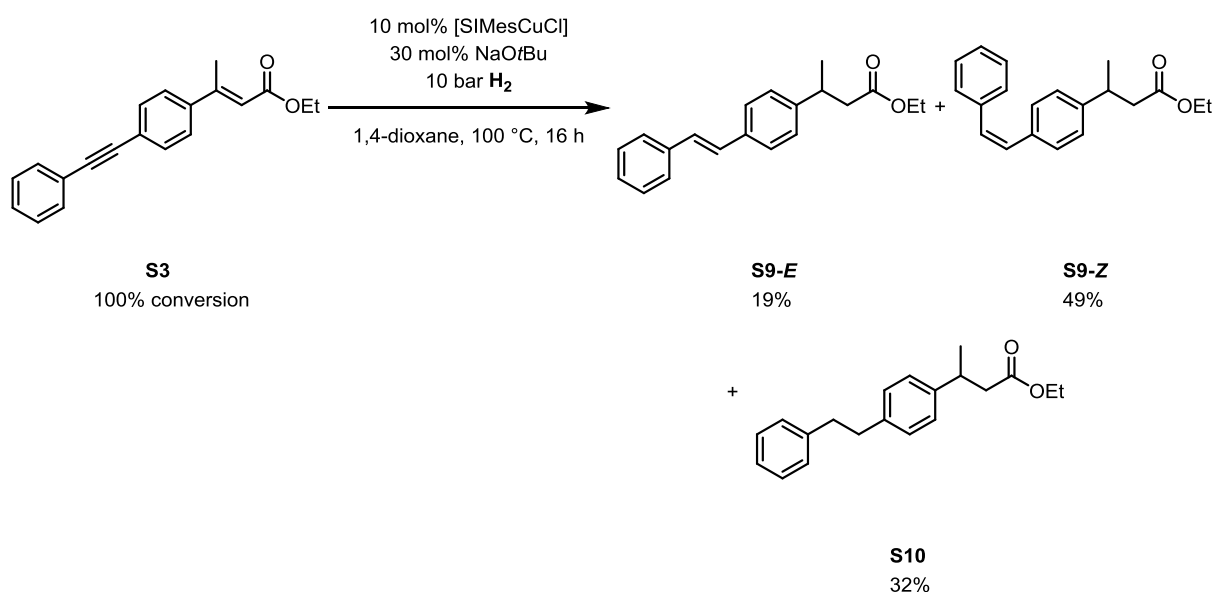

Prepared according to **GP2** from ethyl (*E*)-3-(4-(phenylethynyl)phenyl)but-2-enoate (**S3**, 69 mg, 0.25 mmol, 1.0 equiv), [SIMesCuCl] (**6**, 10.2 mg, 25.0  $\mu$ mol, 10.0 mol%) and NaOtBu (7.2 mg, 75  $\mu$ mol, 30 mol%) in 1,4-dioxane (1.5 mL). The reaction mixture was stirred for 16 h at 100 °C. Purification by flash column chromatography on silica gel (*n*-pentane/Et<sub>2</sub>O = 50:1) yielded a mixture of **S9-E**, **S9-Z** and **S10** as a colorless oil (full conversion, 44.6 mg combined yield of **S9-E**, **S9-Z** and **S10**).

$R_f = 0.16$  (SiO<sub>2</sub>, cyclohexane/*tert*-butyl methyl ether = 50:1).

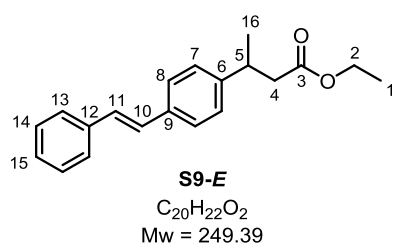

<sup>1</sup>H NMR (500 MHz, CD<sub>2</sub>Cl<sub>2</sub>):  $\delta$  = 1.19 (t, <sup>3</sup>J<sub>1,2</sub> = 7.1 Hz, 3H, H-1), 1.25–1.32 (m, 3H, H-16), 2.45–2.66 (m, 2H, H-4), 3.19–3.34 (m, 1H, H-5), 4.03–4.13 (m, 2H, H-2), 6.55 (m<sub>c</sub>, 2H, H-10/H-11), 7.05–7.53 (m, 9H, H-7/H-8/H-13/H-14/H-15) ppm.

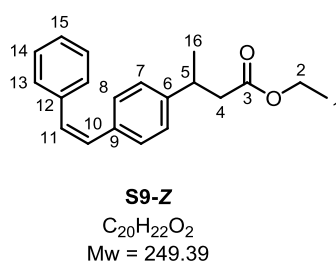

<sup>1</sup>H NMR (500 MHz, CD<sub>2</sub>Cl<sub>2</sub>):  $\delta$  = 1.18 (t, <sup>3</sup>J<sub>1,2</sub> = 7.1 Hz, 3H, H-1), 1.25–1.32 (m, 3H, H-16), 2.45–2.66 (m, 2H, H-4), 3.19–3.34 (m, 1H, H-5), 4.03–4.13 (m, 2H, H-2), 7.13 (m<sub>c</sub>, 2H, H-10/H-11), 7.05–7.53 (m, 9H, H-7/H-8/H-13/H-14/H-15) ppm.

Due to overlaying signals, <sup>13</sup>C signals have not been correlated.

Indicative signals for the alkane product **S10** in the <sup>1</sup>H NMR are at  $\delta$  = 2.89 ppm.

**HRMS** (APCI) for C<sub>20</sub>H<sub>23</sub>O<sub>2</sub><sup>+</sup> [(M+H)<sup>+</sup>] calculated: 295.1693, found: 295.1691.

# <sup>1</sup>H NMR of S9

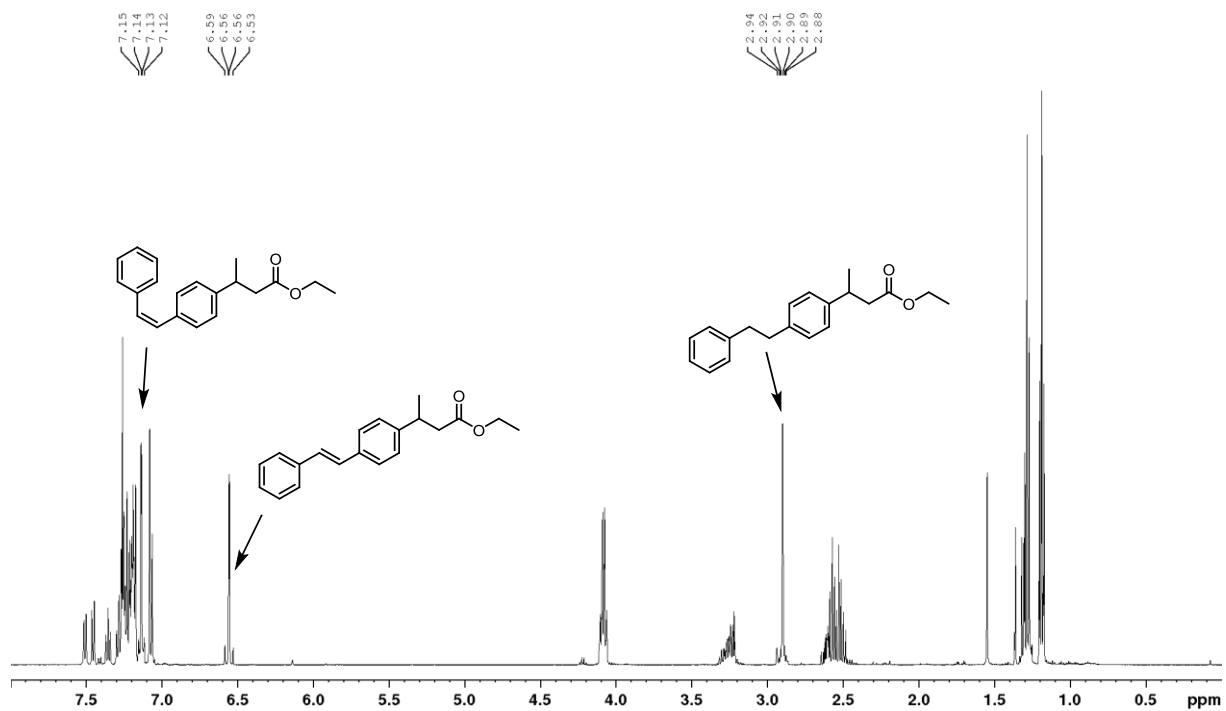



# GC of S9

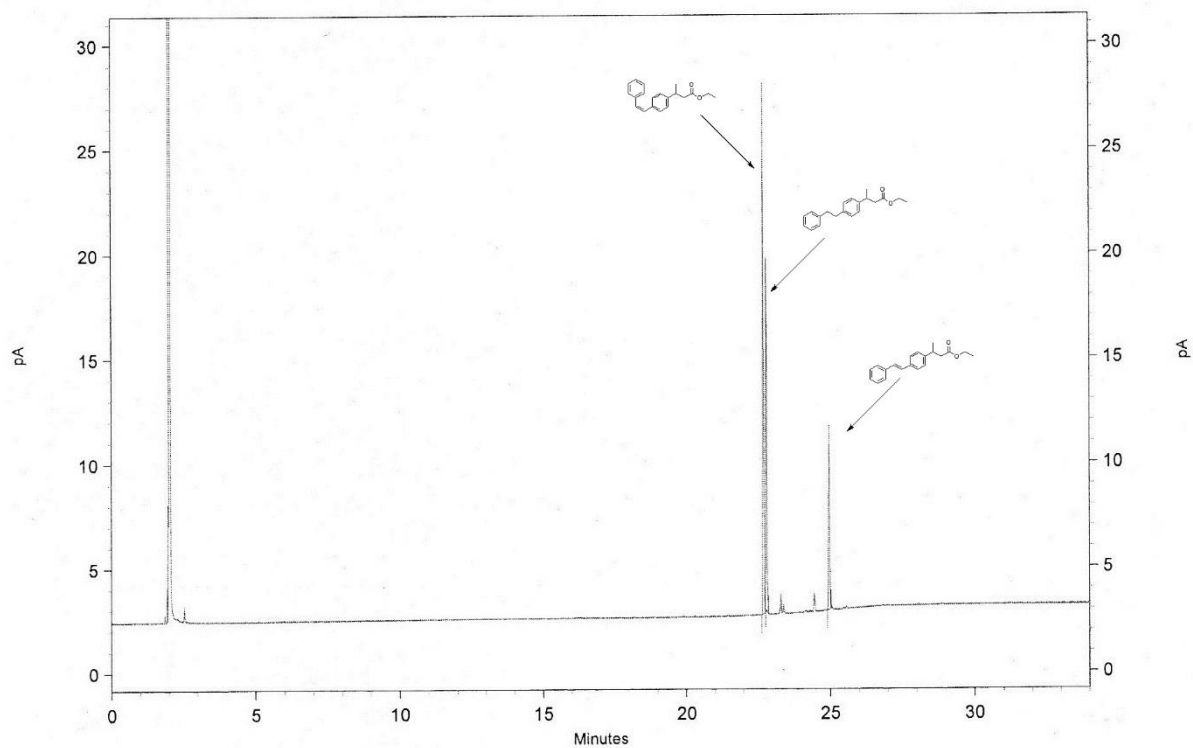

Back  
Signal  
Results

| Peak # | Retention Time | Height | Height Percent | Area   | Area Percent |
|--------|----------------|--------|----------------|--------|--------------|
| 1      | 22,6897        | 195053 | 49,7130        | 429181 | 49,0139      |
| 2      | 22,8000        | 129937 | 33,1170        | 278477 | 31,8030      |
| 3      | 24,9660        | 67368  | 17,1700        | 167974 | 19,1832      |
| Totals |                | 392358 | 100,0000       | 875632 | 100,0000     |

# GC/MS of S9-Z

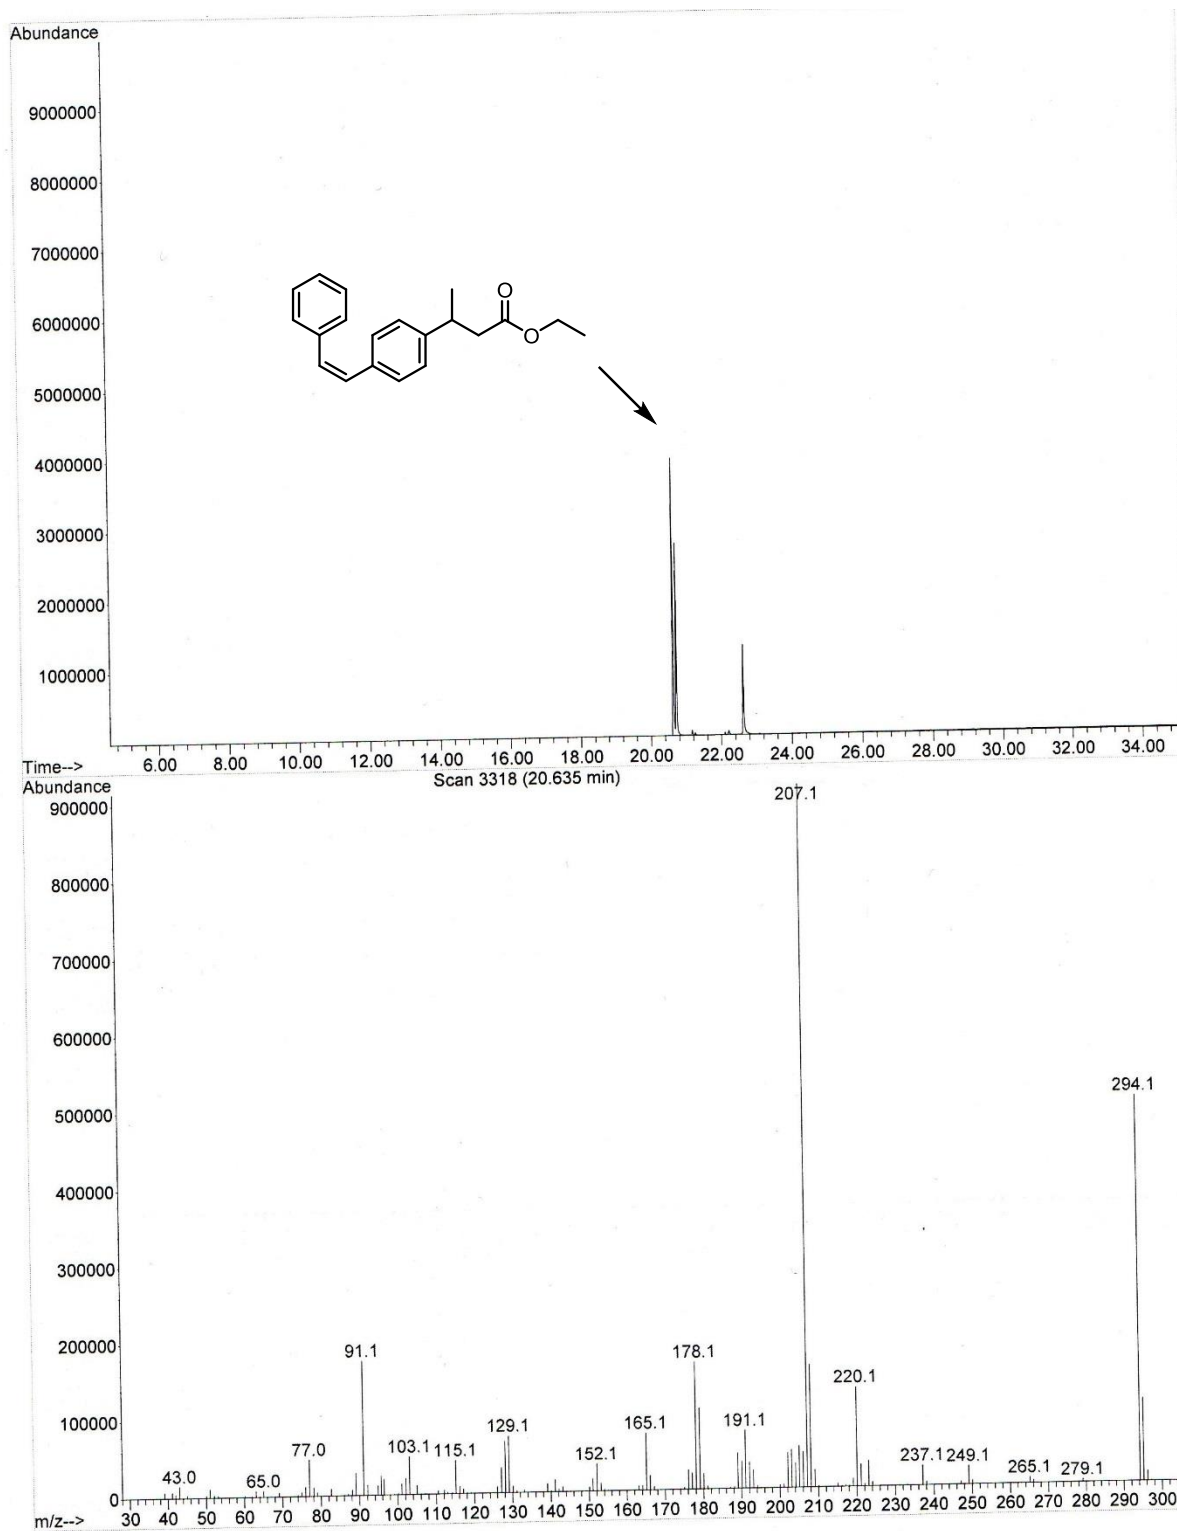

# GC/MS of S10

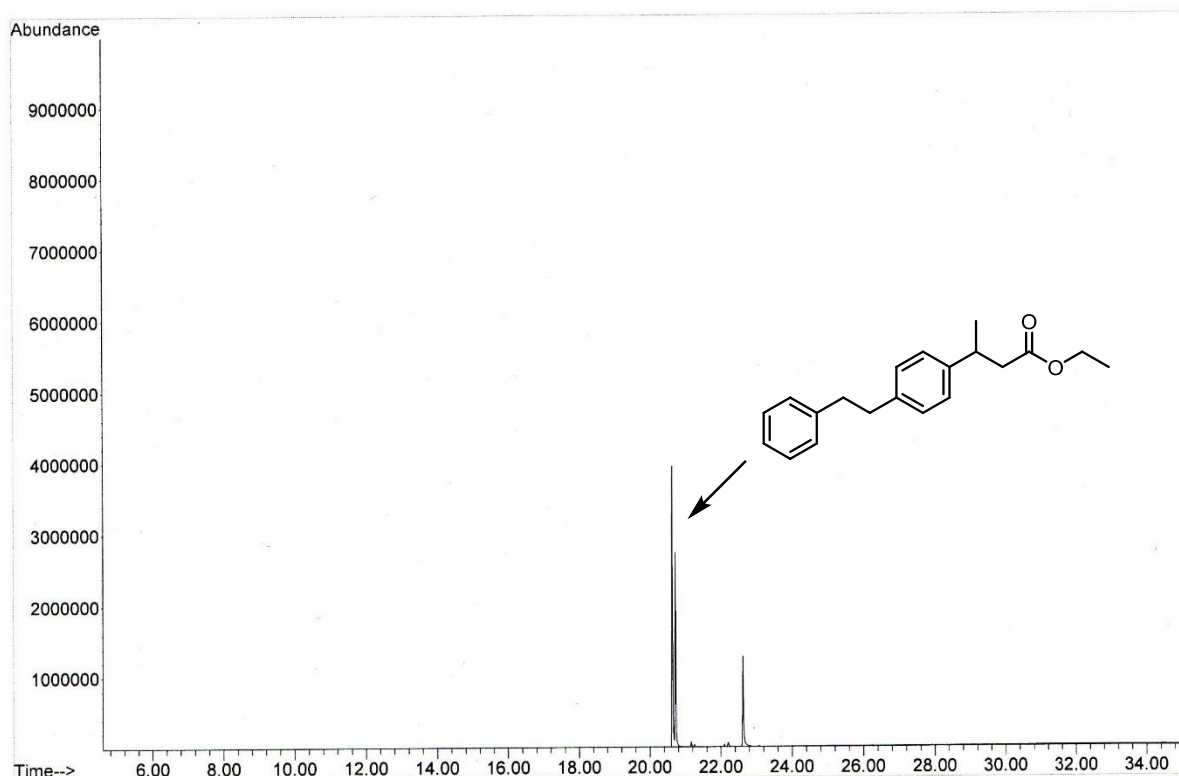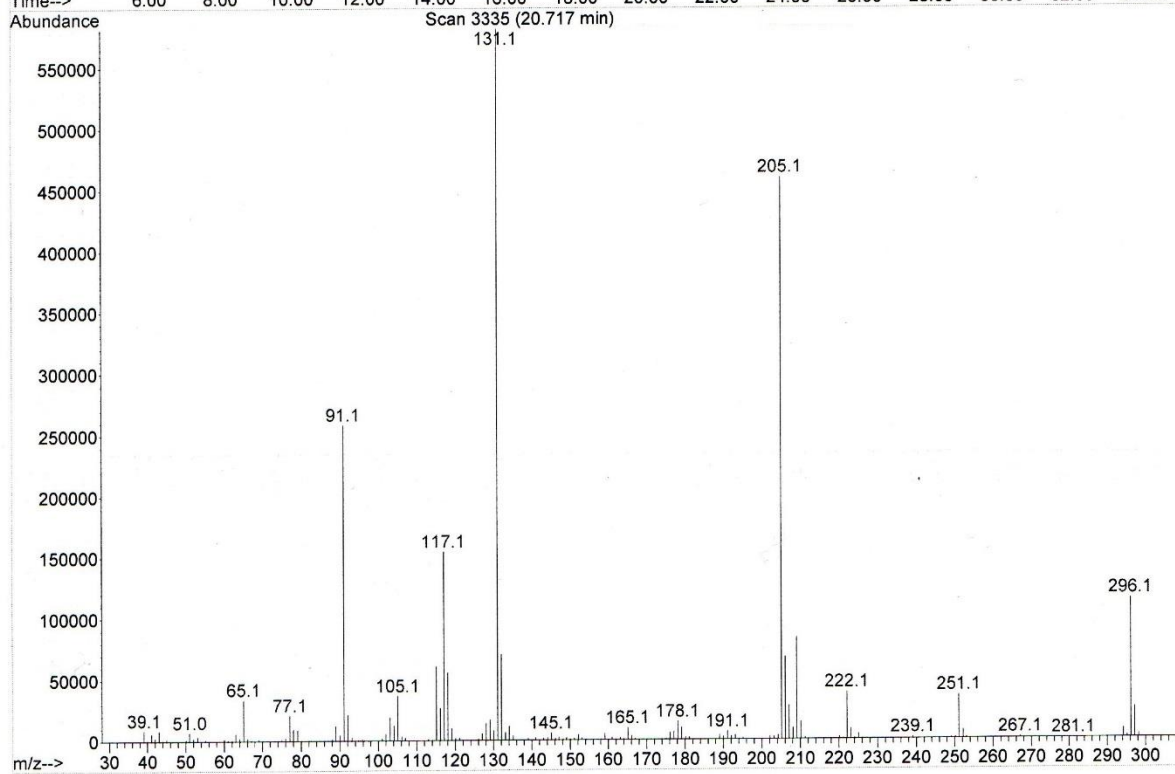

GC/MS of S9-E

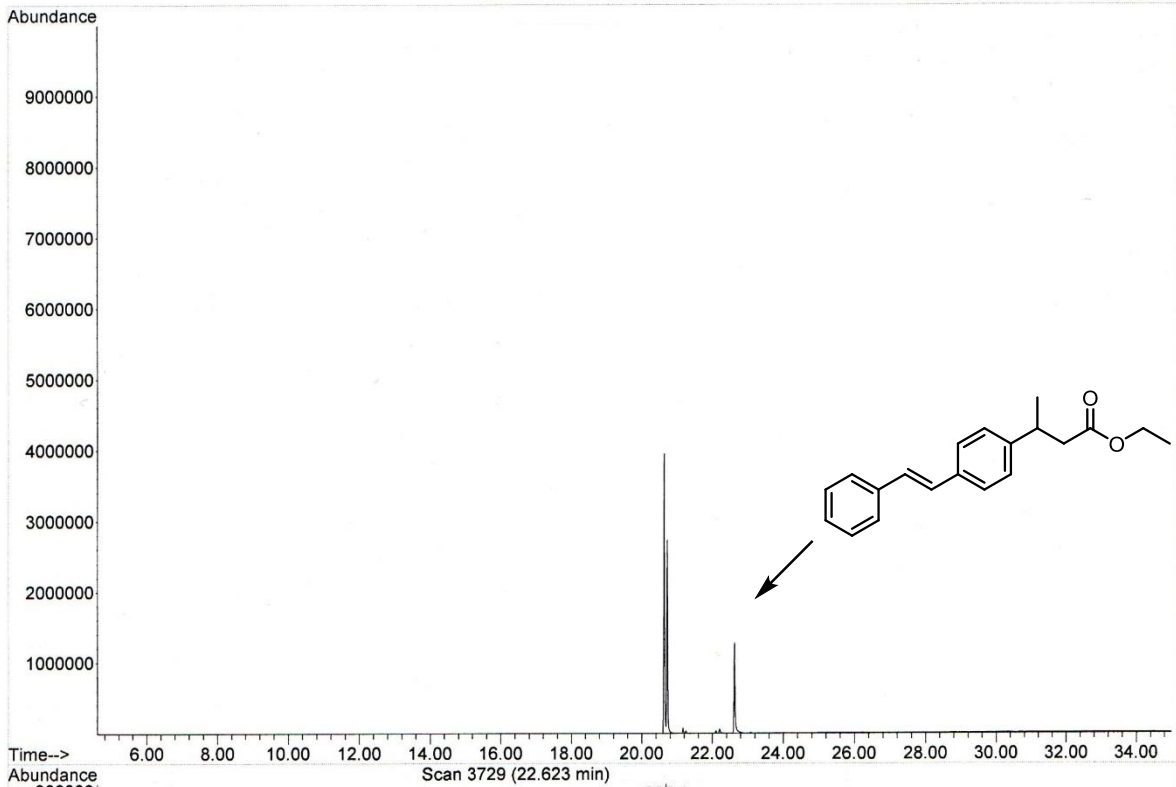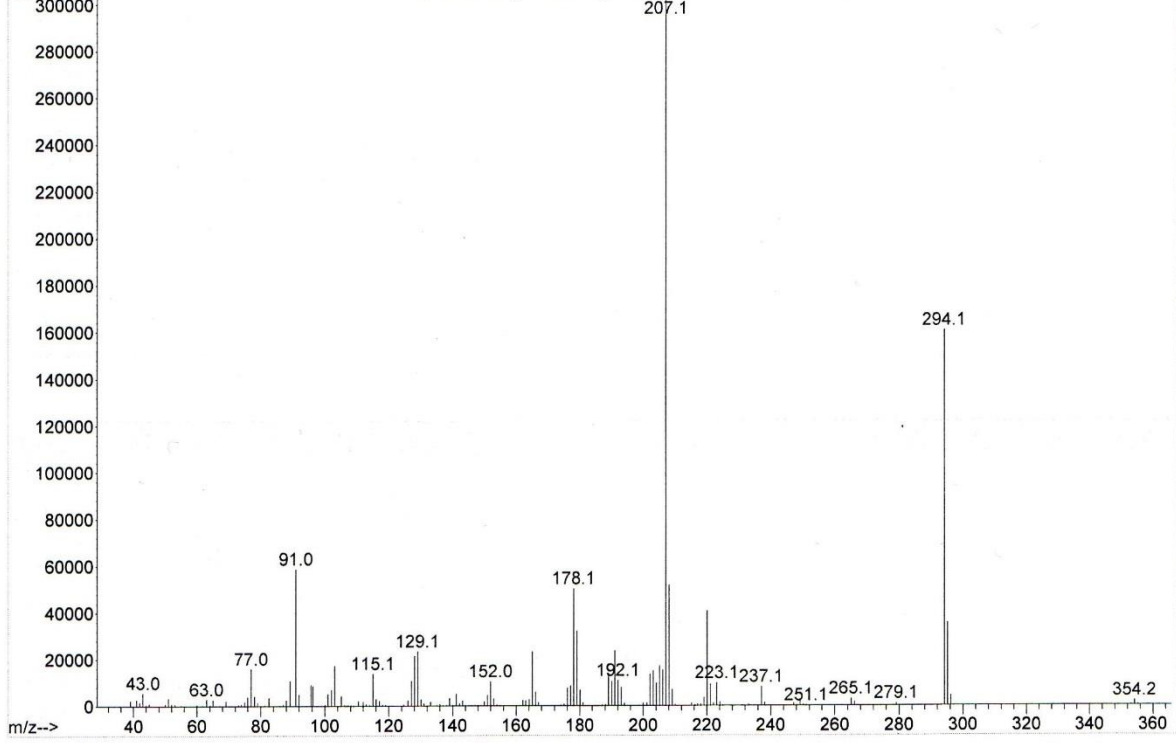

## 4.5 Additives tested in the conjugate reduction

In order to further probe the functional group tolerance of the present protocol, we have added three protic additives (1.0 equivalents with respect to the enoate **1**) to the standard conditions, namely *n*-octanol, benzoic acid and aniline. Robustness and functional group tolerance screening experiments<sup>[32]</sup> were following **GP 2**. Additionally to the substrate 1.00 equiv of an additive was added to the reaction mixture together with the starting material.

**Table S7:** Influence of additives on the catalytic conjugate reduction.<sup>a</sup>

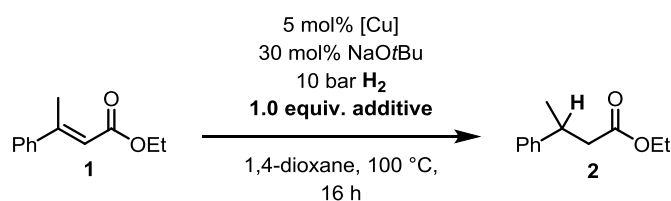

| Entry | Additive     | Conv. <sup>b</sup> [%] | Comments |
|-------|--------------|------------------------|----------|
| 1     | 1-octanol    | 100%                   |          |
| 2     | benzoic acid | -                      | -        |
| 3     | anilin       | 62%                    |          |

<sup>a</sup> All reactions with 5.5  $\mu\text{mol}$  [Cu] in 1 mL solvent. <sup>b</sup> Determined by <sup>1</sup>H NMR spectroscopy or GC analysis. <sup>c</sup> Reaction was performed in an H<sub>2</sub>-purged pressure tube. <sup>d</sup> Isolated yield.

As can be seen from the table, the copper-catalyzed conjugate reduction tolerates the alcohol additive, with full conversion reached, however, we detect 63% of transesterification product (octyl ester).

Addition of the significantly more acidic benzoic acid led to a complete halt of the reaction, most probably due to protonation of the key *tert*-butoxide additive.

The addition of 1.0 equivalents aniline led to significantly lower conversion (only 62% reached), displaying the limits of the present catalyst. A mixture of products was found, including the corresponding reduced and not reduced amides derived from anilin.

## 4.5.1 Analytical data for the additives tested:

### 4.5.1.1 1-Octanol as additive

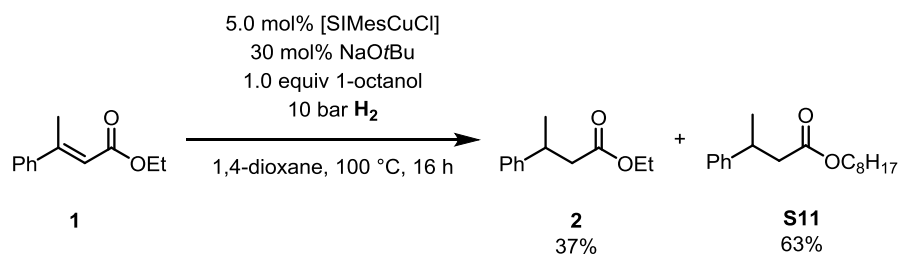

### GC-data

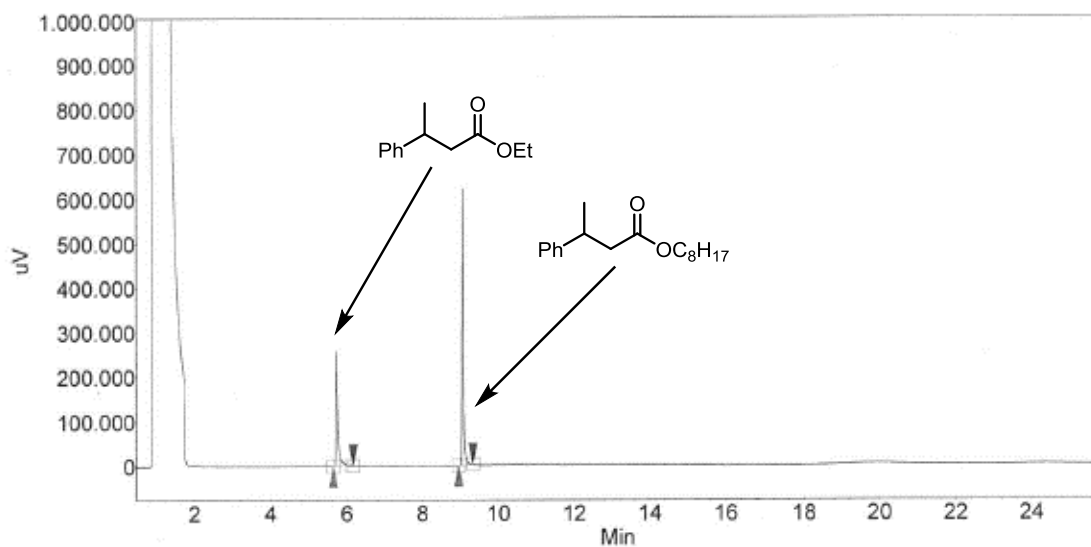

### Peak results :

| Index | Name    | Time [Min] | Quantity [% Area] | Height [uV] | Area [uV.Min] | Area % [%] |
|-------|---------|------------|-------------------|-------------|---------------|------------|
| 1     | UNKNOWN | 5.71       | 36.52             | 259180.5    | 15184.1       | 36.518     |
| 2     | UNKNOWN | 9.06       | 63.48             | 621326.4    | 26395.8       | 63.482     |
| Total |         |            | 100.00            | 880506.9    | 41579.9       | 100.000    |

GC/MS-data

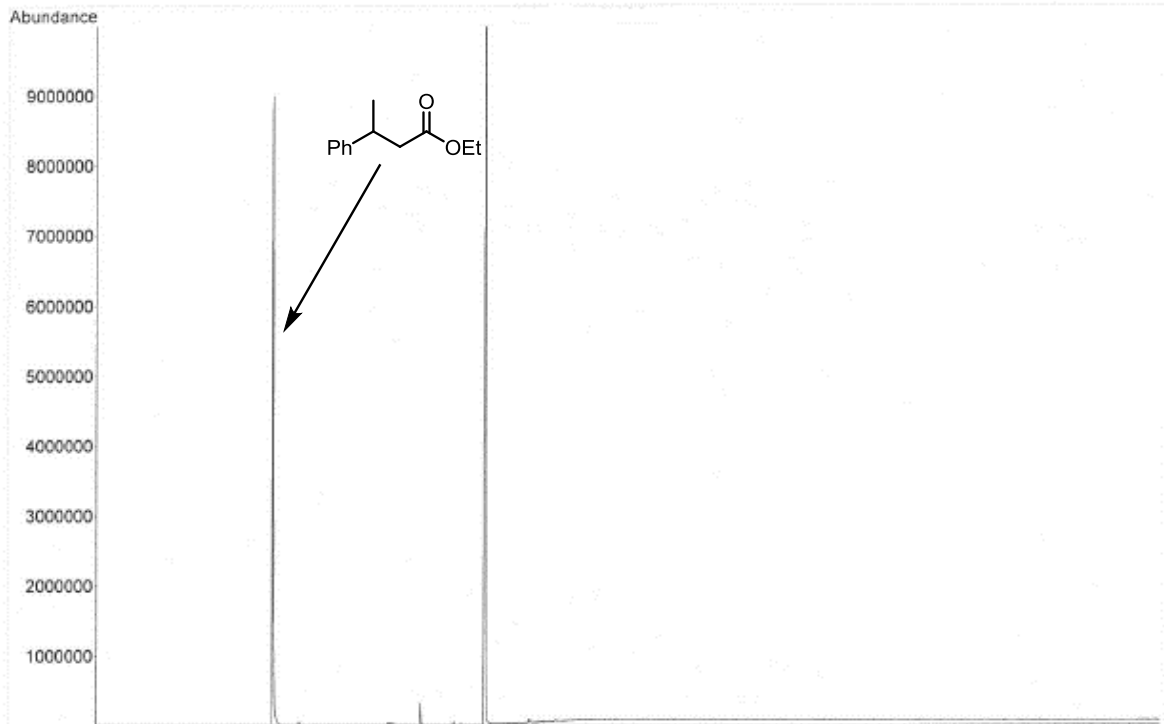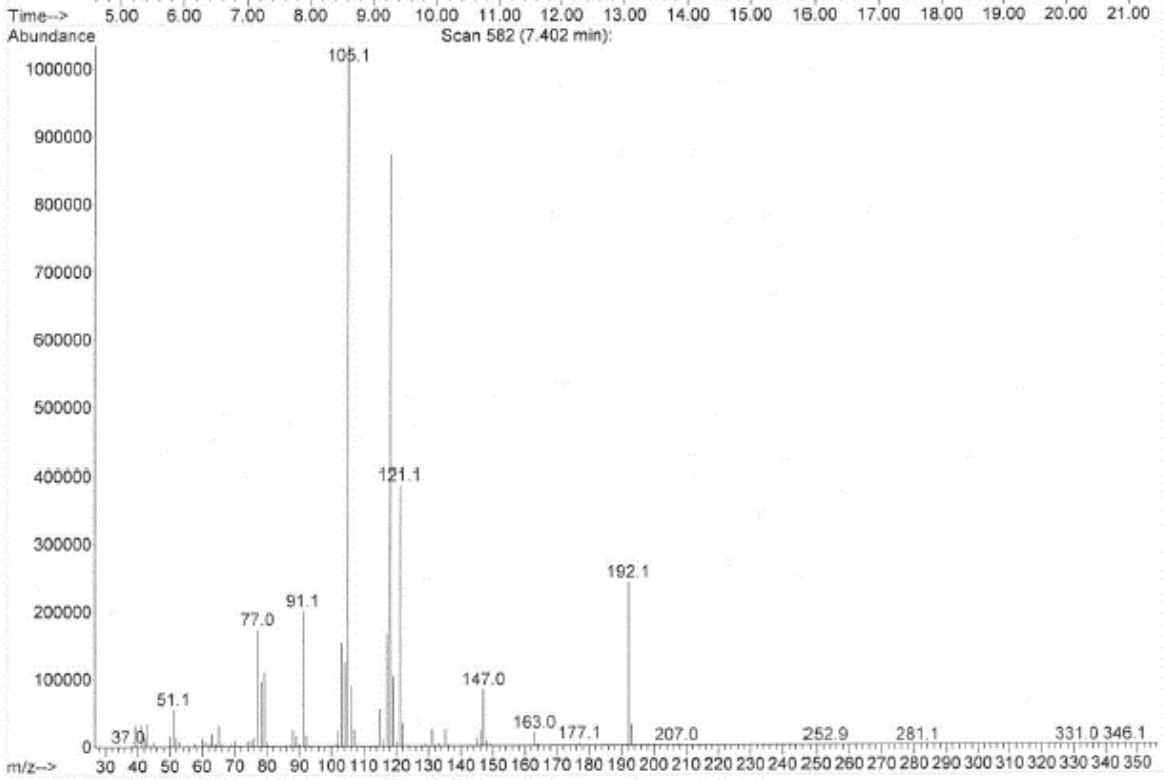

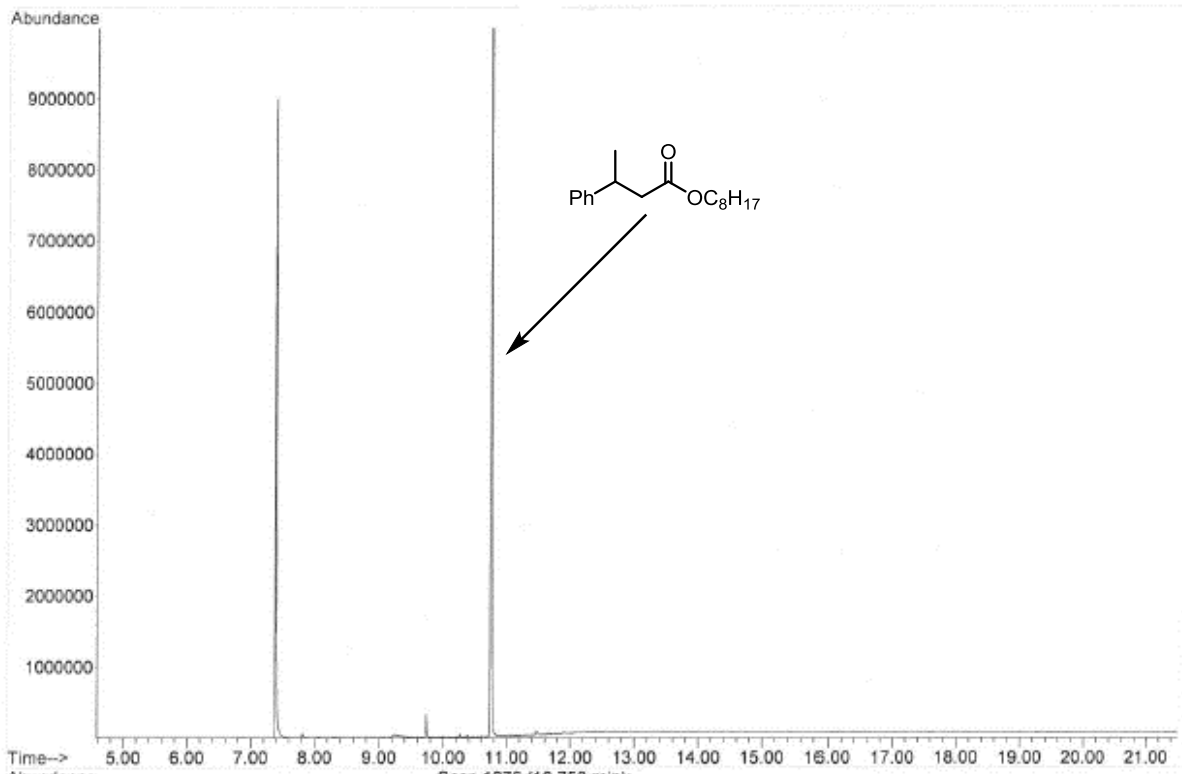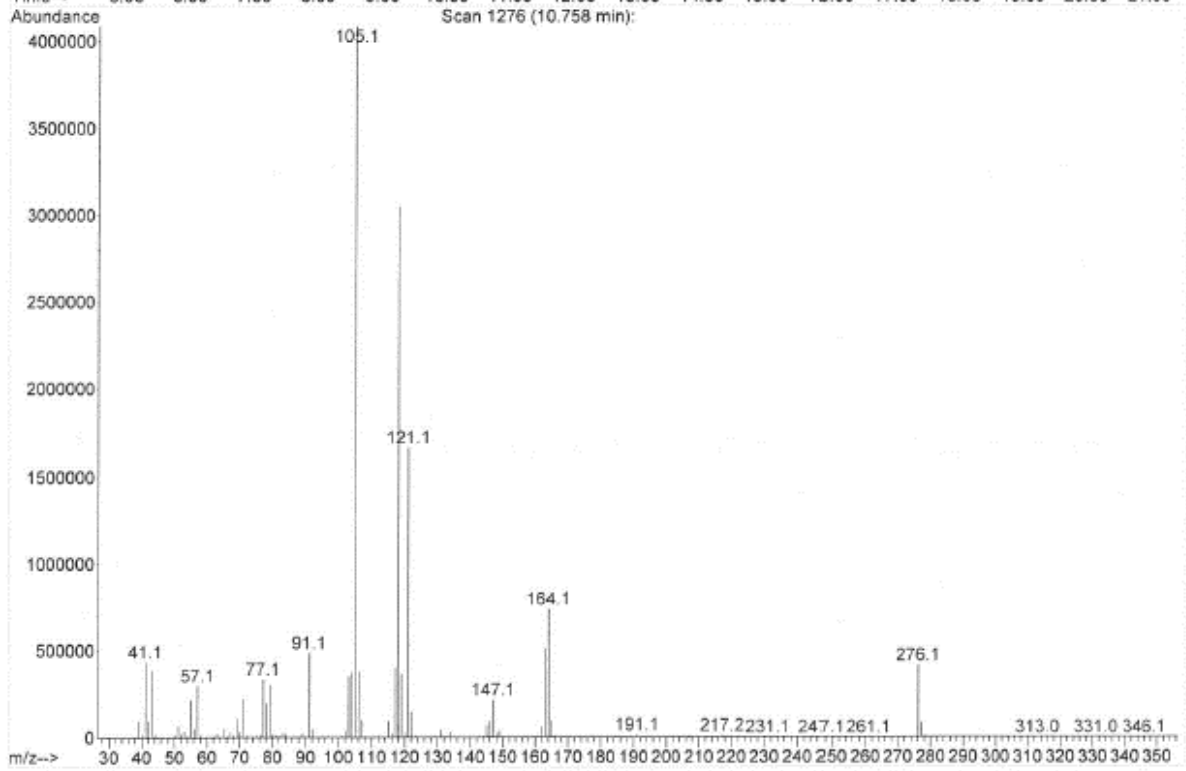



### 4.5.1.2 Benzoic acid as additive

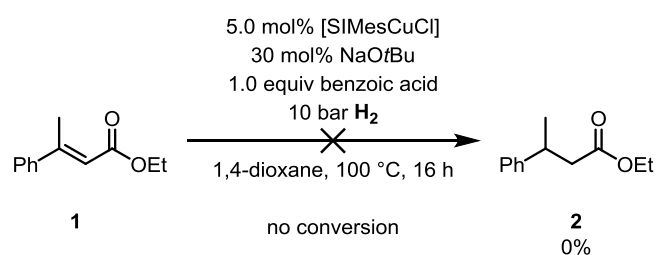

### GC-data

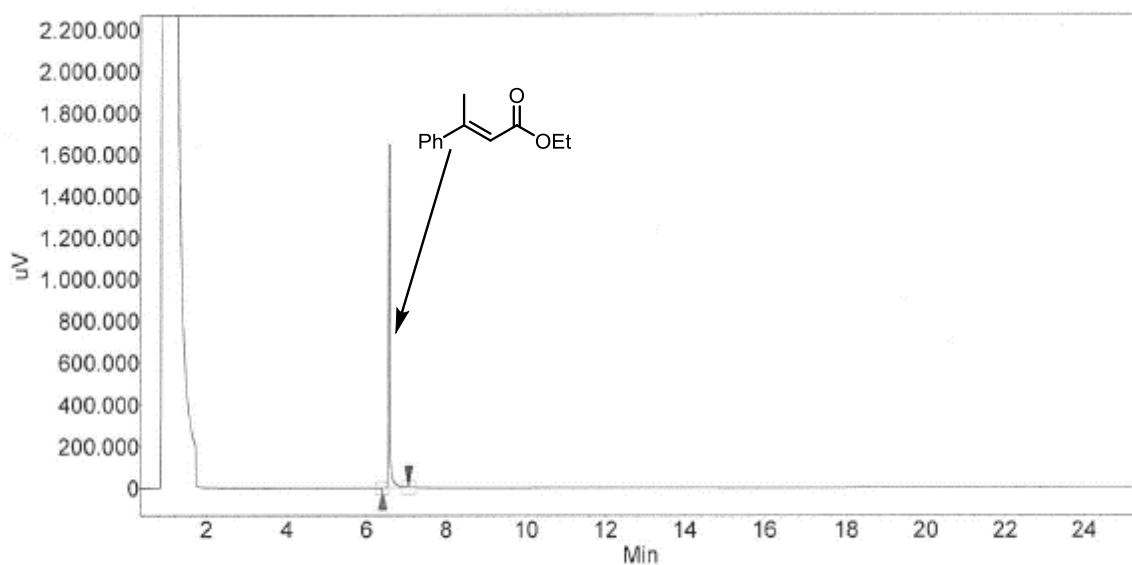

### Peak results :

| Index | Name    | Time [Min] | Quantity [% Area] | Height [uV] | Area [uV.Min] | Area % [%] |
|-------|---------|------------|-------------------|-------------|---------------|------------|
| 1     | UNKNOWN | 6.56       | 100.00            | 1649337.9   | 66134.0       | 100.000    |
| Total |         |            | 100.00            | 1649337.9   | 66134.0       | 100.000    |

### GC/MS-data

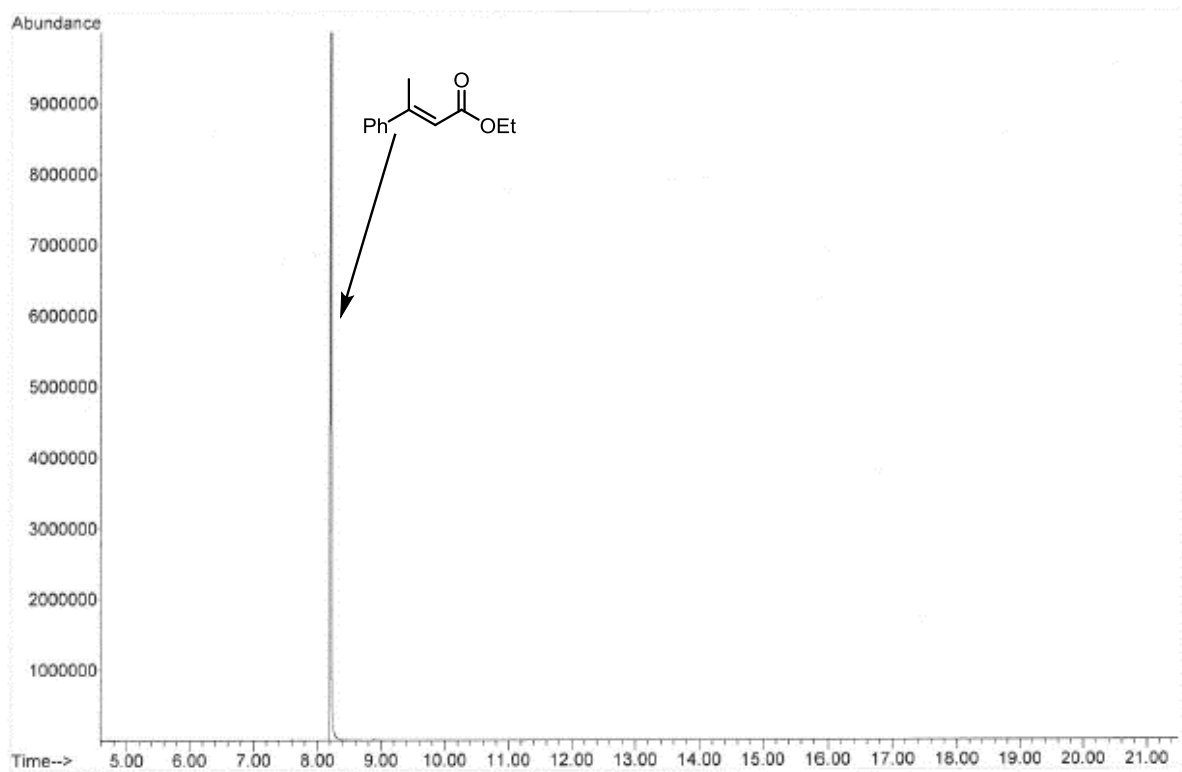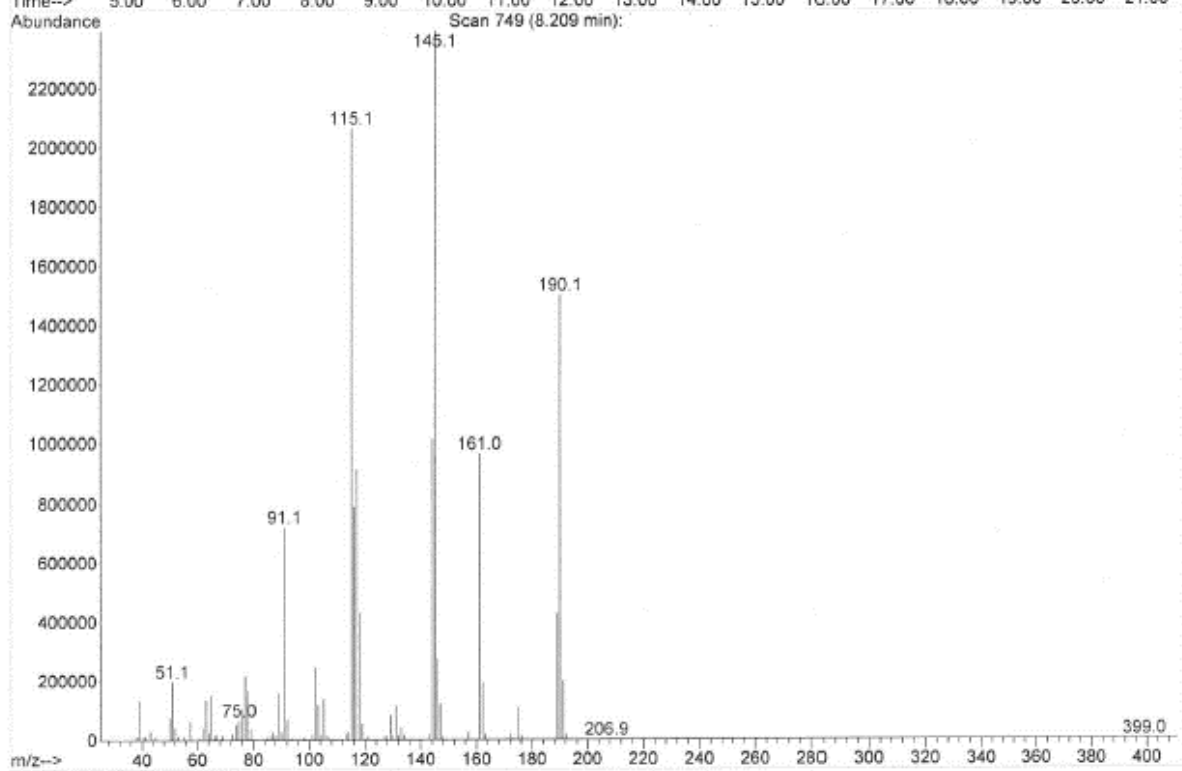

### 4.5.1.3 Anilin as additive

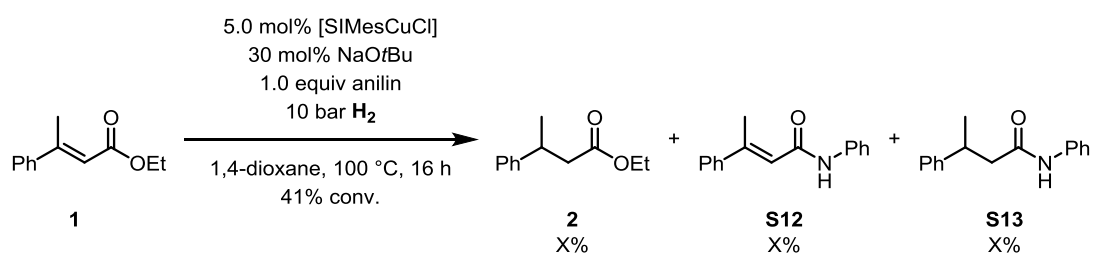

### GC-data

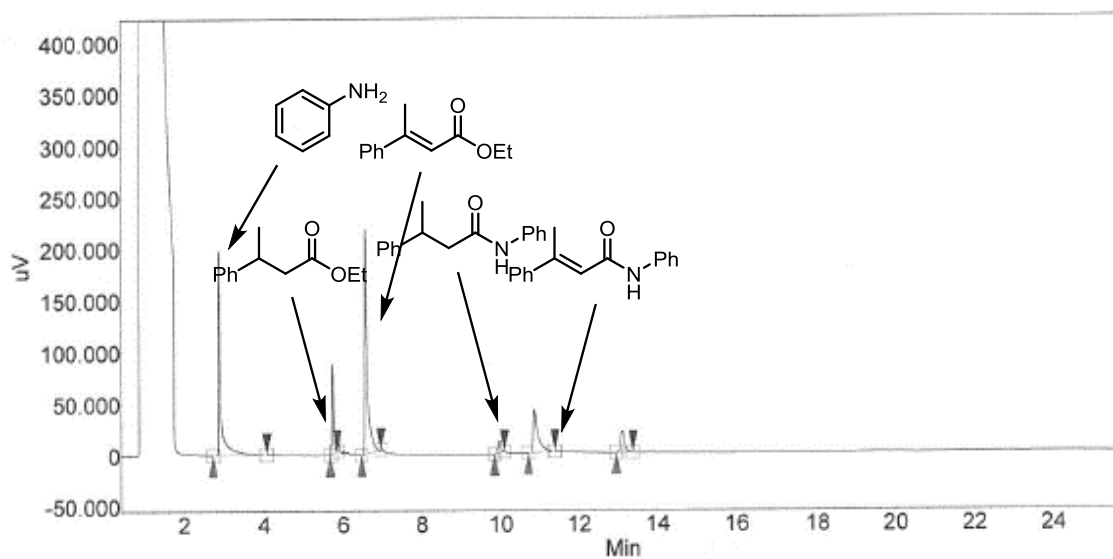

### Peak results :

| Index | Name    | Time [Min] | Quantity [% Area] | Height [uV] | Area [uV.Min] | Area % [%] |
|-------|---------|------------|-------------------|-------------|---------------|------------|
| 1     | UNKNOWN | 2.88       | 29.90             | 198626.2    | 12051.3       | 29.902     |
| 5     | UNKNOWN | 5.73       | 9.59              | 86987.7     | 3865.8        | 9.592      |
| 4     | UNKNOWN | 6.55       | 38.24             | 218050.0    | 15413.5       | 38.244     |
| 6     | UNKNOWN | 9.96       | 2.49              | 12578.6     | 1001.6        | 2.485      |
| 3     | UNKNOWN | 10.85      | 13.69             | 42289.7     | 5518.3        | 13.692     |
| 2     | UNKNOWN | 13.09      | 6.09              | 21185.8     | 2452.6        | 6.085      |
| Total |         |            | 100.00            | 579718.1    | 40303.1       | 100.000    |

### GC-MS data

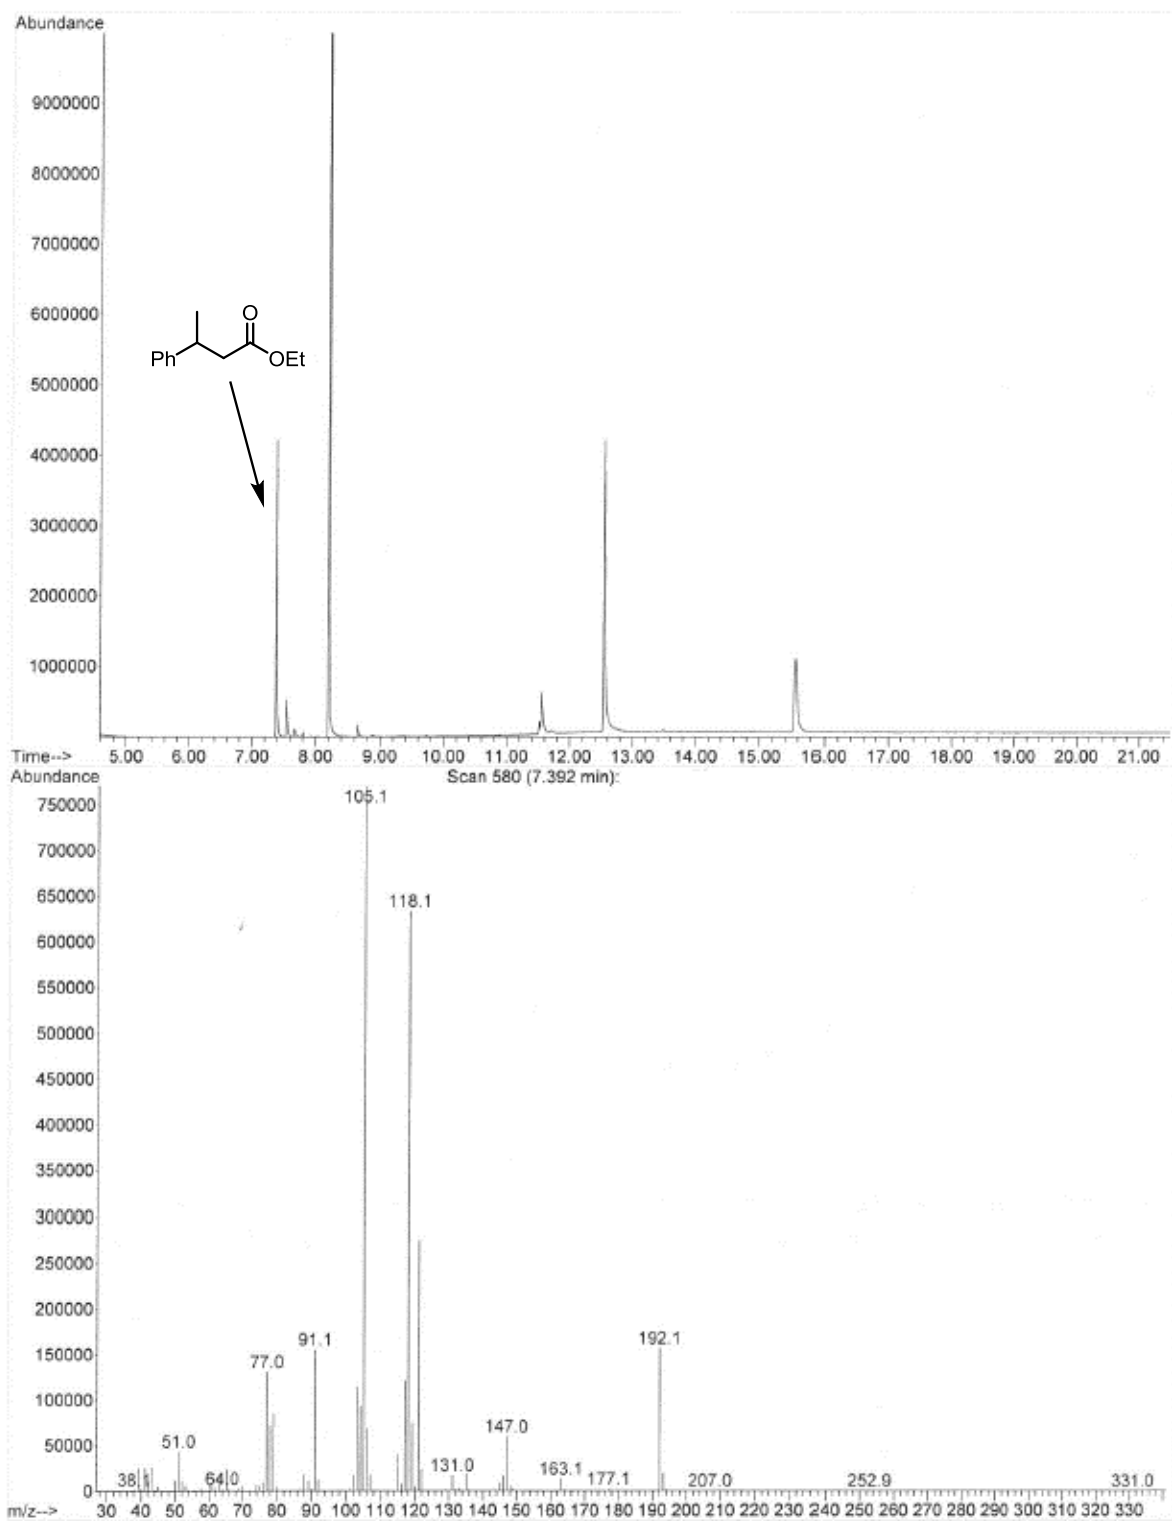

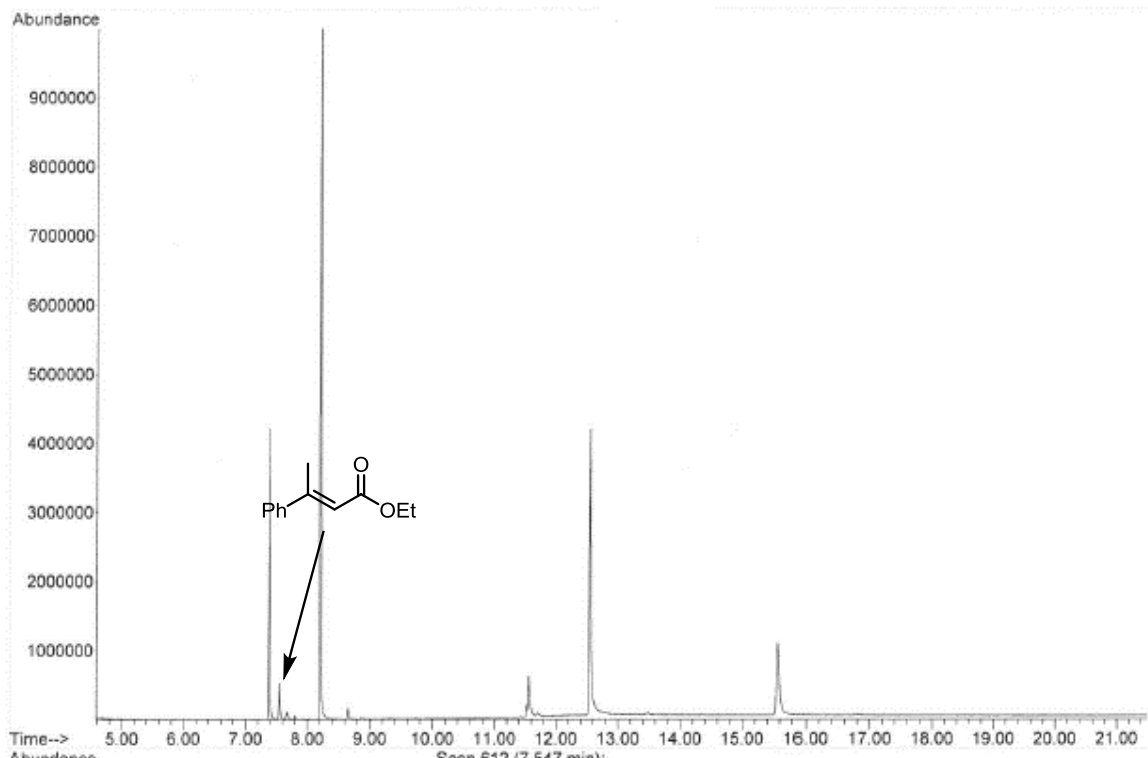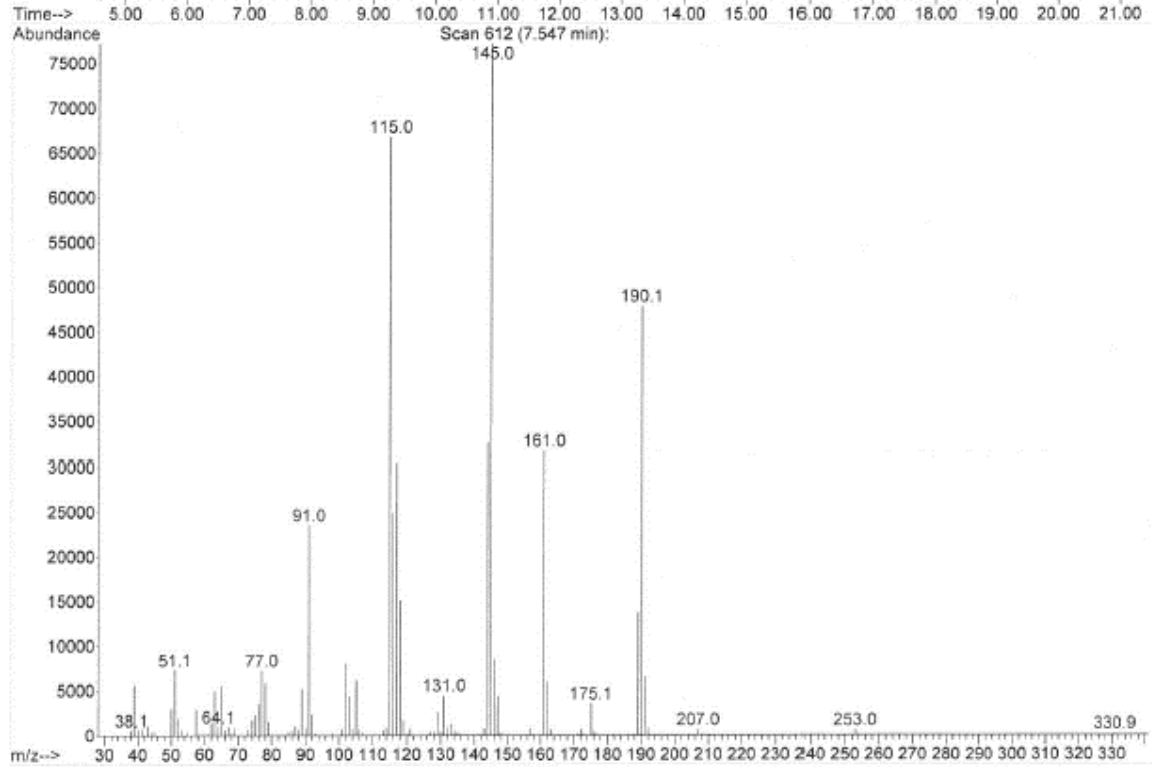

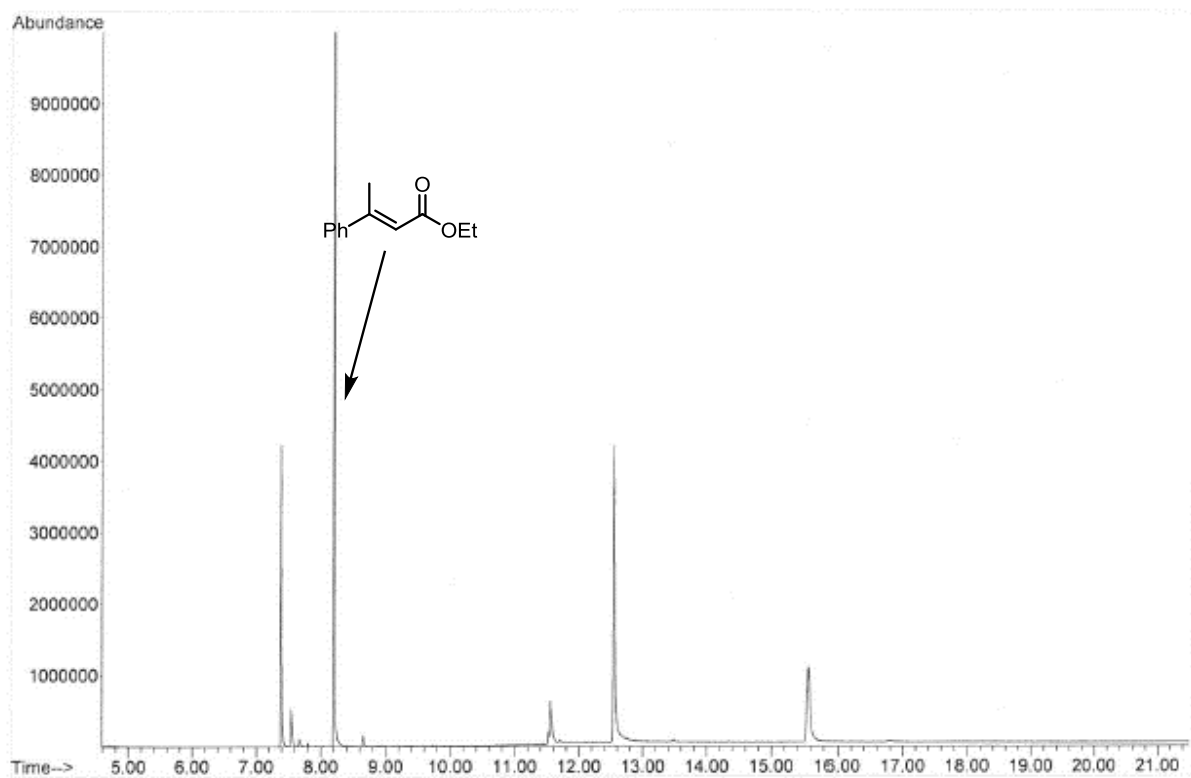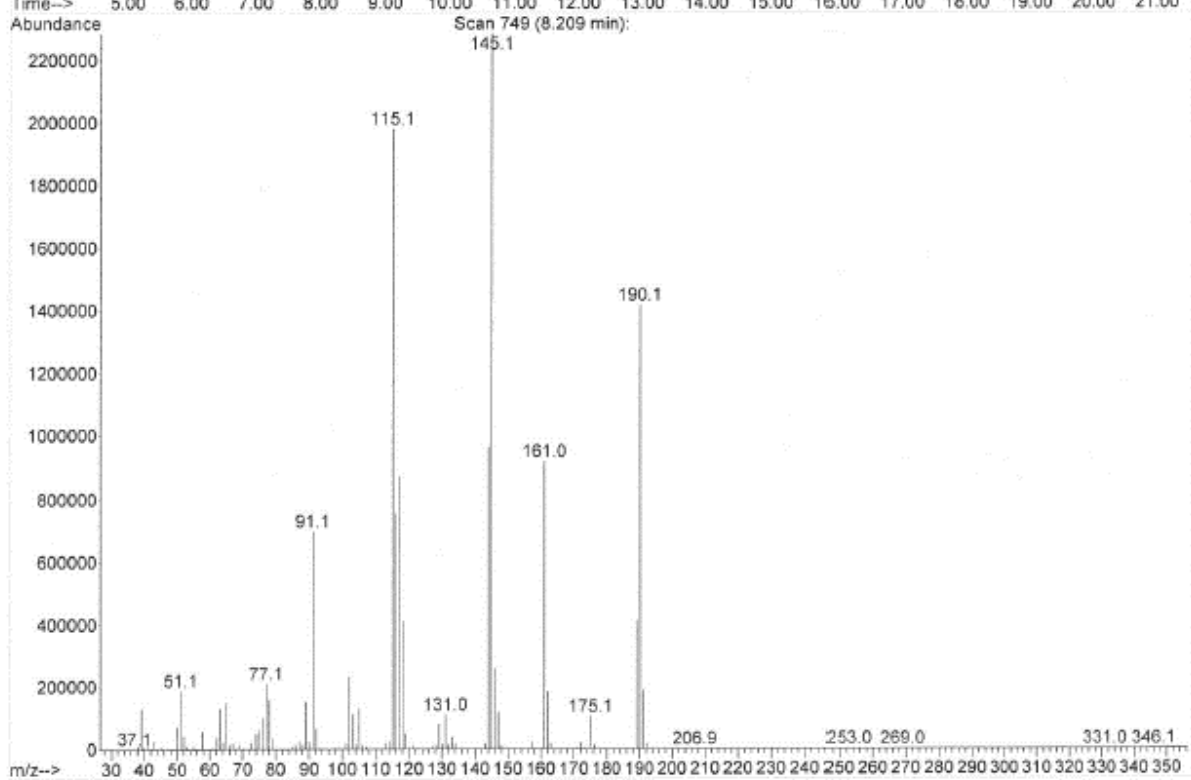

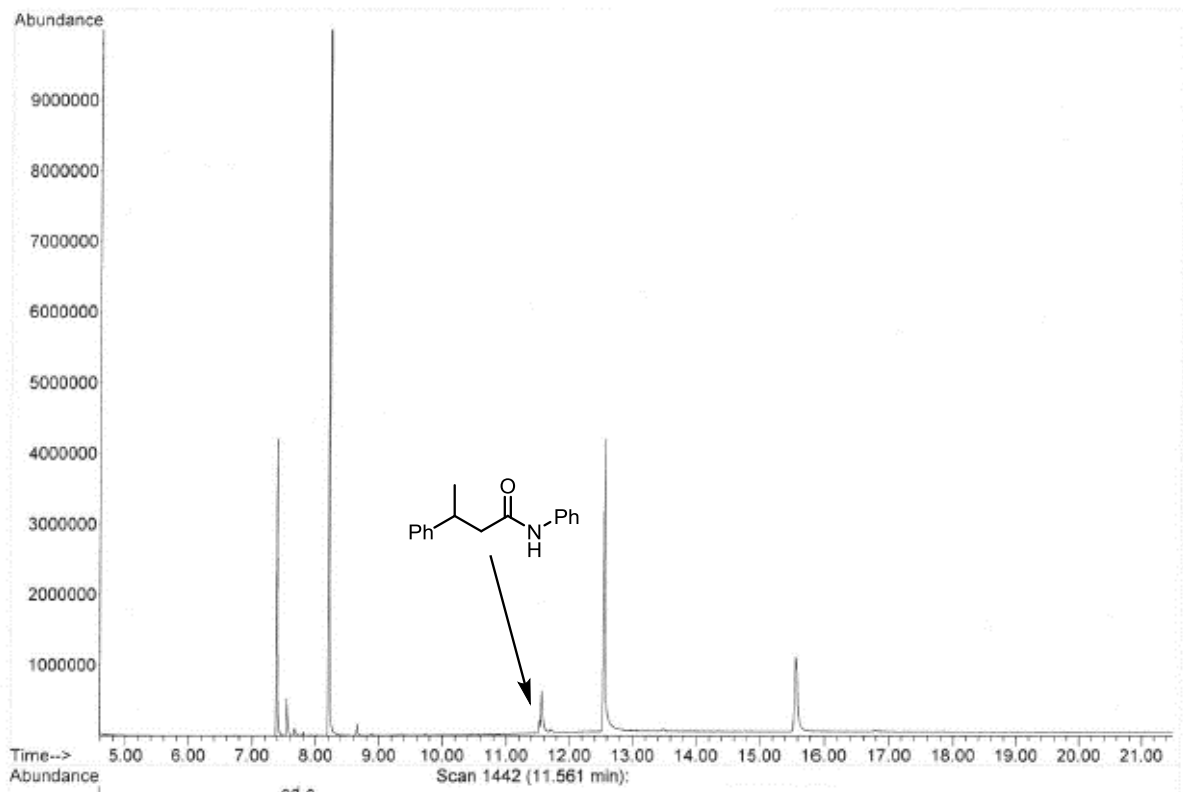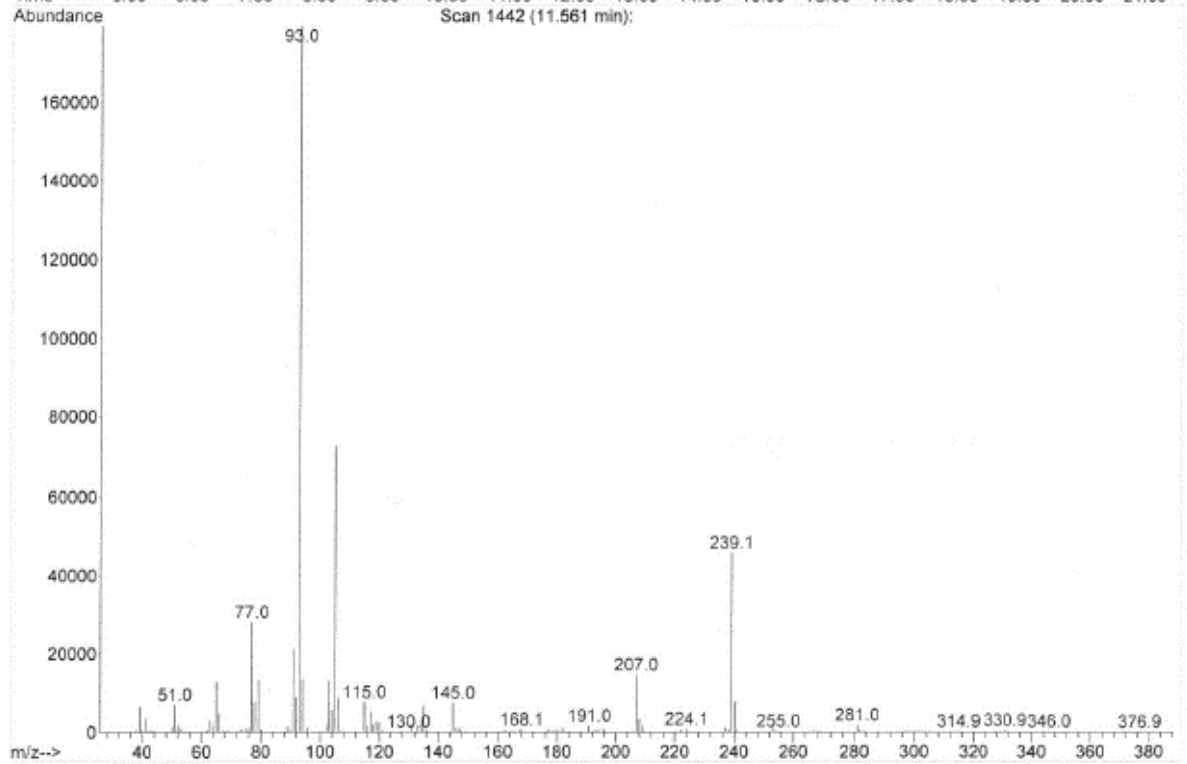

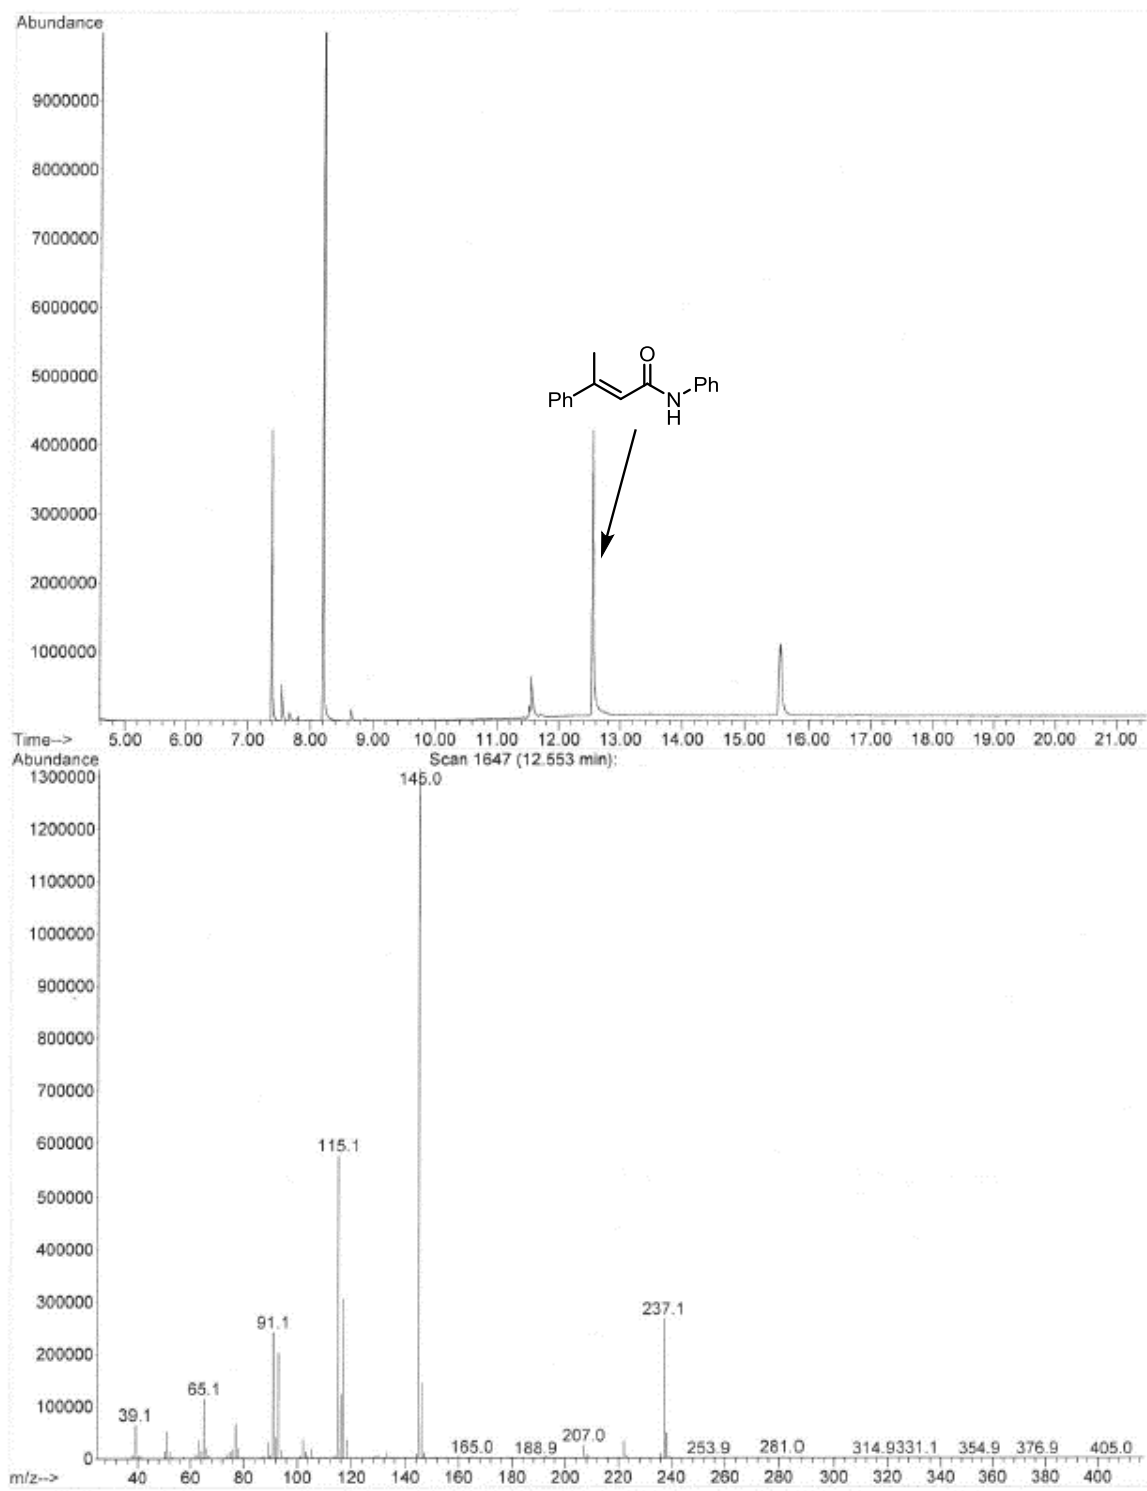



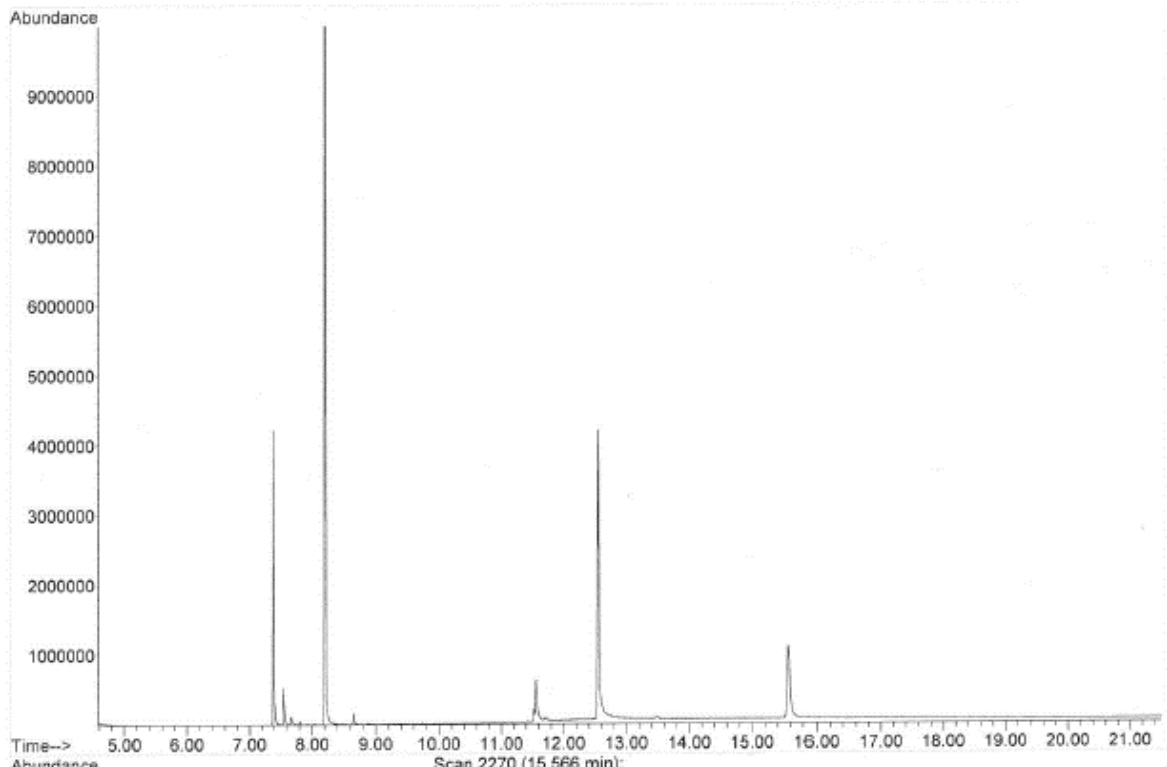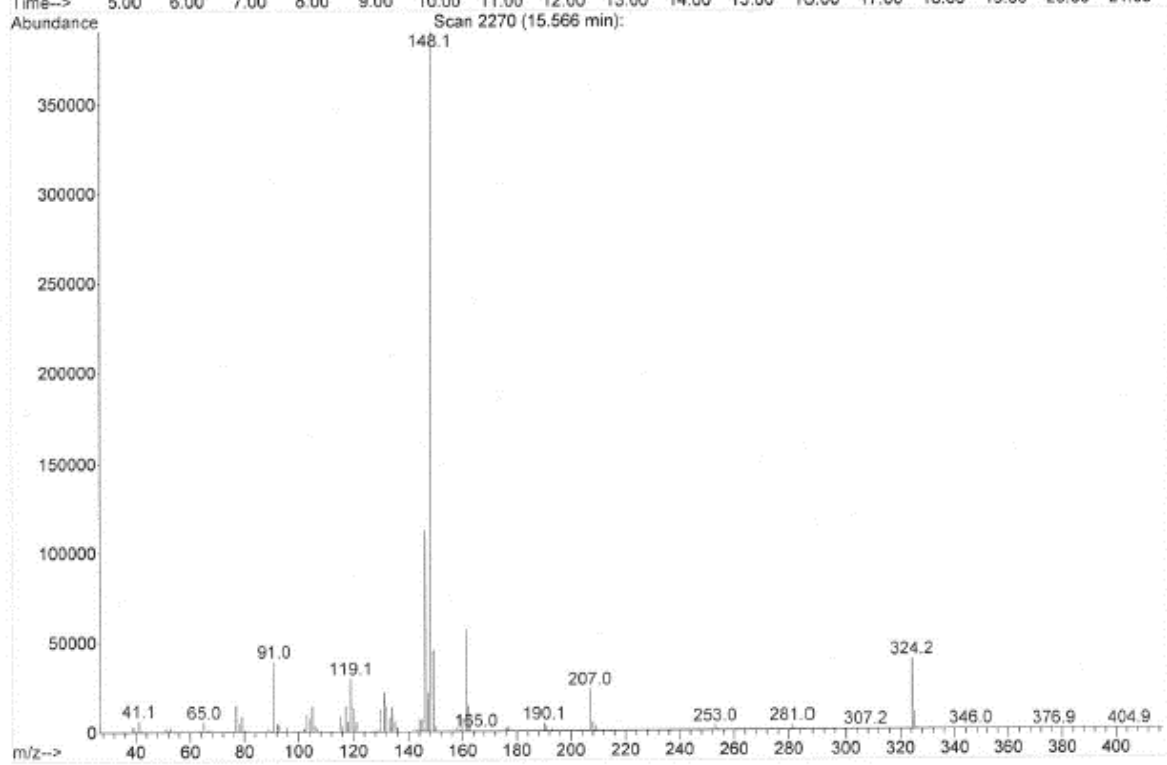

## 4.6 Deuteration experiments

Deuteration experiments were following **GP 2** using D<sub>2</sub> instead of H<sub>2</sub>.

Deuterium incorporation was determined *via* quantitative <sup>1</sup>H NMR and comparison of two selected <sup>1</sup>H NMR signals (relaxation delay (d<sub>1</sub>), and selected <sup>1</sup>H NMR signals with the respective substrates).

### 4.6.1 Ethyl 3-phenylbutanoate-d<sub>n</sub> (**2-d<sub>n</sub>**)

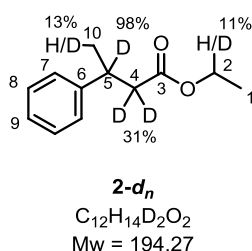

Prepared according to **GP2** from ethyl (*E*)-3-phenylbut-2-enoate (**1**, 48 mg, 0.25 mmol, 1.0 equiv), [SiMesCuCl] (**6**, 10 mg, 25 μmol, 10 mol%) and NaOtBu (14 mg, 0.15 mmol, 30 mol%) in 1,4-dioxane (1.5 mL). The reaction mixture was stirred for 48 h at 100 °C. Purification by flash column chromatography on silica gel (*n*-pentane/*tert*-butyl methyl ether = 50:1) yielded **2-d<sub>n</sub>** as a colorless oil (38.6 mg, 0.198 mmol, 79%).

R<sub>f</sub> = 0.48 (SiO<sub>2</sub>, cyclohexane/*tert*-butyl methyl ether = 9:1).

<sup>1</sup>H NMR (700 MHz, CDCl<sub>3</sub>): δ = 1.15–1.20 (m, 2.9H, H-1), 1.26–1.30 (m, 2.6H, H-10), 2.49–2.63 (m, 1.4H, H-4), 4.07 (m<sub>c</sub>, 1.8H, H-2), 7.17–7.24 (m, 3H, H-7, H-9), 7.27–7.32 (m, 2H, H-8) ppm.

<sup>2</sup>H NMR (77 MHz, CDCl<sub>3</sub>): δ = 1.30 (s, D-10), 2.55 (m<sub>c</sub>, D-4), 3.25 (s, D-5), 4.07 (s, D-2) ppm.

<sup>13</sup>C NMR (126 MHz, CDCl<sub>3</sub>): δ = 14.3 (C-1), 21.8 (C-10), 36.6 (C-5), 43.1 (C-4), 60.3 (C-2), 126.4 (C-7)\*, 126.8 (C-9)\*, 128.5 (C-8), 145.8 (C-6), 172.5 (C-3) ppm. Due to low concentration C-5 could not be detected in <sup>13</sup>C NMR but was identified *via* coupling in HMBC.

**HRMS** (APCI) for C<sub>12</sub>H<sub>15</sub>D<sub>2</sub>O<sub>2</sub><sup>+</sup> [(M-D+2H)<sup>+</sup>] calculated: 195.1349, found: 195.1344.

**IR** (ATR):  $\tilde{\nu}$  = 2974 (w), 1729 (s), 1603 (w), 1493 (w), 1446 (m), 1367 (m), 1324 (m), 1246 (m), 1178 (s), 1094 (m), 1031 (s), 909 (w), 849 (w), 755 (m), 697 (s) cm<sup>-1</sup>.

The deuterium incorporation was determined by comparing the integrals of the corresponding <sup>1</sup>H NMR signal H-2 (δ = 4.07 ppm), H-4 (δ = 2.49–2.63 ppm), H-5 (δ = 3.27 ppm) and H-10 (δ = 1.26–1.30 ppm) with H-7/H-9 (δ = 7.17–7.24 ppm) [<sup>1</sup>H NMR (700 MHz, CDCl<sub>3</sub>), d<sub>1</sub> = 23 s].

### 4.6.2 Ethyl 3,3-diphenylpropanoate-d<sub>n</sub> (**9c-d<sub>n</sub>**)

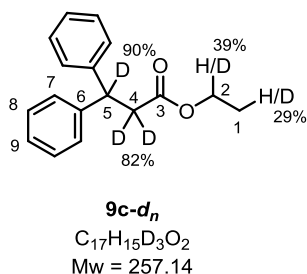

Prepared according to **GP2** from ethyl ethyl 3,3-diphenylacrylate (**8c**, 63 mg, 0.25 mmol, 1.0 equiv), [SiMesCuCl] (**6**, 10 mg, 25 μmol, 10 mol%) and NaOtBu (14 mg, 0.15 mmol, 30 mol%) in

1,4-dioxane (1.5 mL). The reaction mixture was stirred for 48 h at 100 °C. Purification by flash column chromatography on silica gel (*n*-pentane/*tert*-butyl methyl ether = 50:1) yielded **9c-d<sub>n</sub>** as a colorless oil (48.5 mg, 0.188 mmol, 75%).

$R_f = 0.40$  (SiO<sub>2</sub>, cyclohexane/*tert*-butyl methyl ether = 9:1).

<sup>1</sup>H NMR (700 MHz, CDCl<sub>3</sub>): δ = 1.03–1.13 (m, 2.1H, H-1), 3.01–3.05 (m, 0.4H, H-4), 3.98–4.05 (m, 1.2H, H-2), 7.16–7.20 (m, 2H, H-9), 7.22–7.25 (m, 4H, H-7)\*, 7.26–7.29 (m, 4H, H-8)\* ppm.

<sup>2</sup>H NMR (77 MHz, CDCl<sub>3</sub>): δ = 1.15 (s, D-1), 1.27 (s, D-11), 2.51 (m<sub>c</sub>, D-4), 3.21 (s, D-5), 4.07 (s, D-2) ppm.

<sup>13</sup>C NMR (126 MHz, CDCl<sub>3</sub>): δ = 14.5 (C-1), 41.0 (C-4), 46.7 (C-5), 60.5 (C-2), 126.6 (C-9), 127.8 (C-7), 128.6 (C-8), 128.9 (C-6), 143.5 (C-6), 171.9 (C-3) ppm.

Due to low concentration C-1, C-4, C-5 and C-2 could not be detected in <sup>13</sup>C NMR but were identified *via* coupling in HMQC and HMBC.

HRMS (APCI) for C<sub>17</sub>H<sub>16</sub>D<sub>3</sub>O<sub>2</sub><sup>+</sup> [(M+H)<sup>+</sup>] calculated: 258.1568, found: 258.1562.

IR (ATR):  $\tilde{\nu} = 3024$  (w), 2978 (w), 2127 (w), 1726 (s), 1599 (w), 1492 (m), 1446 (m), 1351 (w), 1259 (s), 1174 (w), 1122 (m), 1024 (m), 909 (w), 741 (m), 696 (s) cm<sup>-1</sup>.

The deuterium incorporation was determined by comparing the integrals of the corresponding <sup>1</sup>H NMR signal H-1 (δ = 1.03–1.13 ppm), H-2 (δ = 3.98–4.05 ppm), H-4 (δ = 3.01–3.05 ppm) and H-5 (δ = 4.53–4.55 ppm) with H-9 (δ = 7.16–7.20 ppm) [<sup>1</sup>H NMR (700 MHz, CDCl<sub>3</sub>), d<sub>1</sub> = 21 s].

#### 4.6.3 Ethyl 3-(4-methoxyphenyl)butanoate-2,2,3-d<sub>3</sub> (**9d-d<sub>n</sub>**)

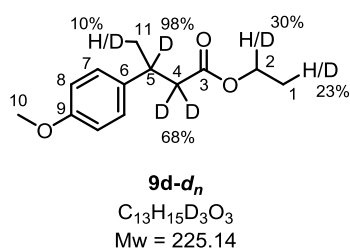

Prepared according to **GP2** from ethyl (*E*)-3-(4-methoxyphenyl)but-2-enoate (**8d**, 55 mg, 0.25 mmol, 1.0 equiv), [SiMesCuCl] (**6**, 10 mg, 25 μmol, 10 mol%) and NaOtBu (14 mg, 0.15 mmol, 30 mol%) in 1,4-dioxane (1.5 mL). The reaction mixture was stirred for 48 h at 100 °C. Purification by flash column chromatography on silica gel (*n*-pentane/*tert*-butyl methyl ether = 30:1) yielded **9d-d<sub>n</sub>** as a colorless oil (41.4 mg, 0.184 mmol, 74%).

$R_f = 0.26$  (SiO<sub>2</sub>, cyclohexane/*tert*-butyl methyl ether = 9:1).

<sup>1</sup>H NMR (700 MHz, CDCl<sub>3</sub>): δ = 1.14–1.20 (m, 2.3H, H-1), 1.23–1.28 (m, 2.7H, H-11), 2.45–2.57 (m, 0.6H, H-4), 3.78 (s, 3H, H-10), 4.01–4.10 (m, 1.4H, H-2), 6.83 (m<sub>c</sub>, 2H, H-8), 7.13 (m<sub>c</sub>, 2H, H-7) ppm.

**<sup>13</sup>C NMR** (125 MHz, CD<sub>2</sub>Cl<sub>2</sub>): δ = 13.2–14.5 (m, C-1), 21.4–22.3 (m, C-11), 35.2–36.0 (m, C-5), 42.3–43.4 (m, C-4), 55.5 (C-10), 59.7–60.7 (m, C-2), 114.1 (C-8), 128.0 (C-7), 138.3 (C-6), 158.5 (C-9), 172.5 (C-3) ppm.

**<sup>2</sup>H NMR** (77 MHz, CDCl<sub>3</sub>): δ = 1.15 (s, D-1), 1.27 (s, D-11), 2.51 (m<sub>c</sub>, 0.7D, D-4), 3.21 (s, D-5), 4.07 (s, D-2) ppm.

**HRMS** (APCI) for C<sub>13</sub>H<sub>16</sub>D<sub>3</sub>O<sub>3</sub><sup>+</sup> [(M+H)<sup>+</sup>] calculated: 226.1517, found: 226.1508.

**IR** (ATR):  $\tilde{\nu}$  = 2956 (w), 2835 (w), 2133 (w), 1725 (s), 1611 (m), 1511 (s), 1459 (m), 1362 (w), 1241 (s), 1176 (s), 1095 (m), 1031 (s), 829 (s) 725 (w), 633 (w) cm<sup>-1</sup>.

The deuterium incorporation was determined by comparing the integrals of the corresponding <sup>1</sup>H NMR signal H-1 (δ = 1.14–1.20 ppm), H-2 (δ = 4.01–4.10 ppm), H-4 (δ = 2.45–2.57 ppm), H-5 (δ = 3.21 ppm) and H-11 (δ = 1.23–1.28 ppm) with H-10 (δ = 3.78 ppm) [<sup>1</sup>H NMR (700 MHz, CDCl<sub>3</sub>), d<sub>1</sub> = 18 s].

#### 4.6.4 Ethyl 3-phenylbutanoate-2,2-d<sub>2</sub> (S14-d<sub>n</sub>)

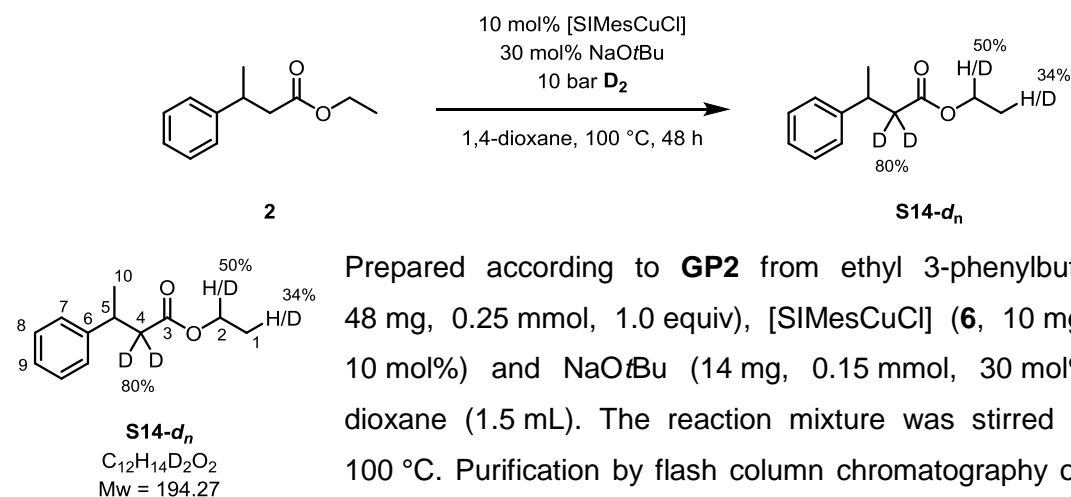

Prepared according to **GP2** from ethyl 3-phenylbutanoate (**3**, 48 mg, 0.25 mmol, 1.0 equiv), [SiMesCuCl] (**6**, 10 mg, 25 μmol, 10 mol%) and NaOtBu (14 mg, 0.15 mmol, 30 mol%) in 1,4-dioxane (1.5 mL). The reaction mixture was stirred for 48 h at 100 °C. Purification by flash column chromatography on silica gel (*n*-pentane/*tert*-butyl methyl ether = 100:1) yielded **S14-d<sub>n</sub>** as a colorless oil (26.8 mg, 0.198 mmol, 79%).

**R<sub>f</sub>** = 0.48 (SiO<sub>2</sub>, cyclohexane/*tert*-butyl methyl ether = 9:1).

**<sup>1</sup>H NMR** (700 MHz, CDCl<sub>3</sub>): δ = 1.12–1.19 (m, 2.0H, H-1), 1.30 (d, <sup>3</sup>J<sub>10,5</sub> = 7.0 Hz, 3H, H-10), 2.48–2.63 (m, 0.4H, H-4), 3.26 (m<sub>c</sub>, 1H, H-5), 4.02–4.10 (m, 1.0H, H-2), 7.17–7.23 (m, 3H, H-7, H-9), 7.27–7.31 (m, 2H, H-8) ppm.

**<sup>13</sup>C NMR** (126 MHz, CDCl<sub>3</sub>): δ = 13.9–14.4 (m, C-1), 21.8–21.9 (m, C-10), 36.4–36.7 (m, C-5), 42.2–43.3 (m, C-4), 59.7–60.4 (m, C-2), 126.5 (C-9), 126.9 (C-7), 128.6 (C-8), 145.8 (C-6), 172.5 (C-3) ppm.

**<sup>2</sup>H NMR** (77 MHz, CDCl<sub>3</sub>): δ = 1.14 (s, D-1), 2.55 (m<sub>c</sub>, D-4), 4.06 (s, D-2) ppm.

**HRMS** (APCI) for C<sub>12</sub>H<sub>14</sub>D<sub>3</sub>O<sub>2</sub><sup>+</sup> [(M+D+H)<sup>+</sup>] calculated: 196.1409, found: 196.1411.

**IR** (ATR):  $\tilde{\nu}$  = 2962 (w), 2927 (w), 1731 (s), 1603 (w), 1494 (w), 1453 (w), 1376 (w), 1255 (m), 1173 (w), 802 (w), 759 (w), 700 (m)  $\text{cm}^{-1}$ .

The deuterium incorporation was determined by comparing the integrals of the corresponding  $^1\text{H}$  NMR signal H-2 ( $\delta$  = 4.02–4.10 ppm), H-4 ( $\delta$  = 2.48–2.63 ppm) and H-1 ( $\delta$  = 1.12–1.19 ppm) with H-7/H-9 ( $\delta$  = 7.17–7.23 ppm) [ $^1\text{H}$  NMR (700 MHz,  $\text{CDCl}_3$ ),  $d_1$  = 23 s].

## 4.7 Competition with alkyne semihydrogenation

### 4.7.1 Ethyl 3-(4-styrylphenyl)butanoate (**S9**)

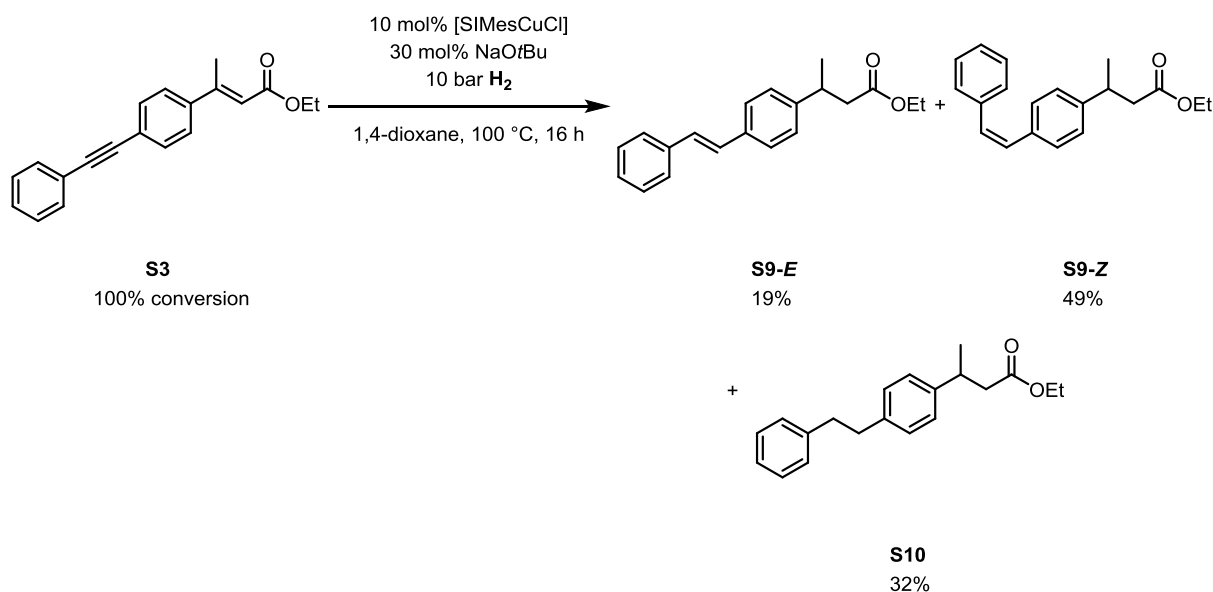

Prepared according to **GP2** from ethyl (*E*)-3-(4-(phenylethynyl)phenyl)but-2-enoate (**S3**, 69 mg, 0.25 mmol, 1.0 equiv), [SiMesCuCl] (**6**, 10.2 mg, 25.0 μmol, 10.0 mol%) and NaOtBu (7.2 mg, 75 μmol, 30 mol%) in 1,4-dioxane (1.5 mL). The reaction mixture was stirred for 16 h at 100 °C. Purification by flash column chromatography on silica gel (*n*-pentane/Et<sub>2</sub>O = 50:1) yielded a mixture of **S9-E**, **S9-Z** and **S10** as a colorless oil (full conversion, 44.6 mg combined yield of **S9-E**, **S9-Z** and **S10**).

$R_f = 0.16$  (SiO<sub>2</sub>, cyclohexane/*tert*-butyl methyl ether = 50:1).

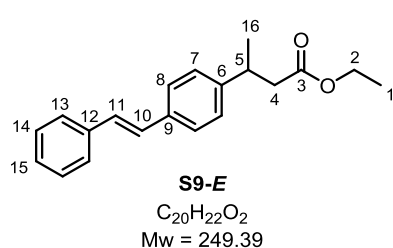

<sup>1</sup>H NMR (500 MHz, CD<sub>2</sub>Cl<sub>2</sub>): δ = 1.19 (t, <sup>3</sup>J<sub>1,2</sub> = 7.1 Hz, 3H, H-1), 1.25–1.32 (m, 3H, H-16), 2.45–2.66 (m, 2H, H-4), 3.19–3.34 (m, 1H, H-5), 4.03–4.13 (m, 2H, H-2), 6.55 (m, 2H, H-10/H-11), 7.05–7.53 (m, 9H, H-7/H-8/H-13/H-14/H-15) ppm.

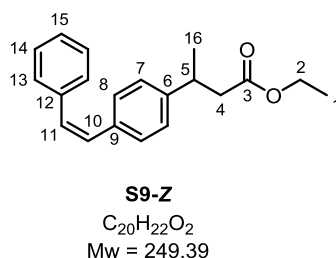

<sup>1</sup>H NMR (500 MHz, CD<sub>2</sub>Cl<sub>2</sub>): δ = 1.18 (t, <sup>3</sup>J<sub>1,2</sub> = 7.1 Hz, 3H, H-1), 1.25–1.32 (m, 3H, H-16), 2.45–2.66 (m, 2H, H-4), 3.19–3.34 (m, 1H, H-5), 4.03–4.13 (m, 2H, H-2), 7.13 (m, 2H, H-10/H-11), 7.05–7.53 (m, 9H, H-7/H-8/H-13/H-14/H-15) ppm.

Due to overlaying signals, <sup>13</sup>C signals have not been

correlated.

Indicative signals for the alkane product **S10** in the <sup>1</sup>H NMR are at δ = 2.89 ppm.

**HRMS** (APCI) for C<sub>20</sub>H<sub>23</sub>O<sub>2</sub><sup>+</sup> [(M+H)<sup>+</sup>] calculated: 295.1693, found: 295.1691.

# <sup>1</sup>H NMR of S9

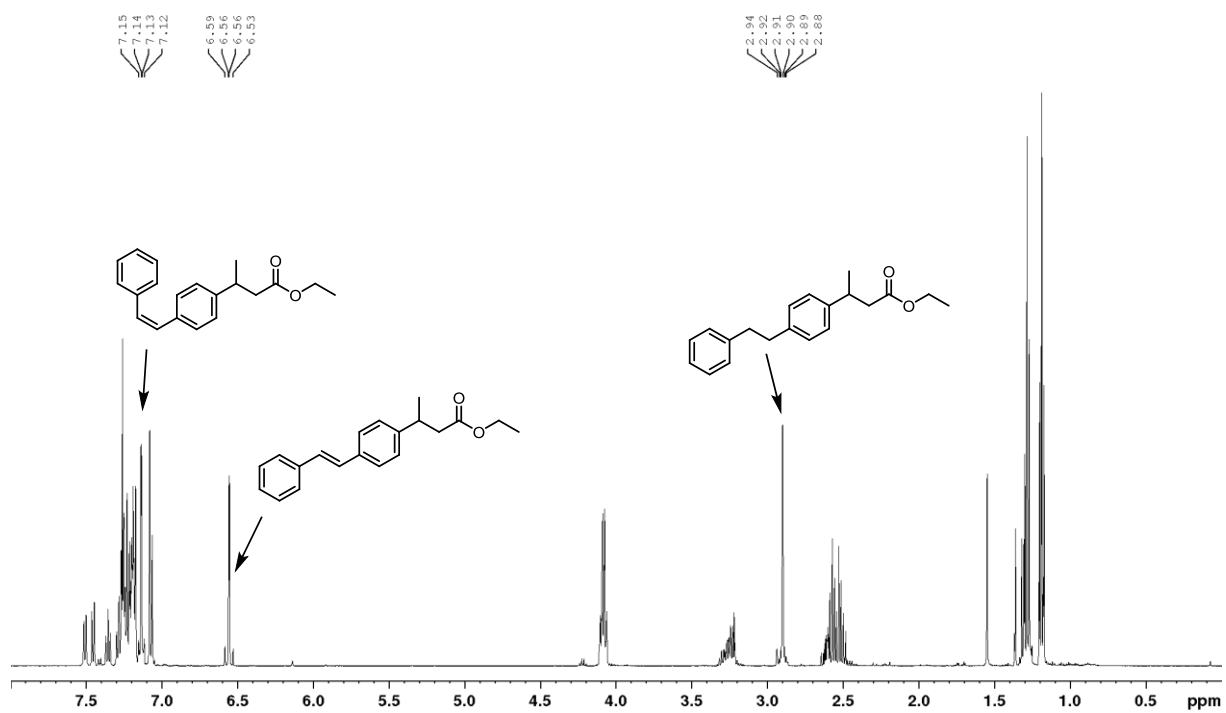

# GC of S9

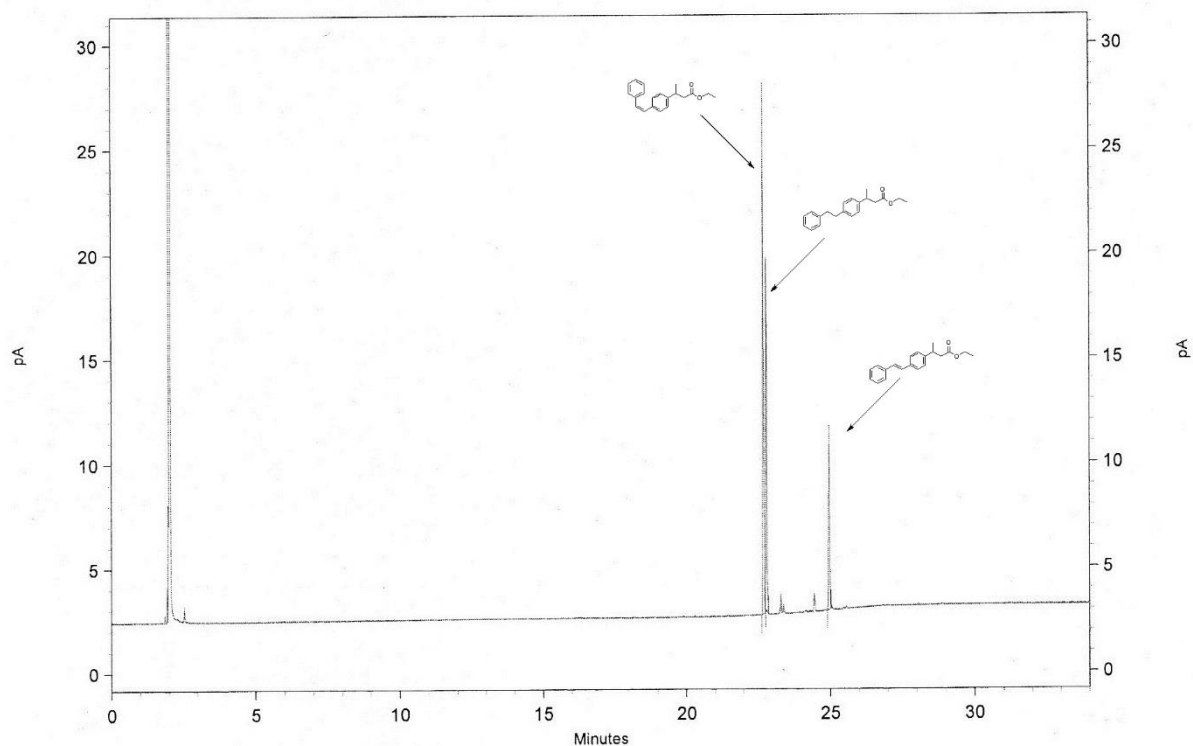

Back  
Signal  
Results

| Peak # | Retention Time | Height | Height Percent | Area   | Area Percent |
|--------|----------------|--------|----------------|--------|--------------|
| 1      | 22,6897        | 195053 | 49,7130        | 429181 | 49,0139      |
| 2      | 22,8000        | 129937 | 33,1170        | 278477 | 31,8030      |
| 3      | 24,9660        | 67368  | 17,1700        | 167974 | 19,1832      |
| Totals |                | 392358 | 100,0000       | 875632 | 100,0000     |



# GC/MS of S9-Z



# GC/MS of S10



# GC/MS of S9-E

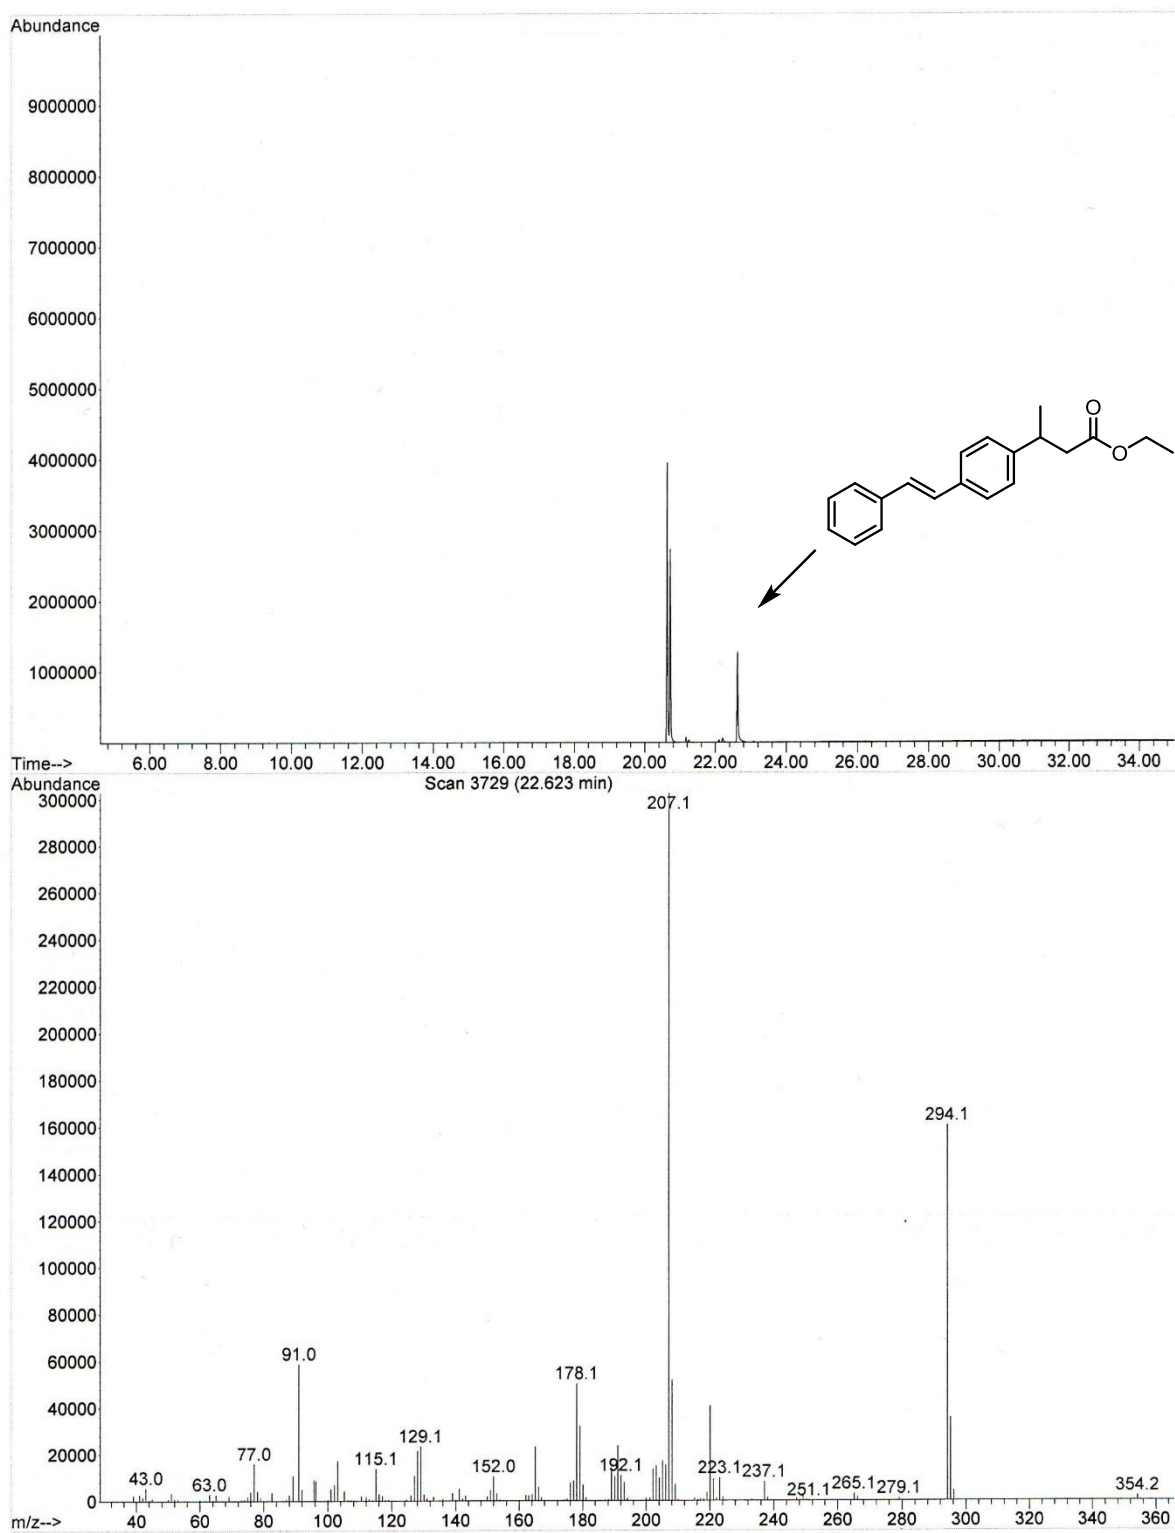

#### 4.8 Circumstantial evidence for possible recycling and re-isolation of the catalyst [SiMesCuCl] (**6**)

To address the issue of the homogeneous or heterogeneous nature of the catalyst, attempts have been carried out to re-isolate the catalyst (**6**), by quenching the standard conjugate reduction reaction with HCl in Et<sub>2</sub>O. These experiments have failed to deliver the desired complex **6**. However, in various catalytic conjugate reductions of enoates employing compound **6** as catalyst, we have identified the corresponding mass (Mw = 404) by GC/MS analysis. (see below for a representative GC/MS trace).

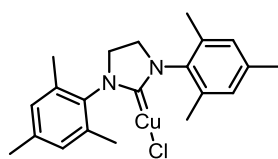

[SiMesCuCl] (**6**)  
C<sub>21</sub>H<sub>26</sub>ClCuN<sub>2</sub>  
Mw: 404,11

From the reaction of **1** with anilin as additive (see section 4.5.1.3): Note the peak at 15.56 min.

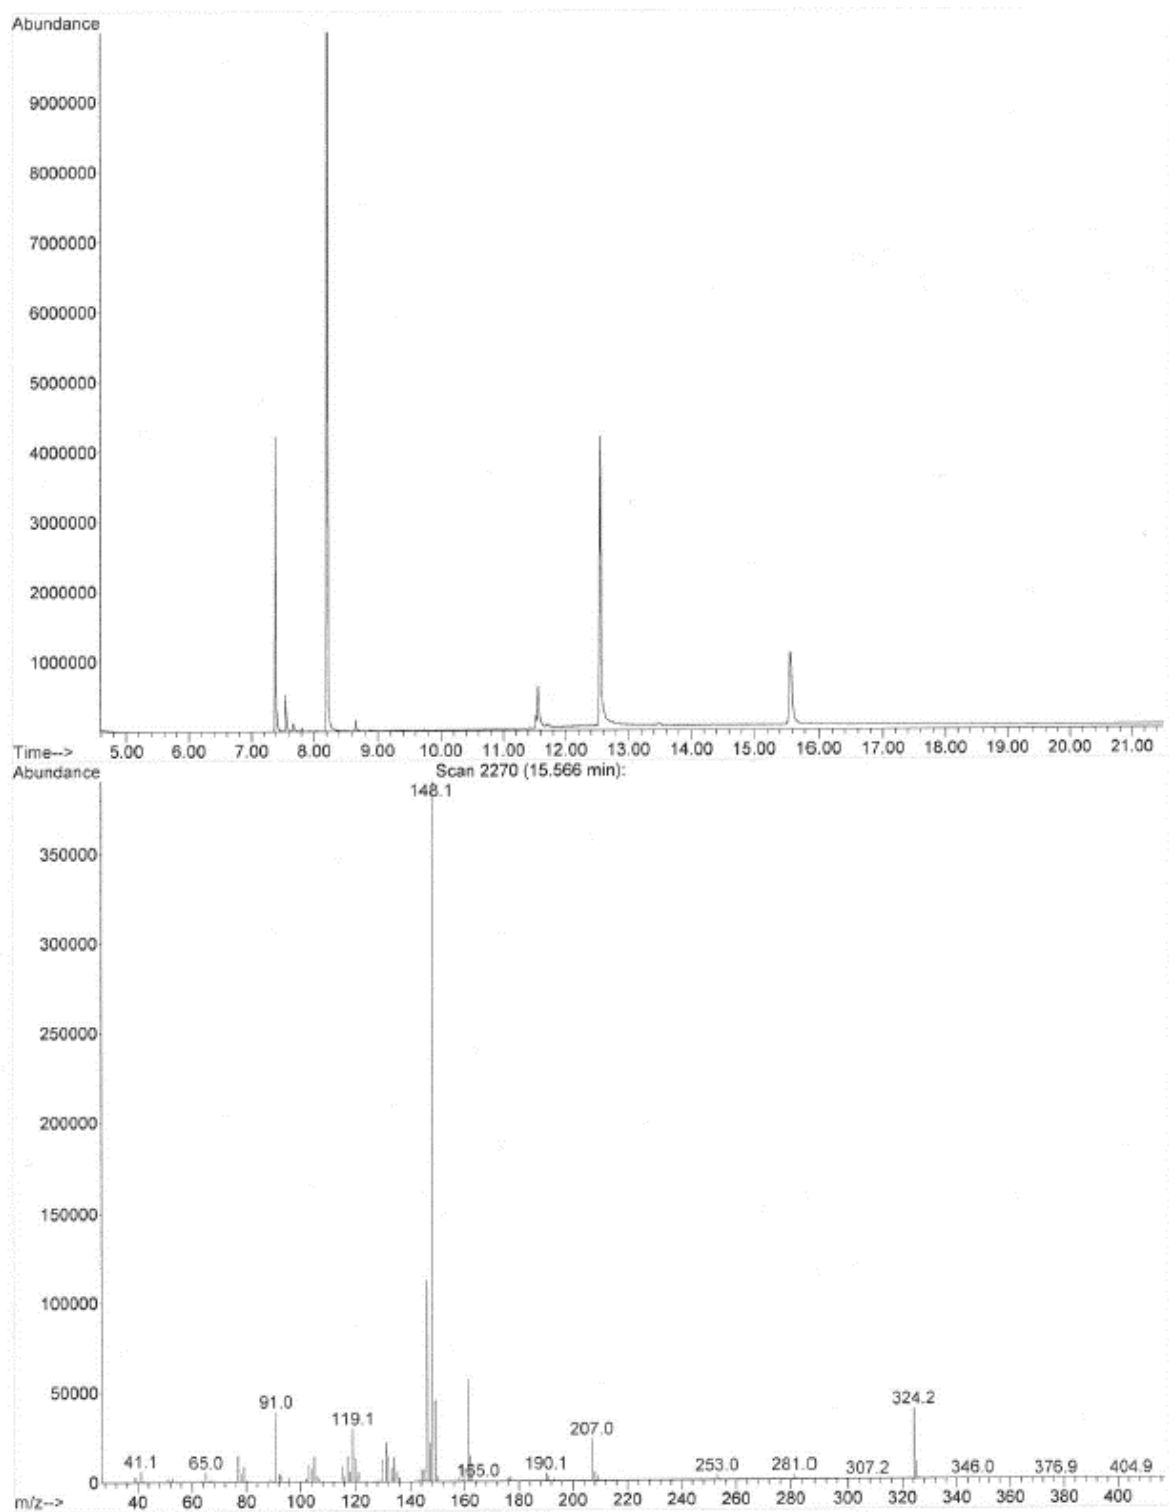

## 5 Asymmetric conjugate reduction of $\alpha,\beta$ -unsaturated esters

### 5.1 General procedure 3 – asymmetric conjugate reduction (GP3)

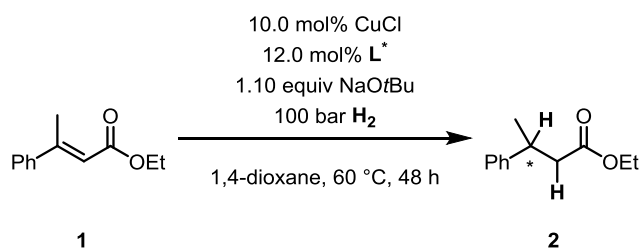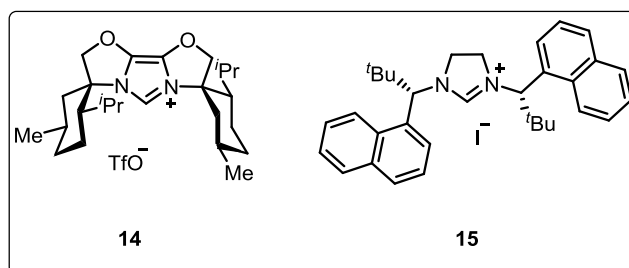

In a glass vial equipped with a septum, CuCl (99.99%, 2.0 mg, 20  $\mu$ mol, 10 mol%) and L\* (24  $\mu$ mol, 12 mol%) are placed and the vial is transferred into a glovebox. Dried NaOtBu (21.4 mg, 0.222 mmol, 1.10 equiv) is added and the solids are dissolved in 1,4-dioxane (1 mL). The mixture is stirred for 10 min at 40 °C. The degassed  $\alpha,\beta$ -unsaturated ester **1** (38.4 mg, 0.202 mmol, 1.00 equiv) is dissolved in 1,4-dioxane (0.2 mL) and transferred to the reaction vial. The vial is placed in an autoclave and the septum is pierced with a needle under N<sub>2</sub>-counterflow. The autoclave is purged with H<sub>2</sub> (3 x 10 bar). The reaction mixture is stirred for 48 h at 60 °C under H<sub>2</sub>-atmosphere (100 bar). The crude reaction mixture is filtered over a small plug silica (eluent: CH<sub>2</sub>Cl<sub>2</sub>, 0.5 x 3 cm, 10 mL) and all volatiles are removed under reduced pressure. The crude product **2** is purified by flash column chromatography on silica gel.

**Table S7:** Asymmetric conjugate reduction – Ligand screening.<sup>a</sup>

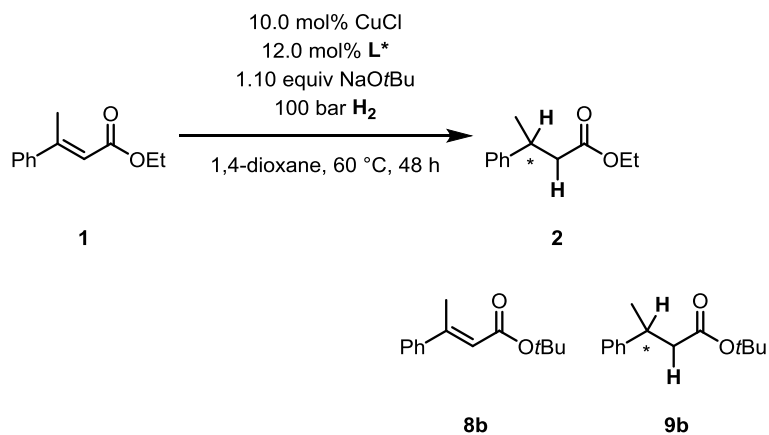

| Entry | Ligand L* | Conv [%] <sup>b</sup> | comment                                        | e.r. of 2 <sup>c</sup> |
|-------|-----------|-----------------------|------------------------------------------------|------------------------|
| 1     |           | 71%                   | 67% <b>2</b><br>23% <b>9b</b><br>10% <b>8b</b> | 82:18                  |
| 2     |           | 100%                  | 81% <b>2</b><br>19% <b>9b</b>                  | 78:22                  |
| 3     |           | 89%                   | 69% <b>2</b><br>27% <b>9b</b><br>4% <b>8b</b>  | 63:37                  |
| 4     |           | 100%                  | 74% <b>2</b><br>26% <b>9b</b>                  | 53:47                  |

<sup>a</sup> All reactions with 2.0 μmol [Cu] in 1.2 mL solvent. <sup>b</sup> Determined by GC analysis. <sup>c</sup> Determined by HPLC, OD-H, *n*-heptane/*i*PrOH = 98:2, 0.5 mL/min, 20 °C, 30 bar.

## HPLC data for racemic mixture

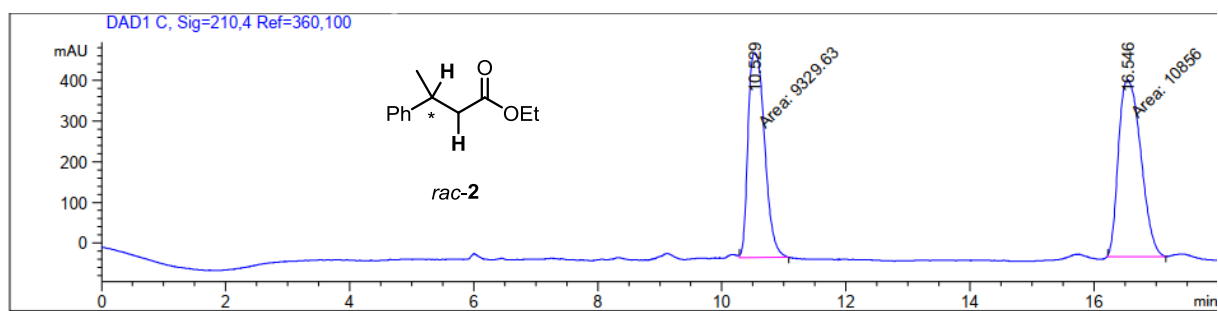

Signal 3: DAD1 C, Sig=210,4 Ref=360,100

| Peak # | RetTime [min] | Type | Width [min] | Area [mAU*s] | Height [mAU] | Area %  |
|--------|---------------|------|-------------|--------------|--------------|---------|
| 1      | 10.529        | MM   | 0.3088      | 9329.62891   | 503.57388    | 46.2191 |
| 2      | 16.546        | MM   | 0.4167      | 1.08560e4    | 434.18994    | 53.7809 |

Totals : 2.01857e4 937.76382

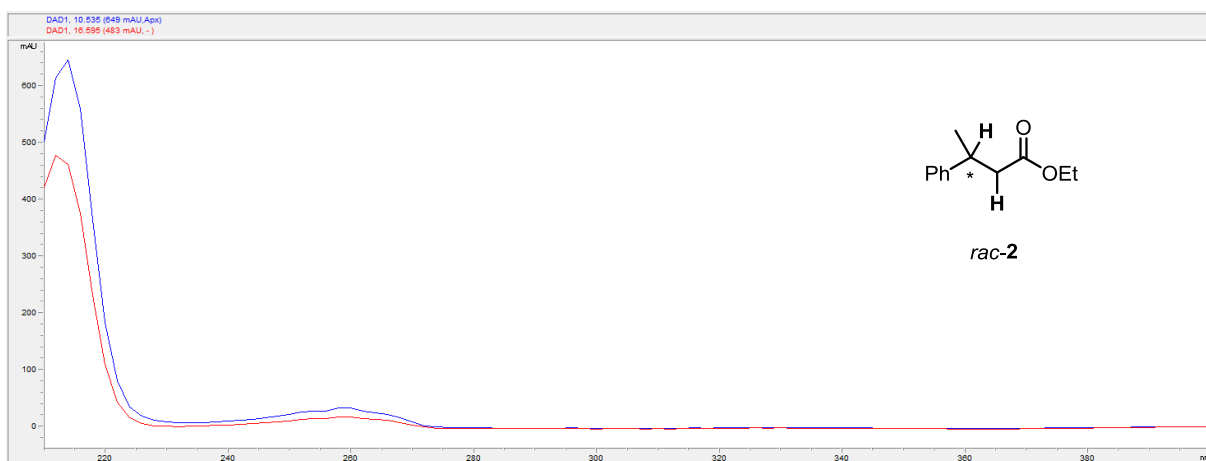



# HPLC data for 2 with 14, table S7, entry 1

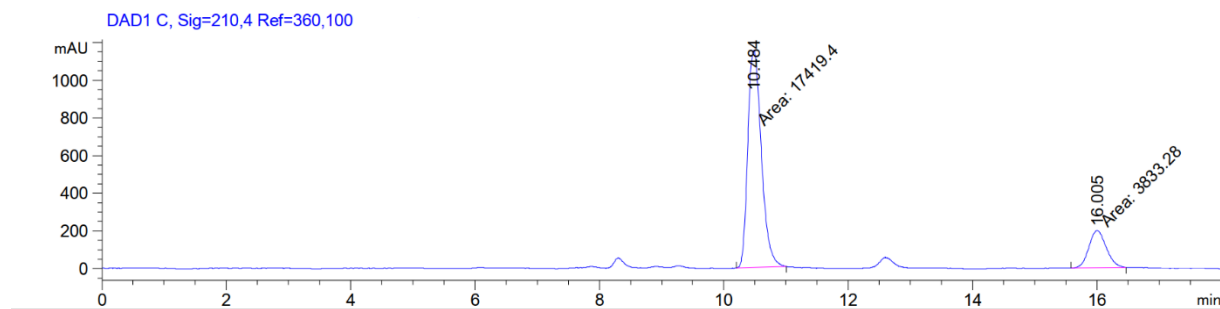

Signal 3: DAD1 C, Sig=210,4 Ref=360,100

| Peak # | RetTime [min] | Type | Width [min] | Area [mAU*s] | Height [mAU] | Area %  |
|--------|---------------|------|-------------|--------------|--------------|---------|
| 1      | 10.484        | MM   | 0.2518      | 1.74194e4    | 1152.90198   | 81.9633 |
| 2      | 16.005        | MM   | 0.3233      | 3833.27954   | 197.61829    | 18.0367 |

Totals : 2.12527e4 1350.52026

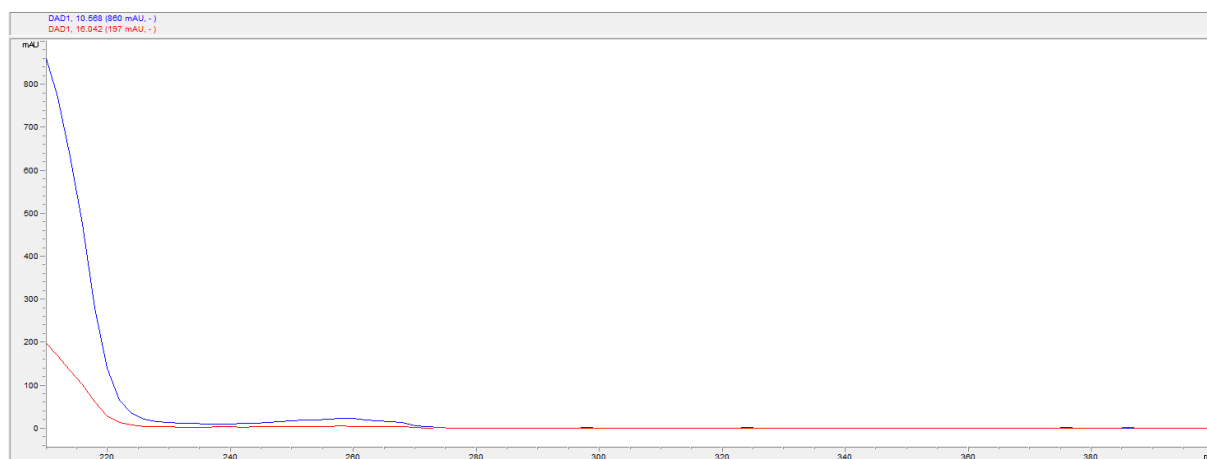

HPLC data for 2 with 15, table S7, entry 2:

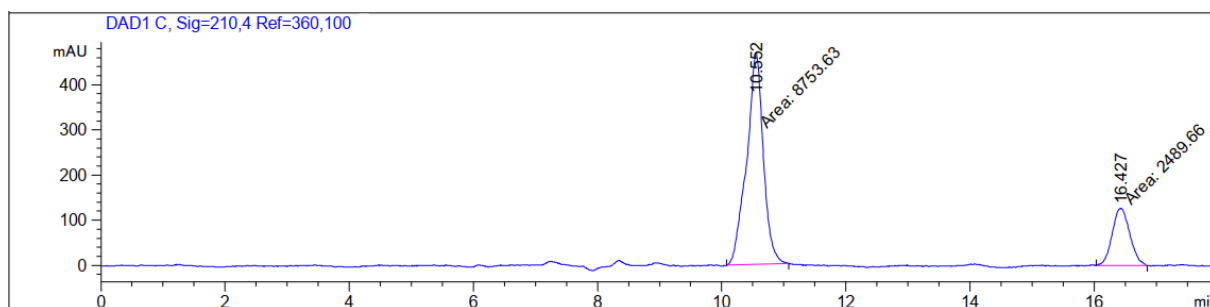

Signal 3: DAD1 C, Sig=210,4 Ref=360,100

| Peak # | RetTime [min] | Type | Width [min] | Area [mAU*s] | Height [mAU] | Area %  |
|--------|---------------|------|-------------|--------------|--------------|---------|
| 1      | 10.552        | MM   | 0.3109      | 8753.63086   | 469.27487    | 77.8565 |
| 2      | 16.427        | MM   | 0.3289      | 2489.65576   | 126.16525    | 22.1435 |

Totals : 1.12433e4 595.44012

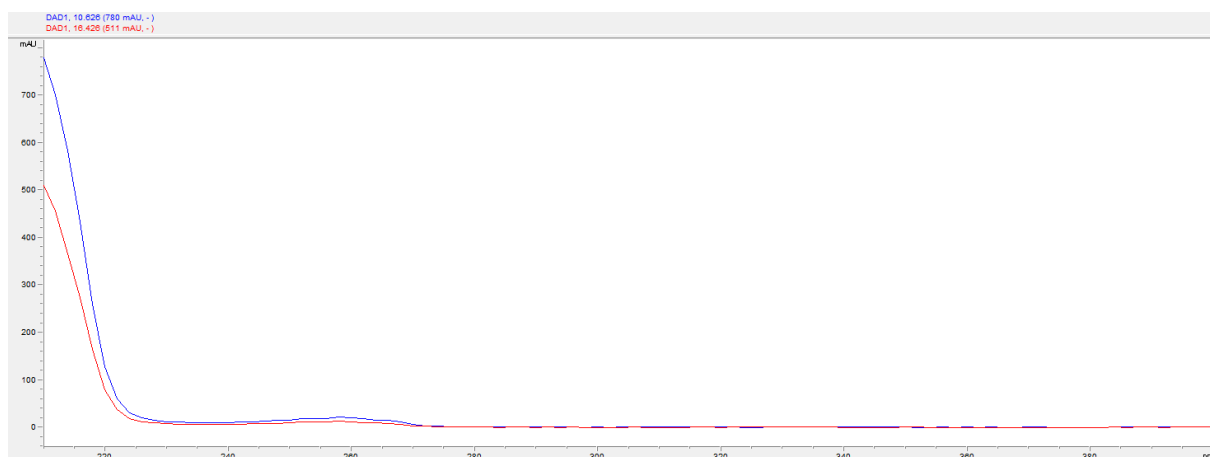

### HPLC data for 2 with S15, table S7, entry 3:

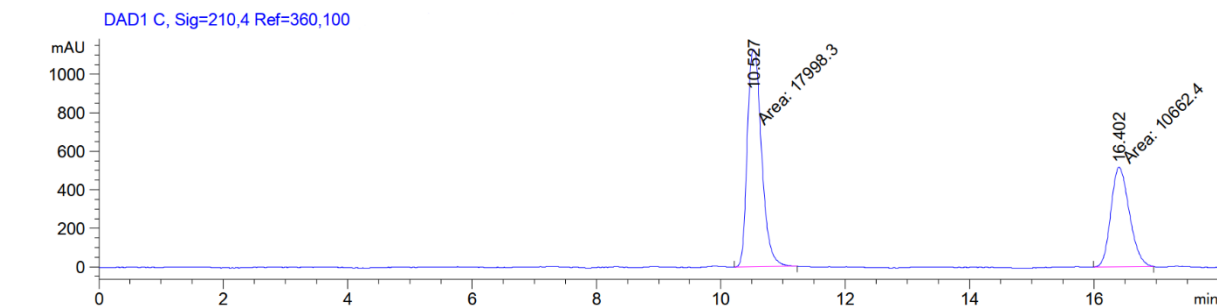

Signal 3: DAD1 C, Sig=210,4 Ref=360,100

| Peak # | RetTime [min] | Type | Width [min] | Area [mAU*s] | Height [mAU] | Area %  |
|--------|---------------|------|-------------|--------------|--------------|---------|
| 1      | 10.527        | MM   | 0.2658      | 1.79983e4    | 1128.76367   | 62.7978 |
| 2      | 16.402        | MM   | 0.3433      | 1.06624e4    | 517.70624    | 37.2022 |

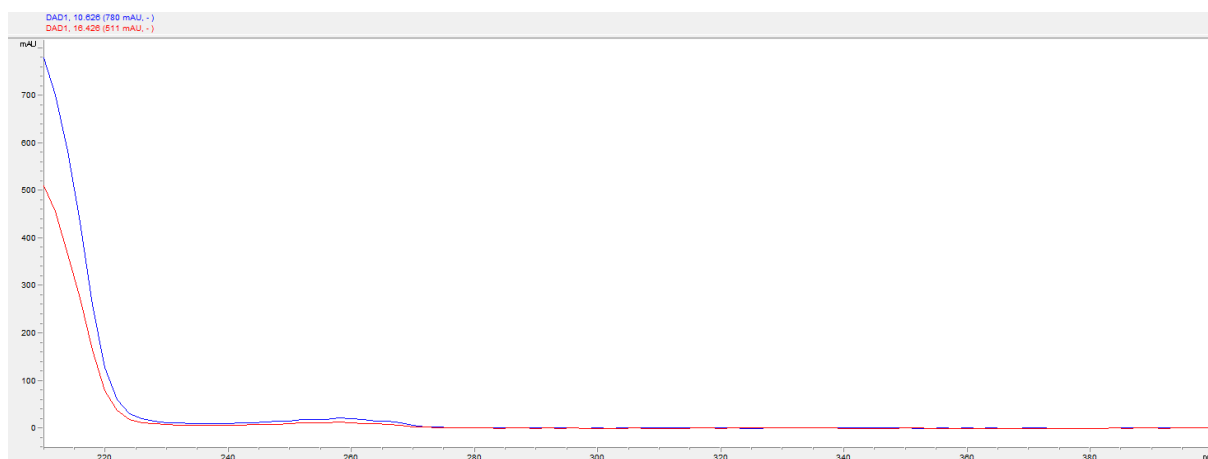

**HPLC data for 2 with S16, table S7, entry 4:**

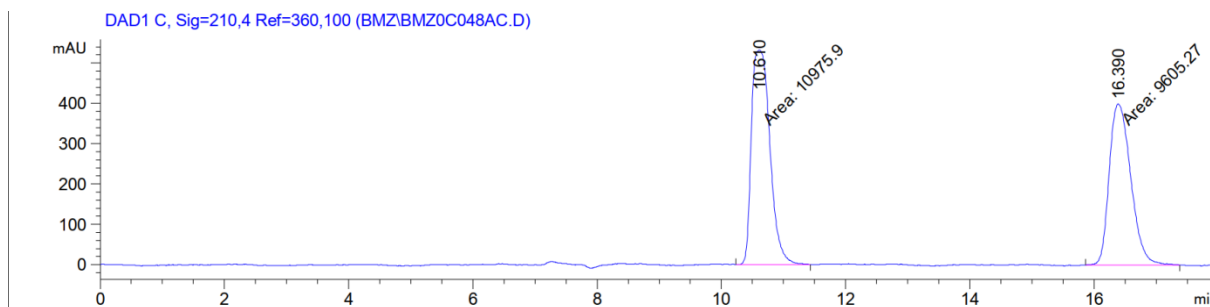

Signal 3: DAD1 C, Sig=210,4 Ref=360,100

| Peak # | RetTime [min] | Type | Width [min] | Area [mAU*s] | Height [mAU] | Area %  |
|--------|---------------|------|-------------|--------------|--------------|---------|
| 1      | 10.610        | MM   | 0.3442      | 1.09759e4    | 531.48633    | 53.3297 |
| 2      | 16.390        | MM   | 0.4014      | 9605.26758   | 398.84921    | 46.6703 |

Totals : 2.05811e4 930.33554

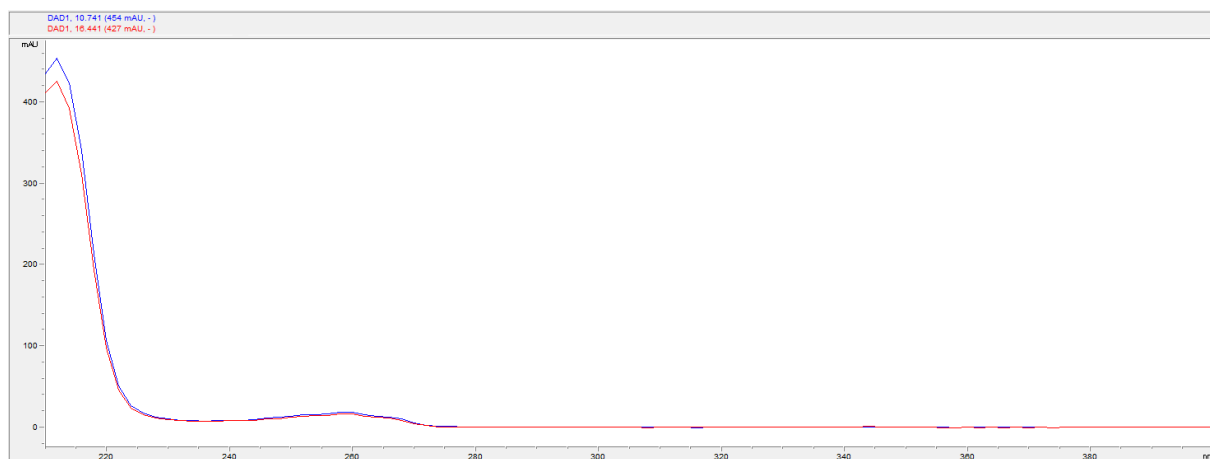

## 6 References

- [1] a) G. R. Fulmer, A. J. M. Miller, N. H. Sherden, H. E. Gottlieb, A. Nudelman, B. M. Stoltz, J. E. Bercaw, K. I. Goldberg, *Organometallics* **2010**, *29*, 2176; b) H. E. Gottlieb, V. Kotlyar, A. Nudelman, *J. Org. Chem.* **1997**, *62*, 7512.
- [2] M. Hans, J. Lorkowski, A. Demonceau, L. Delaude, *Beilstein J. Org. Chem.* **2015**, *11*, 2318.
- [3] T. N. T. Nguyen, N. O. Thiel, F. Pape, J. F. Teichert, *Org. Lett.* **2016**, *18*, 2455.
- [4] Y.-F. Zhu, X.-L. Geng, Y.-H. Guan, W. Teng, X. Fan, *Synlett* **2017**, 28, 1821.
- [5] S. S. M. Spoehrle, T. H. West, J. E. Taylor, A. M. Z. Slawin, A. D. Smith, *J. Am. Chem. Soc.* **2017**, *139*, 11895.
- [6] M. Shevlin, M. R. Friedfeld, H. Sheng, N. A. Pierson, J. M. Hoyt, L.-C. Campeau, P. J. Chirik, *J. Am. Chem. Soc.* **2016**, *138*, 3562.
- [7] C. Ma, W. M. Kwok, W. S. Chan, Y. Du, J. T. W. Kan, P. H. Toy, D. L. Phillips, *J. Am. Chem. Soc.* **2006**, *128*, 2558.
- [8] S. Miaskiewicz, J. H. Reed, P. A. Donets, C. C. Oliveira, N. Cramer, *Angew. Chem. Int. Ed.* **2018**, *57*, 4039.
- [9] J. B. Metternich, R. Gilmour, *J. Am. Chem. Soc.* **2015**, *137*, 11254.
- [10] M. Bernasconi, V. Ramella, P. Tosatti, A. Pfaltz, *Chem. Eur. J.* **2014**, *20*, 2440.
- [11] A. Guzman-Martinez, A. H. Hoveyda, *J. Am. Chem. Soc.* **2010**, *132*, 10634.
- [12] L. Botella, C. Nájera, *J. Org. Chem.* **2005**, *70*, 4360.
- [13] B. Neises, W. Steglich, *Angew. Chem. Int. Ed.* **1978**, *17*, 522.
- [14] B. F. Strick, D. A. Mundal, R. J. Thomson, *J. Am. Chem. Soc.* **2011**, *133*, 14252.
- [15] M. Watanabe, S. Hisamatsu, H. Hotokezaka, S. Furukawa, *Chem. Pharm. Bull.* **1986**, *34*, 2810.
- [16] Y. Ma, D. B. Collum, *J. Am. Chem. Soc.* **2007**, *129*, 14818.
- [17] W. Ye, X. Liao, *Synthesis* **1985**, 986.
- [18] J. Chen, W. Long, S. Fang, Y. Yang, X. Wan, *Chem. Commun.* **2017**, 53, 13256.
- [19] M. Hans, L. Delaude, *Org. Synth.* **2010**, *87*, 77.
- [20] A. J. Arduengo, R. Krafczyk, R. Schmutzler, H. A. Craig, J. R. Goerlich, W. J. Marshall, M. Unverzagt, *Tetrahedron* **1999**, *55*, 14523.
- [21] O. Santoro, A. Collado, A. M. Z. Slawin, S. P. Nolan, C. S. J. Cazin, *Chem. Commun.* **2013**, 49, 10483.
- [22] S. Lin, X. Lu, *Tetrahedron Lett.* **2006**, *47*, 7167.
- [23] E. Korytiaková, N. O. Thiel, F. Pape, J. F. Teichert, *Chem. Commun.* **2017**, 53, 732.

- [24] X. Lu, S. Lin, *J. Org. Chem.* **2005**, *70*, 9651.
- [25] C. Metallinos, J. Zaifman, L. van Belle, L. Dodge, M. Pilkington, *Organometallics* **2009**, *28*, 4534.
- [26] R. E. Deasy, M. Brossat, T. S. Moody, A. R. Maguire, *Tetrahedron: Asymmetry* **2011**, *22*, 47.
- [27] S. Guo, J. S. Zhou, *Org. Lett.* **2016**, *18*, 5344.
- [28] A. M. Linsenmeier, W. M. Braje, *Tetrahedron* **2015**, *71*, 6913.
- [29] P. Ghorai, A. Kraus, M. Keller, C. Götte, P. Igel, E. Schneider, D. Schnell, G. Bernhardt, S. Dove, M. Zabel, S. Elz, R. Seifert, A. Buschauer, *J. Med. Chem.* **2008**, *51*, 7193.
- [30] B. H. Lipshutz, J. M. Servesko, B. R. Taft, *J. Am. Chem. Soc.* **2004**, *126*, 8352.
- [31] Z.-L. Shen, H.-L. Cheong, T.-P. Loh, *Tetrahedron Lett.* **2009**, *50*, 1051.
- [32] a) K. D. Collins, F. Glorius, *Nat. Chem.* **2013**, *5*, 597; b) T. Gensch, M. Teders, F. Glorius, *J. Org. Chem.* **2017**, *82*, 9154; c) K. D. Collins, F. Glorius, *Acc. Chem. Res.* **2015**, *48*, 619.

## 7 Spectra

***N*<sup>1</sup>,*N*<sup>2</sup>-dimesitylethane-1,2-diaminium chloride (S7)**

<sup>1</sup>H NMR

6.91

3.42  
3.40

2.36  
2.35  
2.21

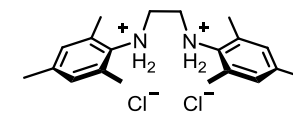

S7

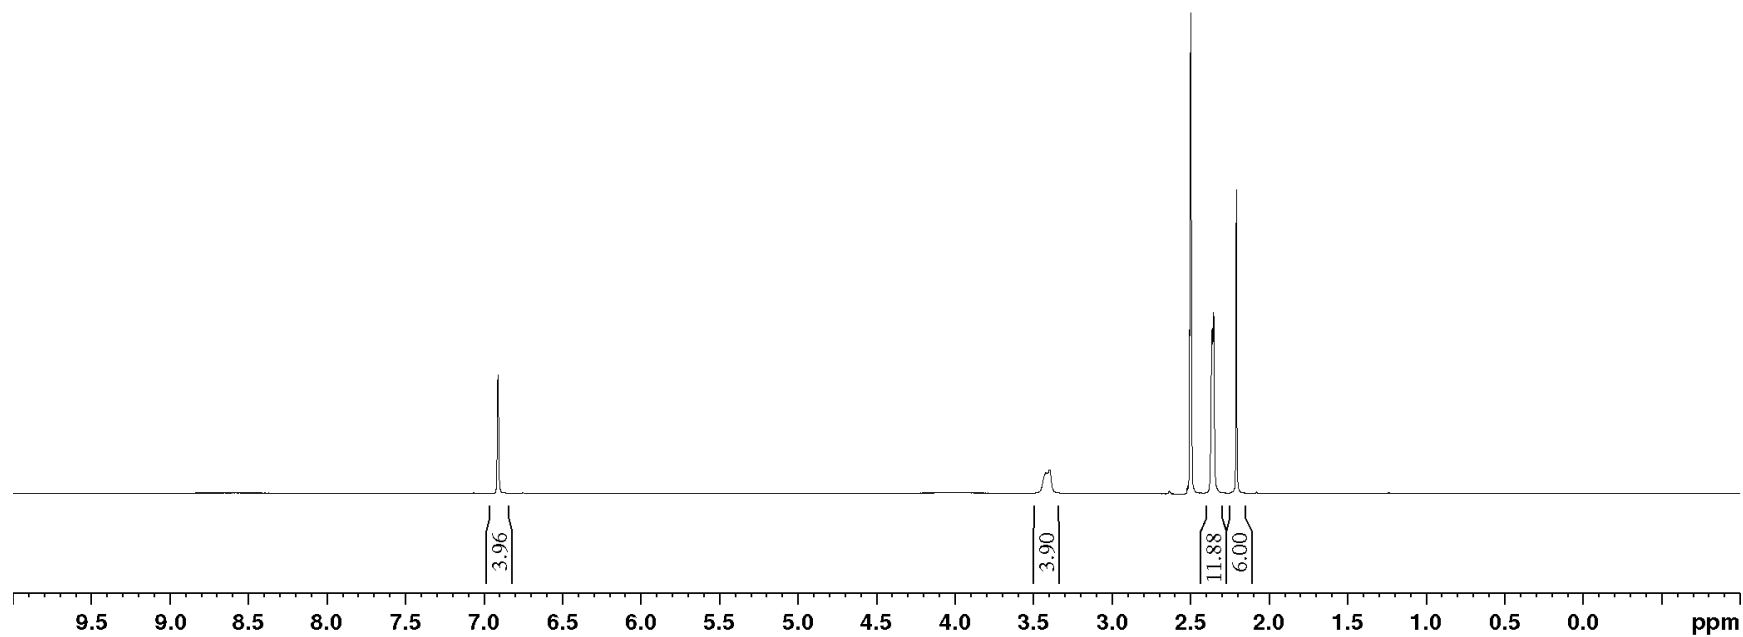



<sup>13</sup>C NMR

135.9  
130.9  
129.9

46.9

20.2  
18.0

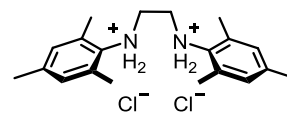

S7

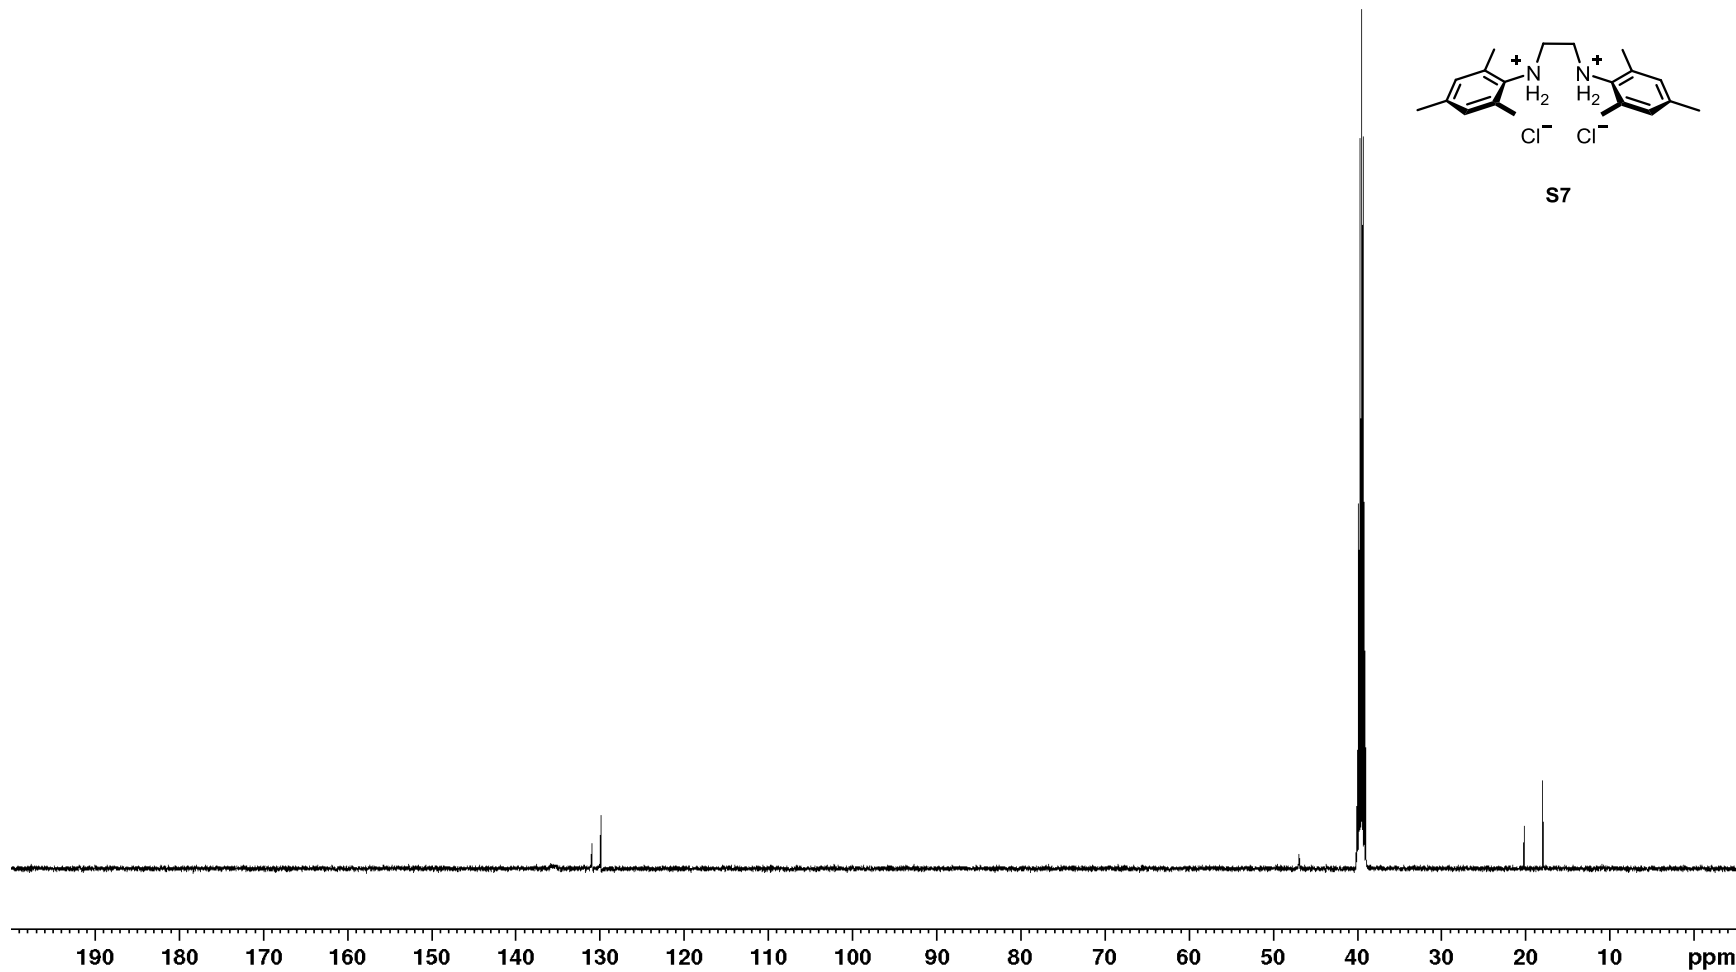

<sup>1</sup>H-<sup>1</sup>H COSY

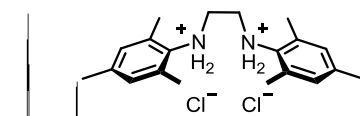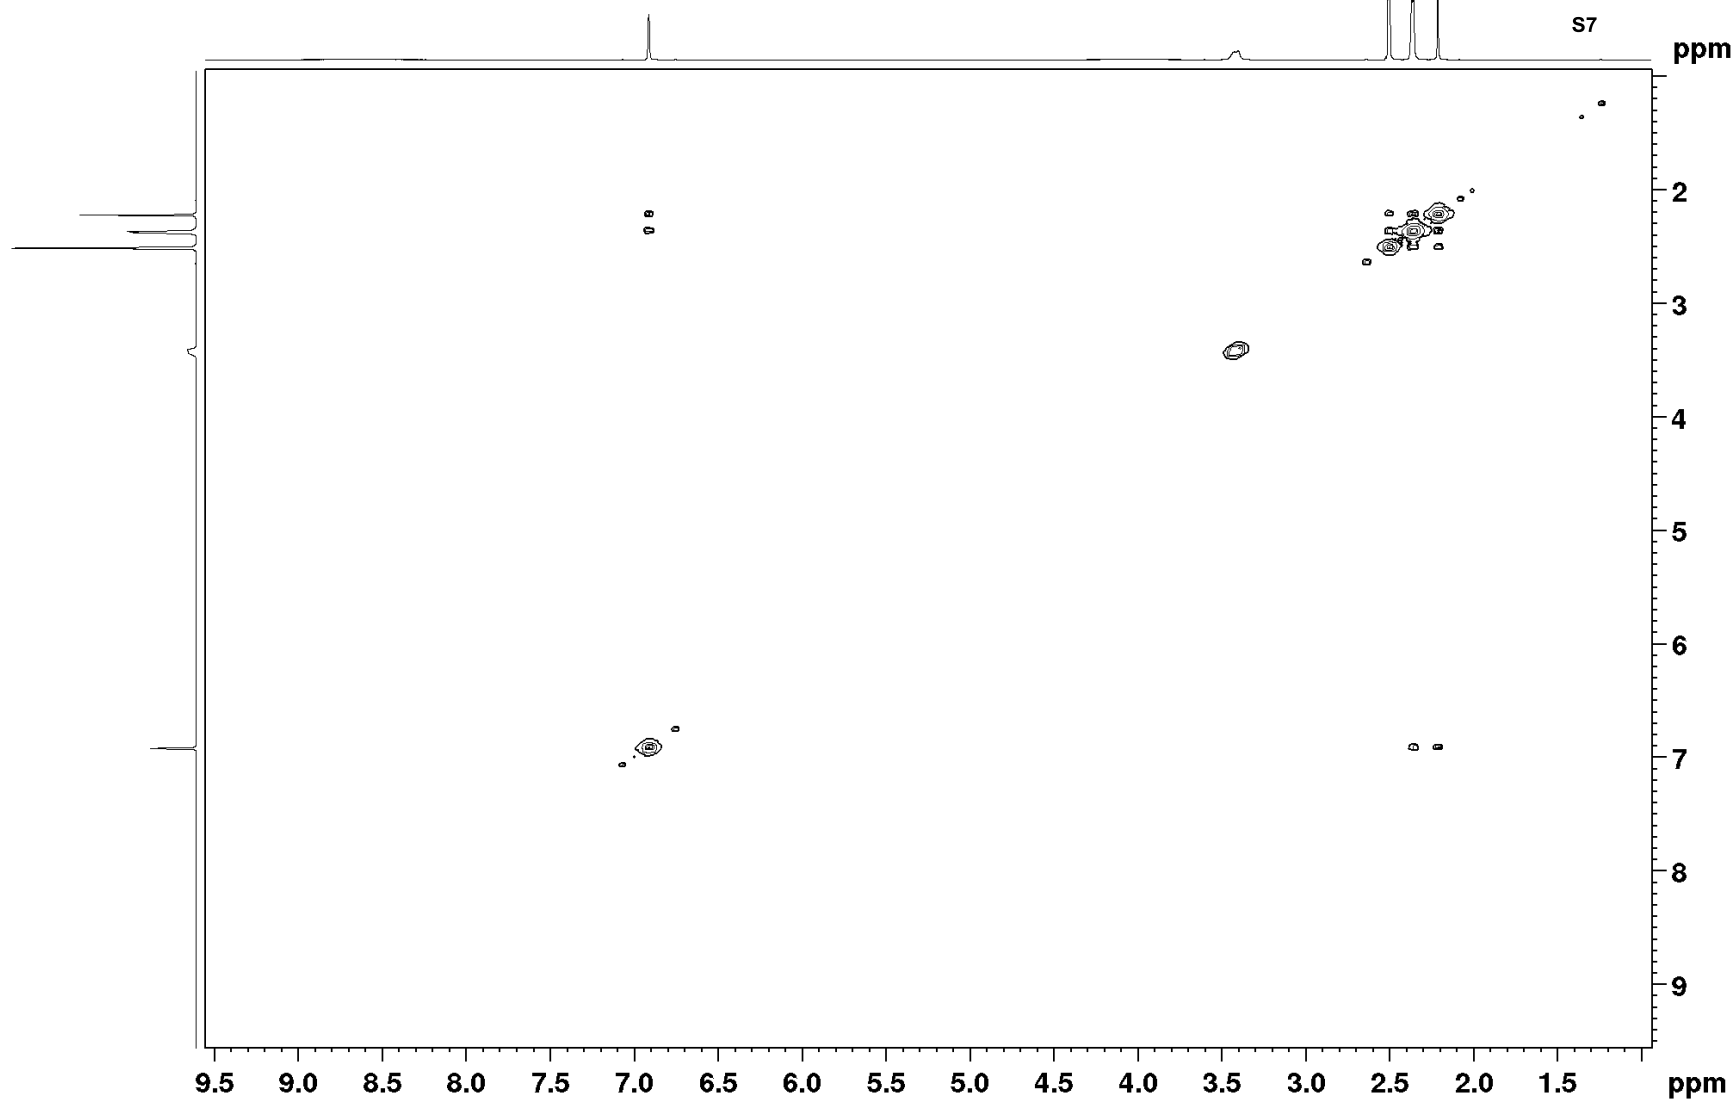

$^1\text{H}$ - $^{13}\text{C}$  HSQC

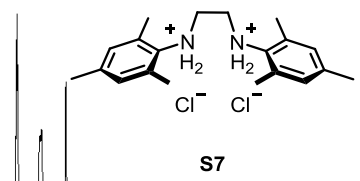

S7

ppm

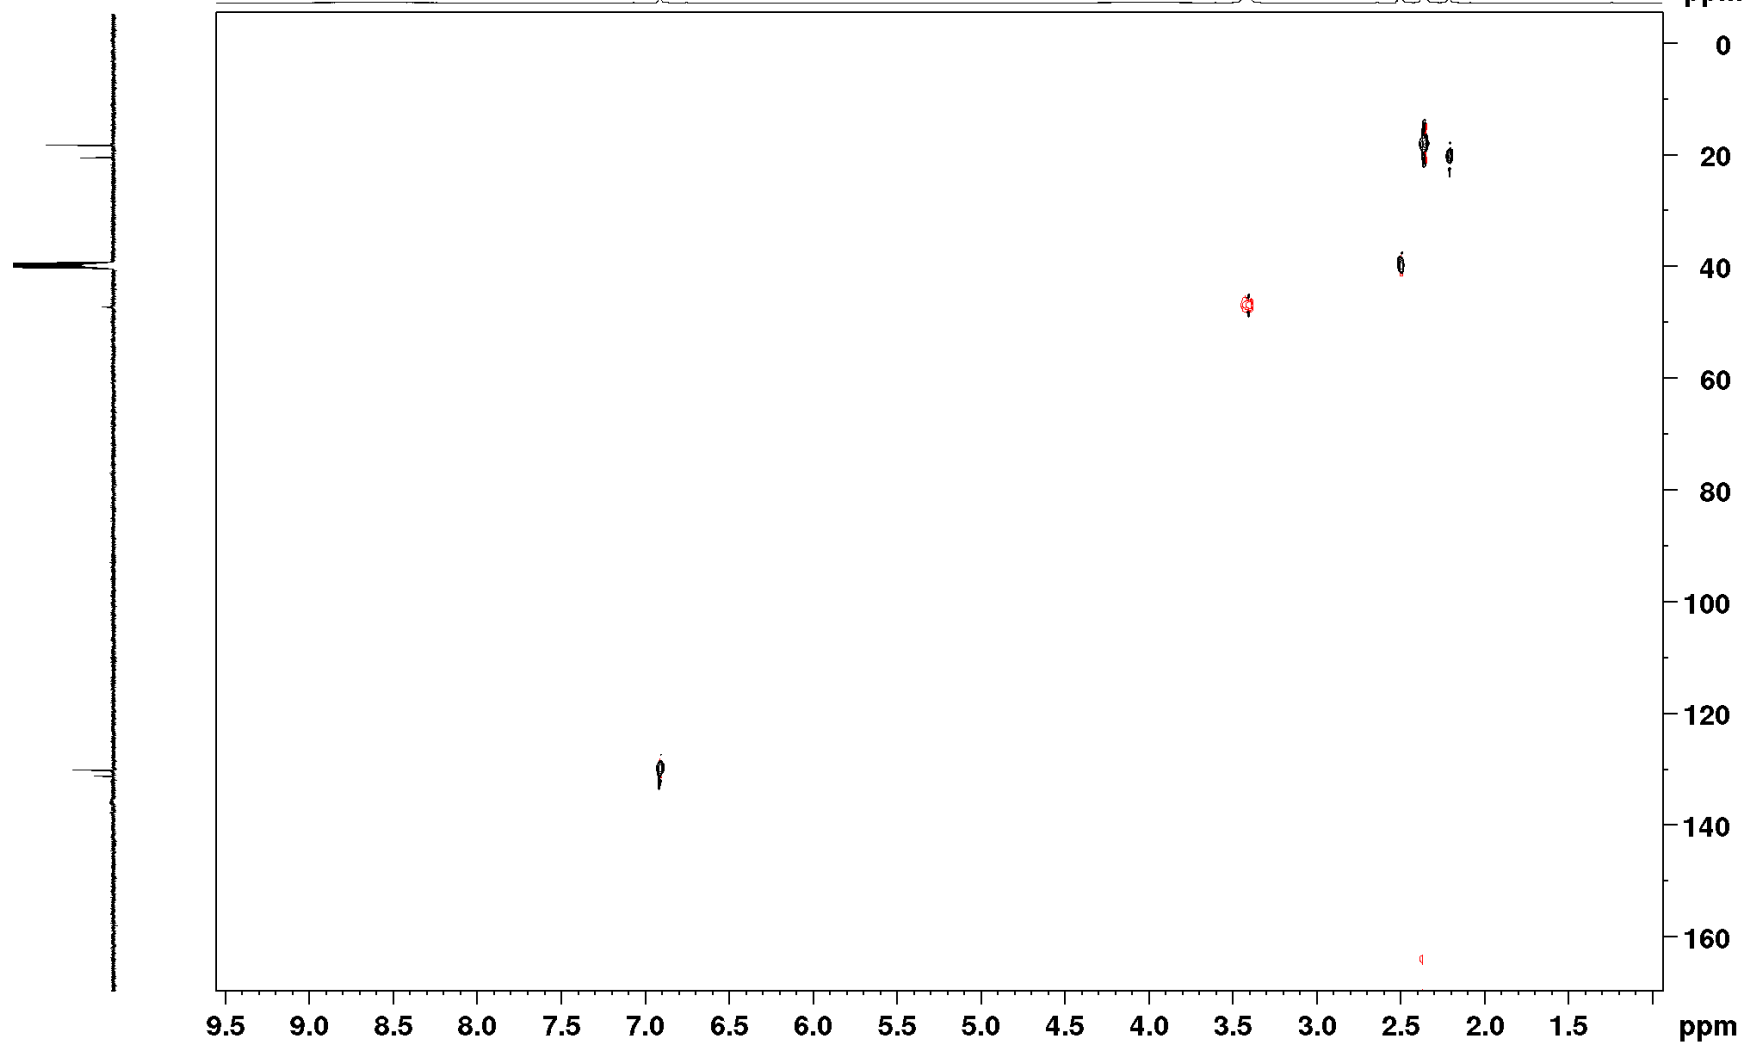

S103

$^1\text{H}$ - $^{13}\text{C}$  HMBC

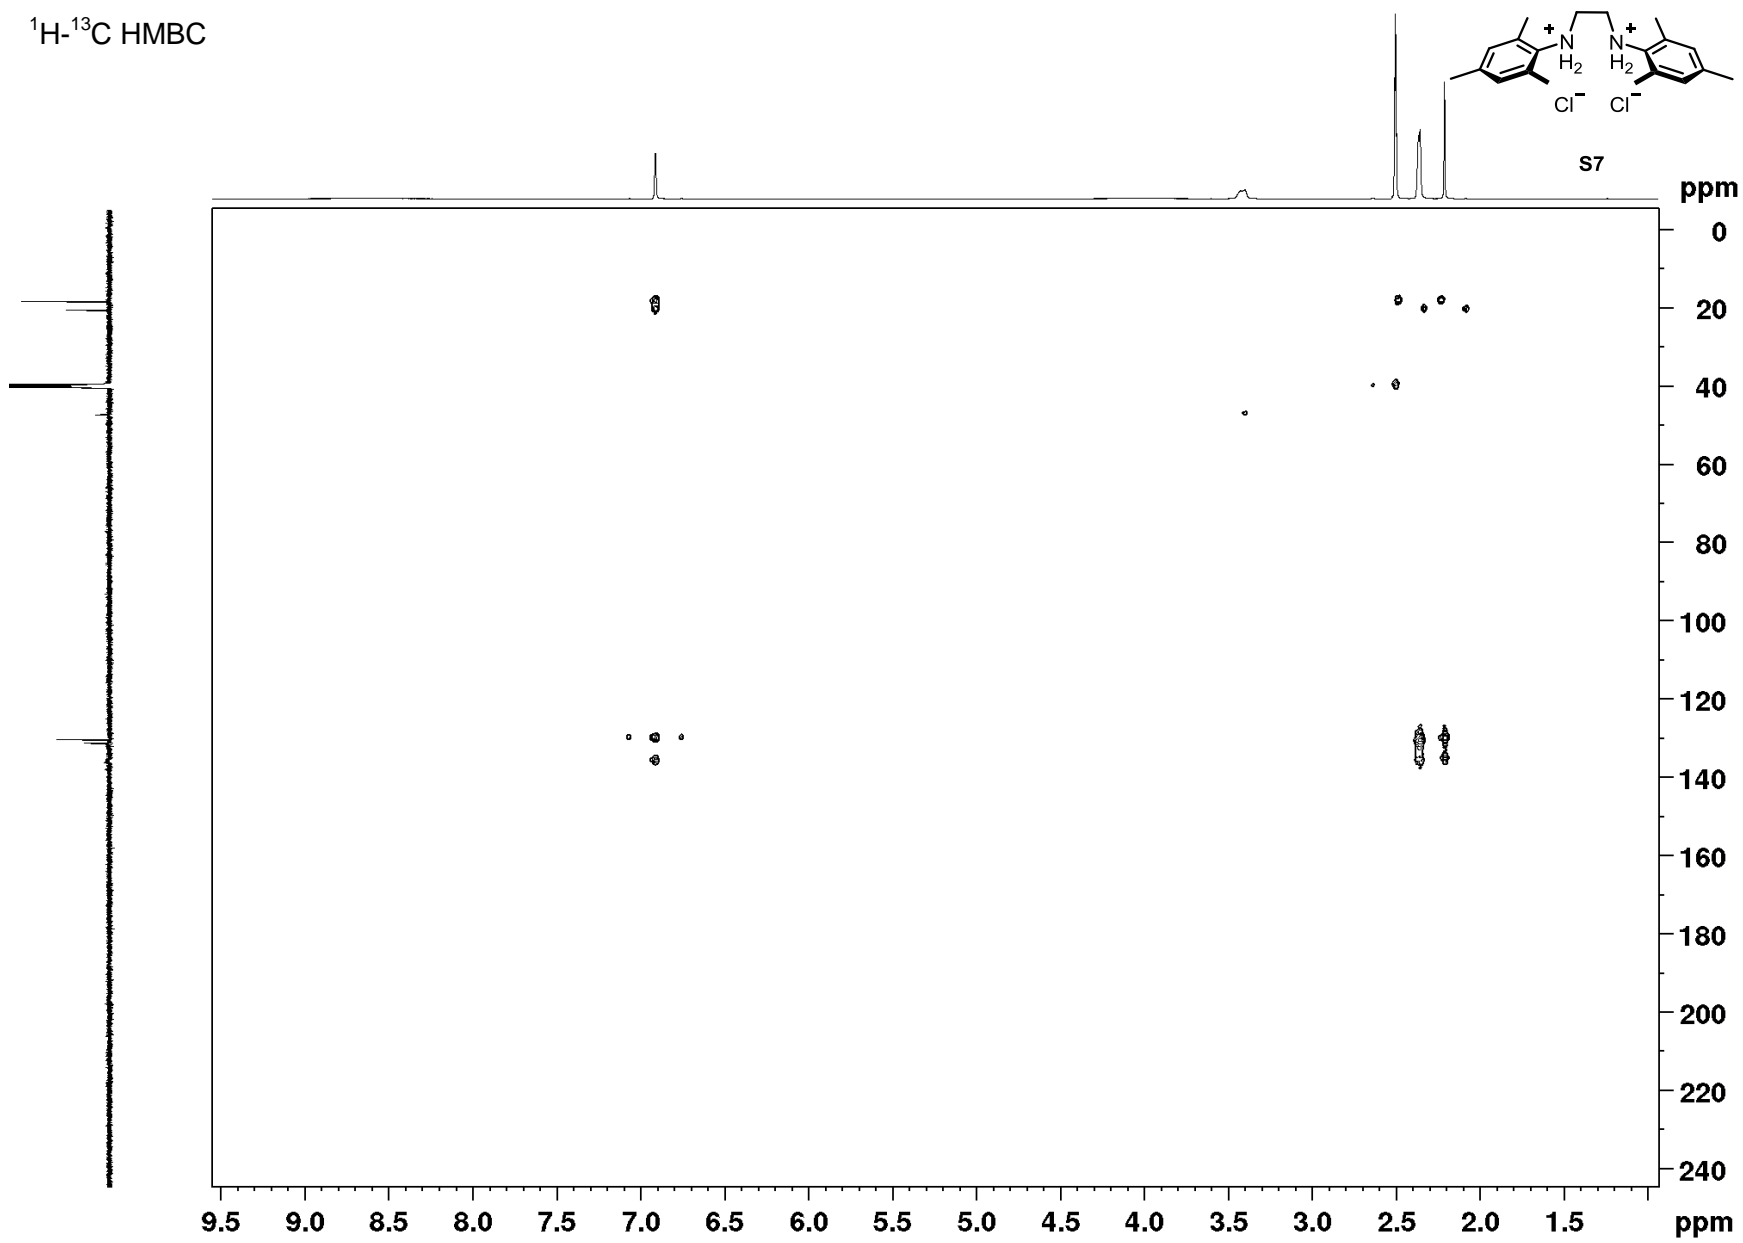

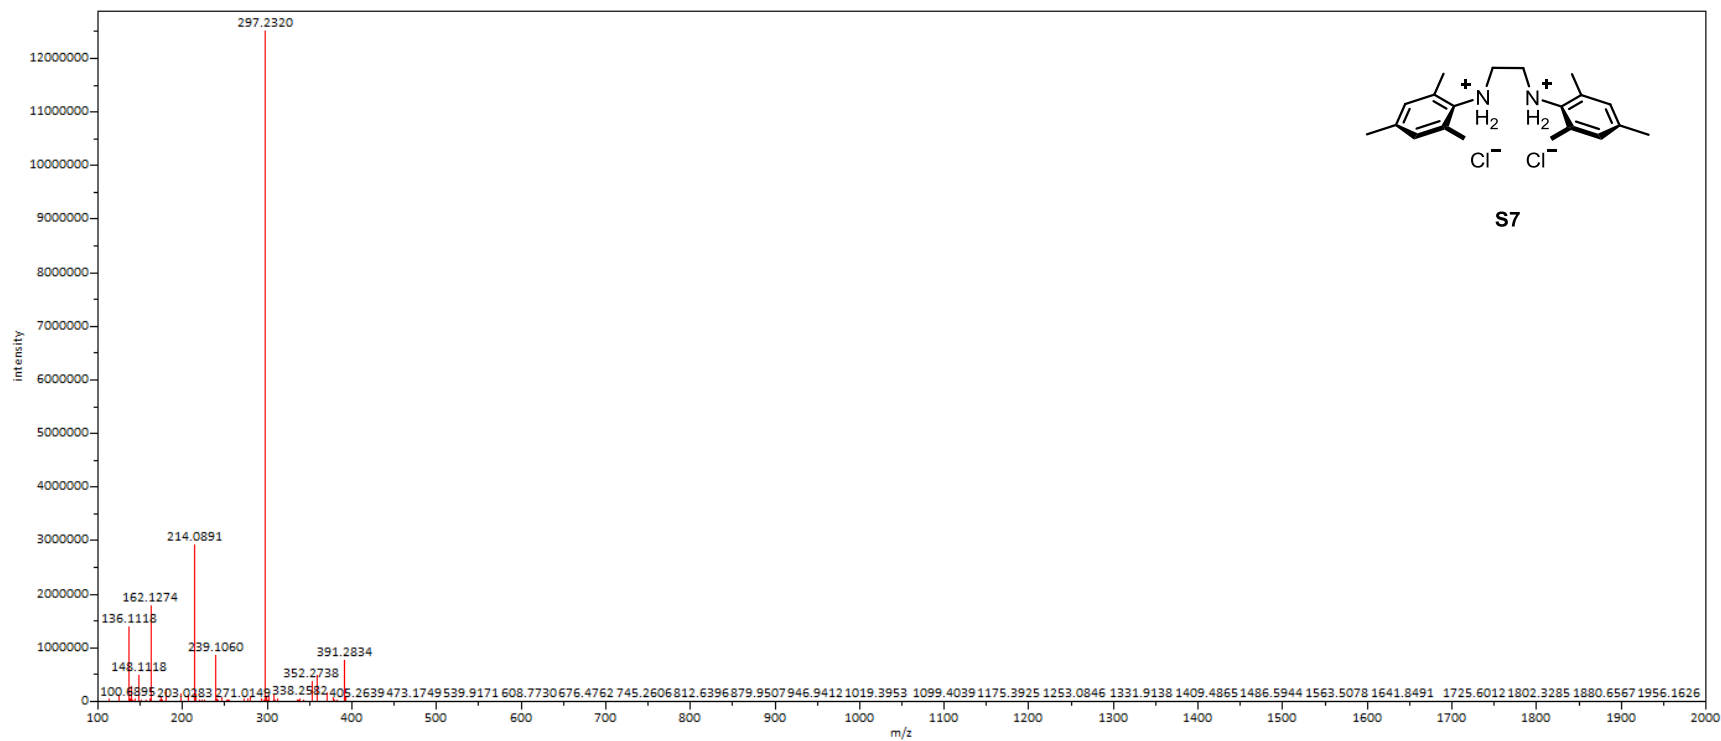

1,3-dimesityl-4,5-dihydro-1H-imidazol-3-ium chloride (S8)

<sup>1</sup>H NMR

9.42  
9.41  
9.41

6.91  
6.90

4.54  
4.53

2.35  
2.35  
2.26

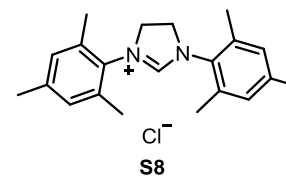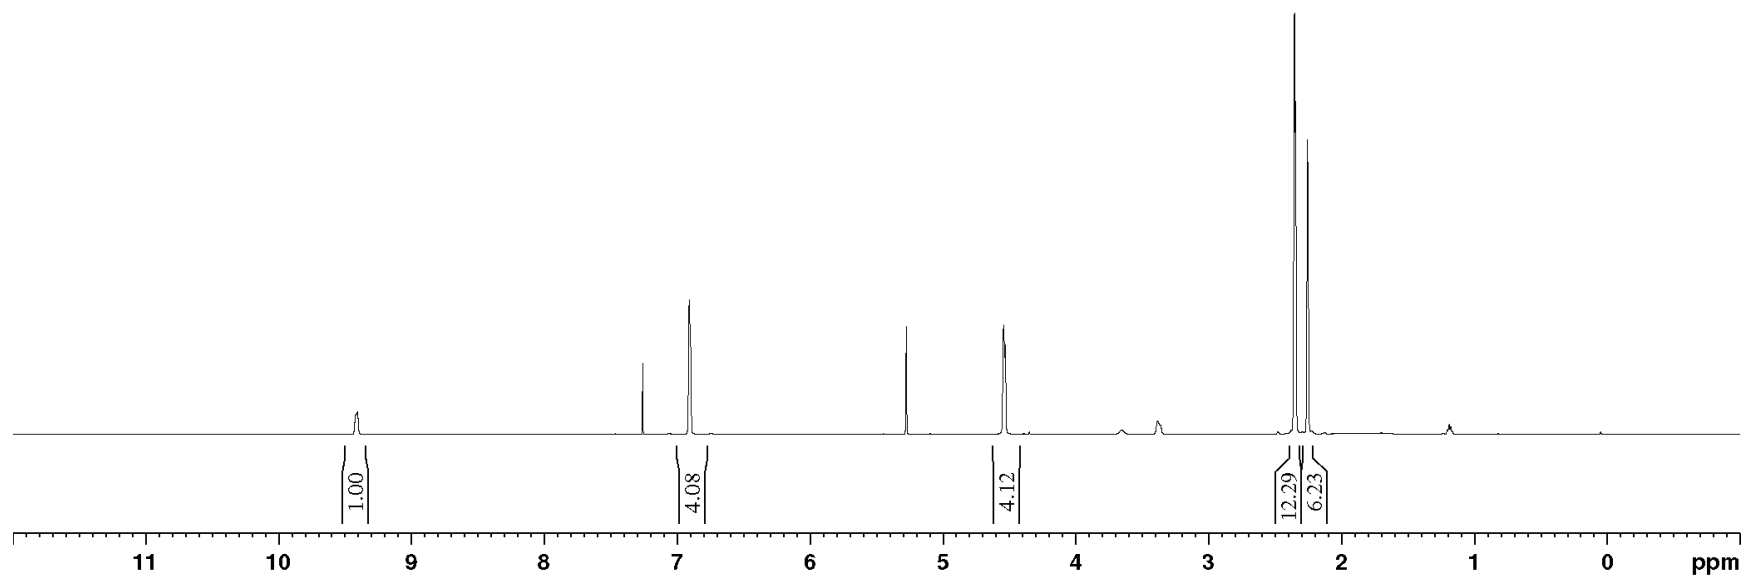

<sup>13</sup>C NMR

160.1

140.5

135.1

130.4

130.1

52.1

21.1

18.1

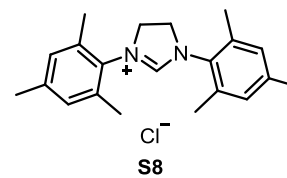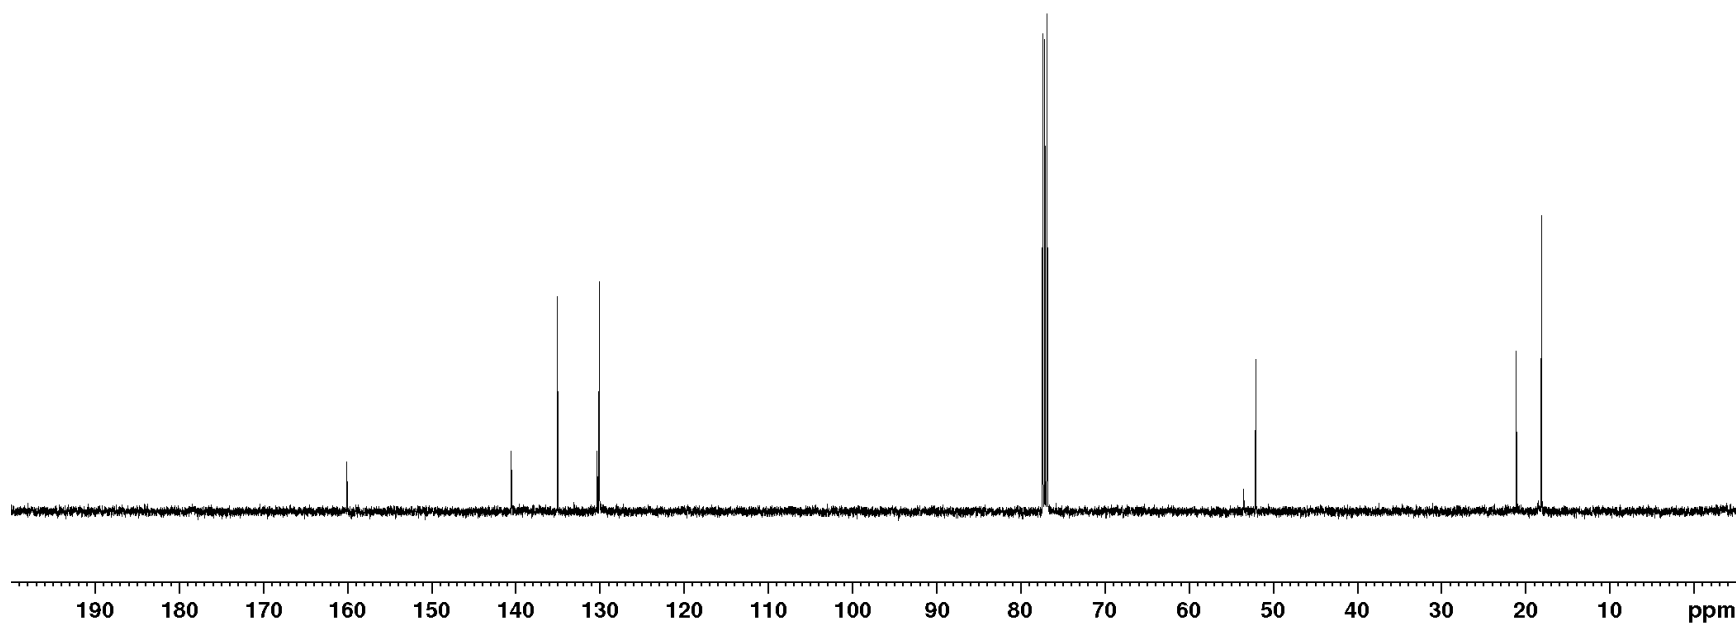

<sup>13</sup>C DEPT NMR

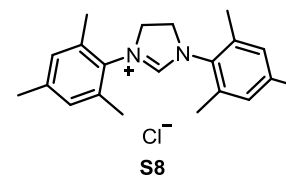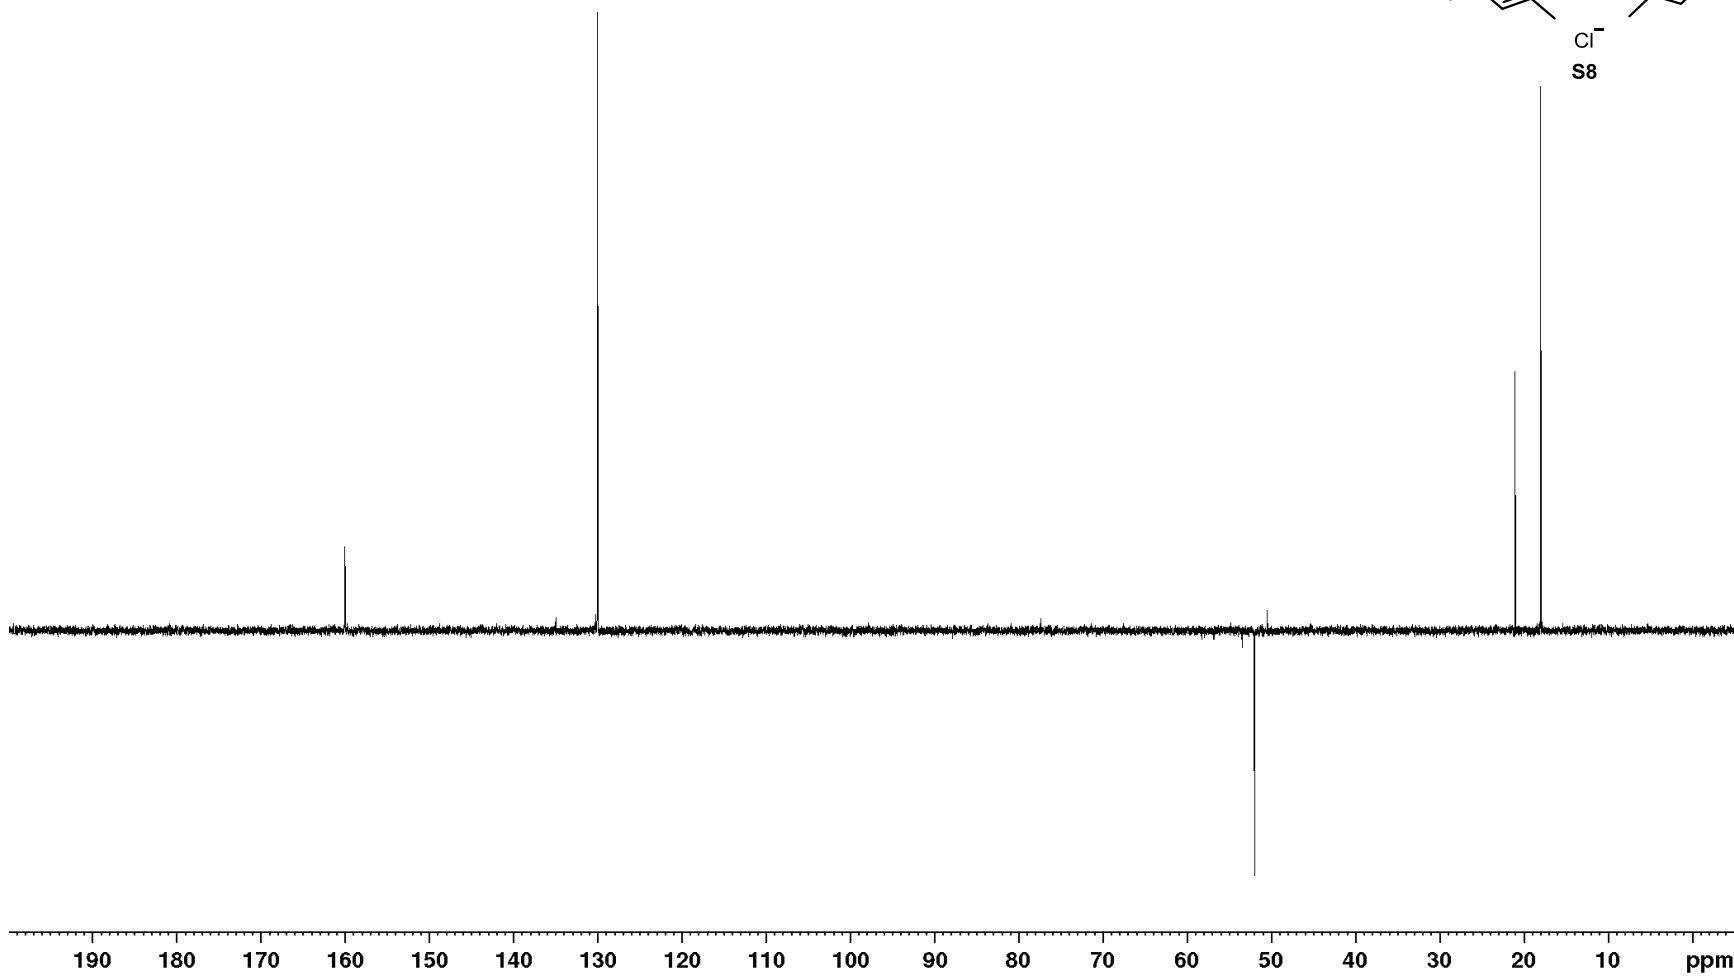



<sup>1</sup>H-<sup>1</sup>H COSY

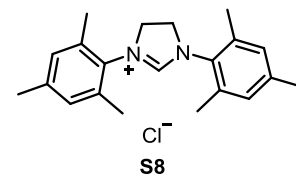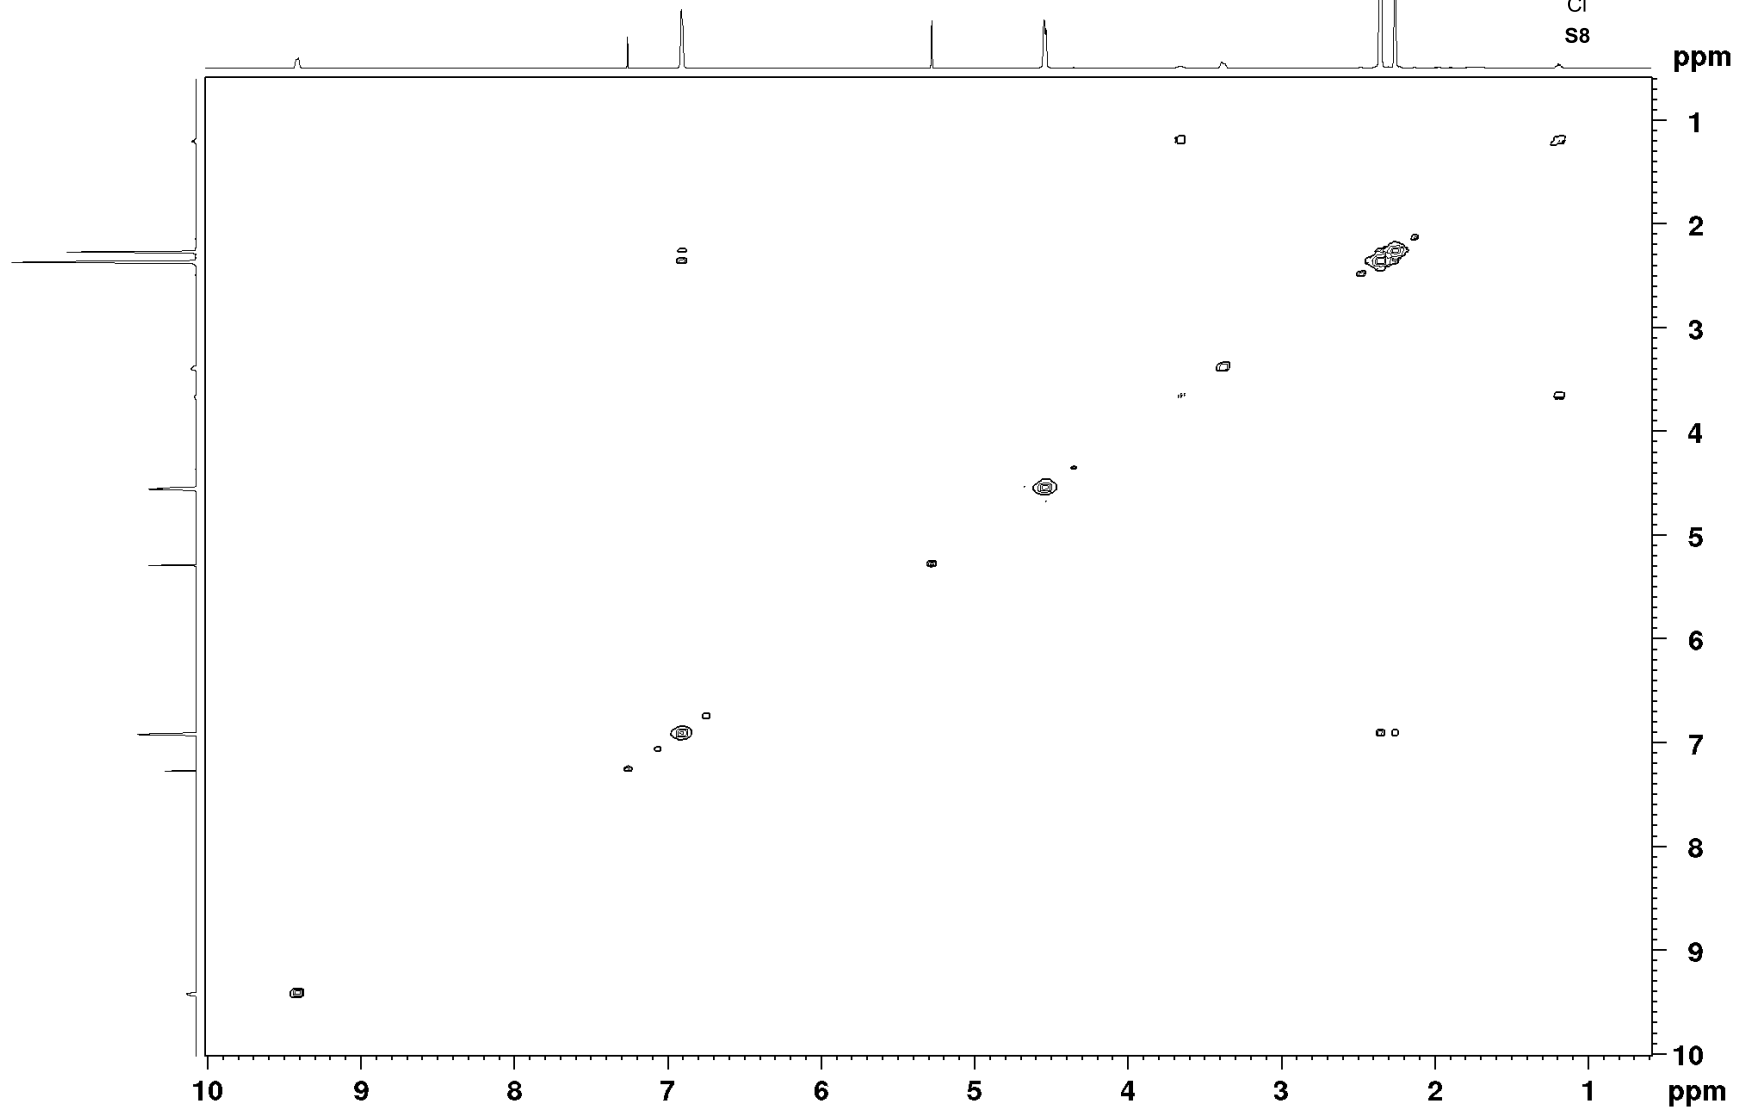

$^1\text{H}$ - $^{13}\text{C}$  HMQC

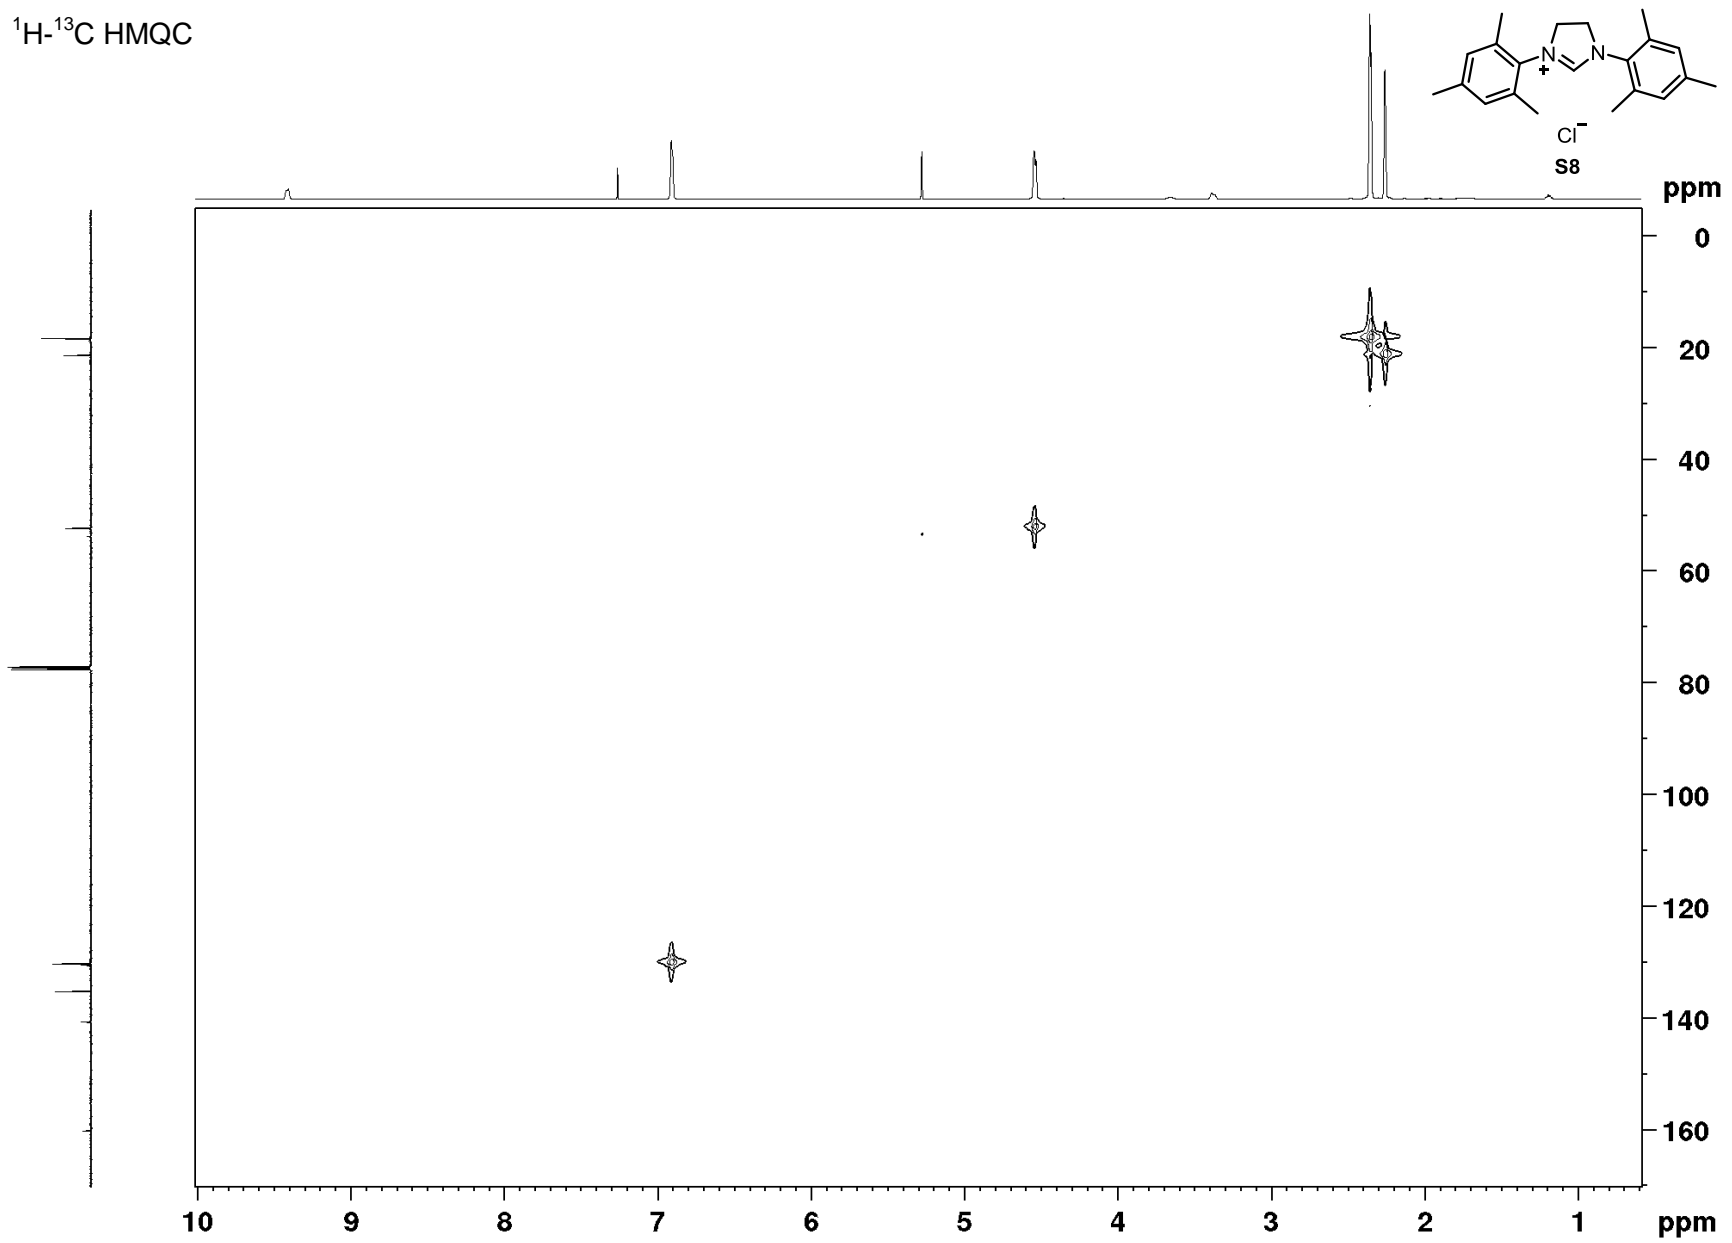

$^1\text{H}$ - $^{13}\text{C}$  HMBC

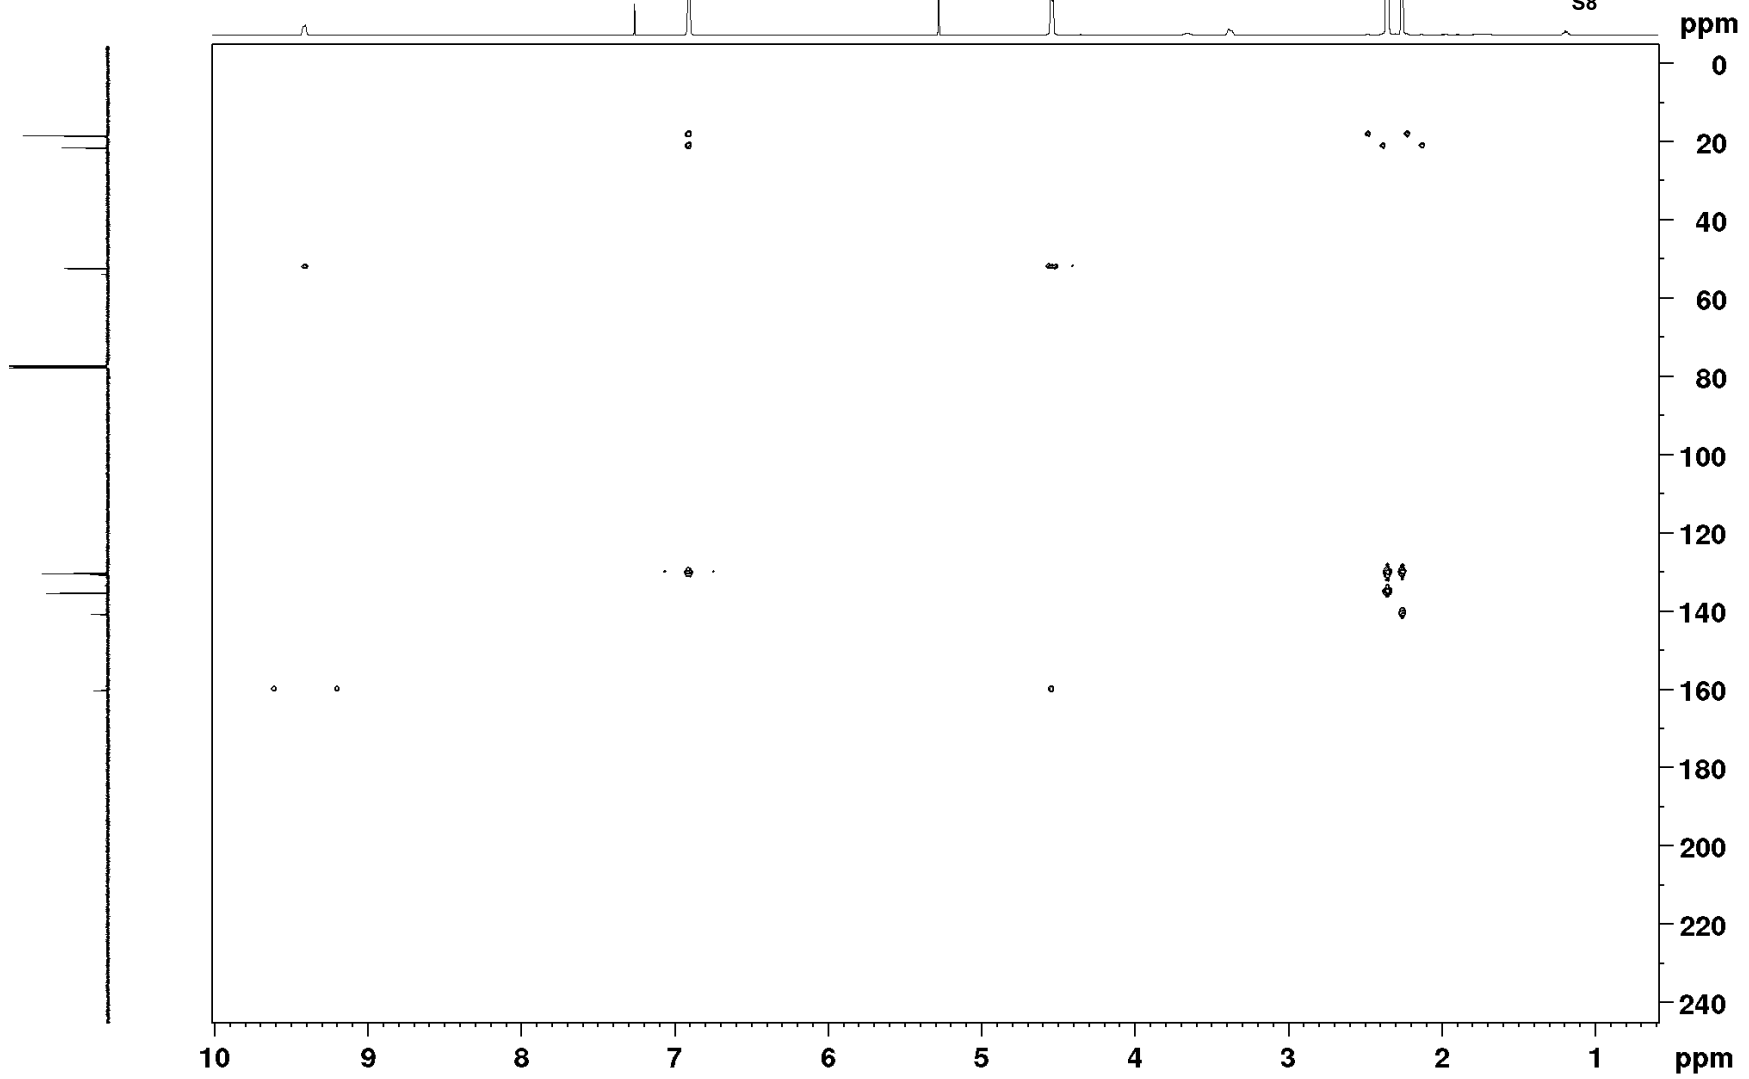

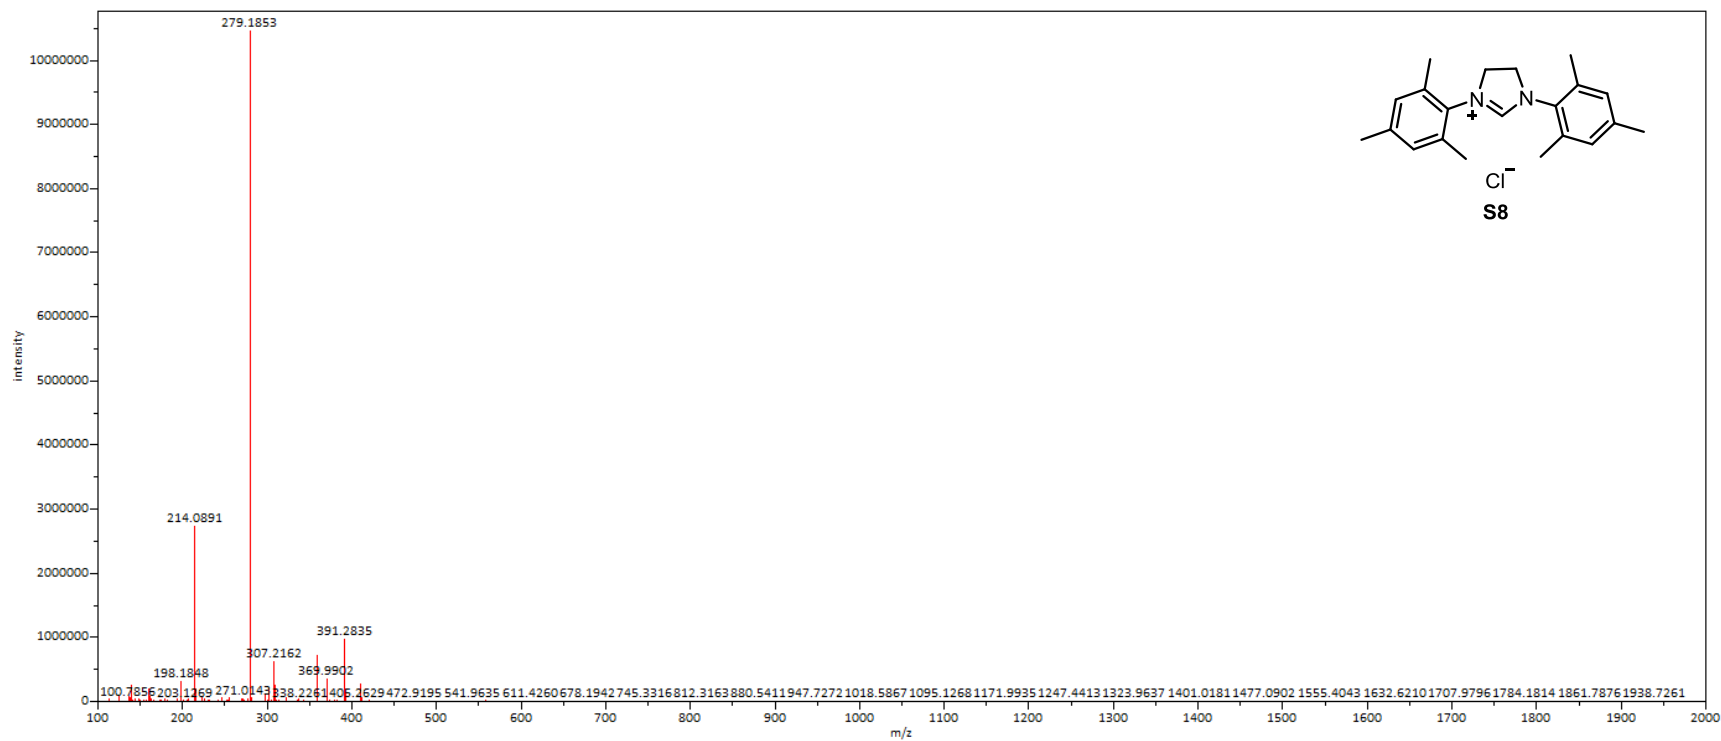

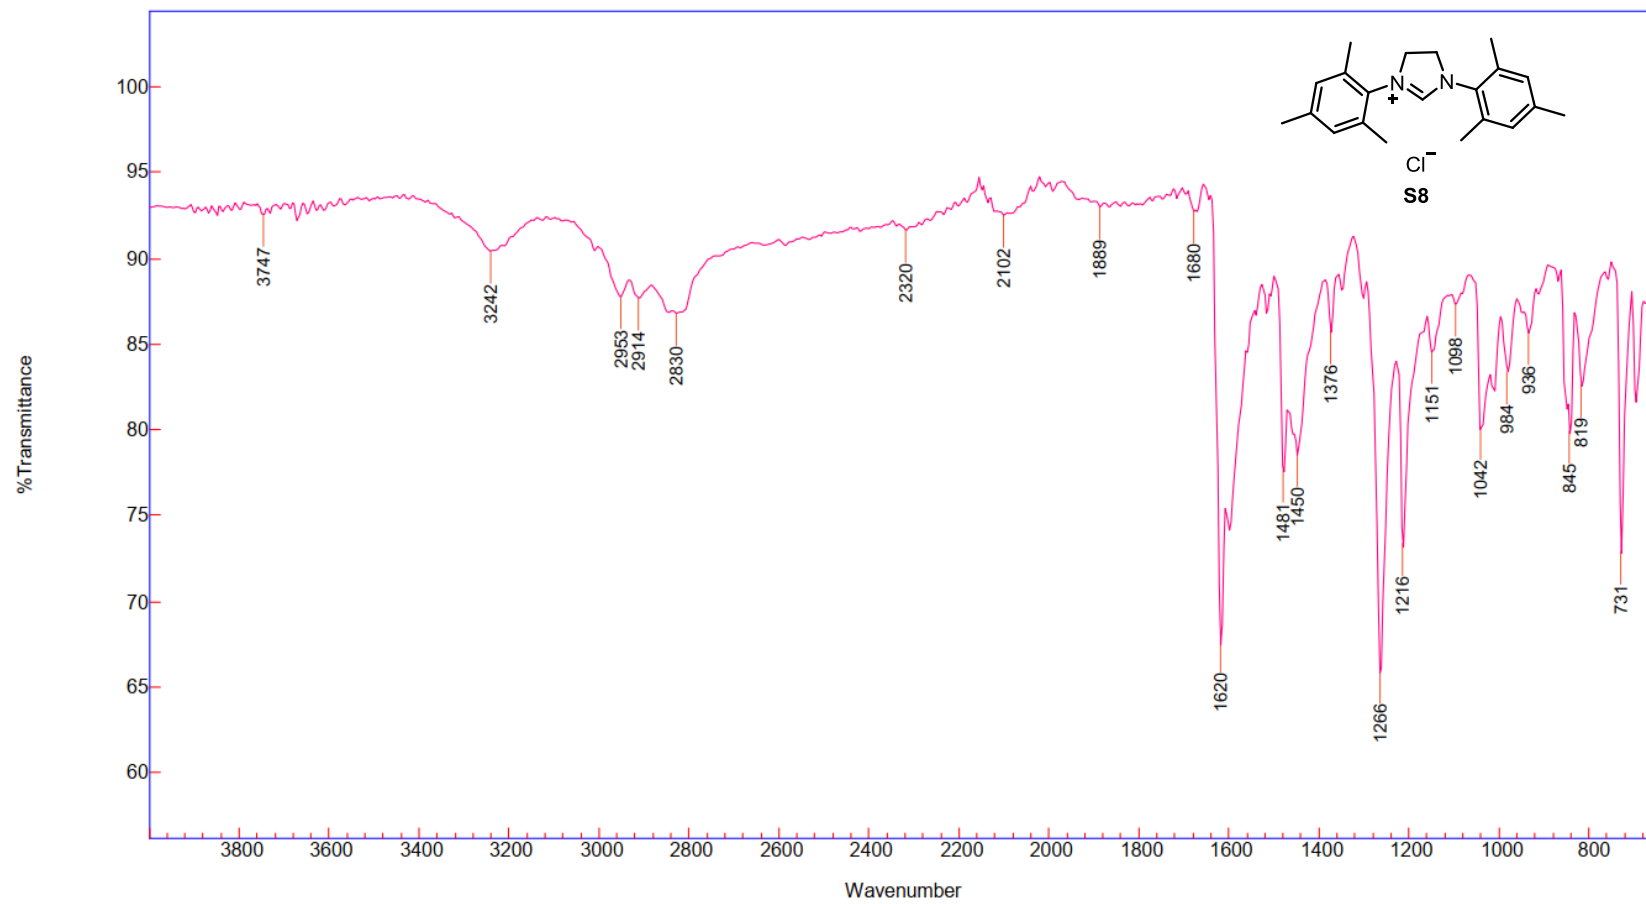

**(1,3-dimesitylimidazolidin-2-ylidene)copper(I) chloride (6)**

<sup>1</sup>H NMR

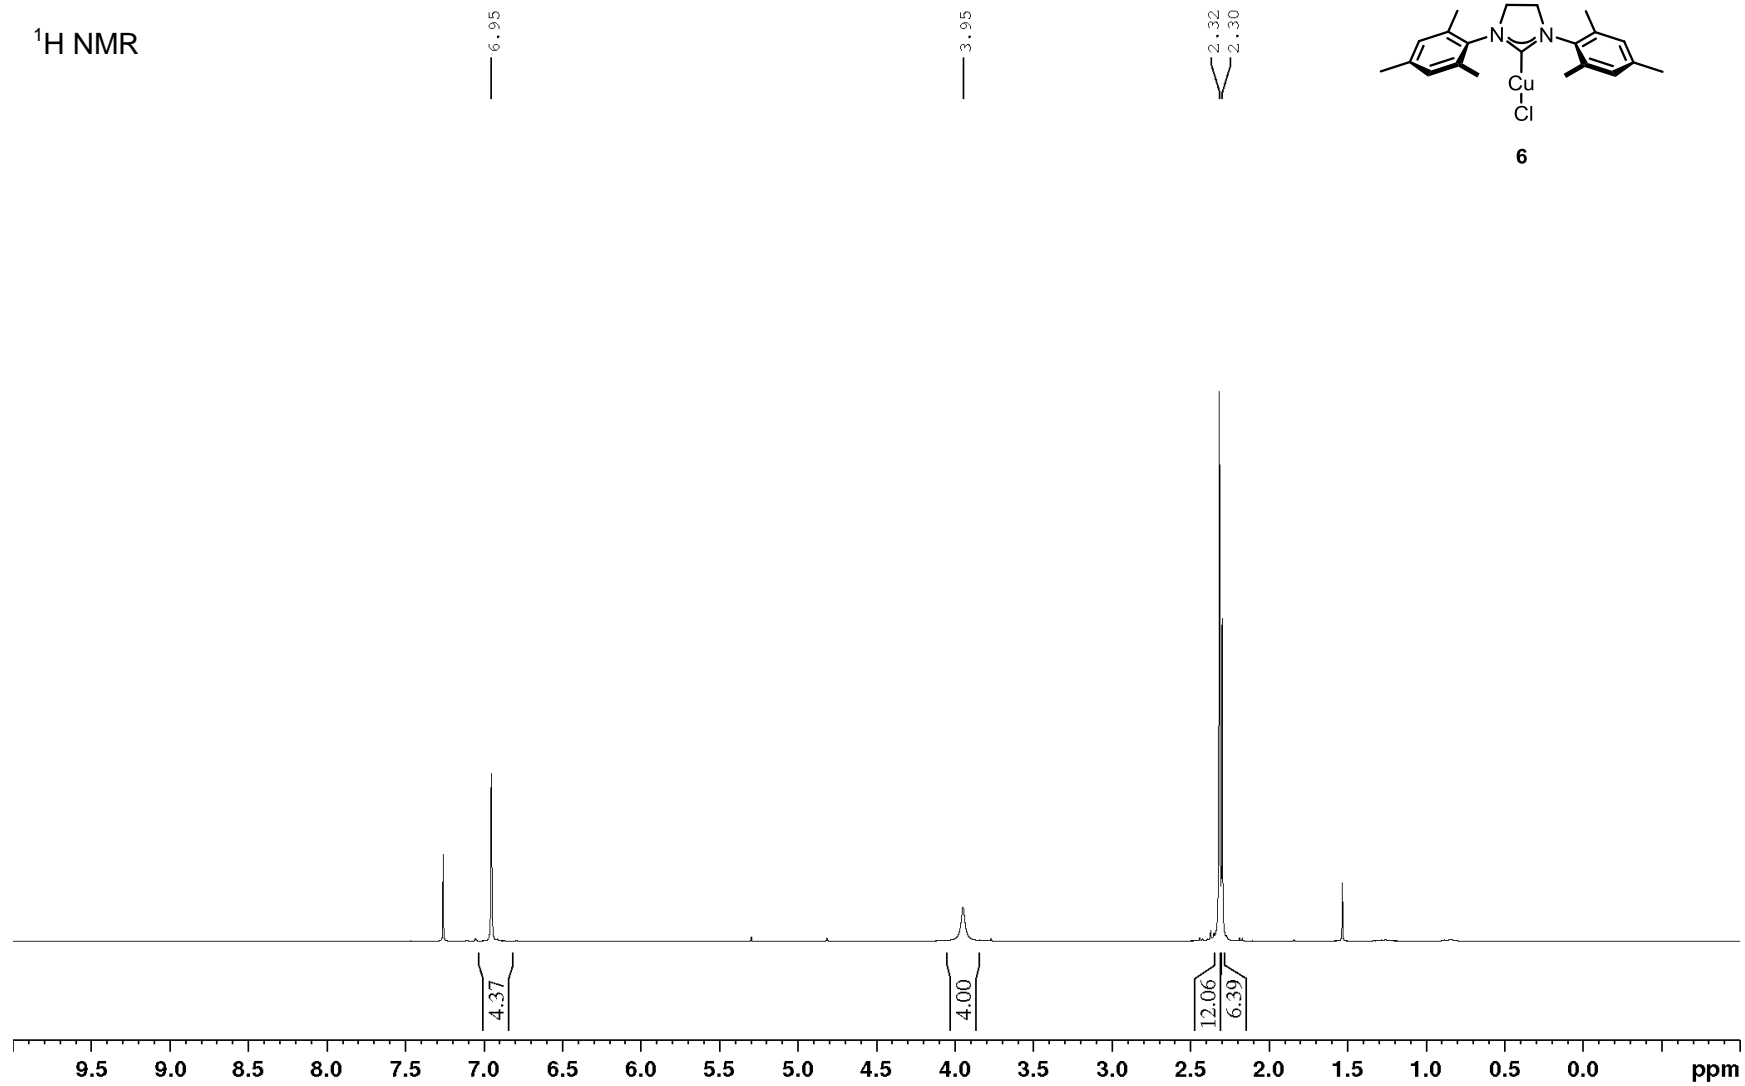

<sup>13</sup>C NMR

138.8  
135.5  
135.1  
129.9

51.1

21.2  
18.1

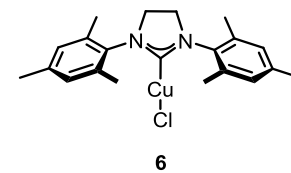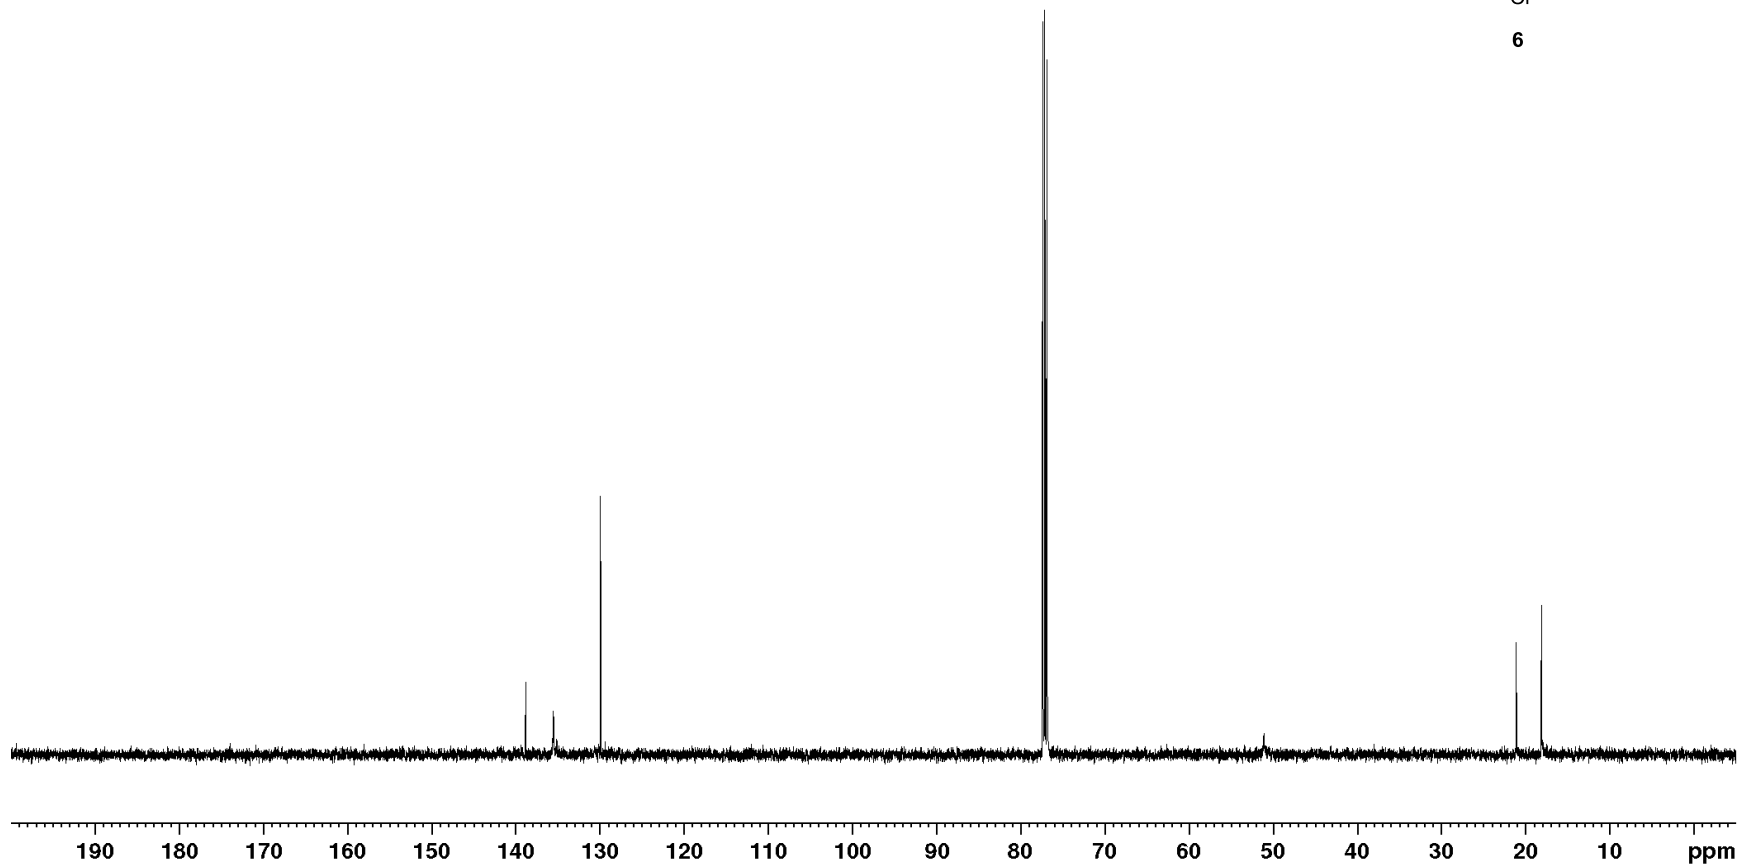

<sup>13</sup>C DEPT NMR

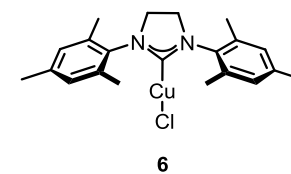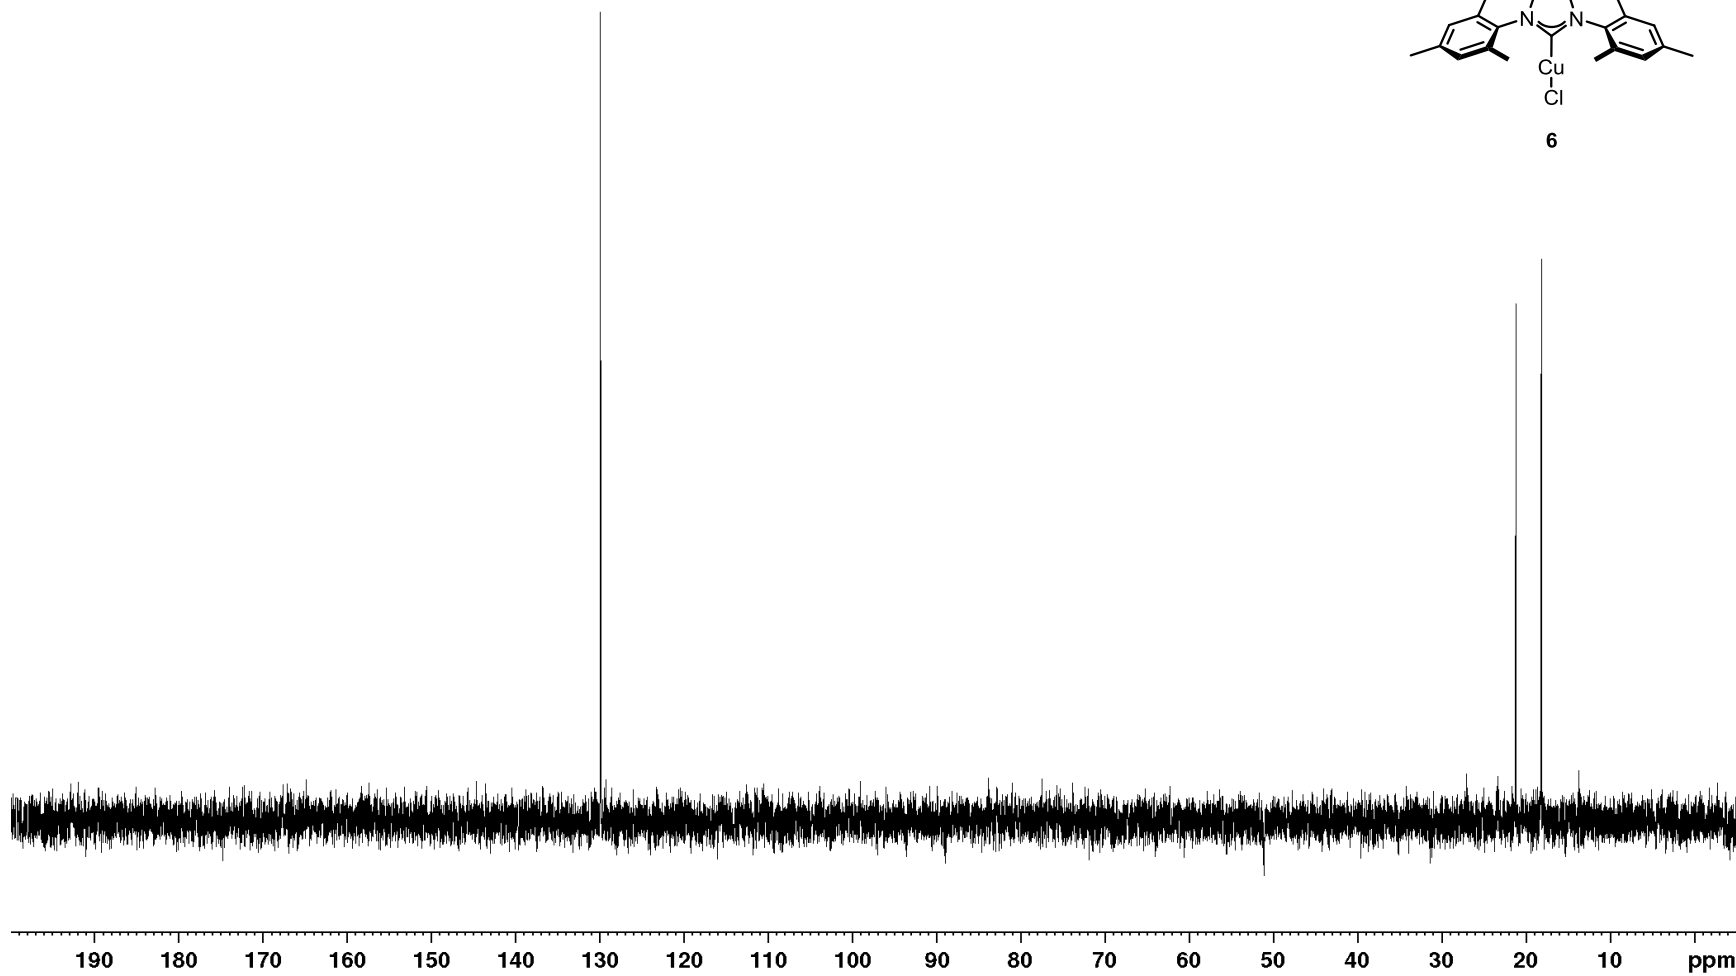



$^1\text{H}$ - $^1\text{H}$  COSY

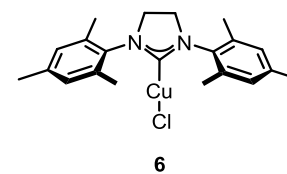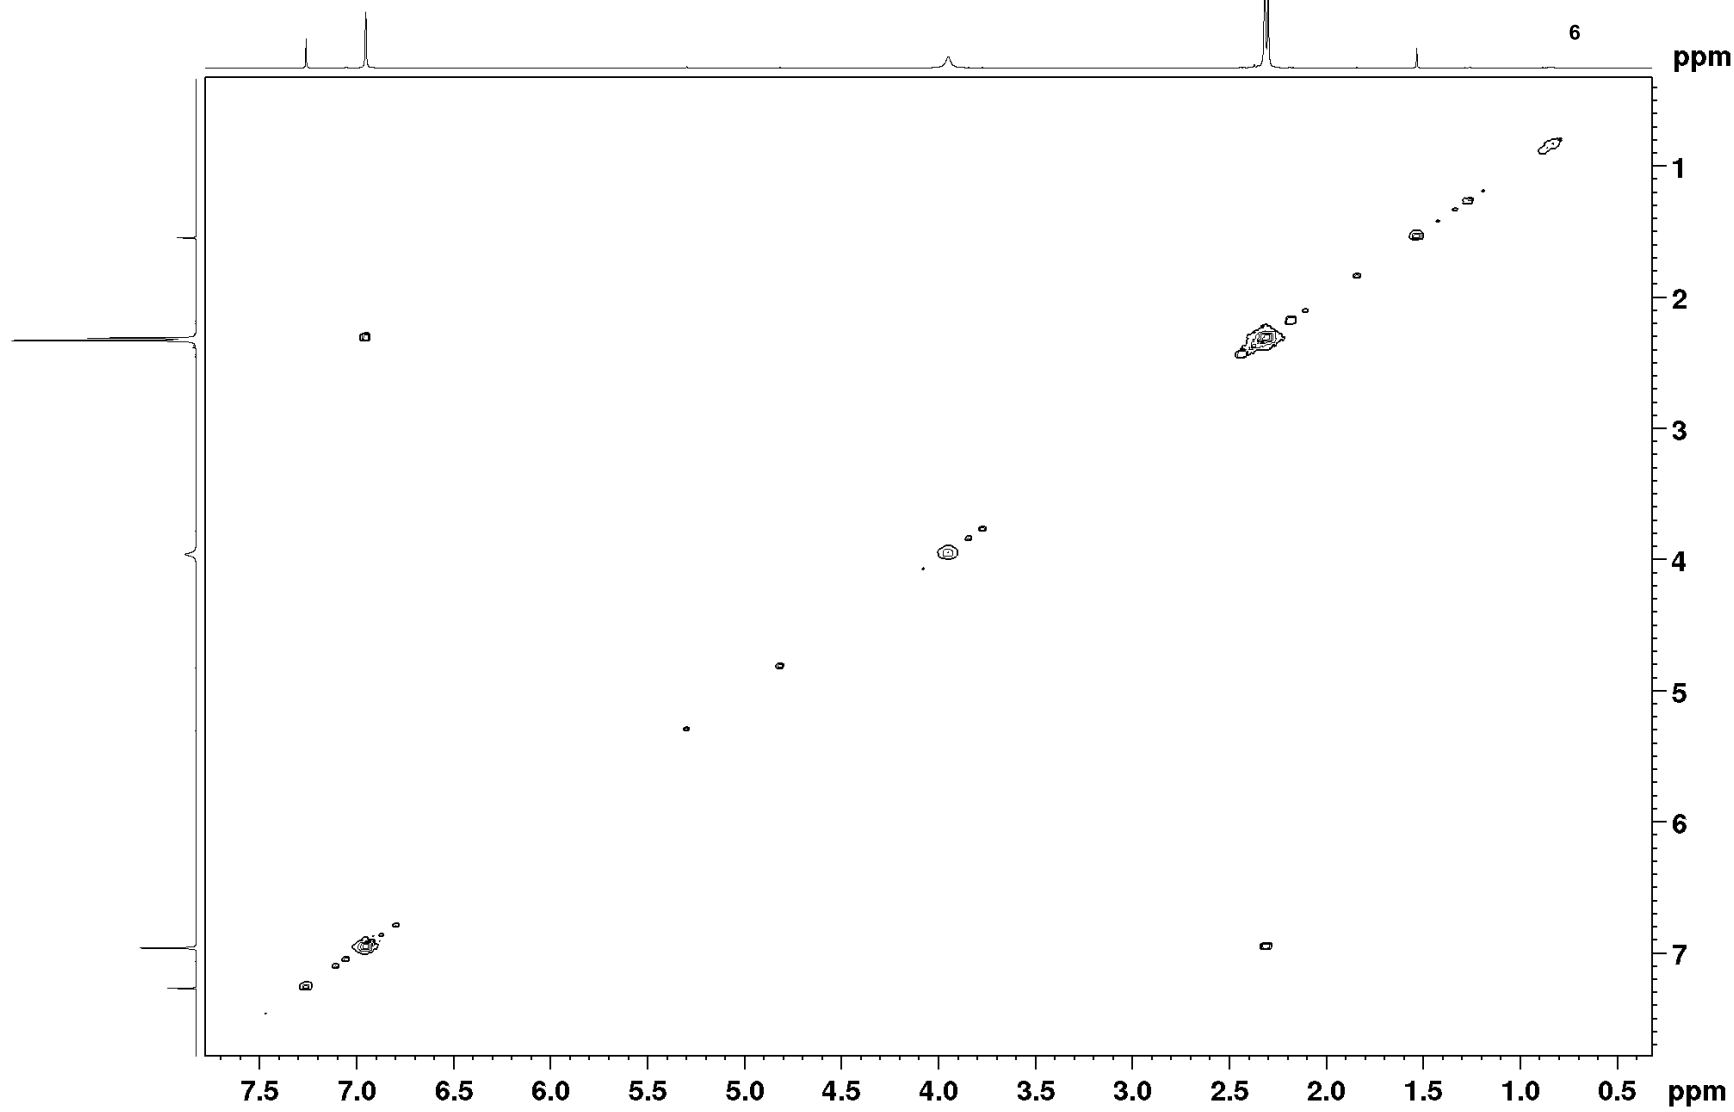

$^1\text{H}$ - $^{13}\text{C}$  HMQC

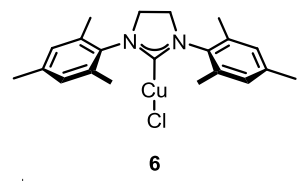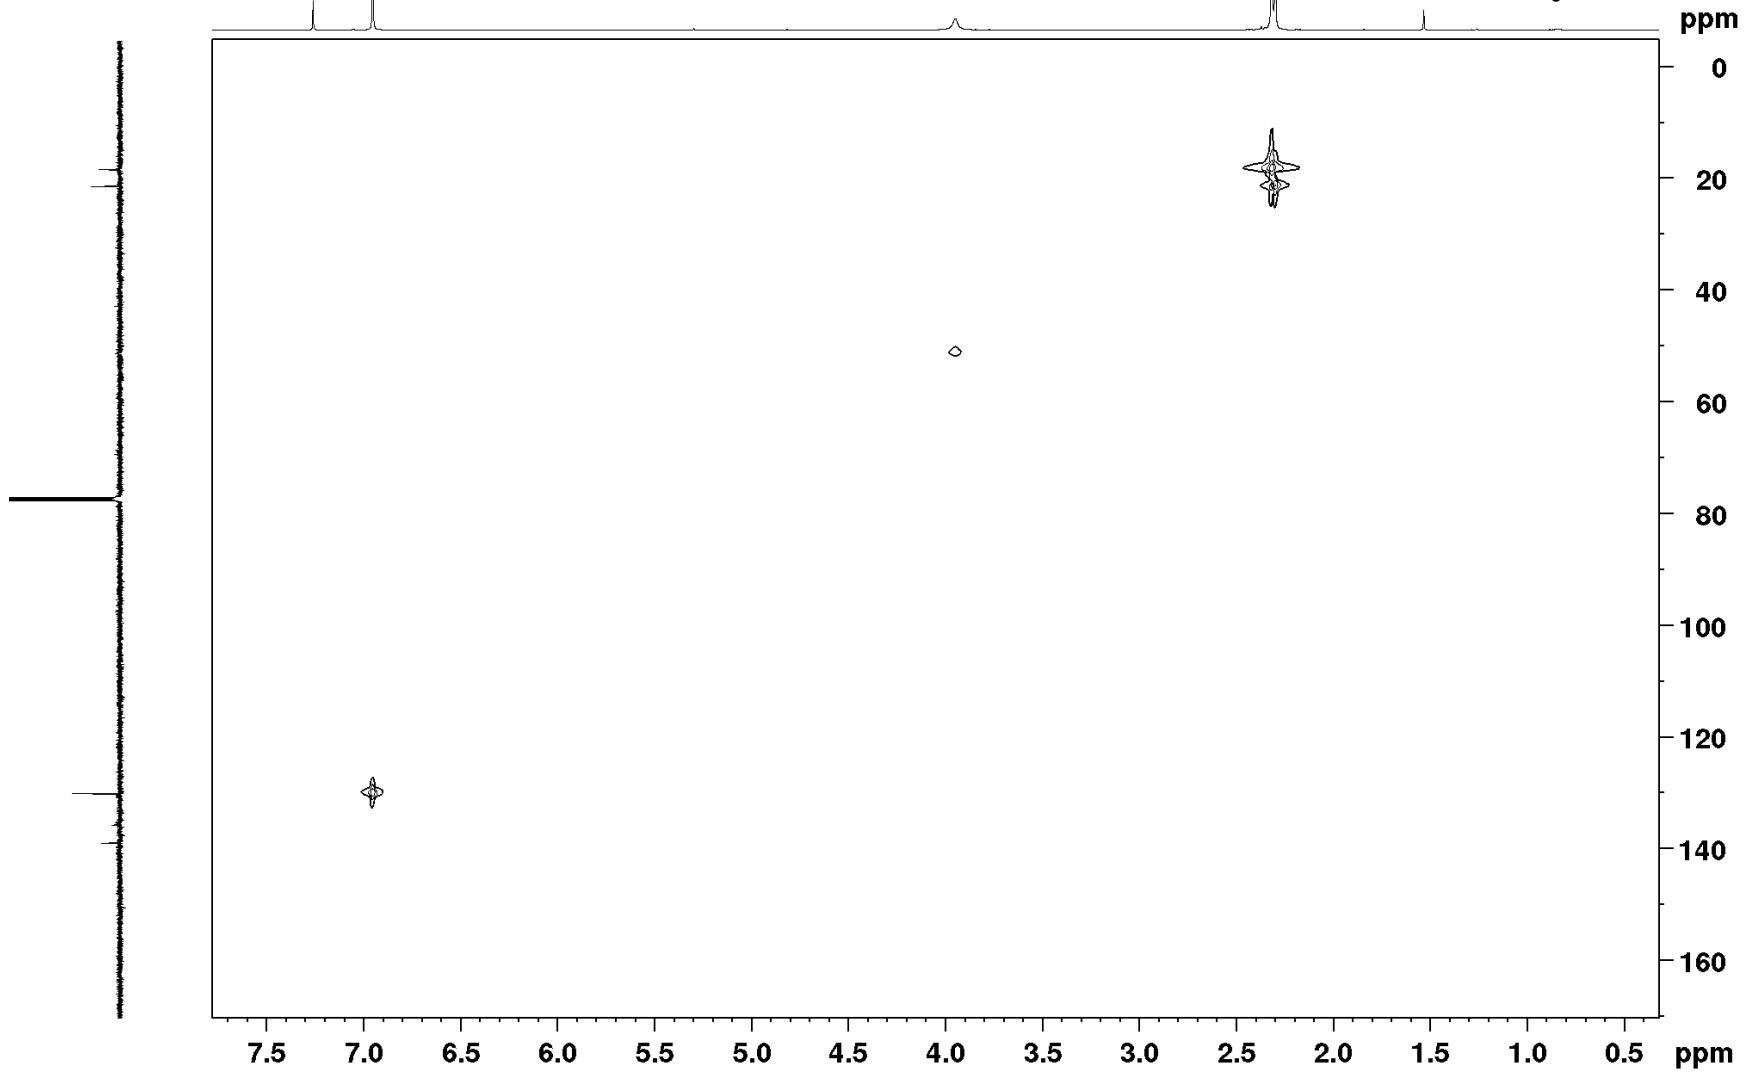

$^1\text{H}$ - $^{13}\text{C}$  HMBC

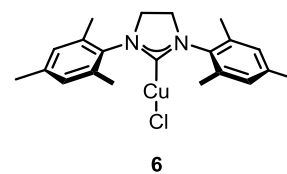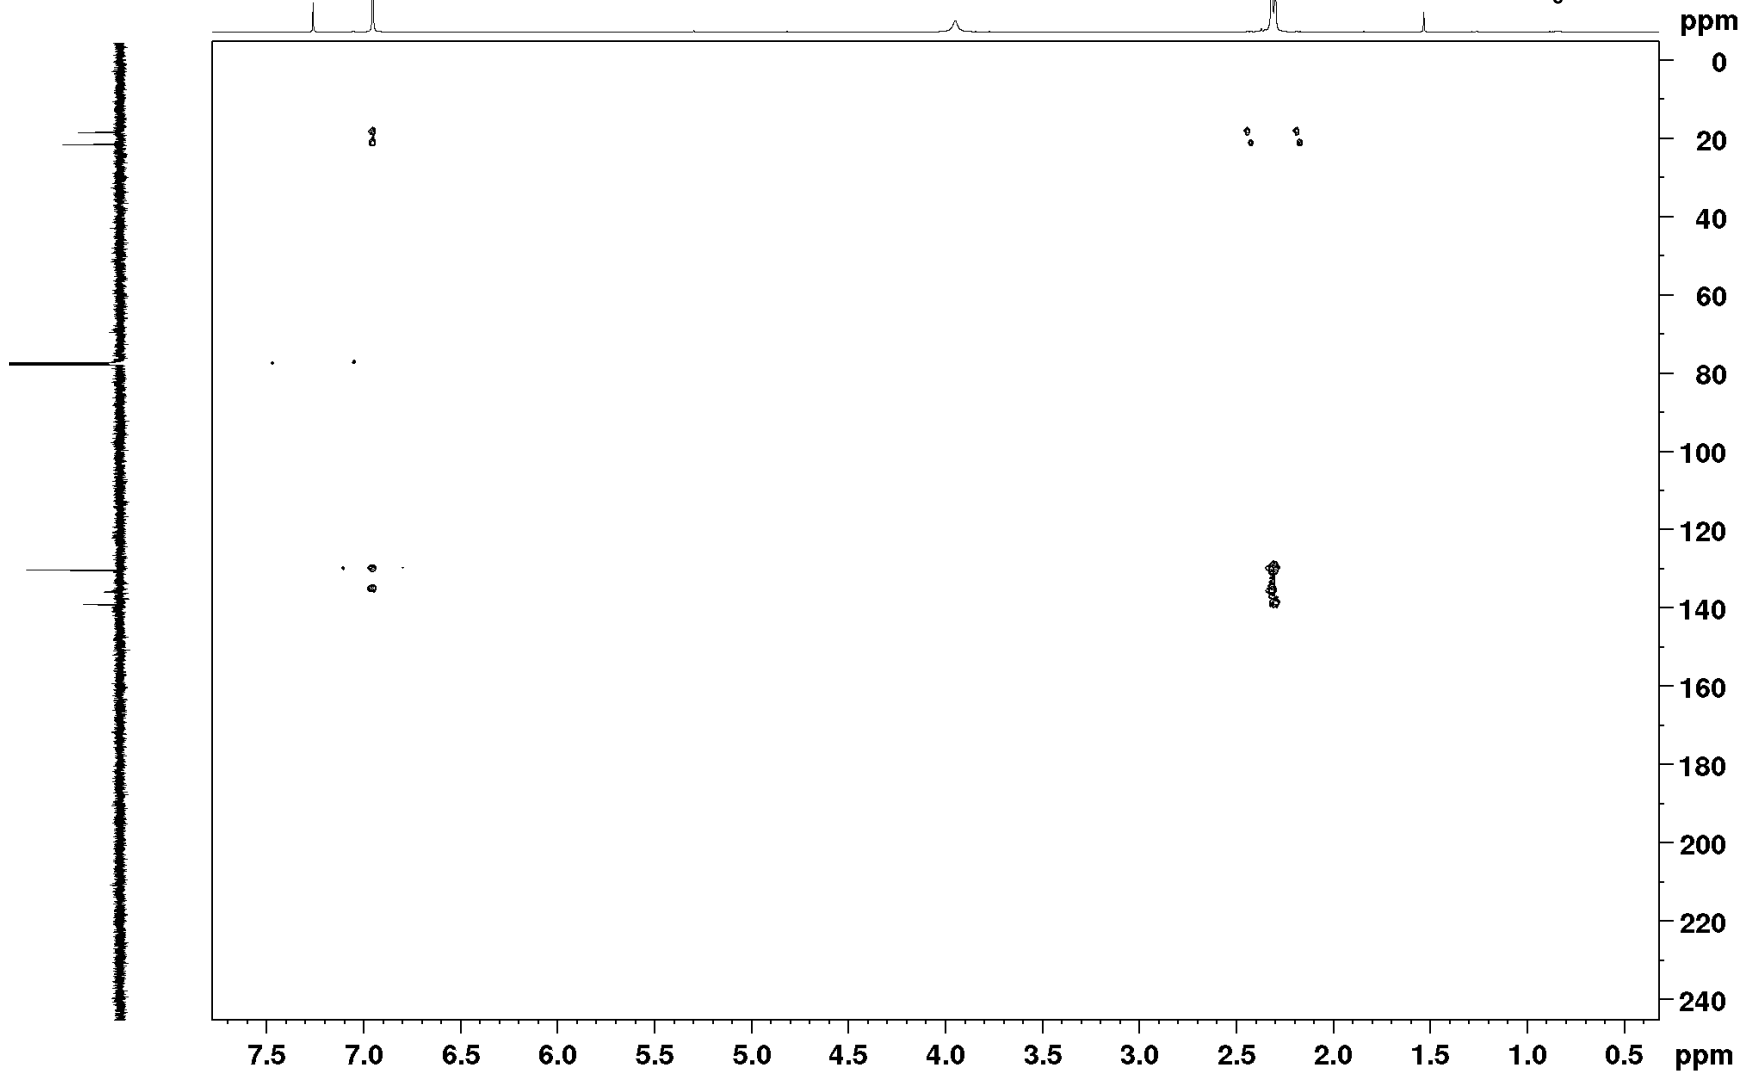

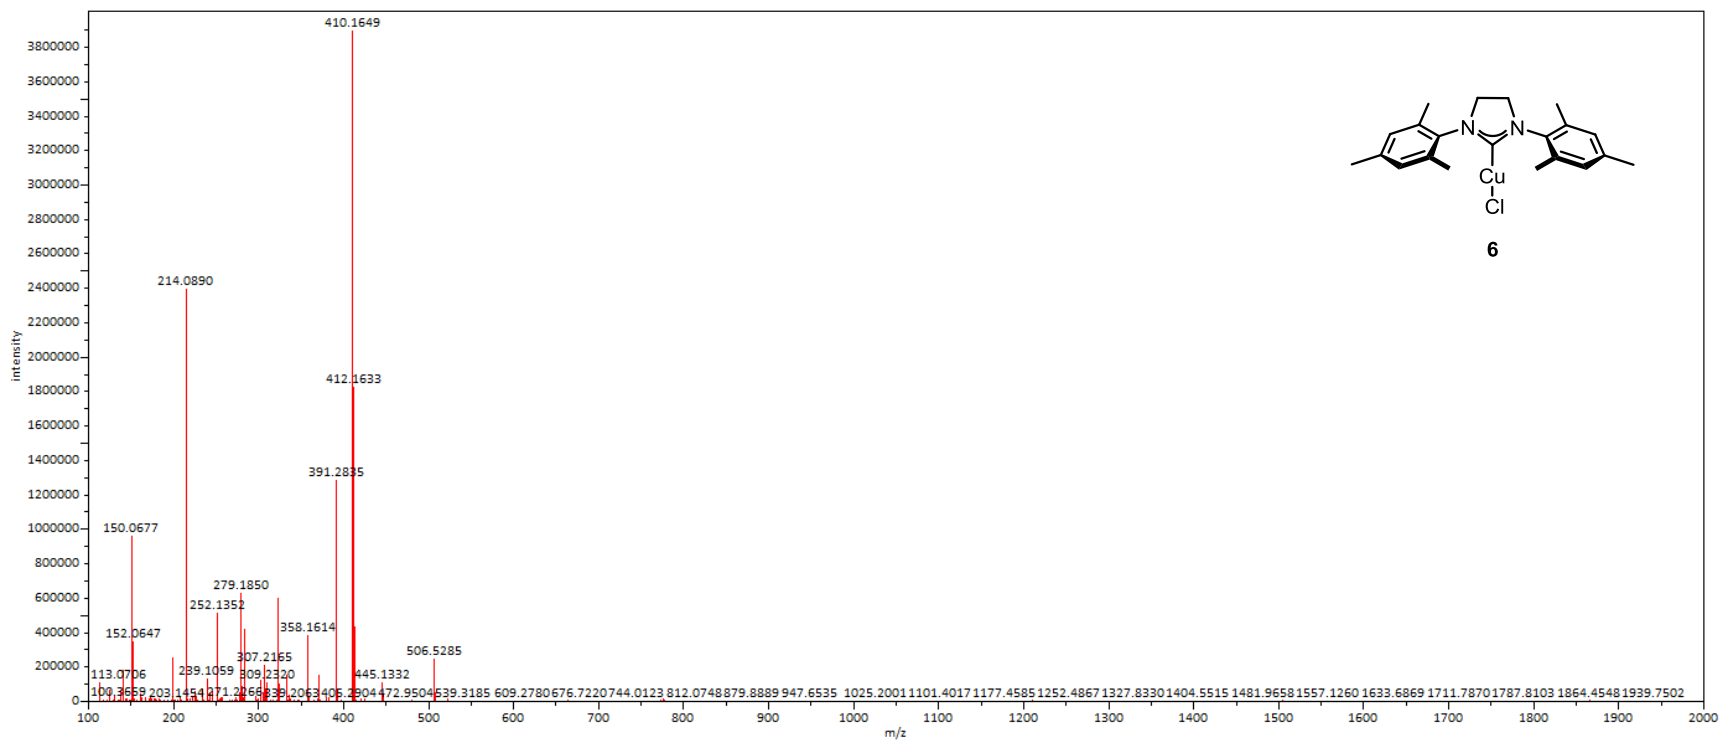

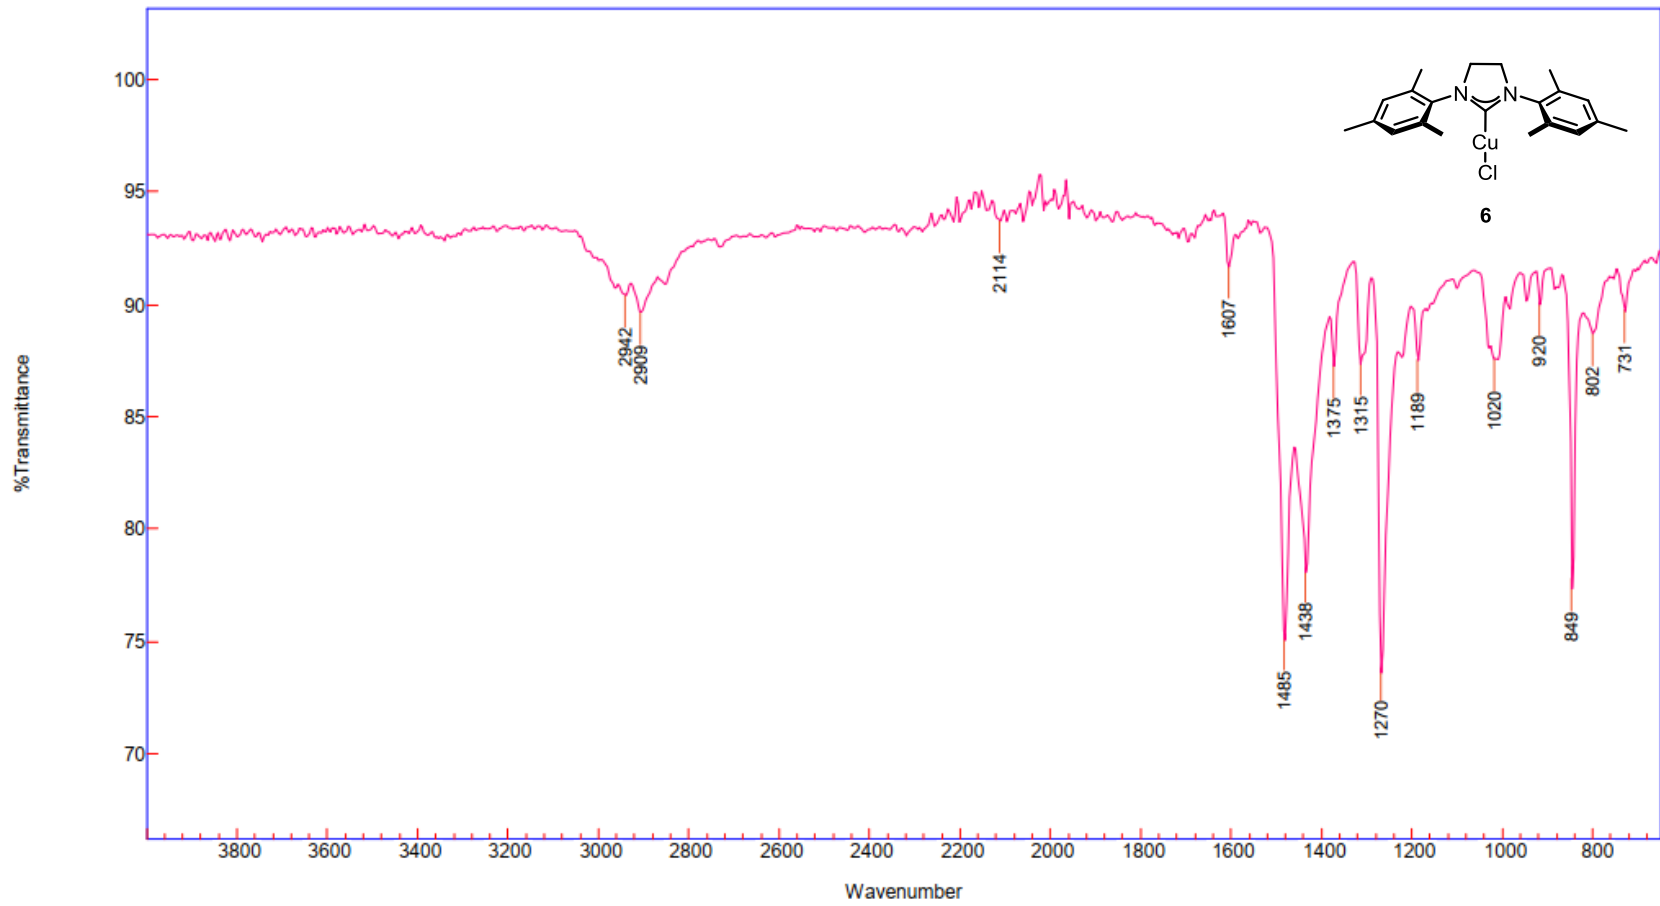

Ethyl 3-phenylbutanoate (2)

<sup>1</sup>H NMR

7.32  
7.30  
7.28  
7.24  
7.22  
7.20  
7.18  
7.18

4.11  
4.09  
4.07  
4.06  
3.33  
3.31  
3.29  
3.28  
3.26  
3.24  
2.65  
2.63  
2.61  
2.59  
2.57  
2.55  
2.53  
2.51  
1.32  
1.30  
1.20  
1.20  
1.19  
1.18  
1.17  
1.17

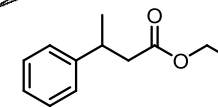

2

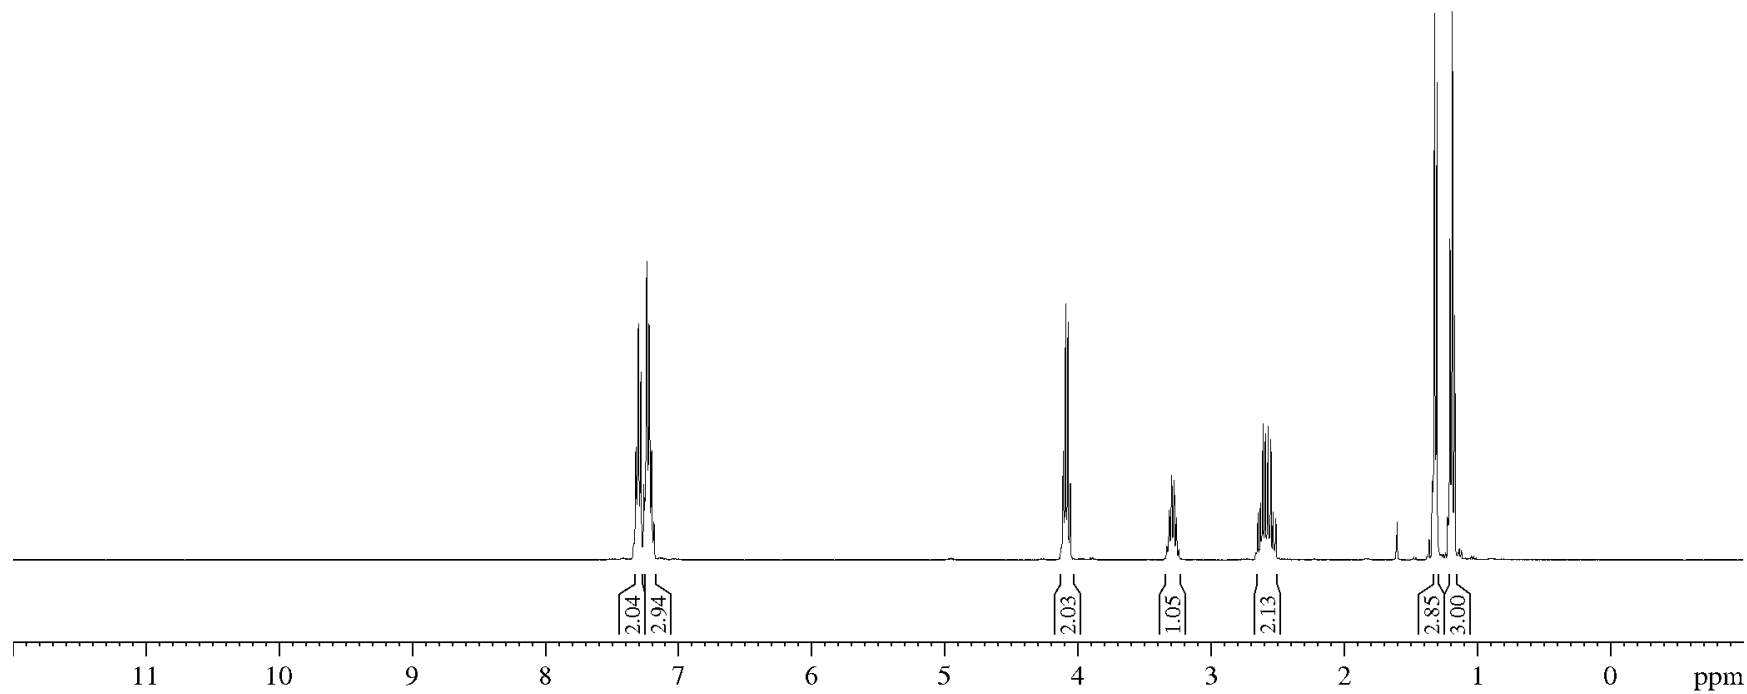

$^{13}\text{C}$  NMR

172.5

145.9

128.6  
126.9  
126.5

60.4

43.1

36.6

21.9

14.3

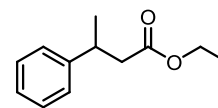

2

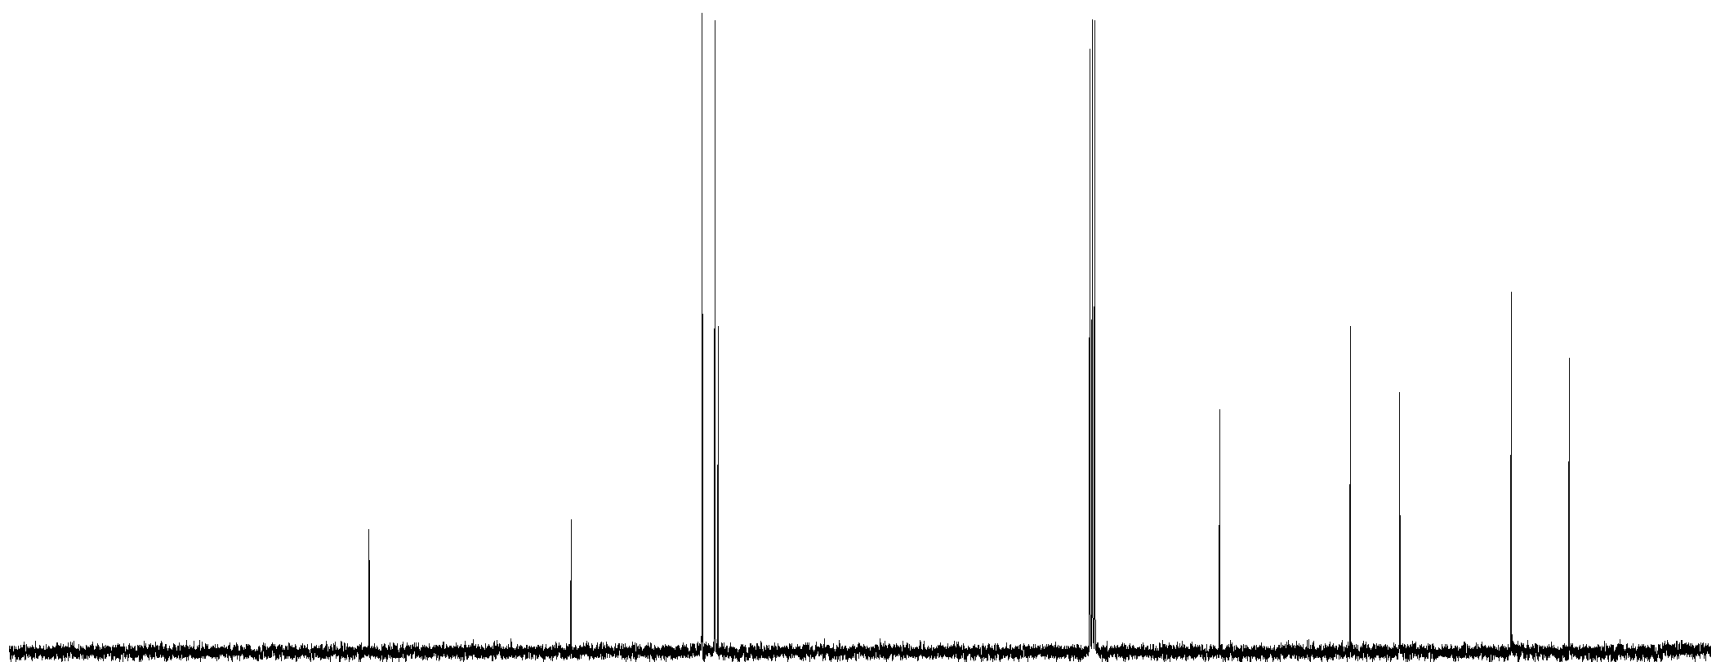

210 200 190 180 170 160 150 140 130 120 110 100 90 80 70 60 50 40 30 20 10 ppm

<sup>13</sup>C DEPT NMR

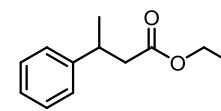

**2**

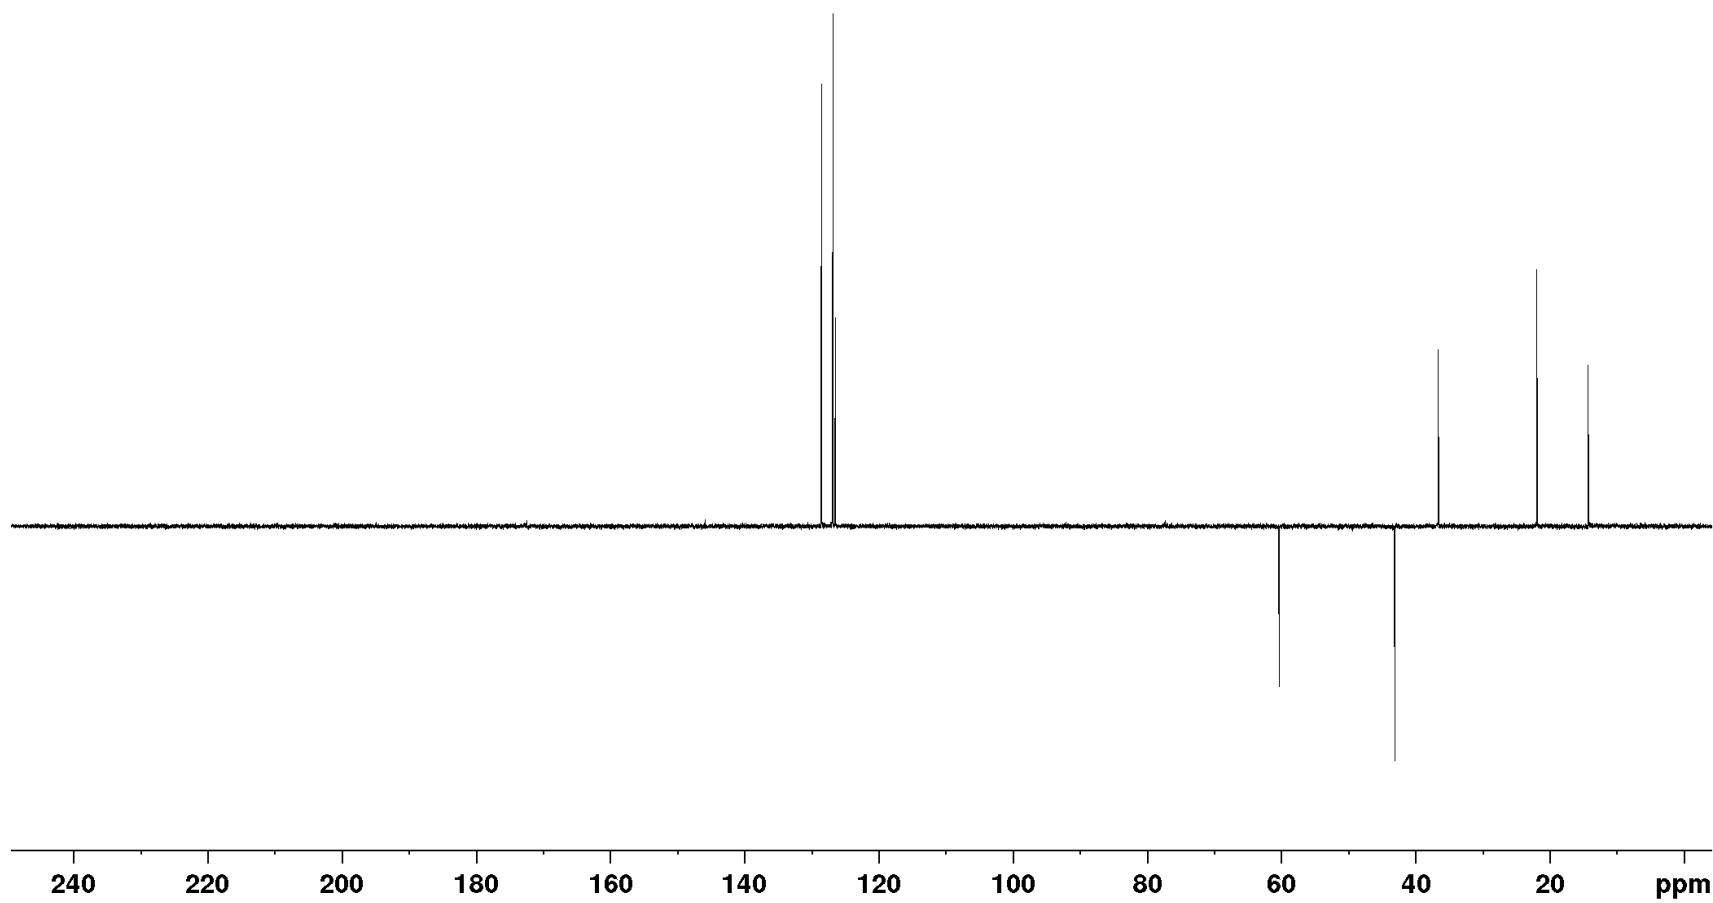



$^1\text{H}$ - $^{13}\text{C}$  HMQC

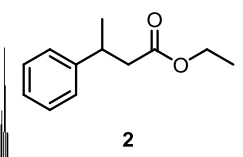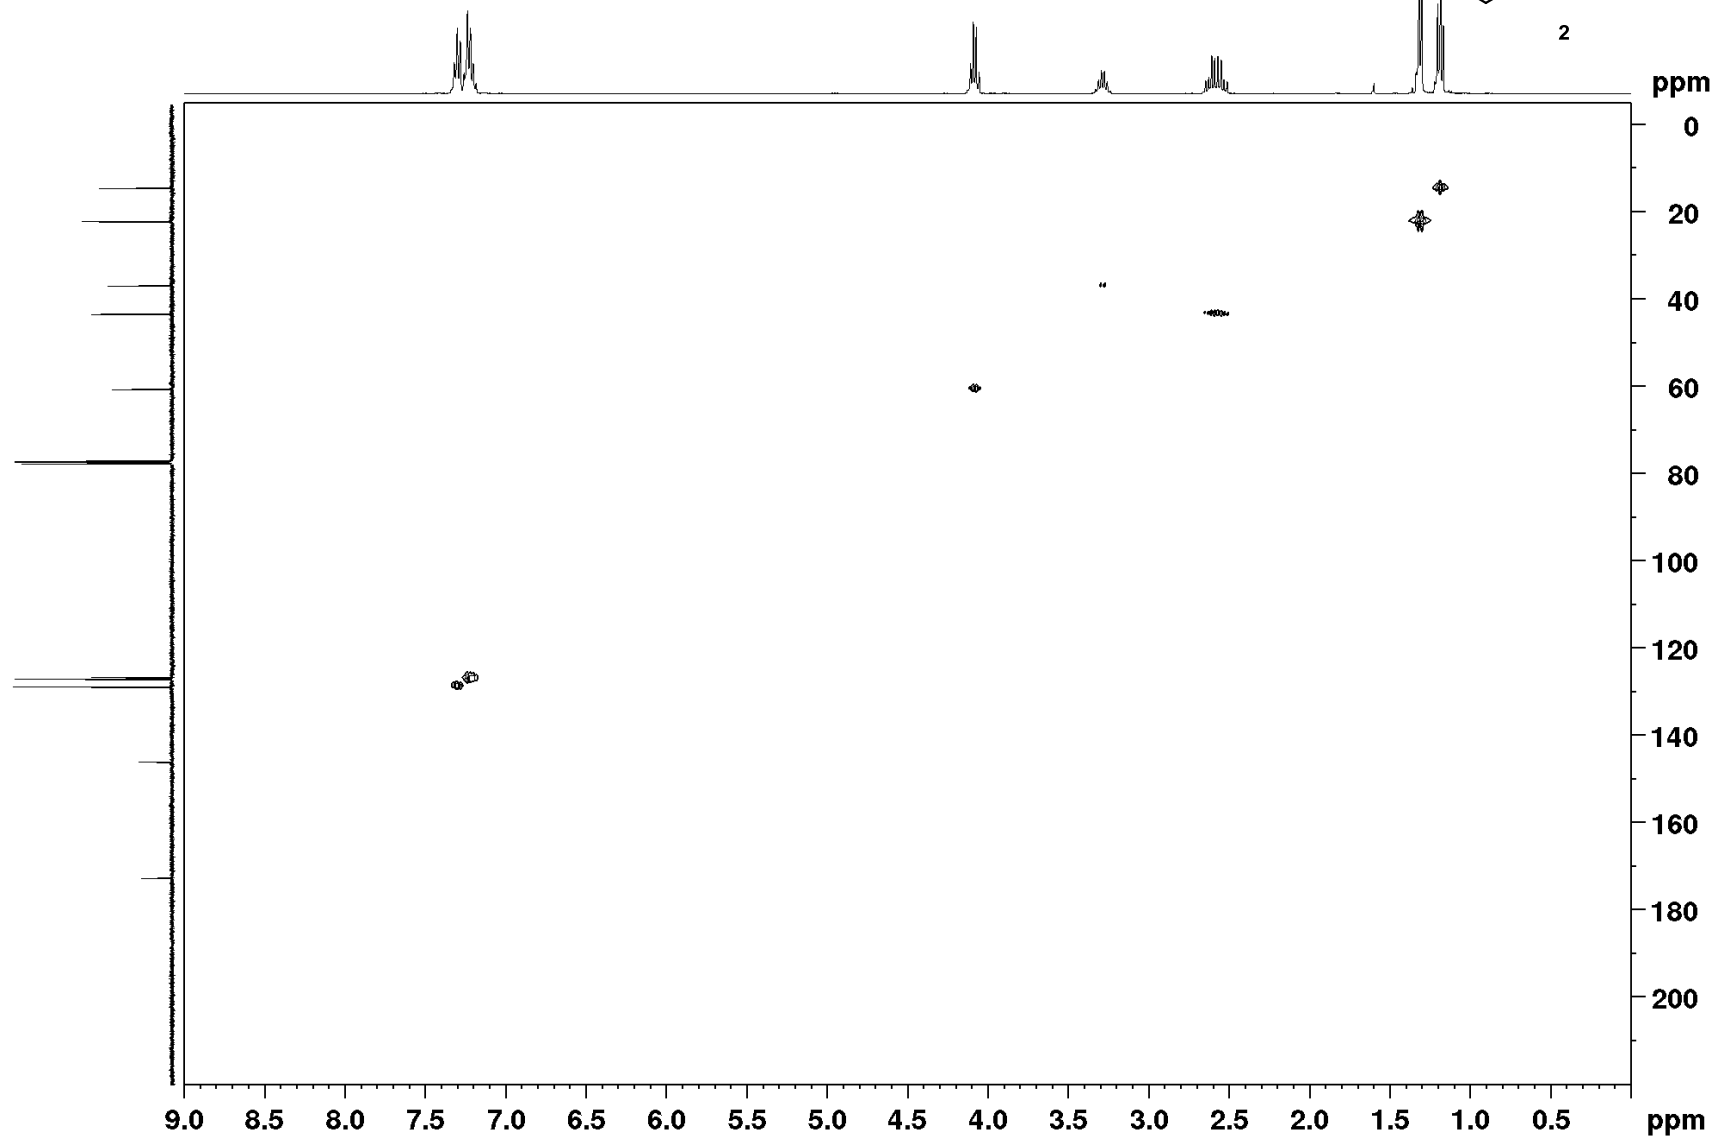

$^1\text{H}$ - $^{13}\text{C}$  HMBC

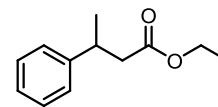

2

ppm

0

20

40

60

80

100

120

140

160

180

200

ppm

9.0

8.5

8.0

7.5

7.0

6.5

6.0

5.5

5.0

4.5

4.0

3.5

3.0

2.5

2.0

1.5

1.0

0.5

$^1\text{H}$ - $^1\text{H}$  COSY

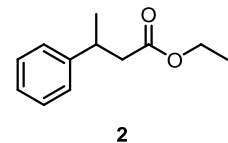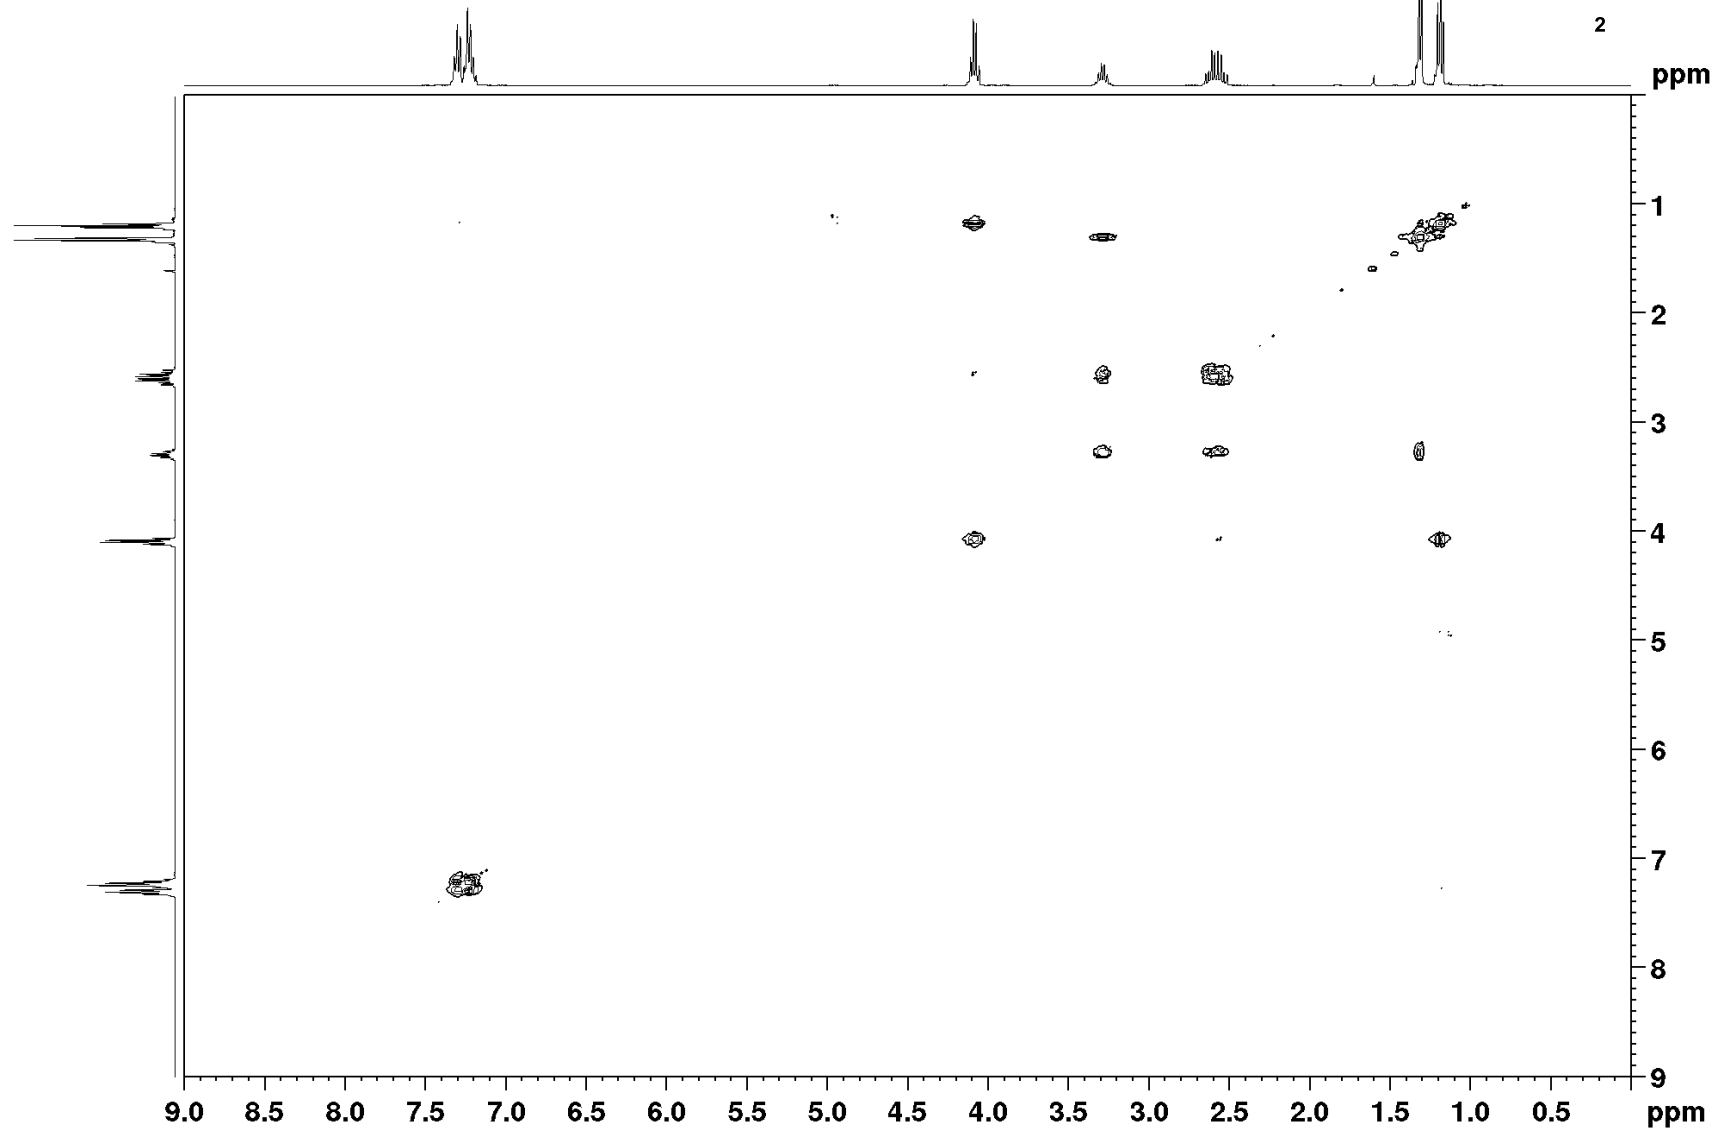

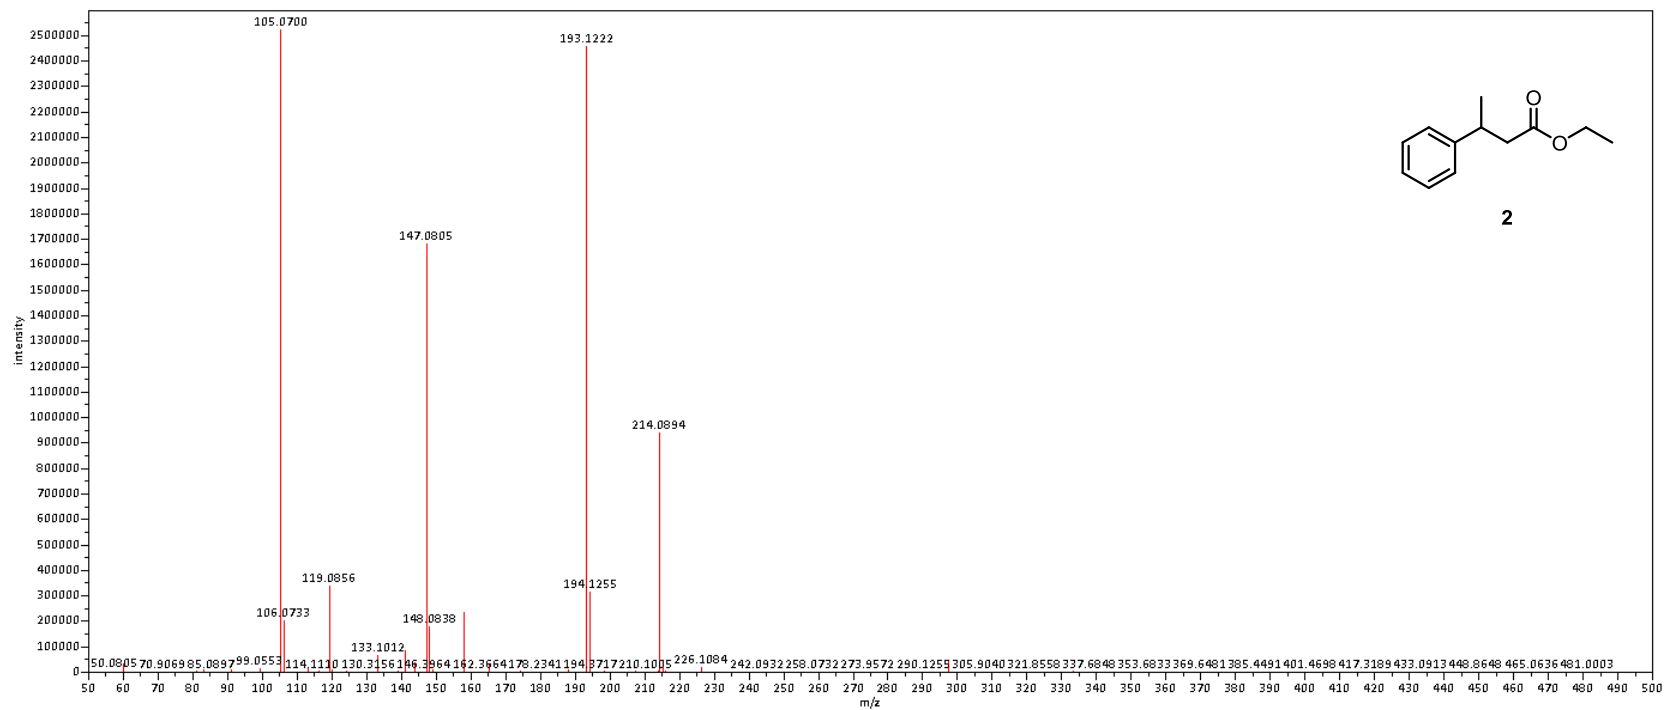

Ethyl 3-(naphthalen-2-yl)butanoate (9a)

<sup>1</sup>H  
NMR

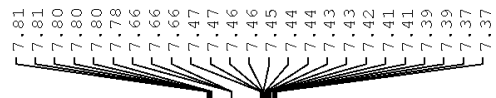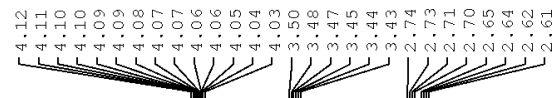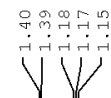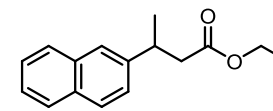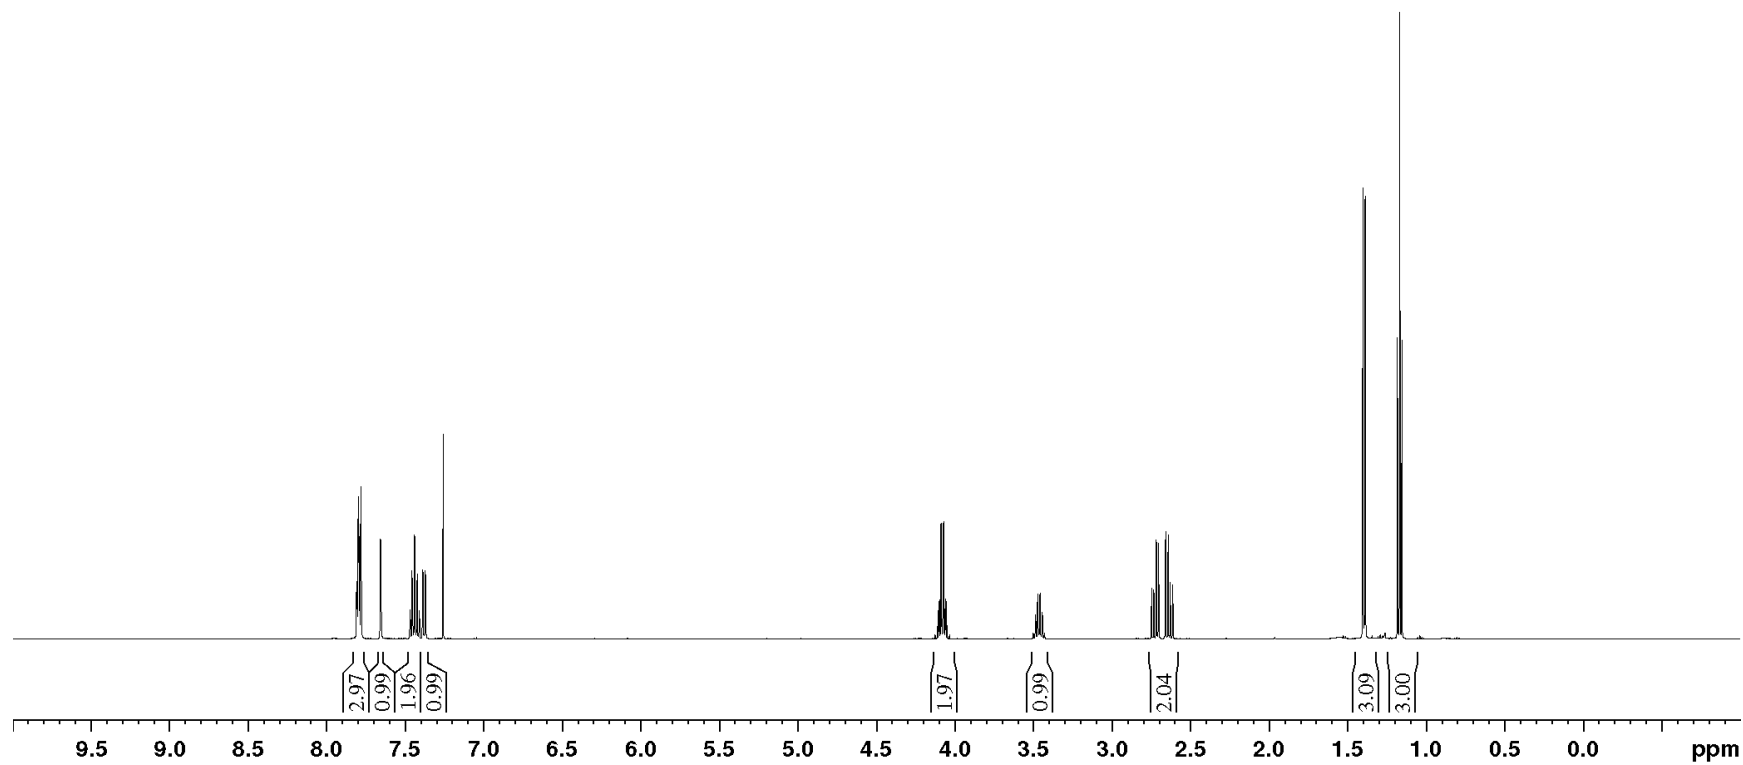

$^{13}\text{C}$  NMR

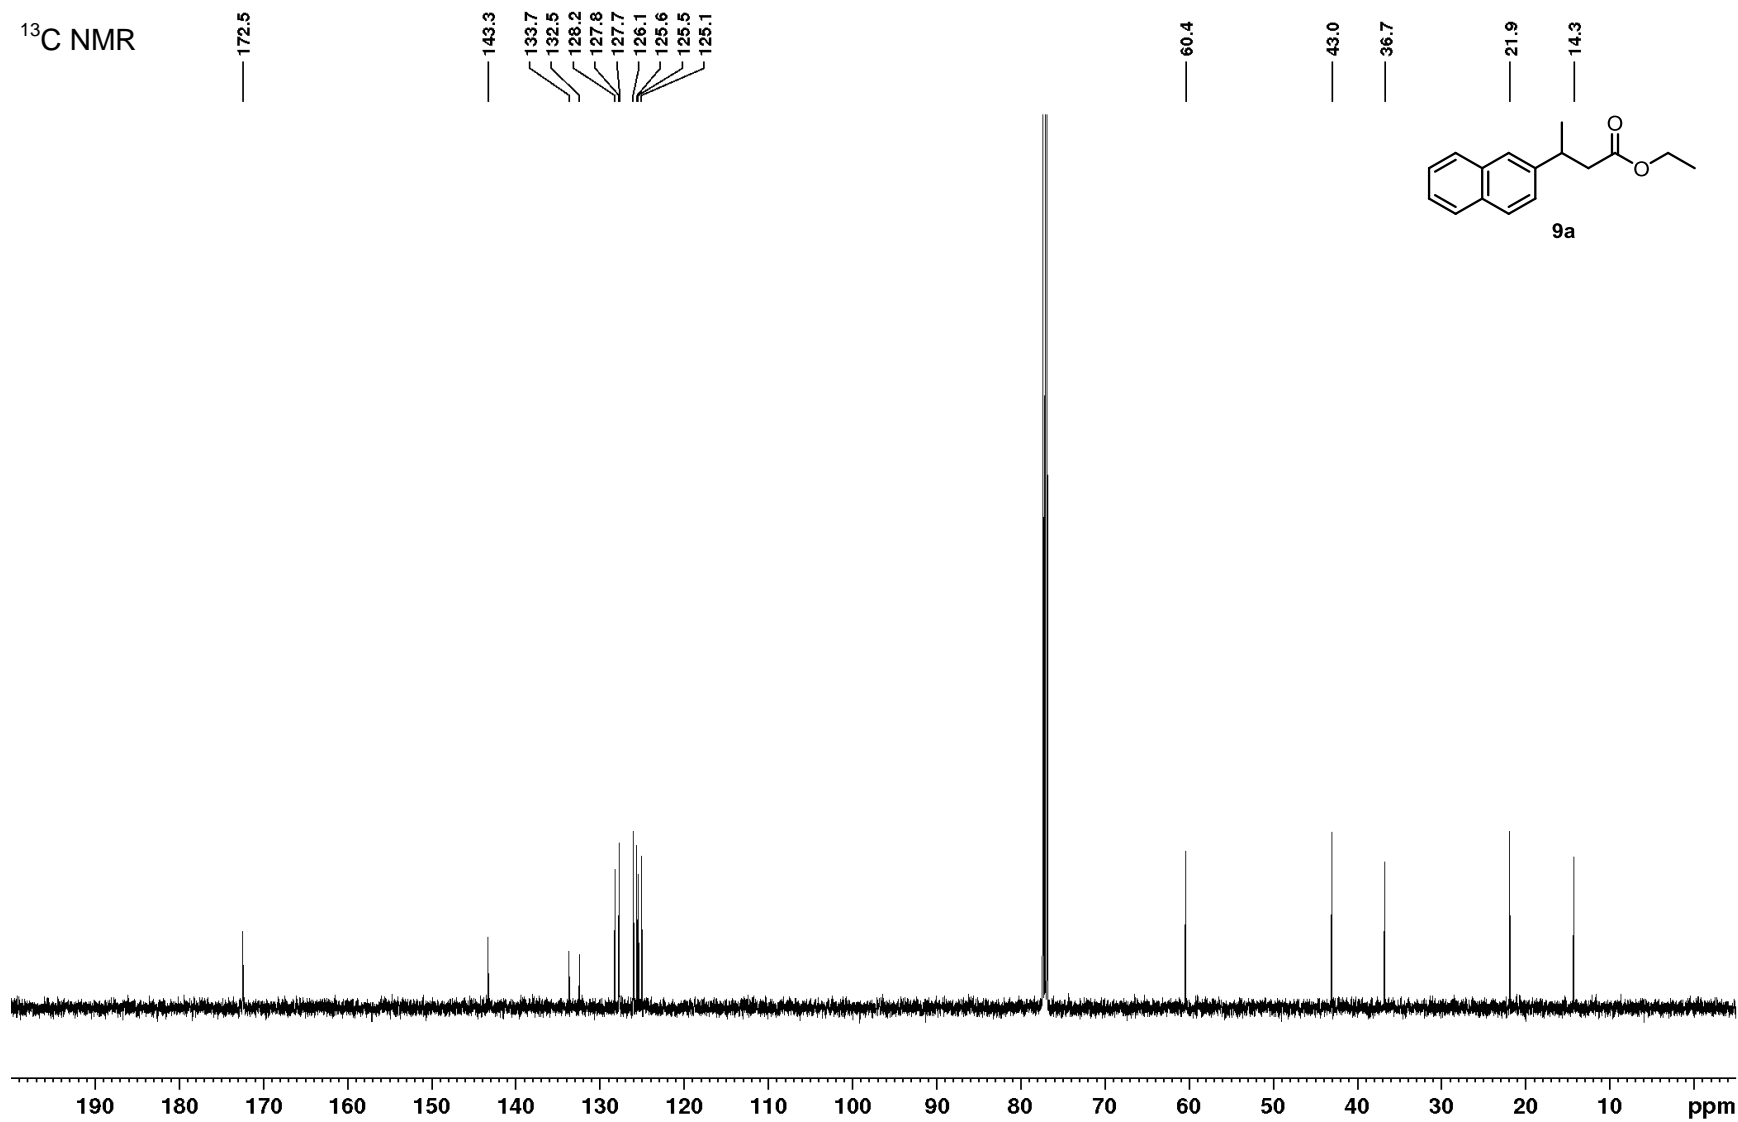

$^{13}\text{C}$  DEPT NMR

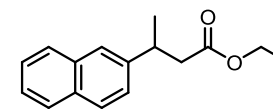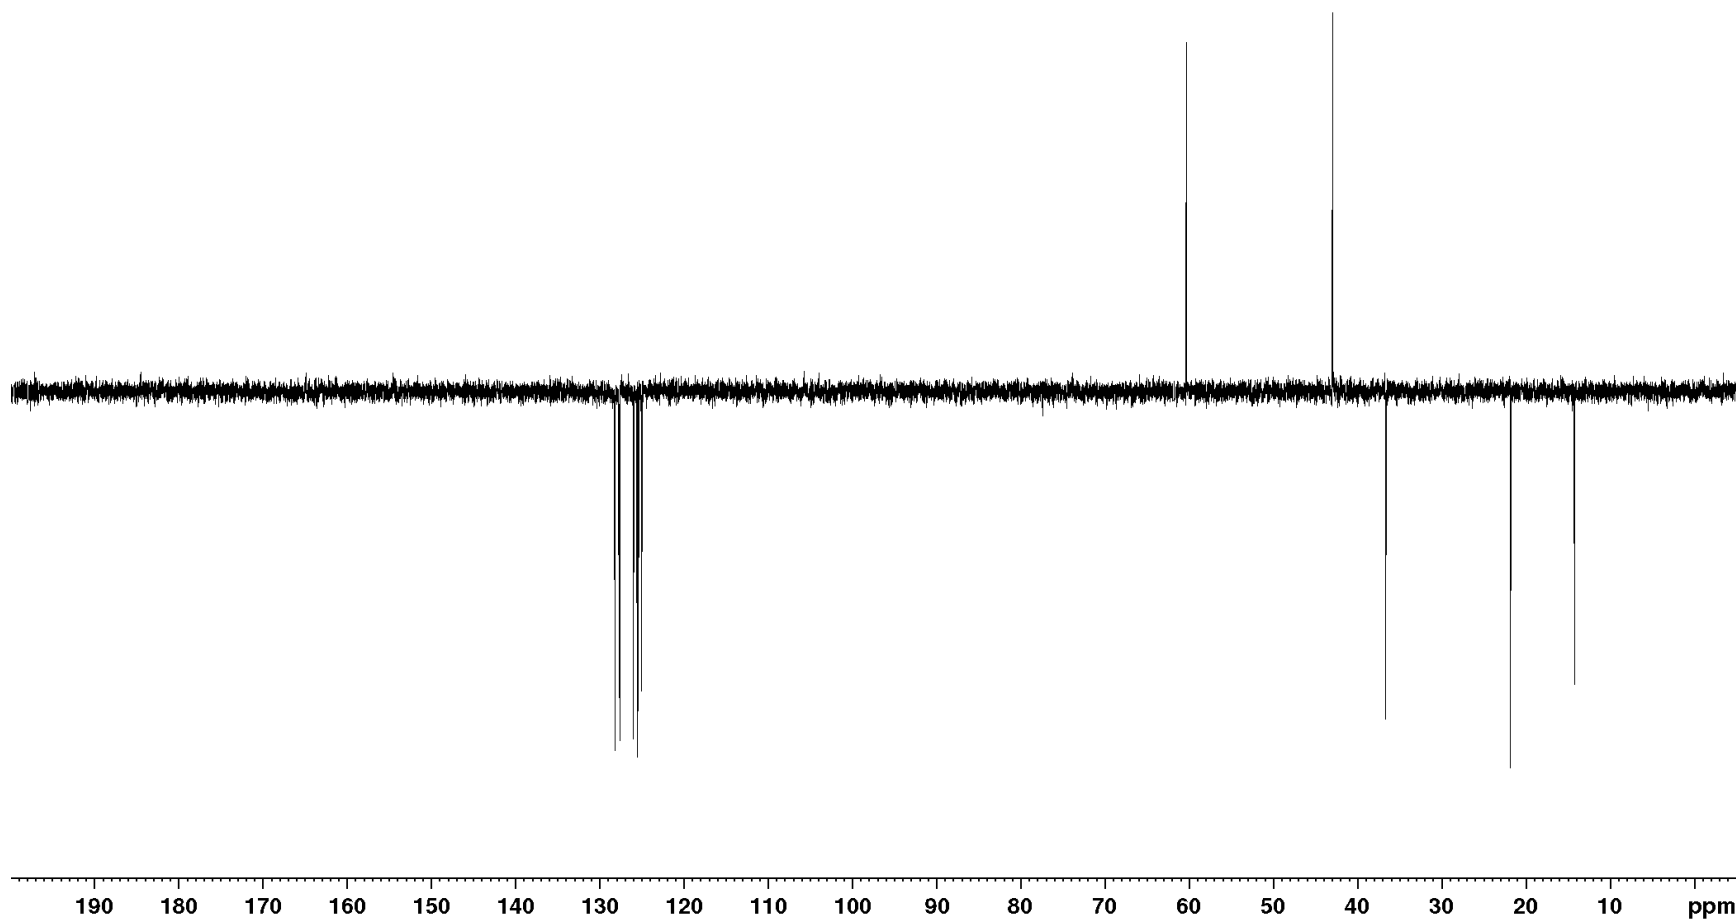

$^1\text{H}$ - $^1\text{H}$  COSY

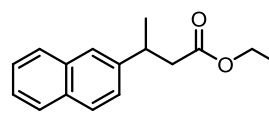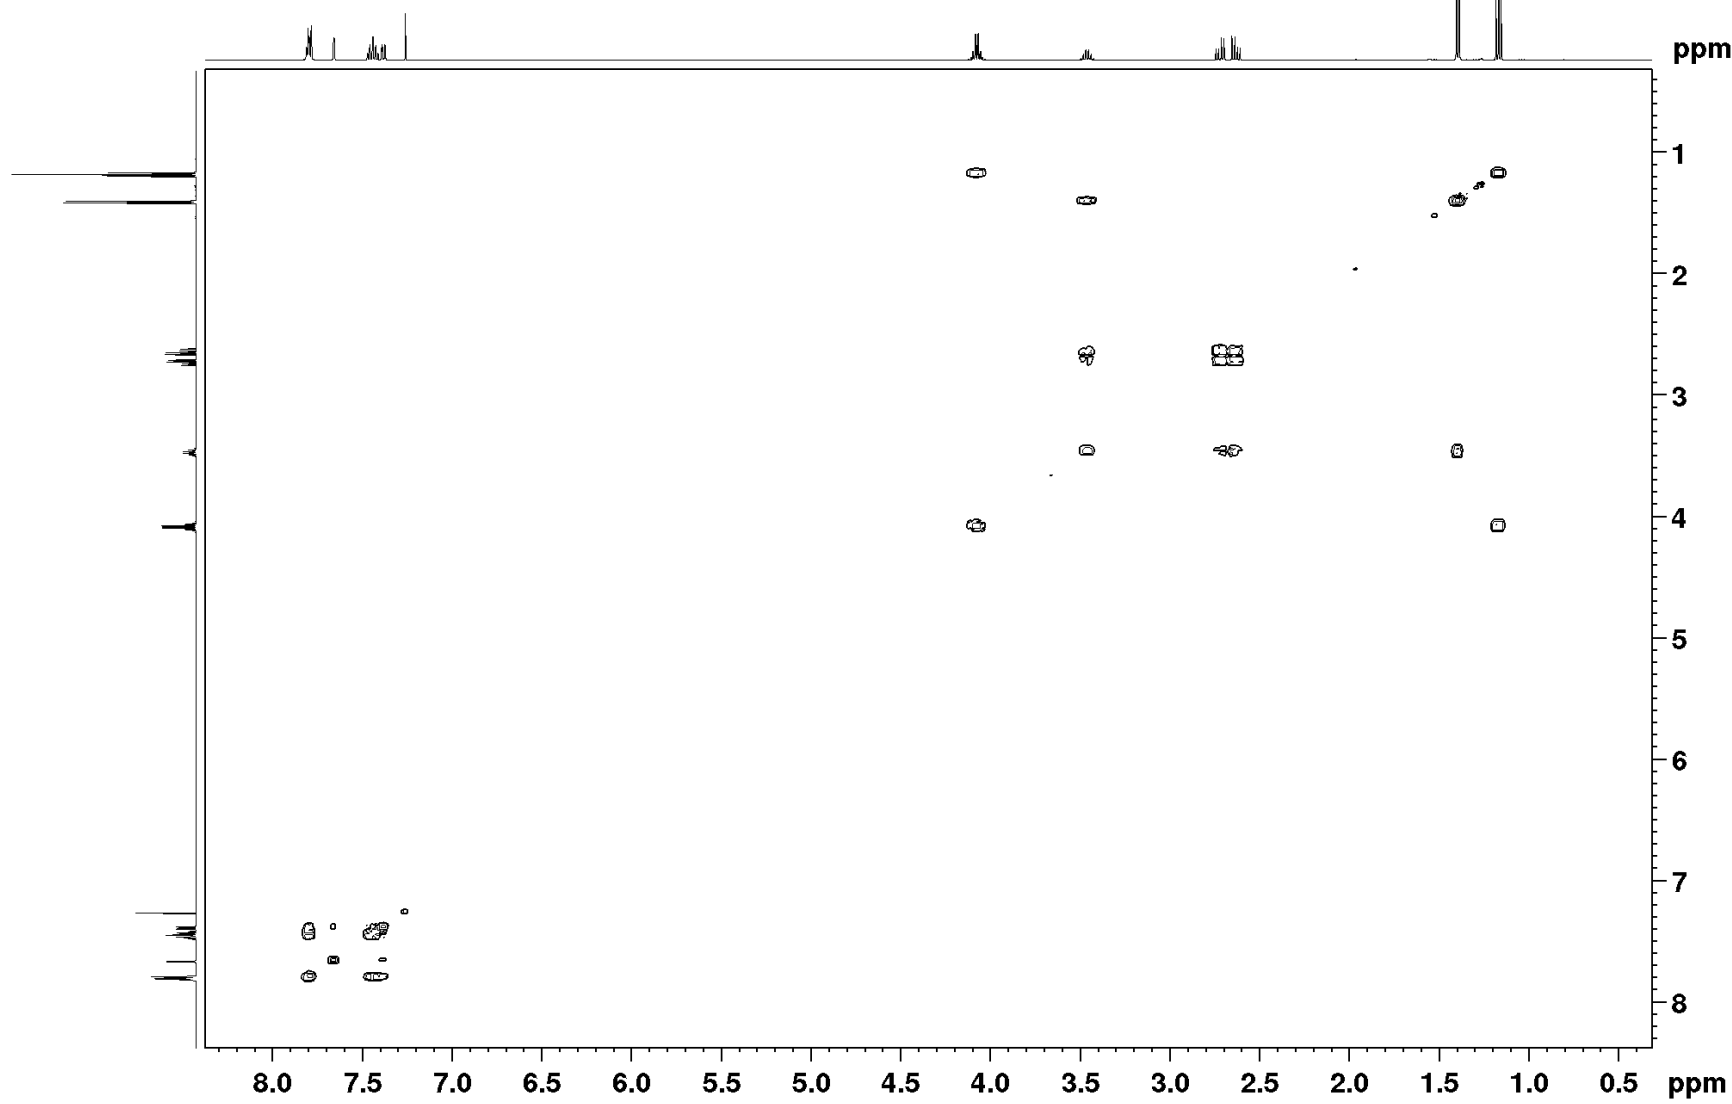



$^1\text{H}$ - $^{13}\text{C}$  HMQC

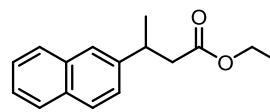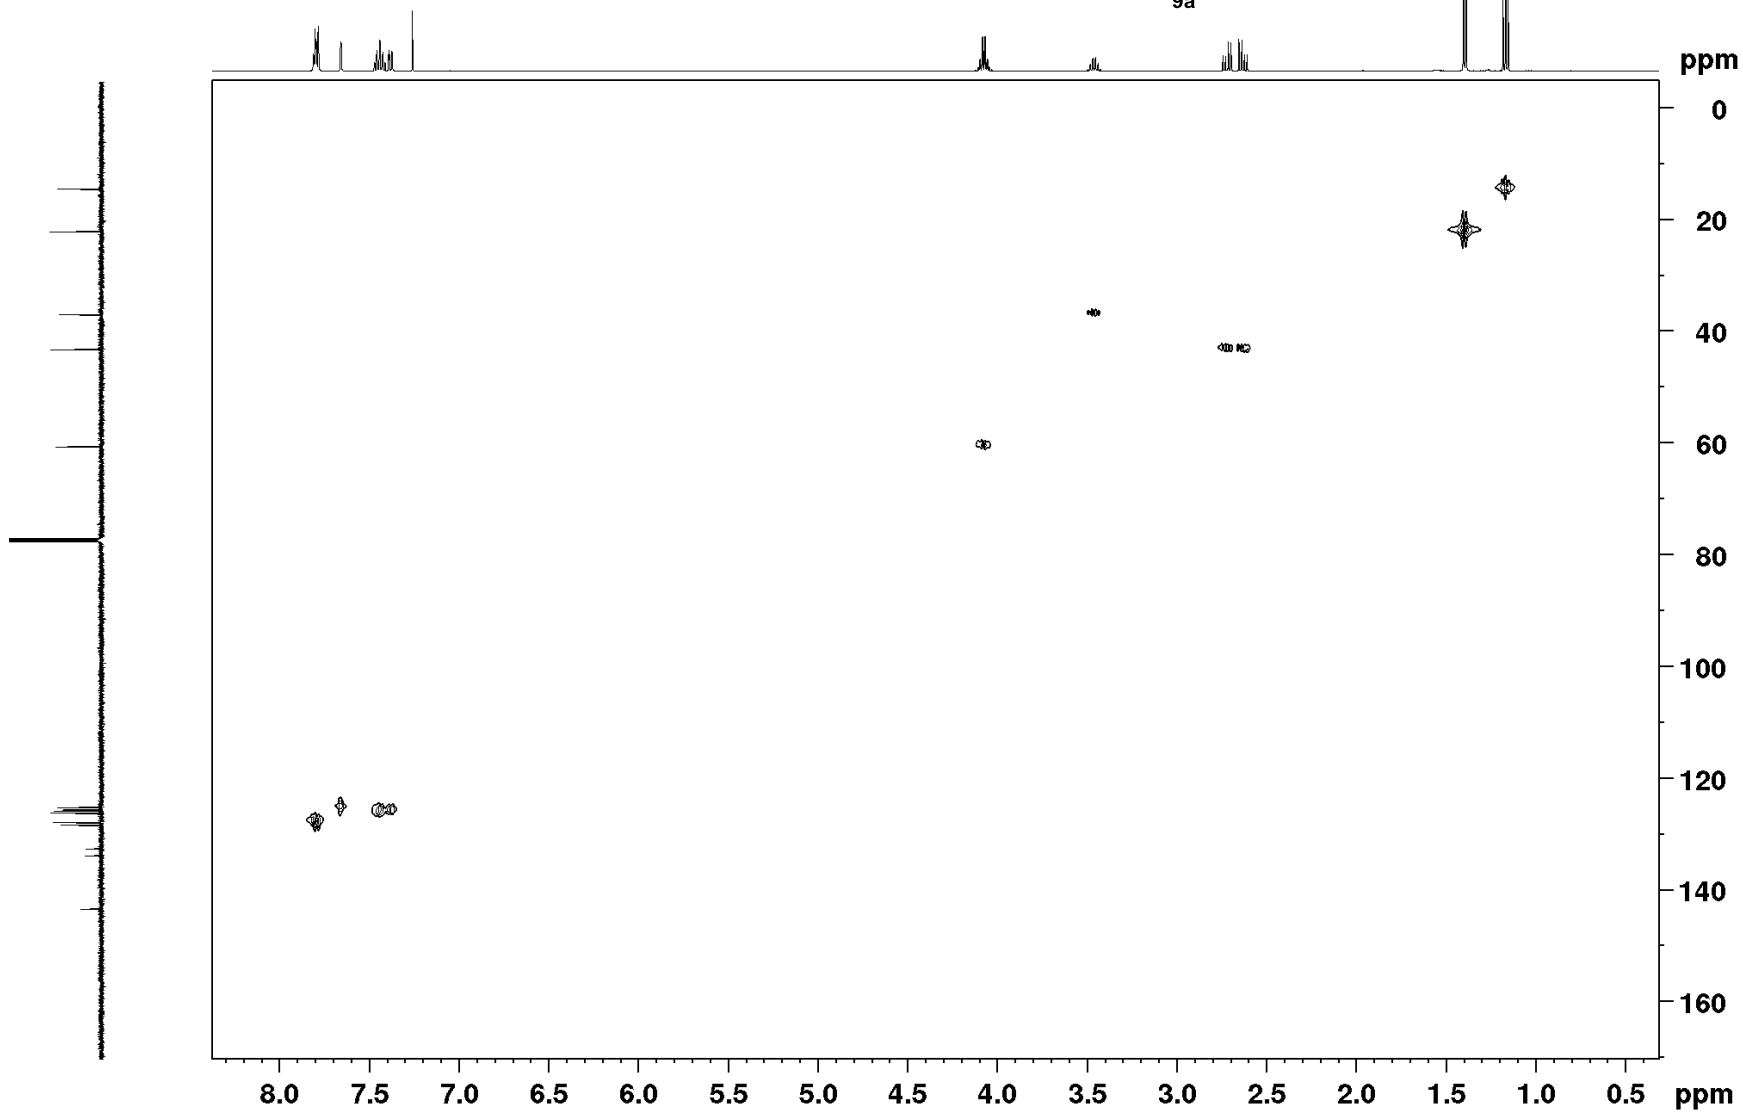

$^1\text{H}$ - $^{13}\text{C}$  HMBC

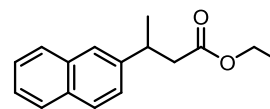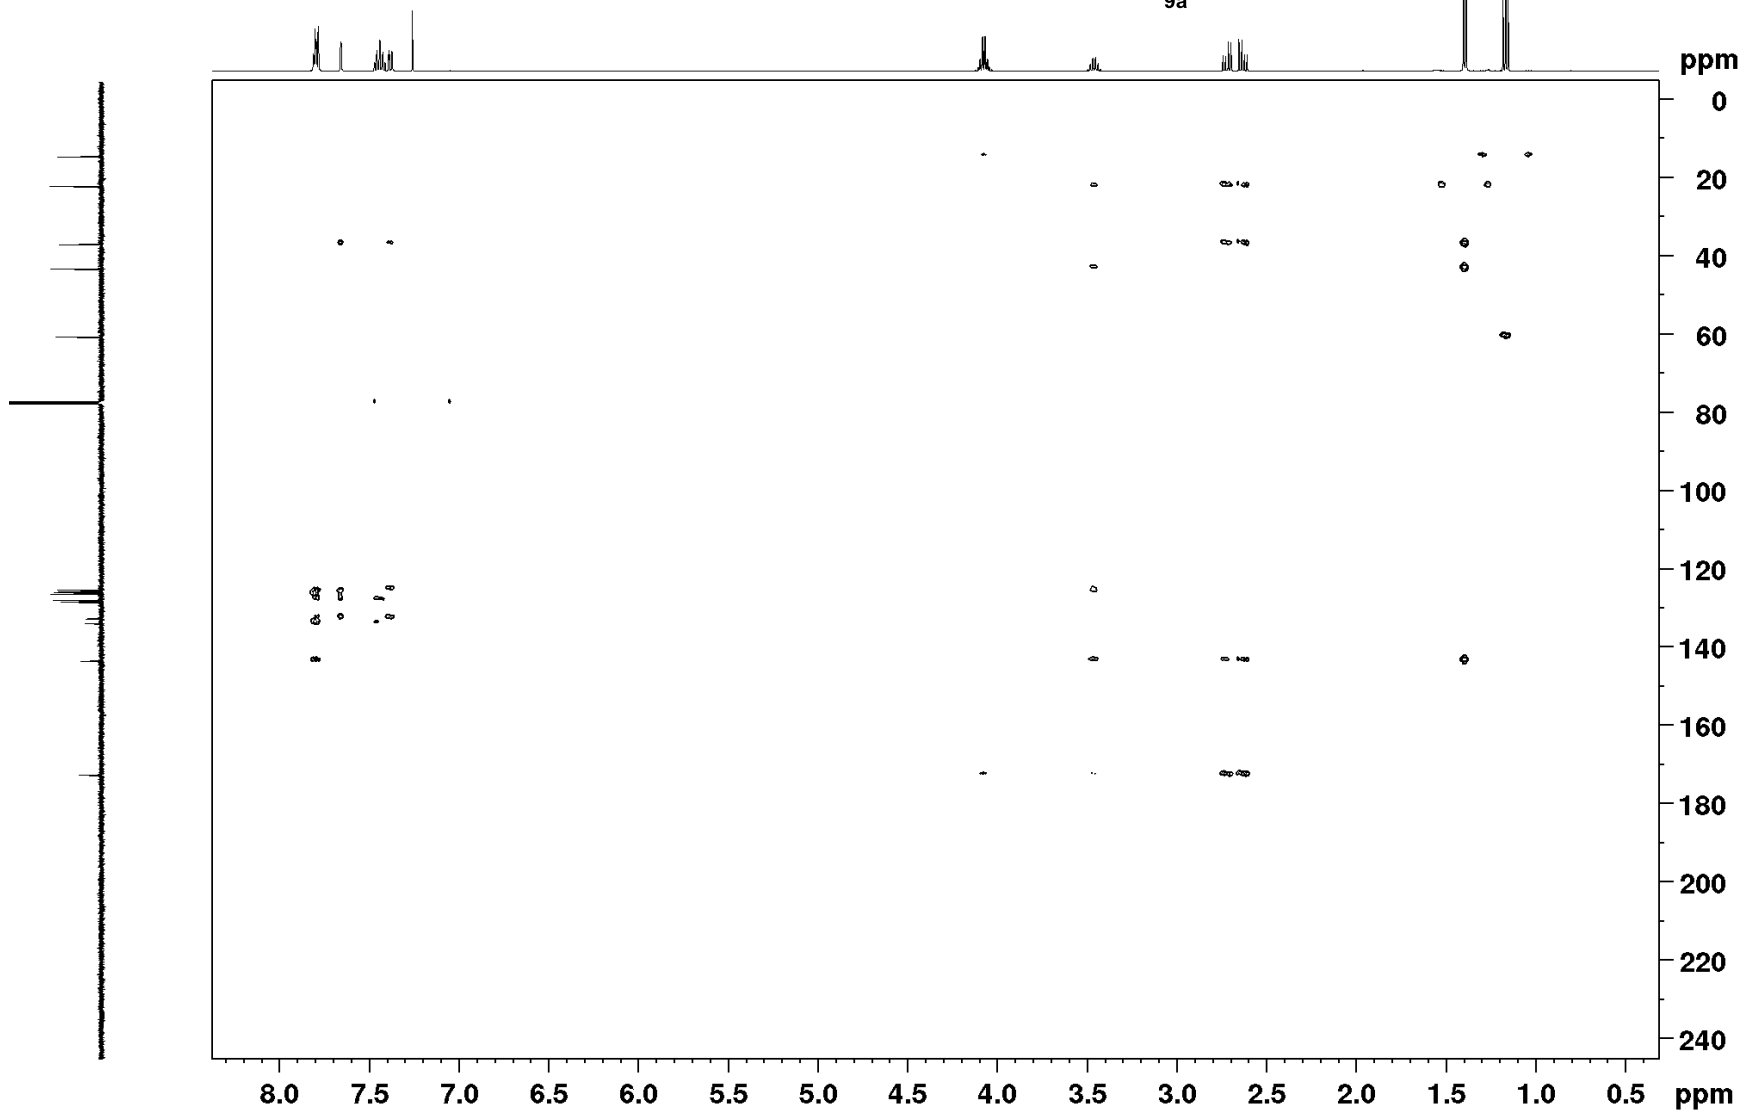

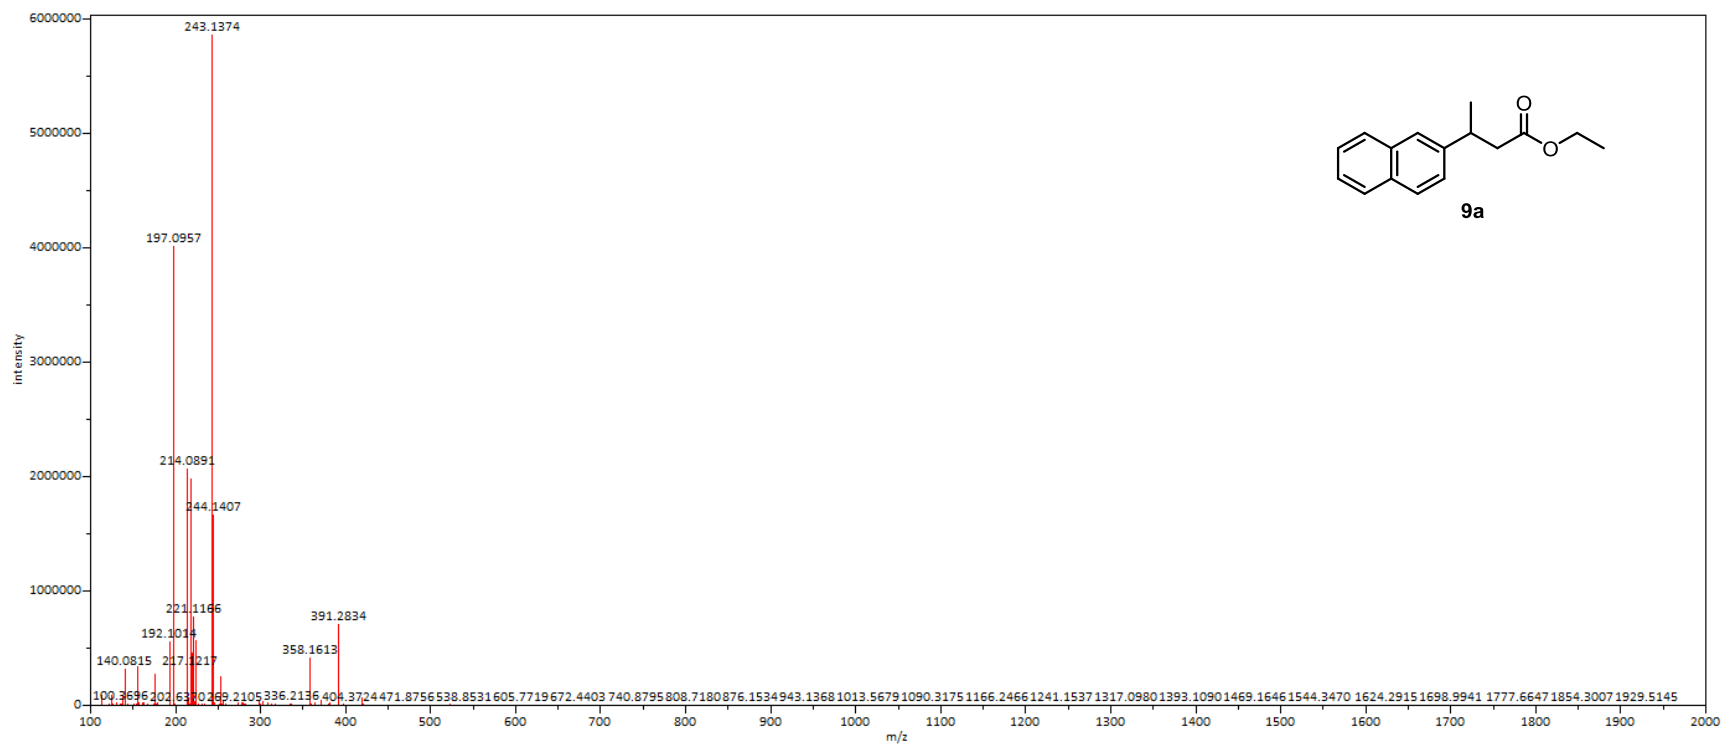

**tert-Butyl 3-phenylbutanoate (9b)**

<sup>1</sup>H NMR

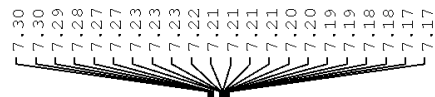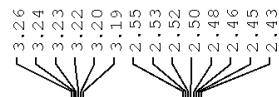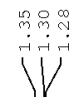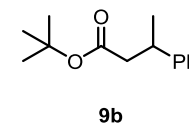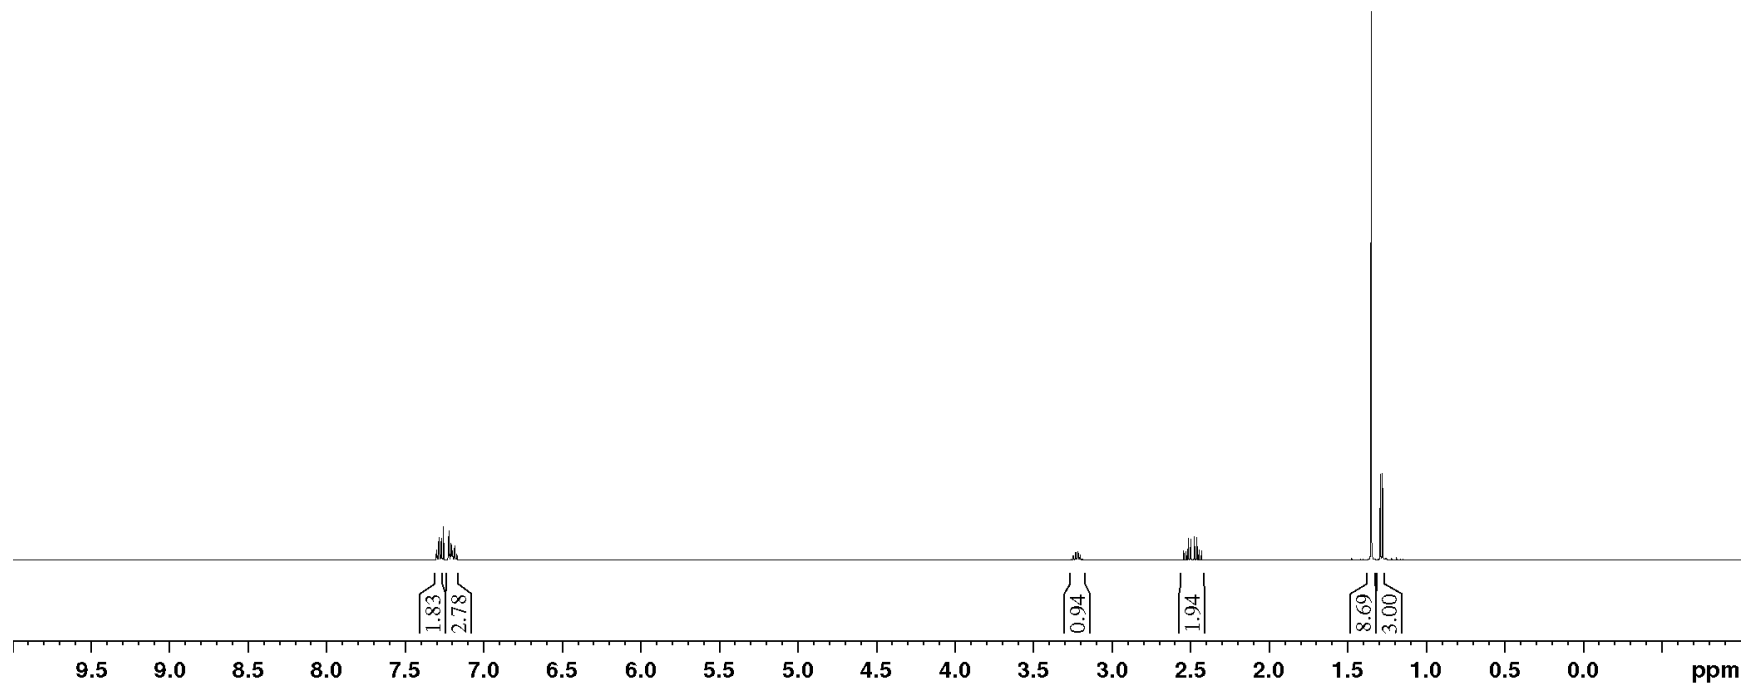

<sup>13</sup>C NMR

171.9

146.0

128.5

127.0

126.4

80.3

44.3

36.9

28.1

22.0

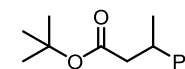

9b

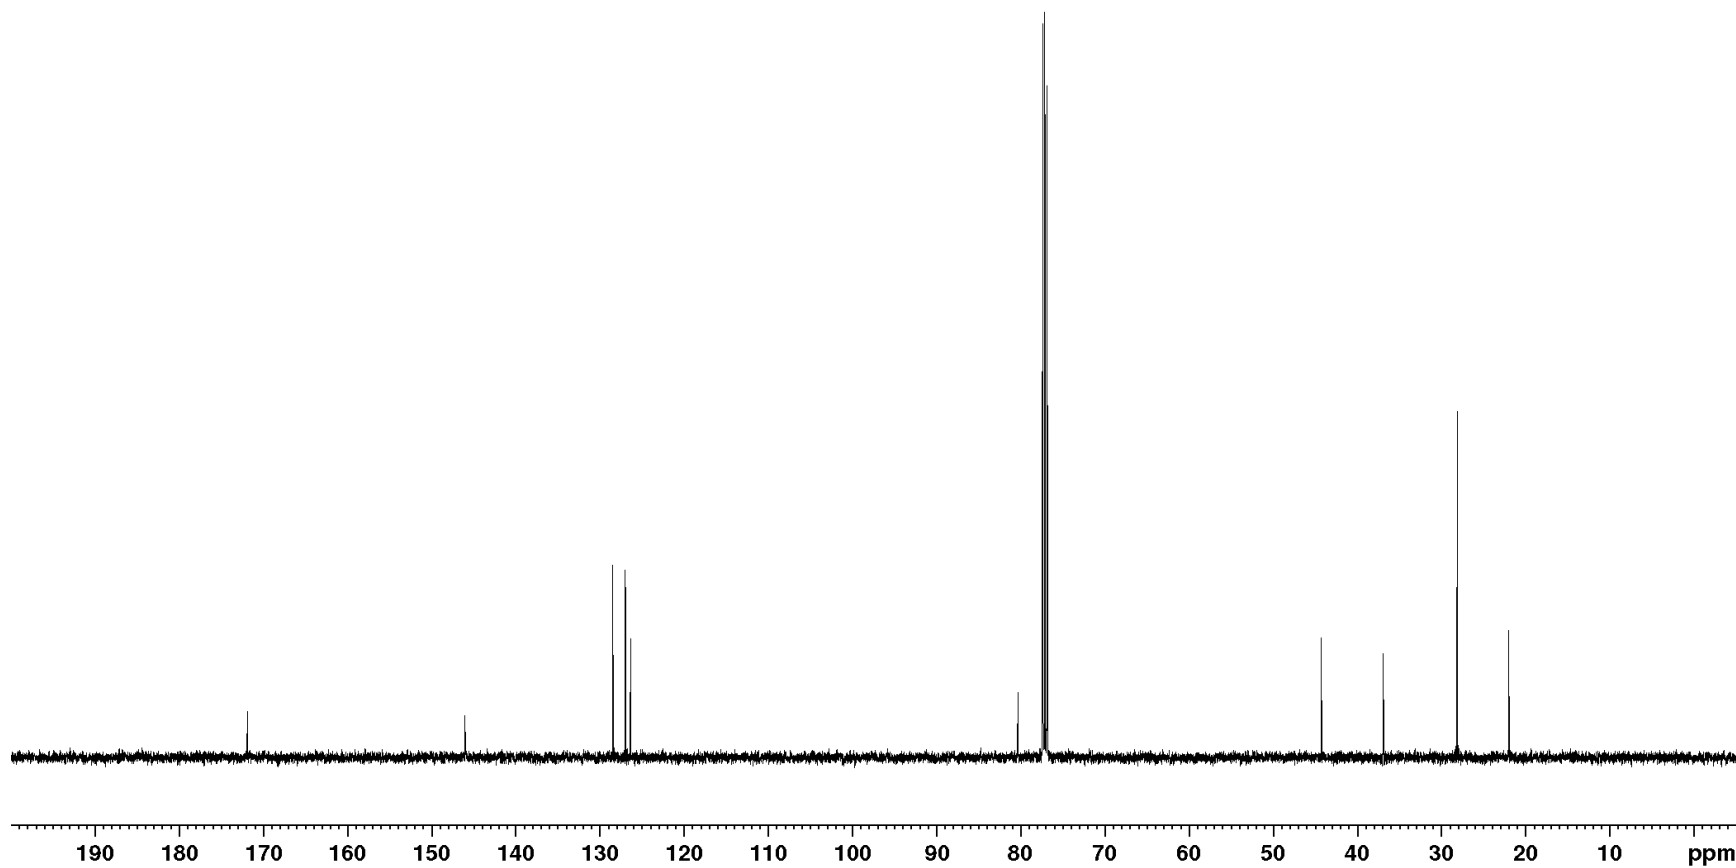

<sup>13</sup>C DEPT NMR

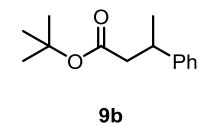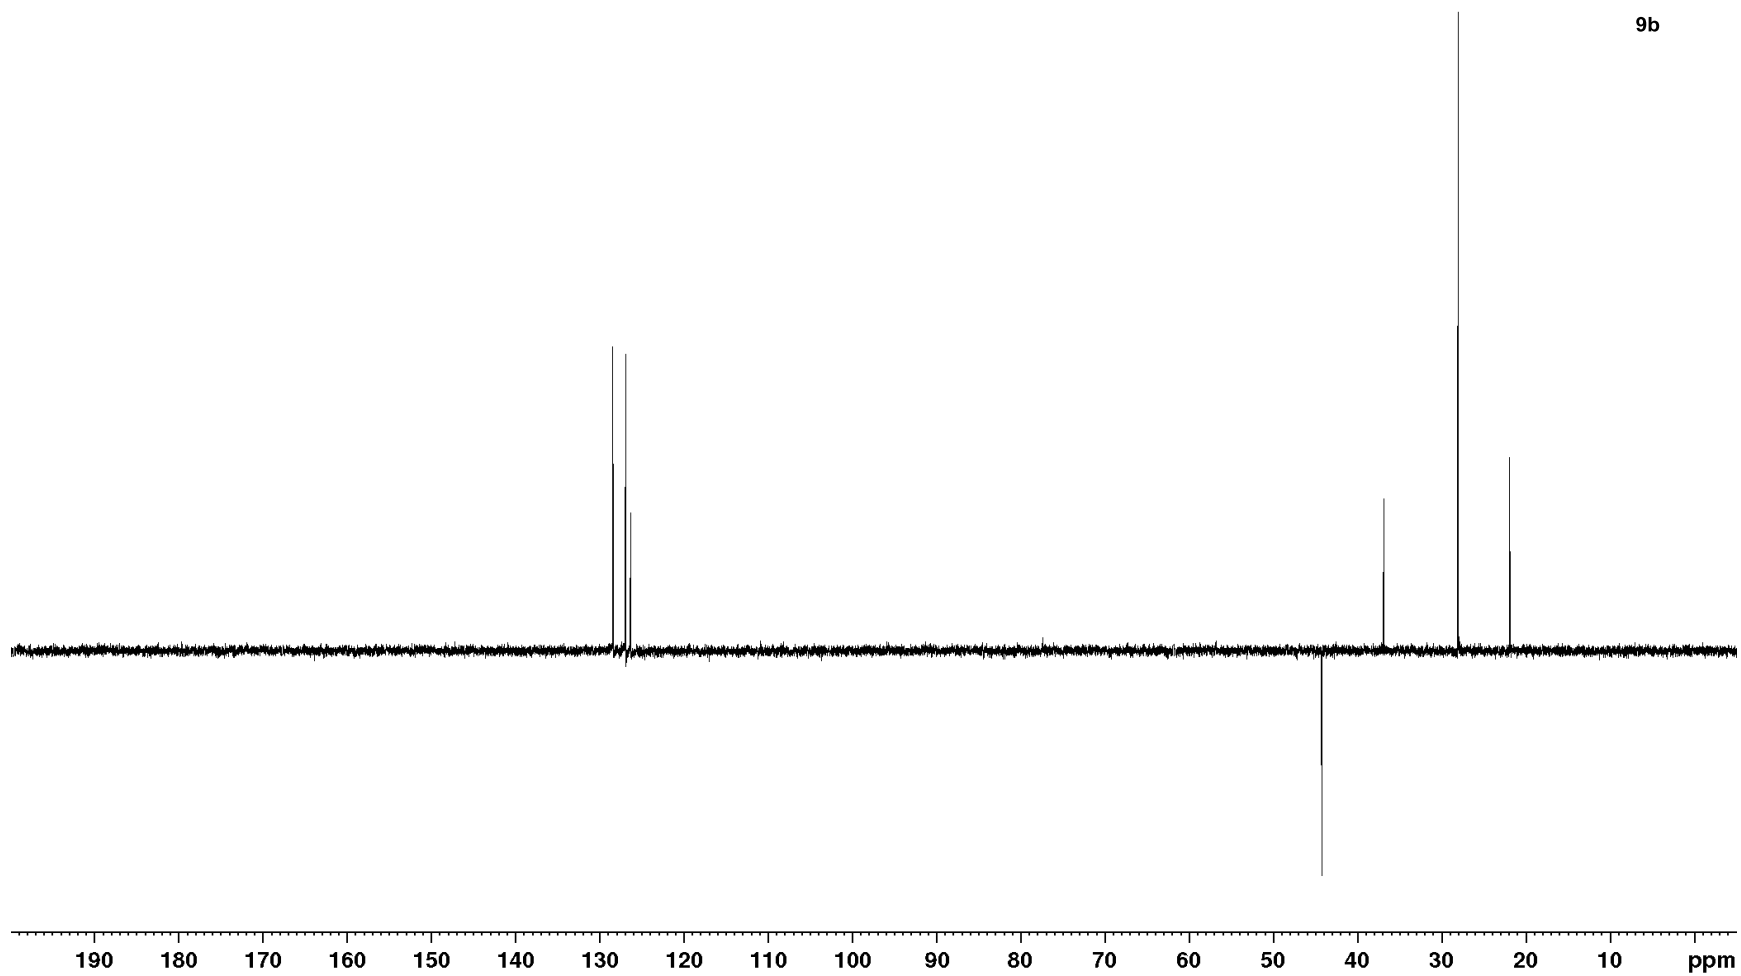

$^1\text{H}$ - $^1\text{H}$  COSY

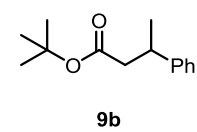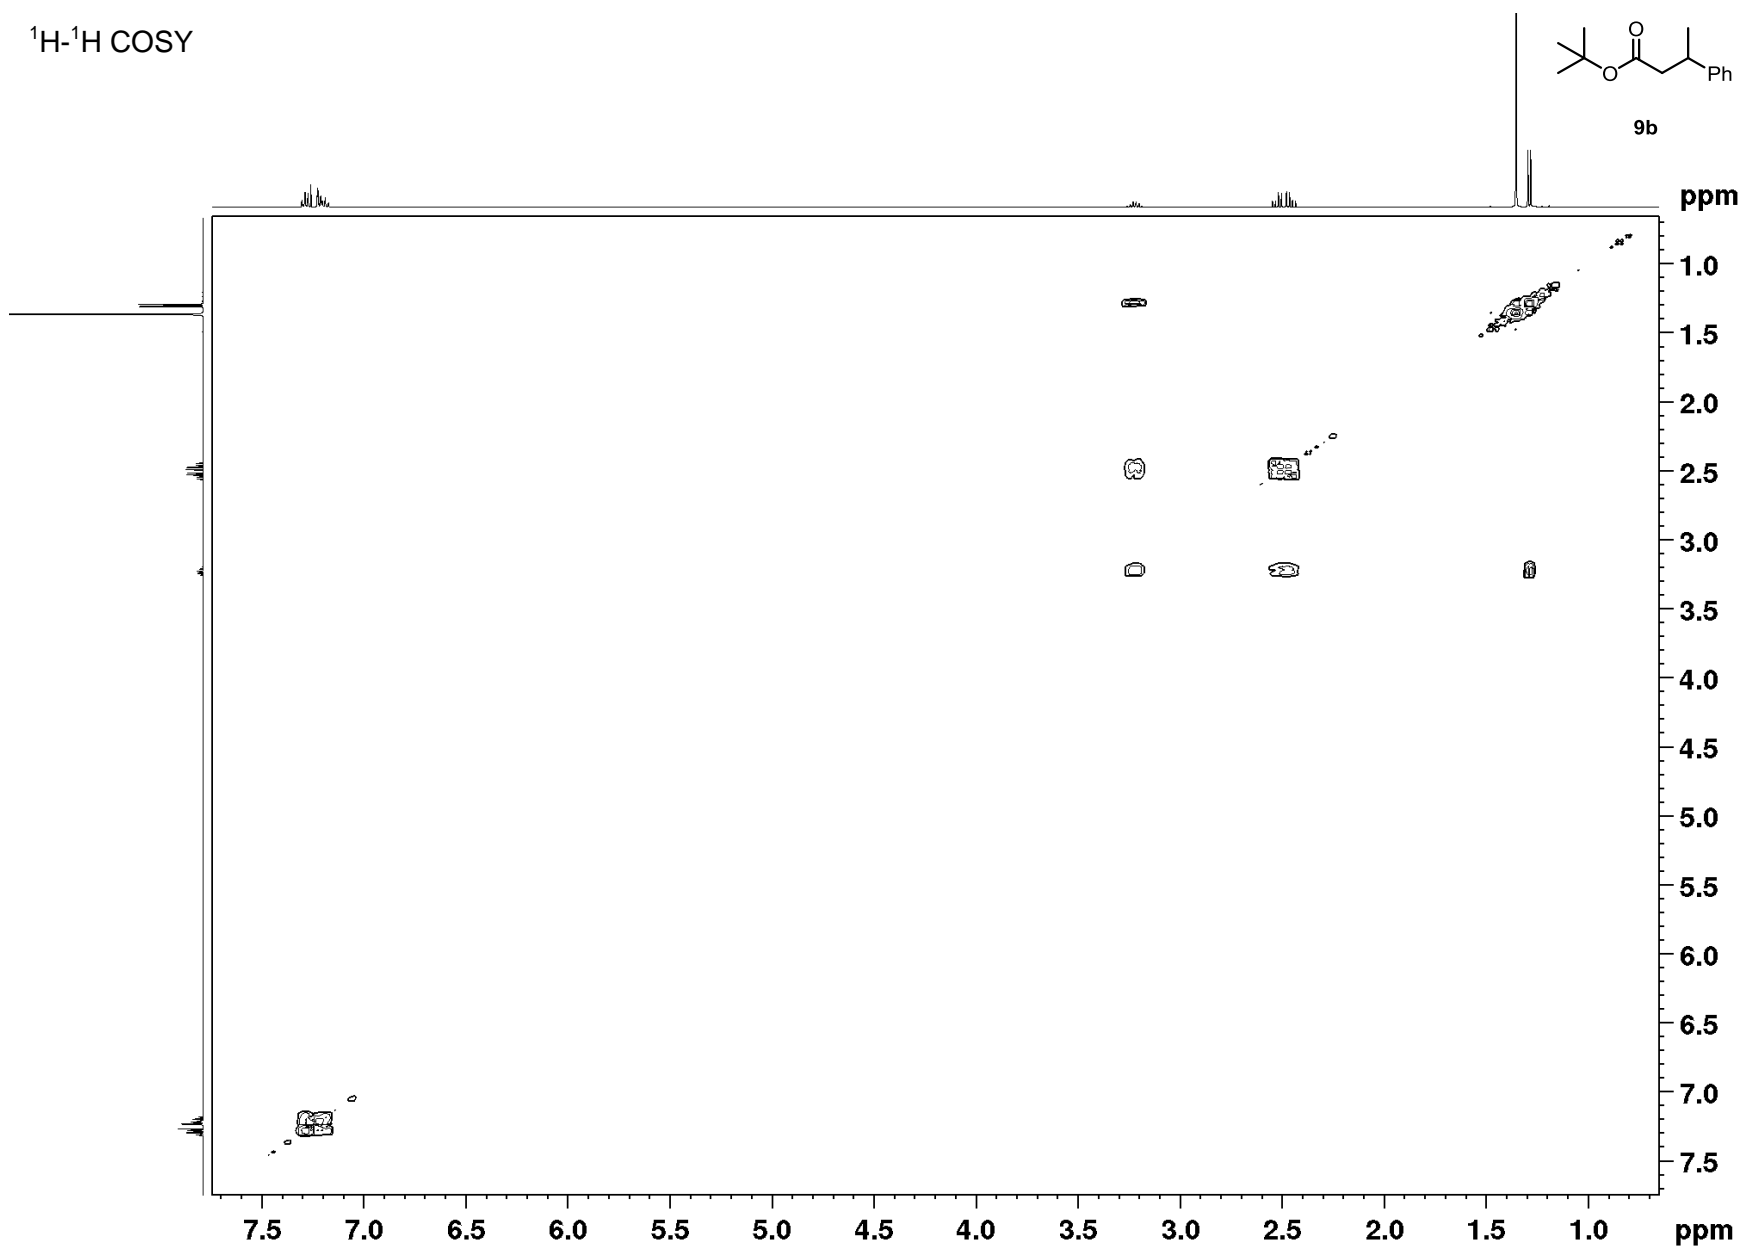

$^1\text{H}$ - $^{13}\text{C}$  HMQC

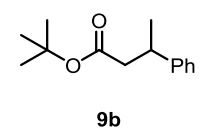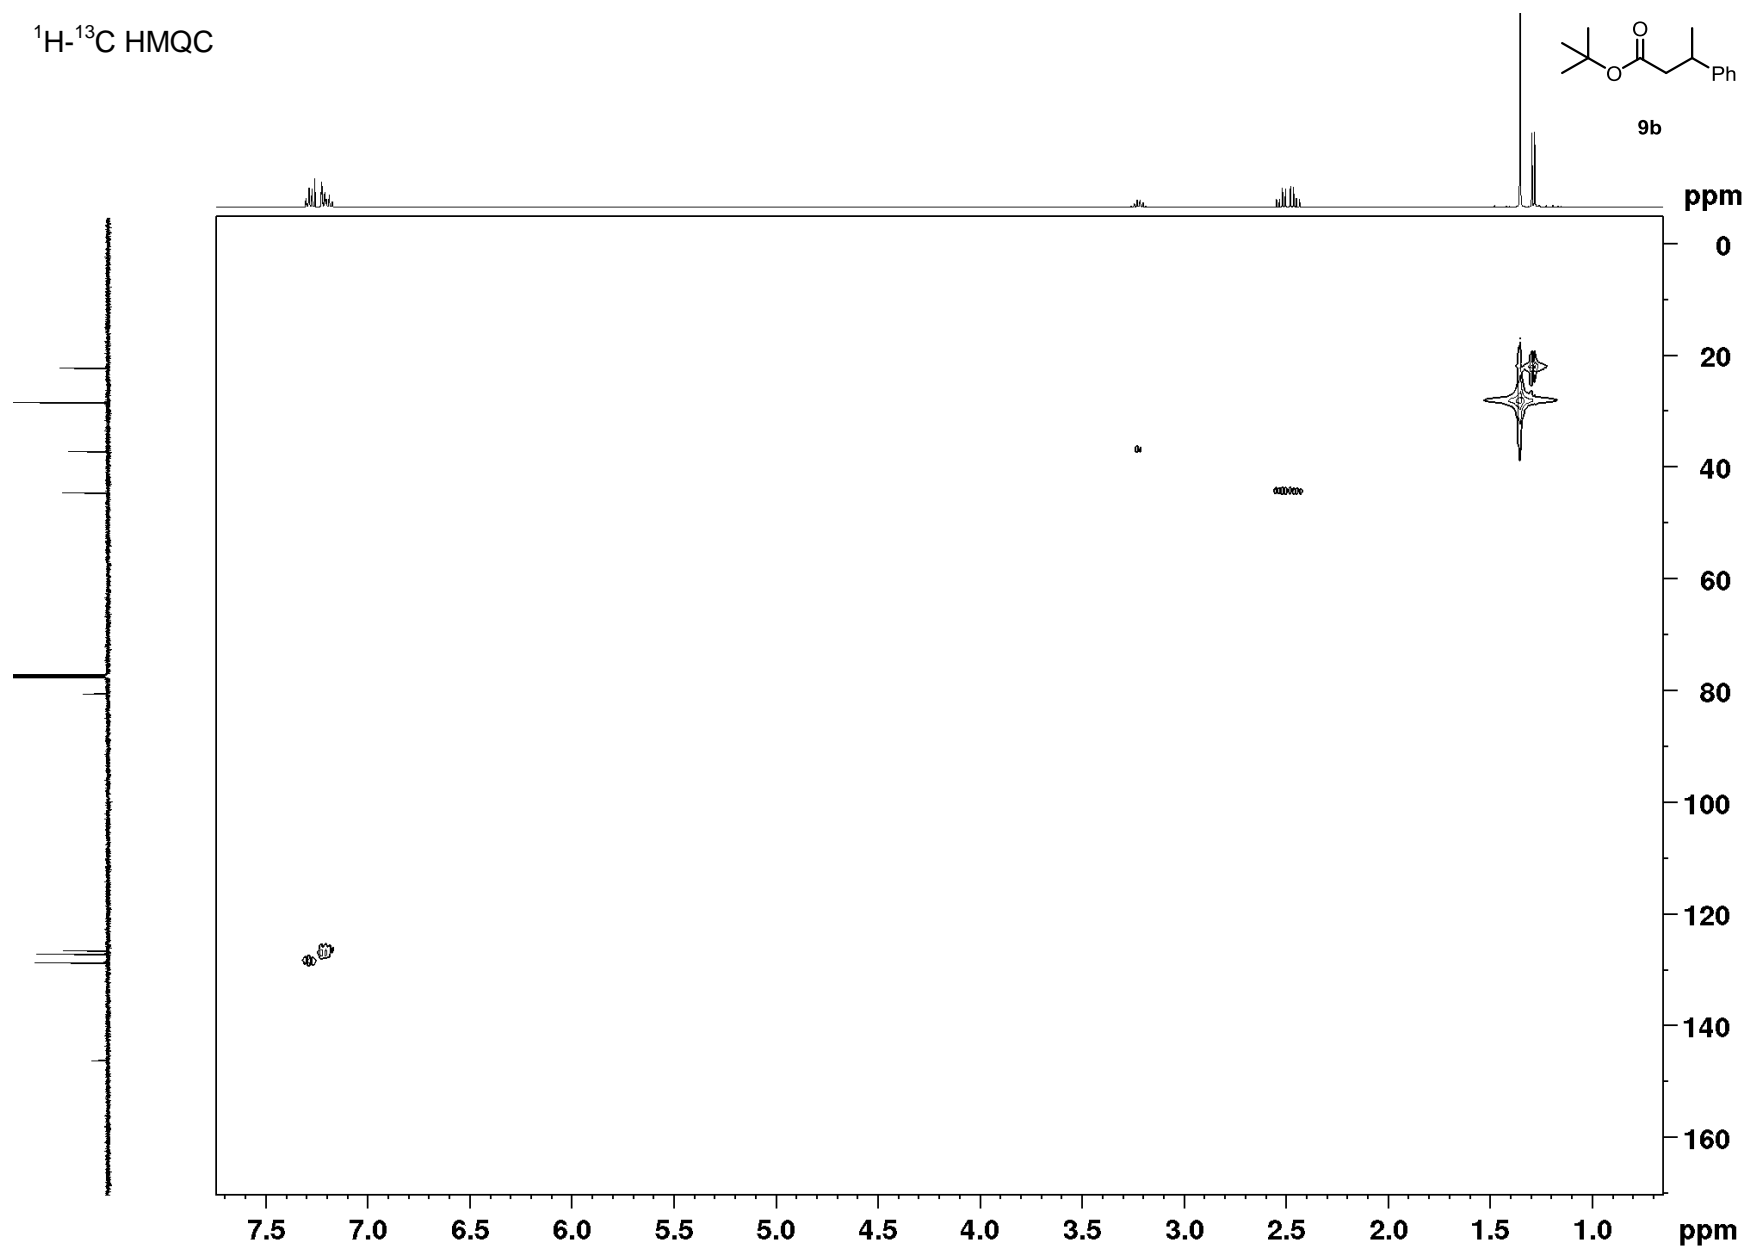



$^1\text{H}$ - $^{13}\text{C}$  HMBC

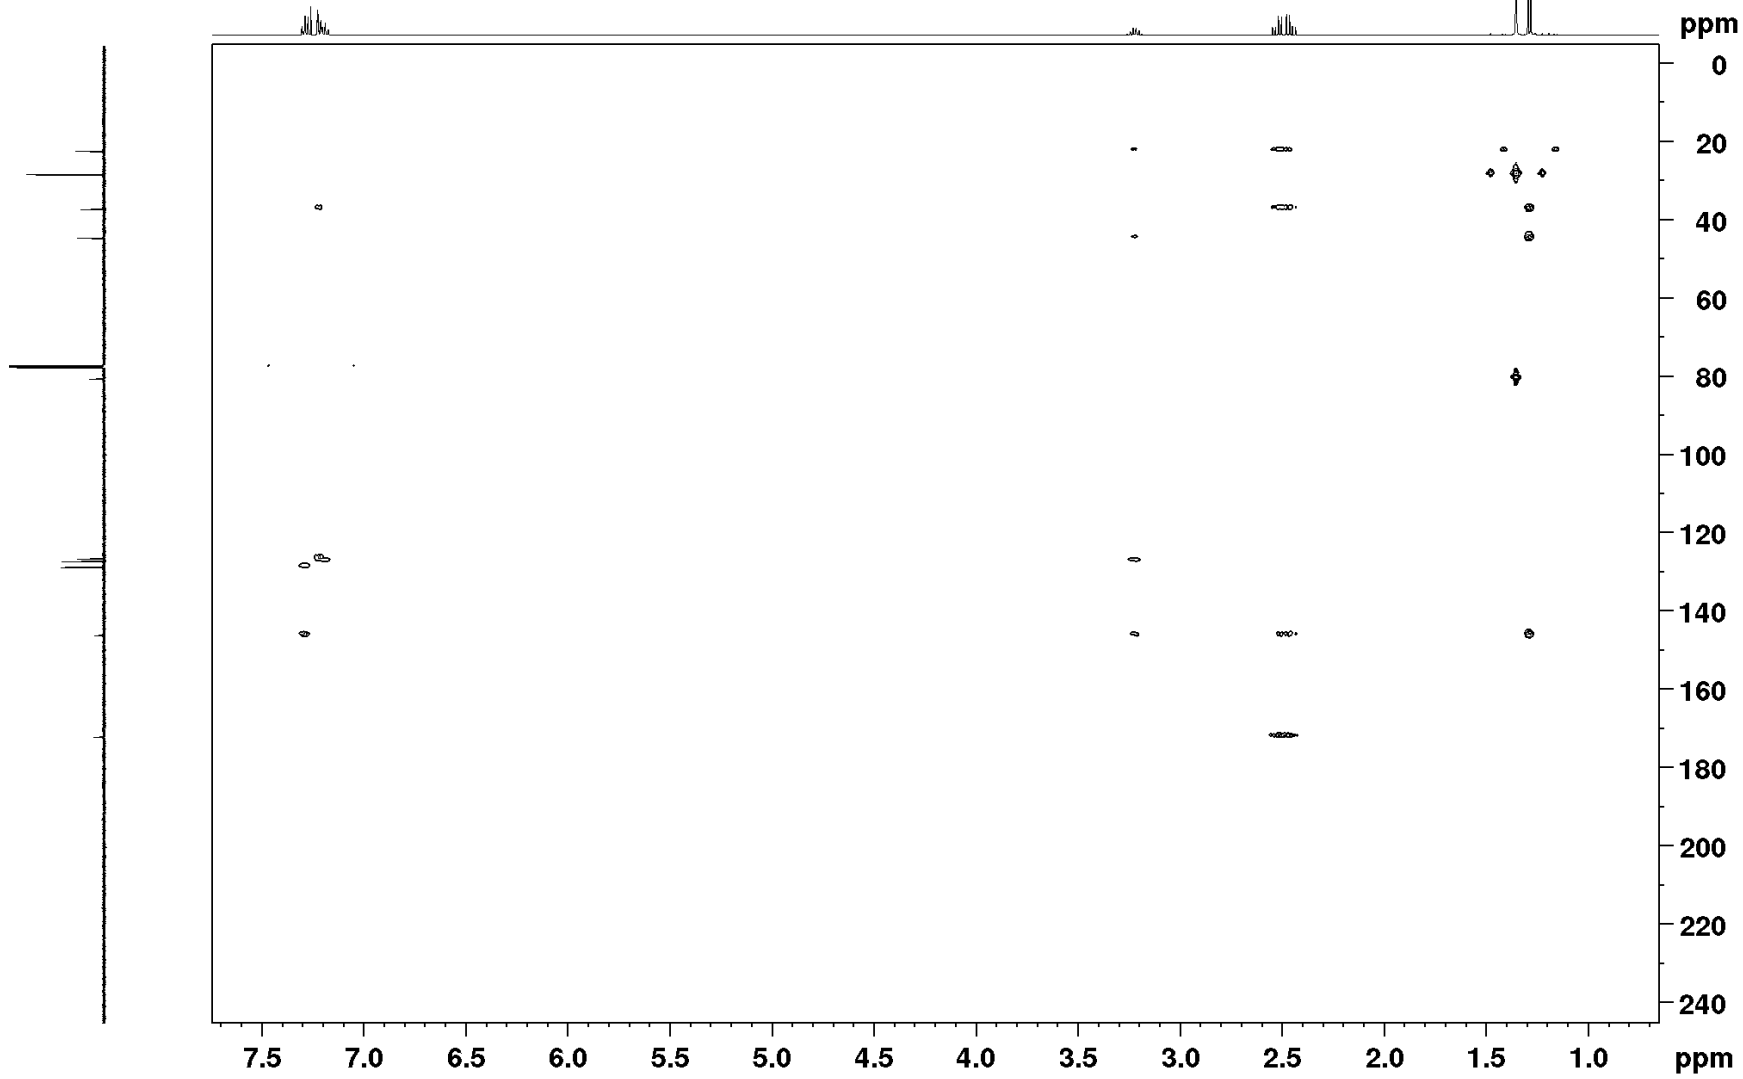

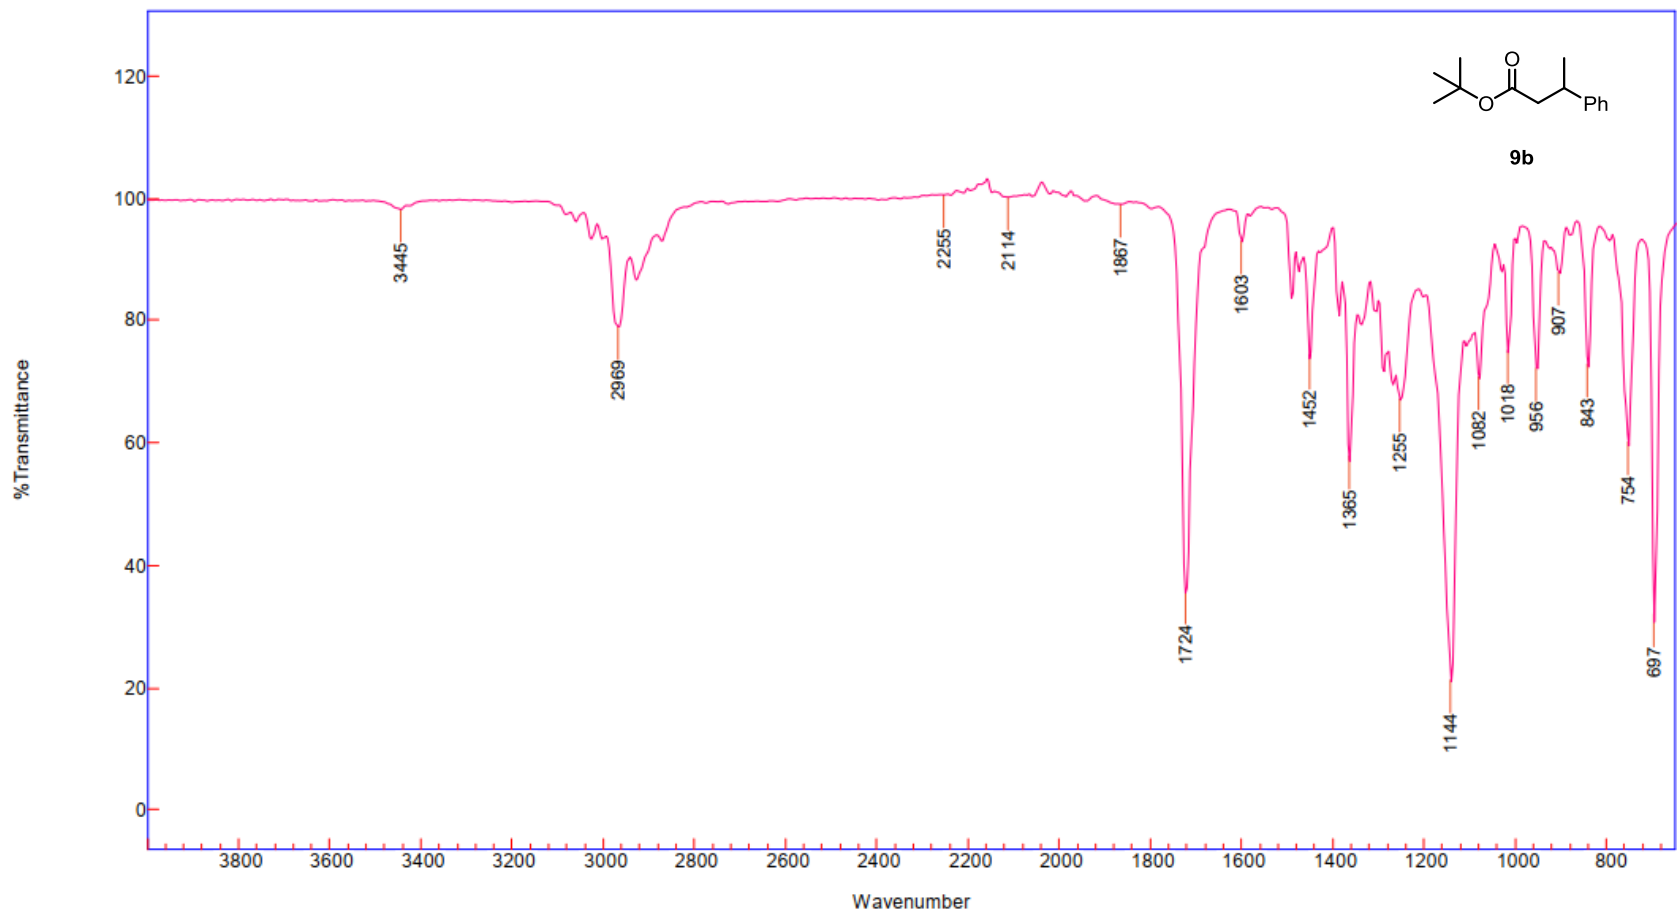

**Ethyl 3,3-diphenylpropanoate (9c)**

<sup>1</sup>H NMR

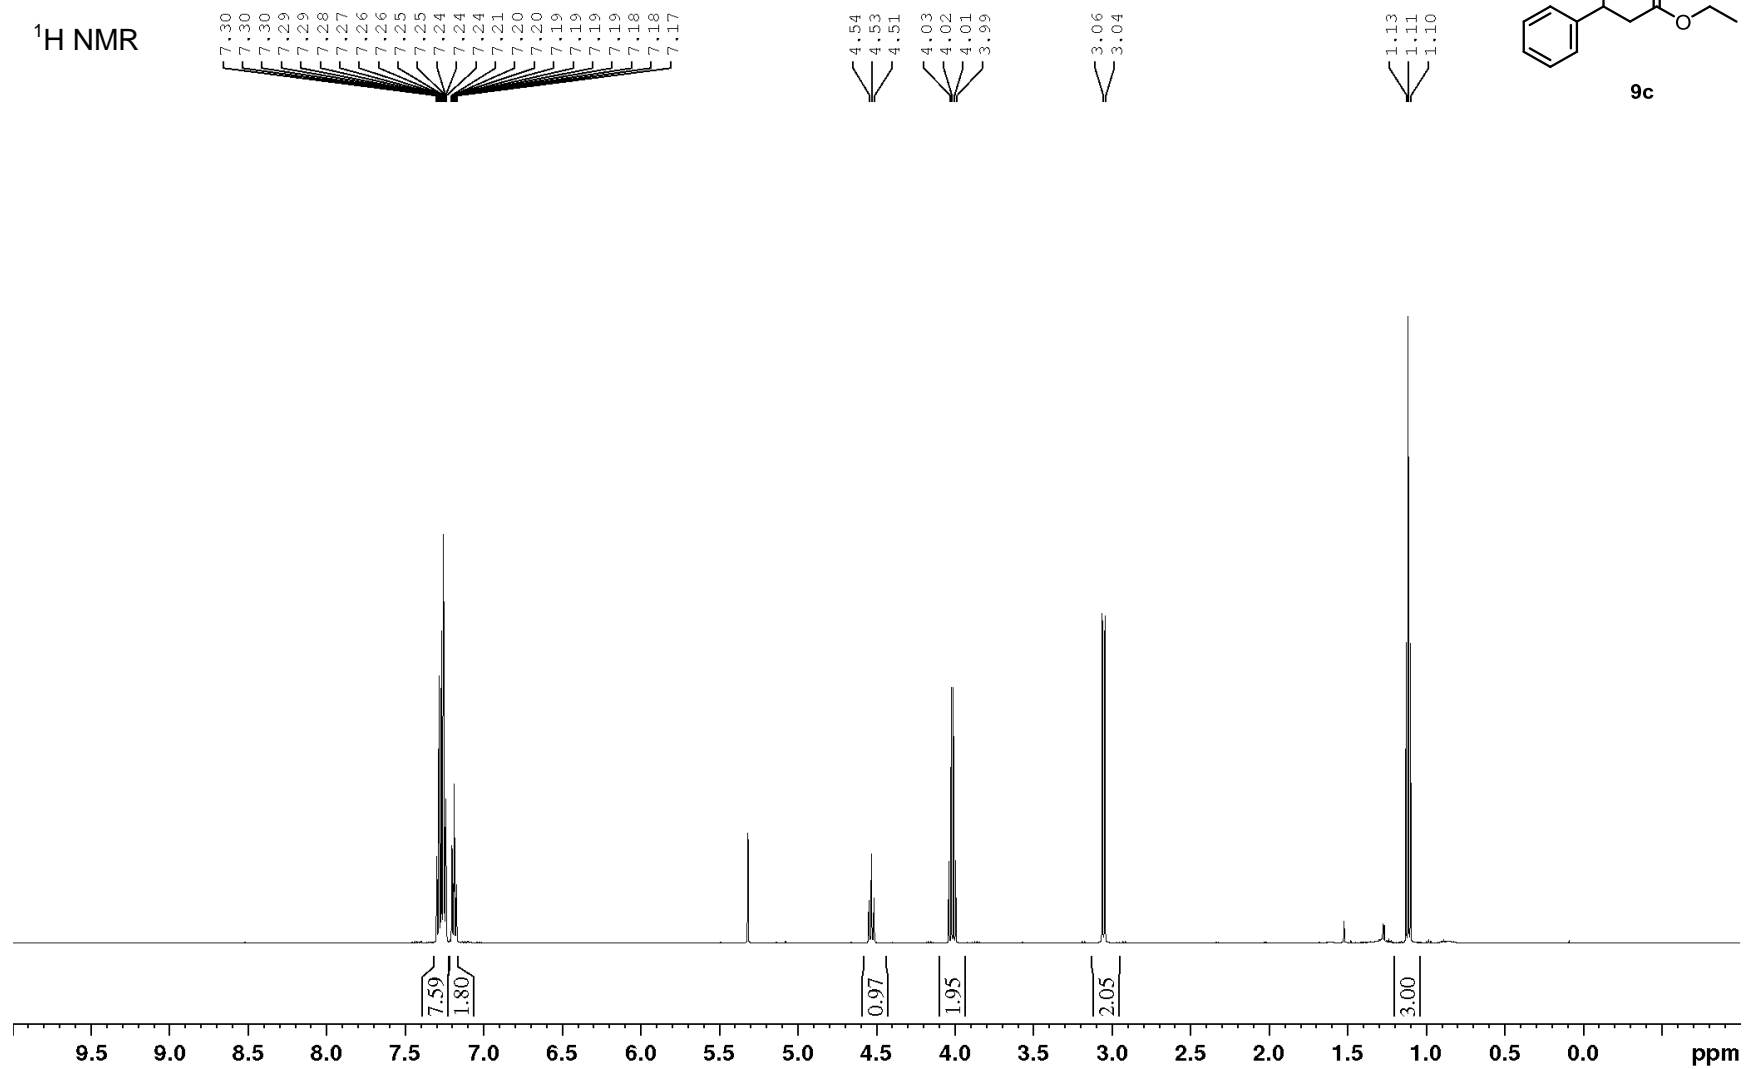

<sup>13</sup>C NMR

171.9

144.2

128.9

128.0

128.0

126.9

60.7

47.5

40.9

14.3

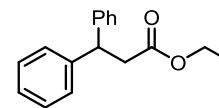

9c

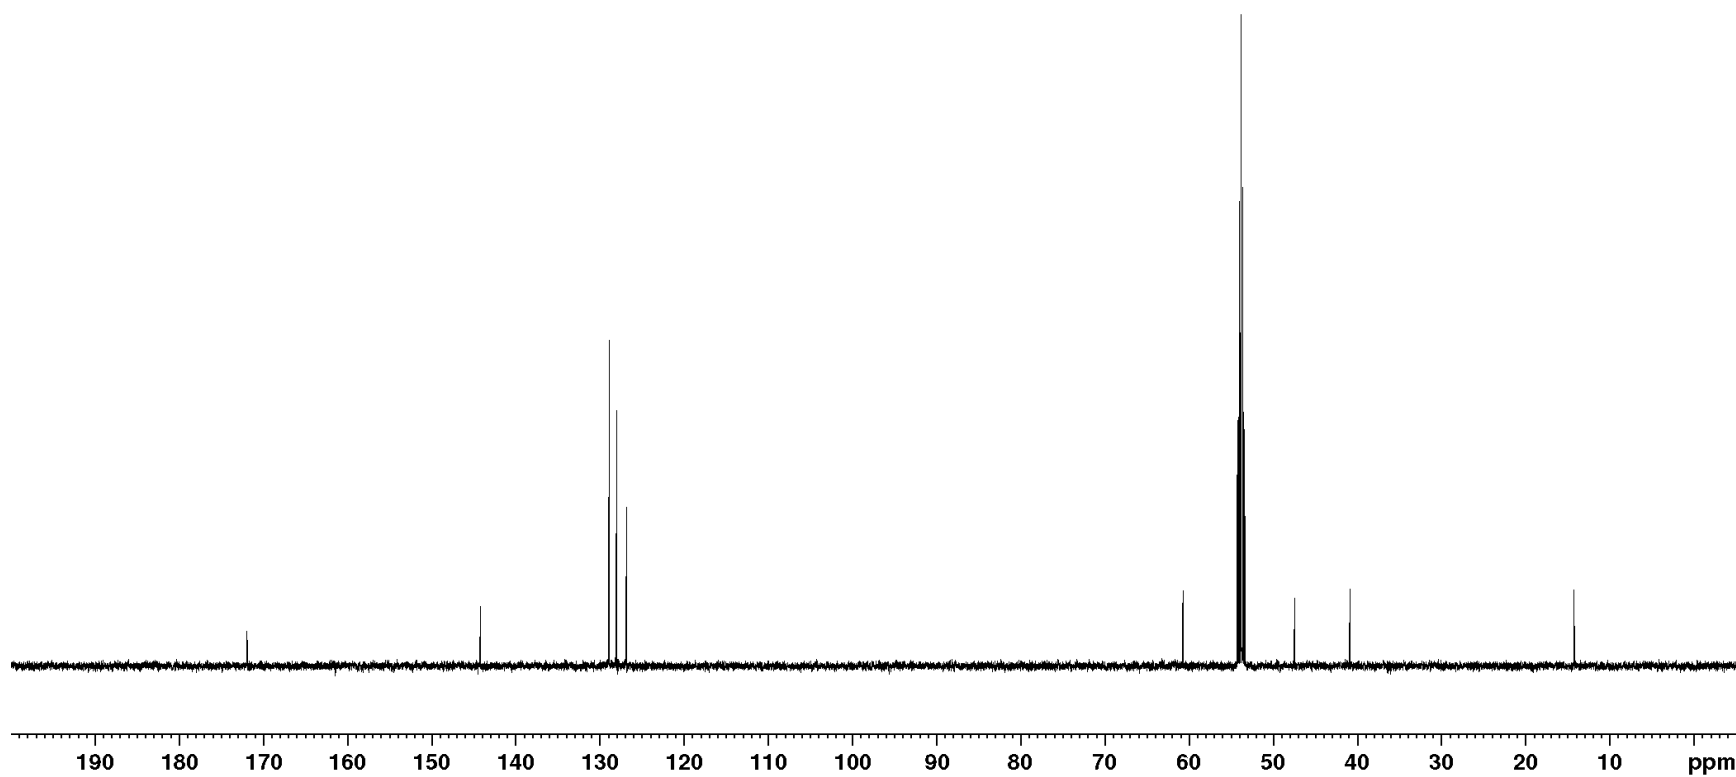

<sup>13</sup>C DEPT NMR

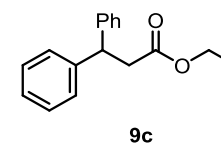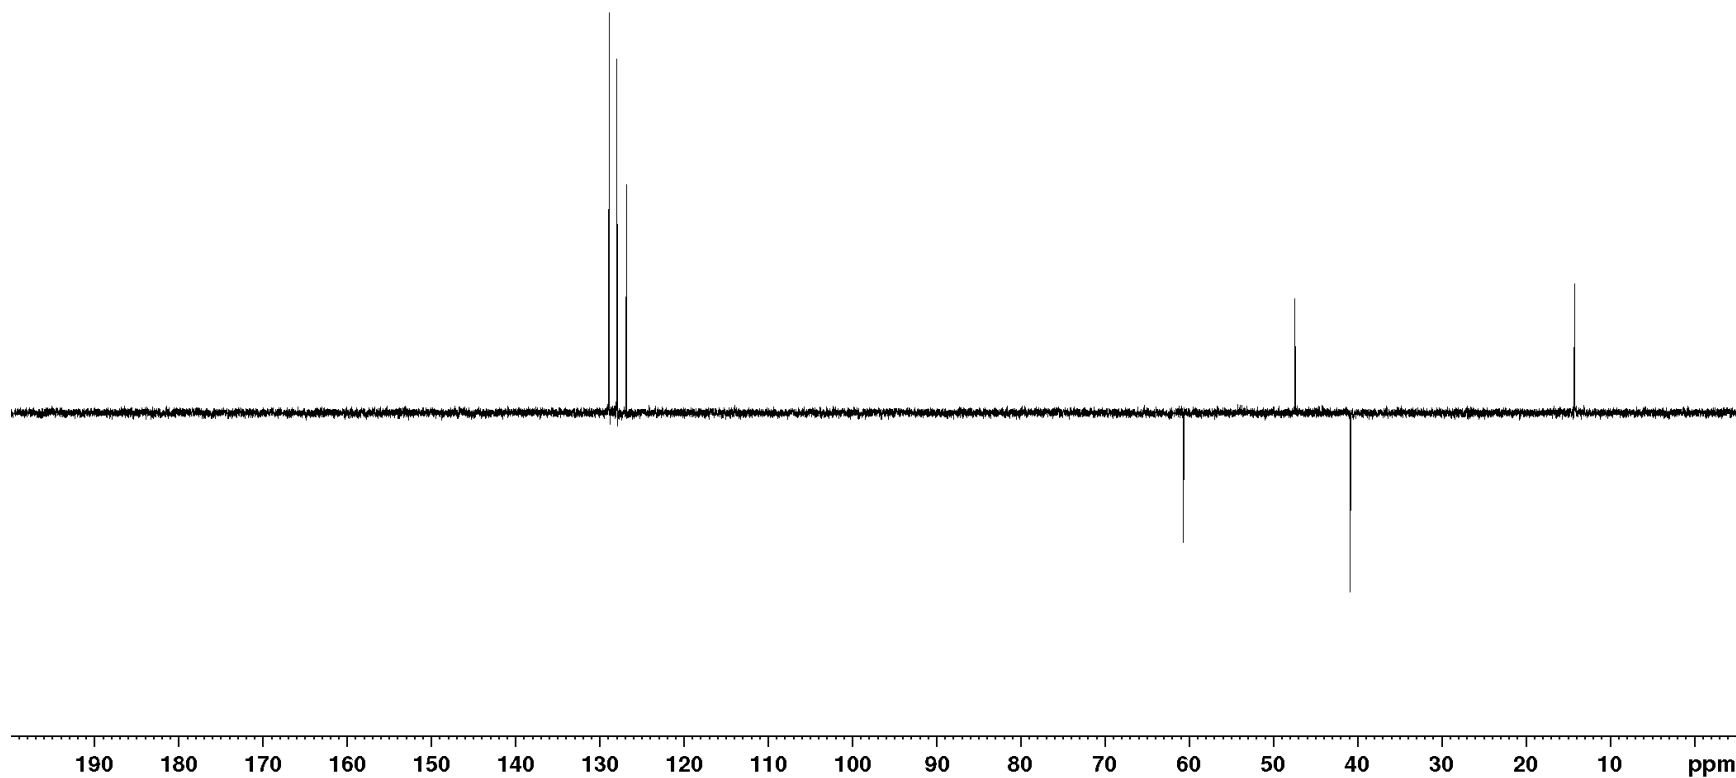

$^1\text{H}$ - $^1\text{H}$  COSY

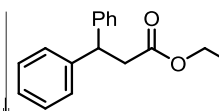

ppm

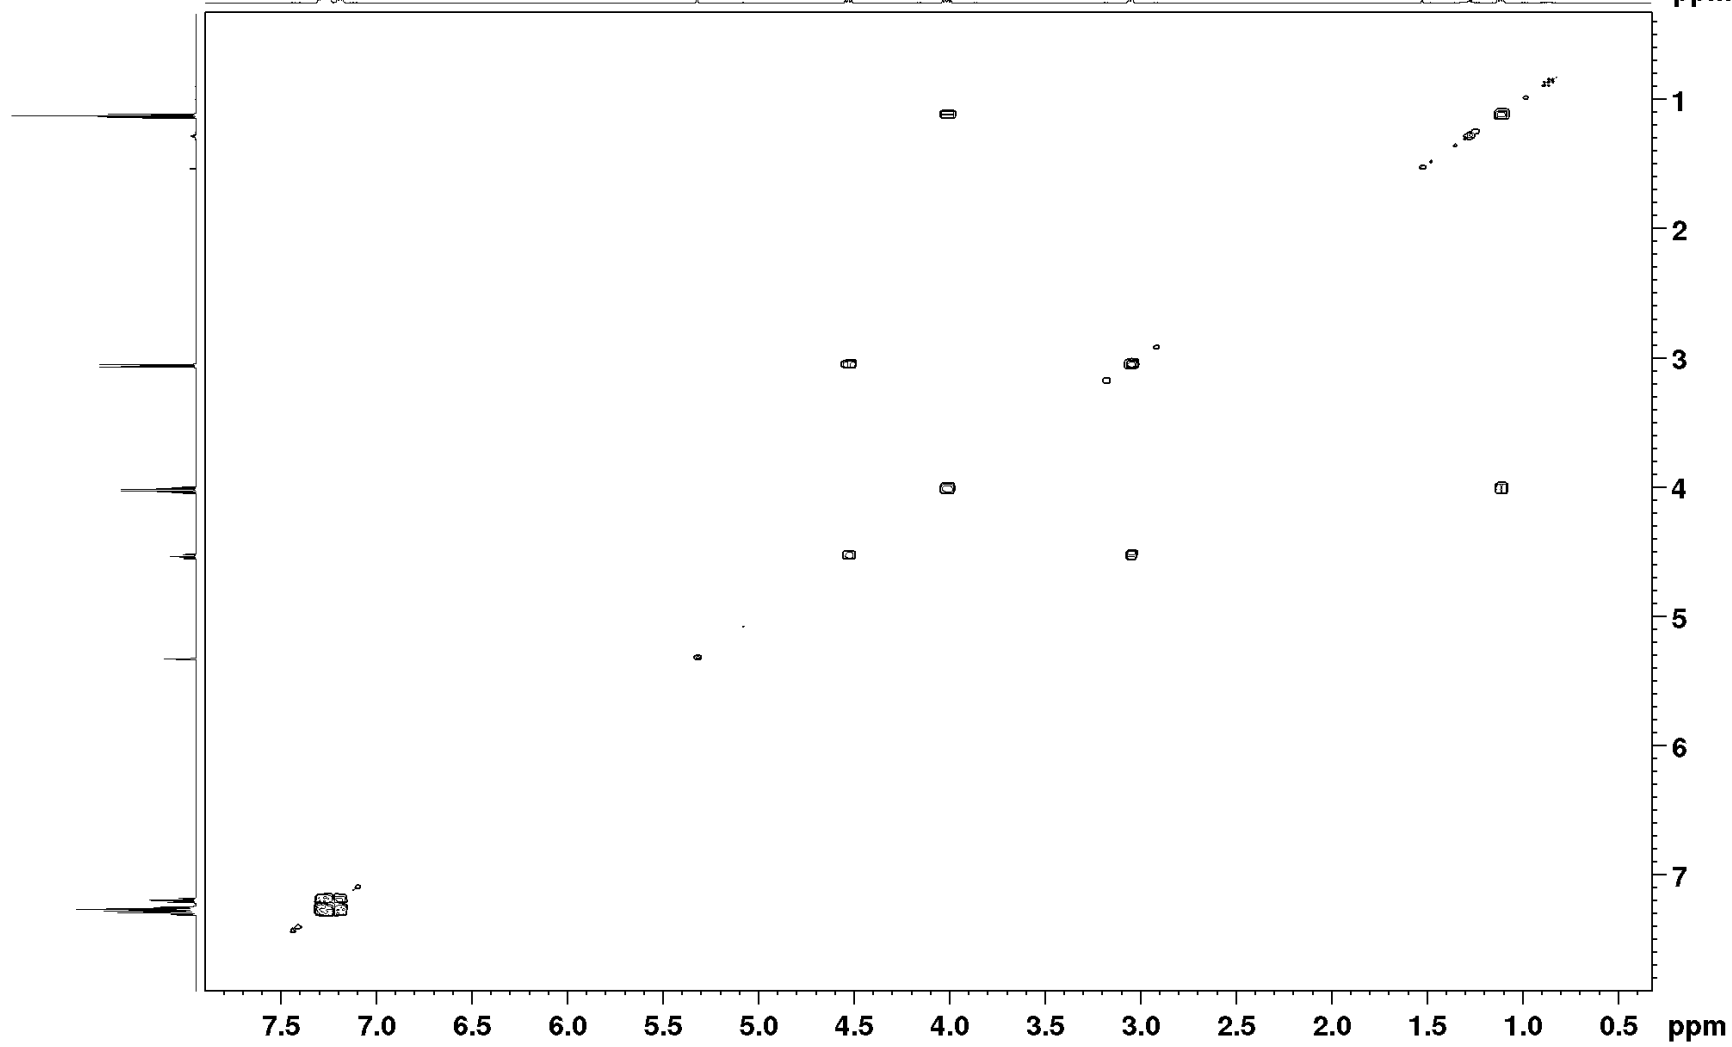

$^1\text{H}$ - $^{13}\text{C}$  HMQC

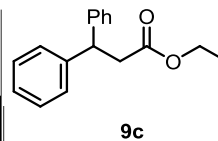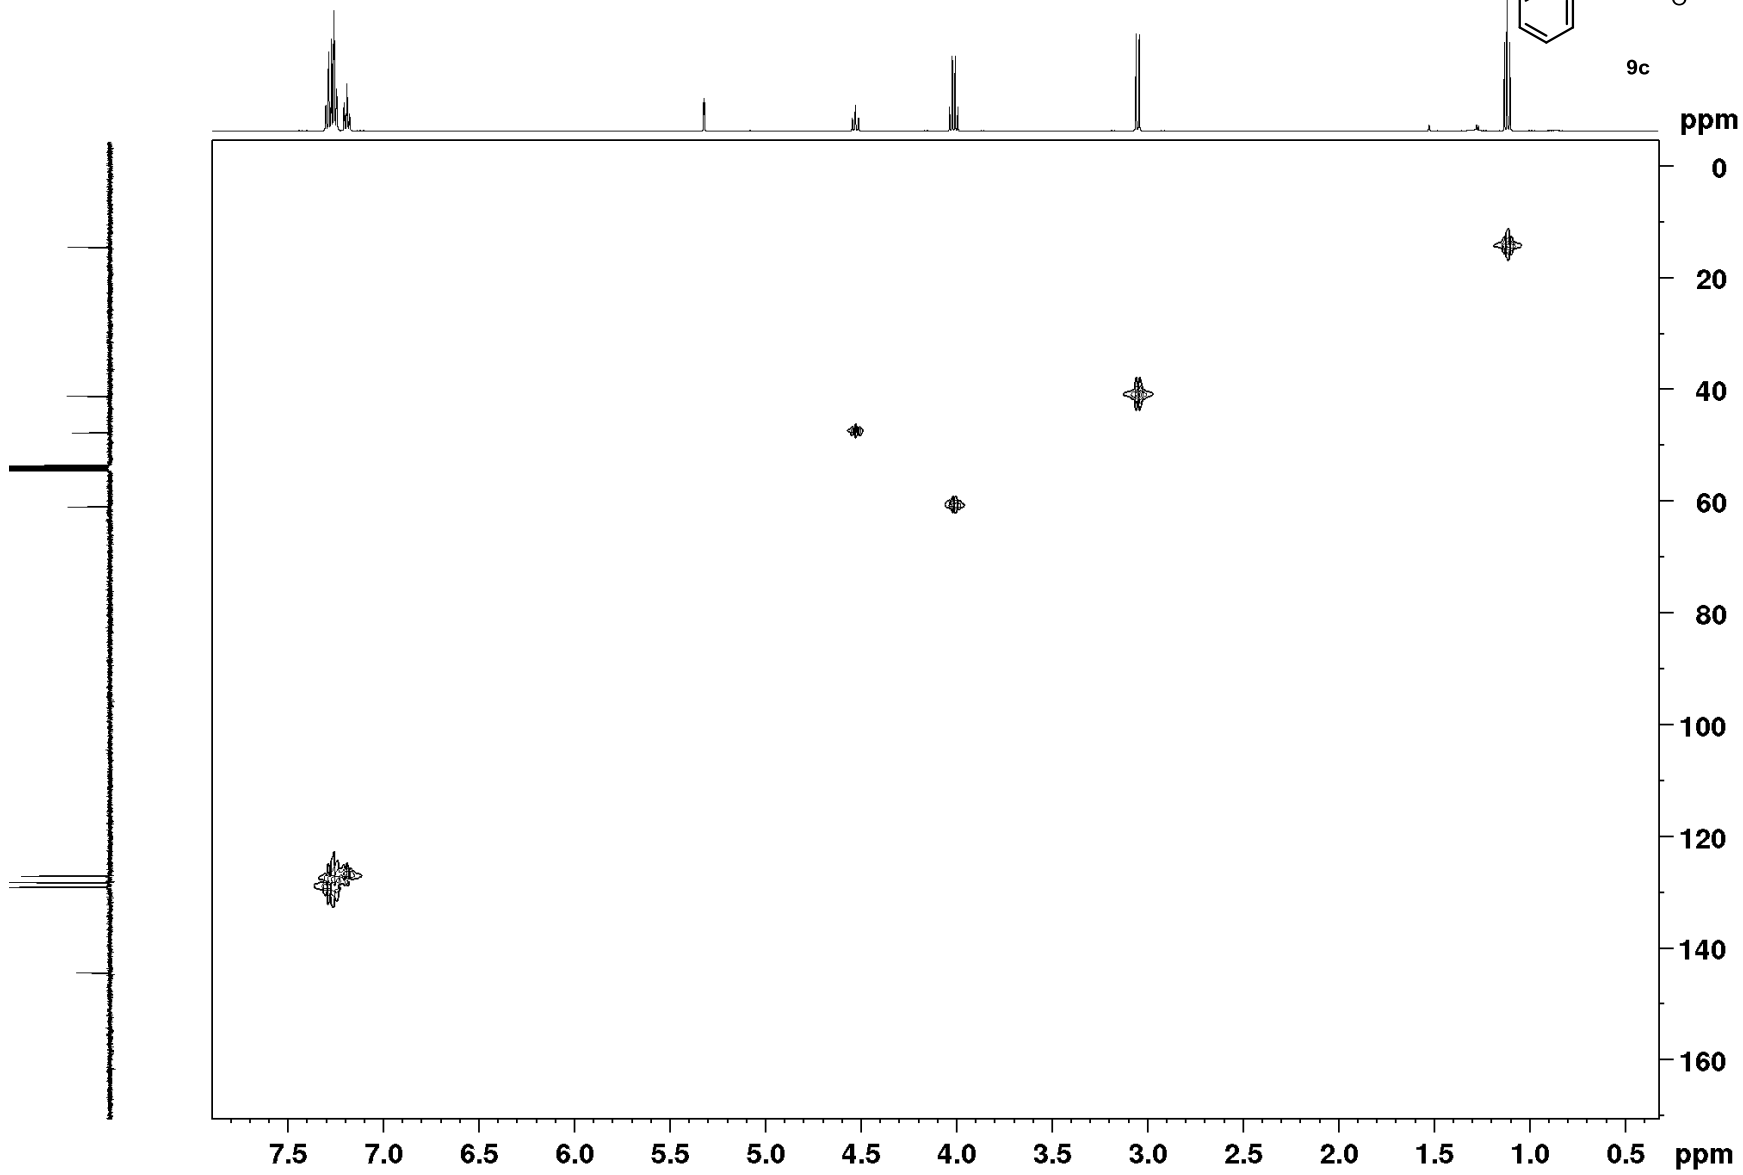

$^1\text{H}$ - $^{13}\text{C}$  HMBC

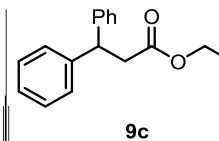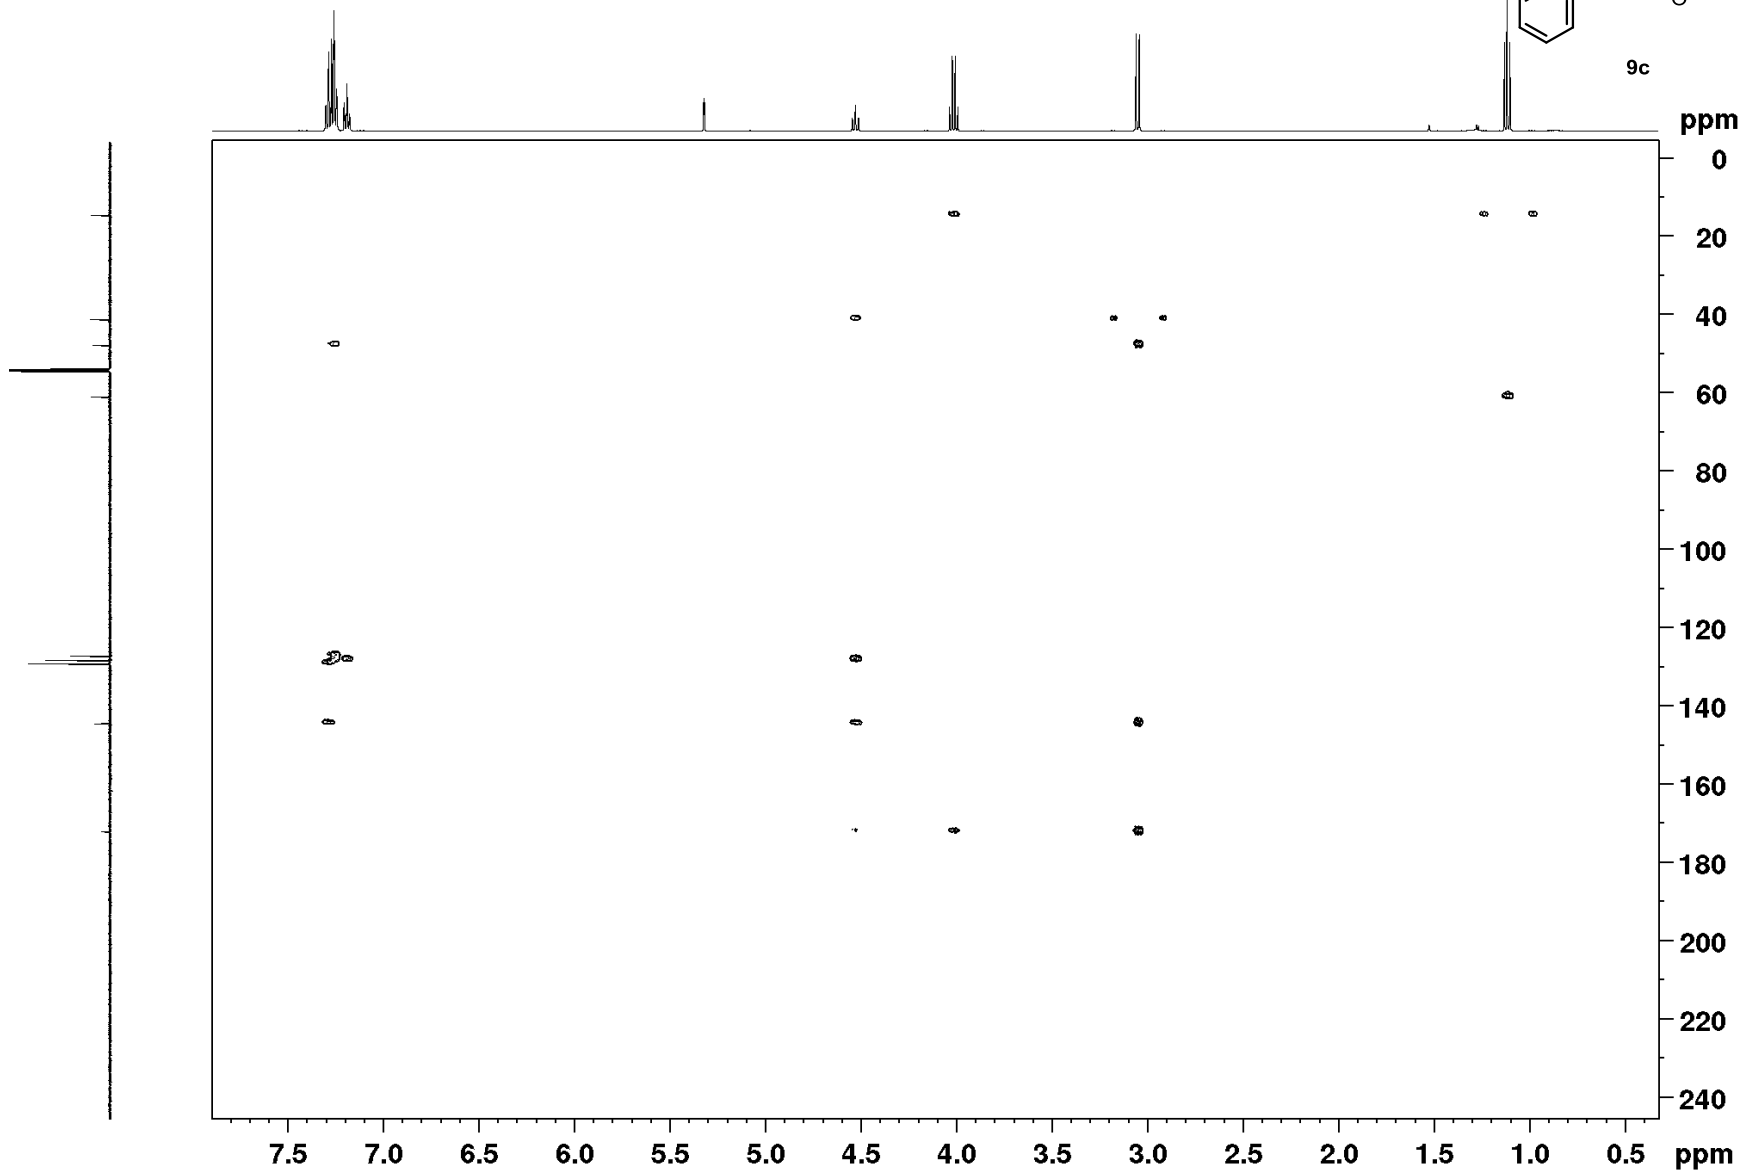



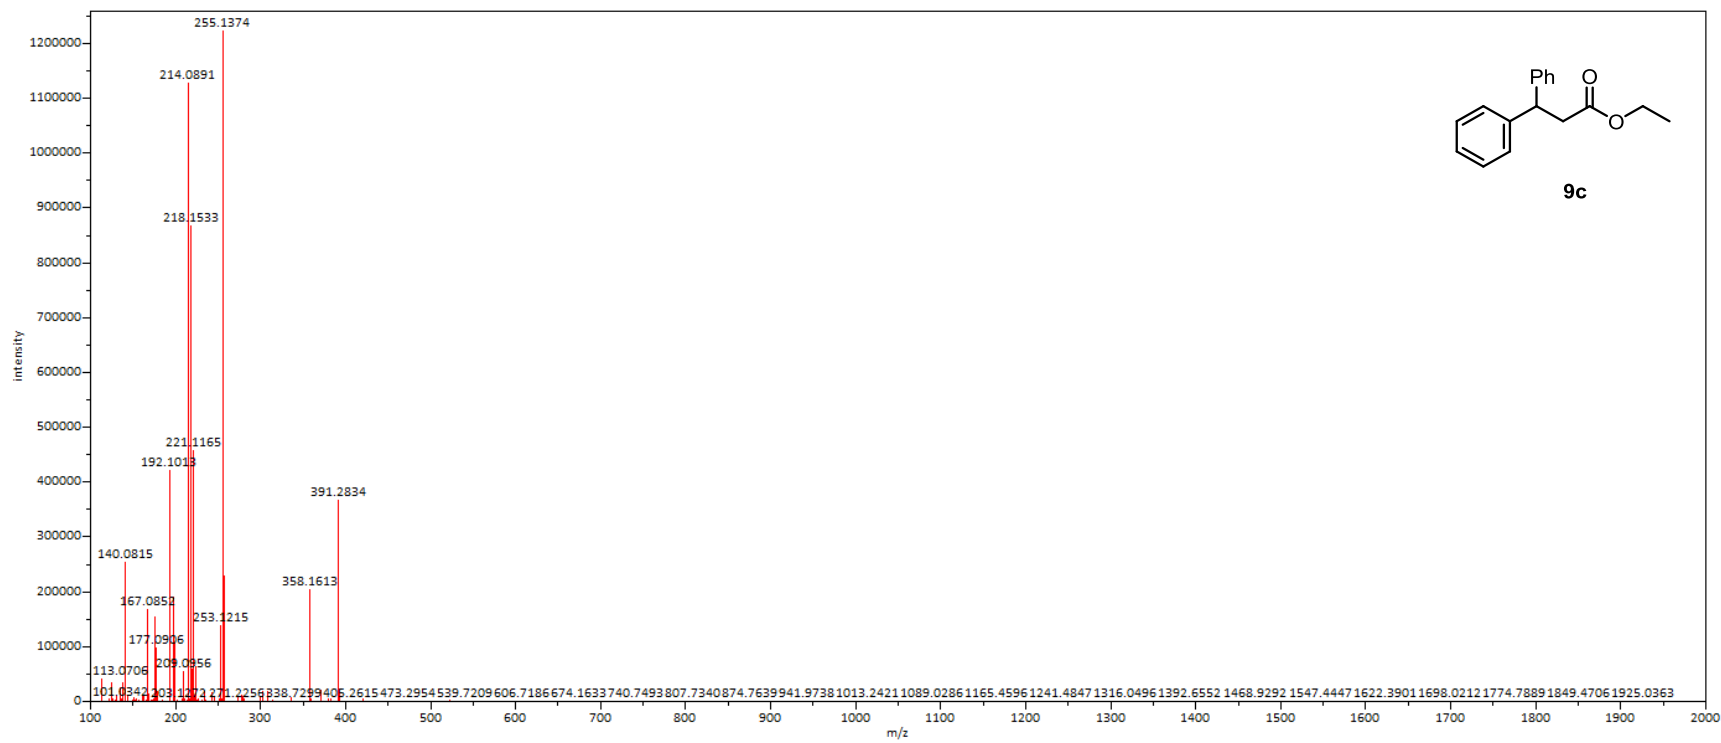

**Ethyl 3-(4-methoxyphenyl)butanoate (9d)**

<sup>1</sup>H NMR

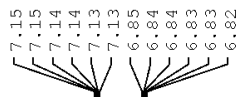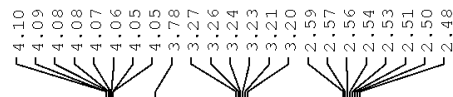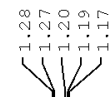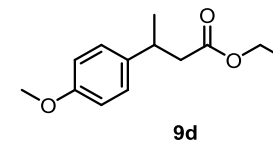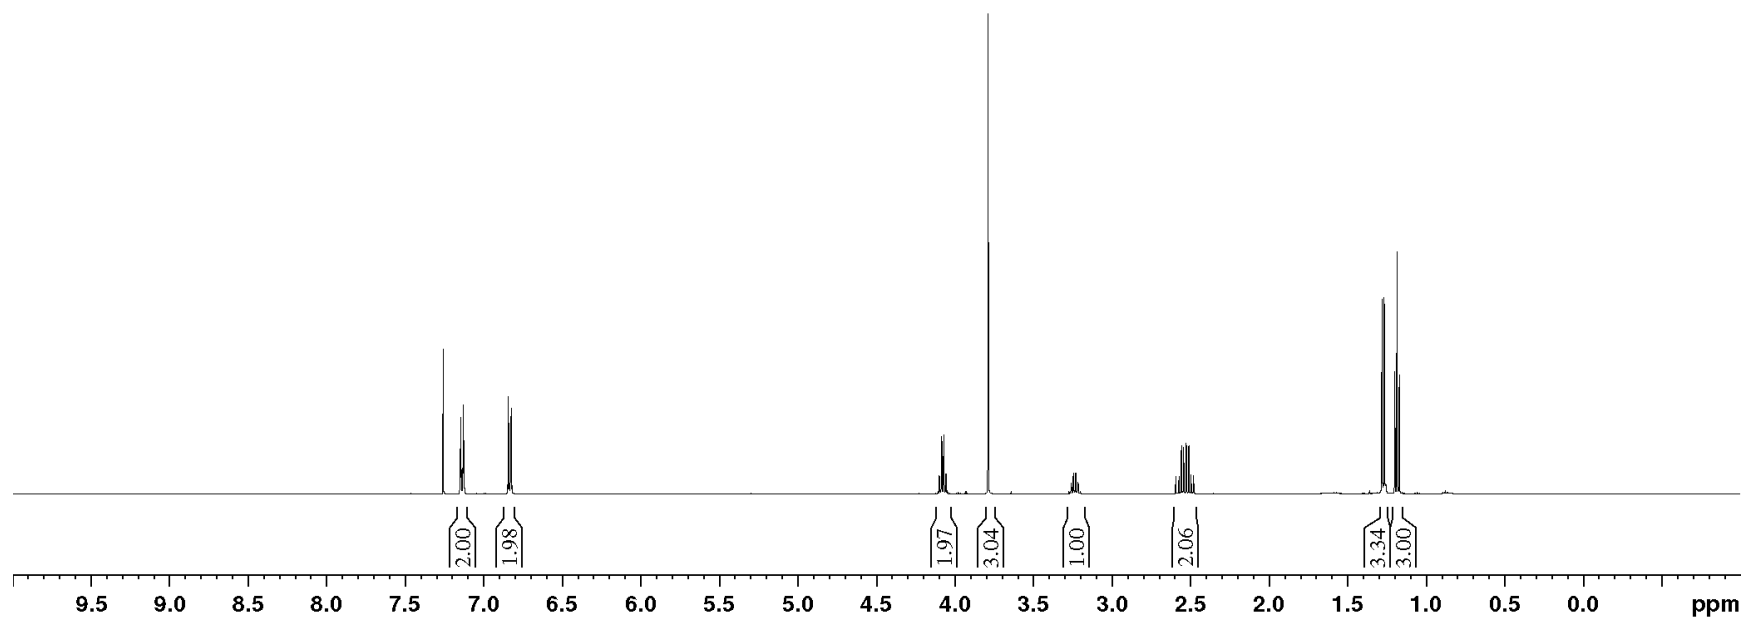

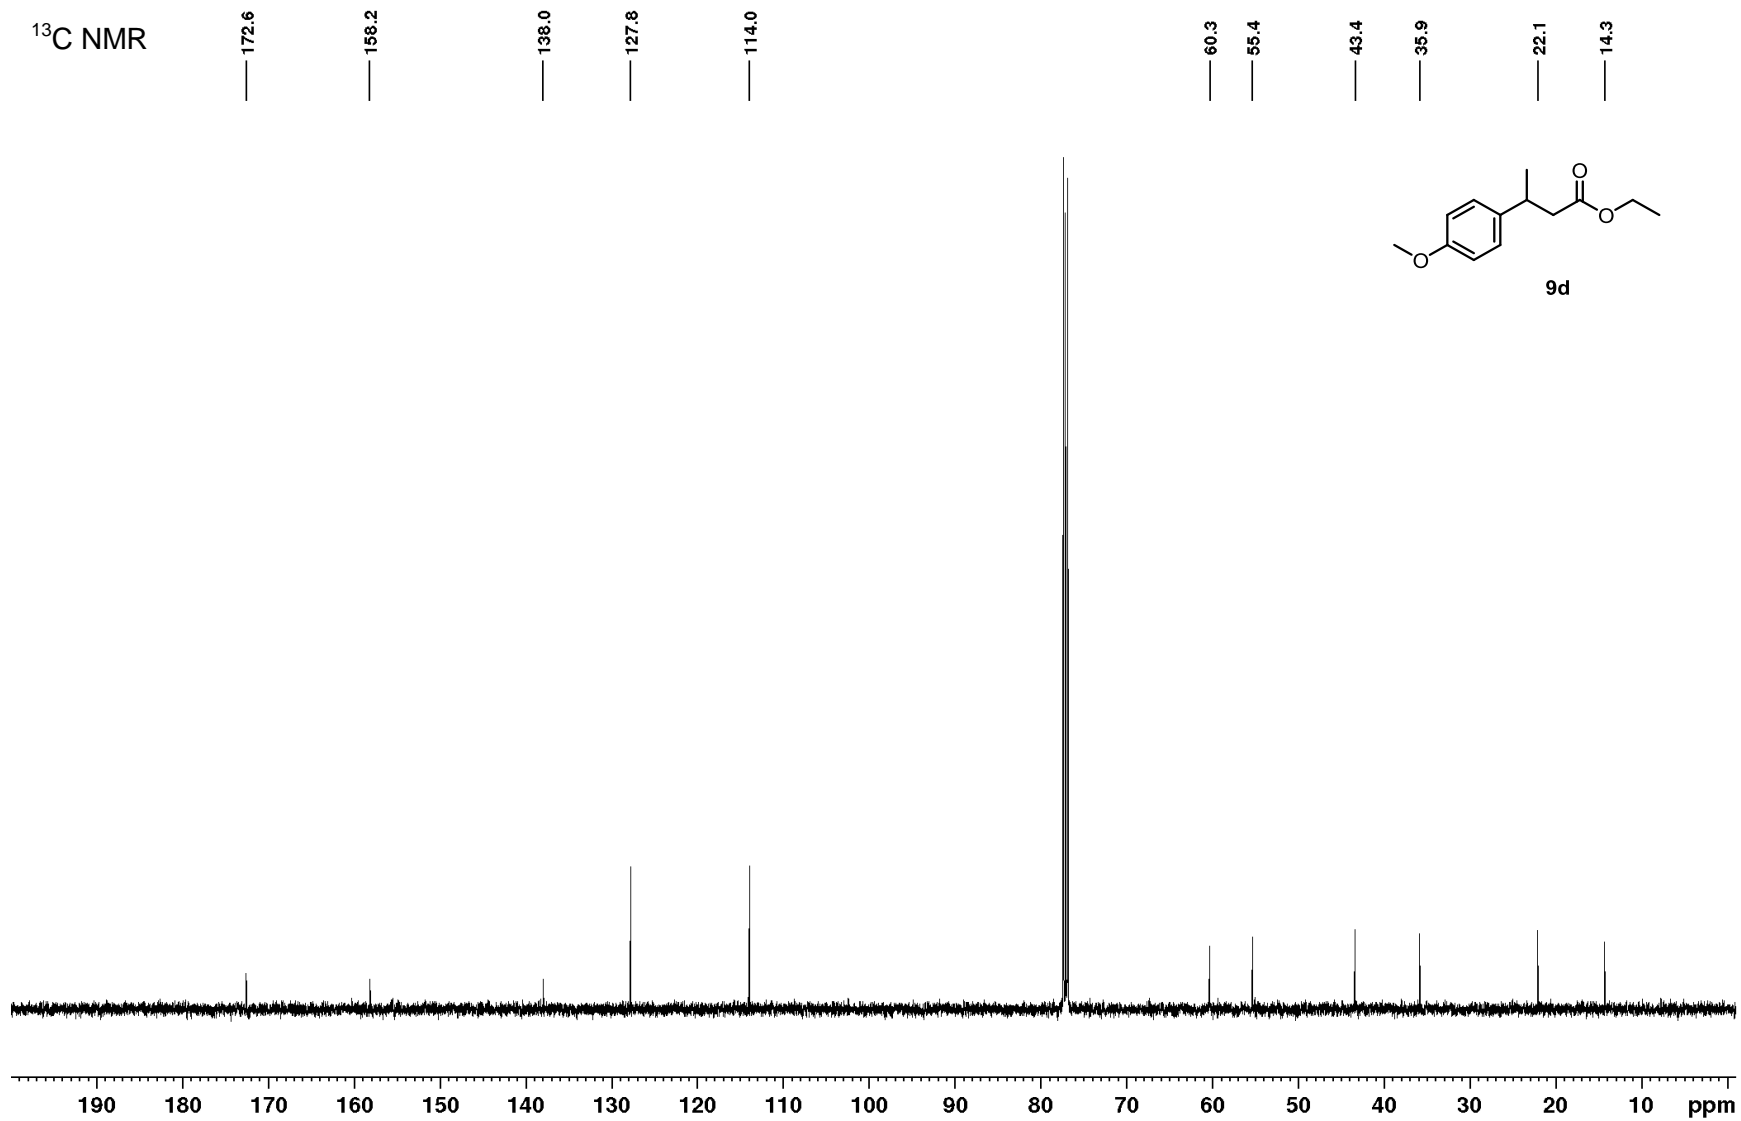

<sup>13</sup>C DEPT NMR

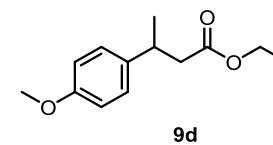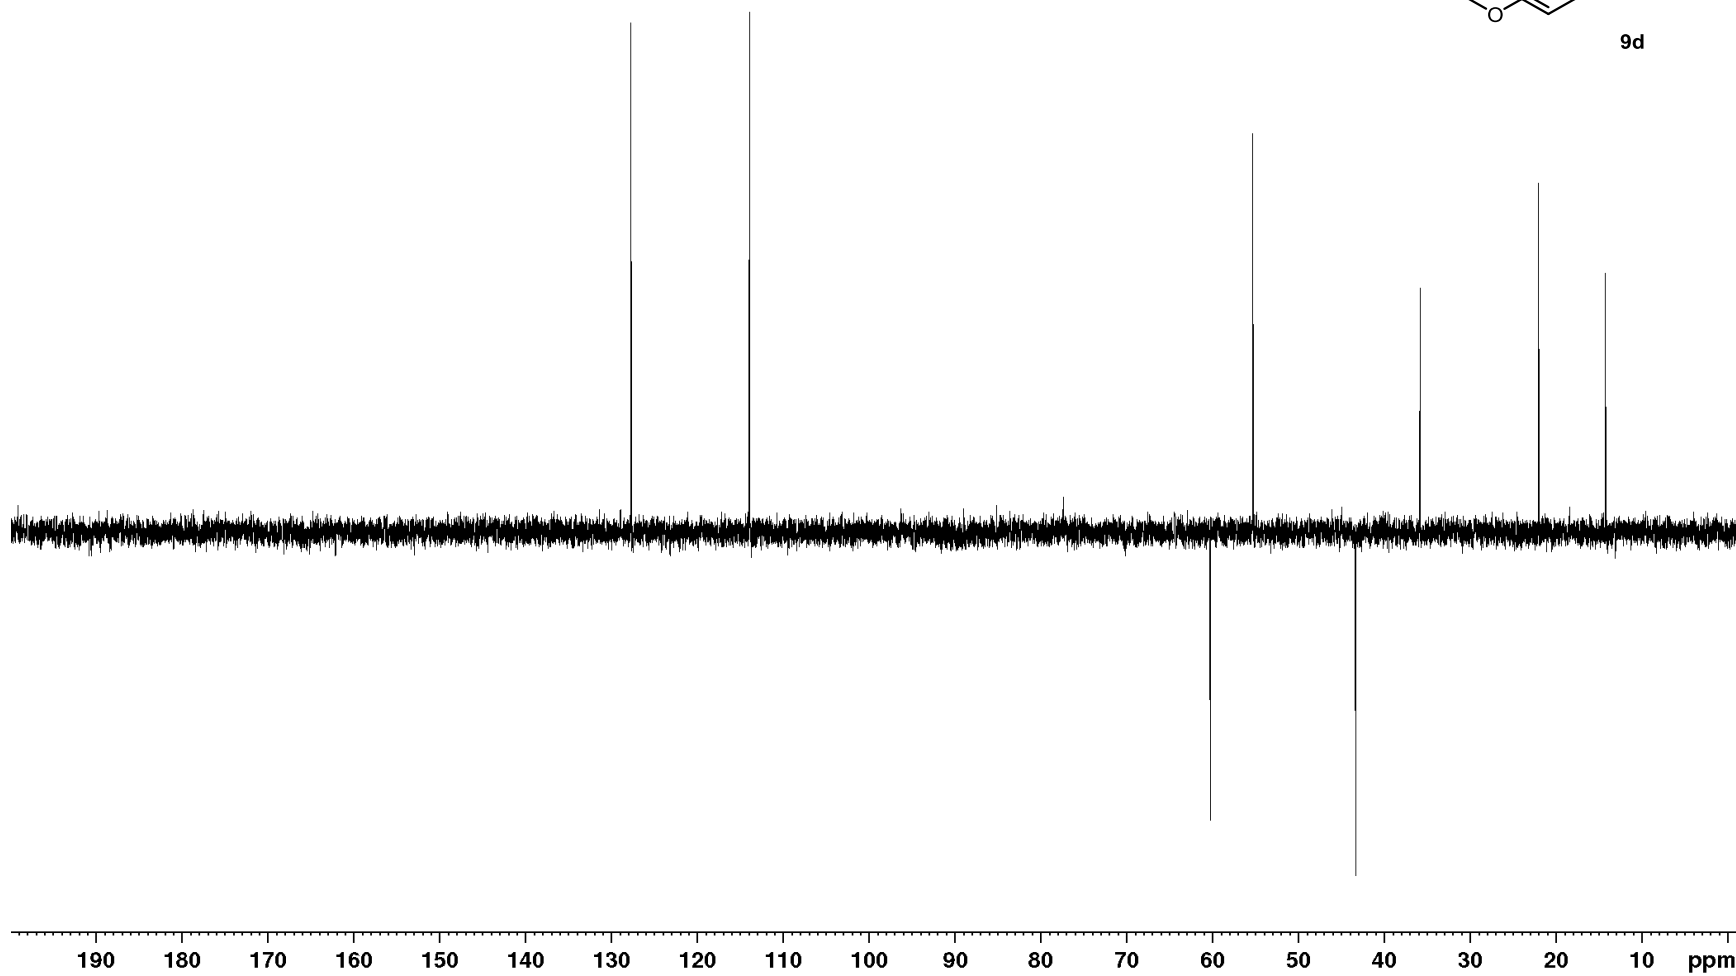

$^1\text{H}$ - $^1\text{H}$  COSY

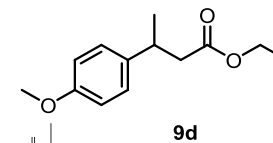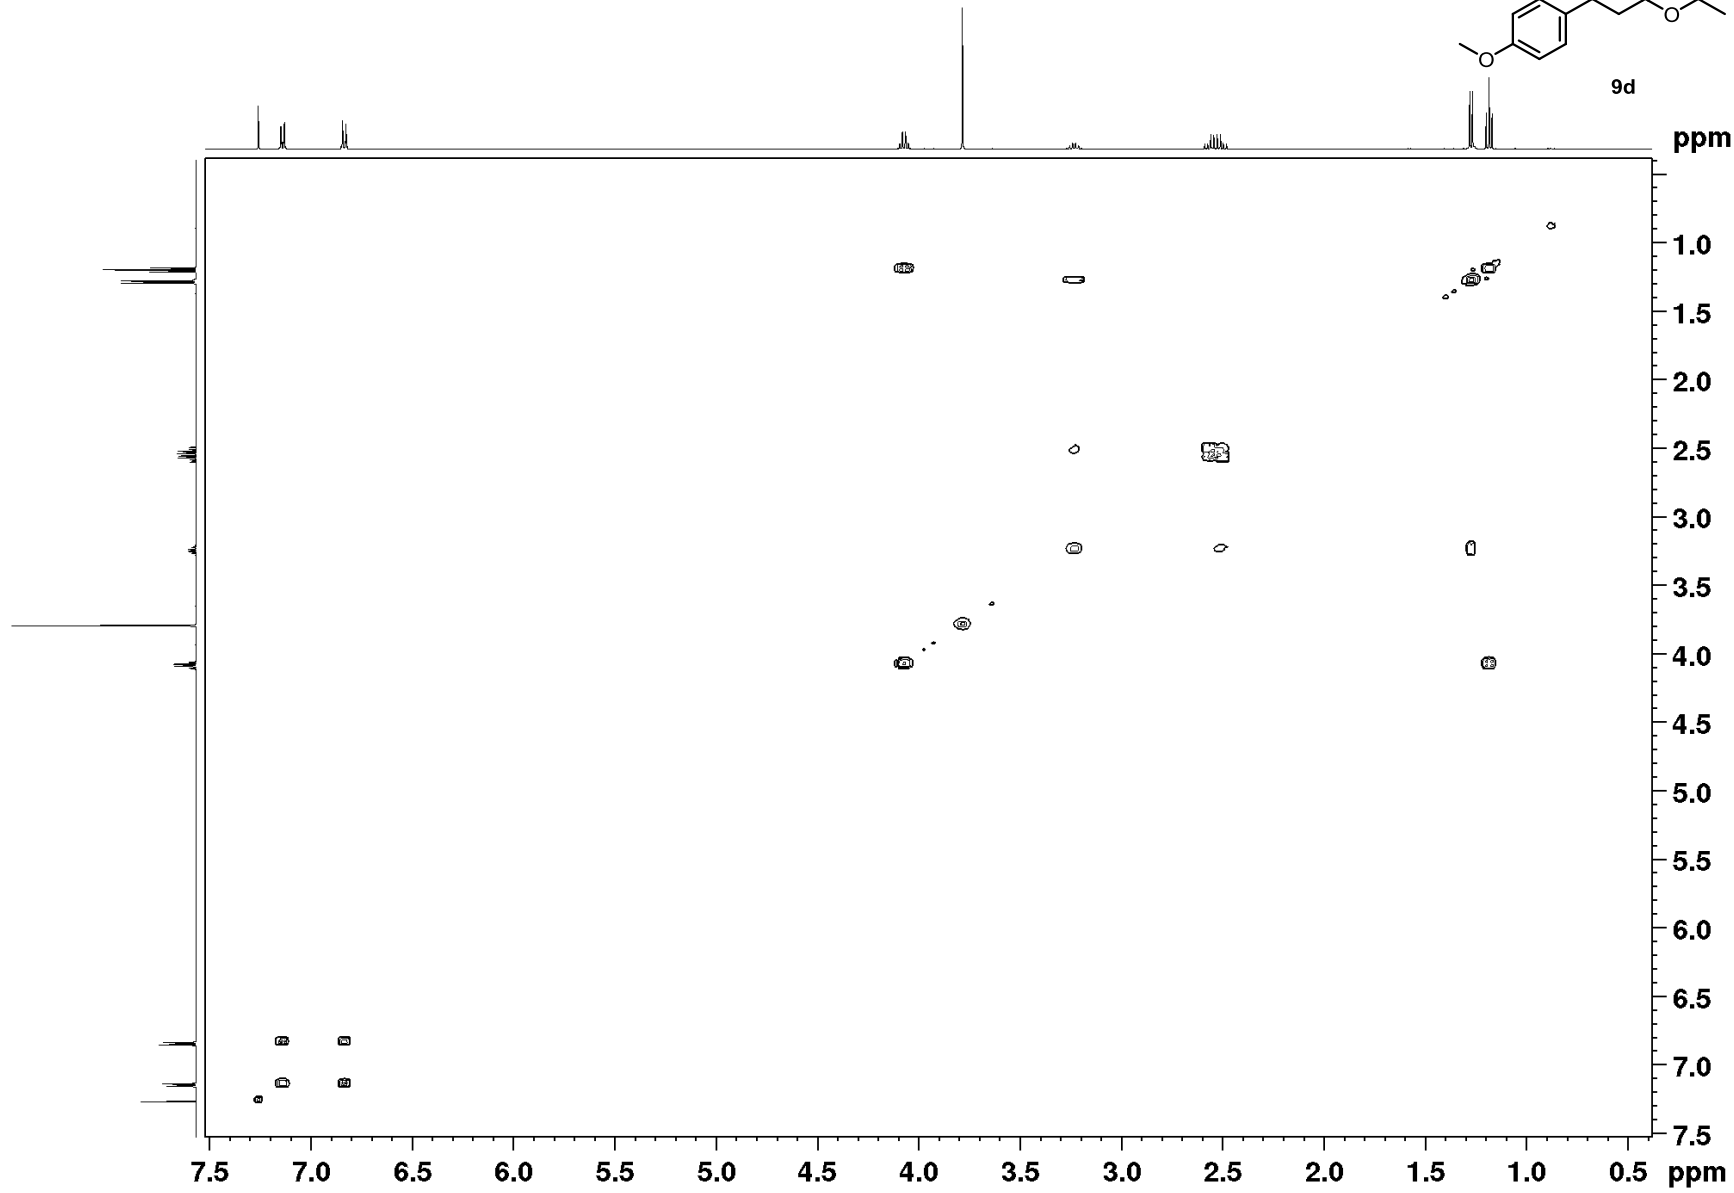



$^1\text{H}$ - $^{13}\text{C}$  HMBC

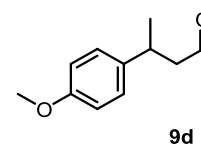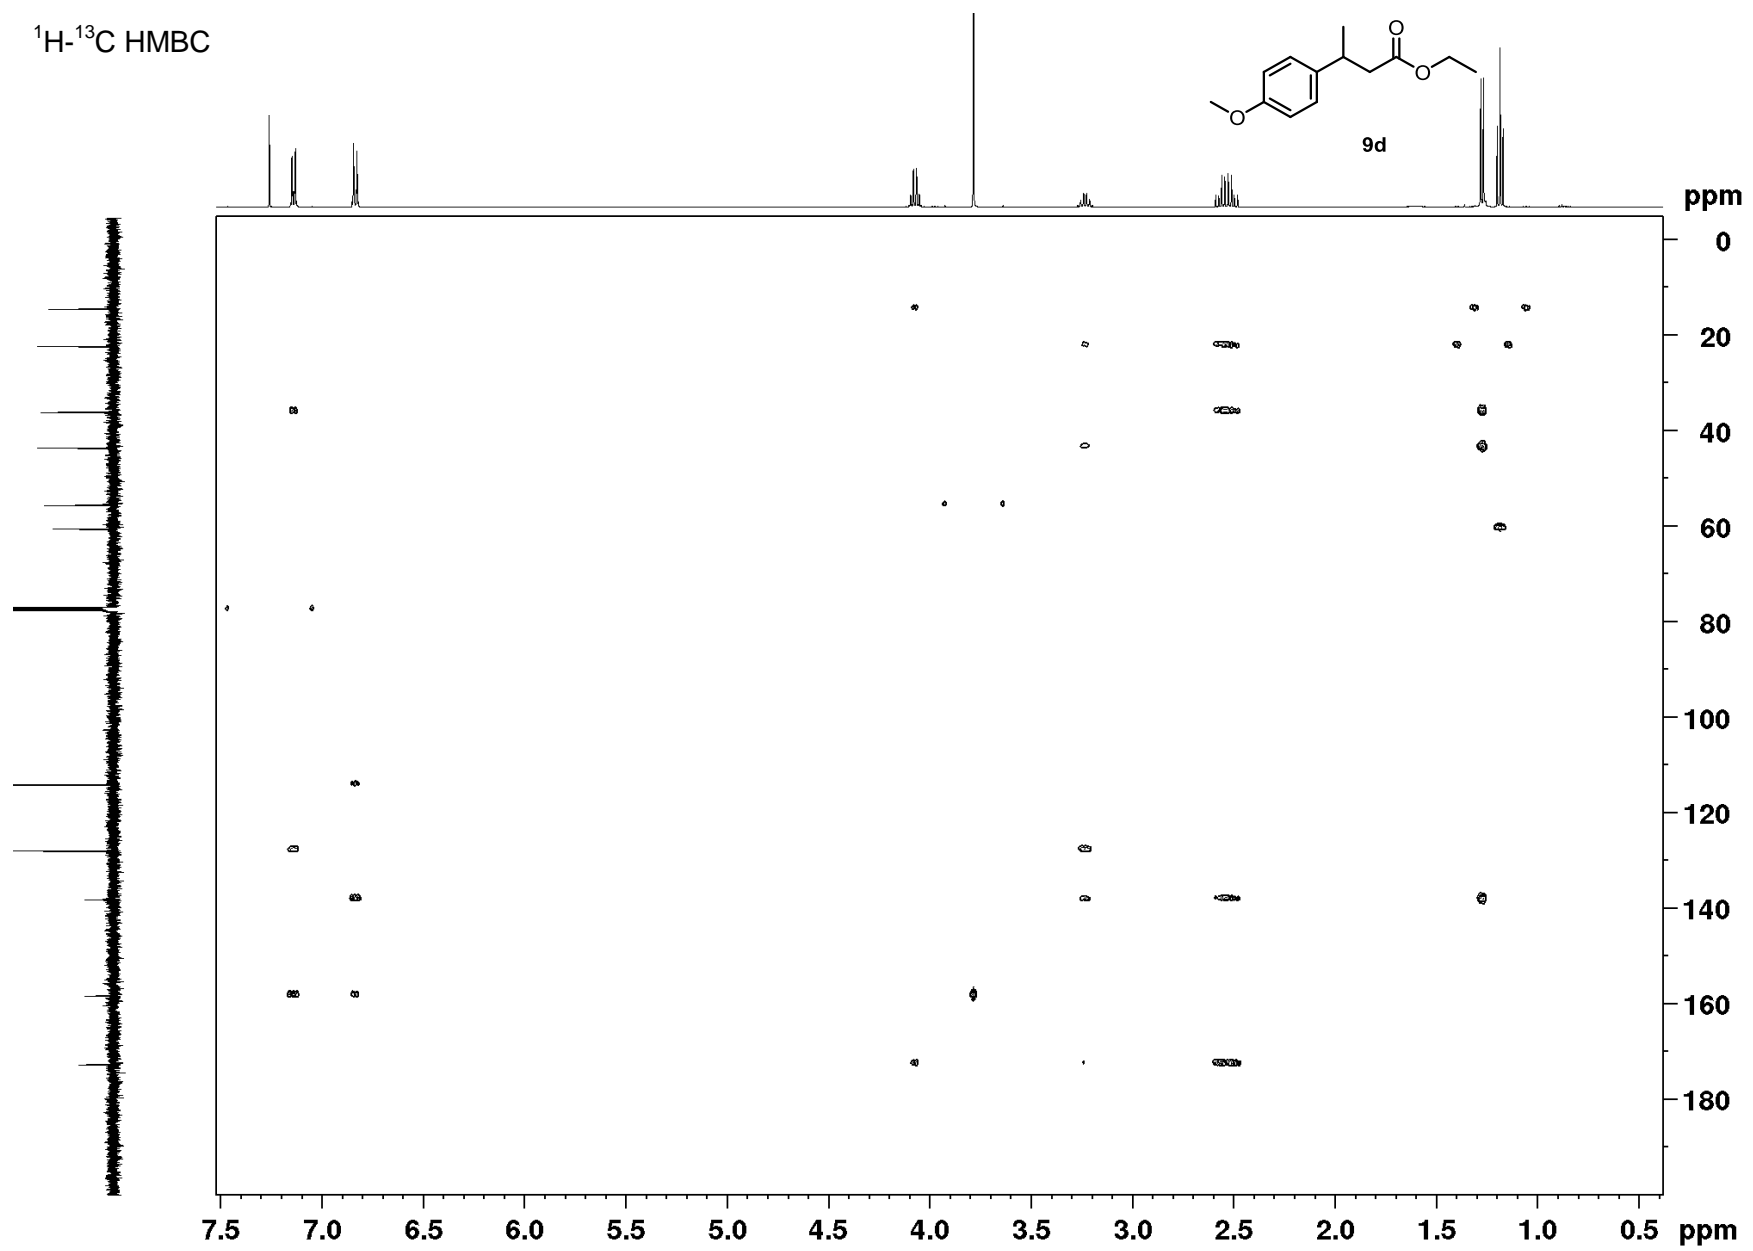

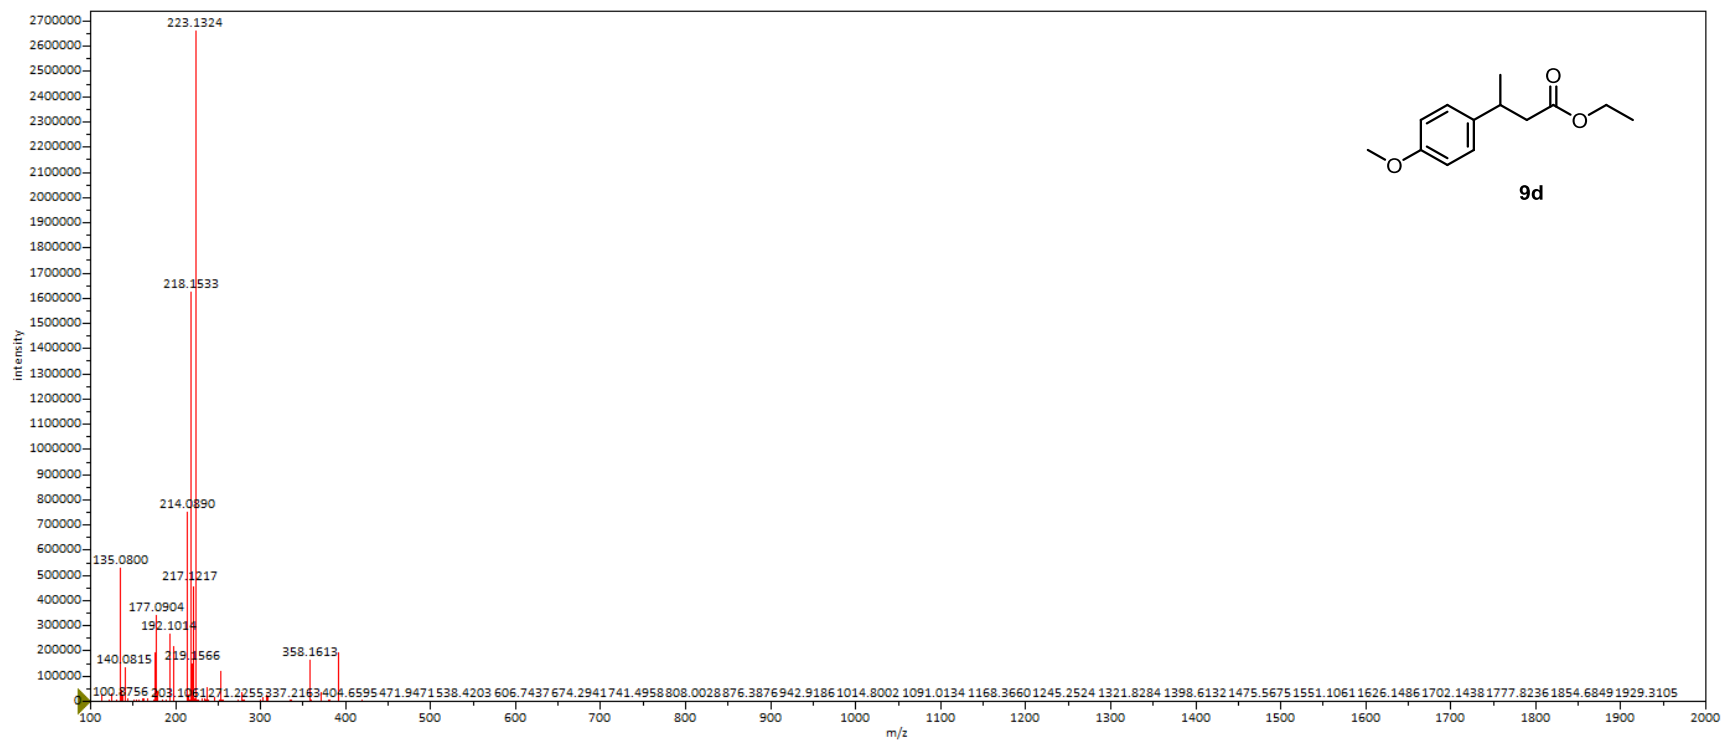



Ethyl 3-(4-(trifluoromethyl)phenyl)butanoate (9e)

<sup>1</sup>H NMR

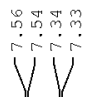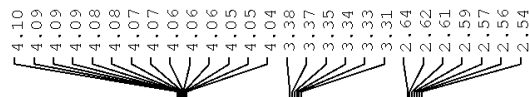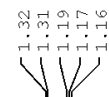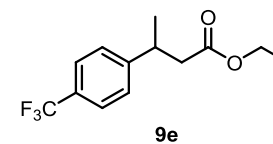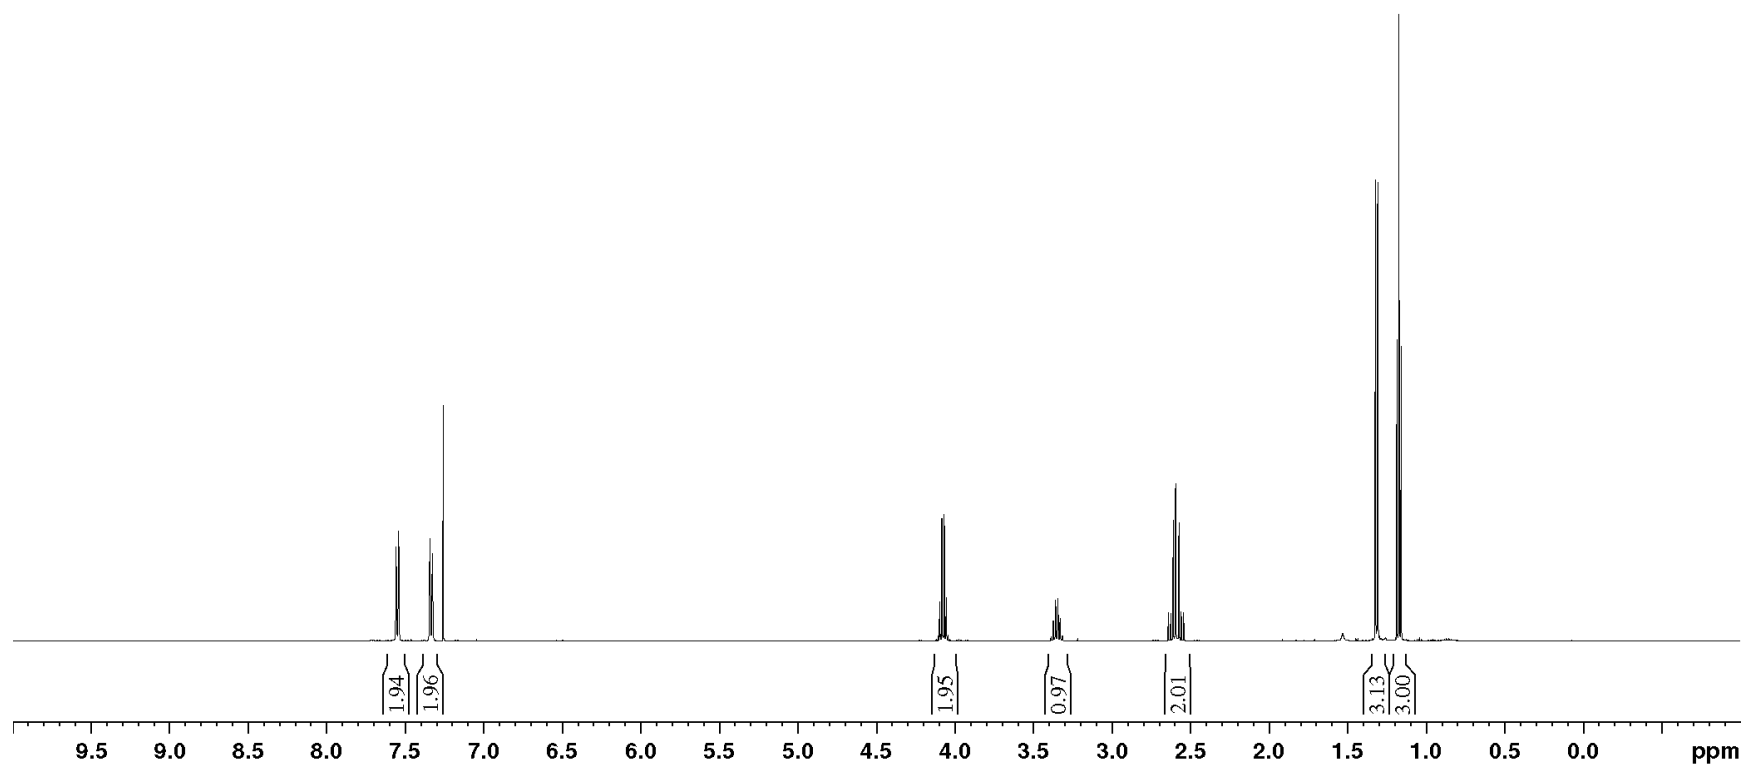

<sup>13</sup>C NMR

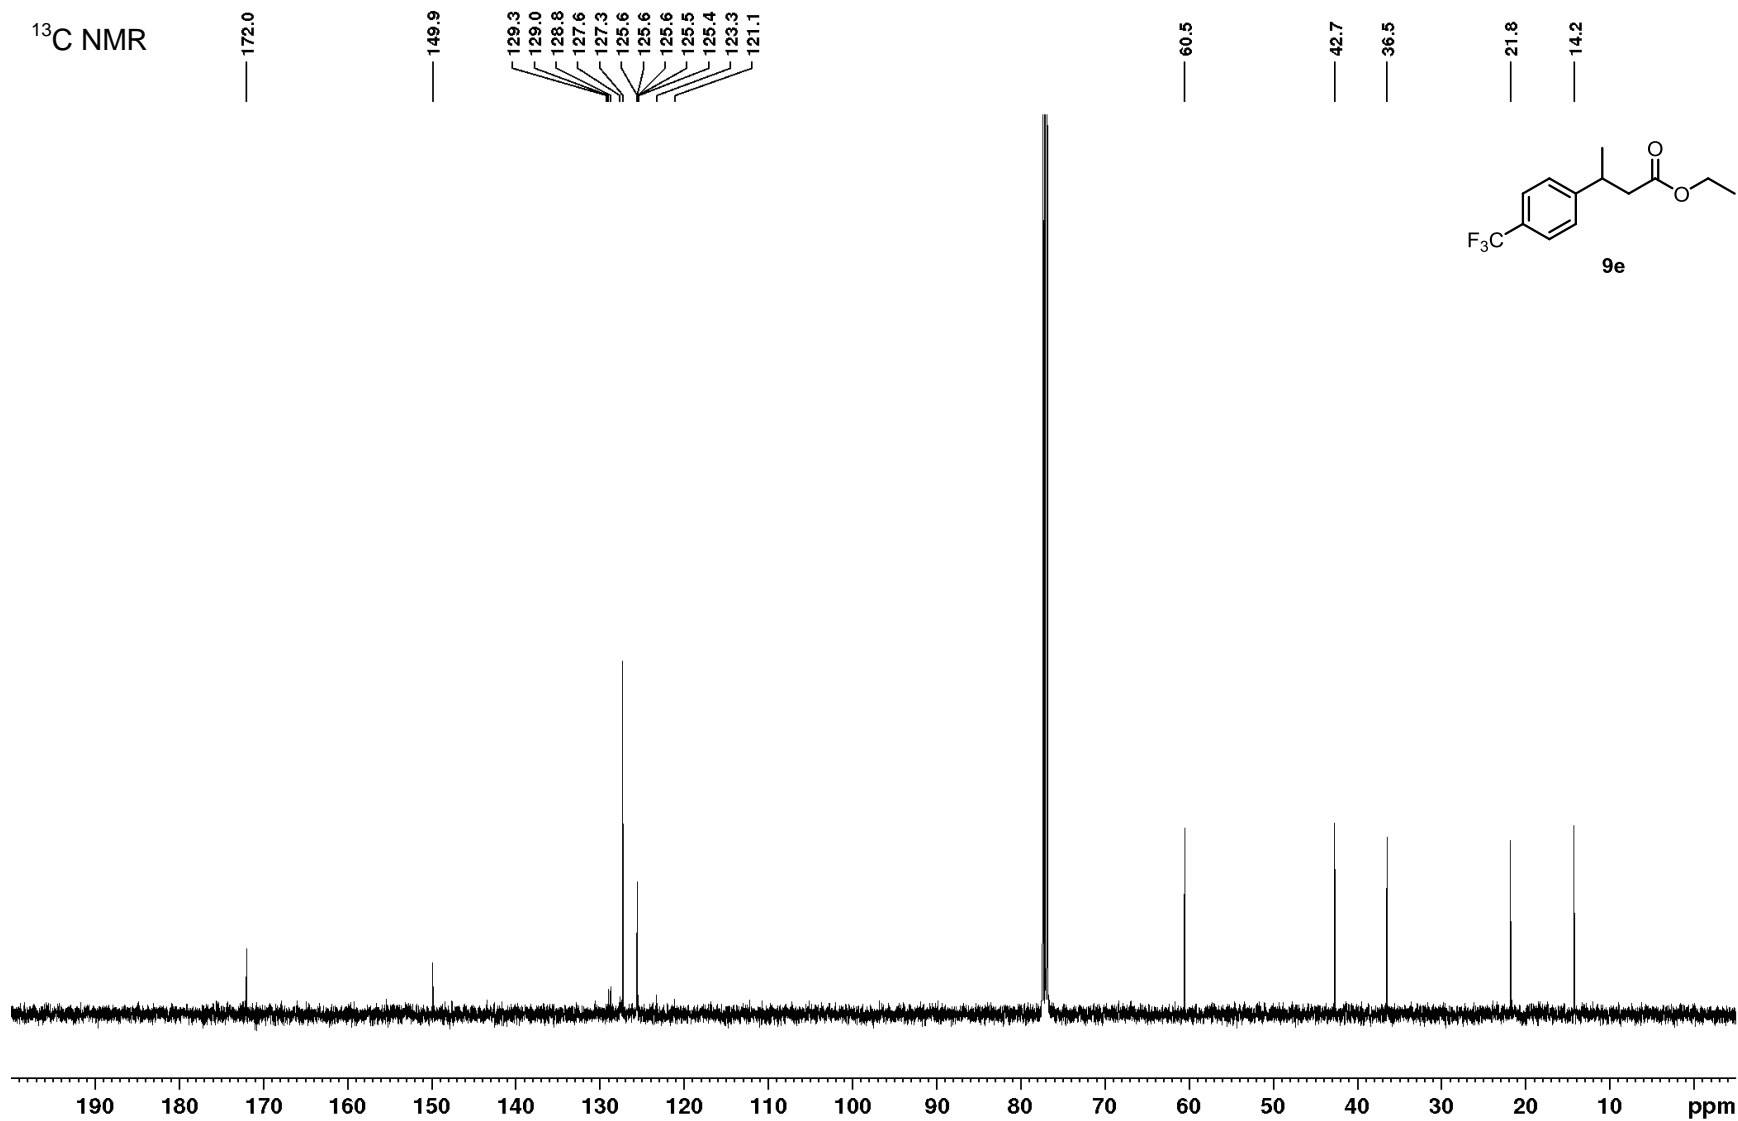

<sup>13</sup>C DEPT NMR

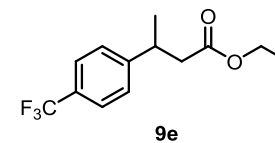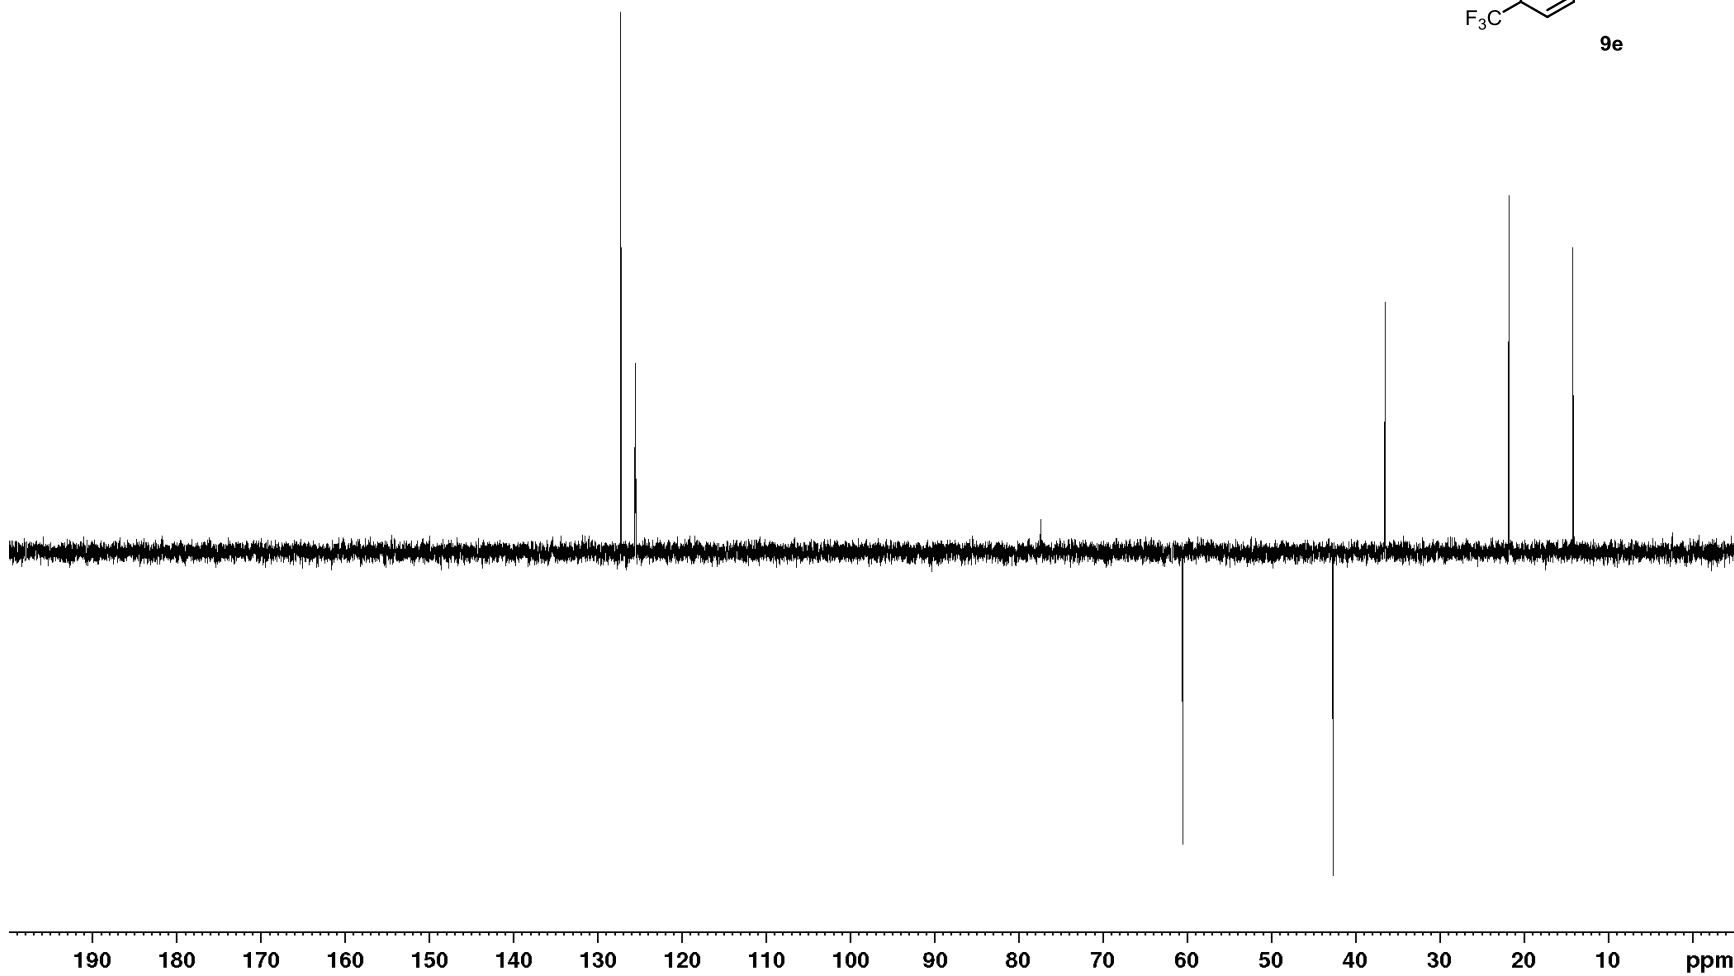

<sup>19</sup>F NMR

-62.41

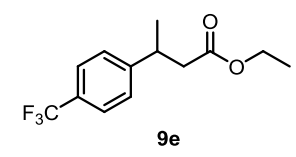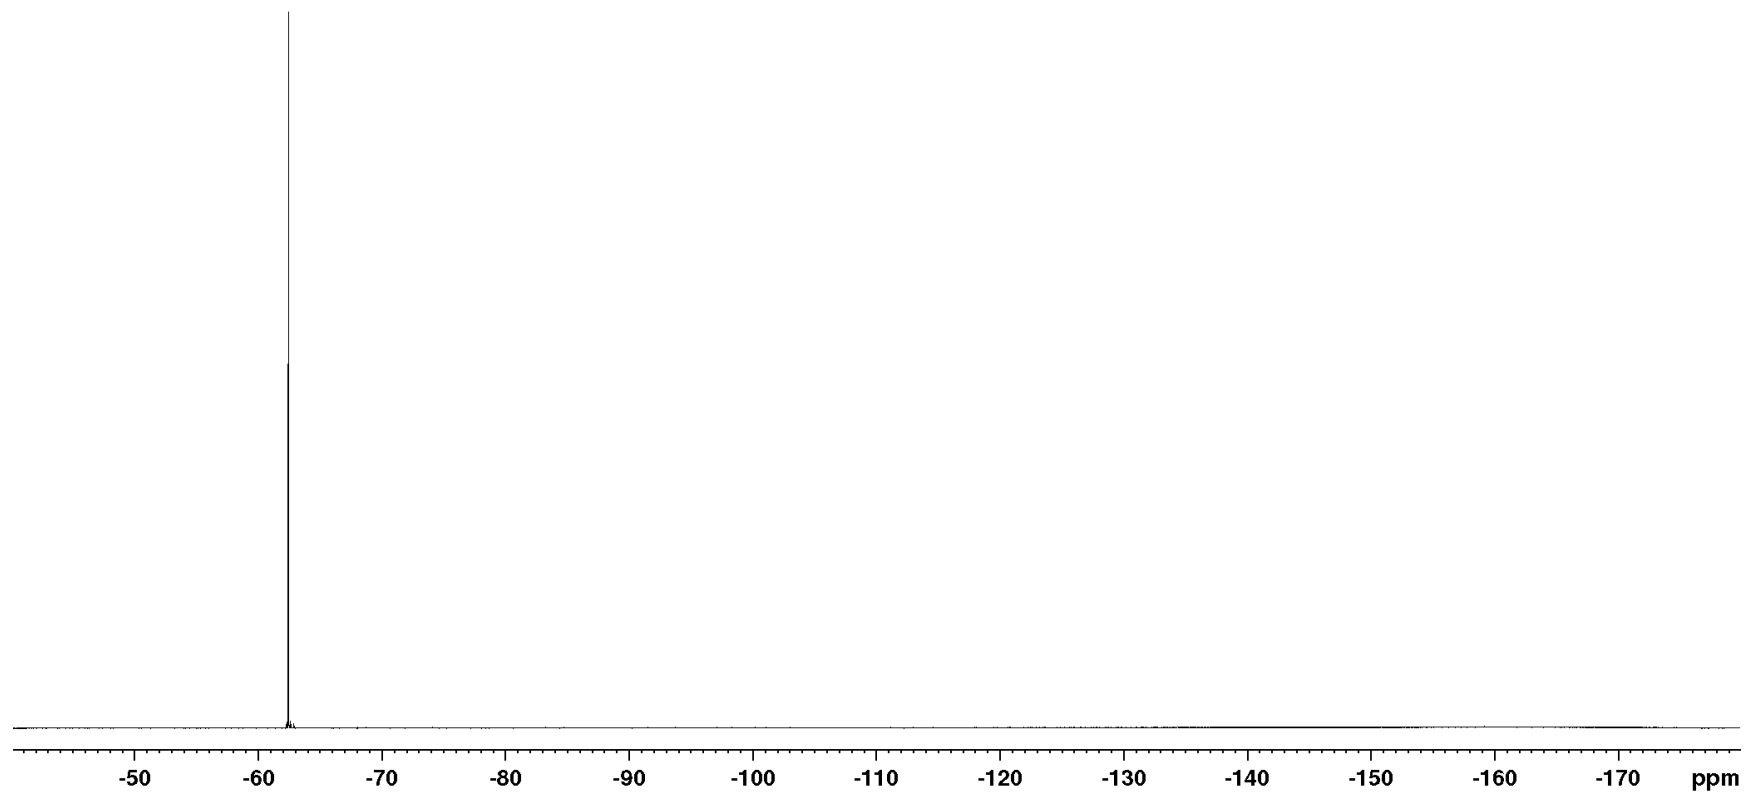

<sup>1</sup>H-<sup>1</sup>H COSY

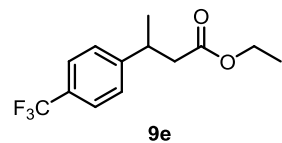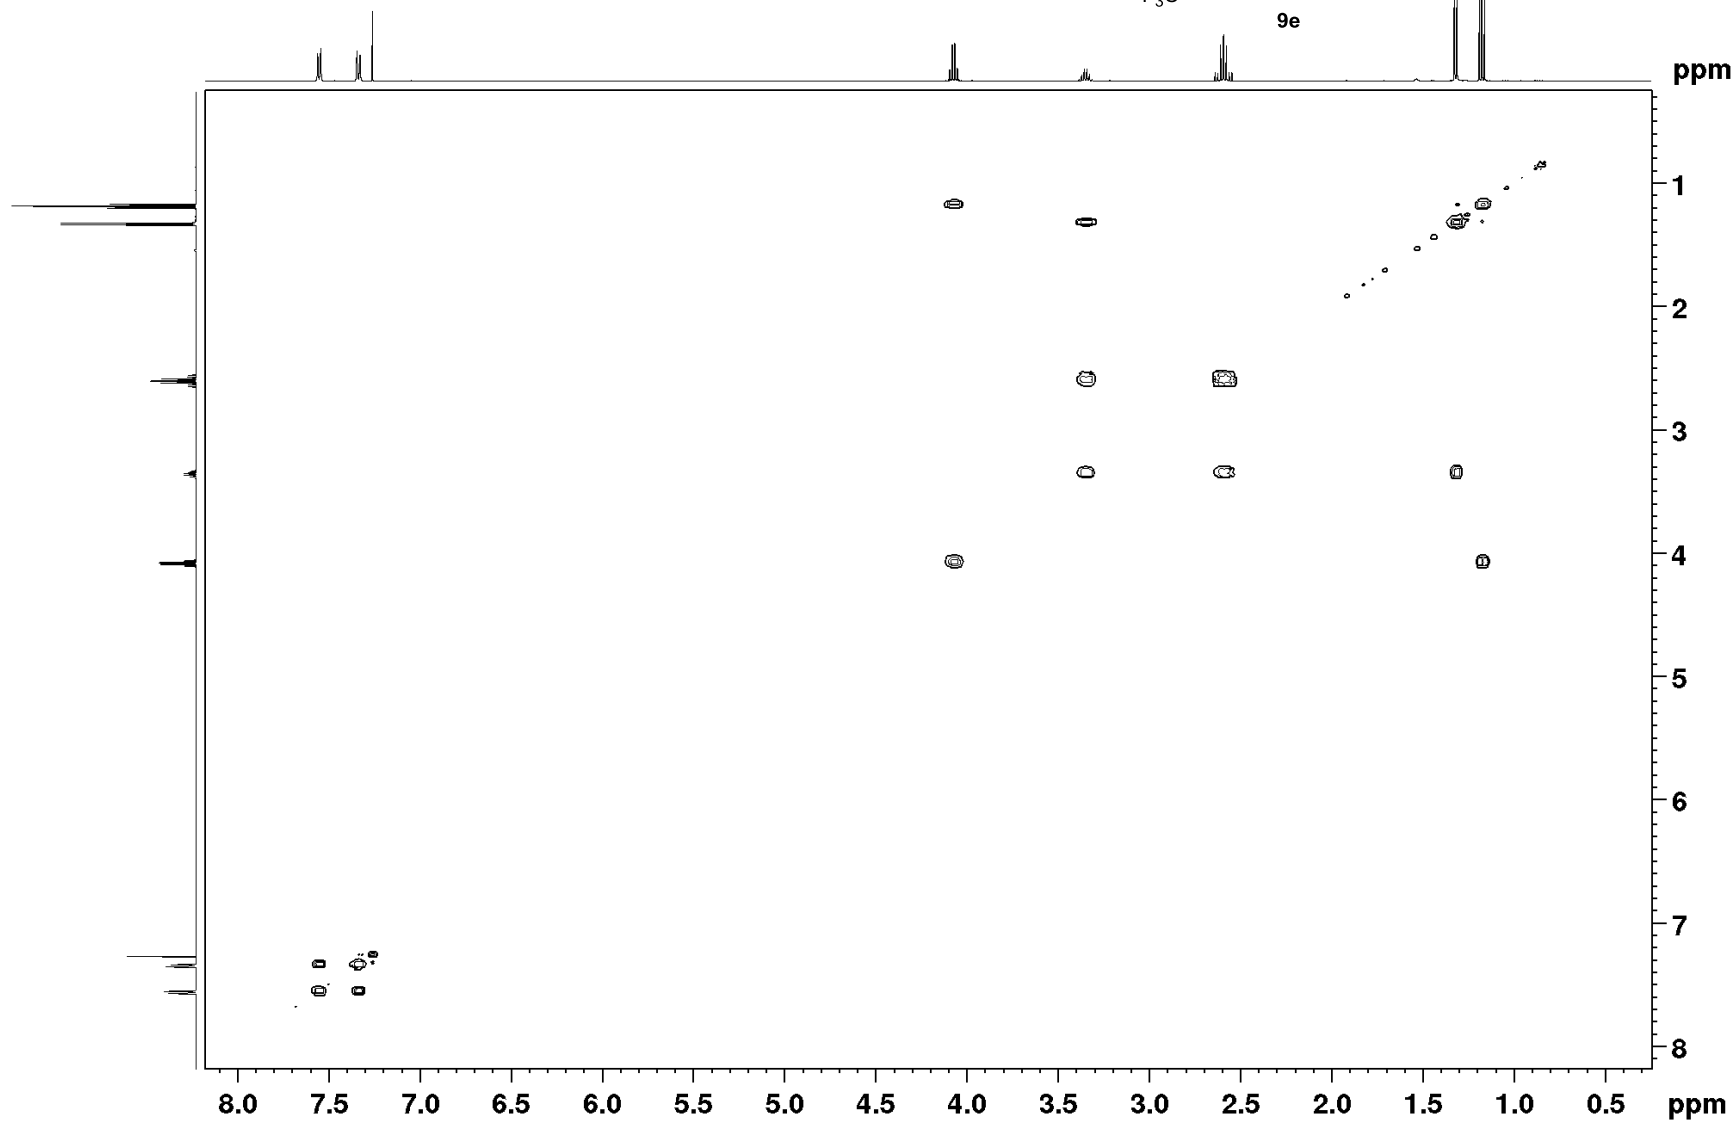

$^1\text{H}$ - $^{13}\text{C}$  HMQC

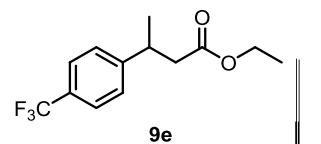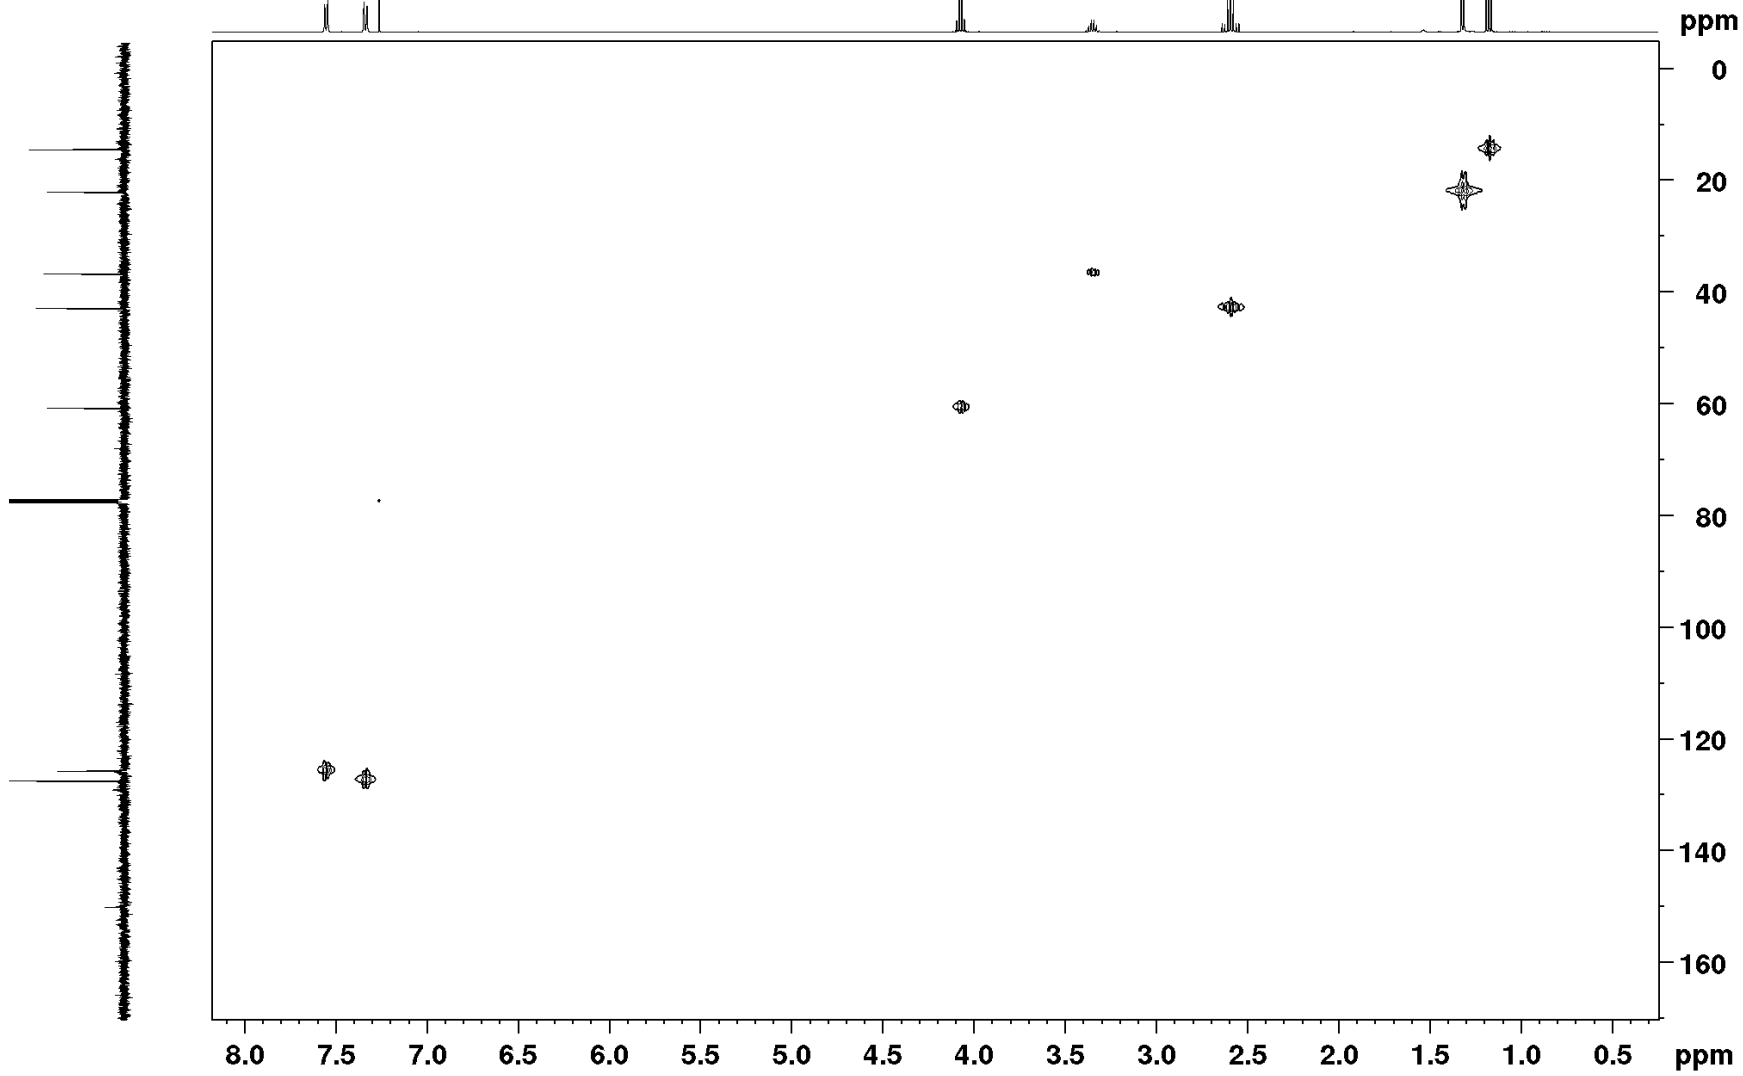

$^1\text{H}$ - $^{13}\text{C}$  HMBC

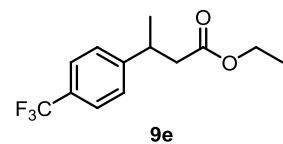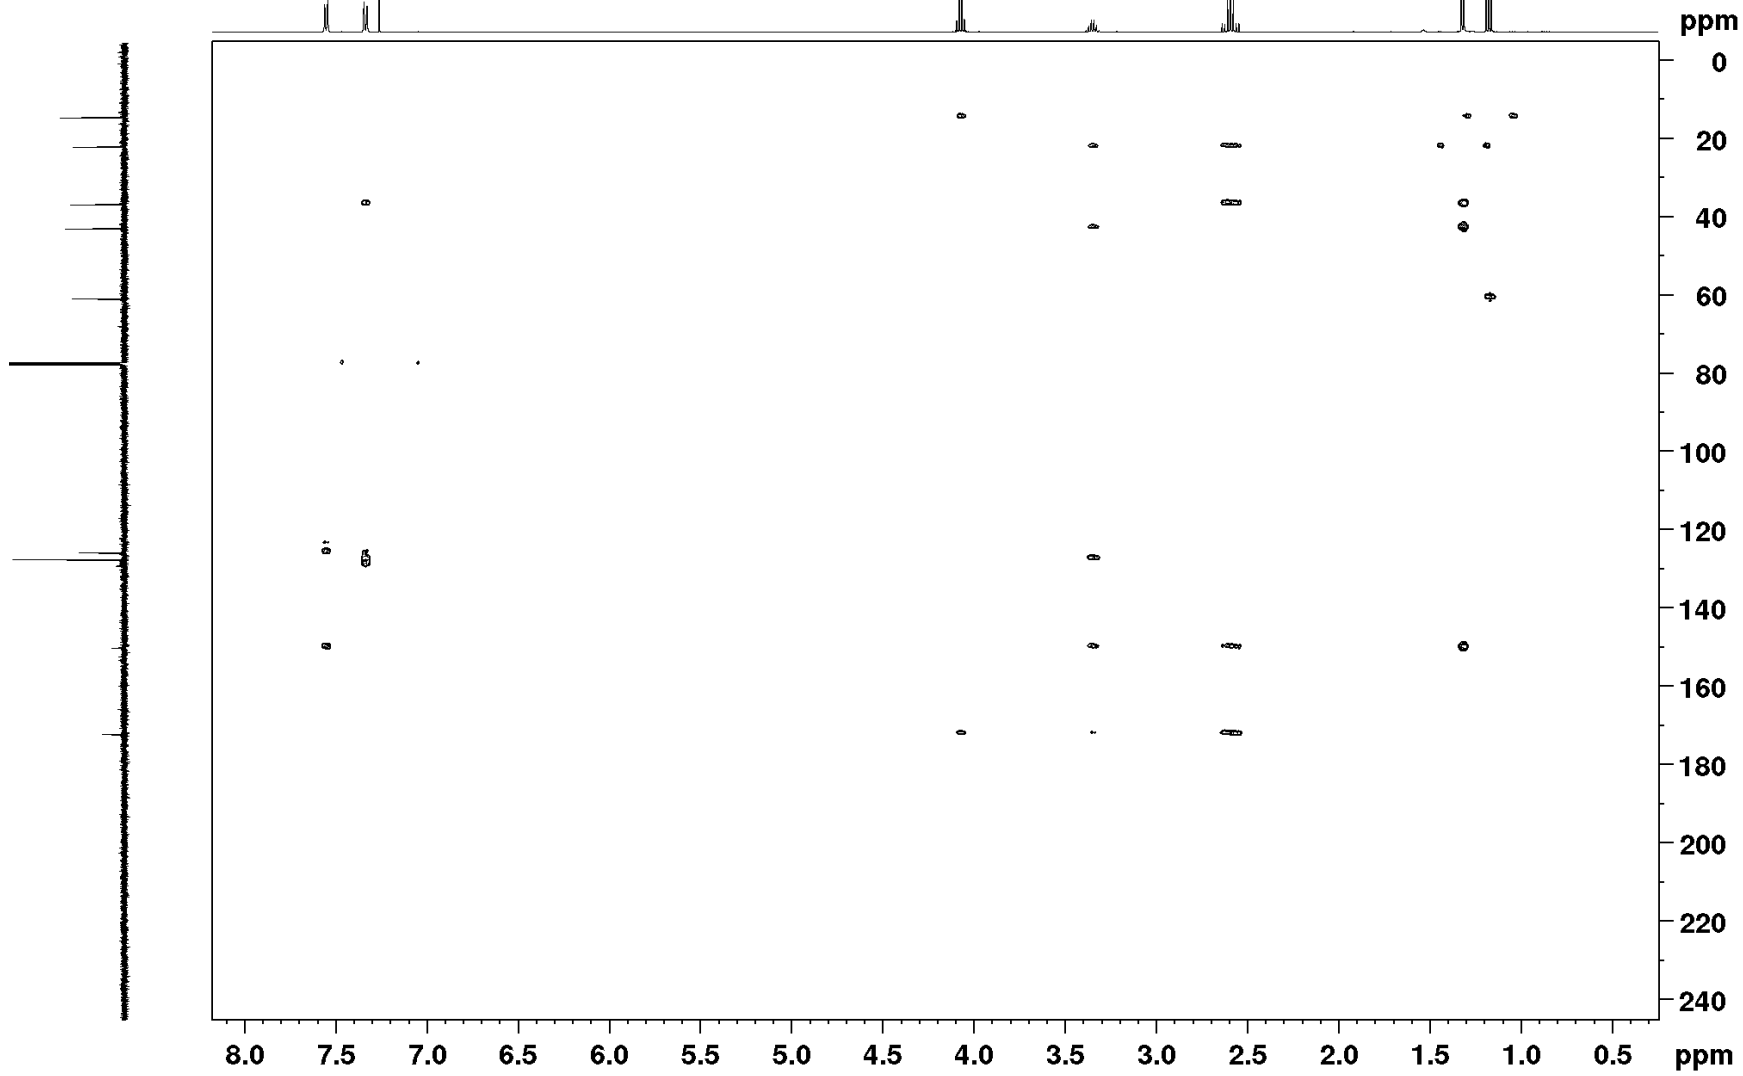

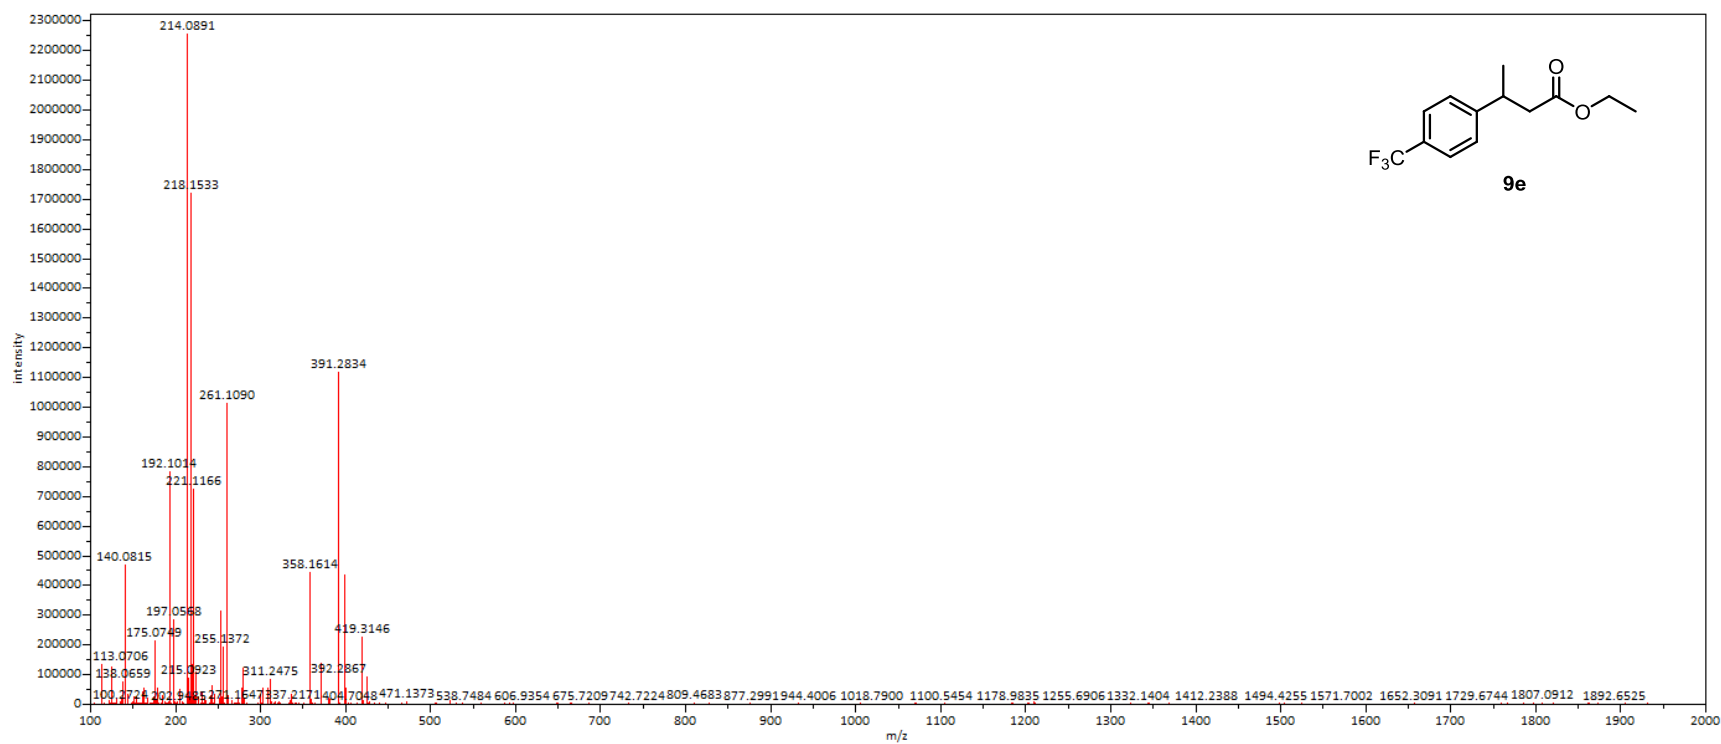



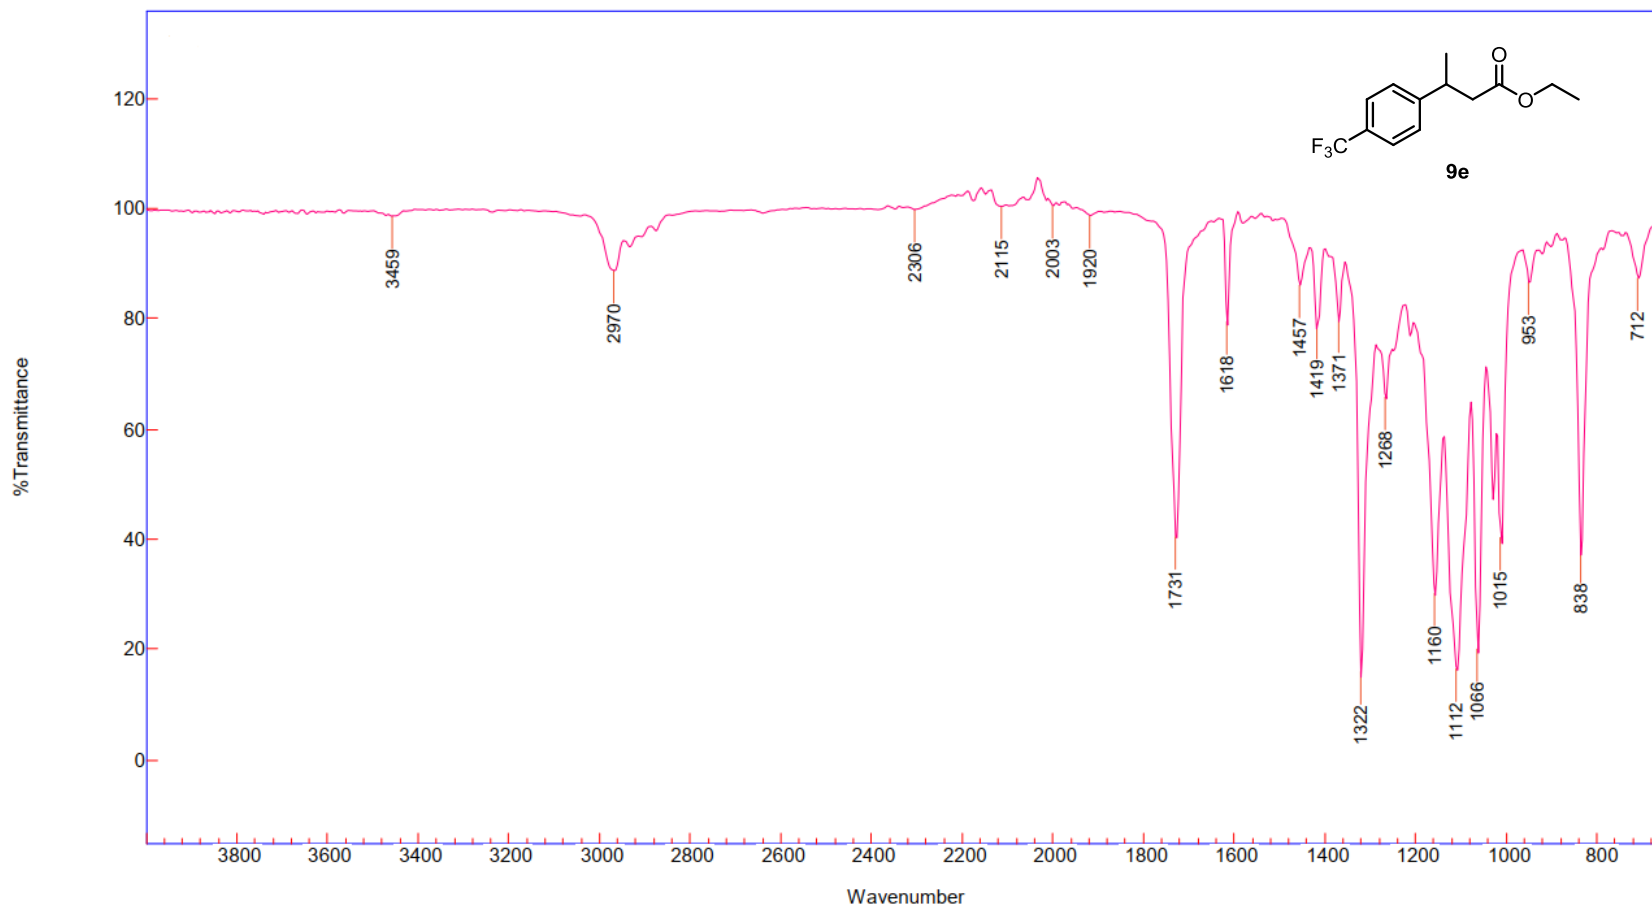

Ethyl 3-(4-bromophenyl)butanoate (9f)

<sup>1</sup>H NMR

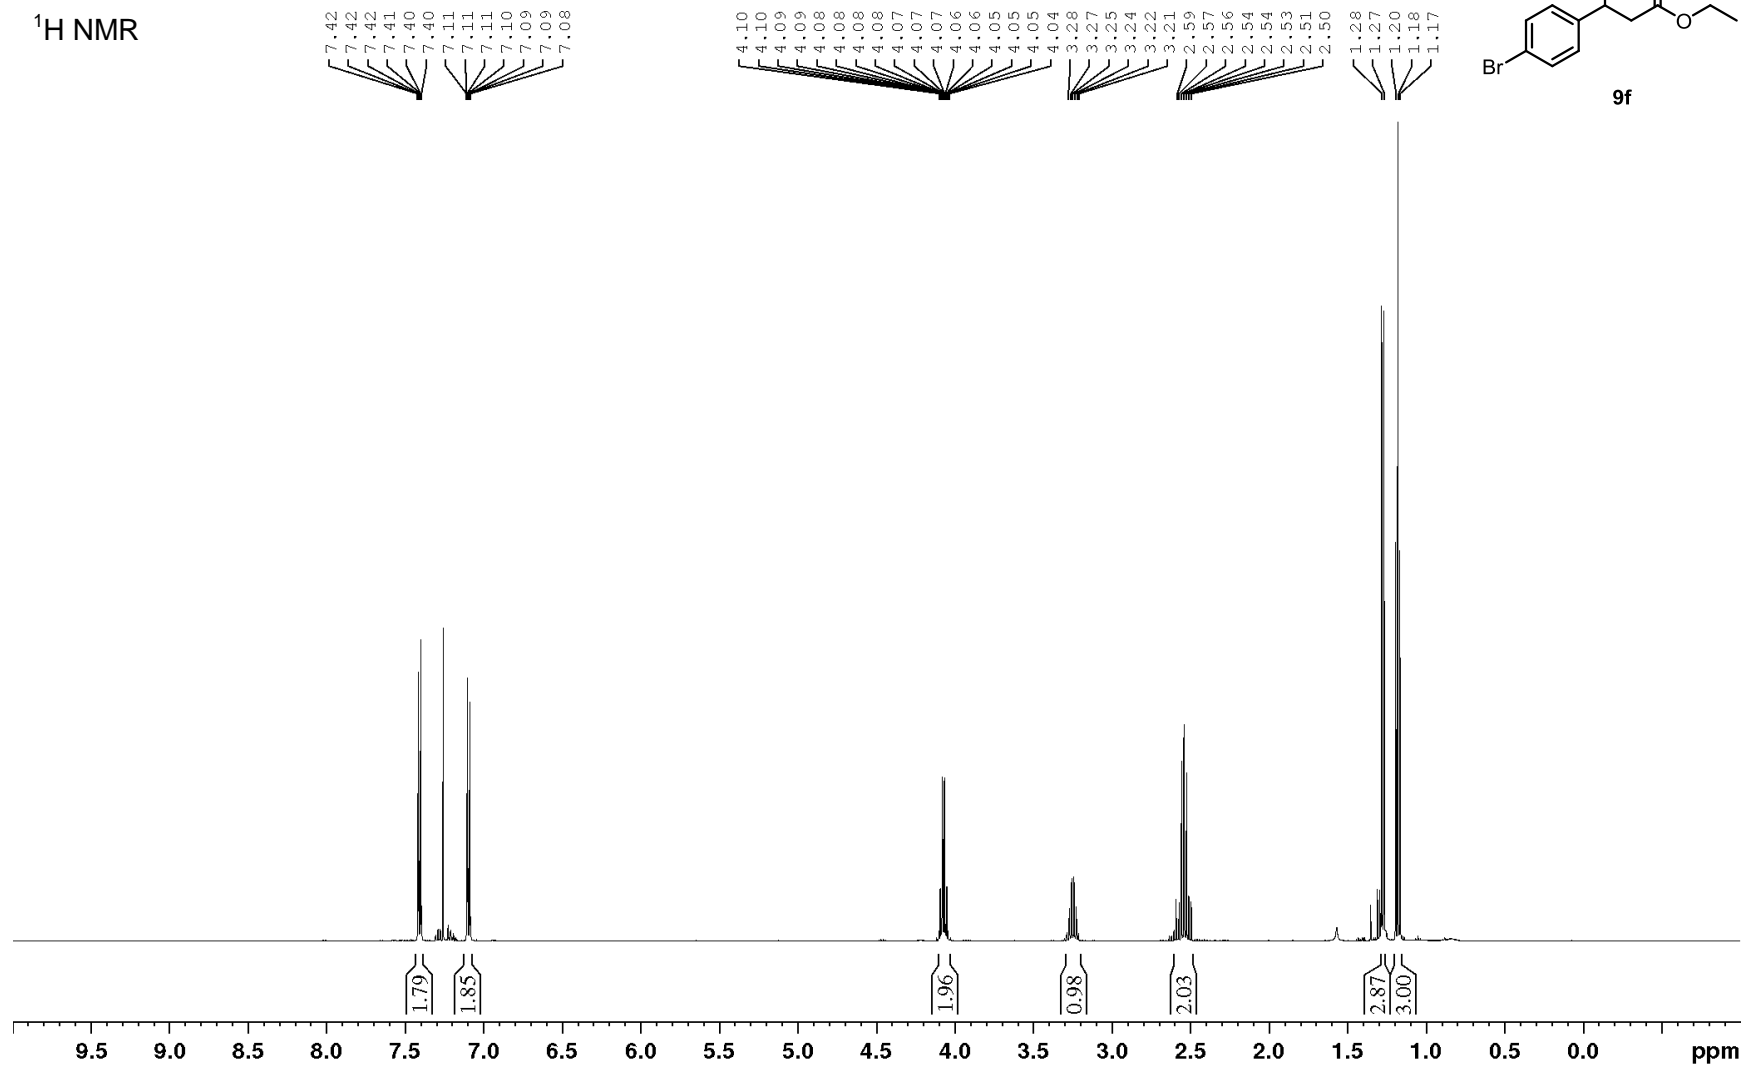

<sup>13</sup>C NMR

172.2

144.8

131.7

128.7

120.2

60.5

42.9

36.1

21.9

14.3

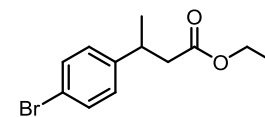

9f

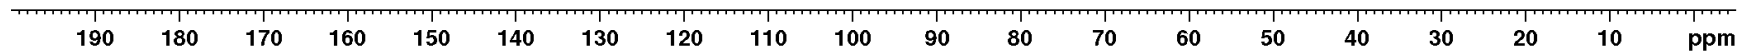

<sup>13</sup>C DEPT NMR

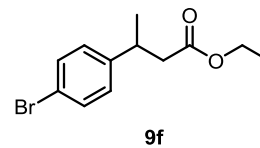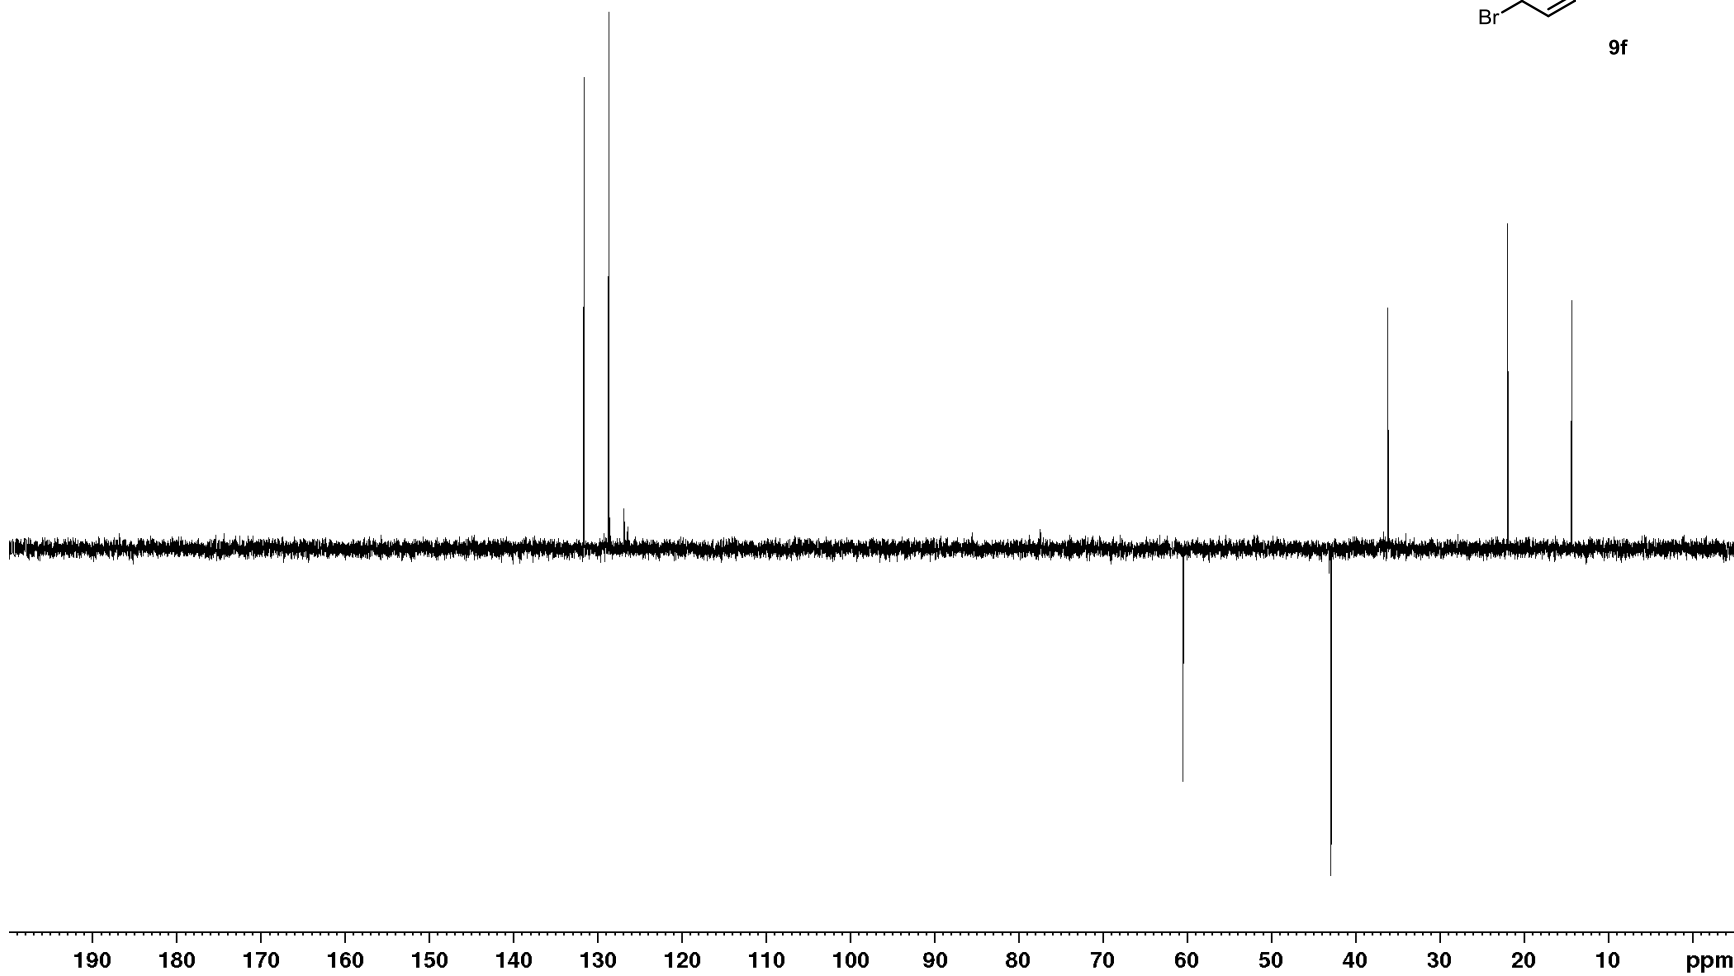

$^1\text{H}$ - $^1\text{H}$  COSY

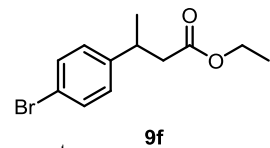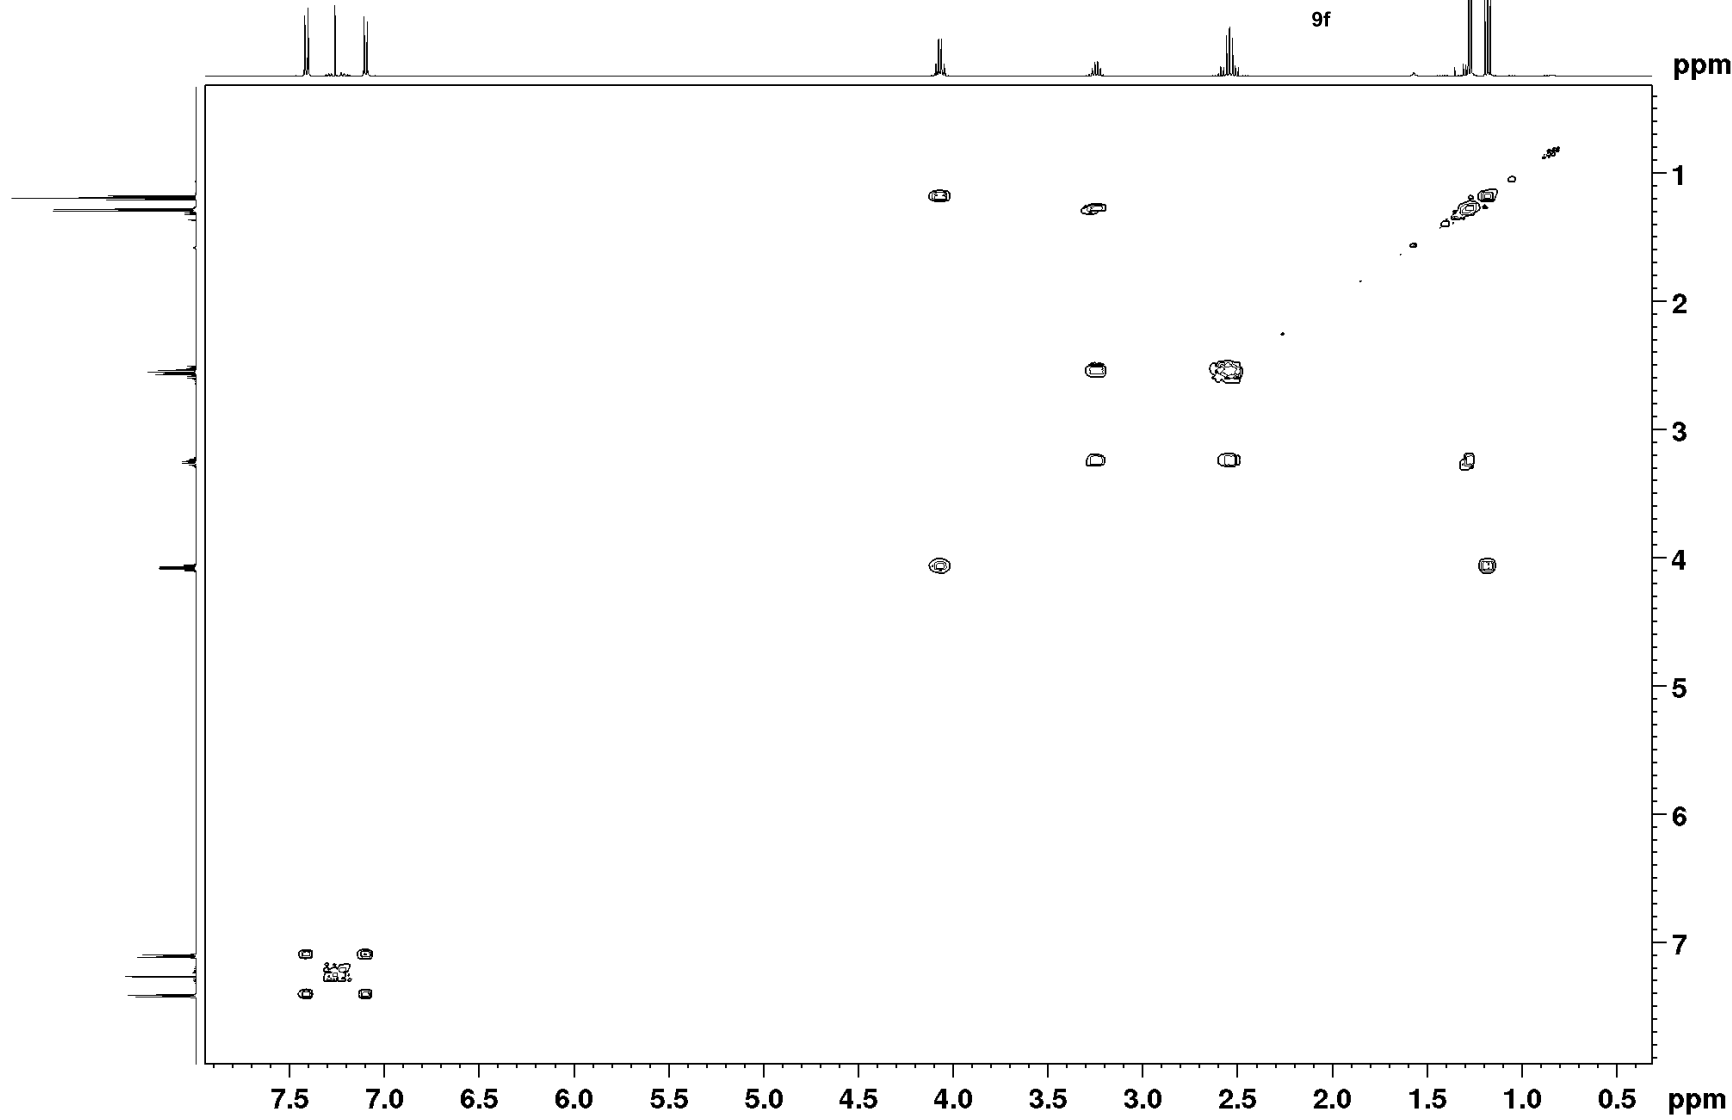

$^1\text{H}$ - $^{13}\text{C}$  HMQC

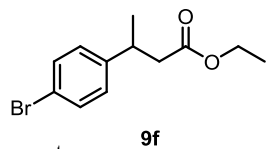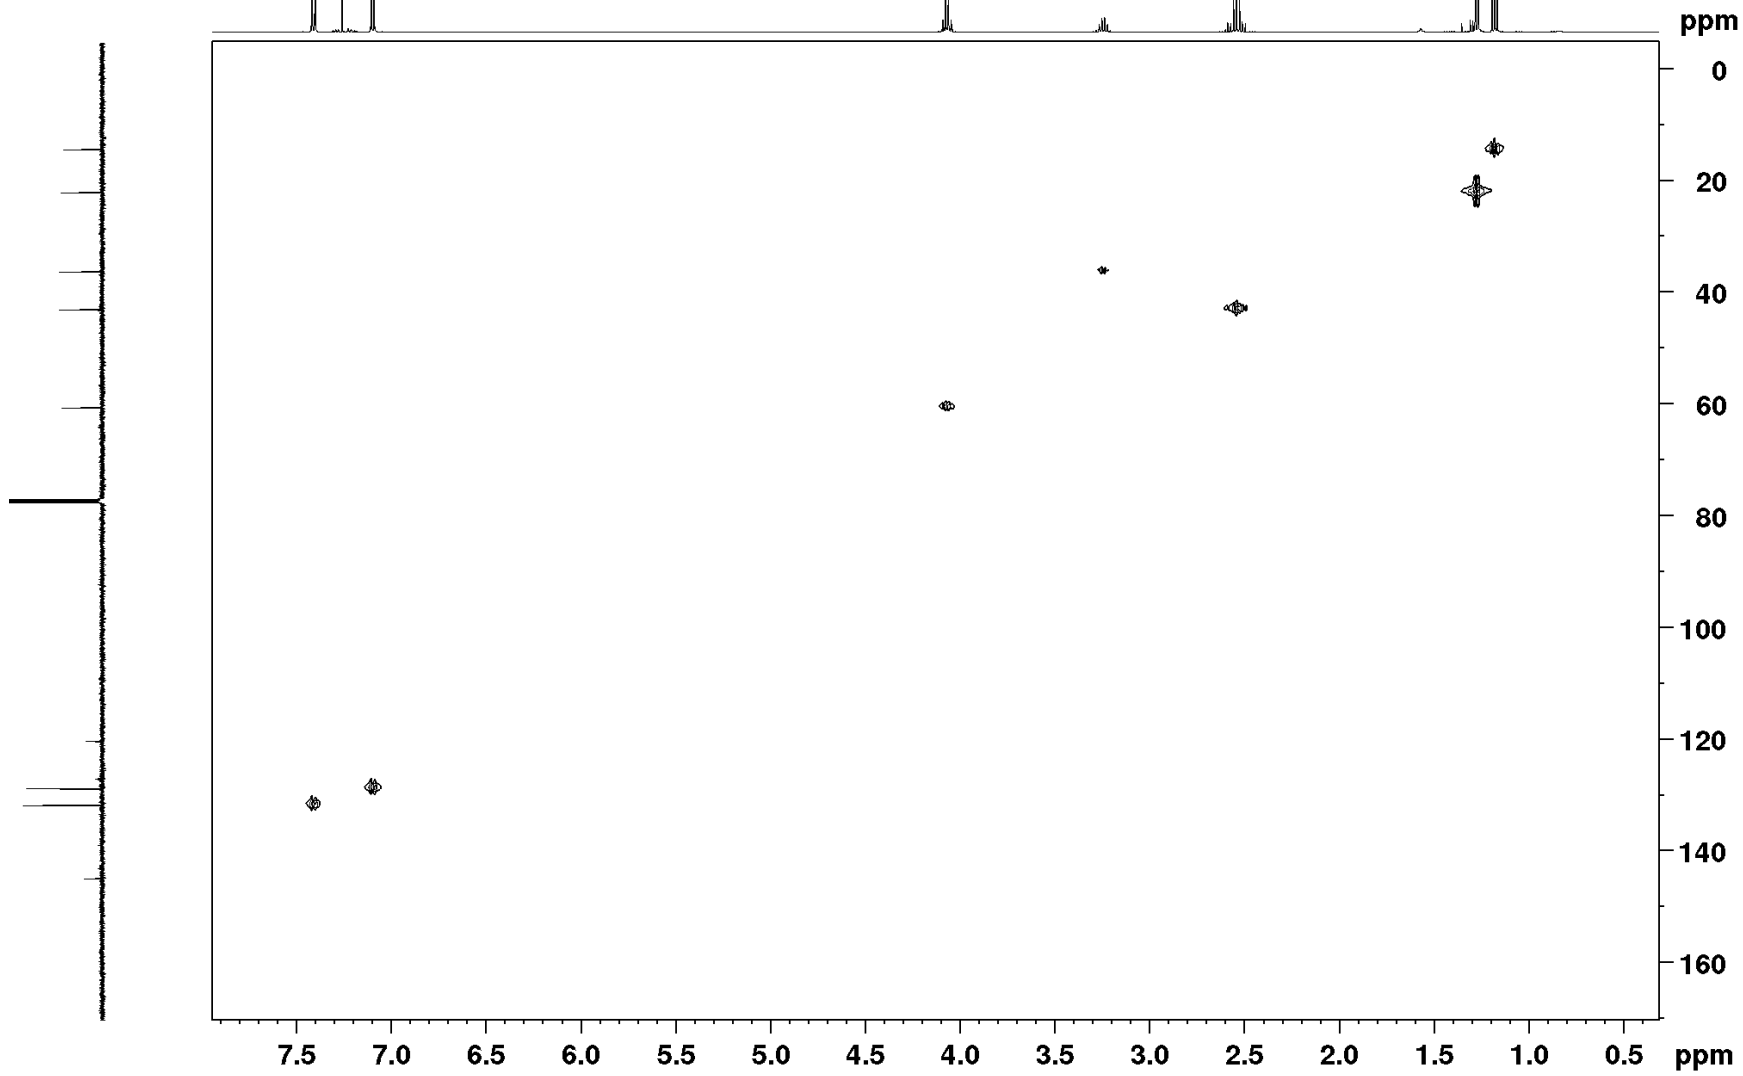

$^1\text{H}$ - $^{13}\text{C}$  HMBC

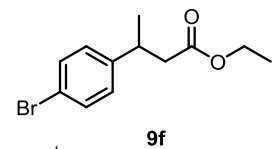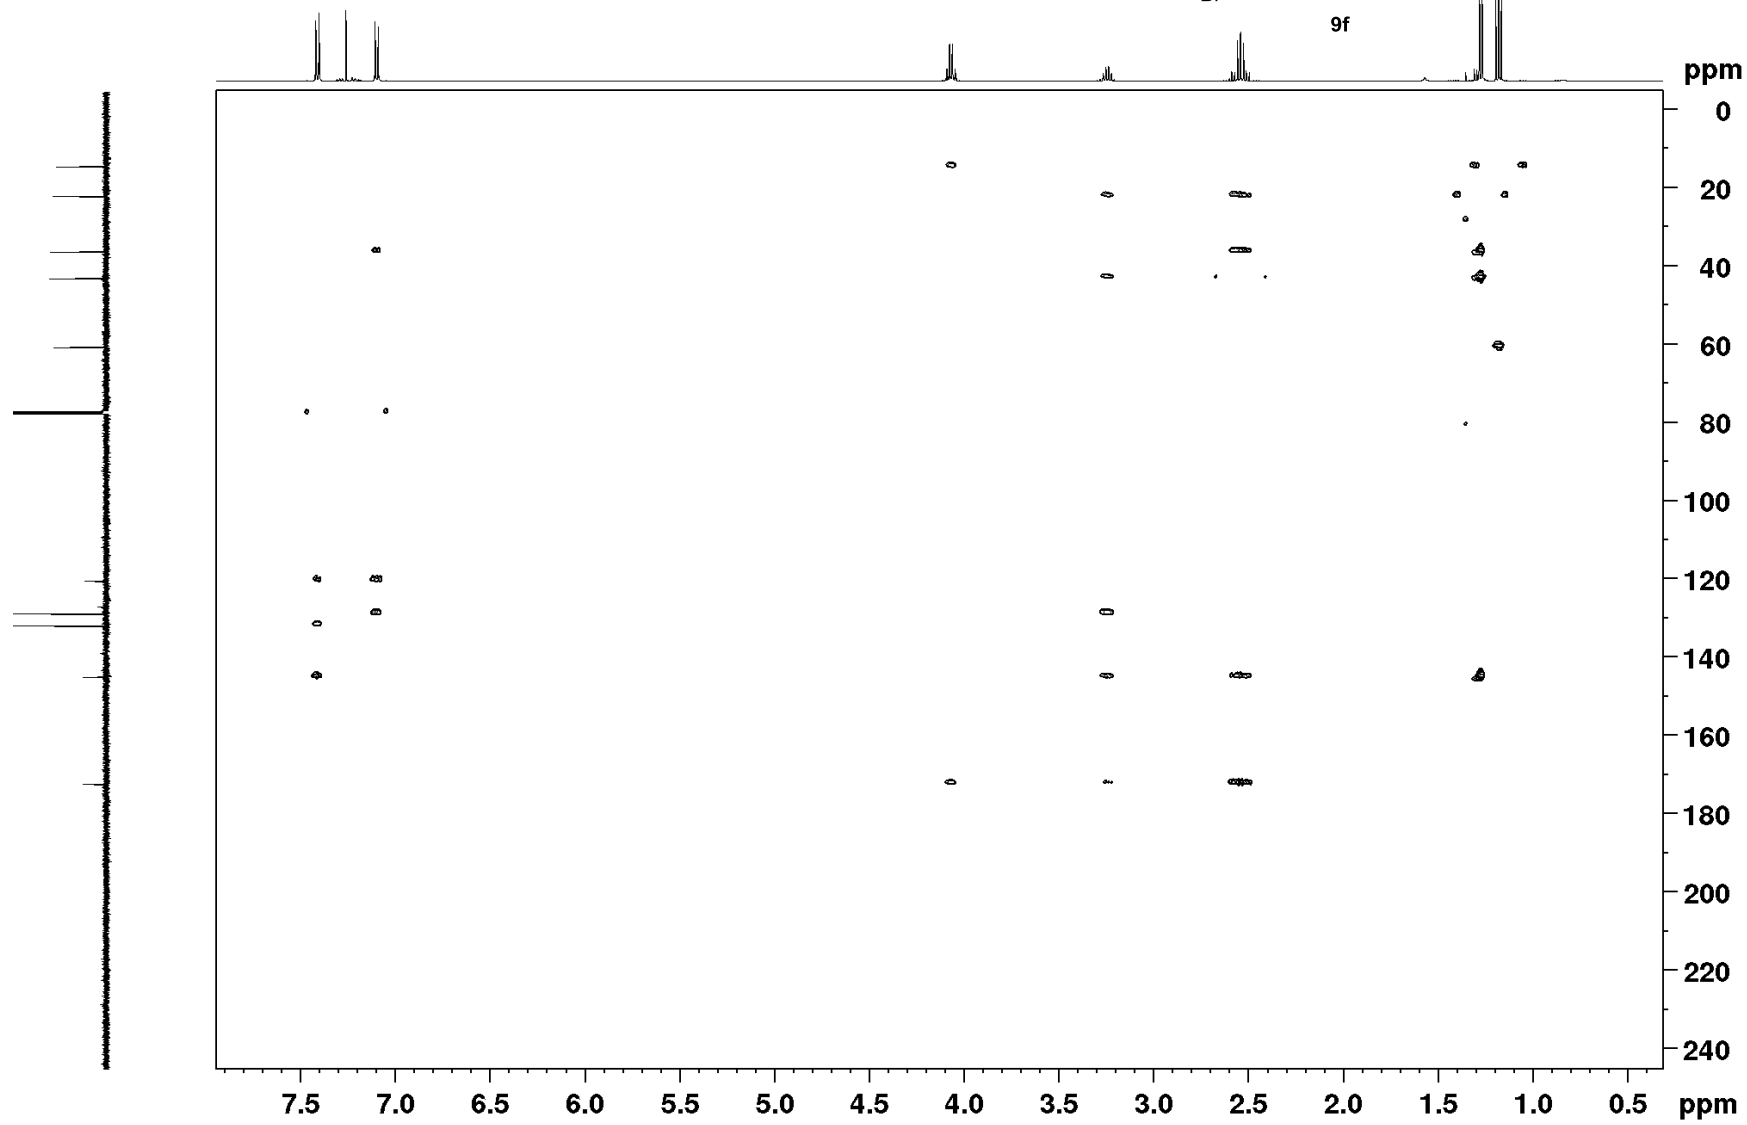

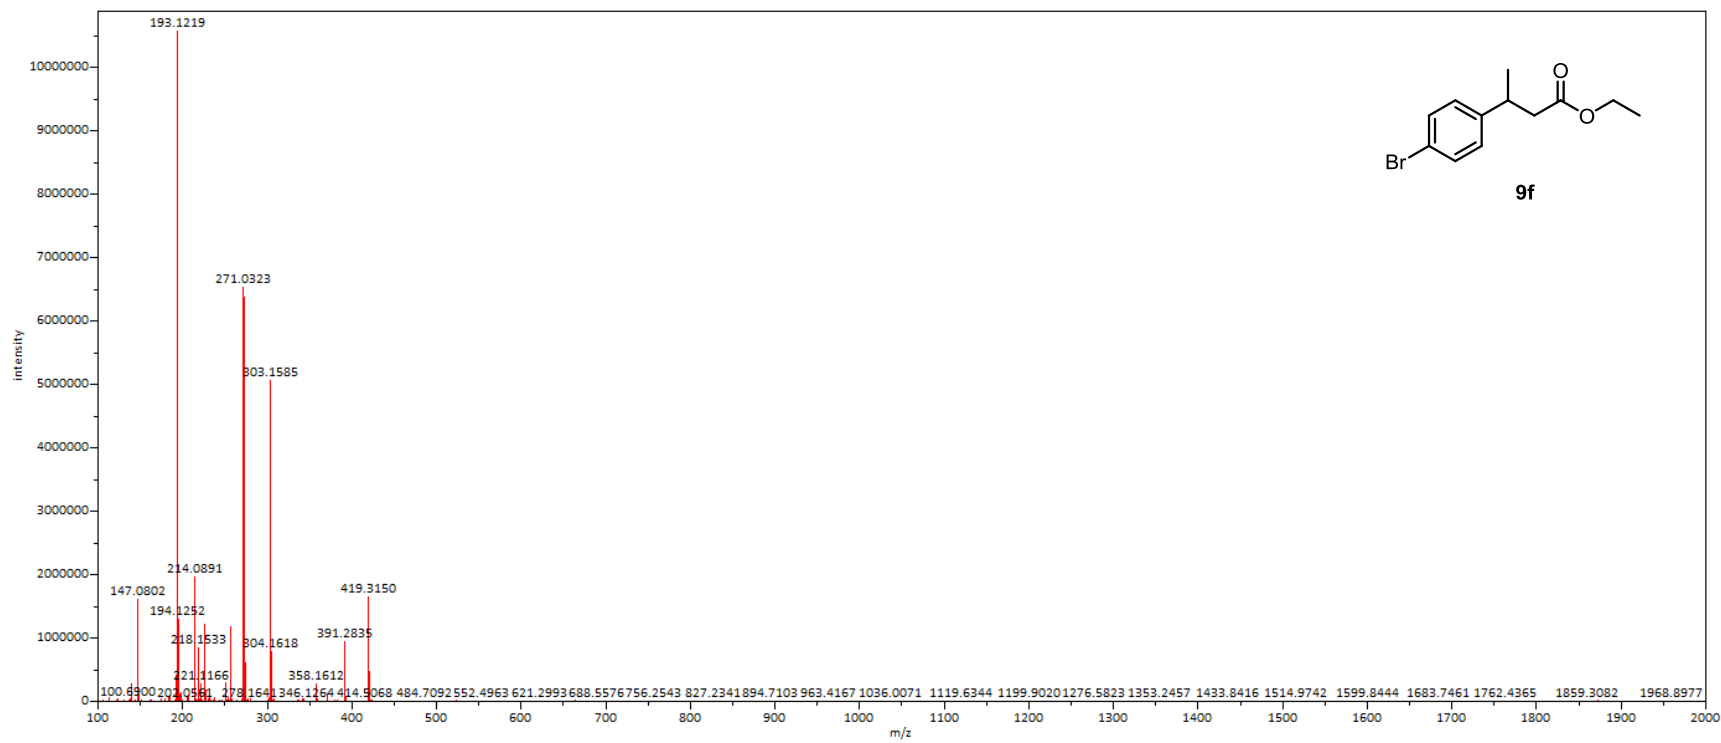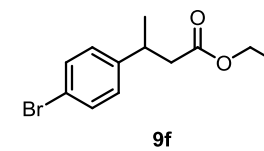



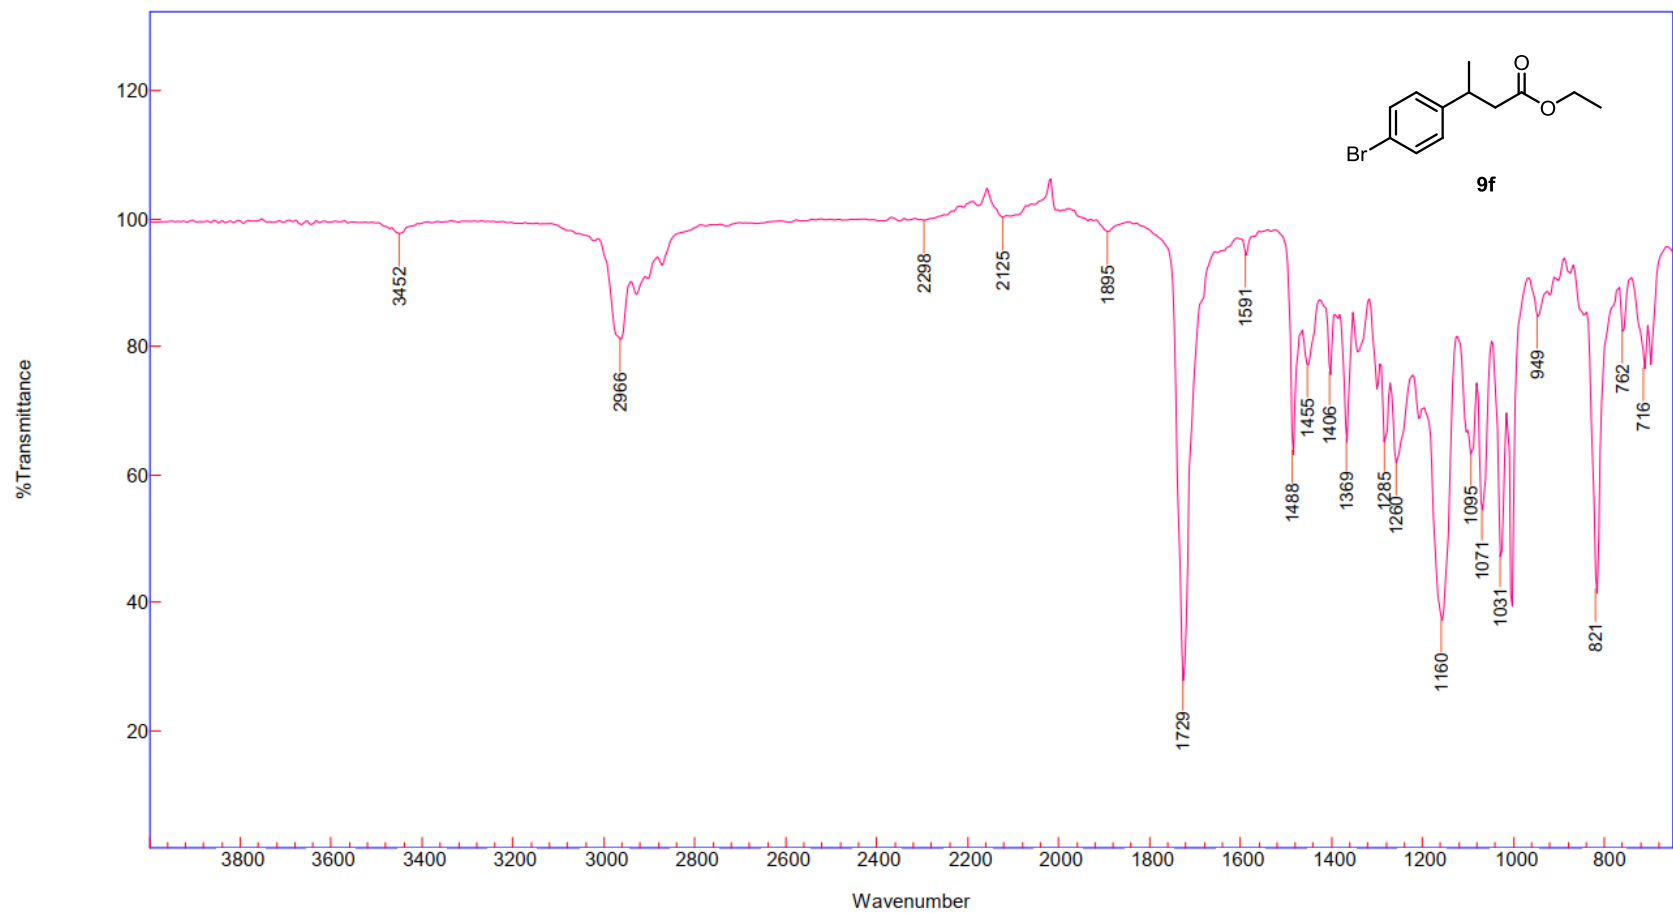

**Ethyl 3-(4-chlorophenyl)butanoate (9g)**

<sup>1</sup>H NMR

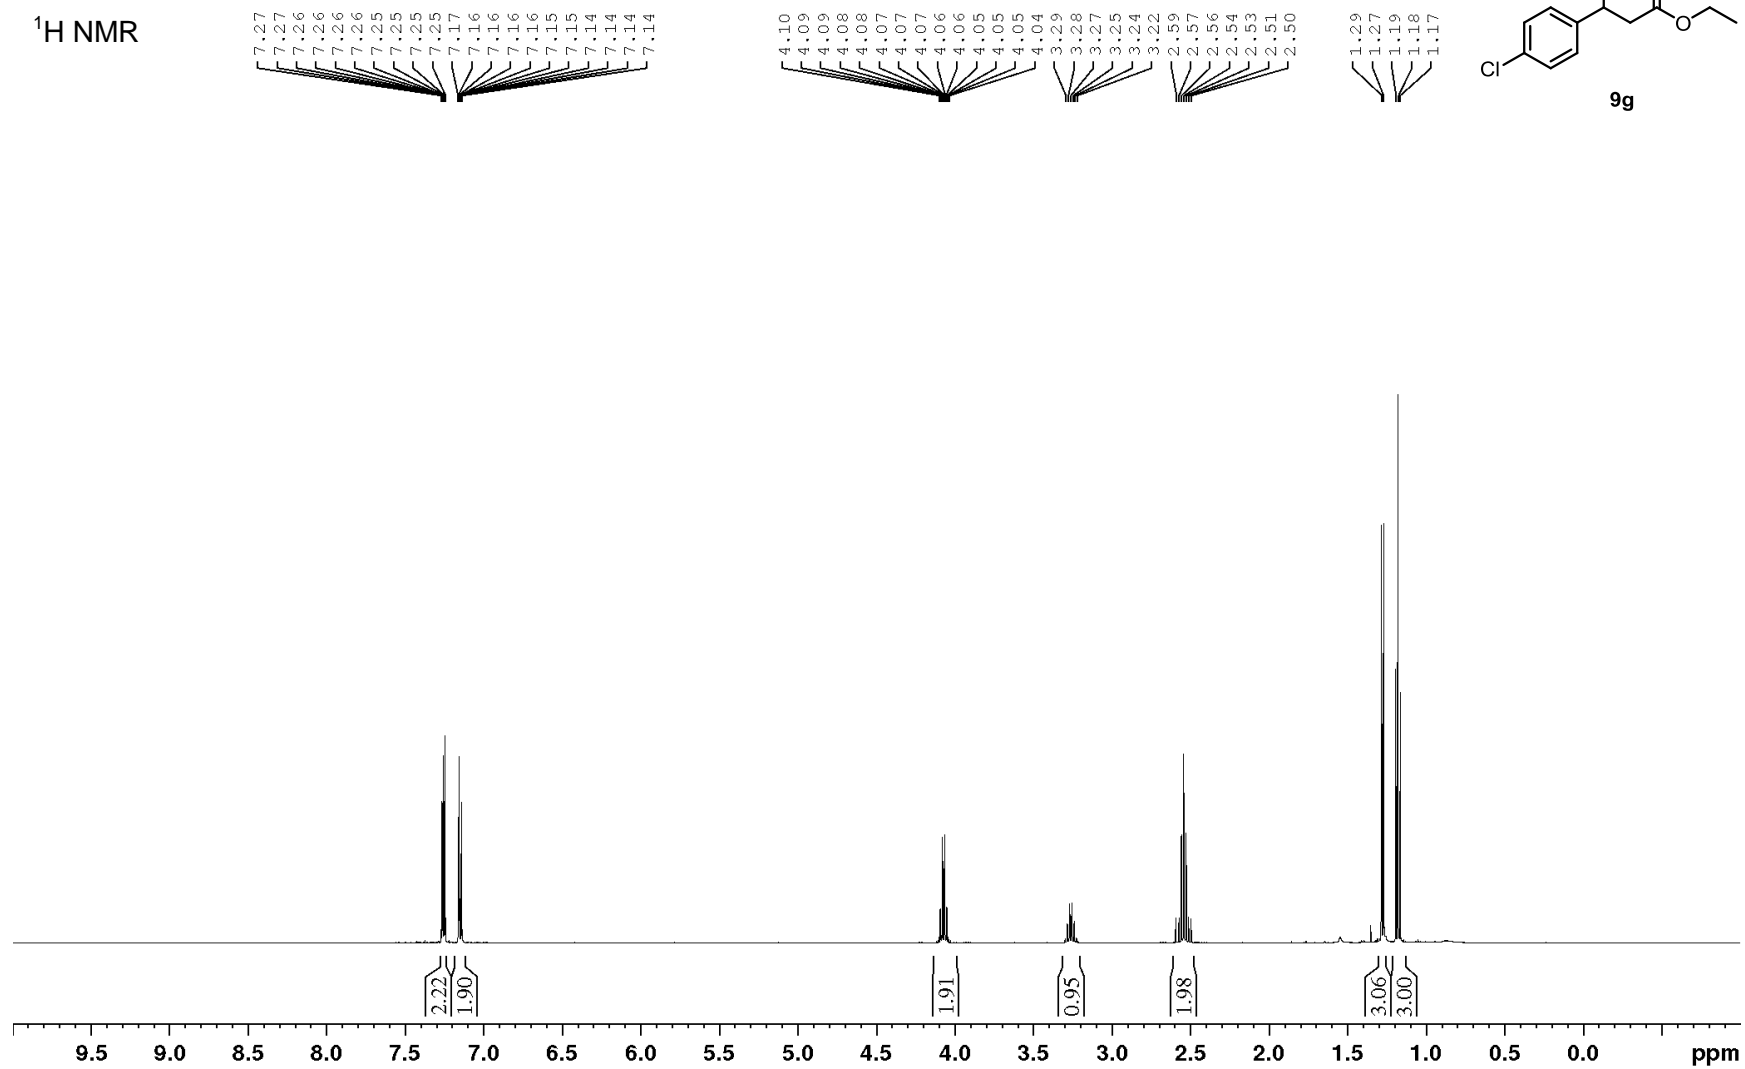

<sup>13</sup>C NMR

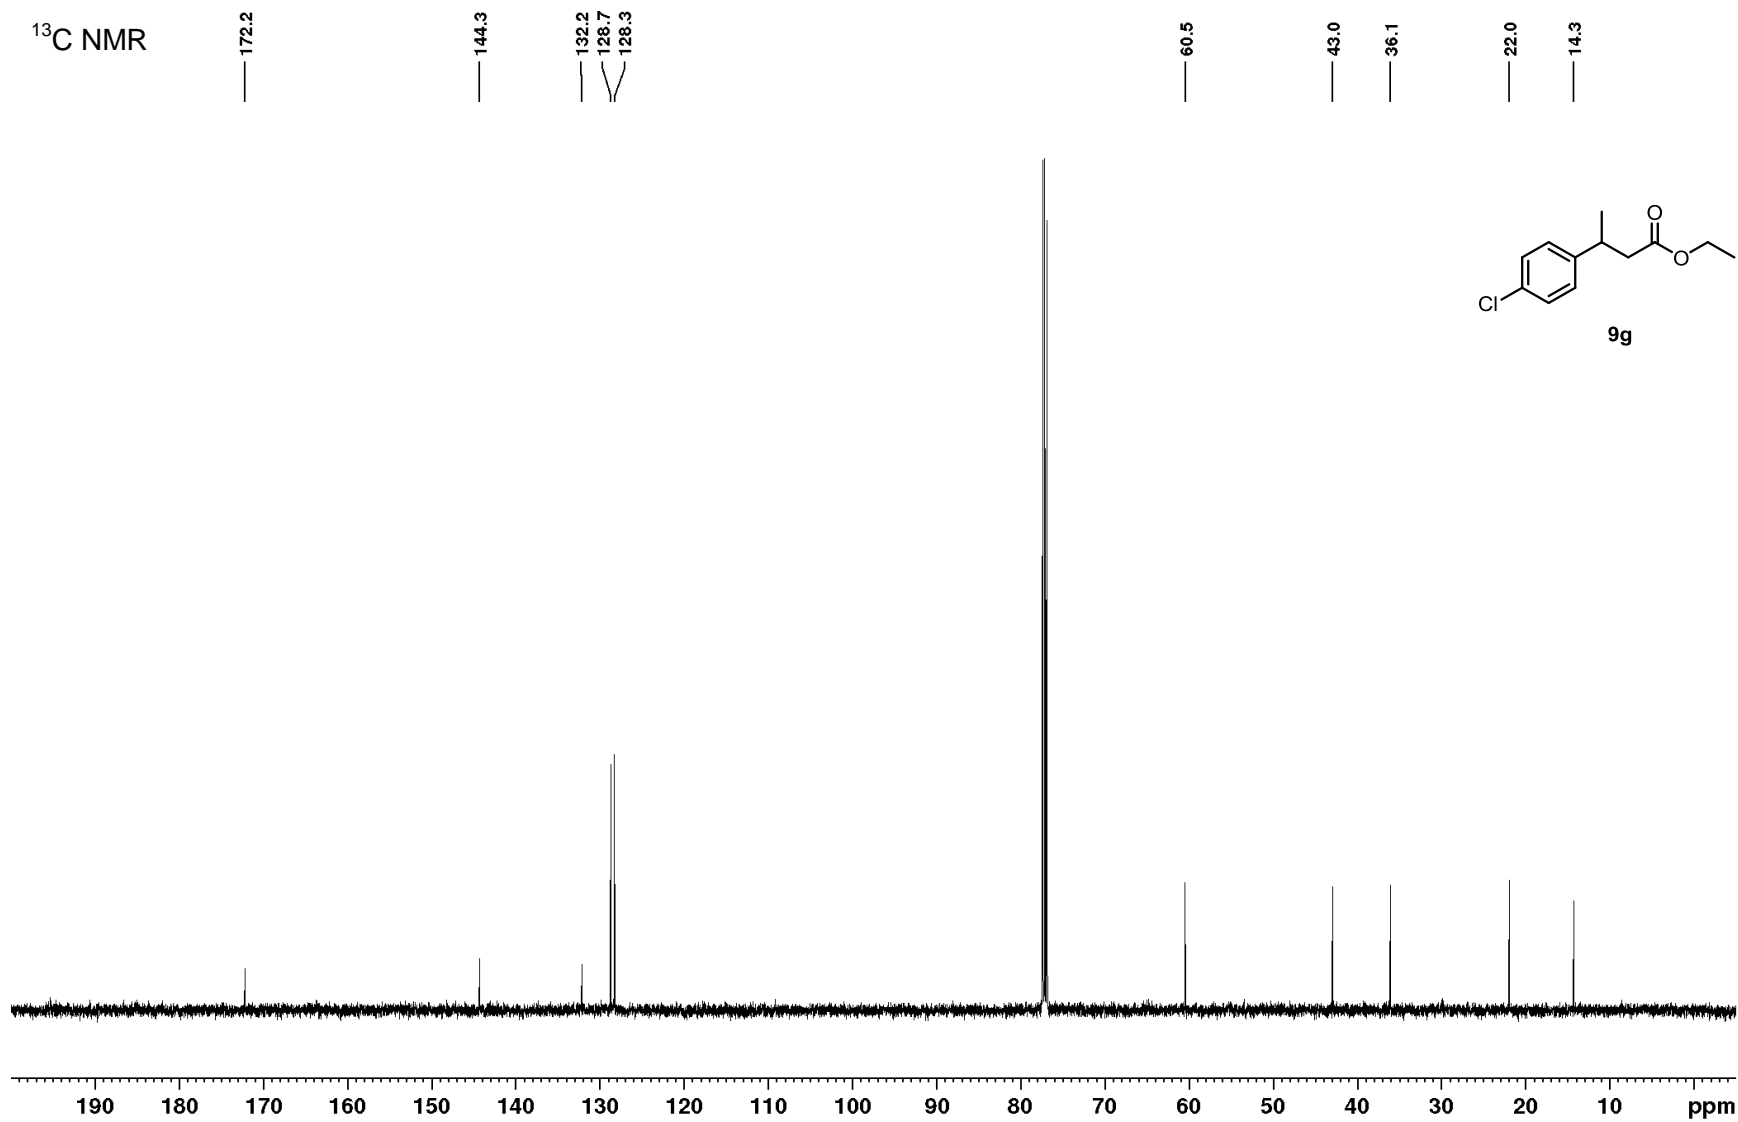

<sup>13</sup>C DEPT NMR

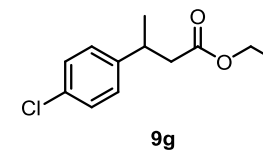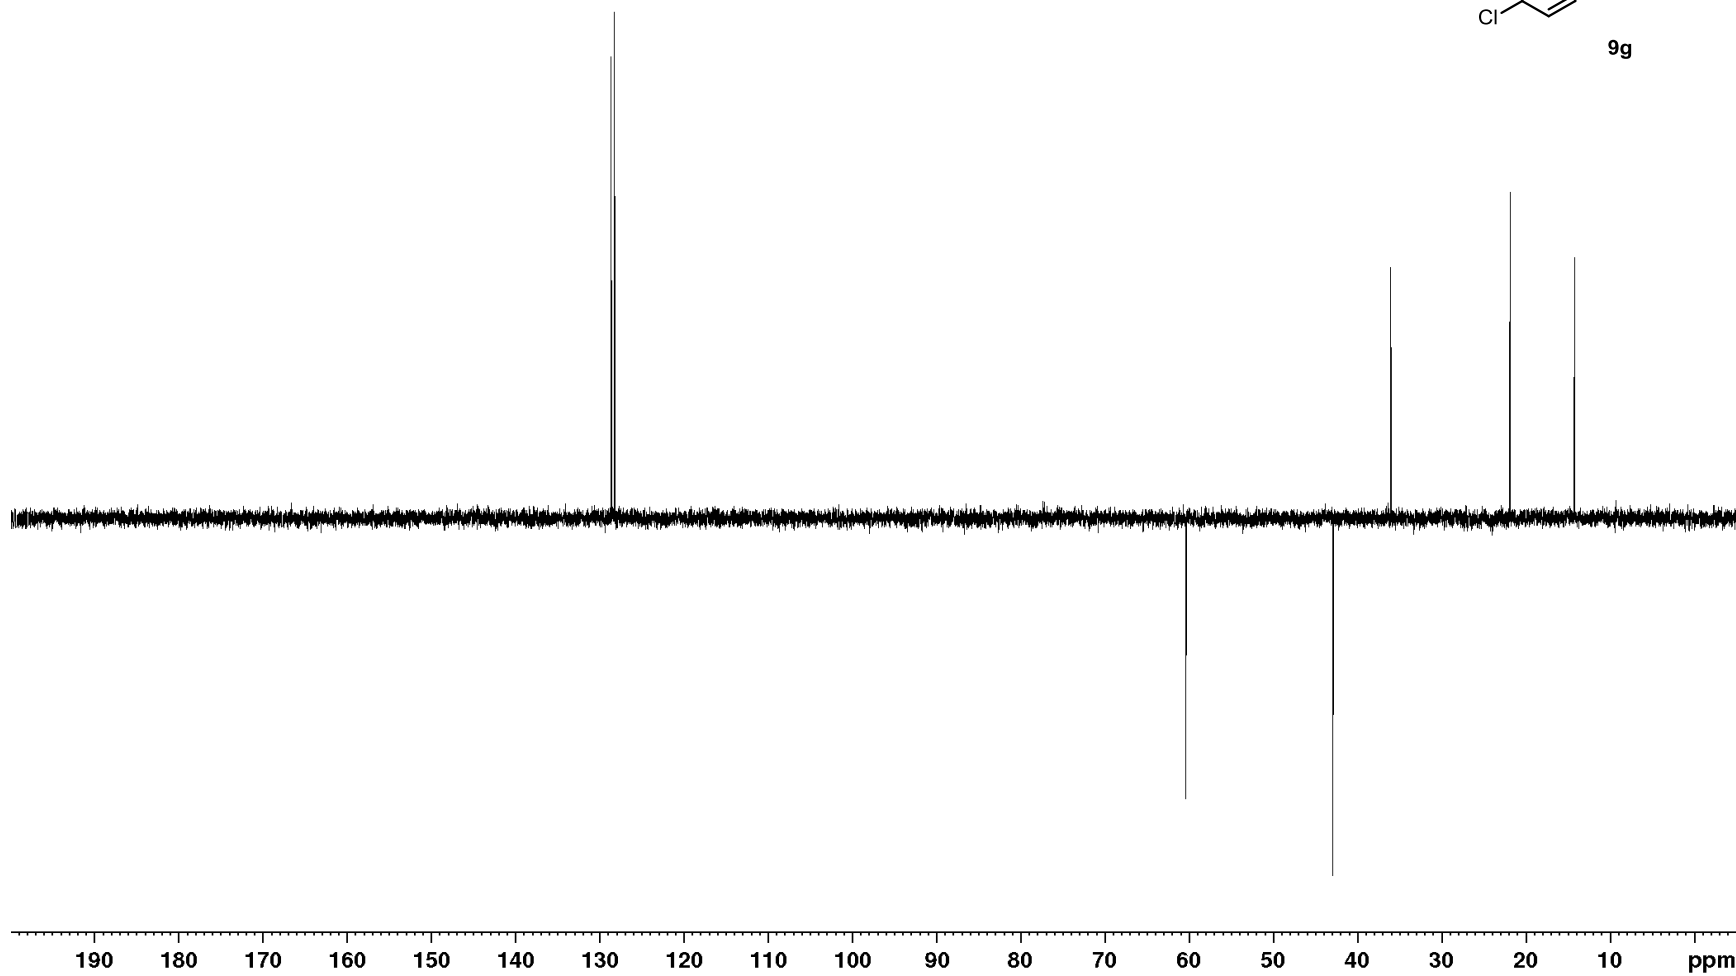

$^1\text{H}$ - $^1\text{H}$  COSY

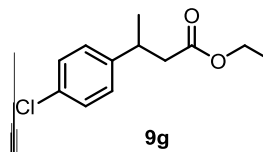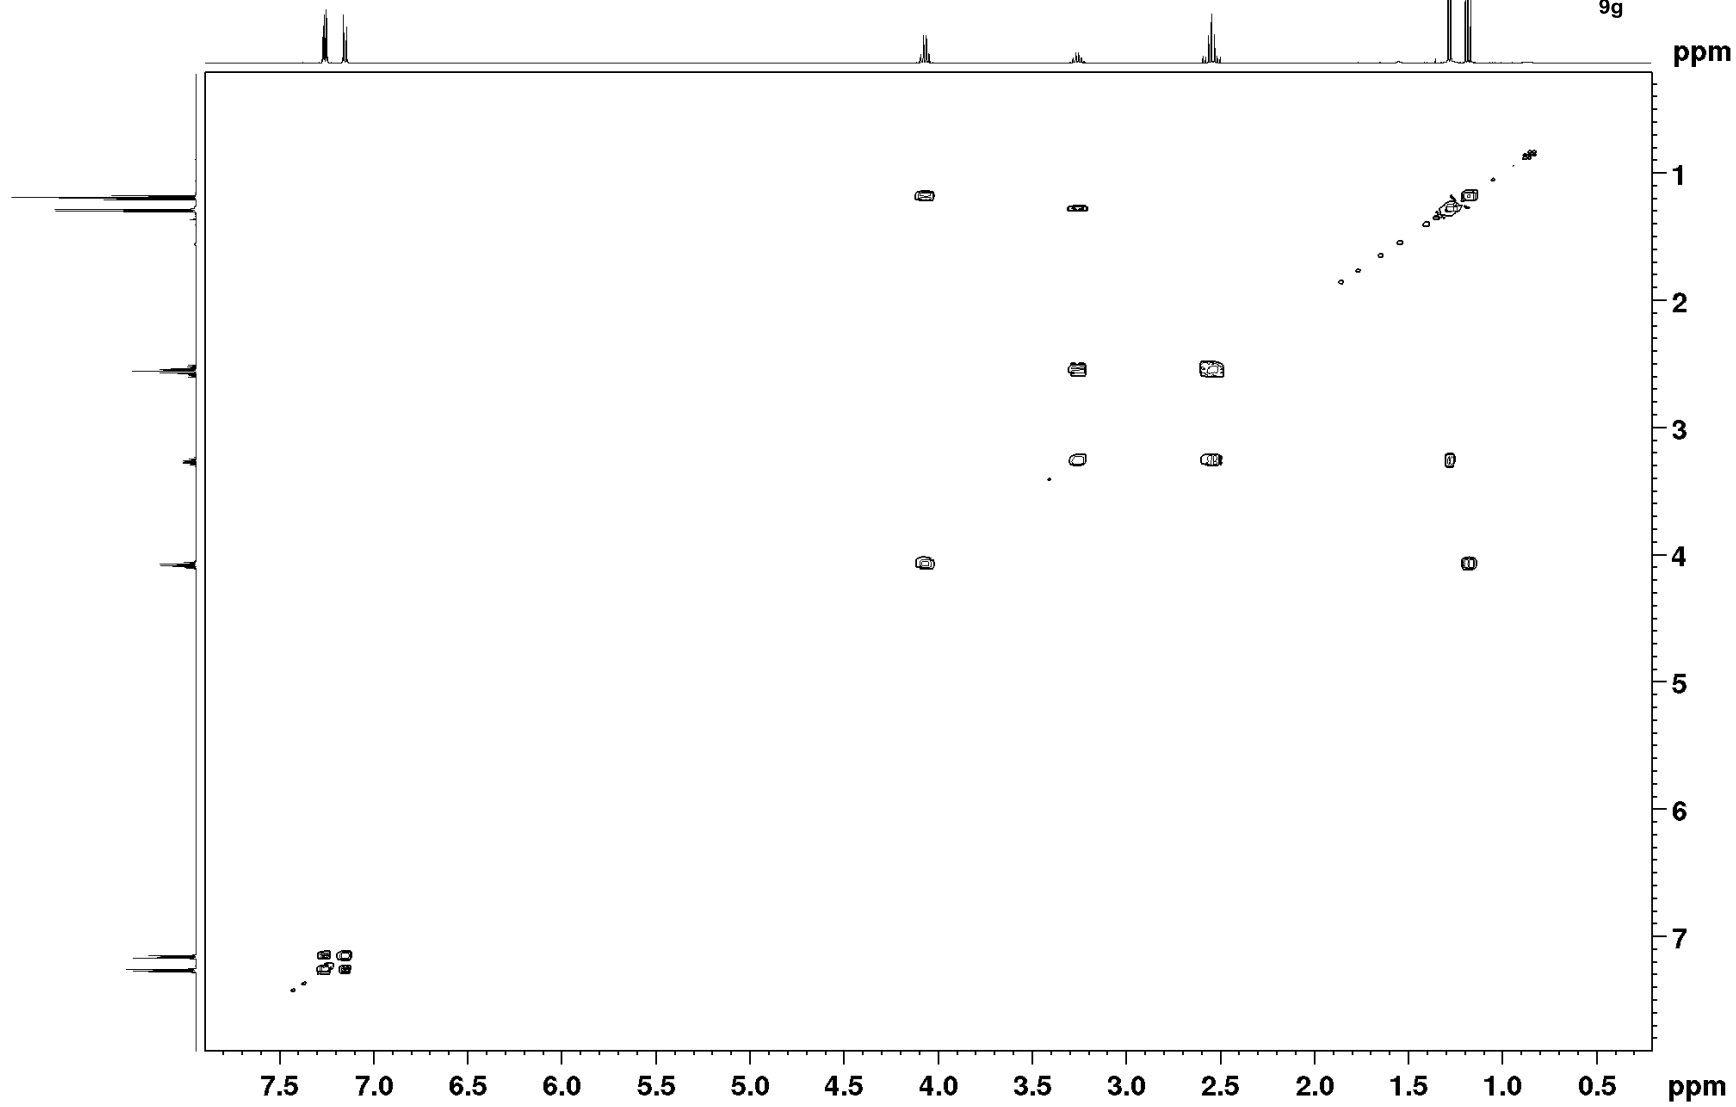

$^1\text{H}$ - $^{13}\text{C}$  HMQC

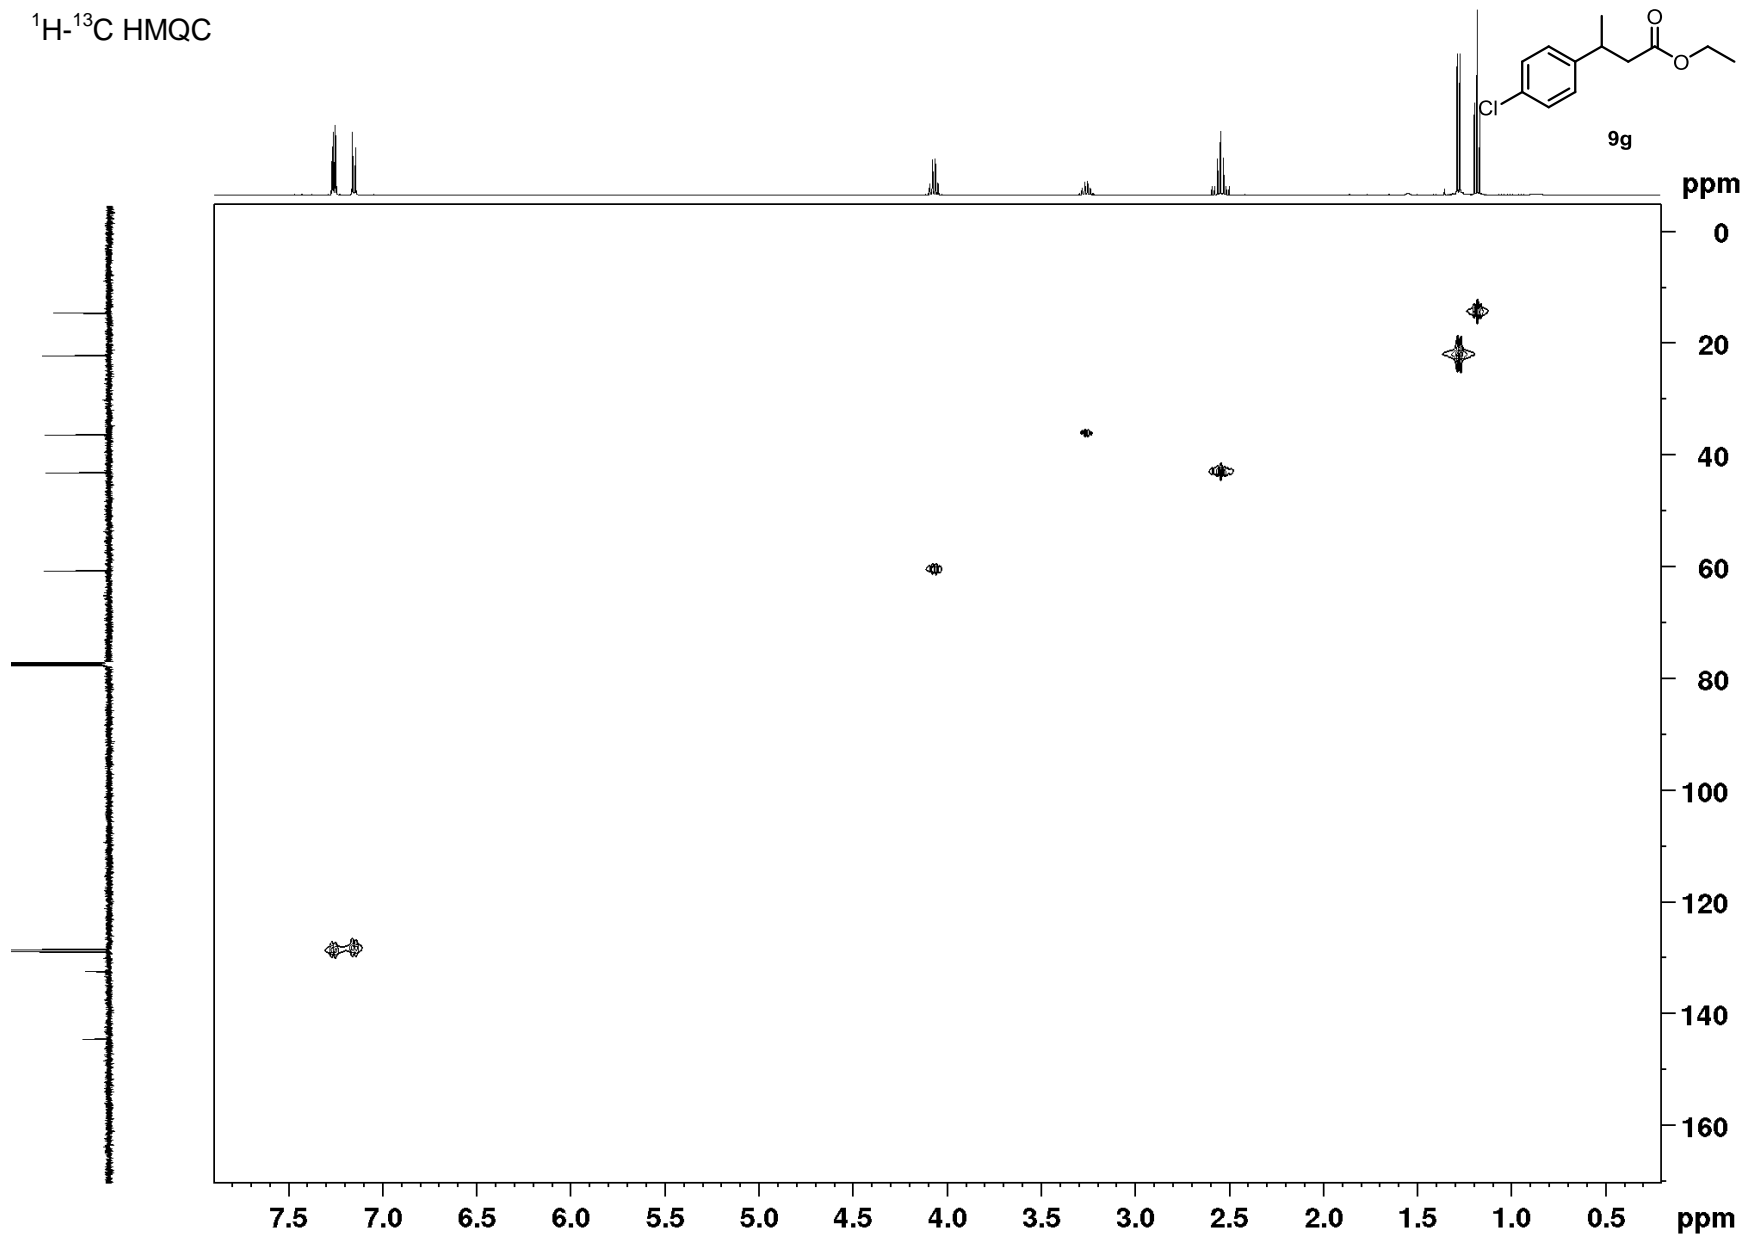

$^1\text{H}$ - $^{13}\text{C}$  HMBC

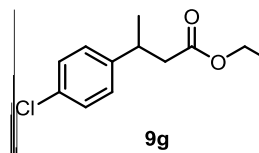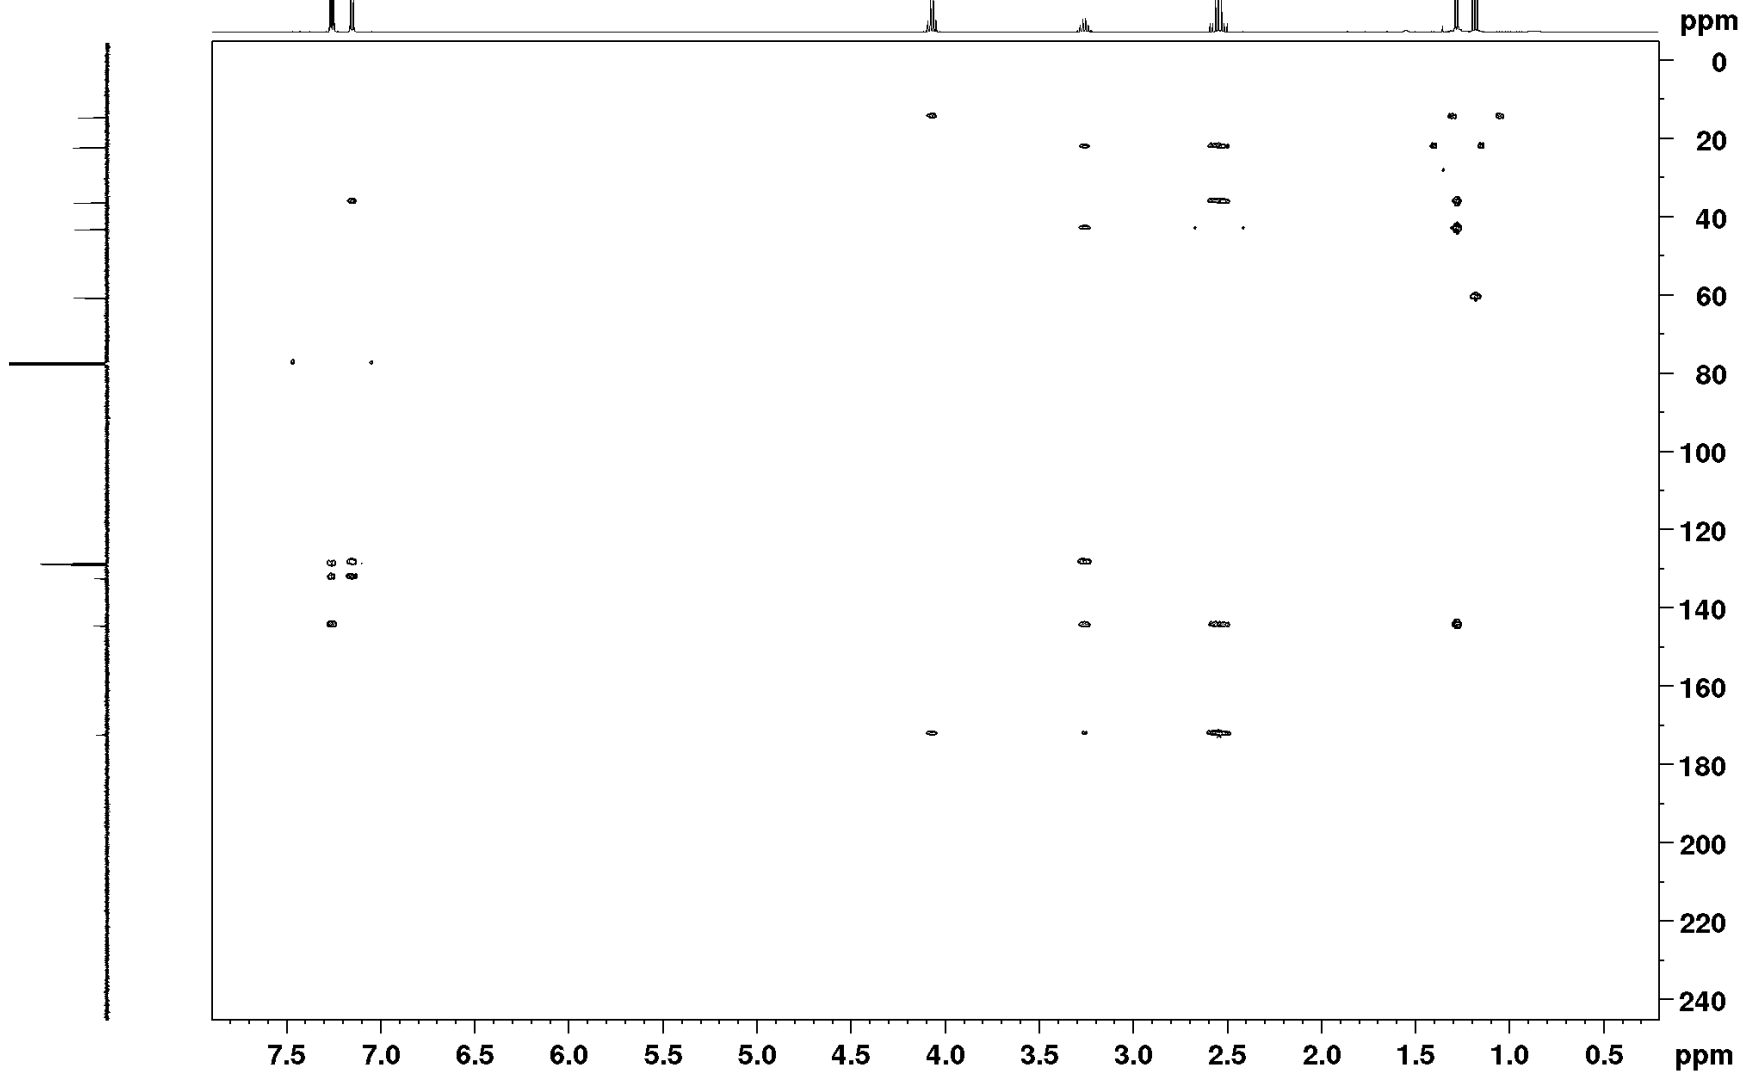

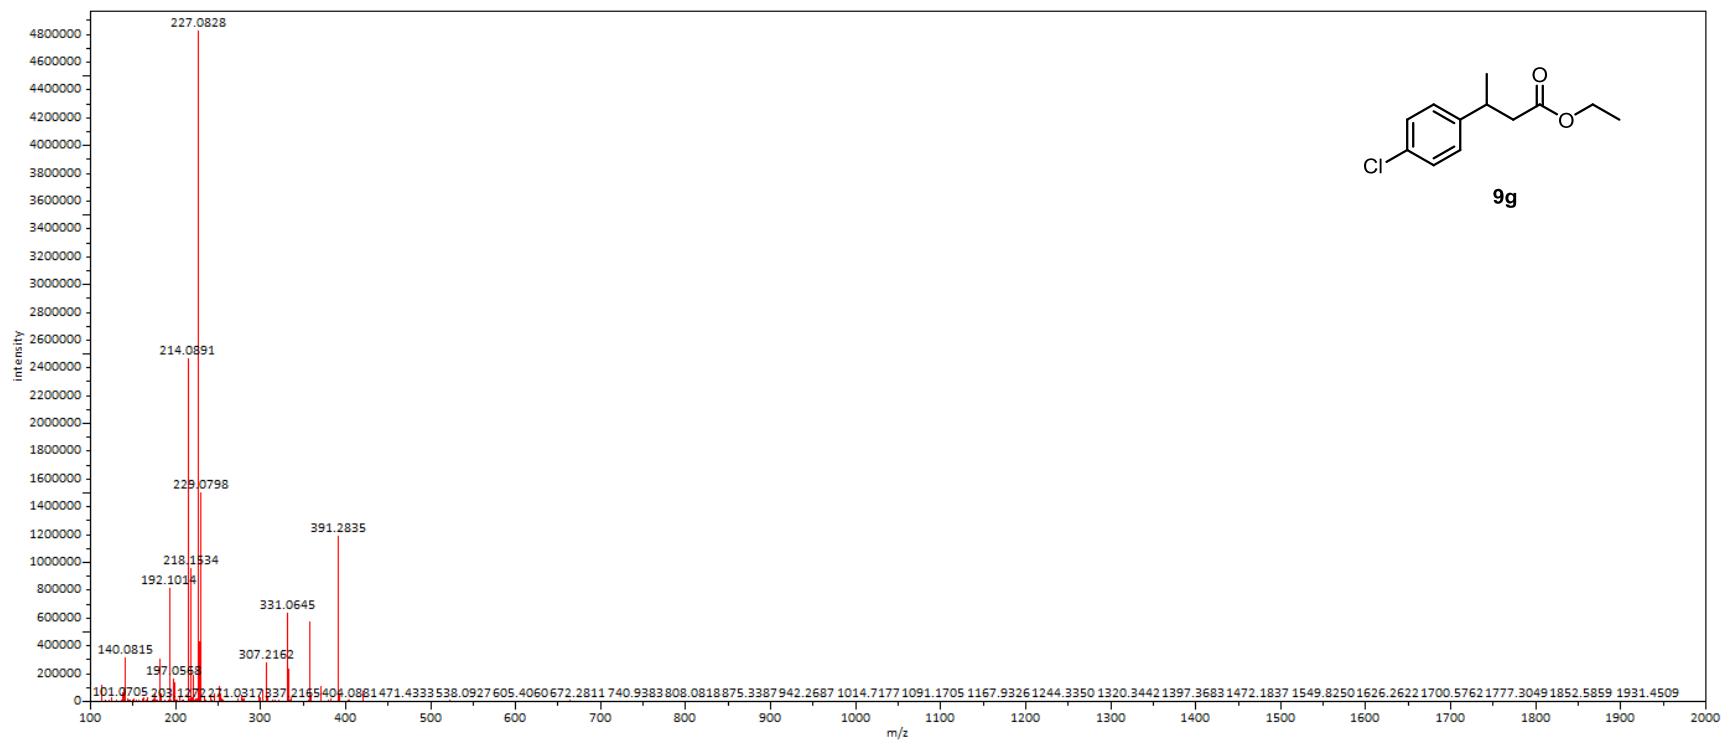



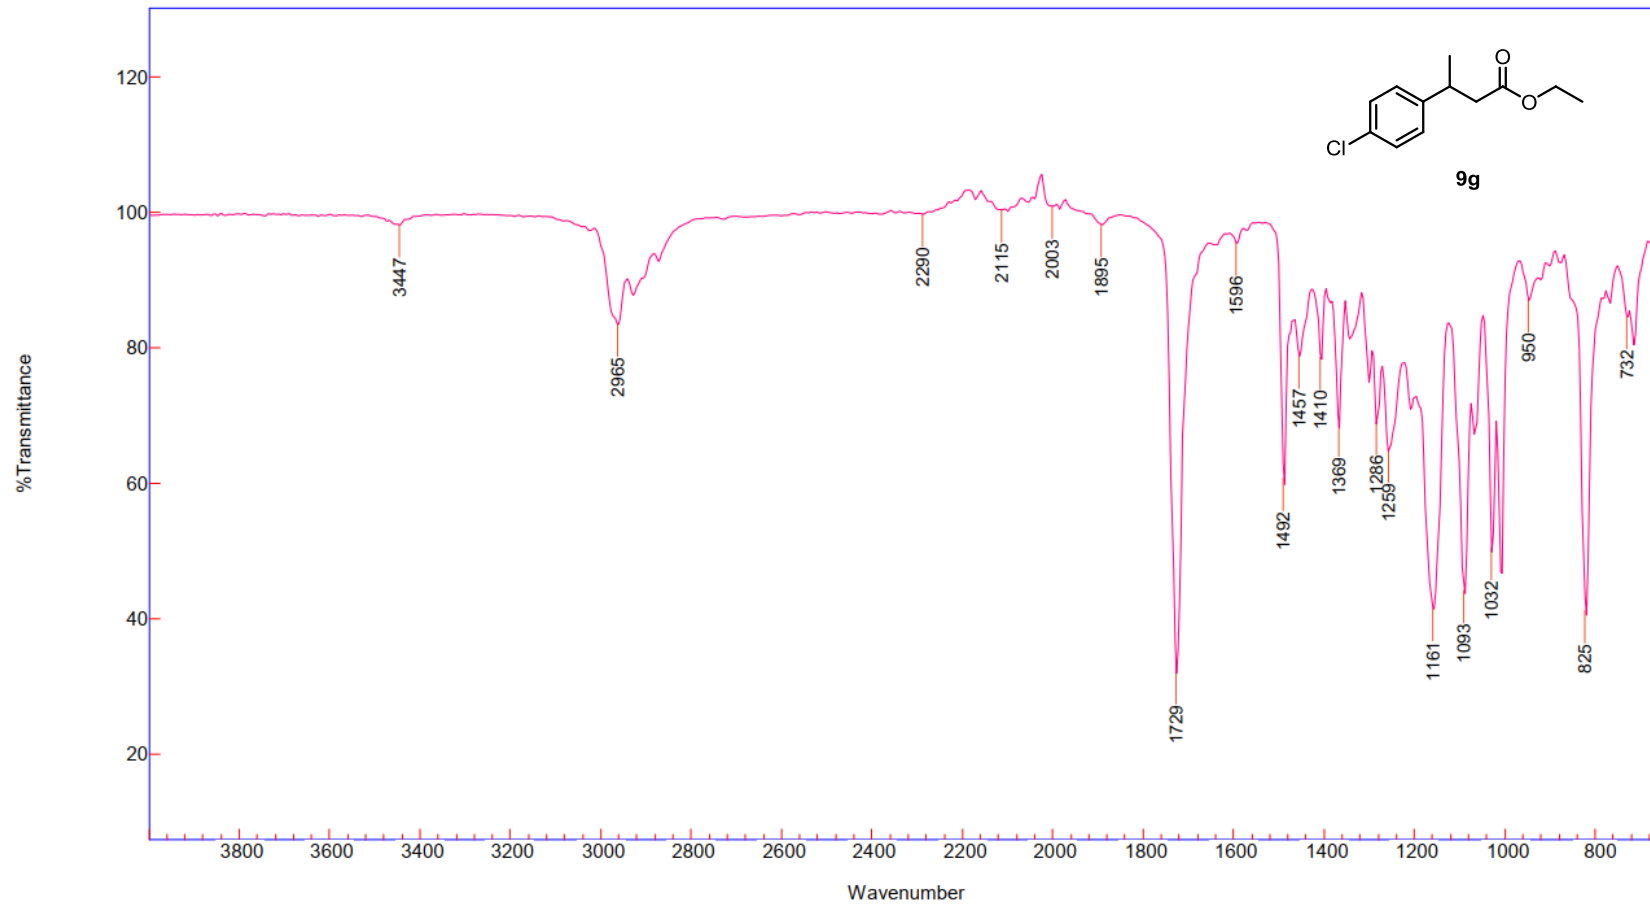

Ethyl 3-(*o*-tolyl)butanoate (9h)

$^1\text{H}$  NMR

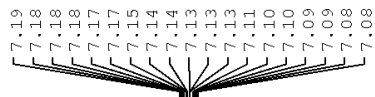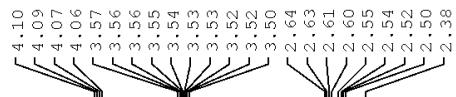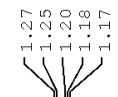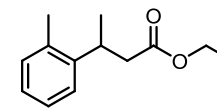

9h

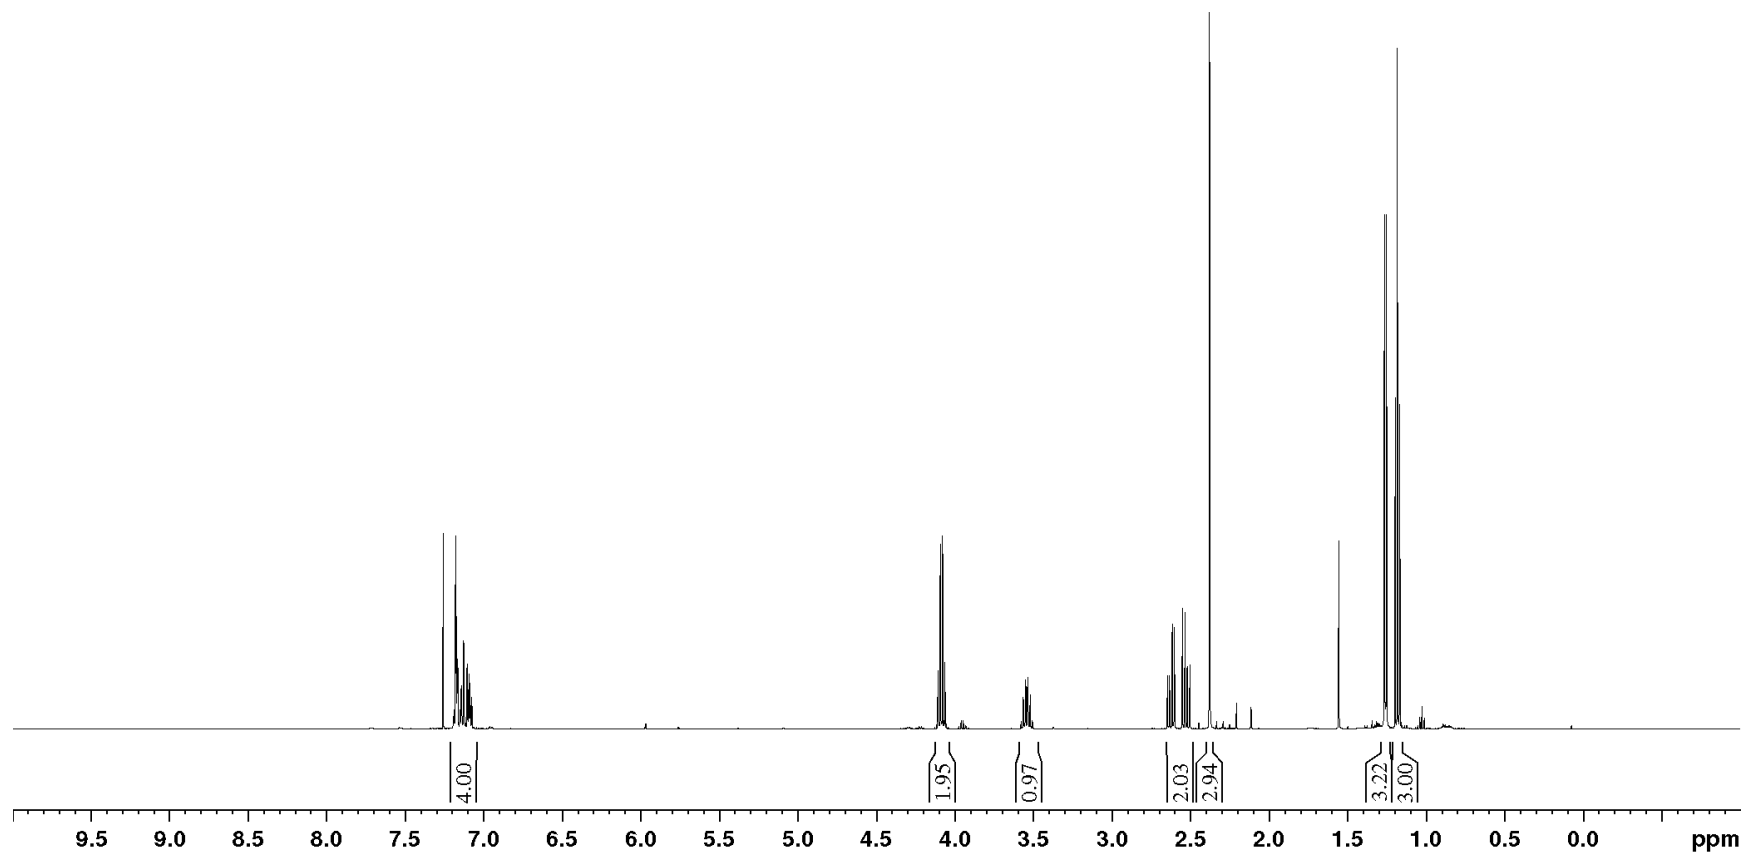

<sup>13</sup>C NMR

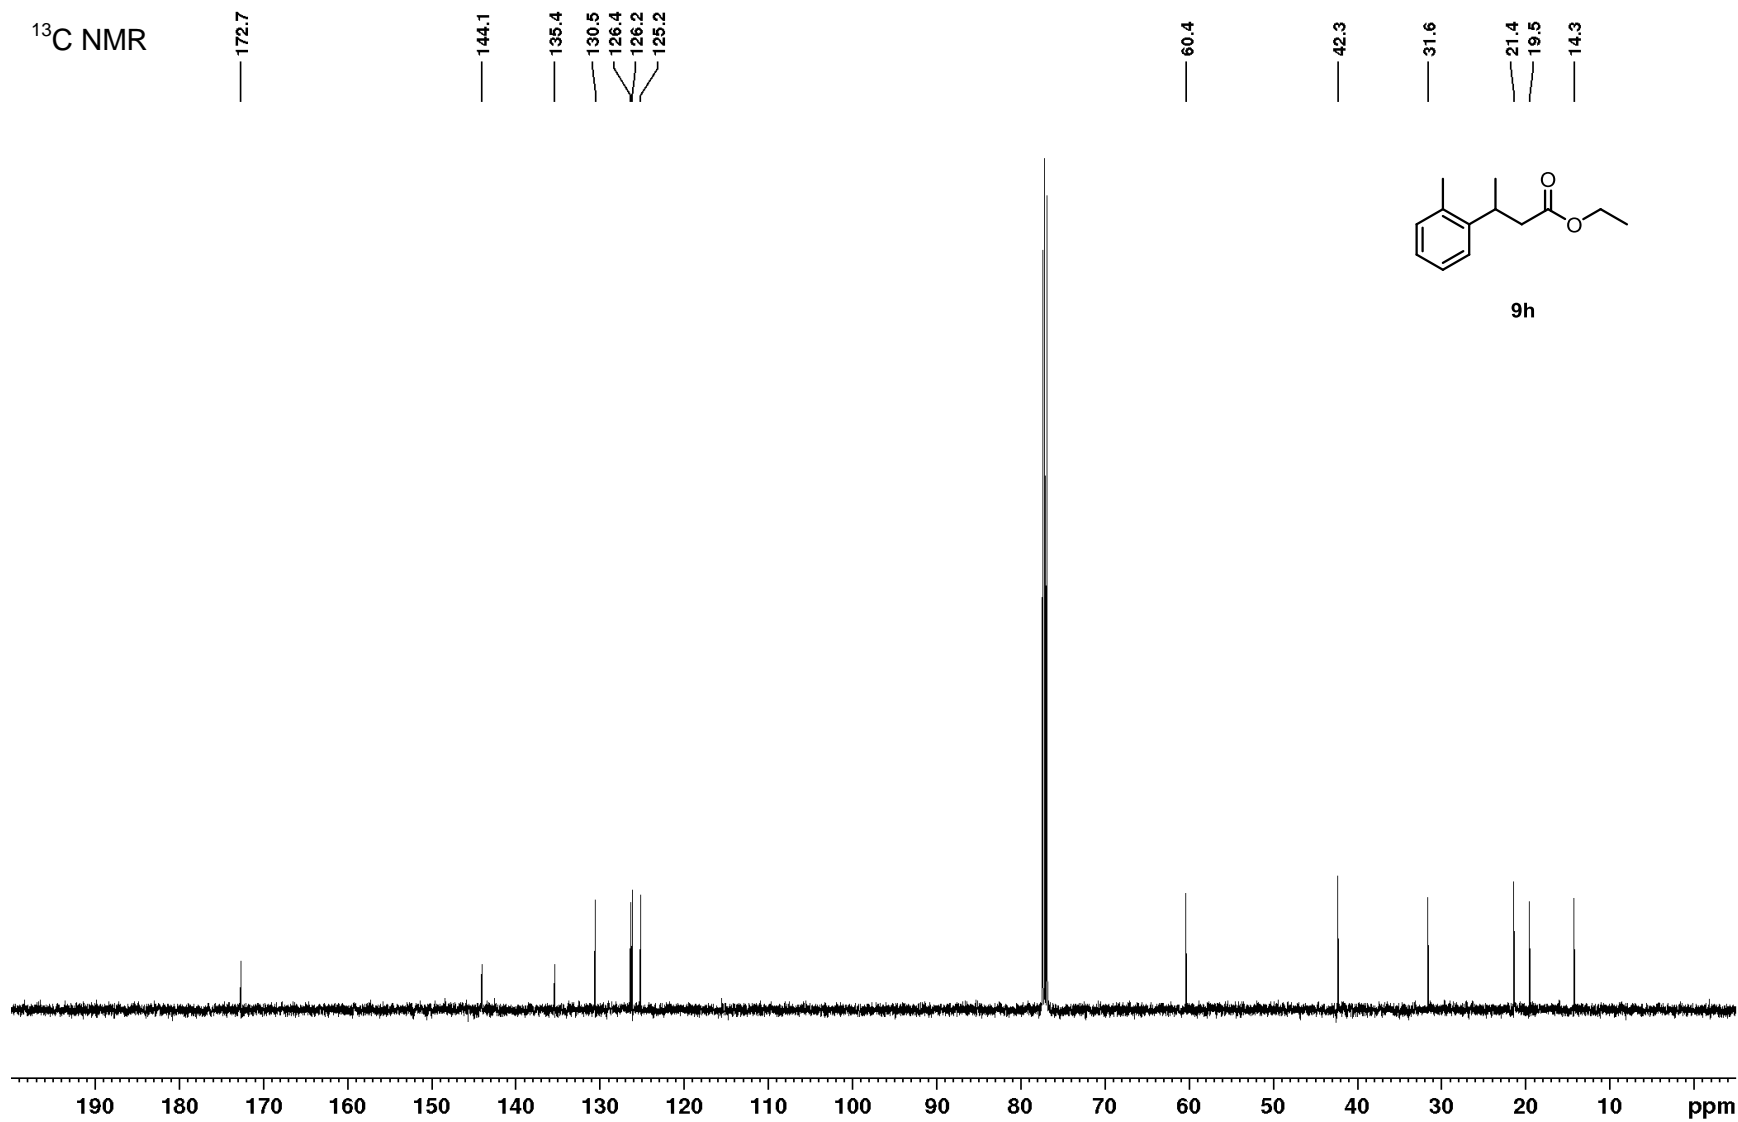

$^1\text{H}$ - $^1\text{H}$  COSY

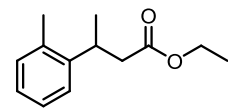

ppm

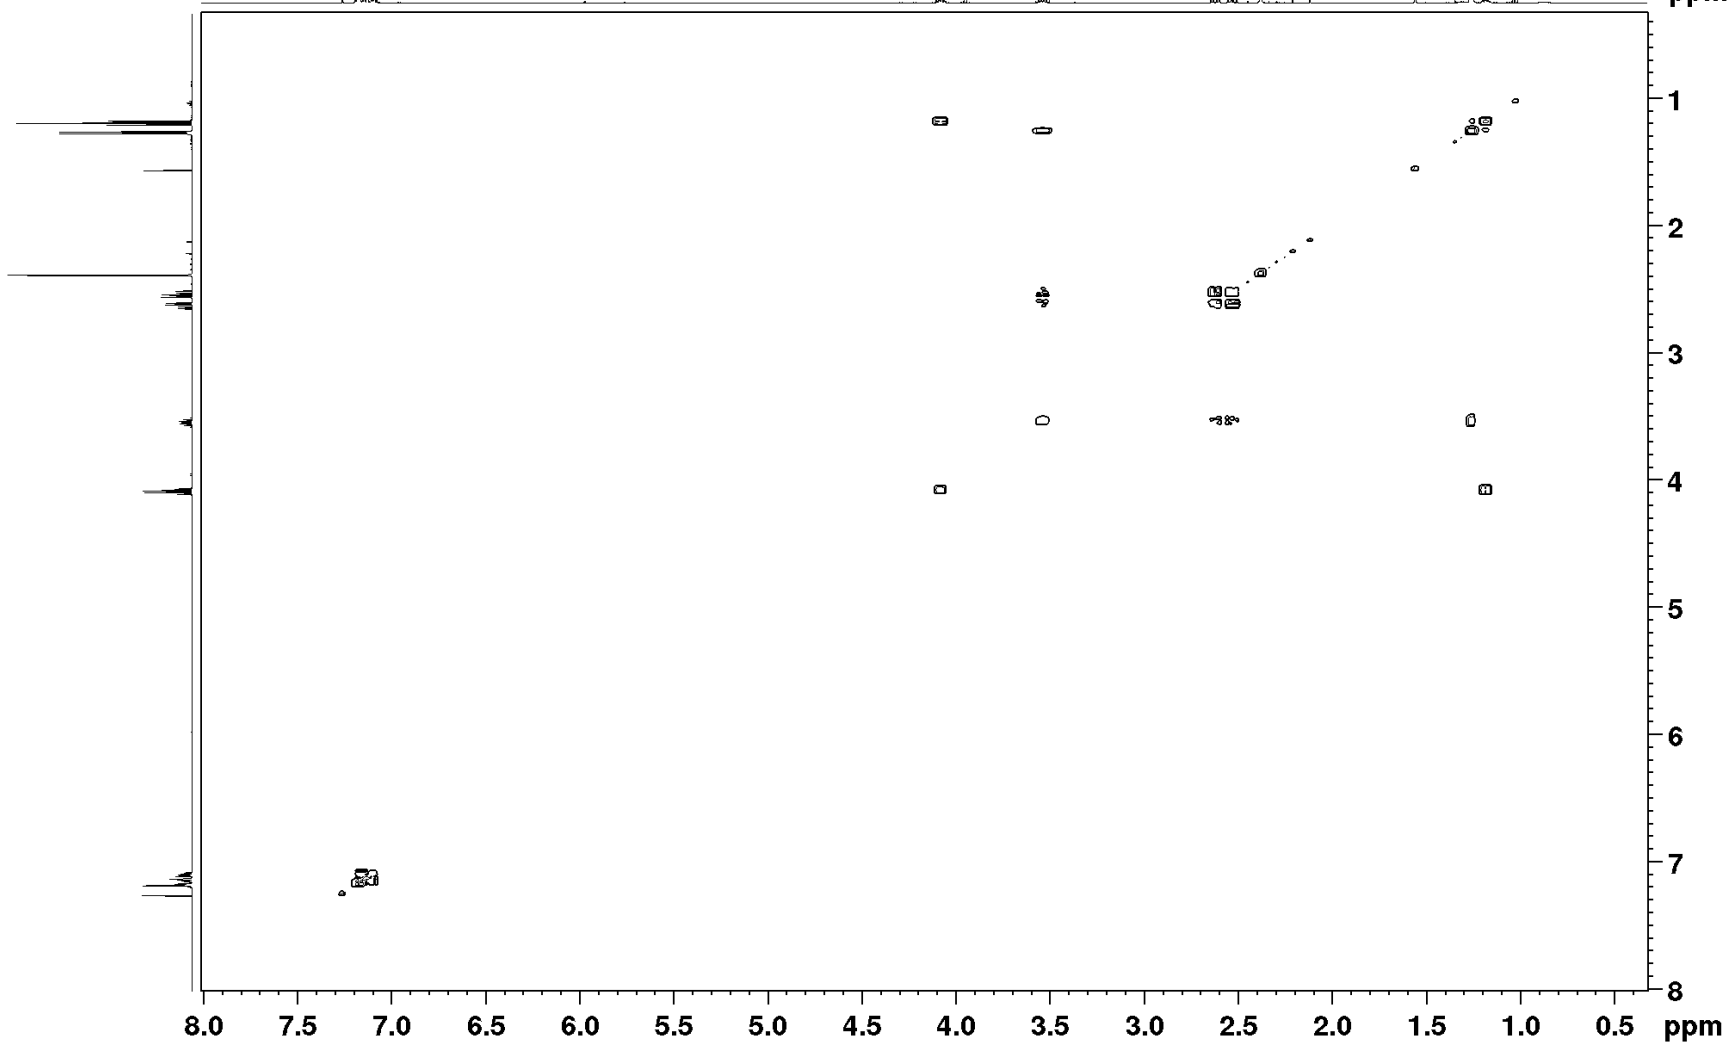

$^1\text{H}$ - $^{13}\text{C}$  HSQC

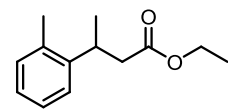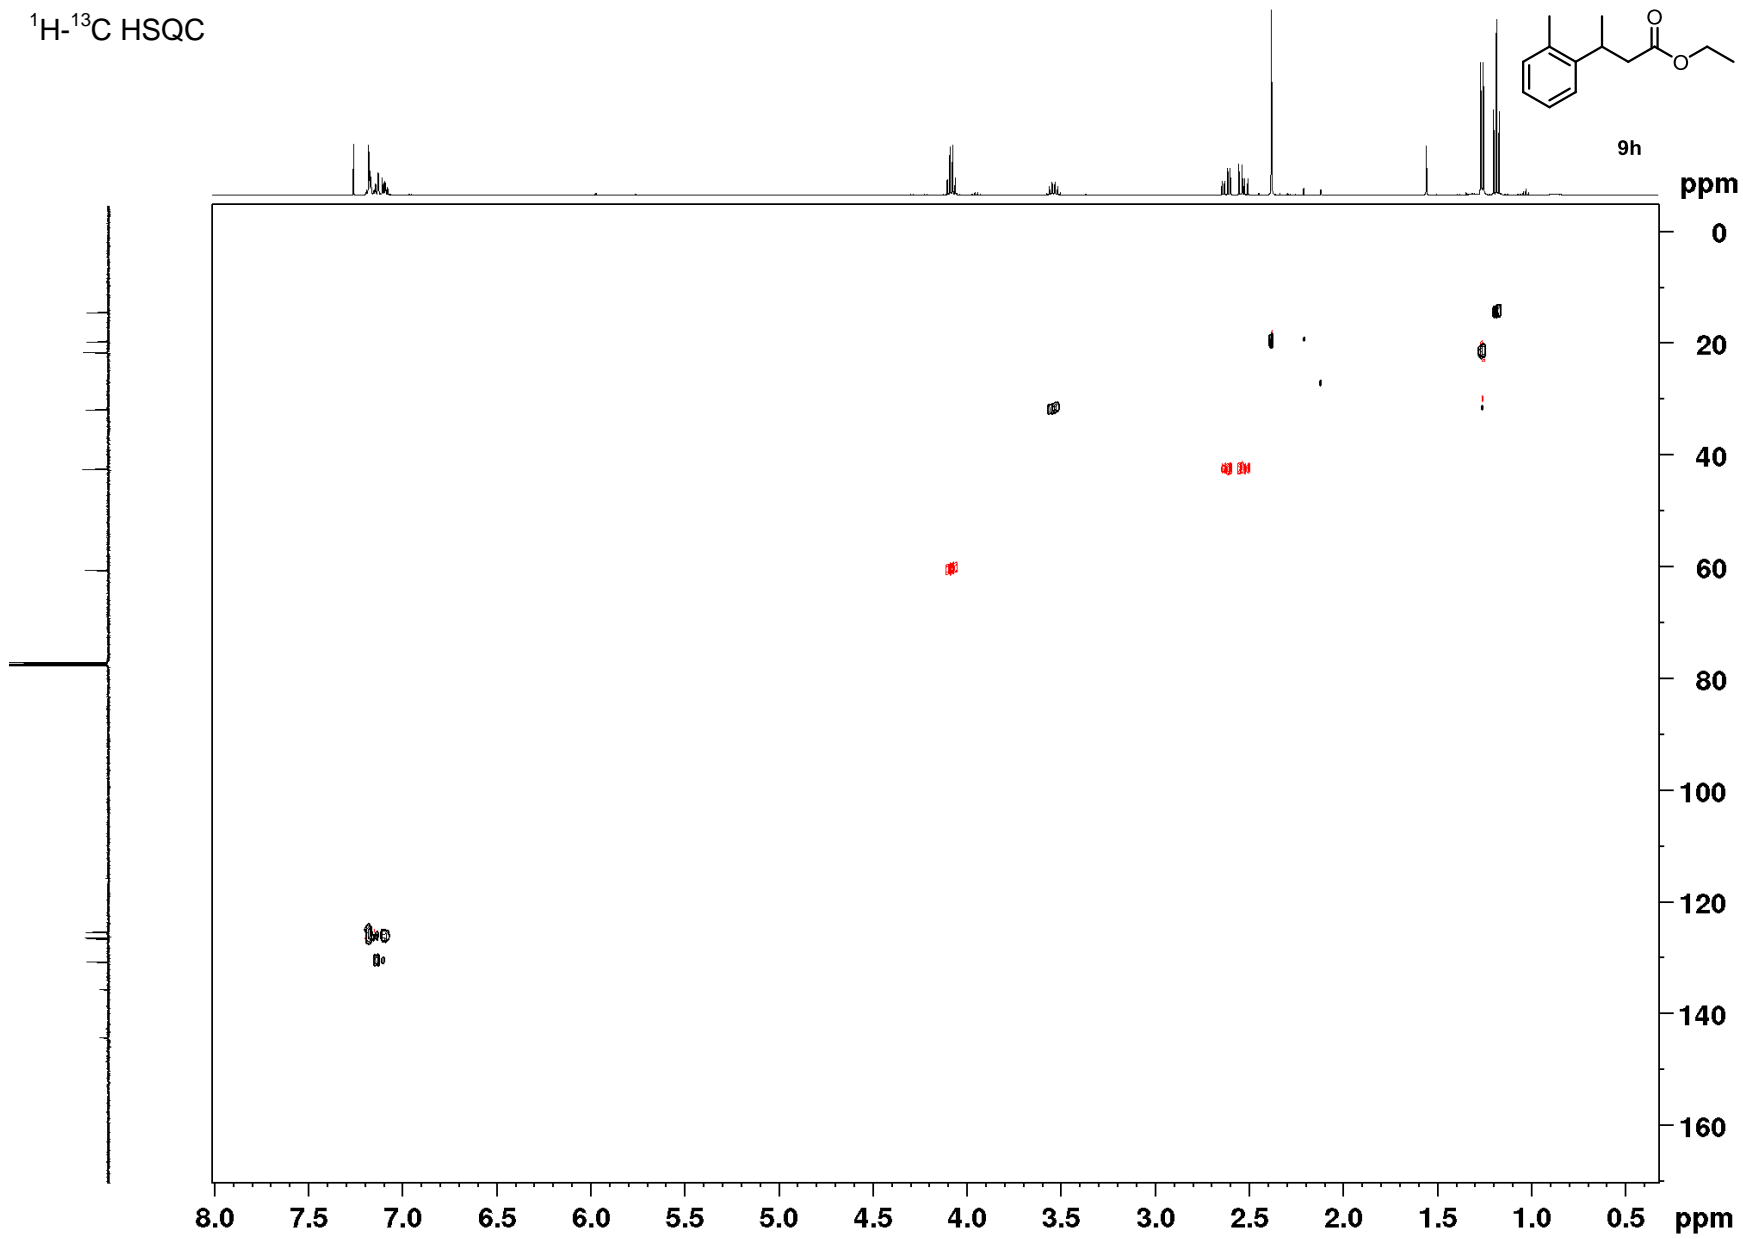

$^1\text{H}$ - $^{13}\text{C}$  HMBC

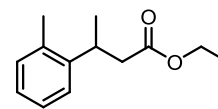

9h

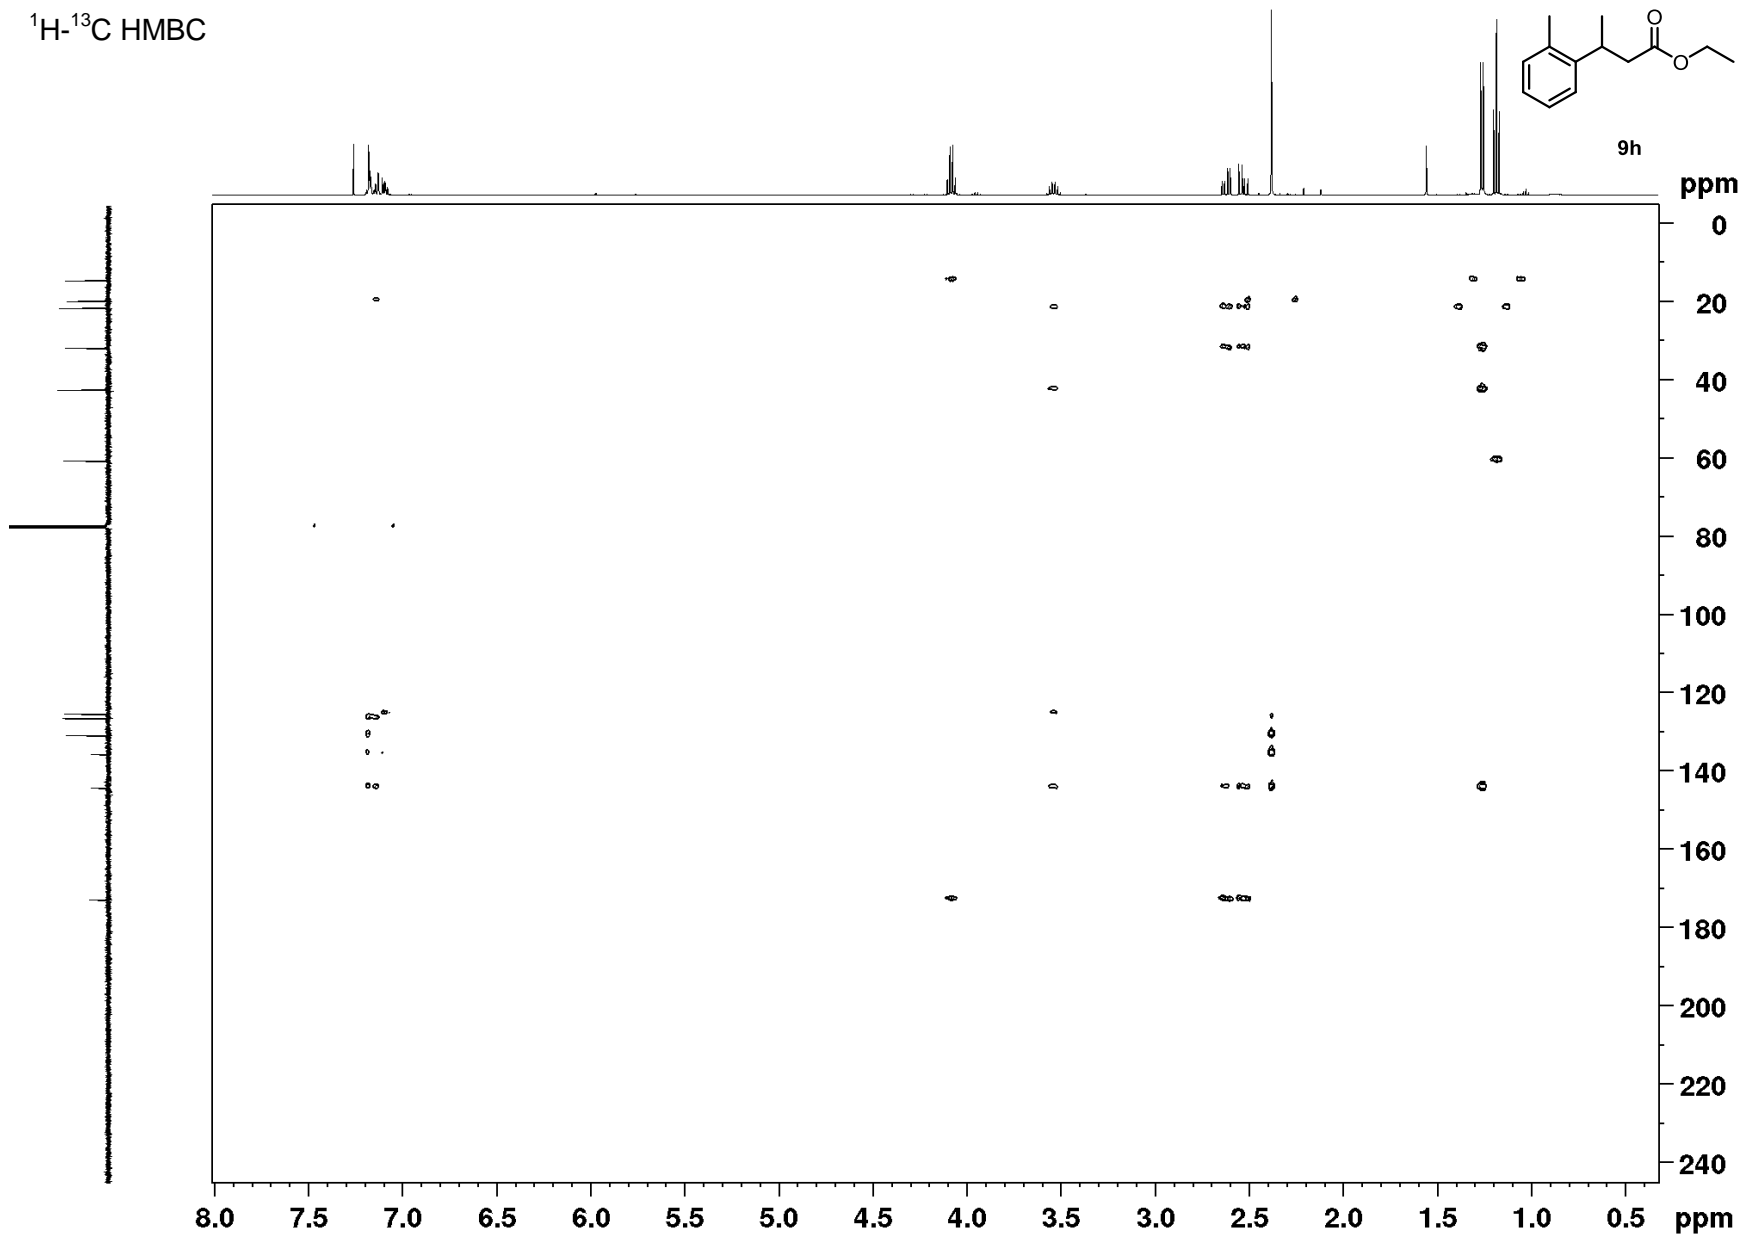

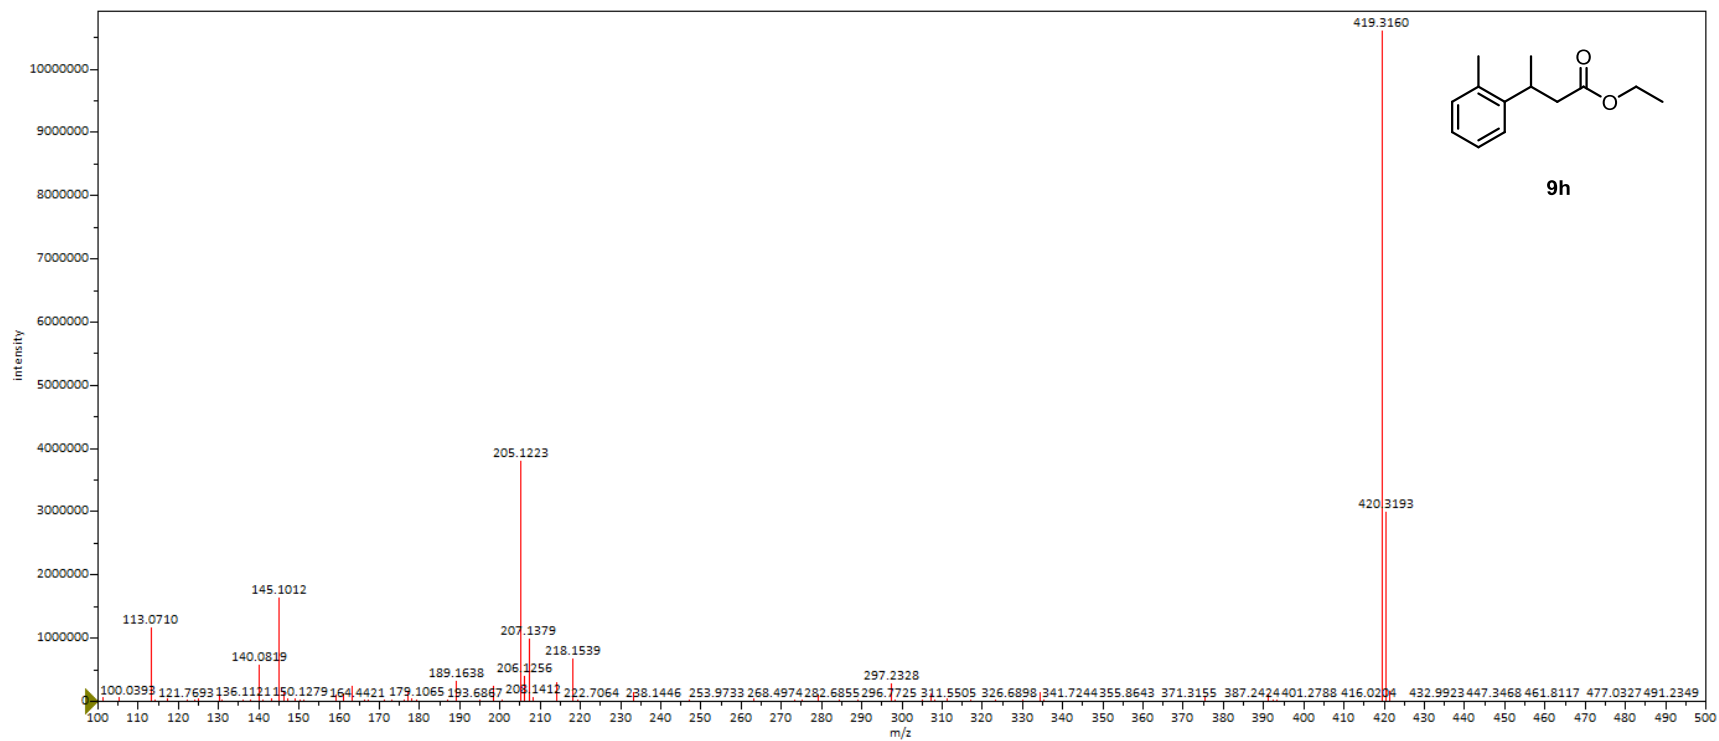

**Ethyl 3-(4-cyanophenyl)butanoate (9j)**

<sup>1</sup>H NMR

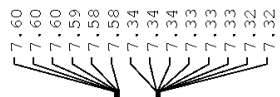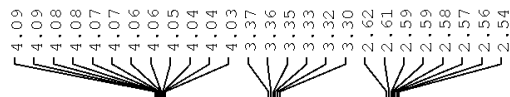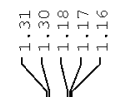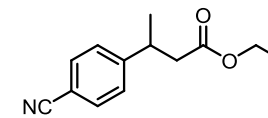

**9j**

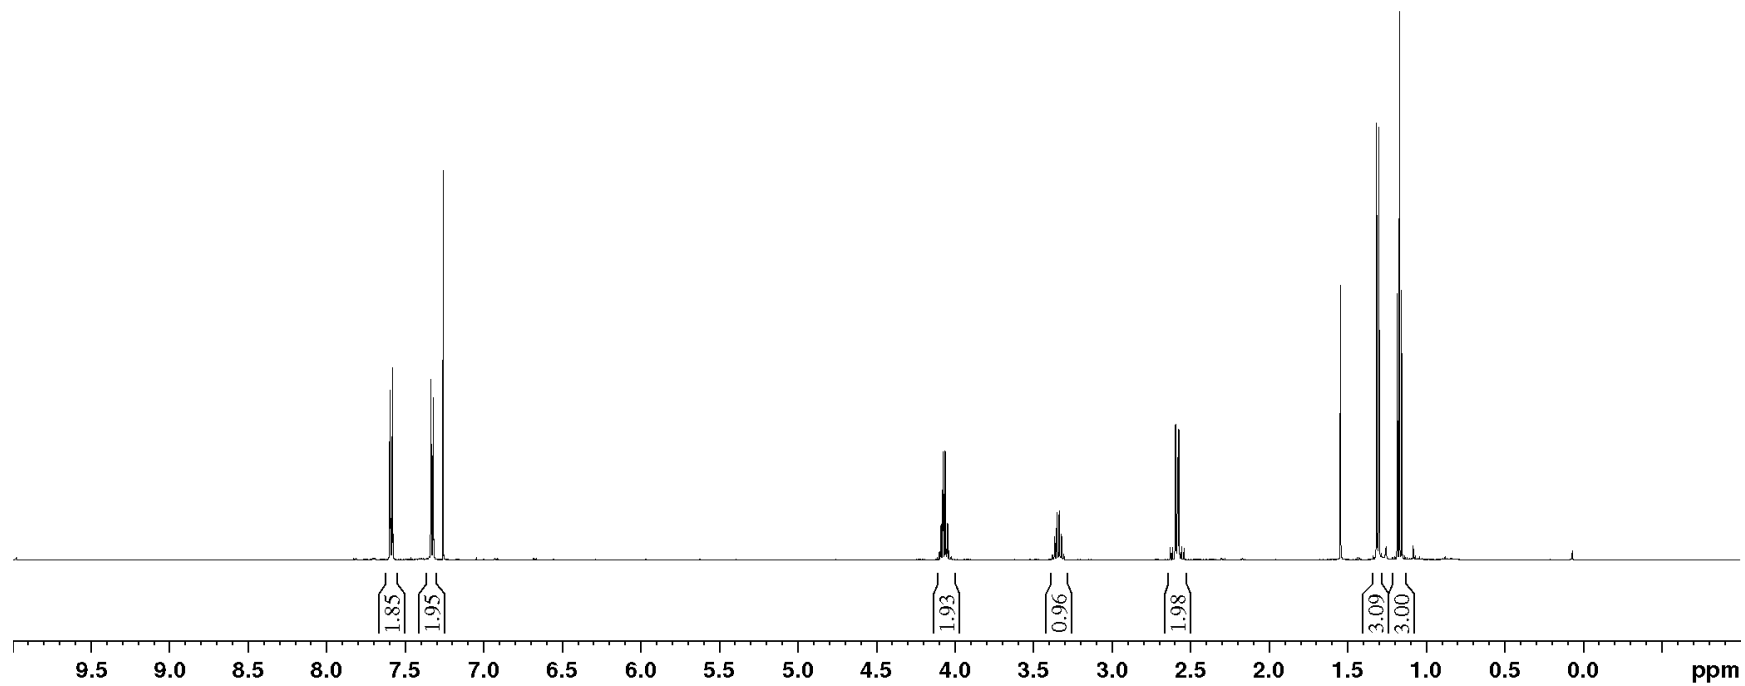



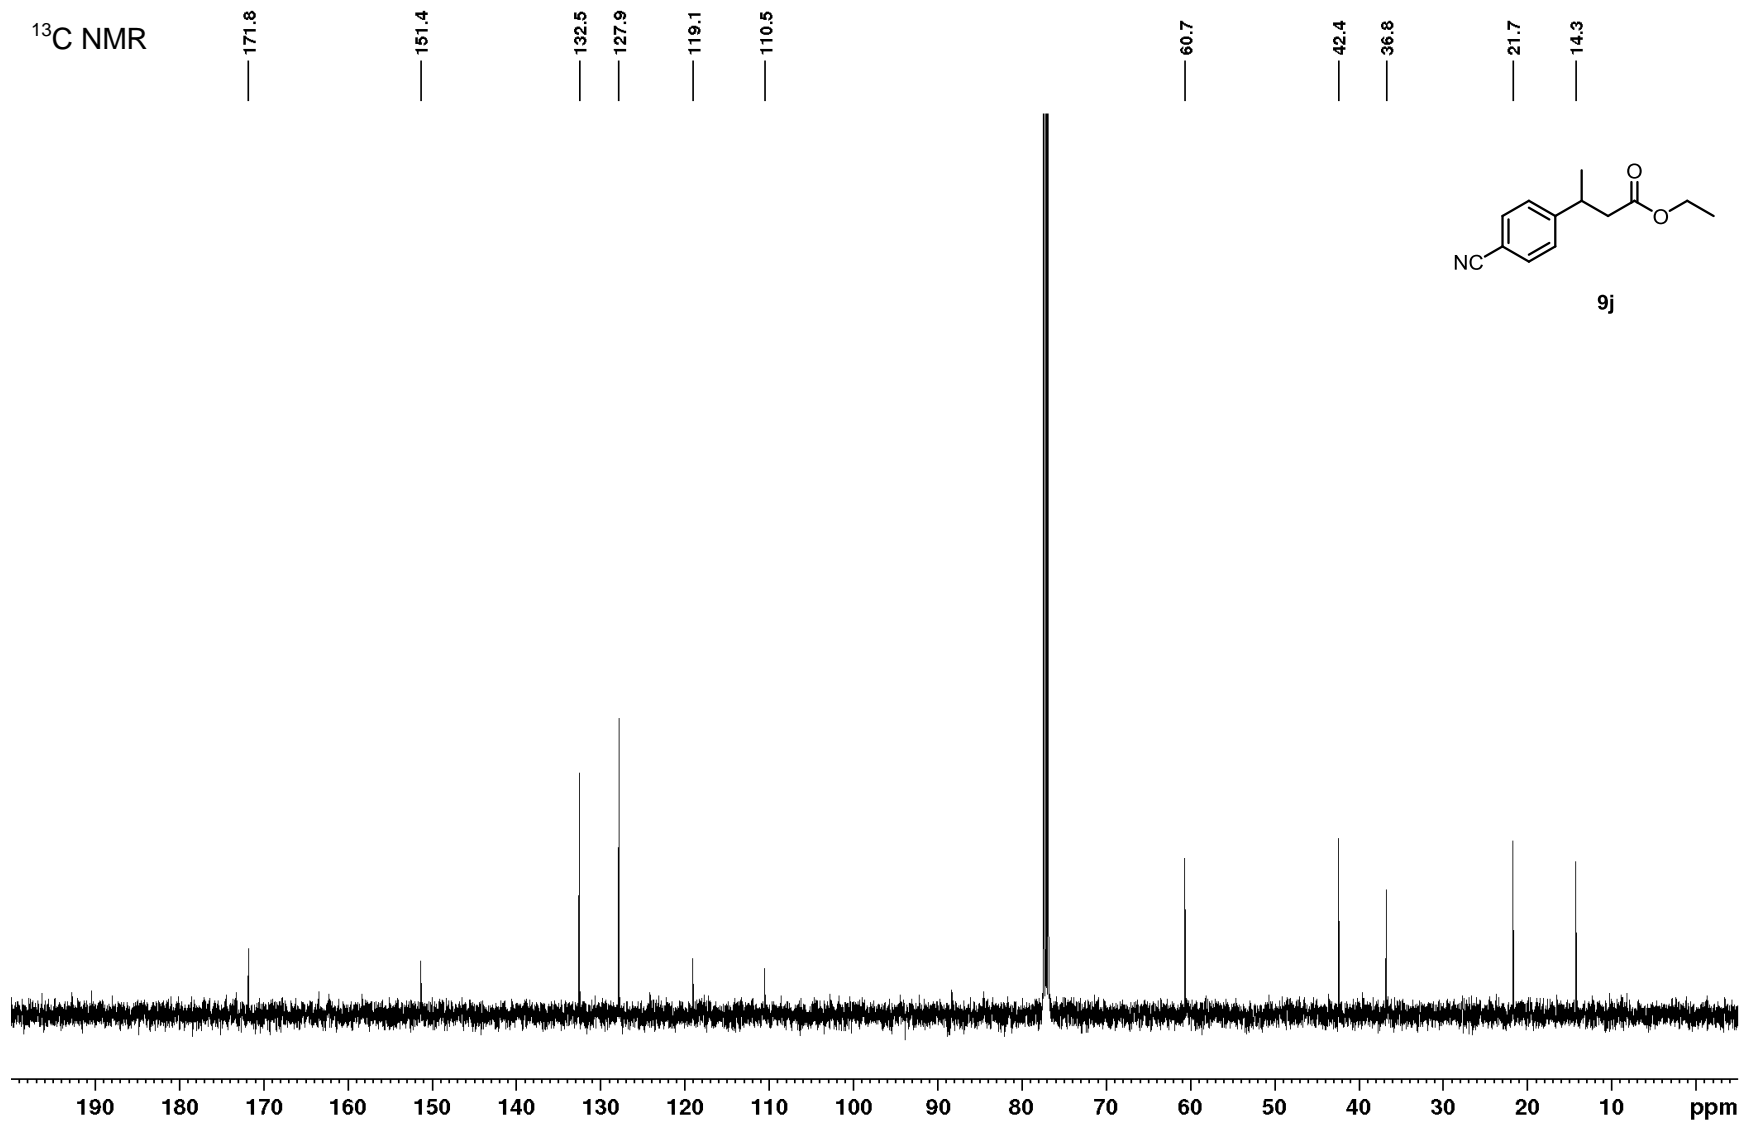

$^1\text{H}$ - $^1\text{H}$  COSY

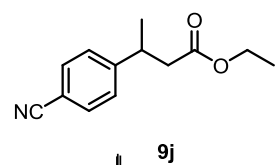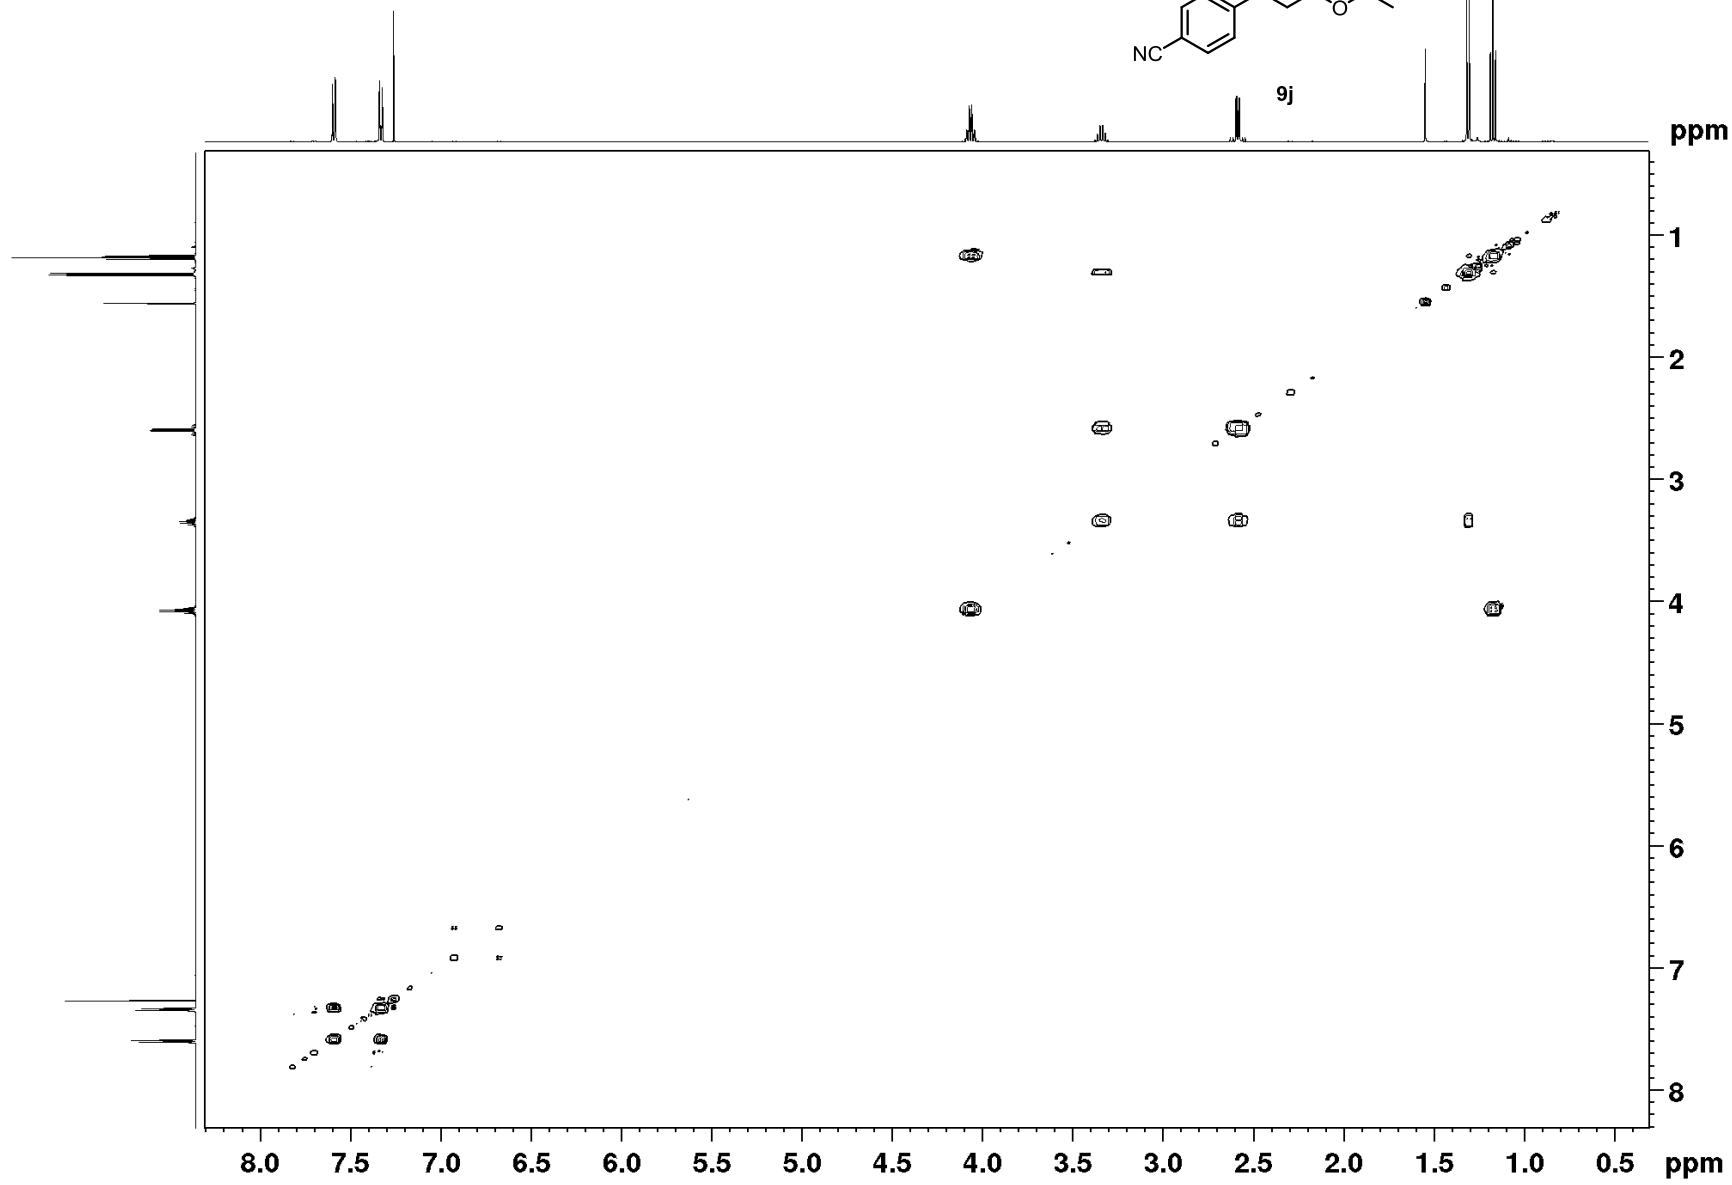

$^1\text{H}$ - $^{13}\text{C}$  HSQC

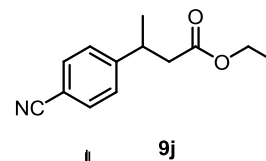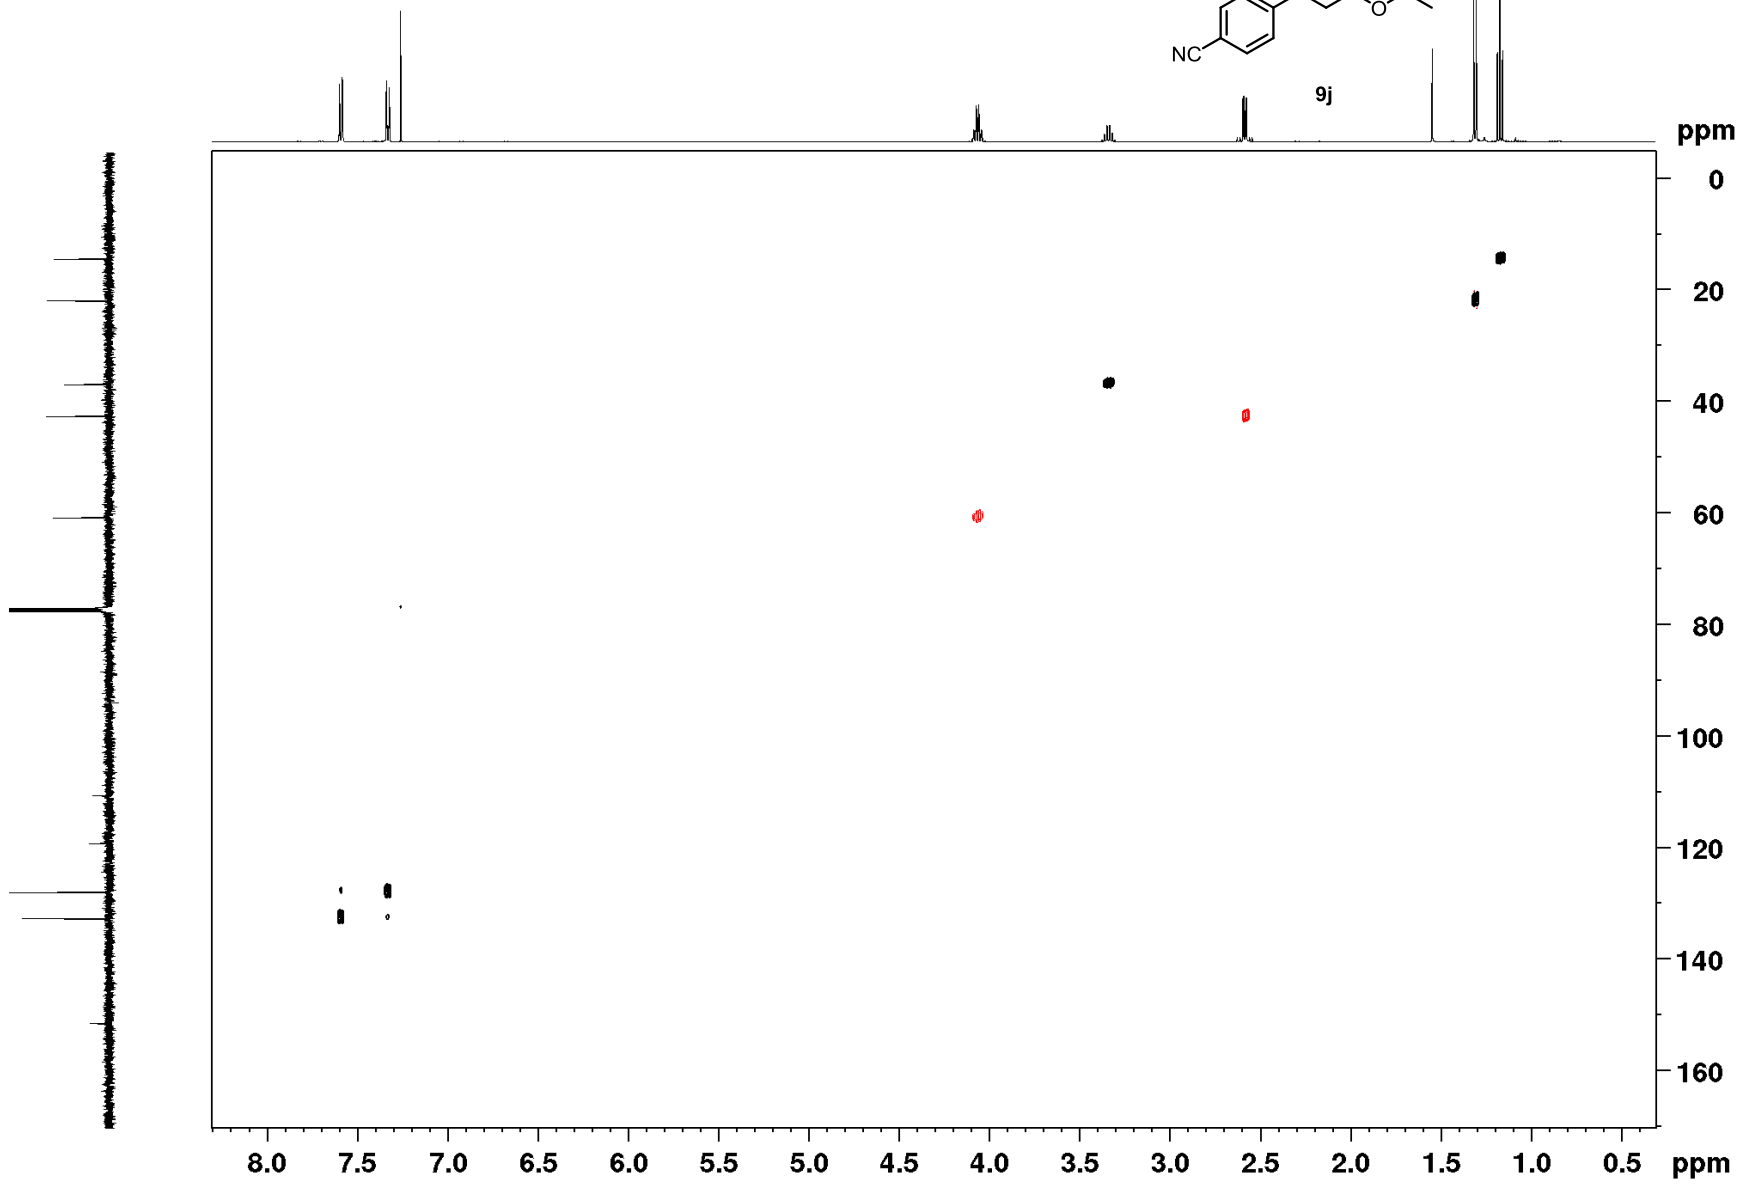

$^1\text{H}$ - $^{13}\text{C}$  HMBC

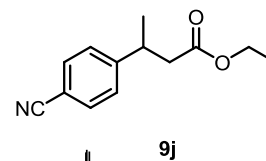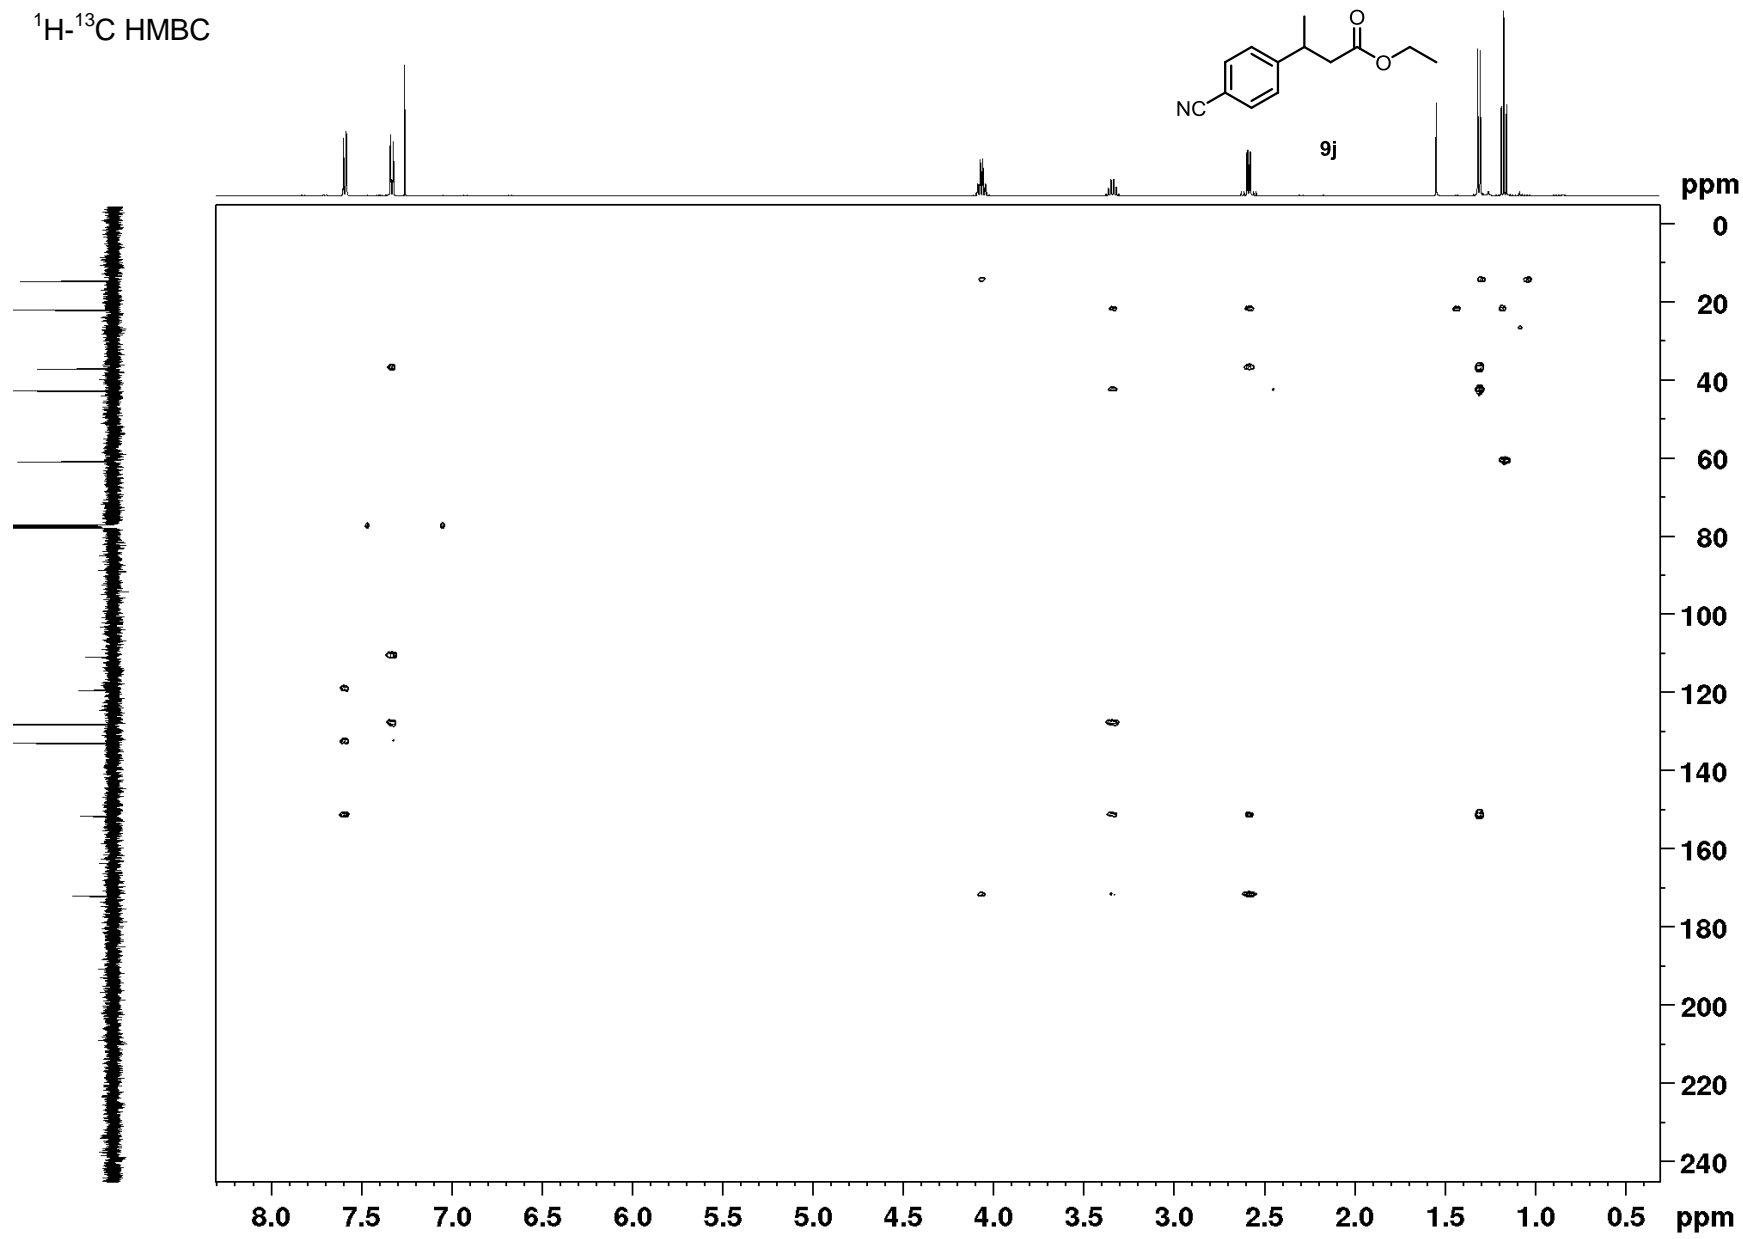

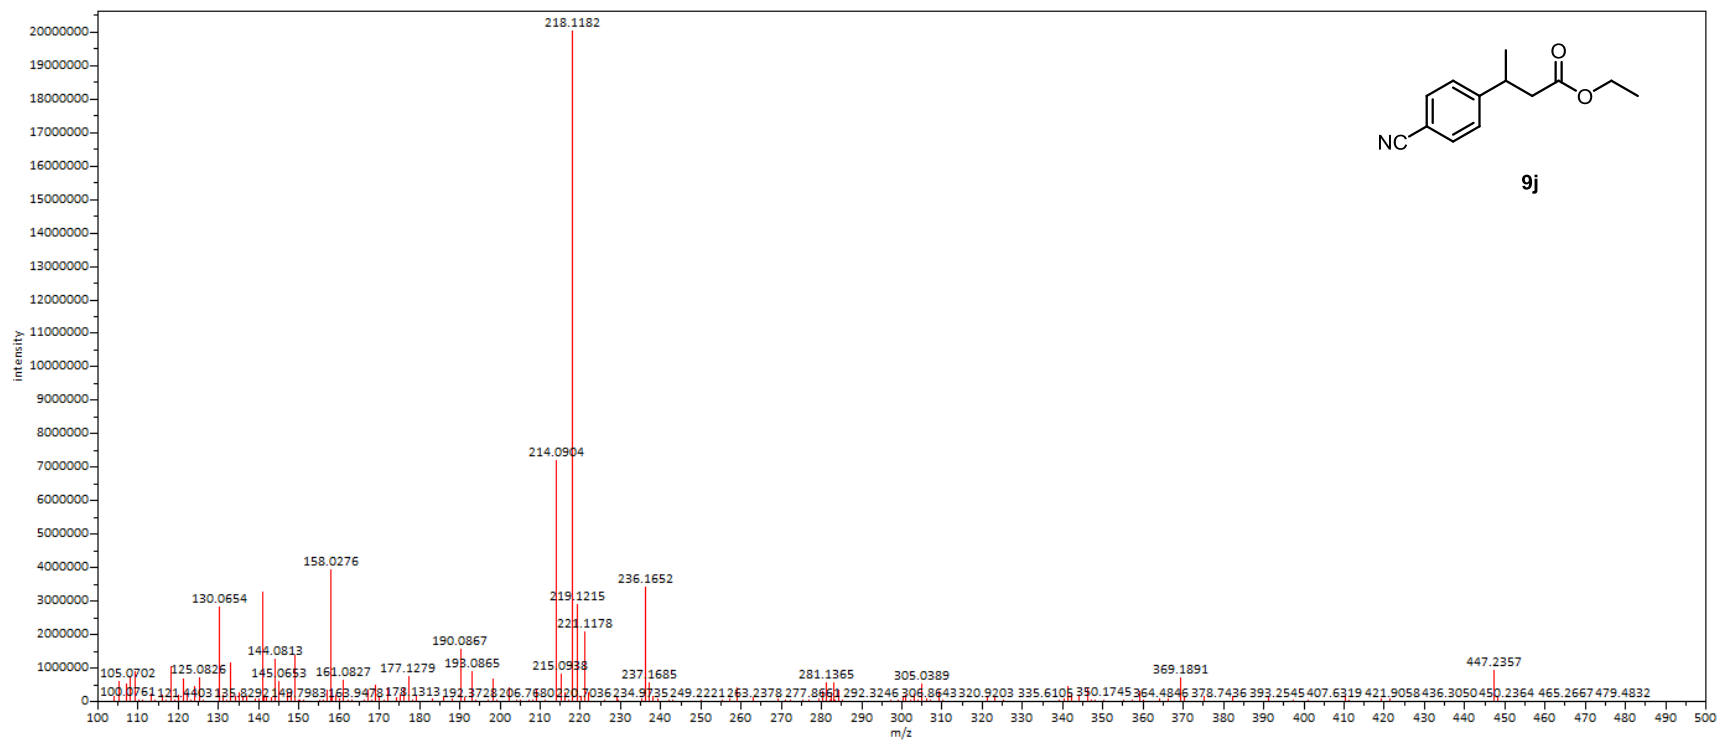

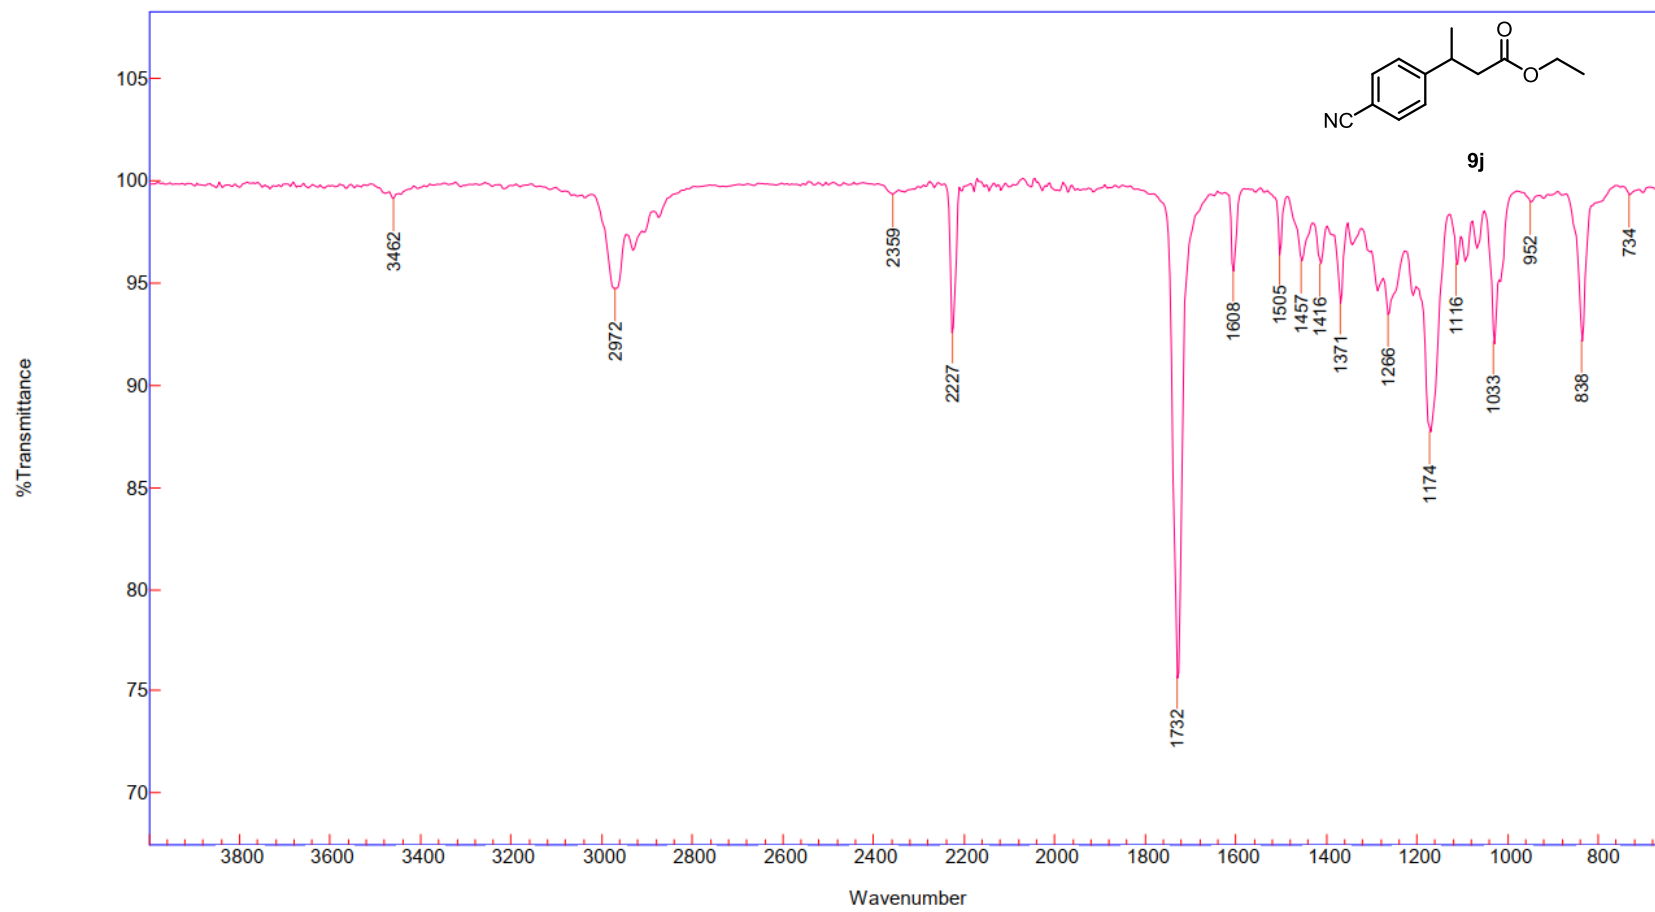

**Ethyl 3-(4-hydroxyphenyl)butanoate (9I)**

<sup>1</sup>H NMR

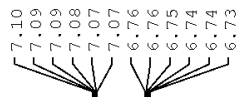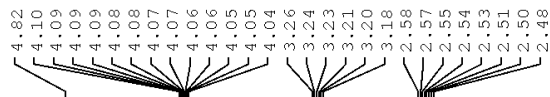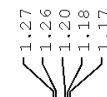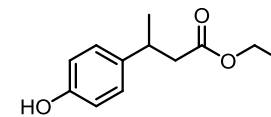

**9I**

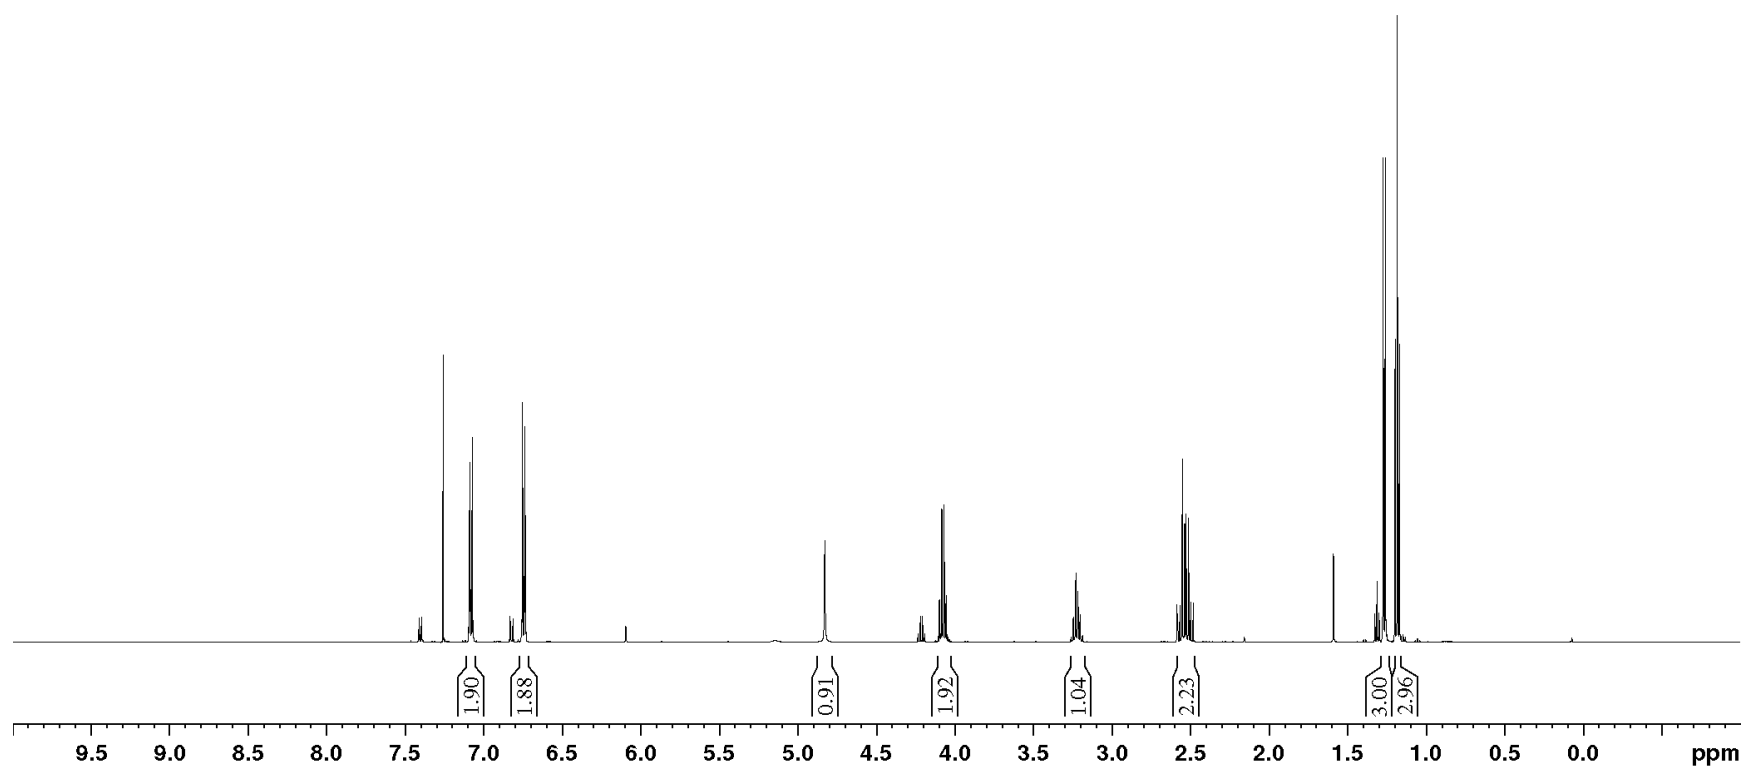

<sup>13</sup>C NMR

172.8

154.2

138.1

128.0

115.4

60.4

43.4

35.9

22.2

14.3

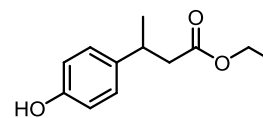

9l

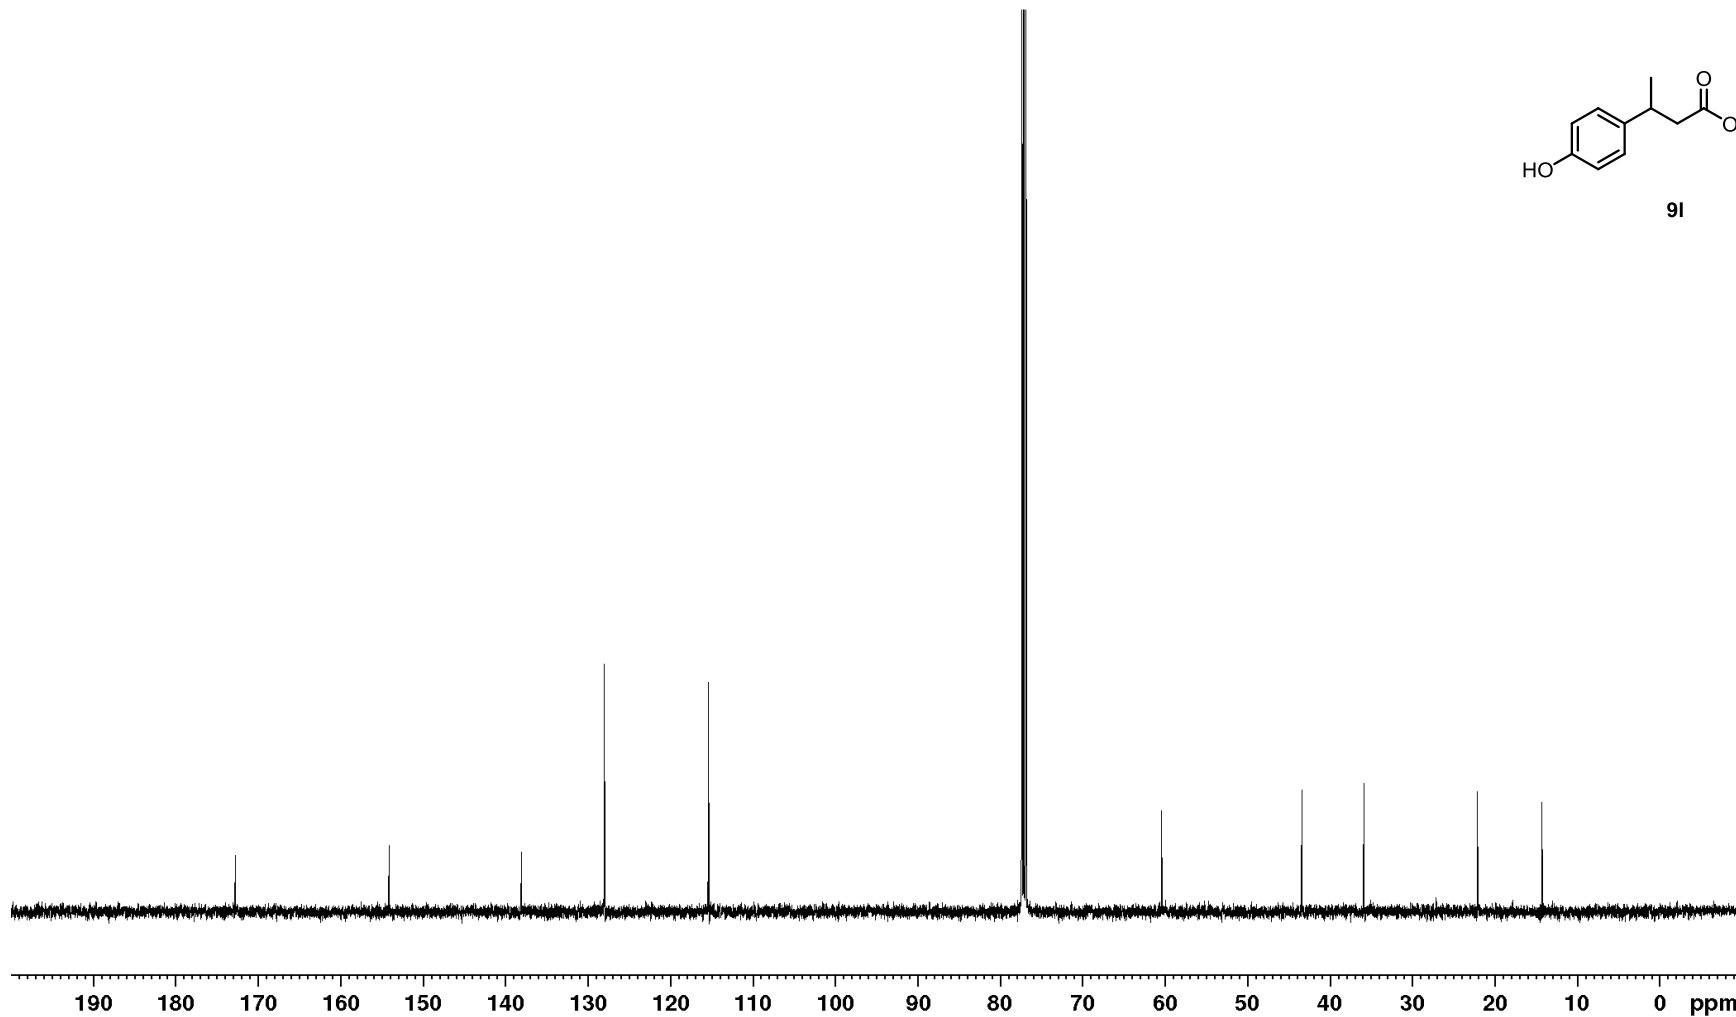



$^1\text{H}$ - $^1\text{H}$  COSY

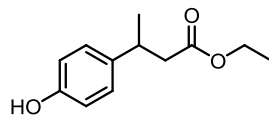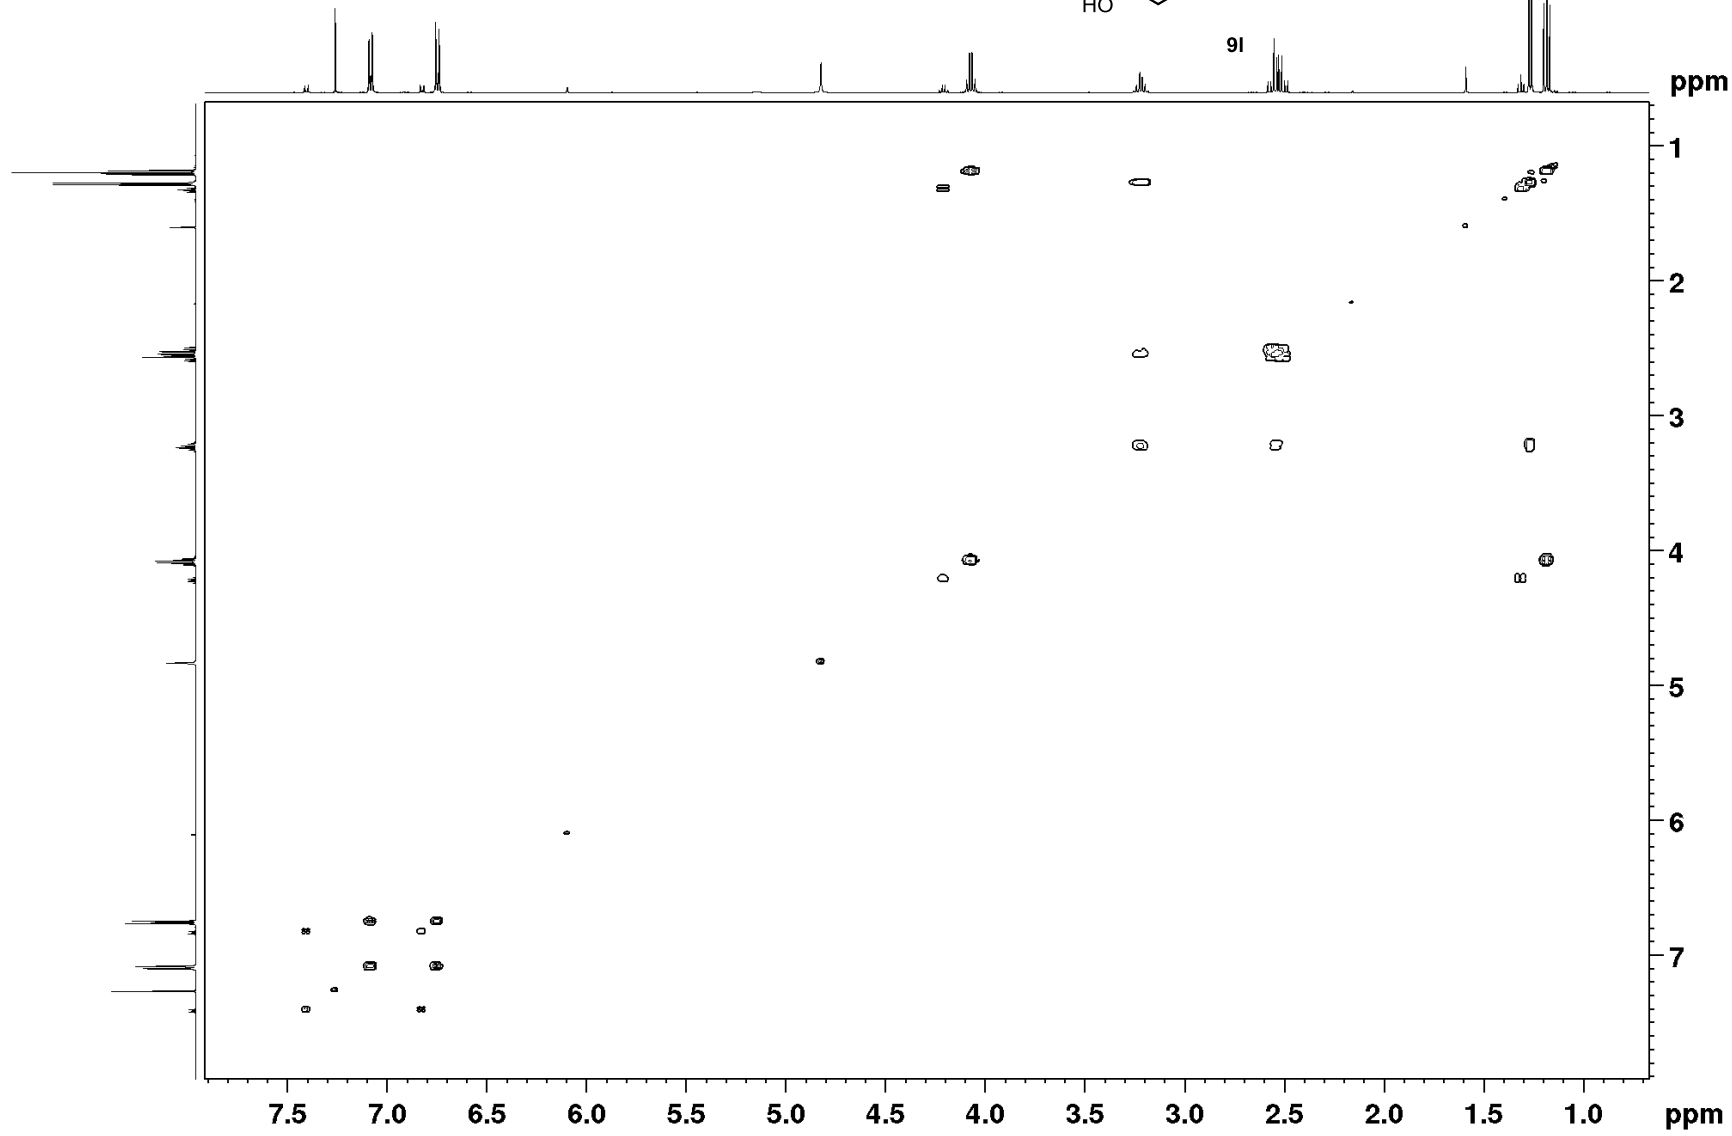

$^1\text{H}$ - $^{13}\text{C}$  HSQC

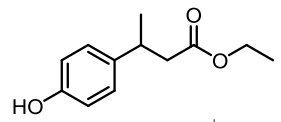

91

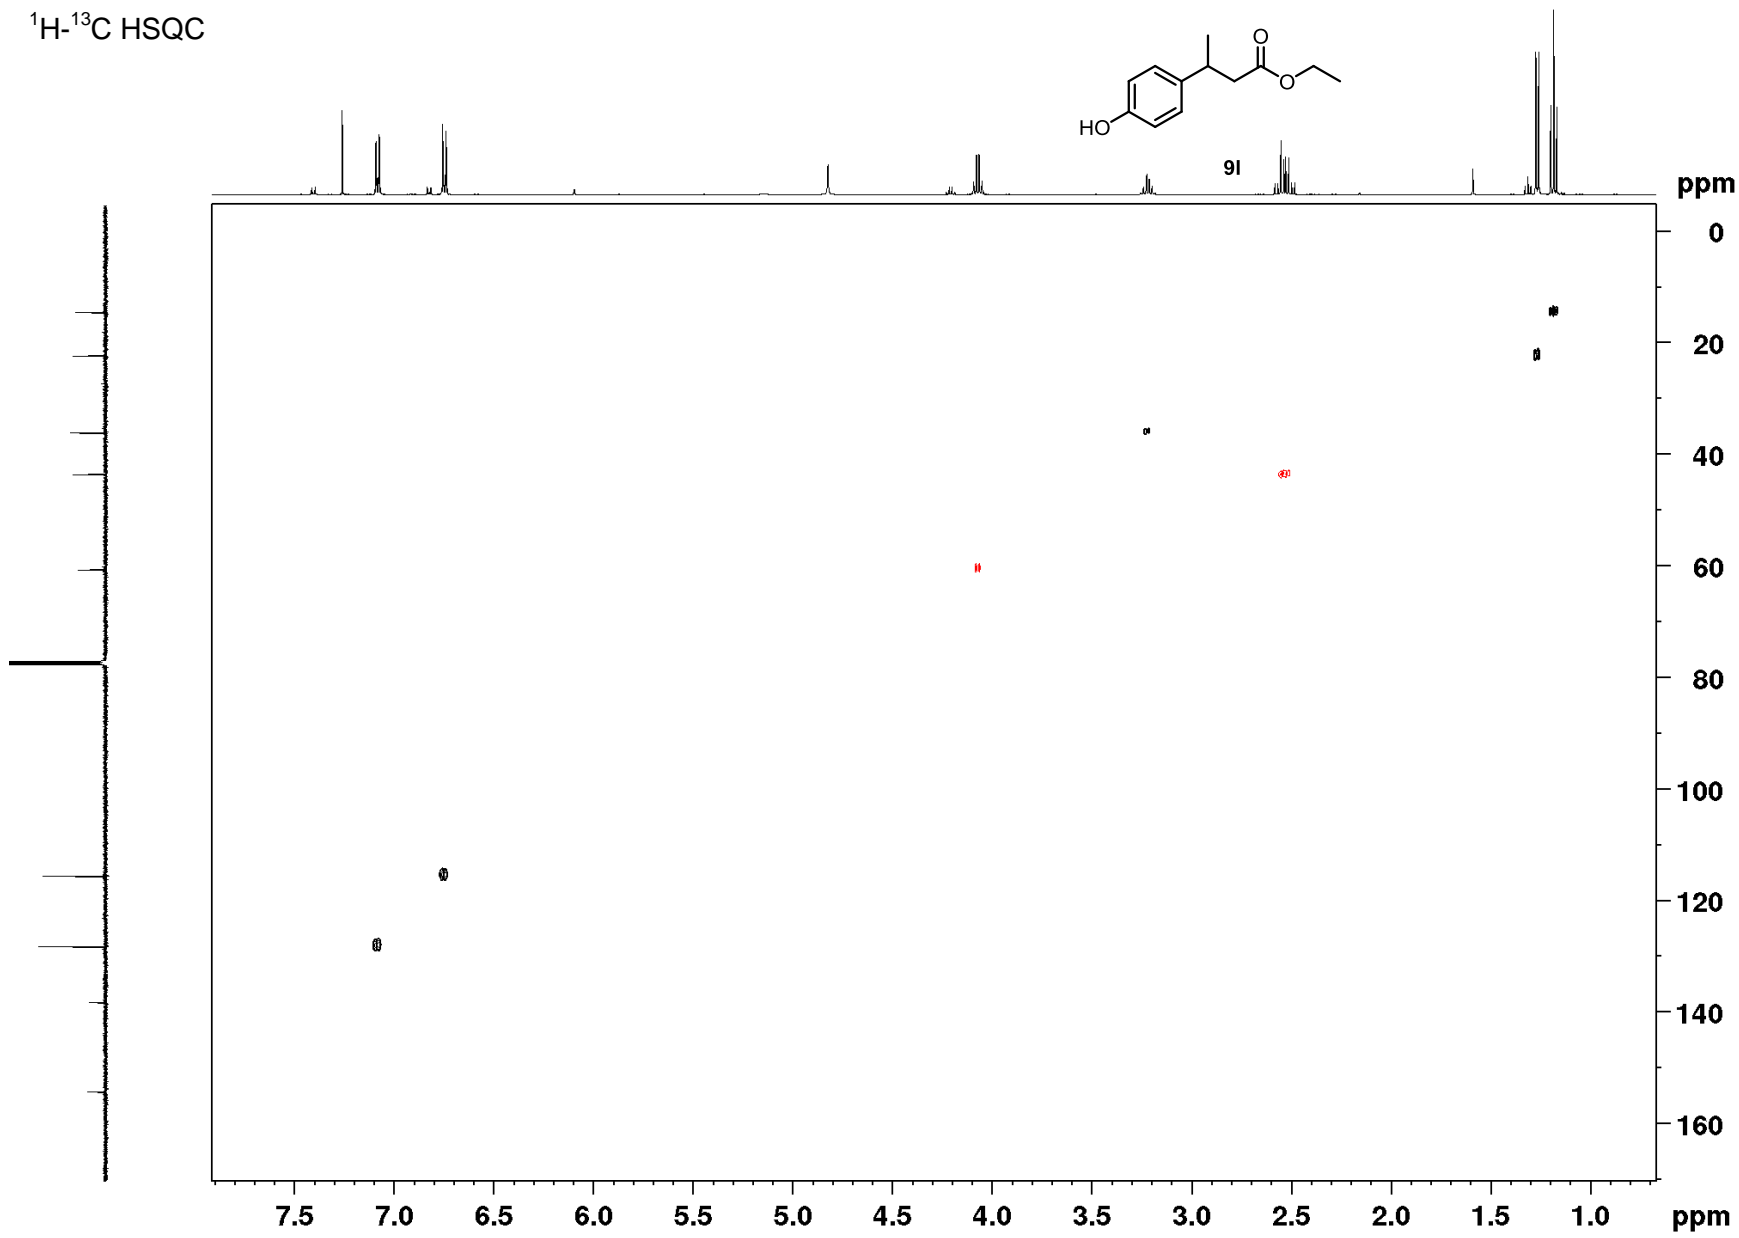

$^1\text{H}$ - $^{13}\text{C}$  HMBC

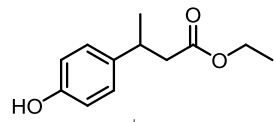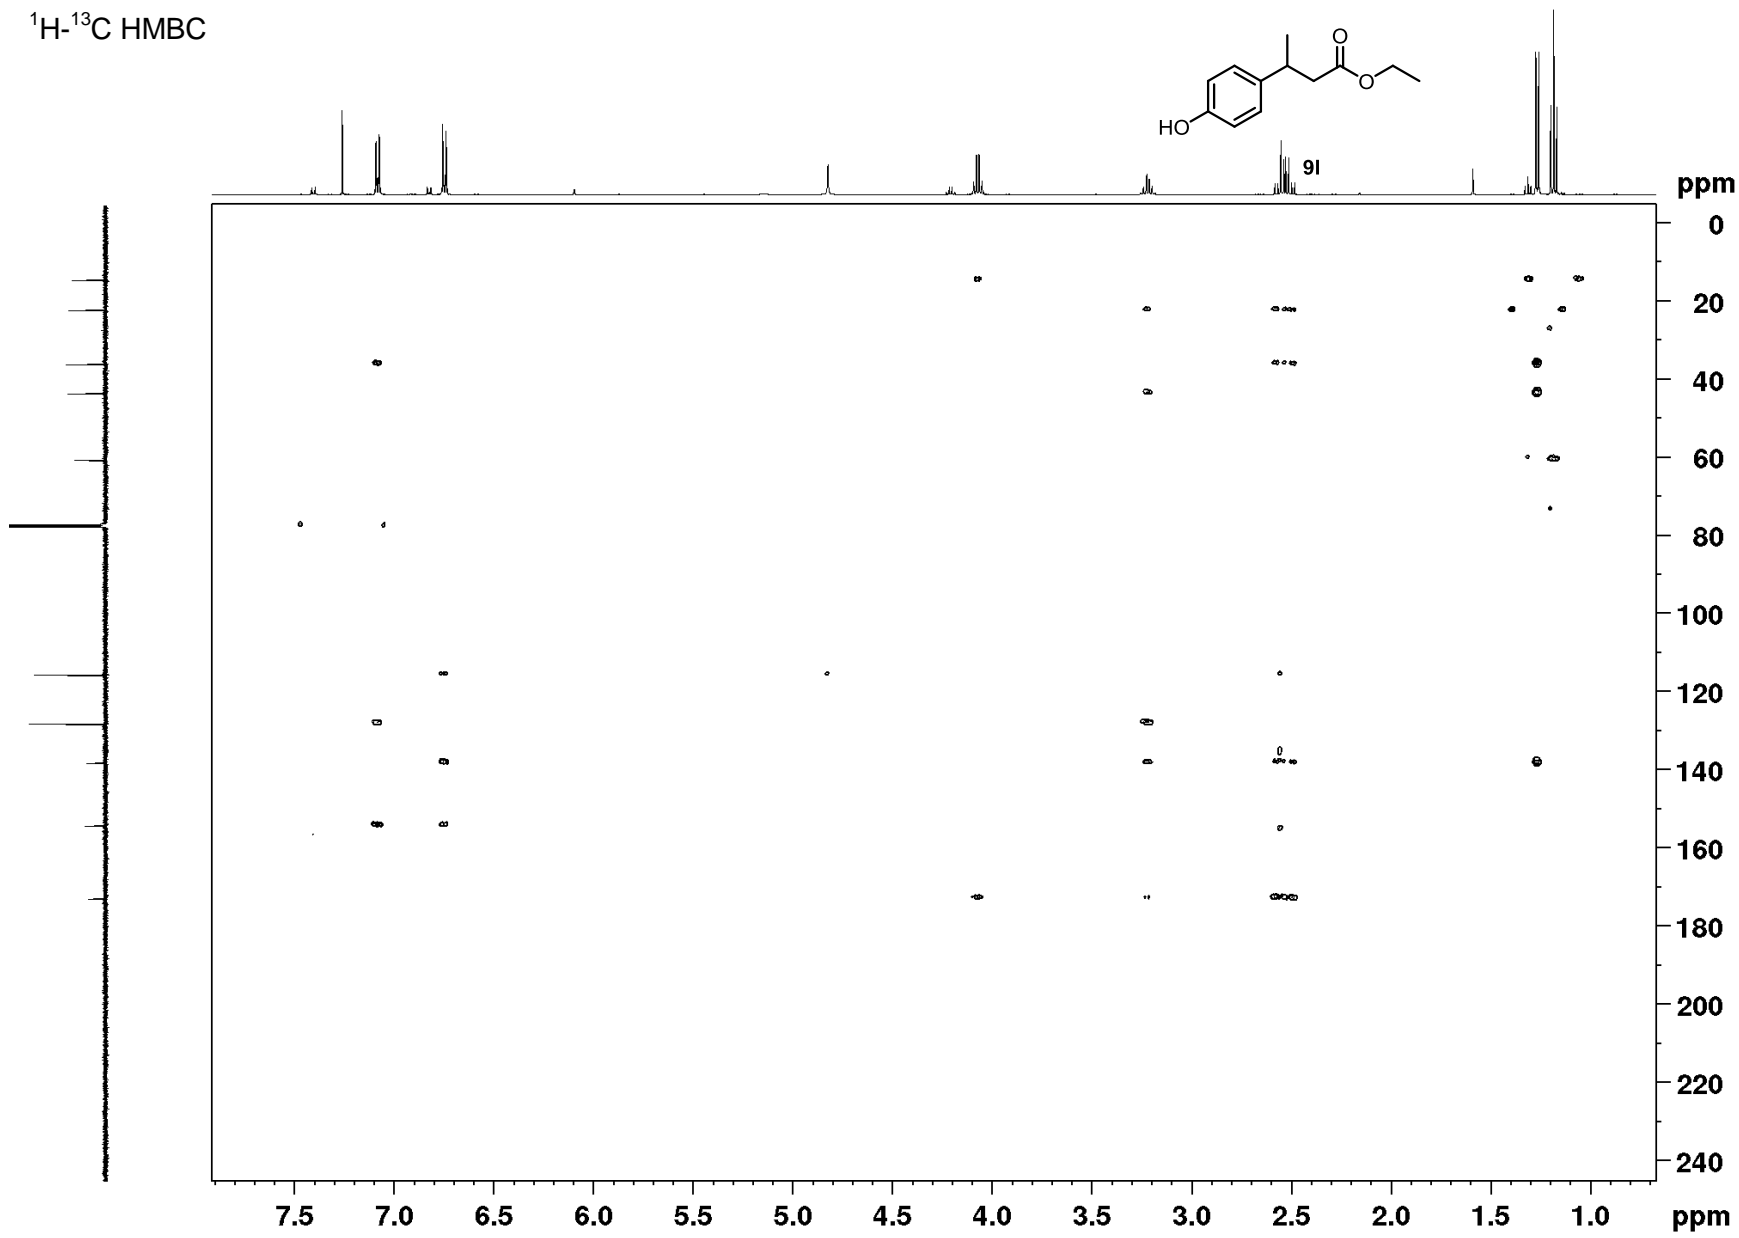

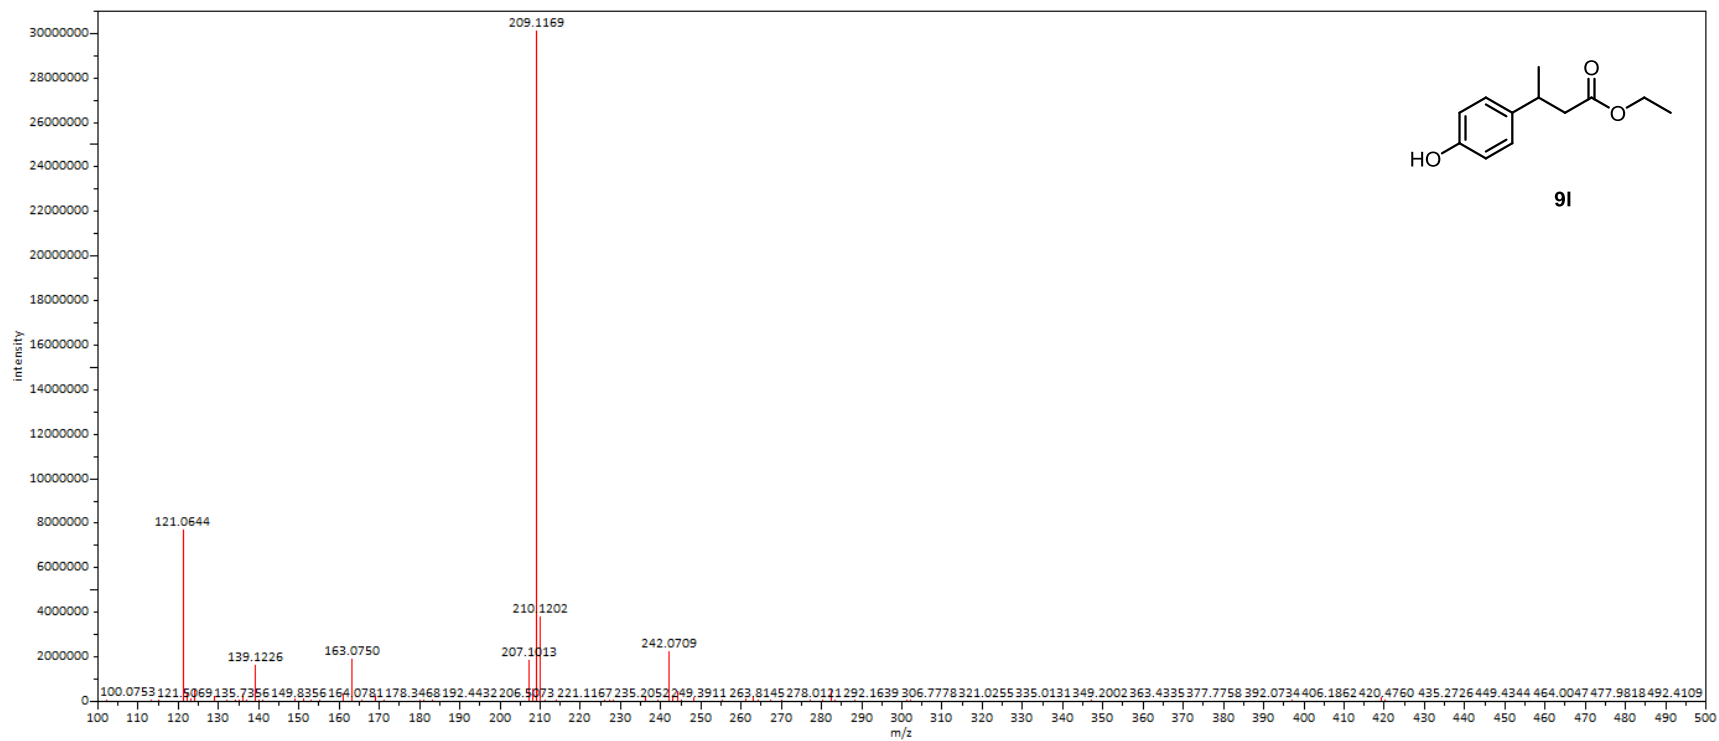

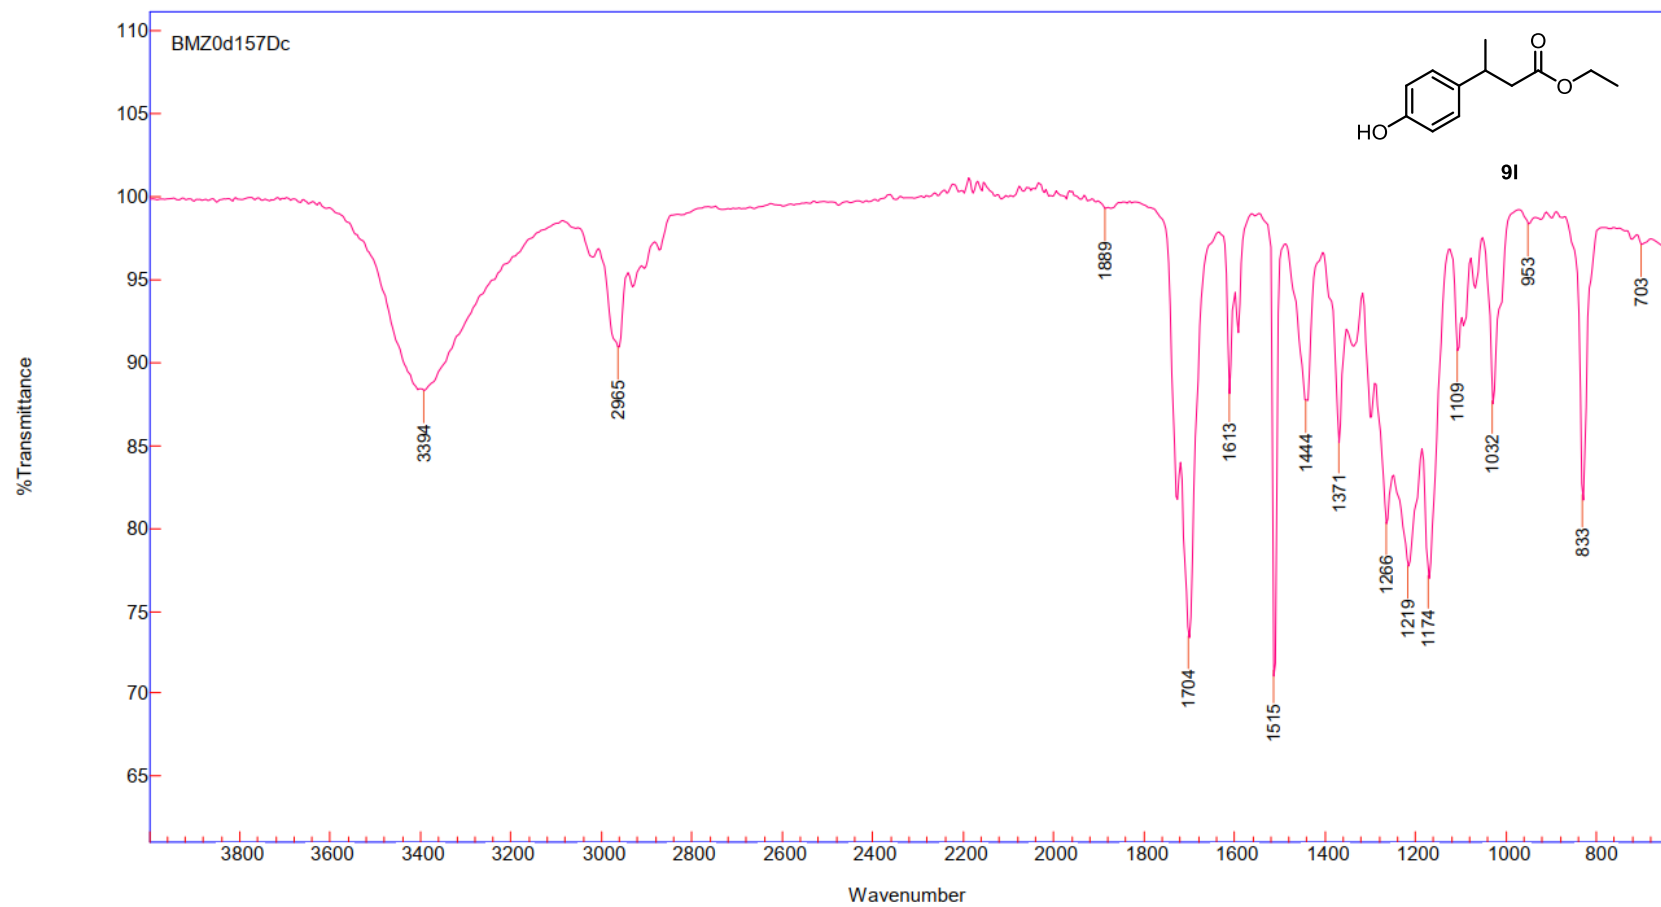

# Ethyl 3-(4-((tert-butyldiphenylsilyl)oxy)phenyl)butanoate (9m-OEt)

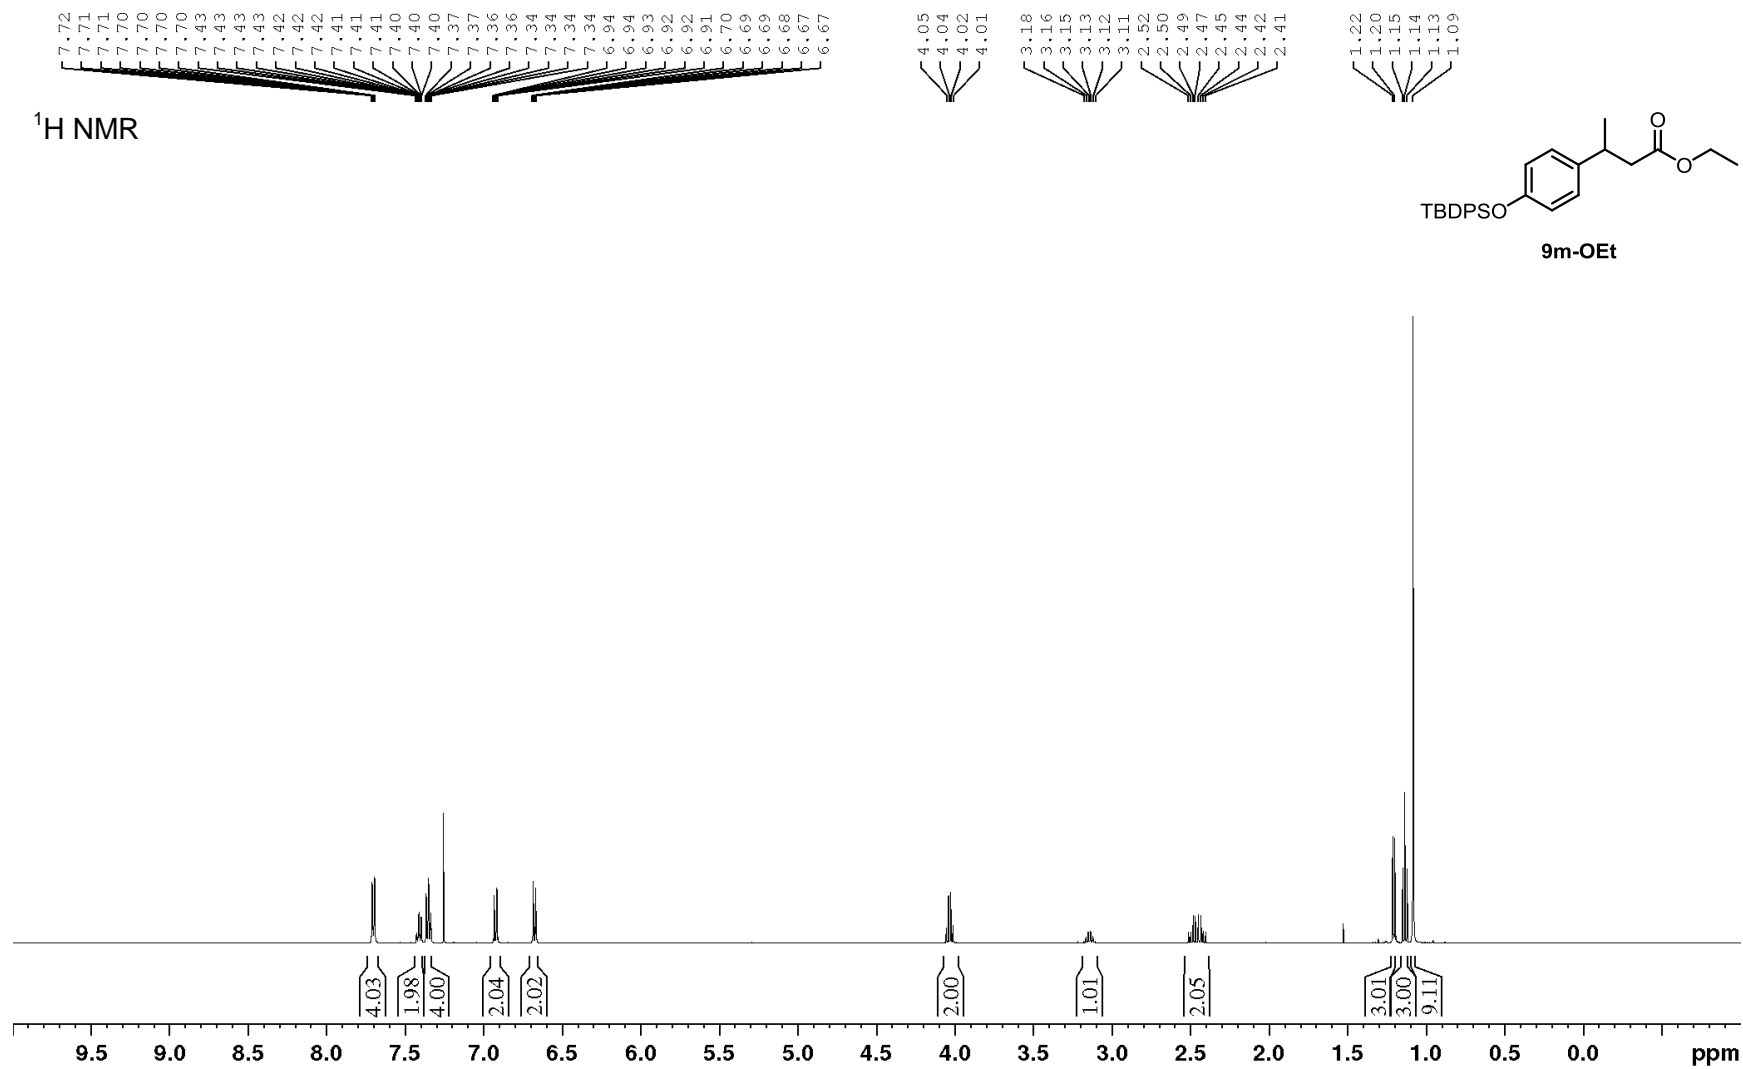

<sup>13</sup>C NMR

172.6

154.1

138.3

135.7

133.3

130.0

127.8

127.5

119.7

60.3

43.4

35.9

26.7

22.0

19.6

14.3

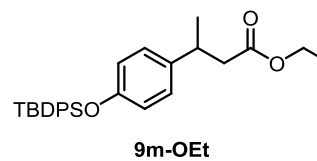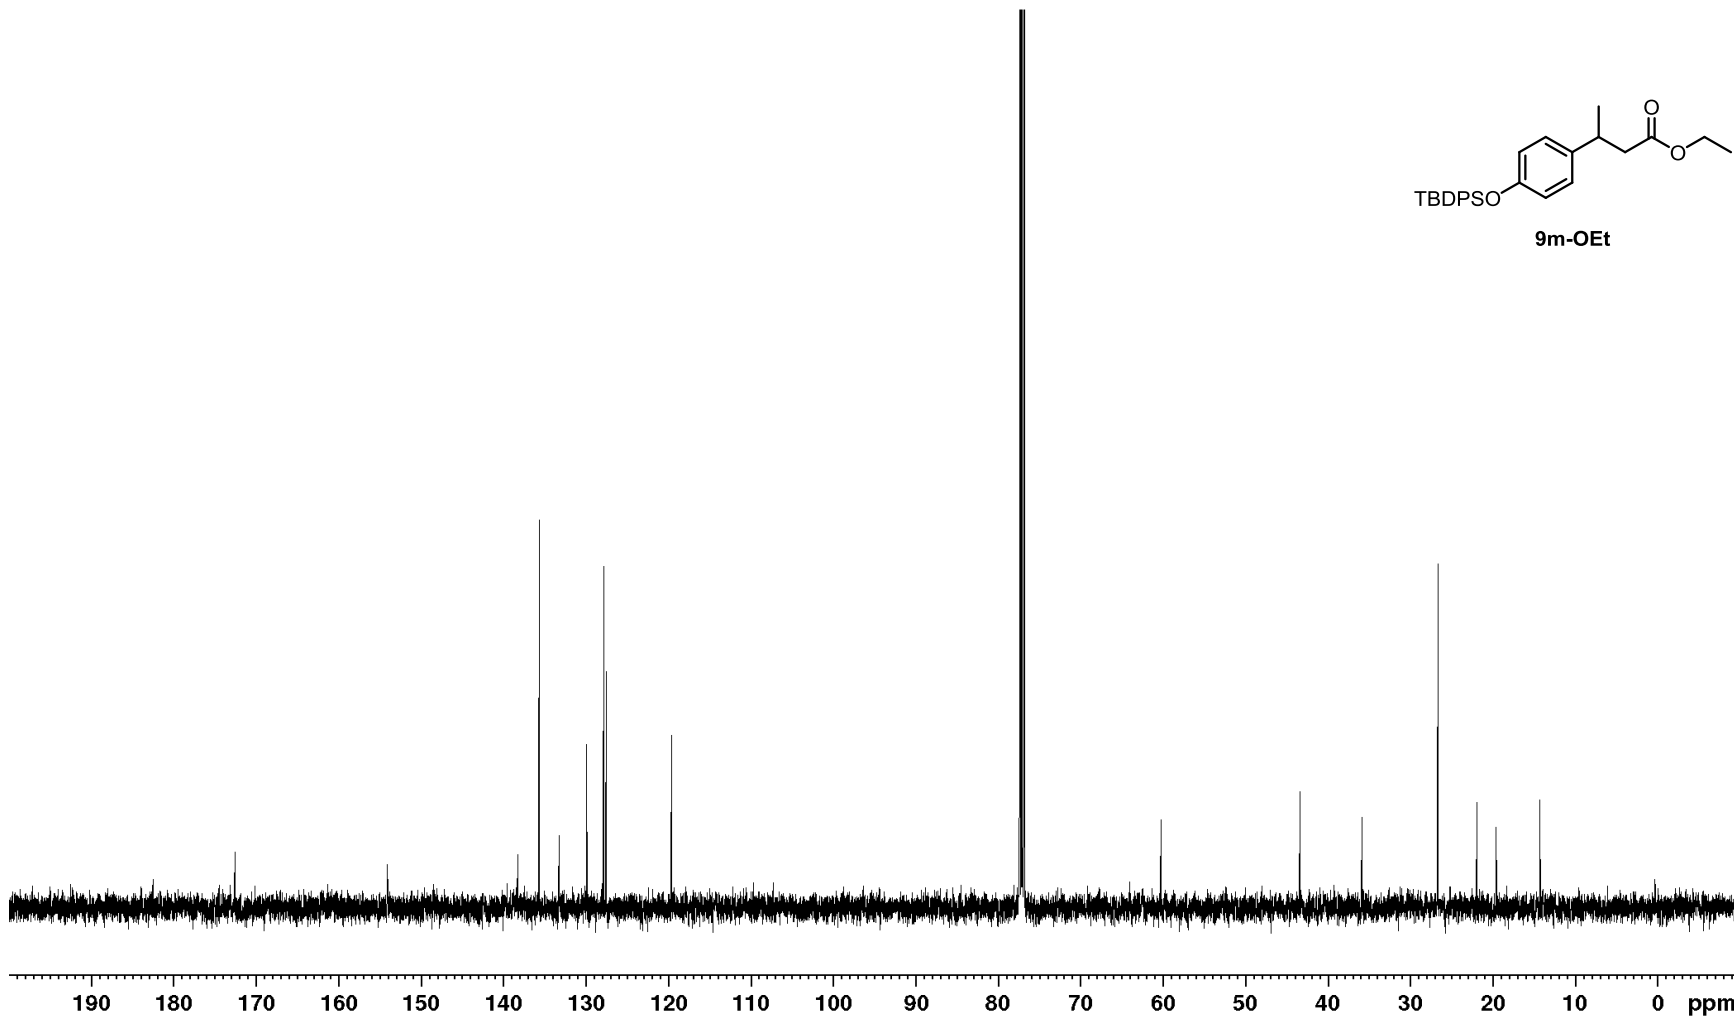

$^1\text{H}$ - $^1\text{H}$  COSY

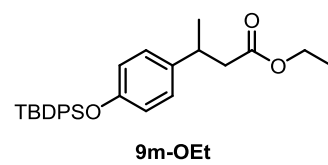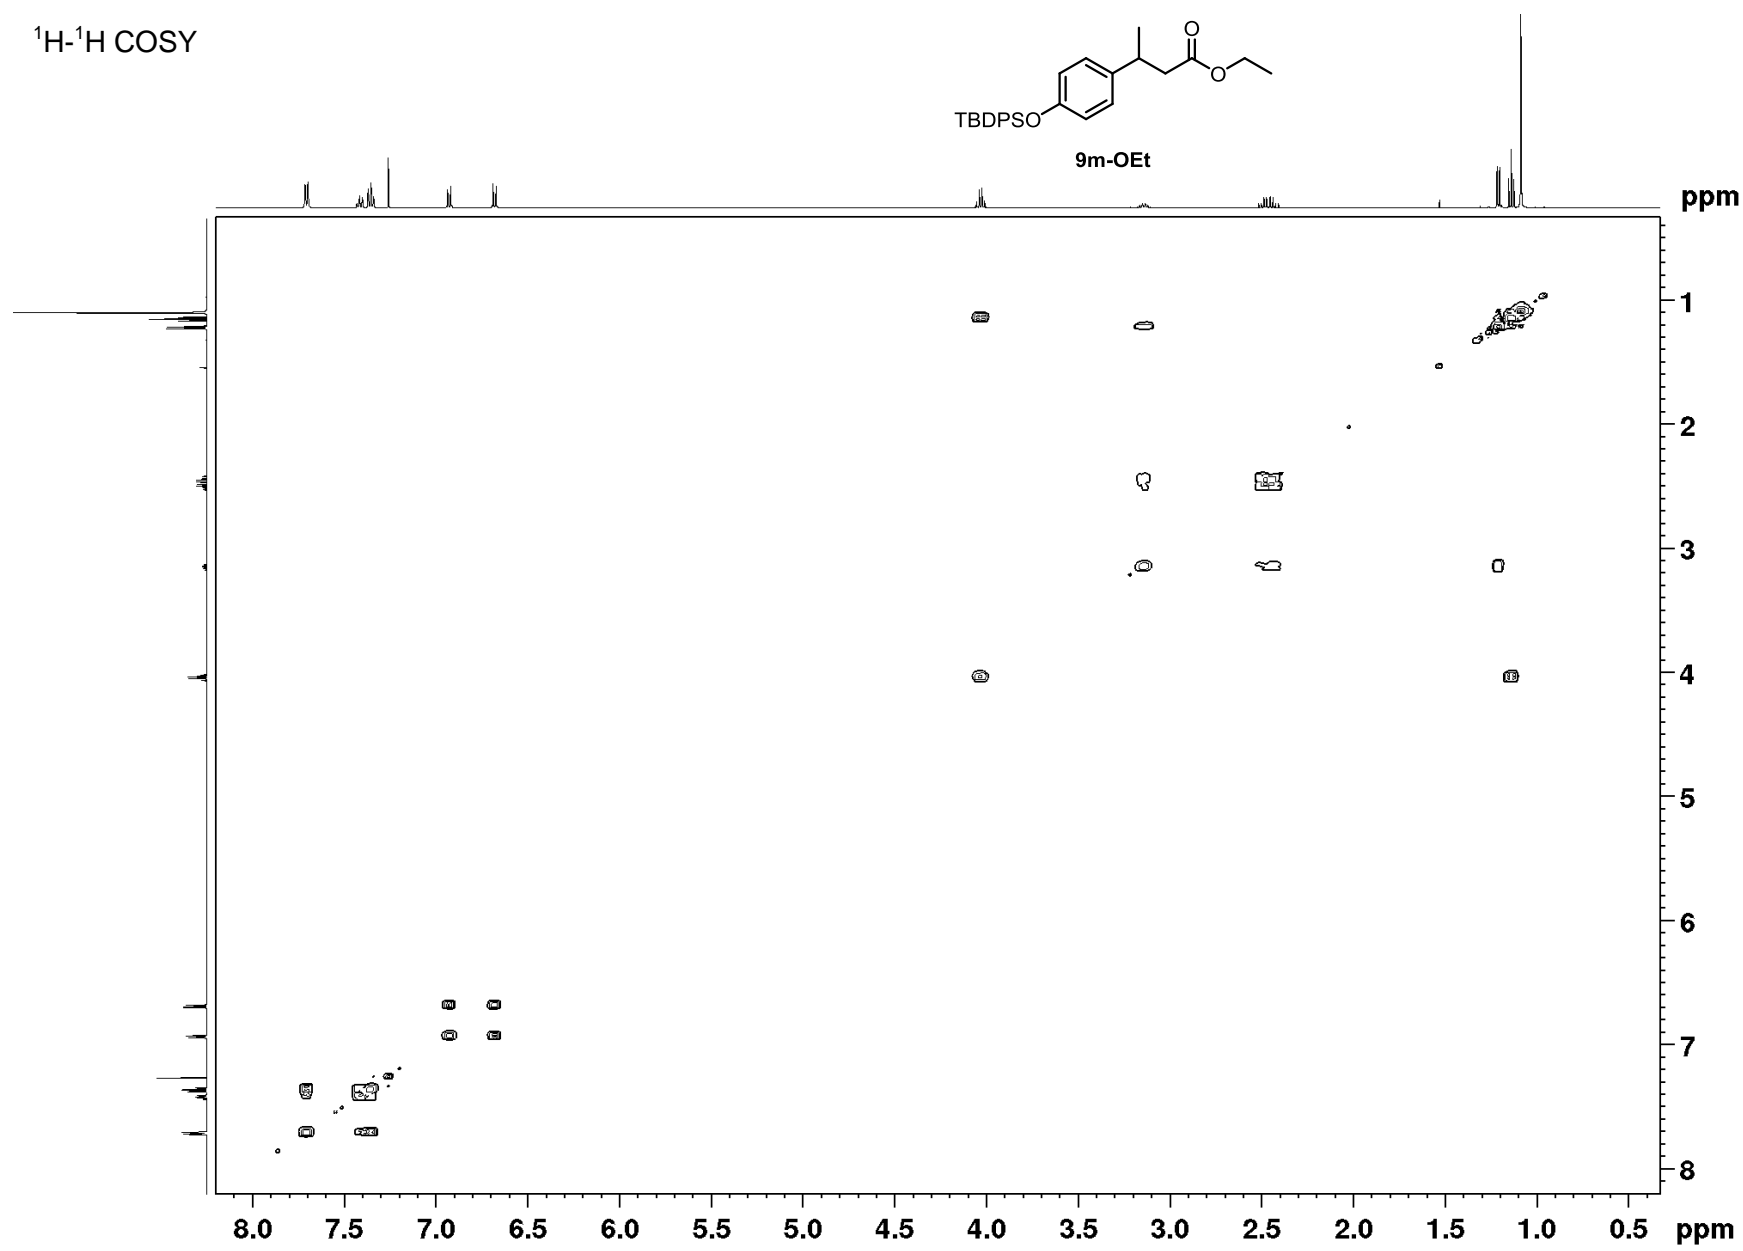



$^1\text{H}$ - $^{13}\text{C}$  HSQC

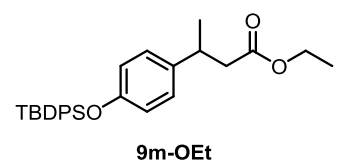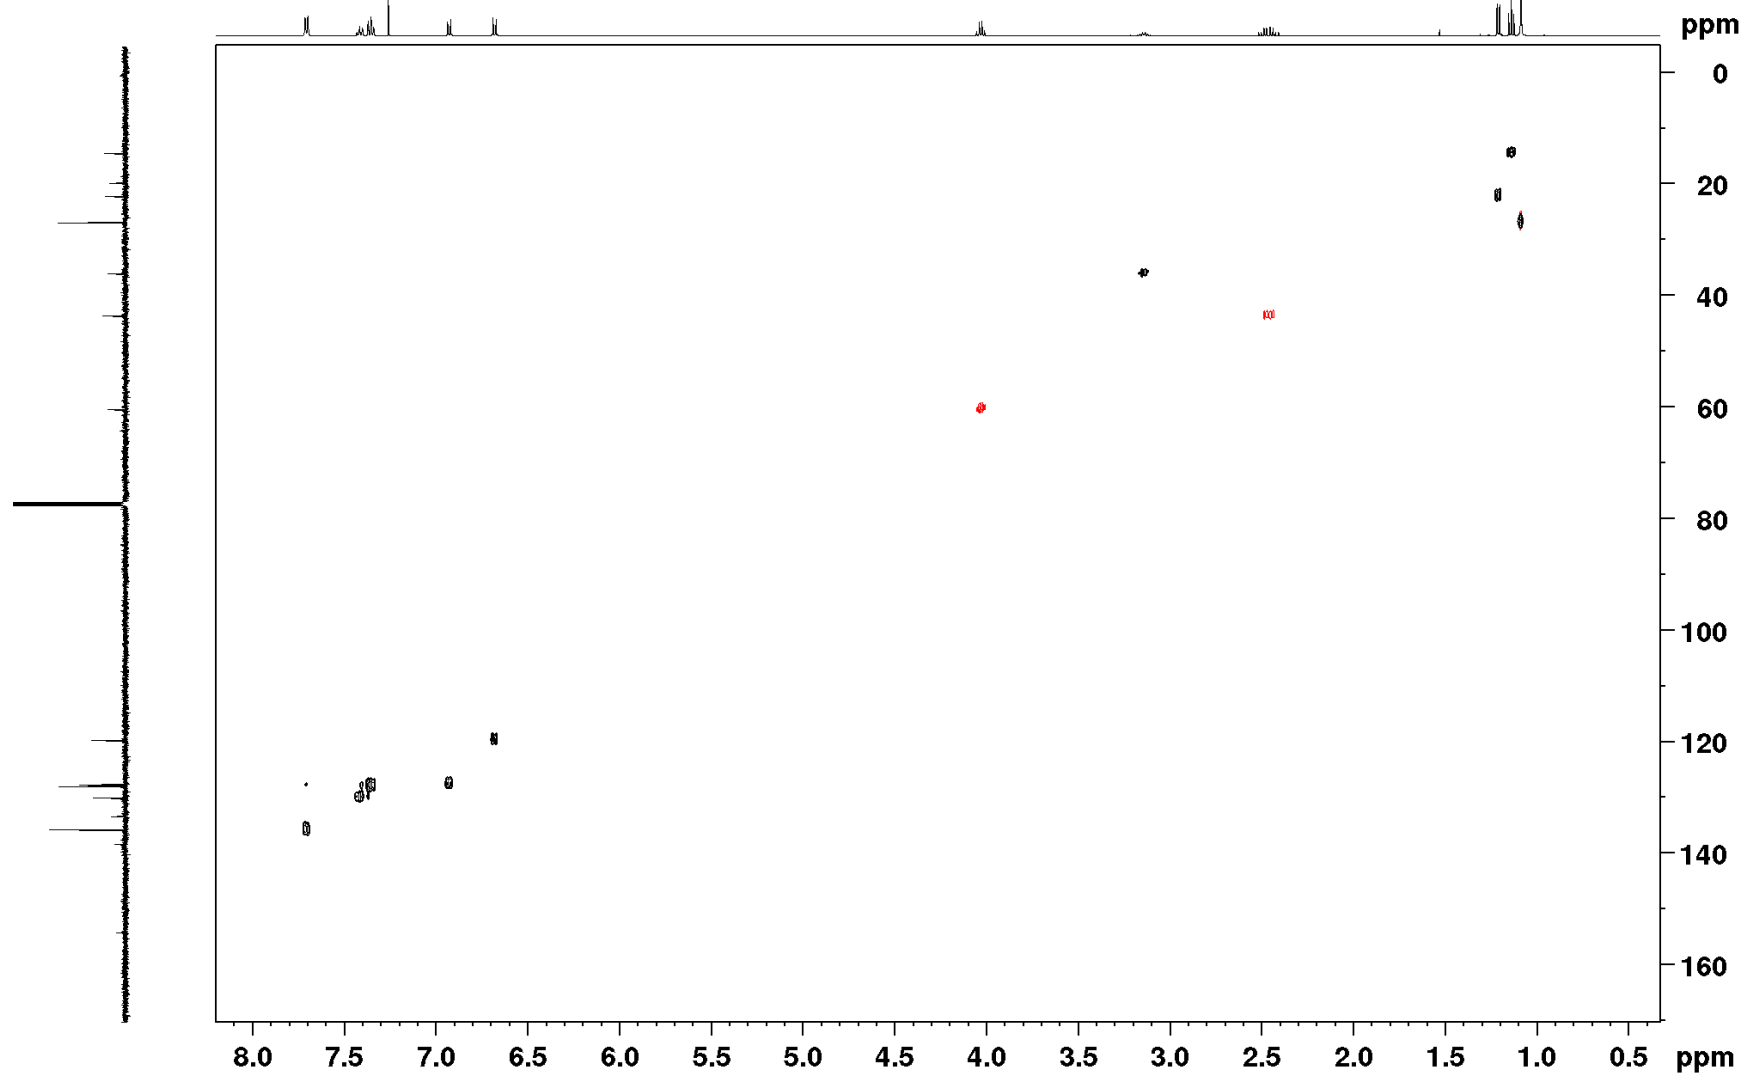

$^1\text{H}$ - $^{13}\text{C}$  HMBC

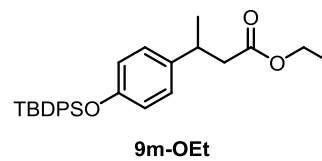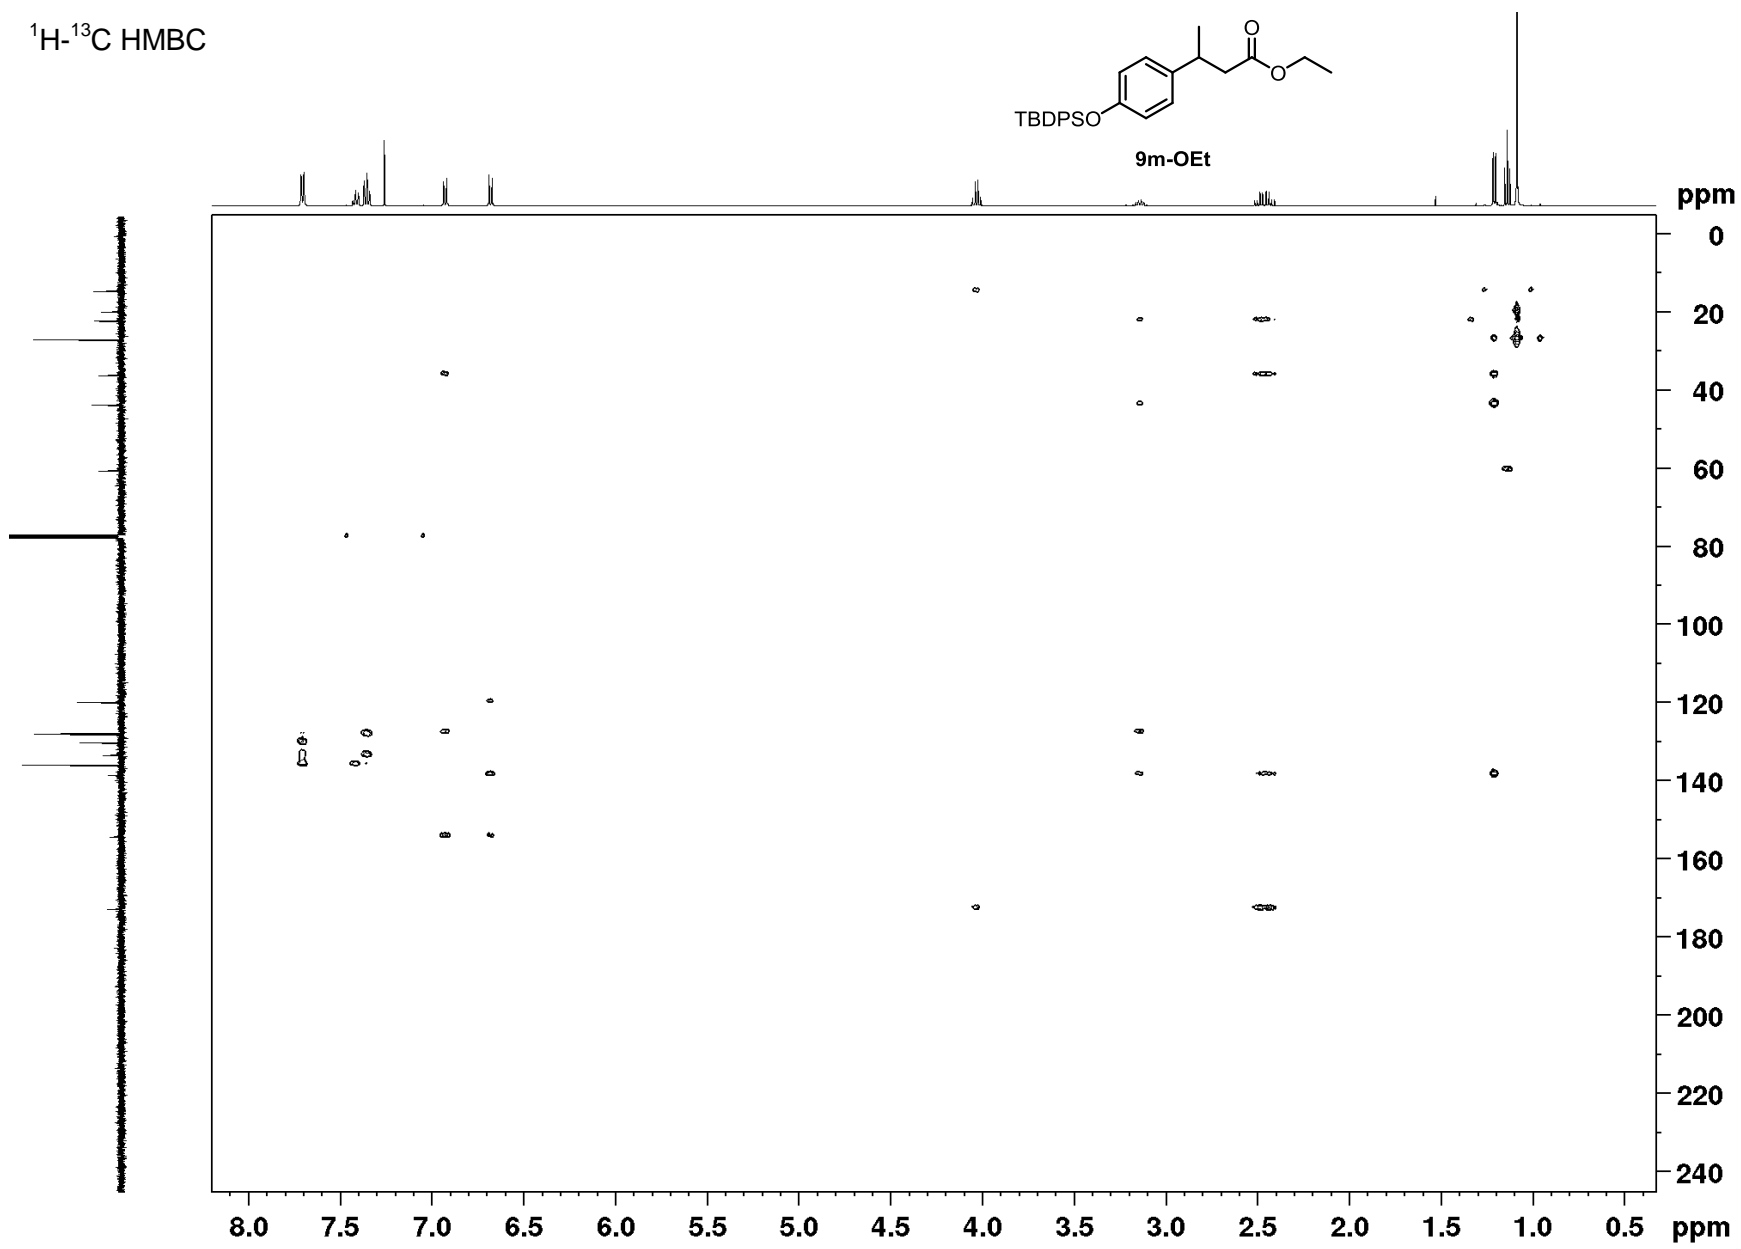

<sup>29</sup>Si DEPT

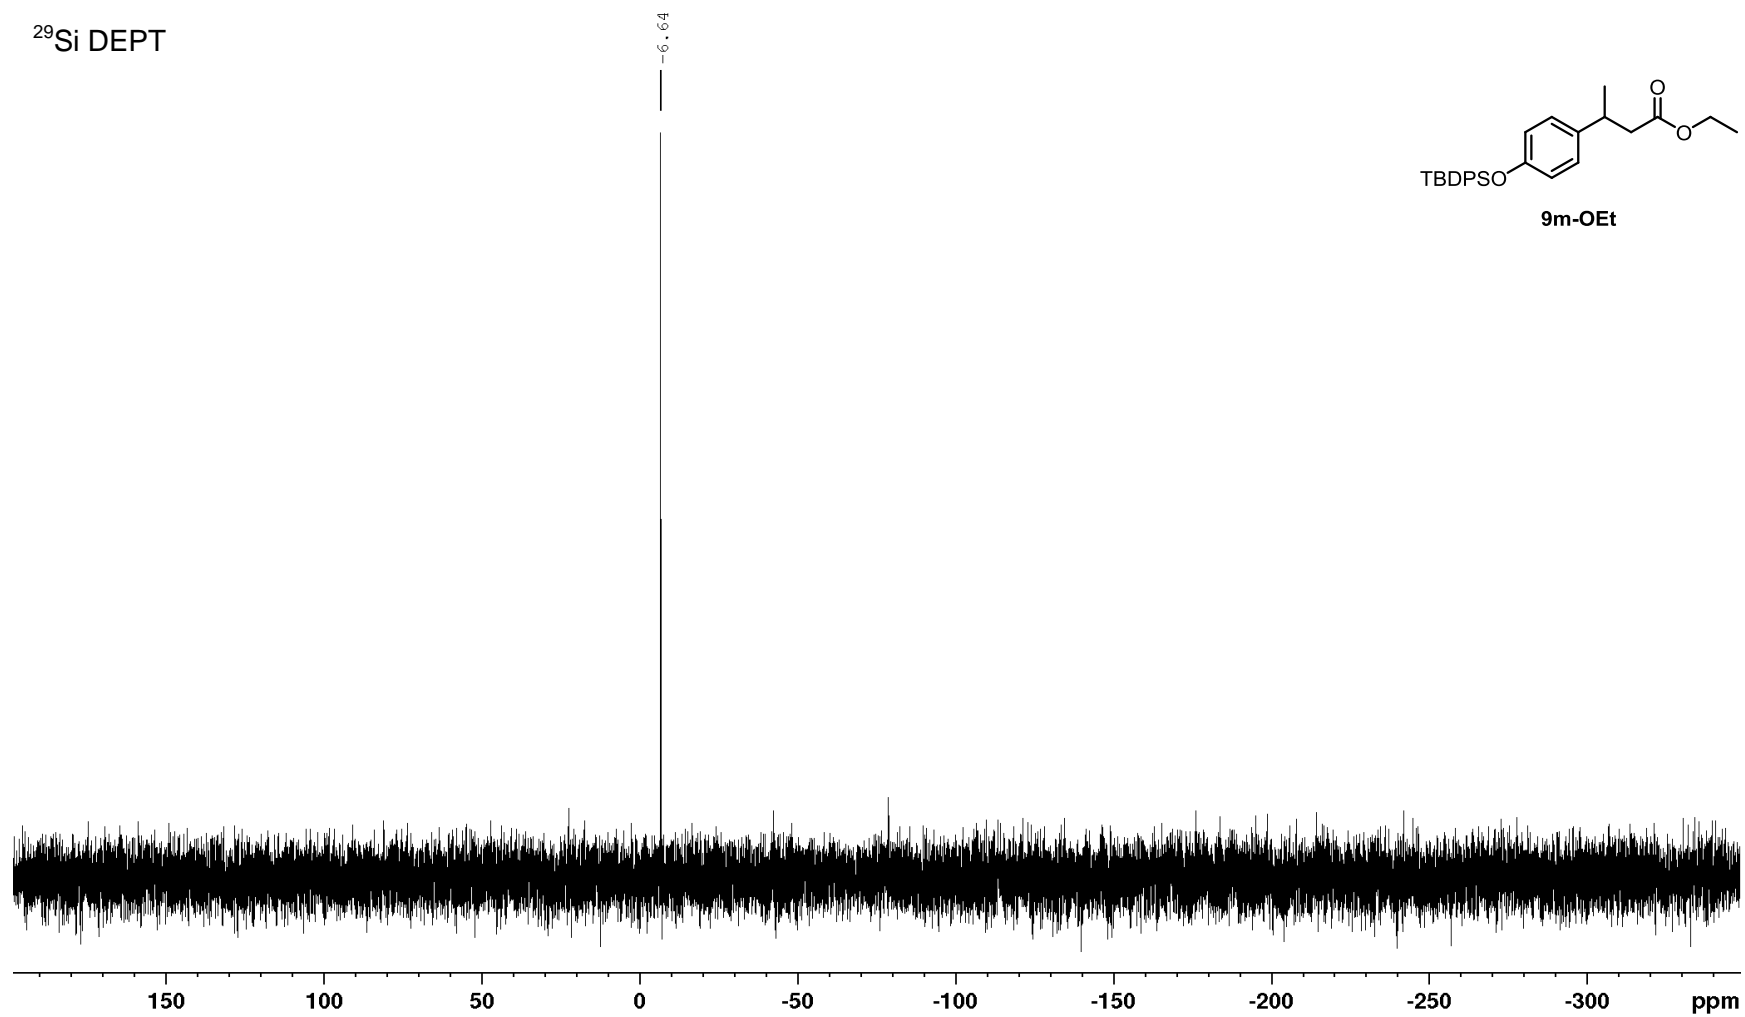

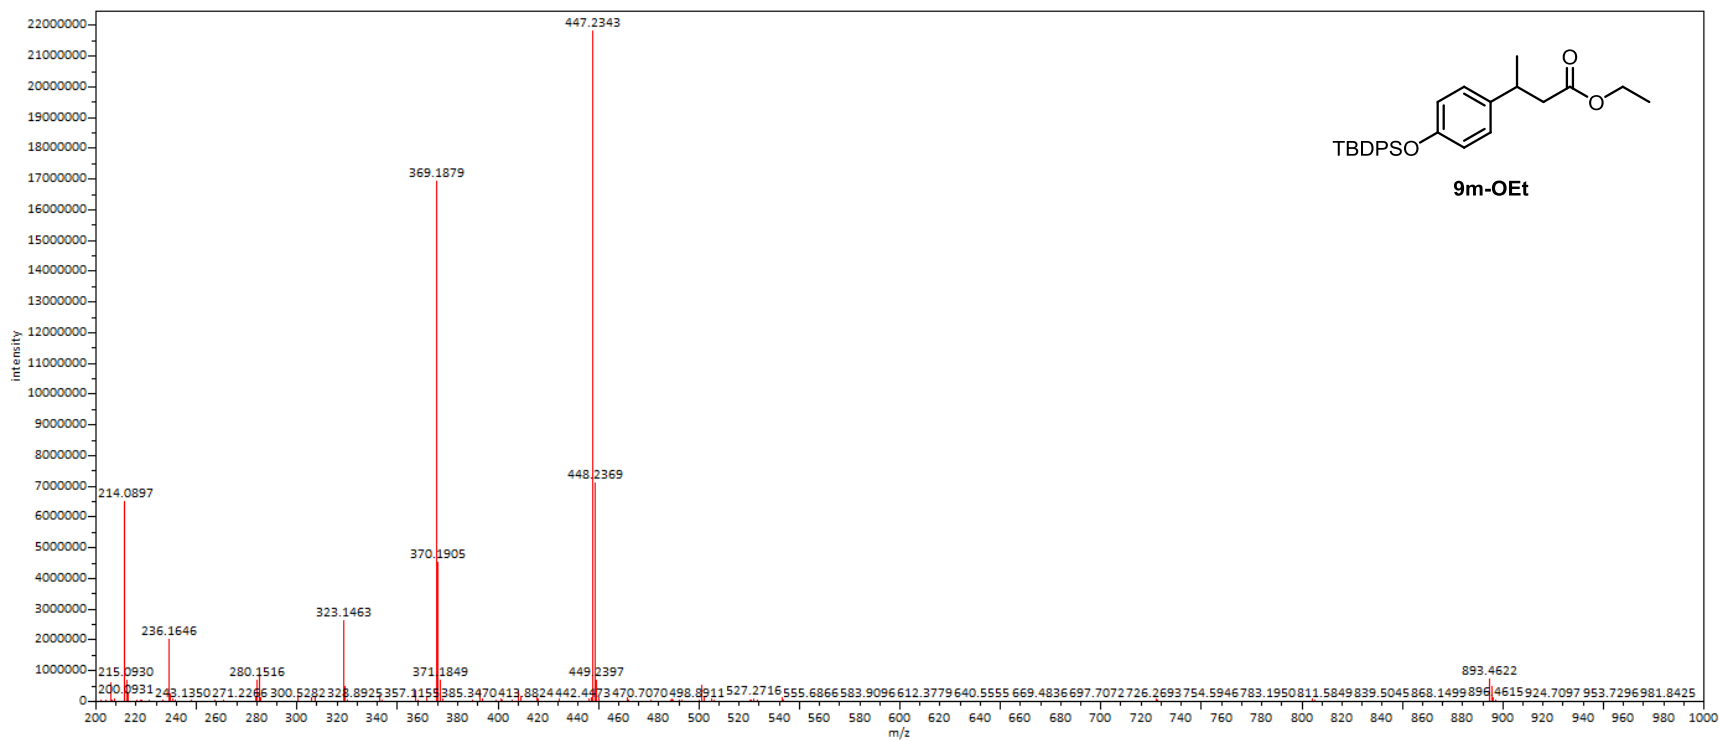

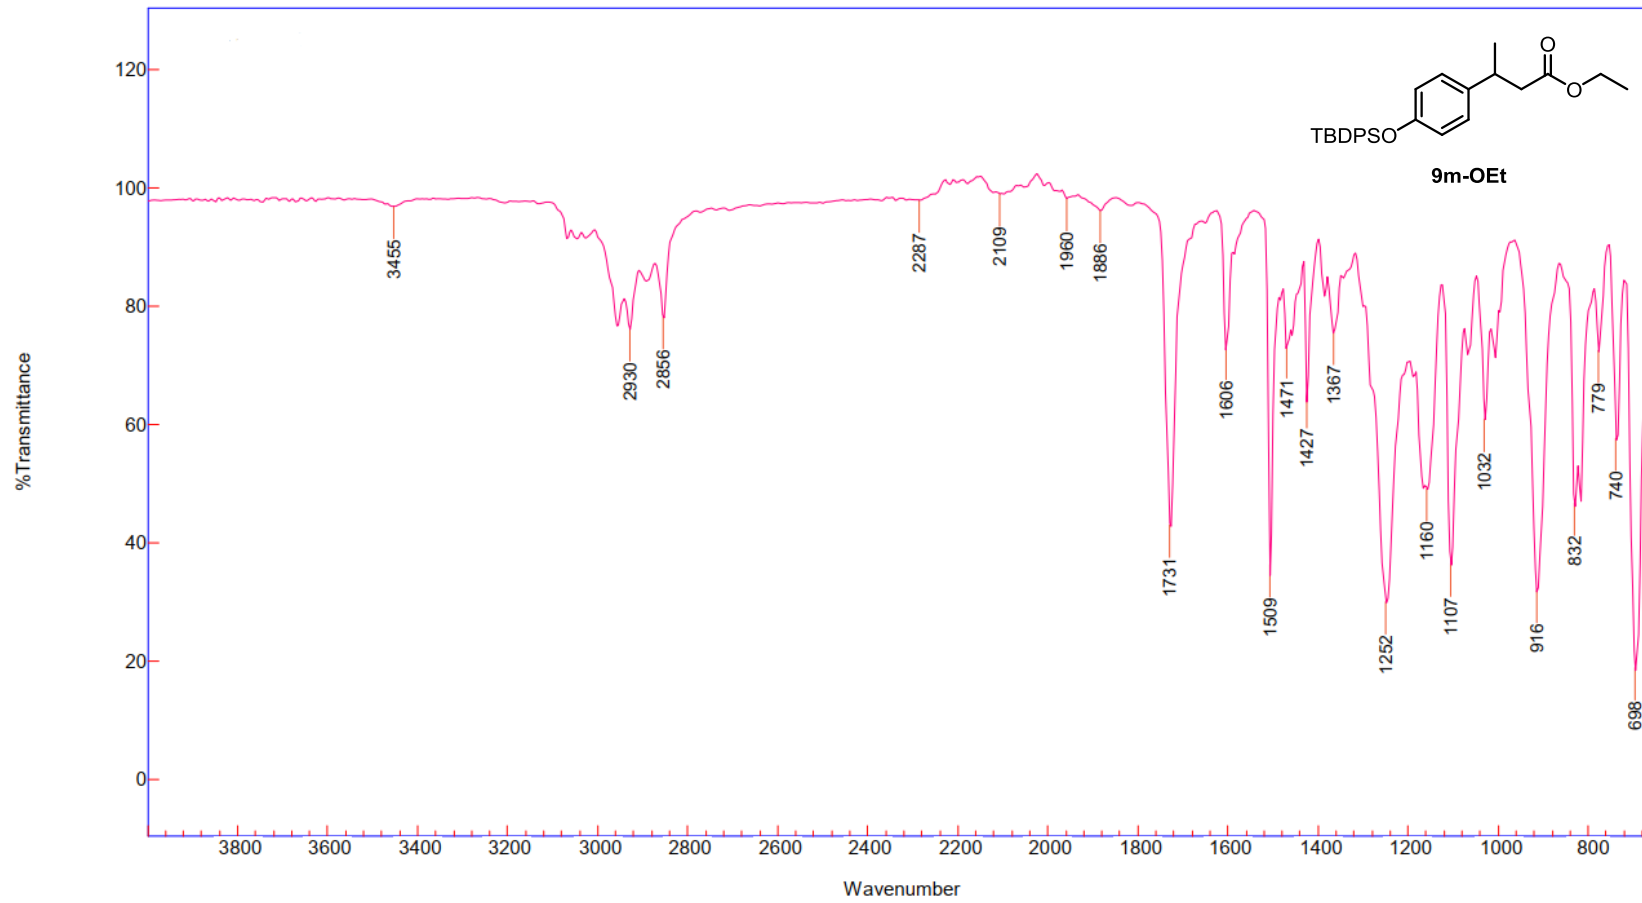

**tert-Butyl 3-(4-((tert-butyldiphenylsilyl)oxy)phenyl)butanoate (9m-OfBu)**

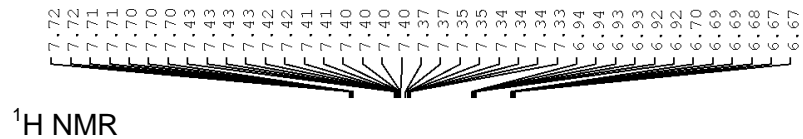

<sup>1</sup>H NMR

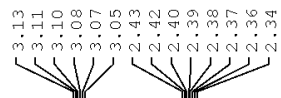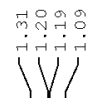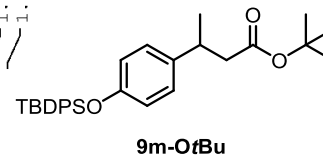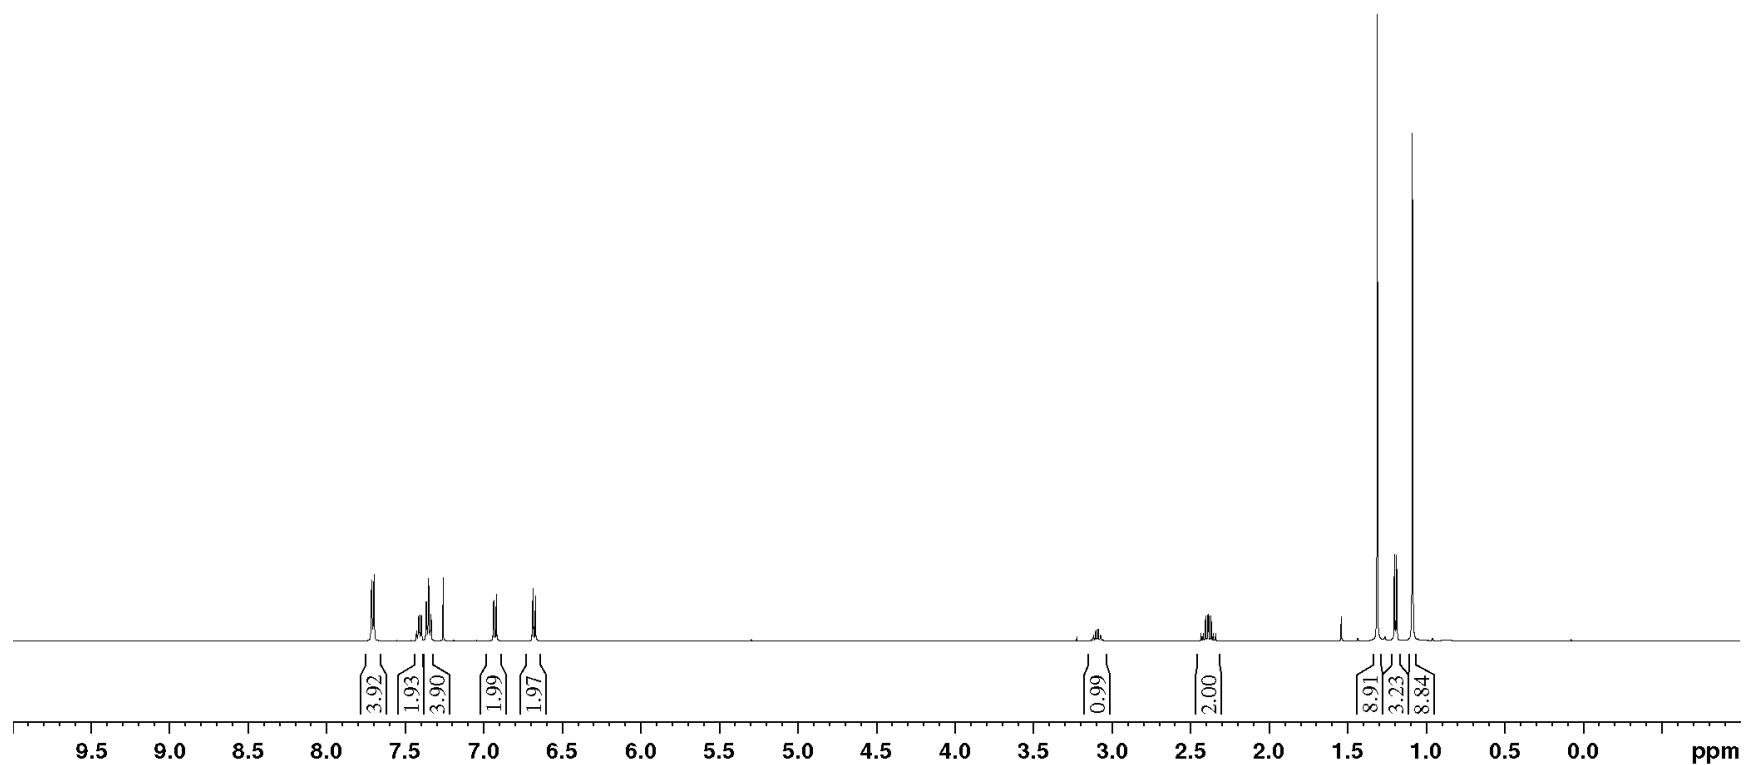

<sup>13</sup>C NMR

172.0

154.0

138.4

135.7

133.3

129.9

127.8

127.7

119.5

80.2

44.5

36.2

28.1

26.7

22.2

19.6

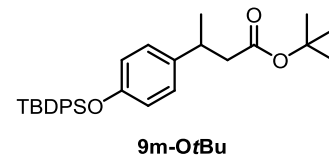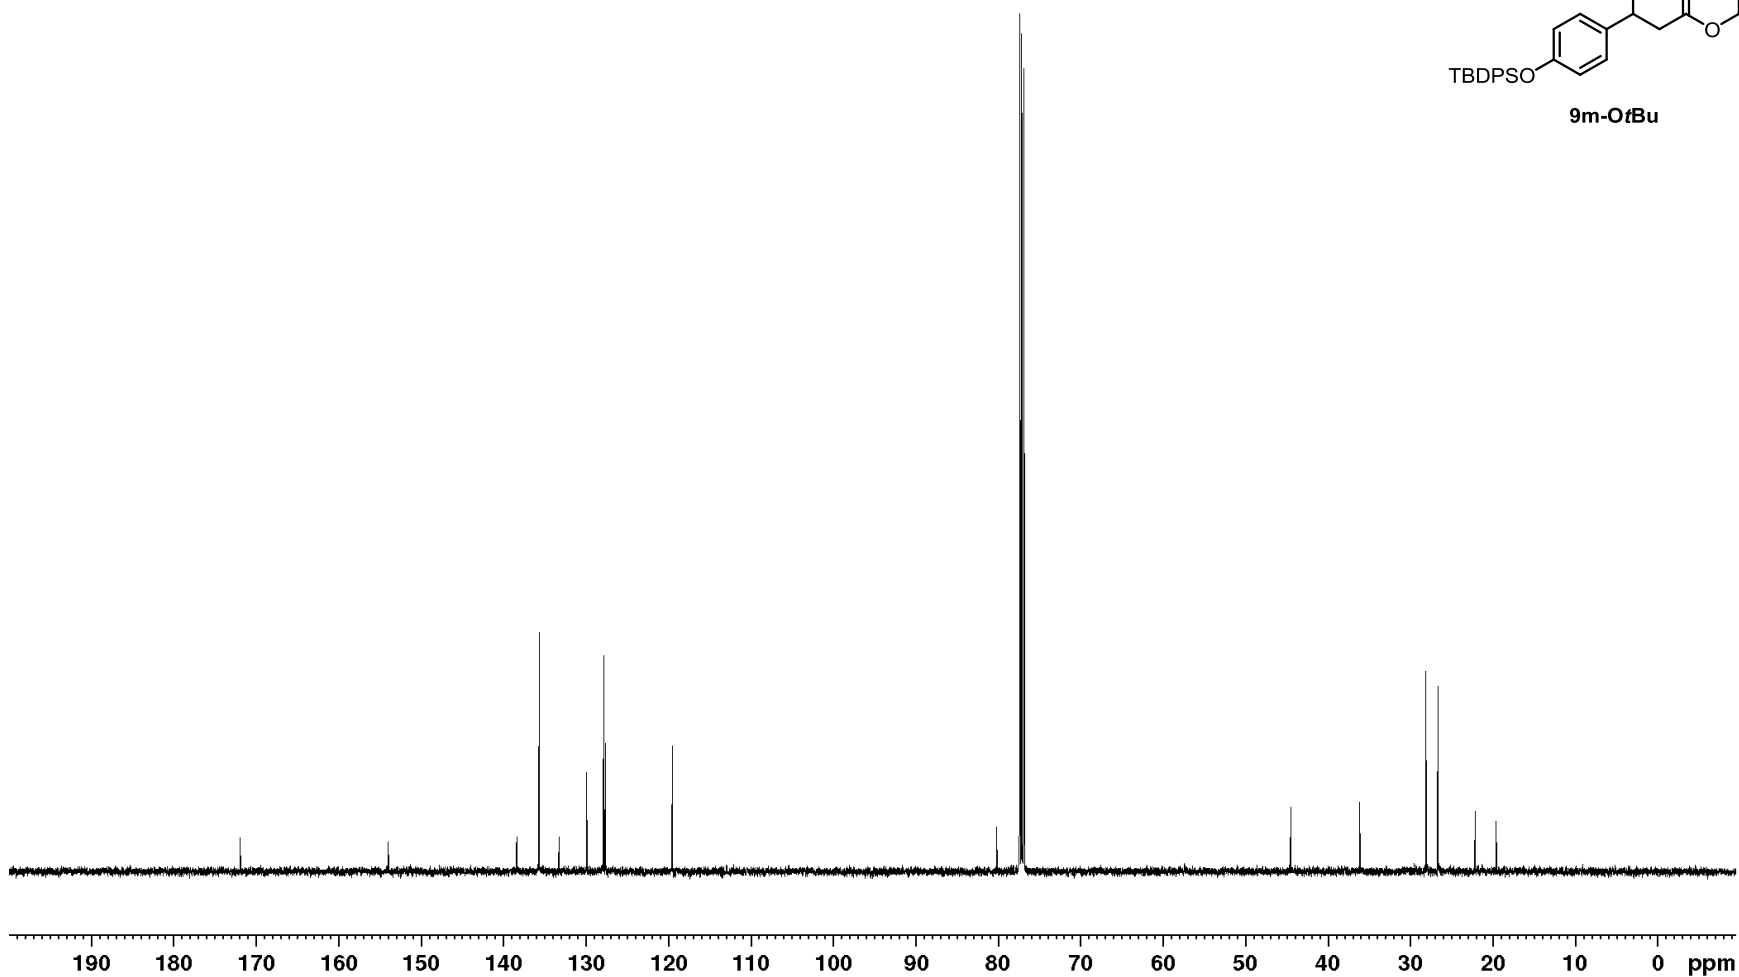

$^1\text{H}$ - $^1\text{H}$  COSY

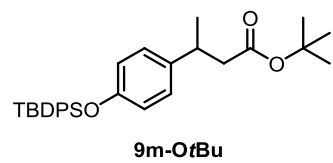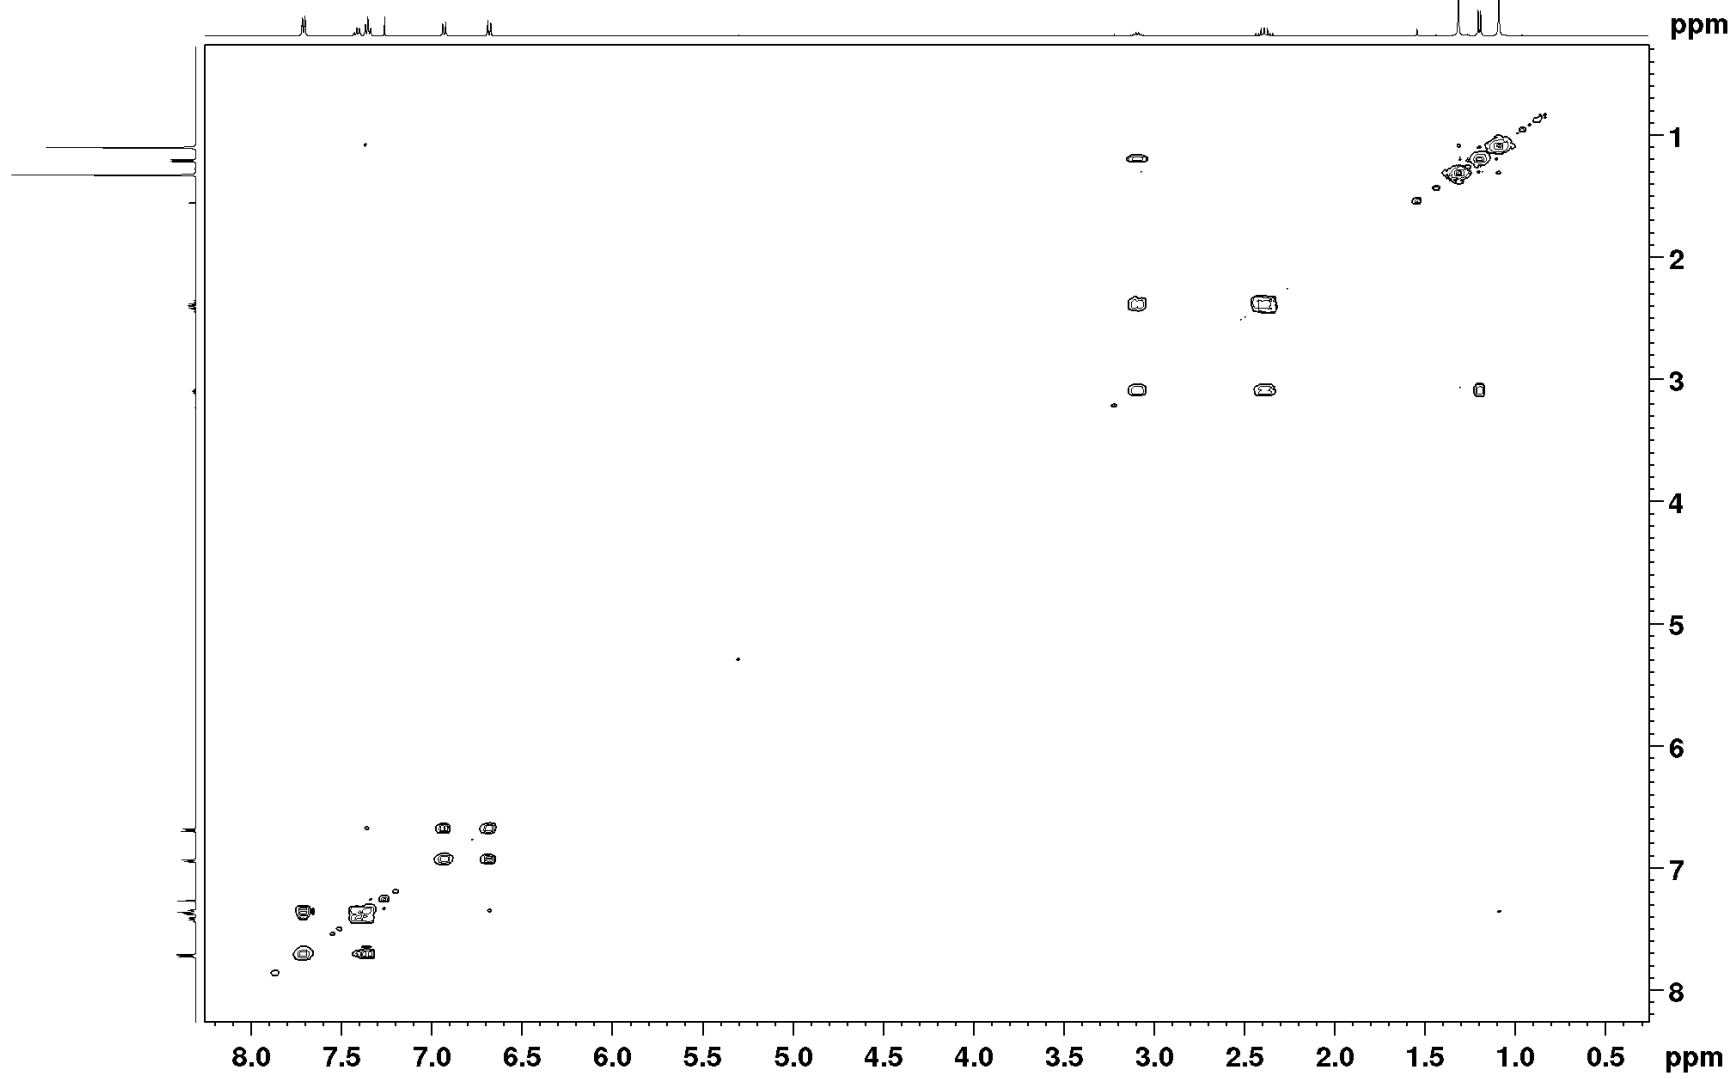



$^1\text{H}$ - $^{13}\text{C}$  HSQC

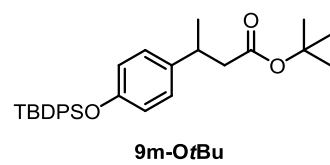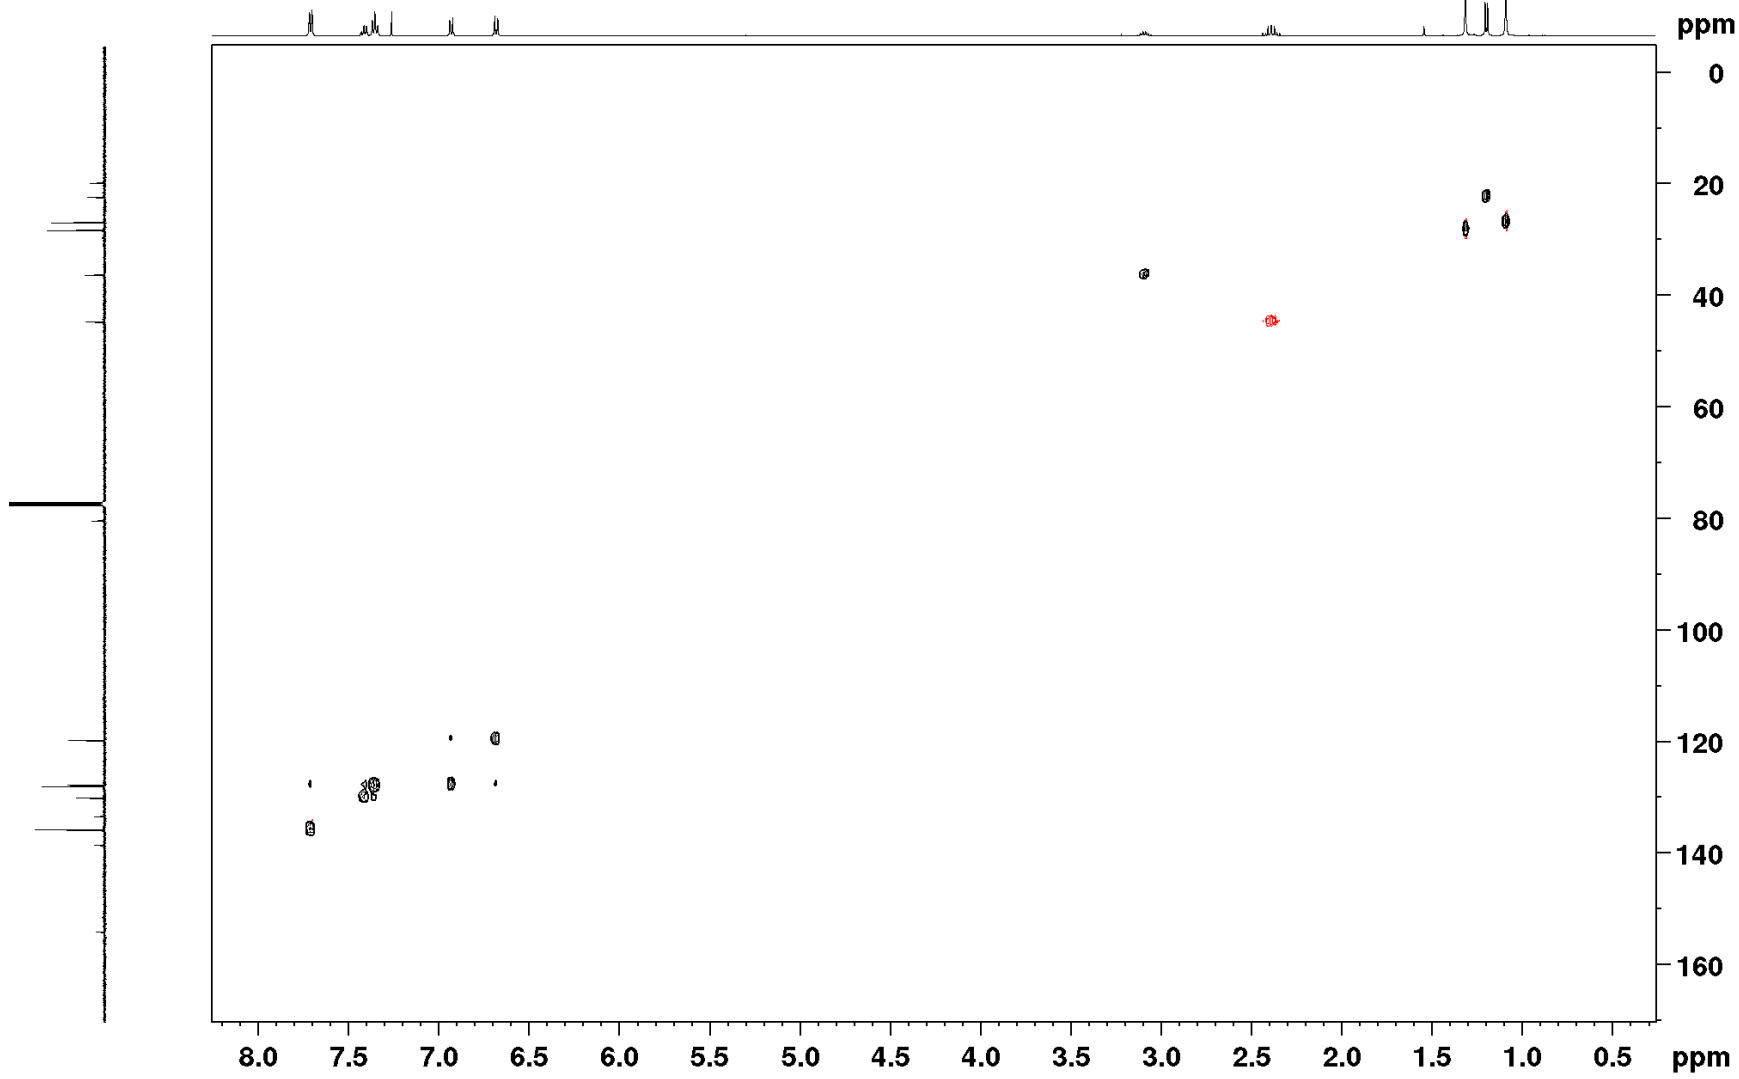

$^1\text{H}$ - $^{13}\text{C}$  HMBC

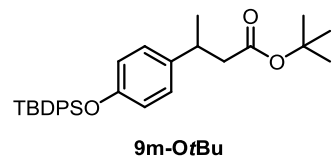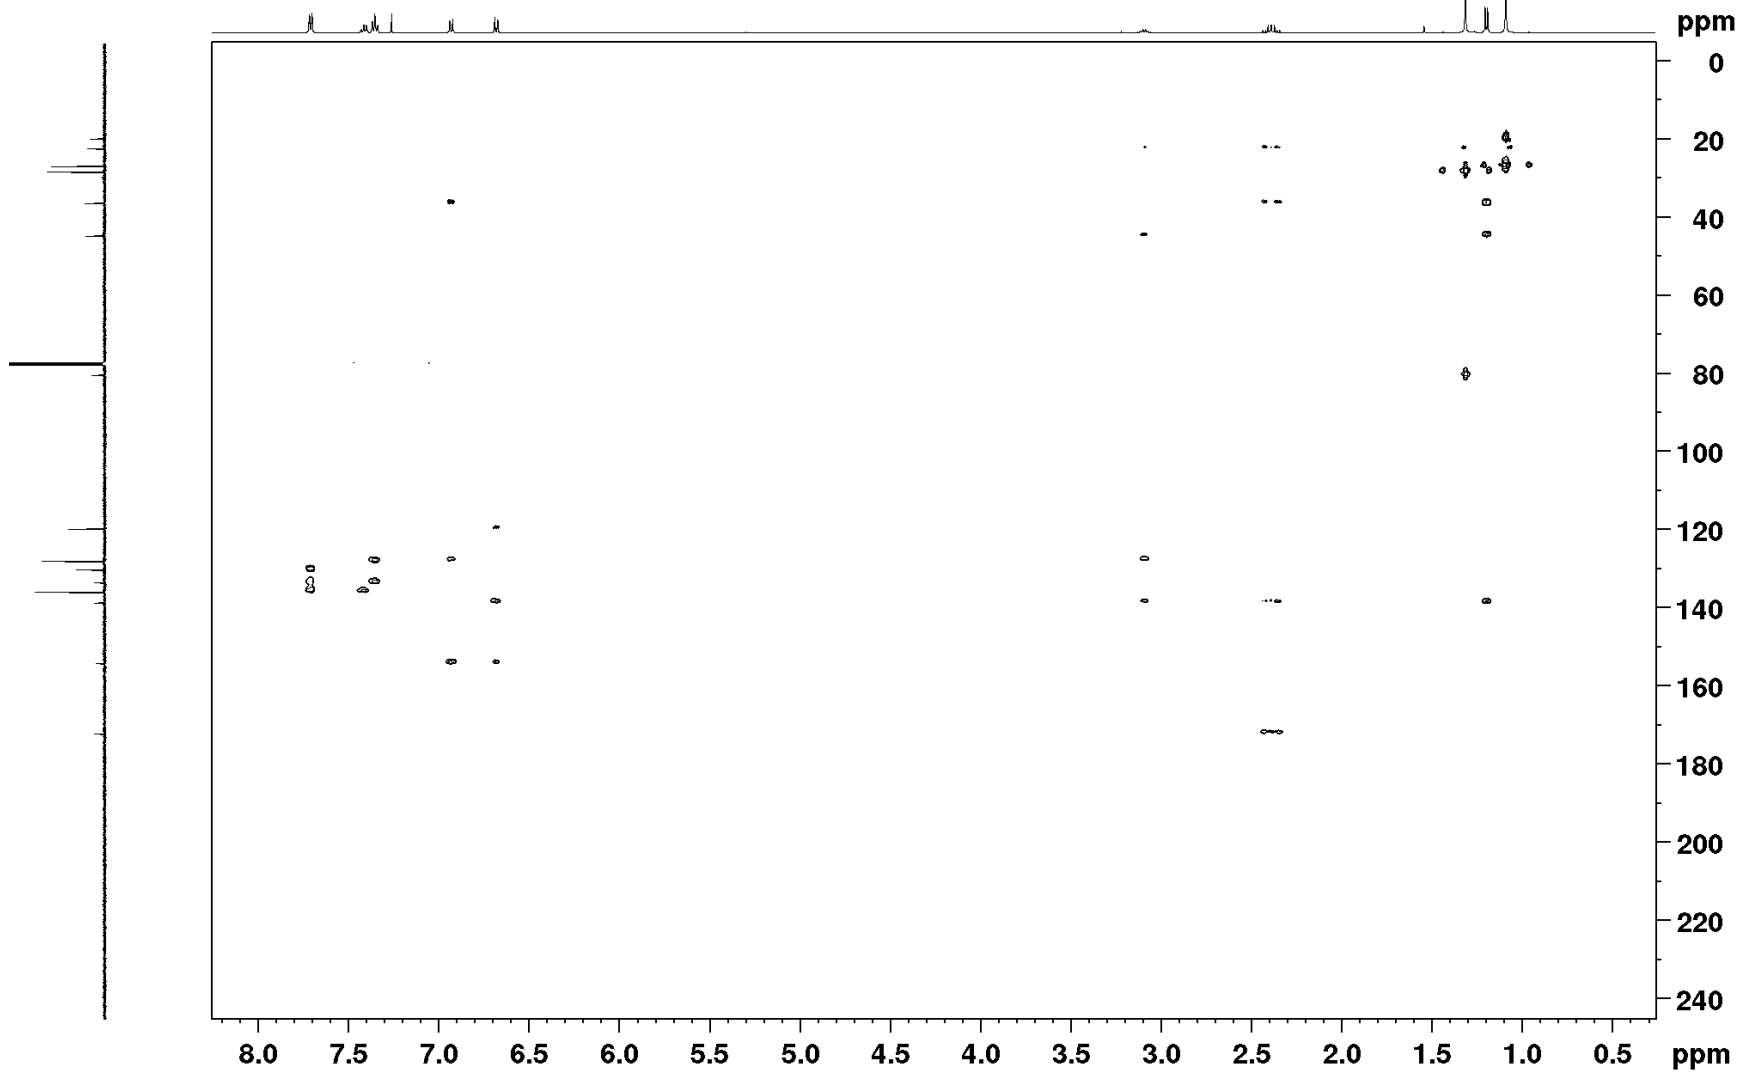

<sup>29</sup>Si DEPT

-6.77

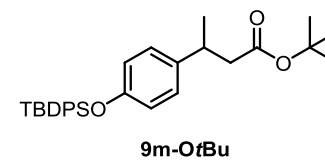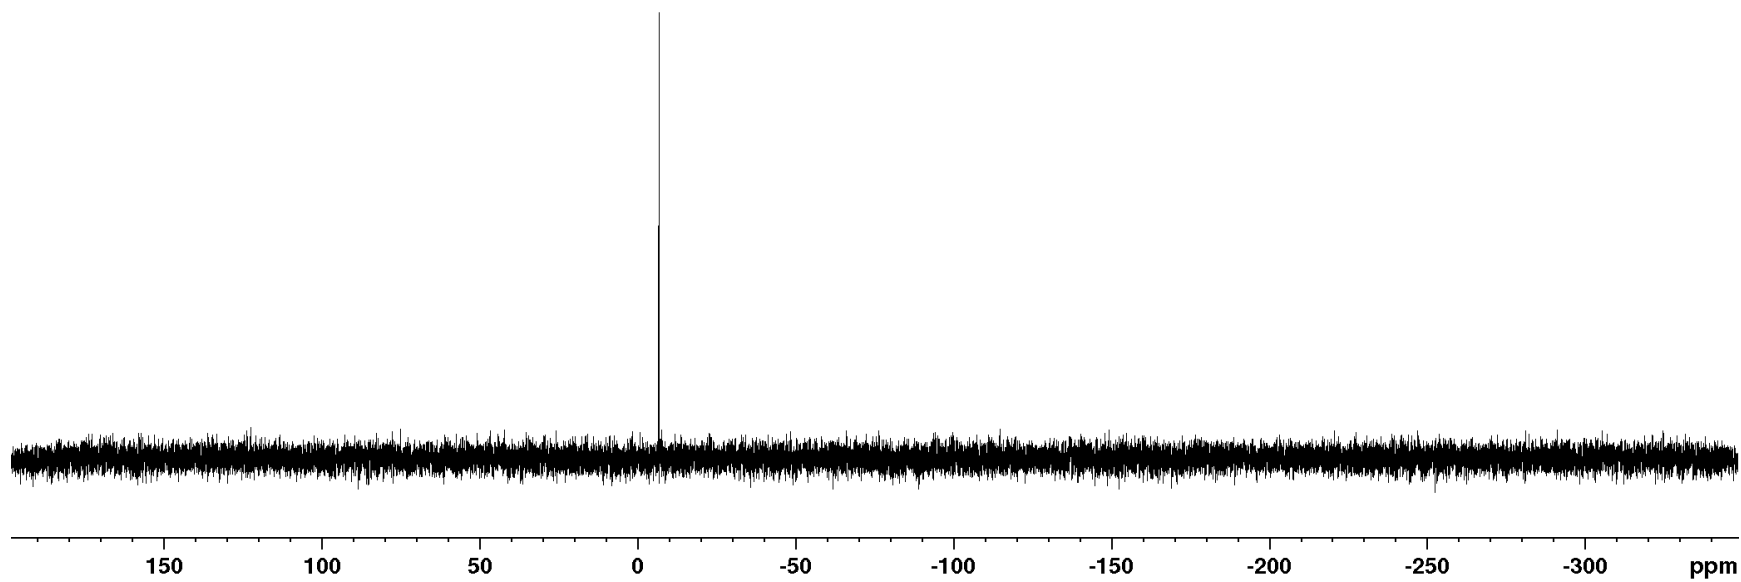

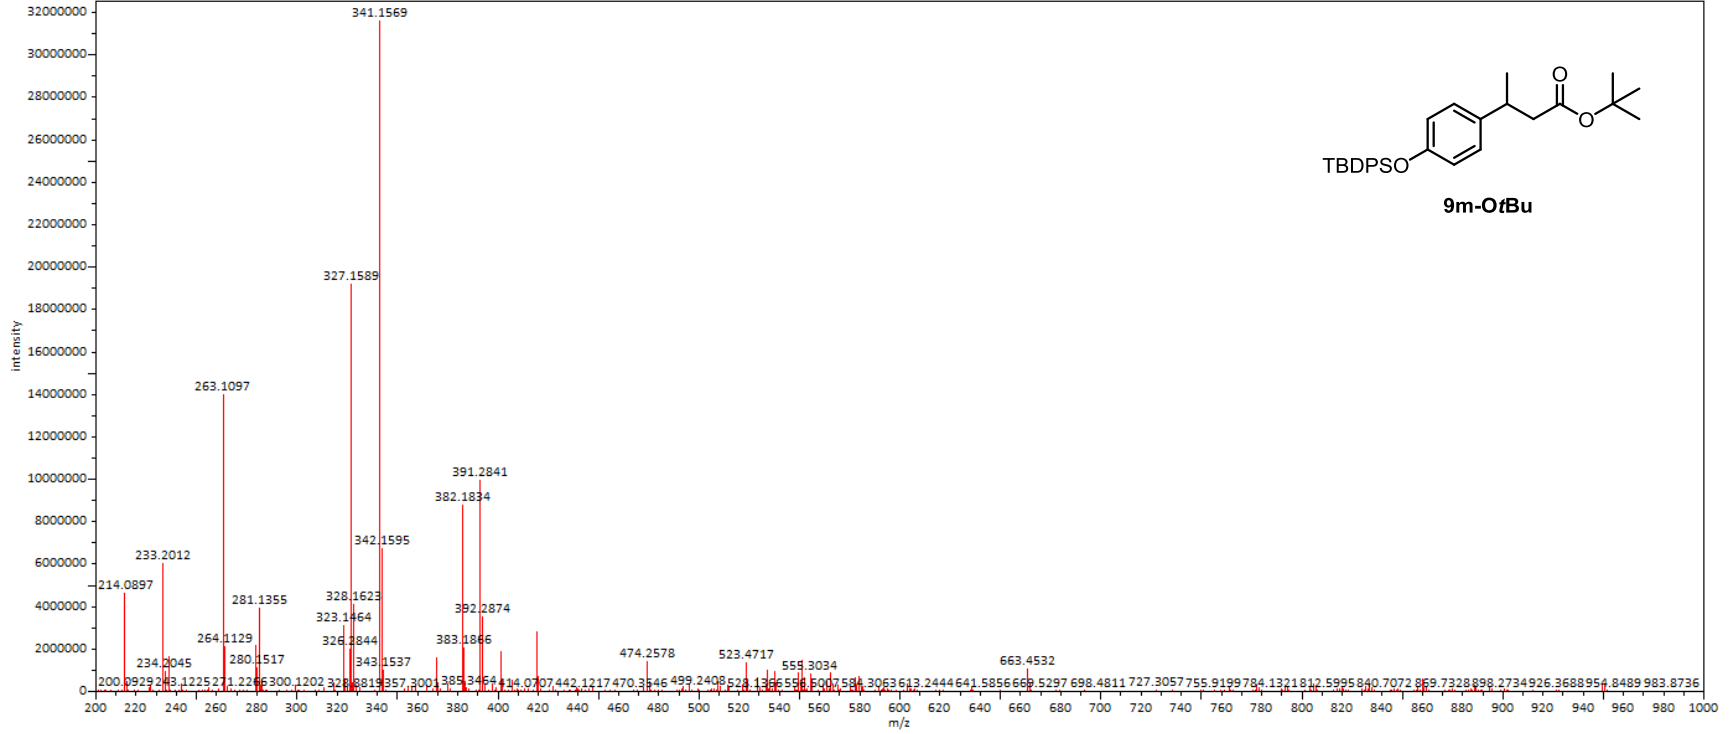

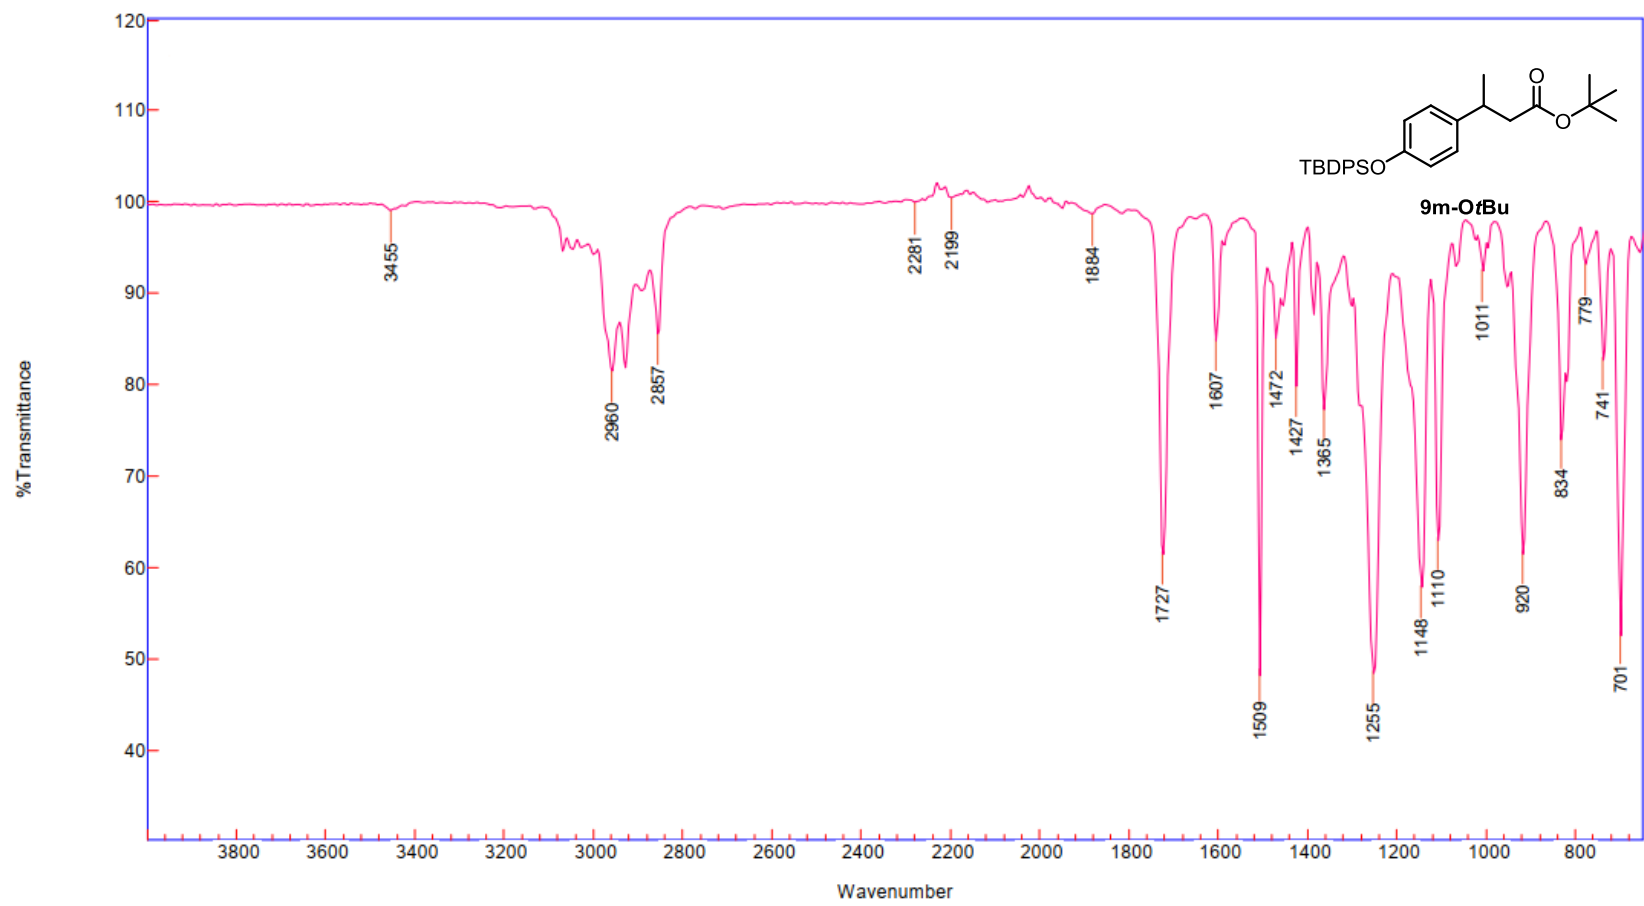

# Ethyl 3-(4-(dimethylamino)phenyl)butanoate (9n)

<sup>1</sup>H NMR

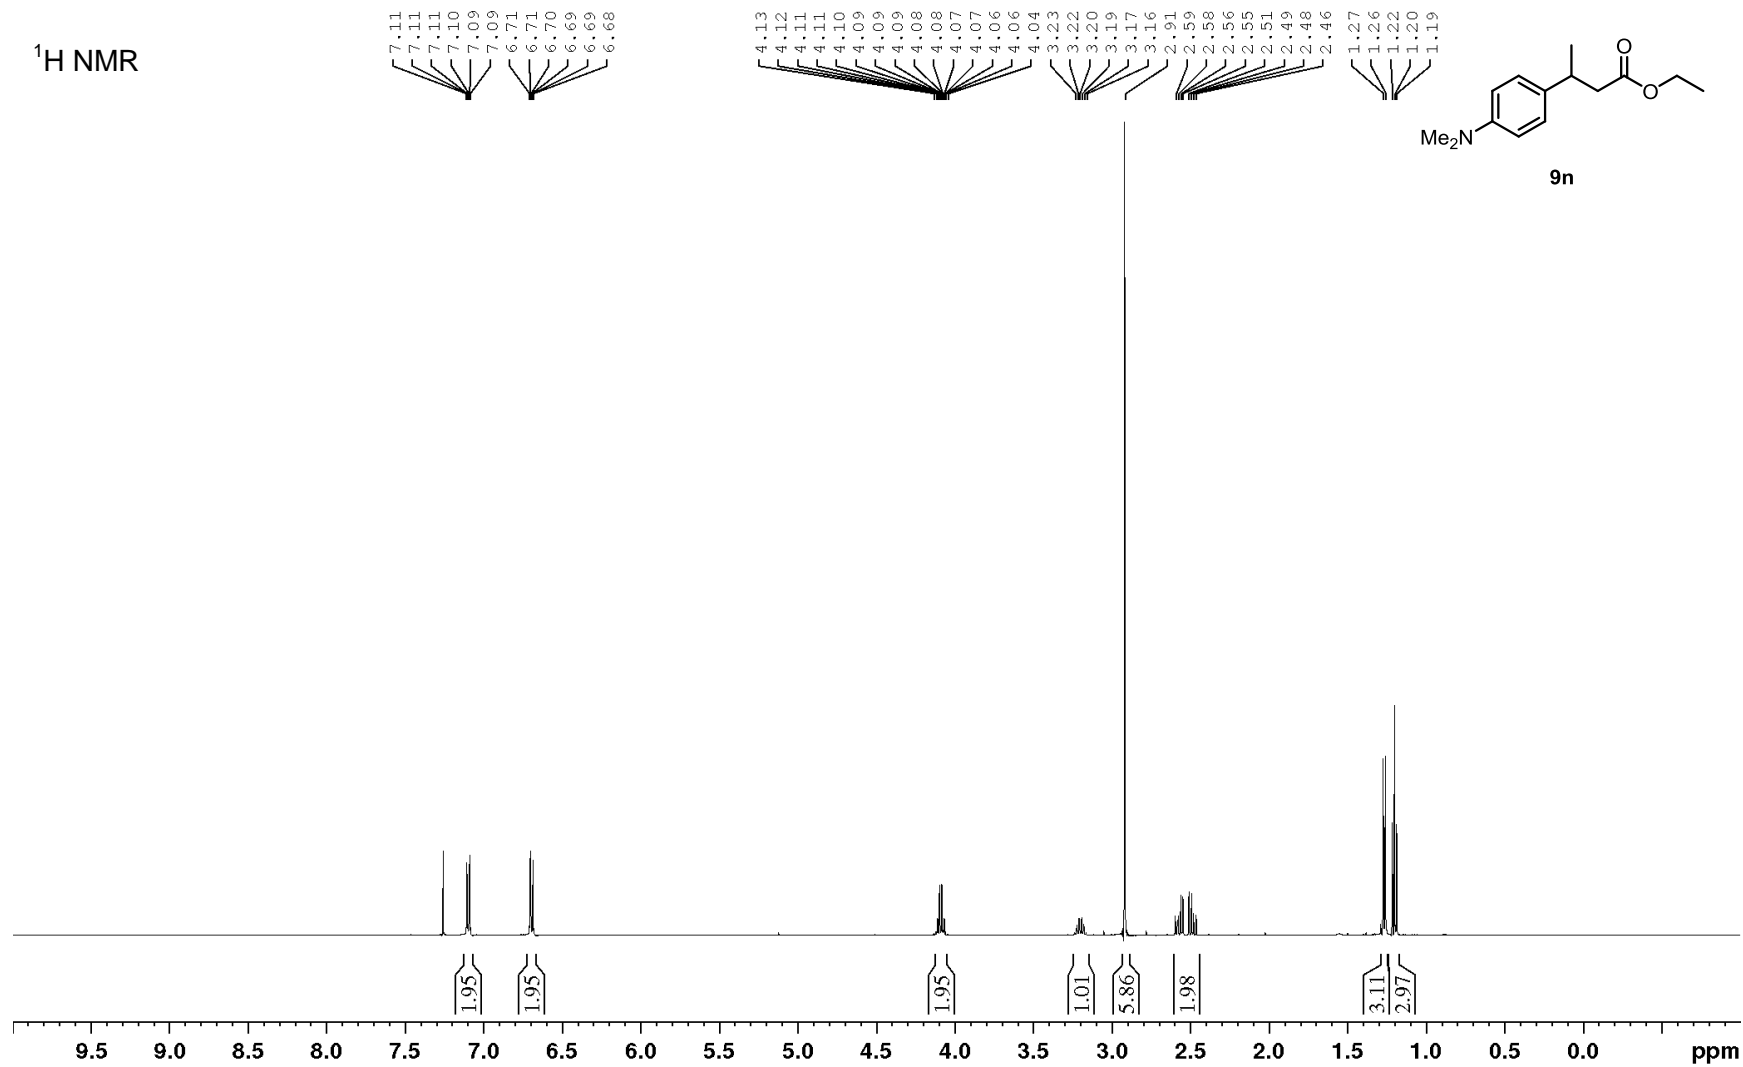

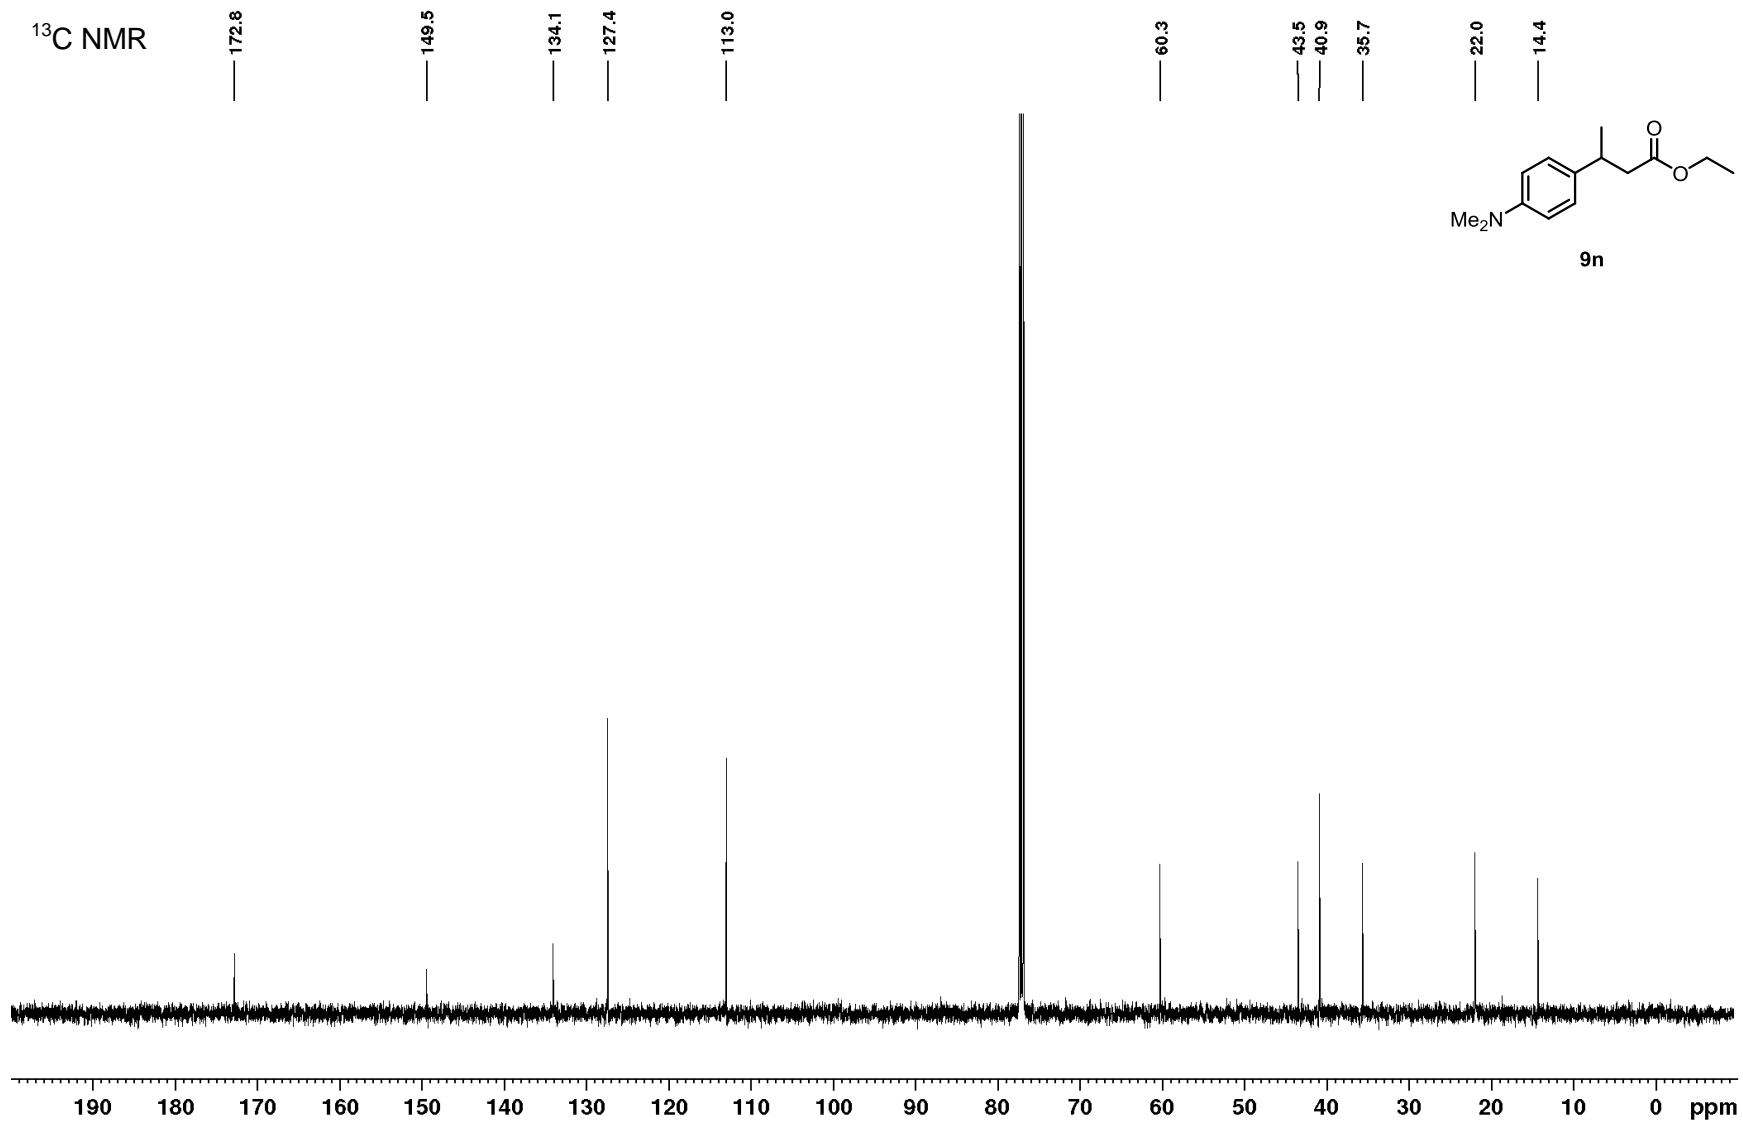

$^1\text{H}$ - $^1\text{H}$  COSY

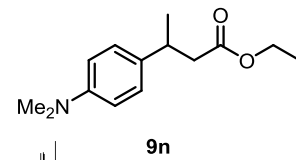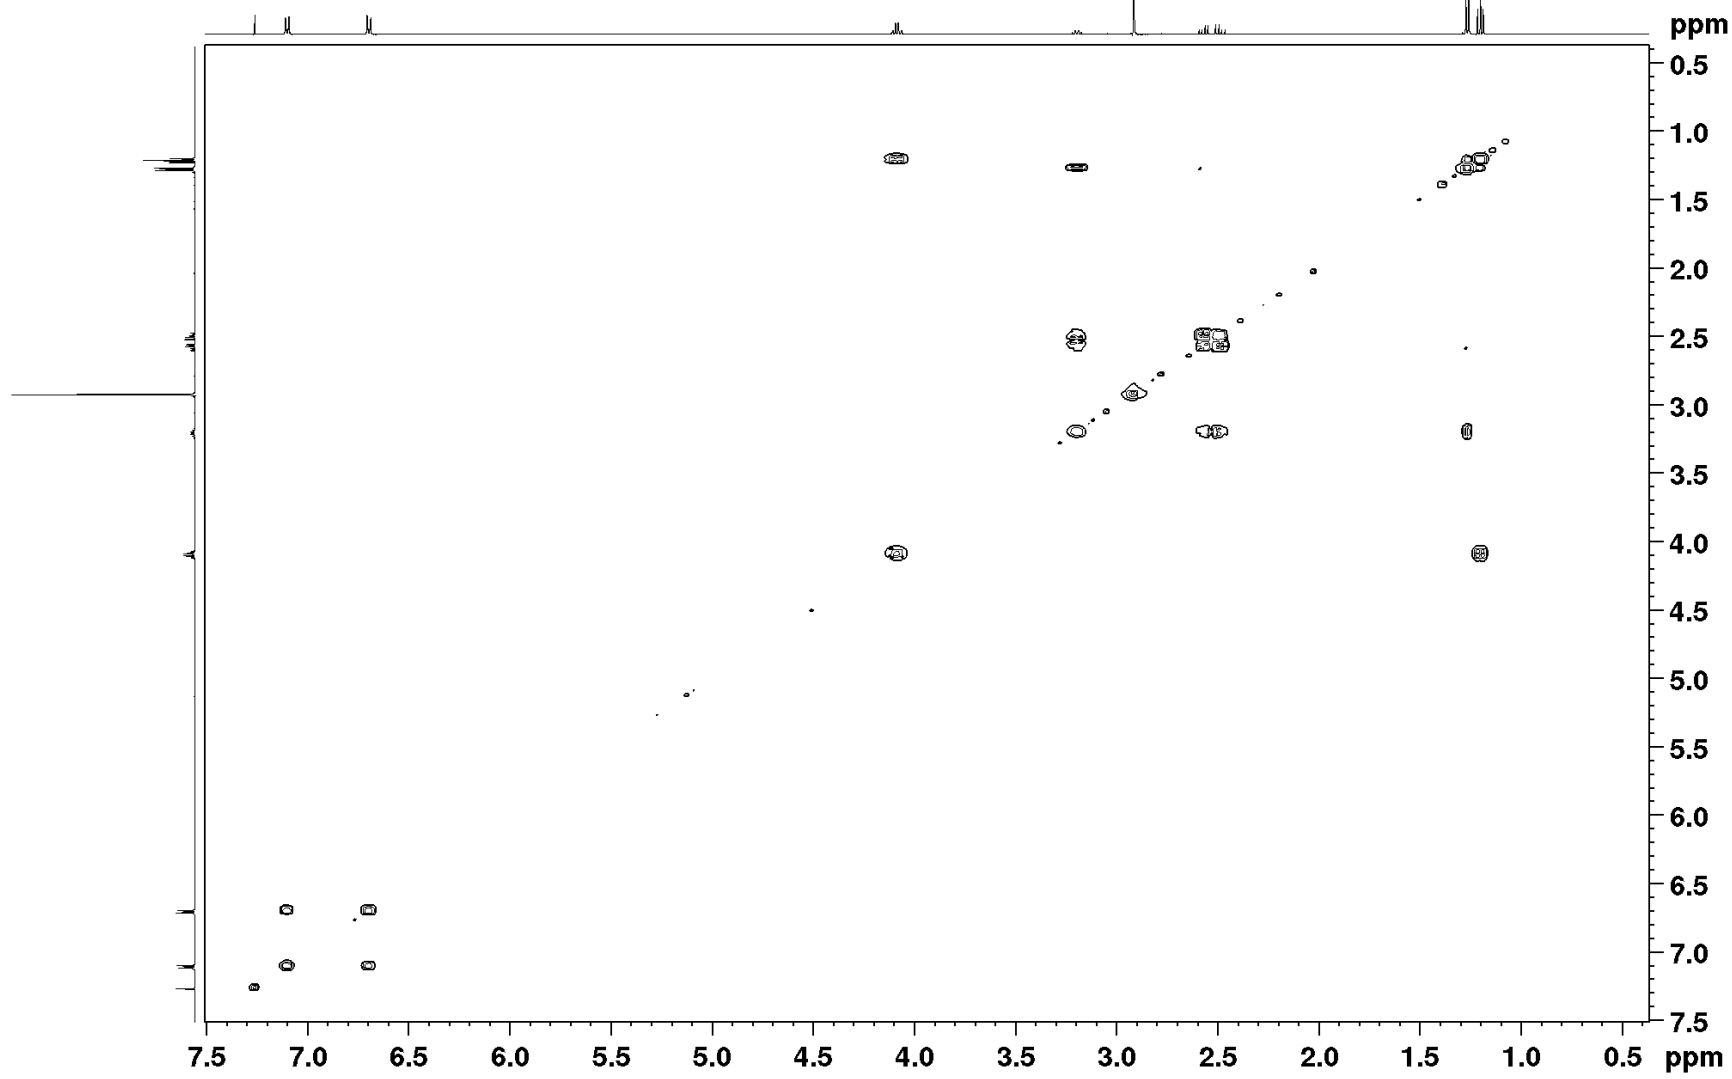



$^1\text{H}$ - $^{13}\text{C}$  HSQC

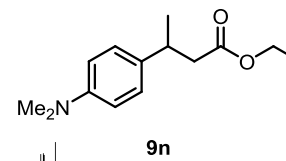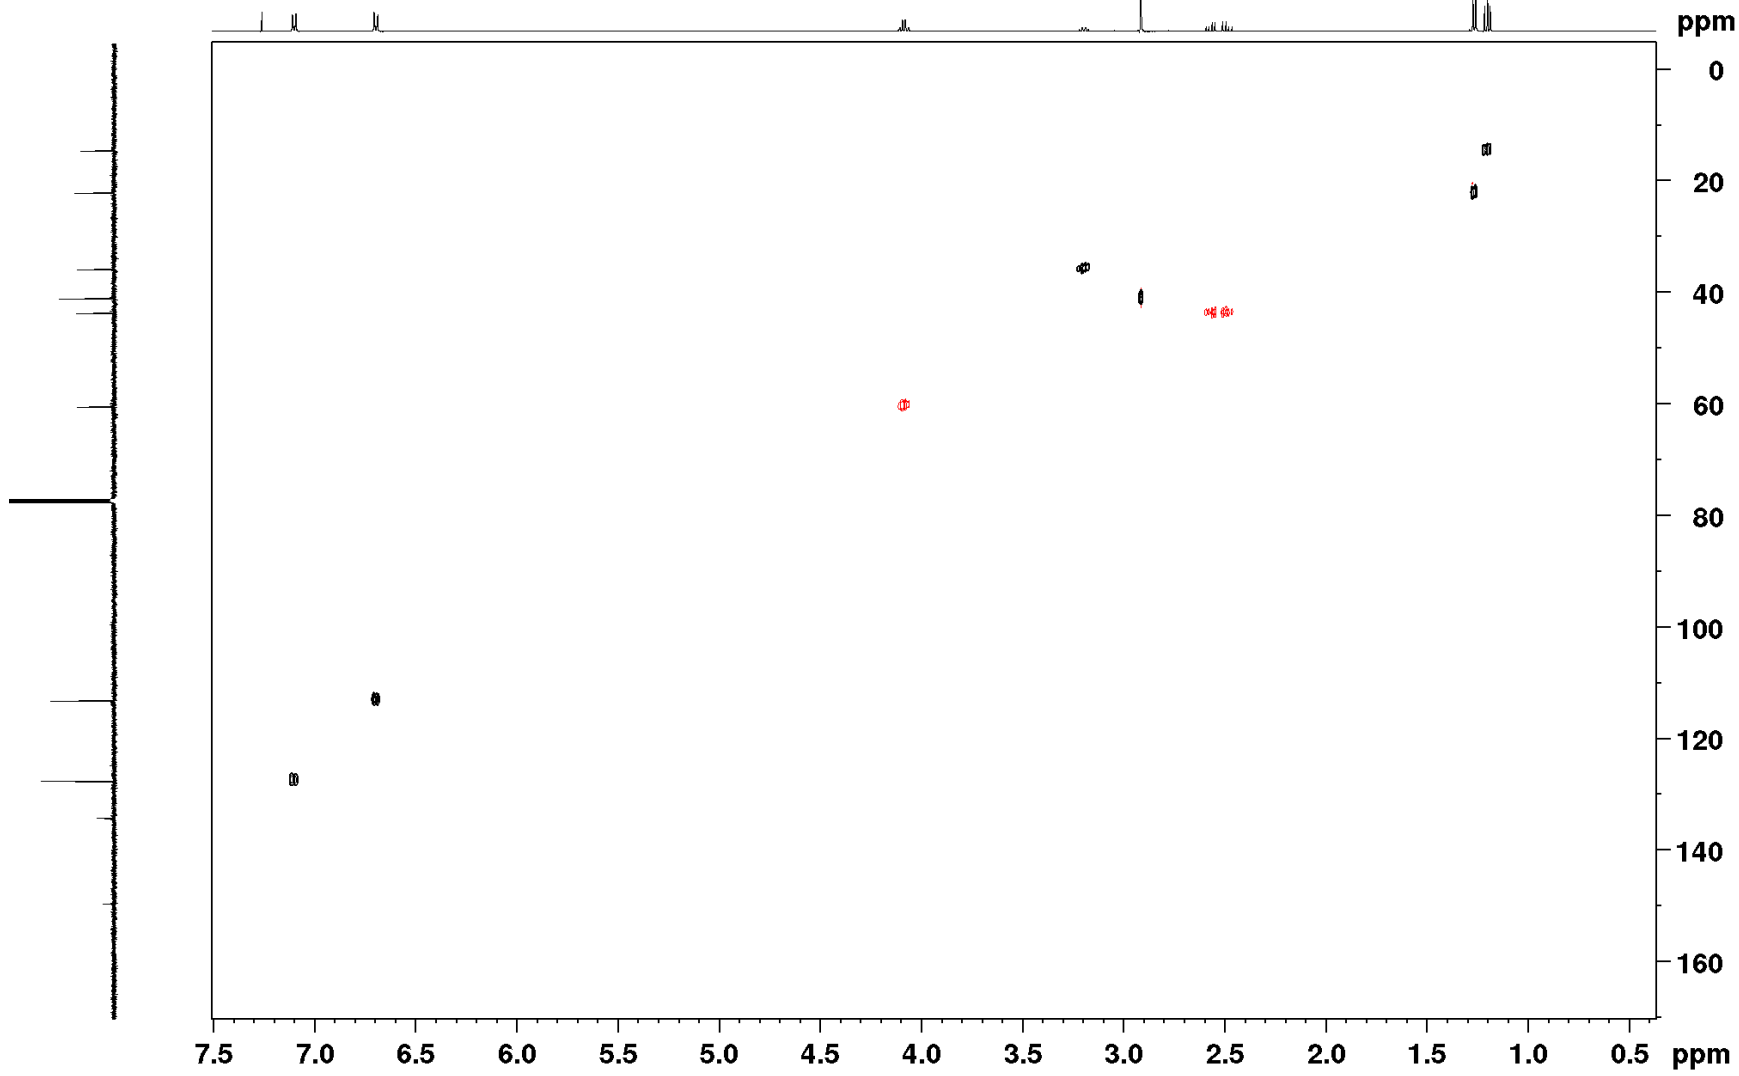

$^1\text{H}$ - $^{13}\text{C}$  HMBC

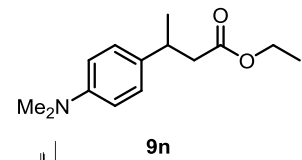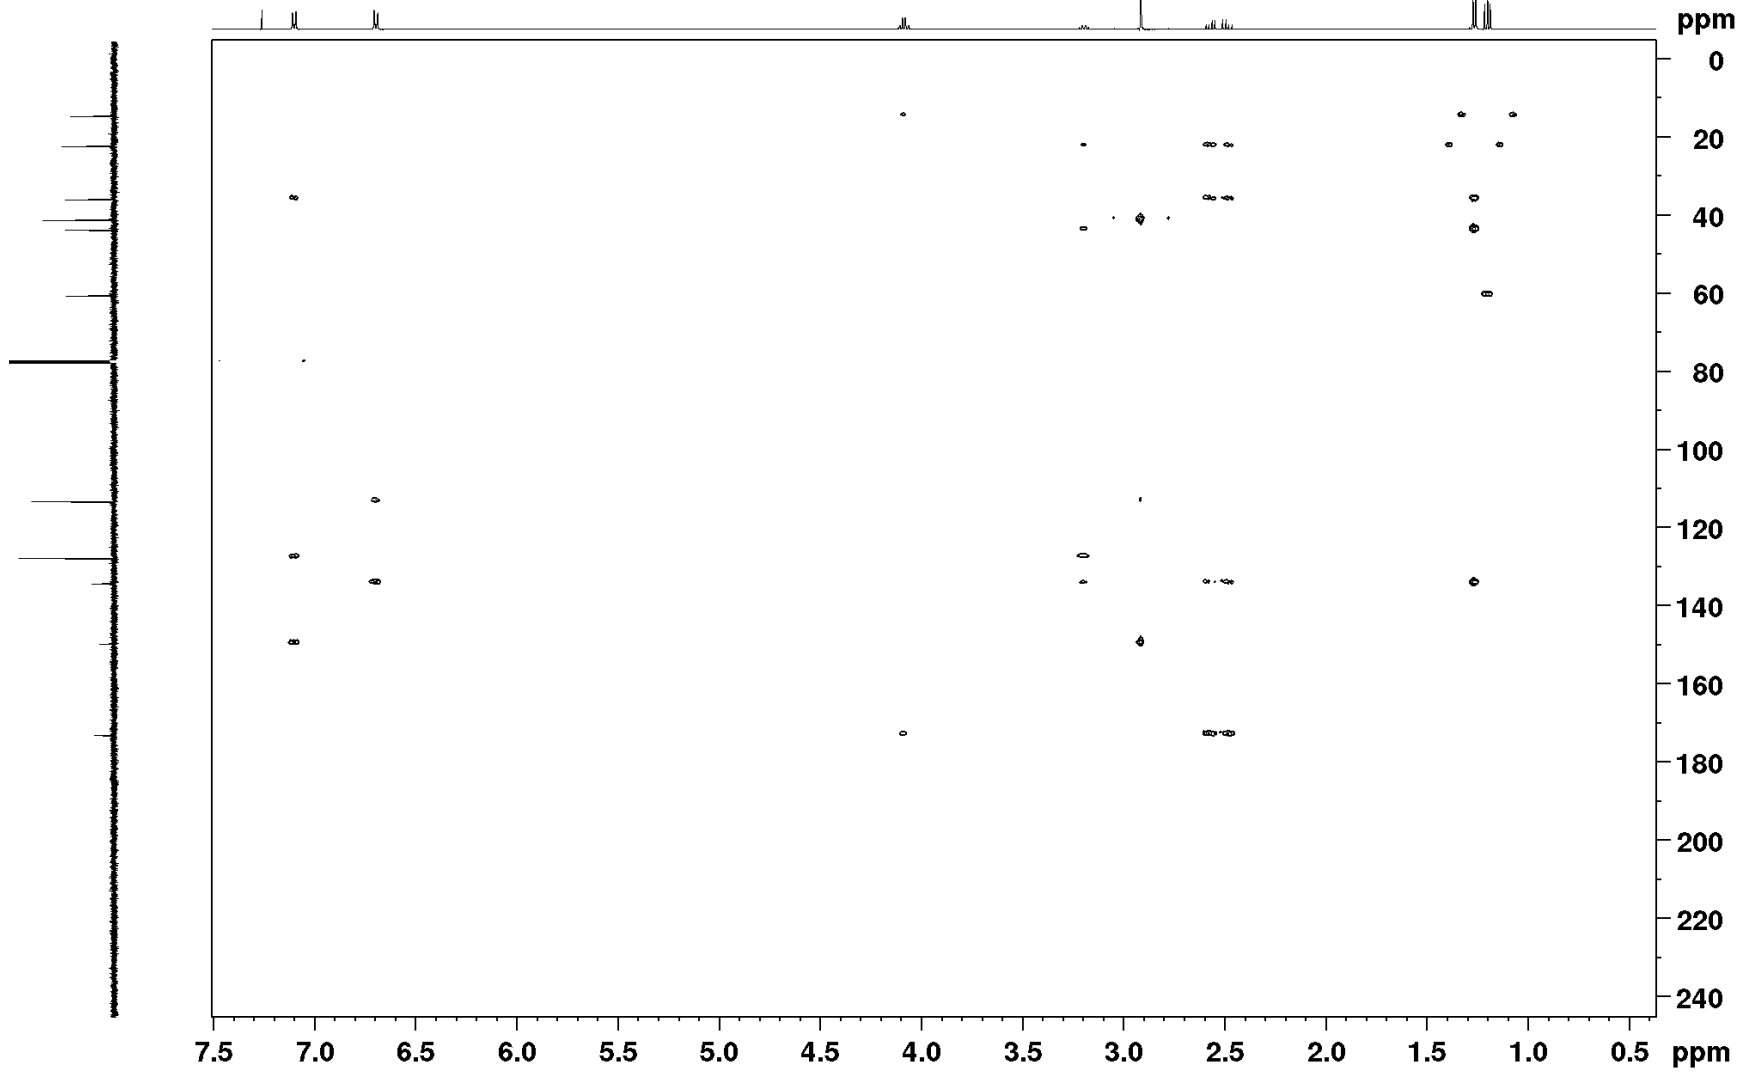

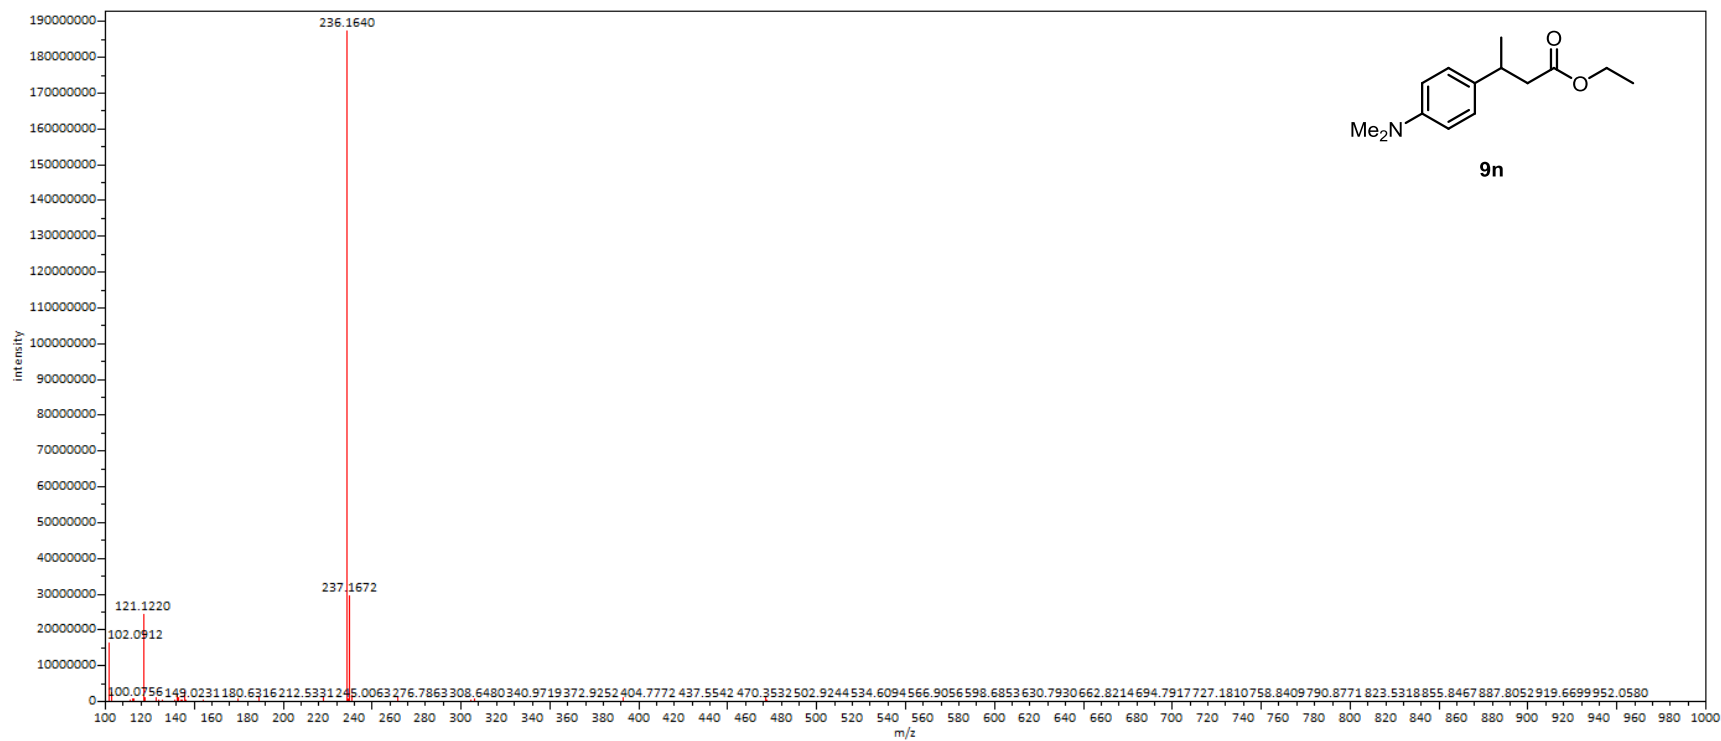

**Ethyl 3-(thiophen-2-yl)butanoate (9o)**

<sup>1</sup>H NMR

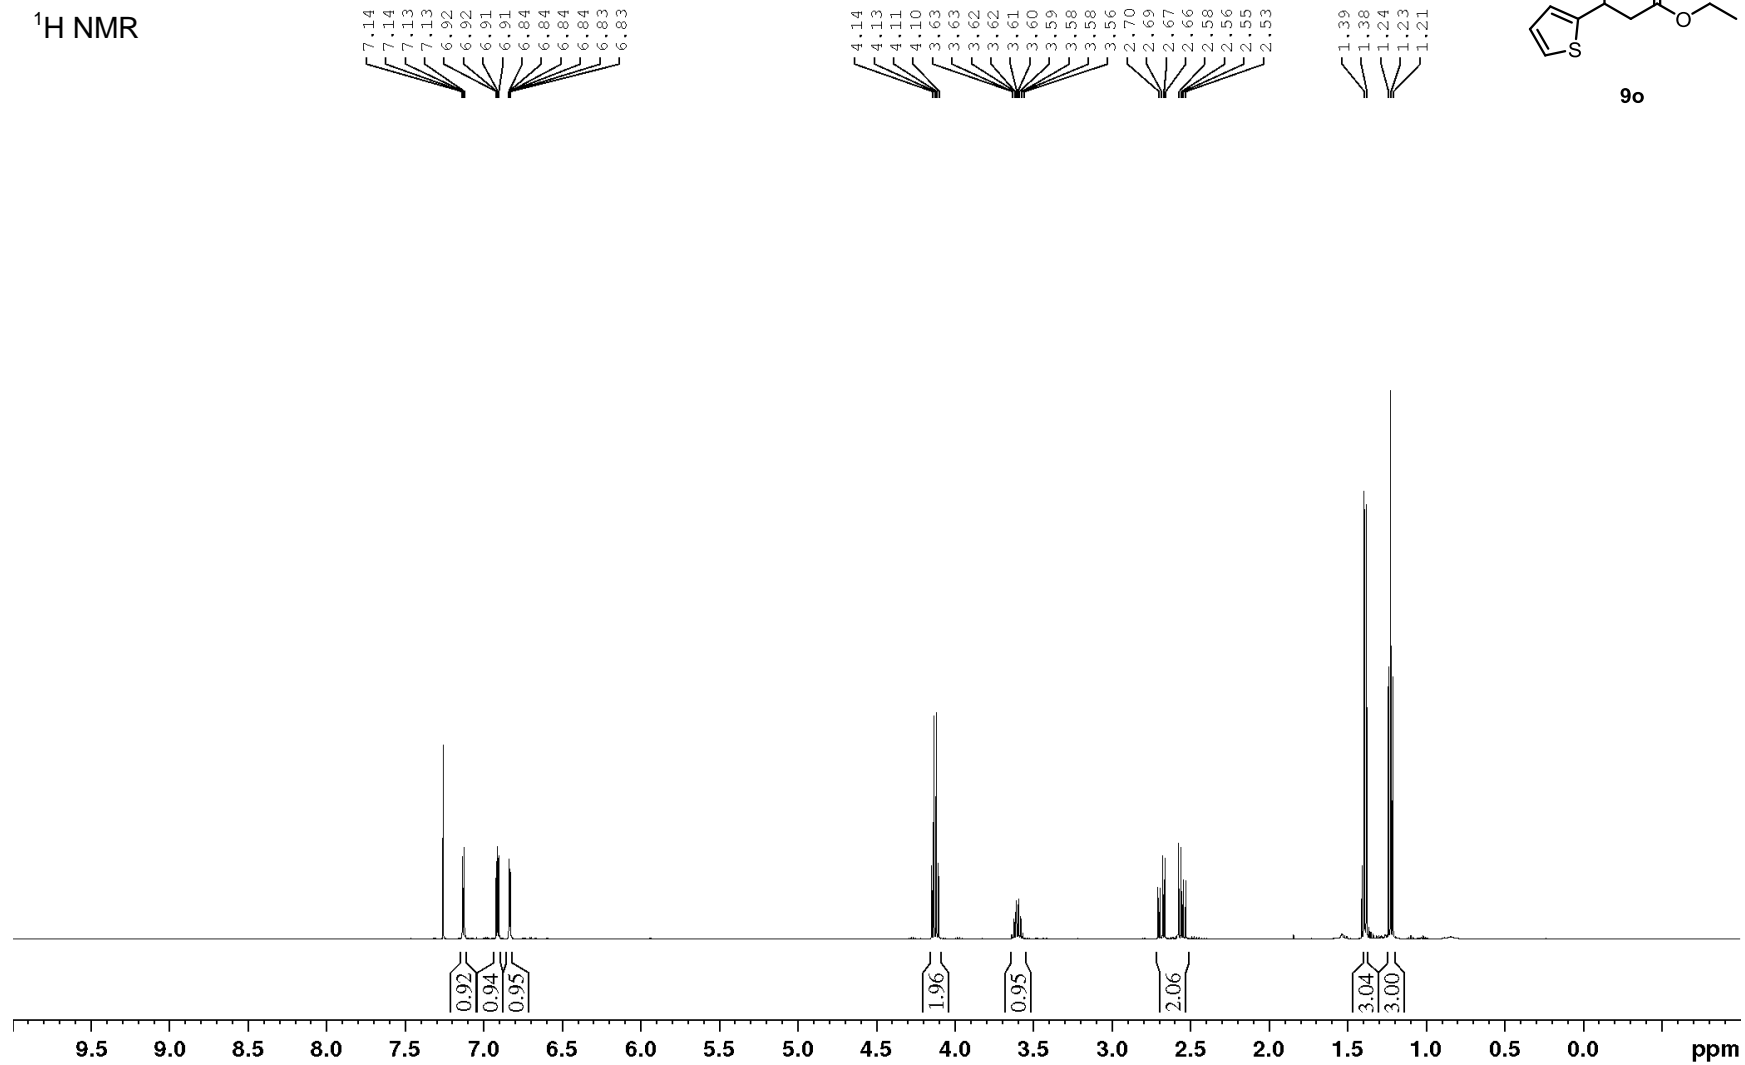

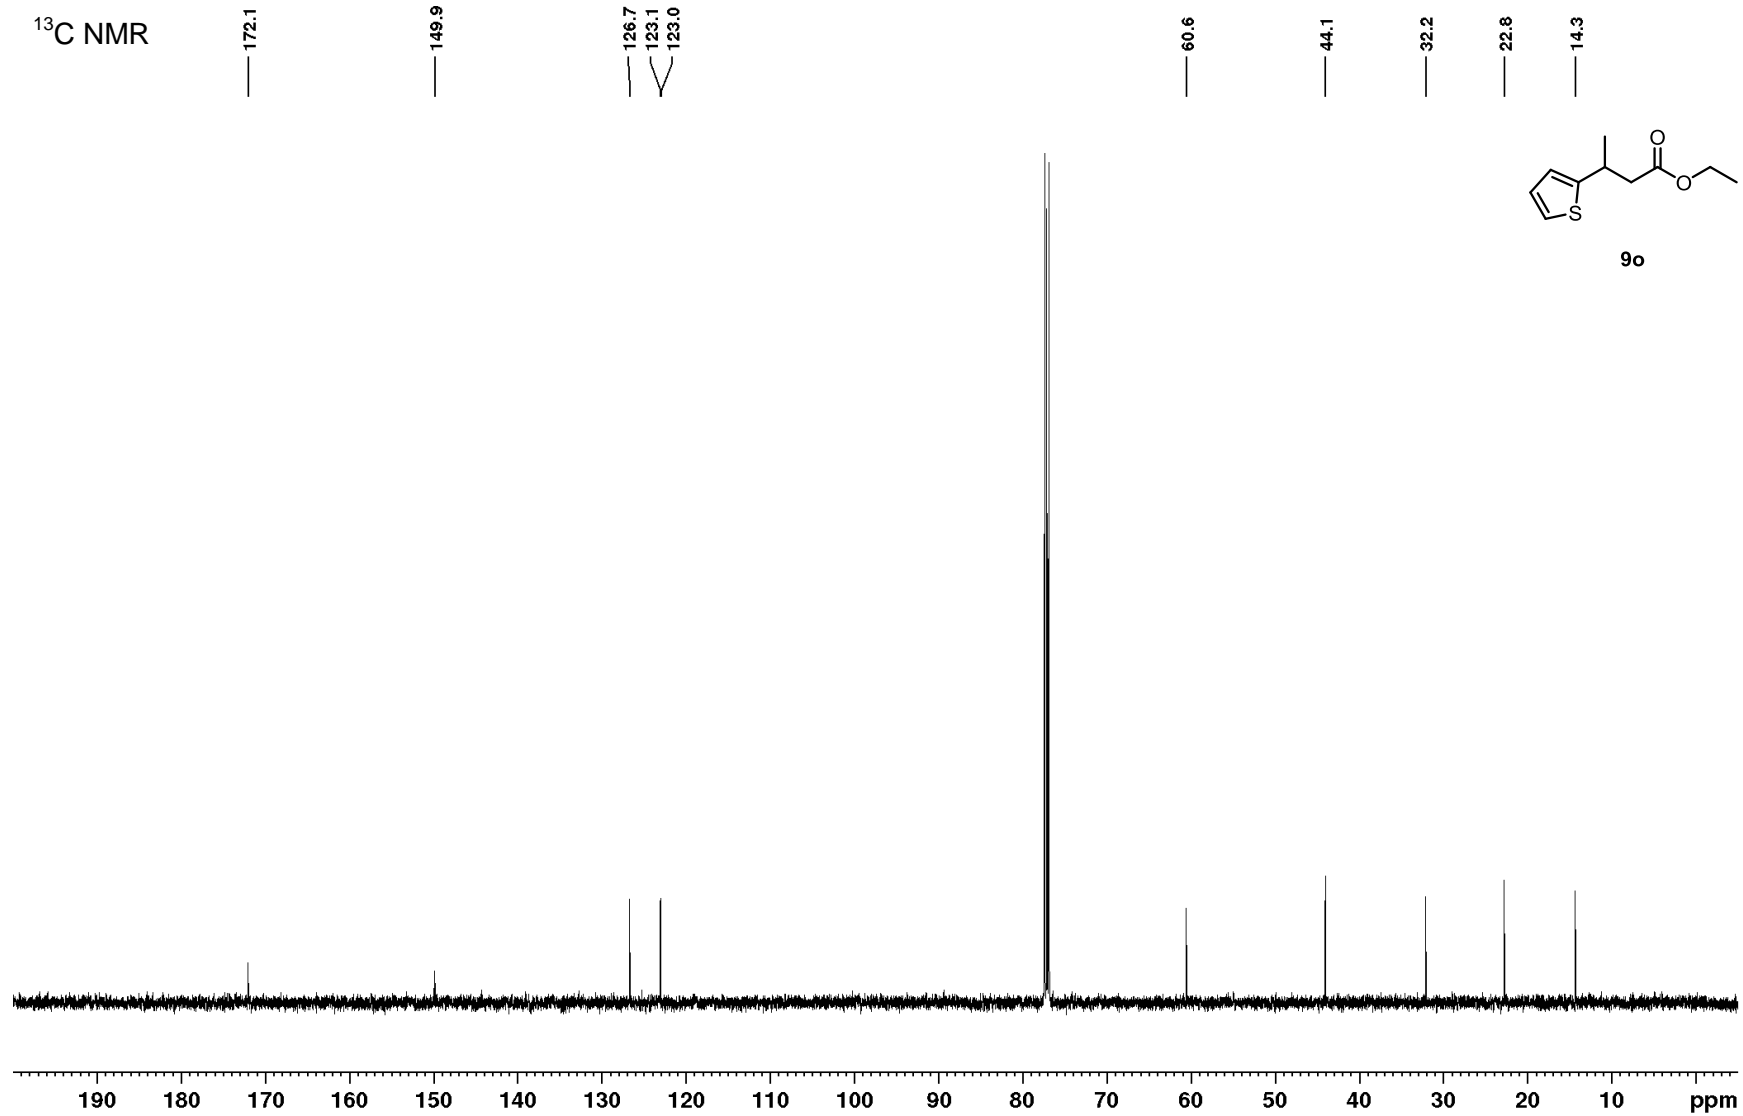

<sup>13</sup>C DEPT NMR

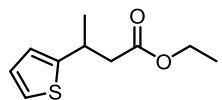

9o

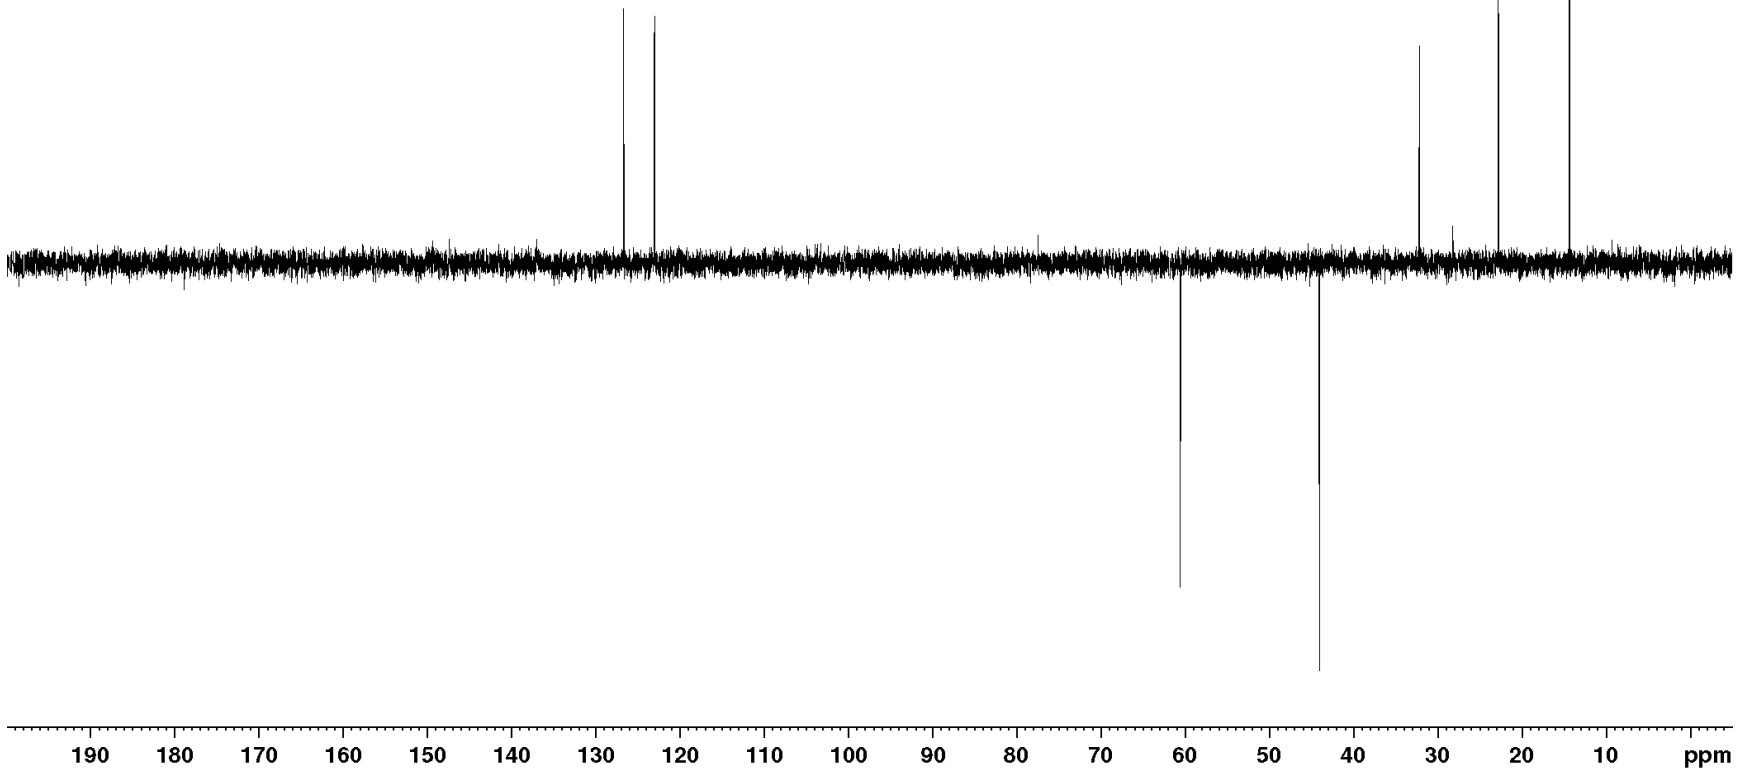

$^1\text{H}$ - $^1\text{H}$  COSY

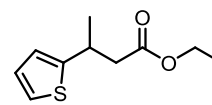

90

ppm

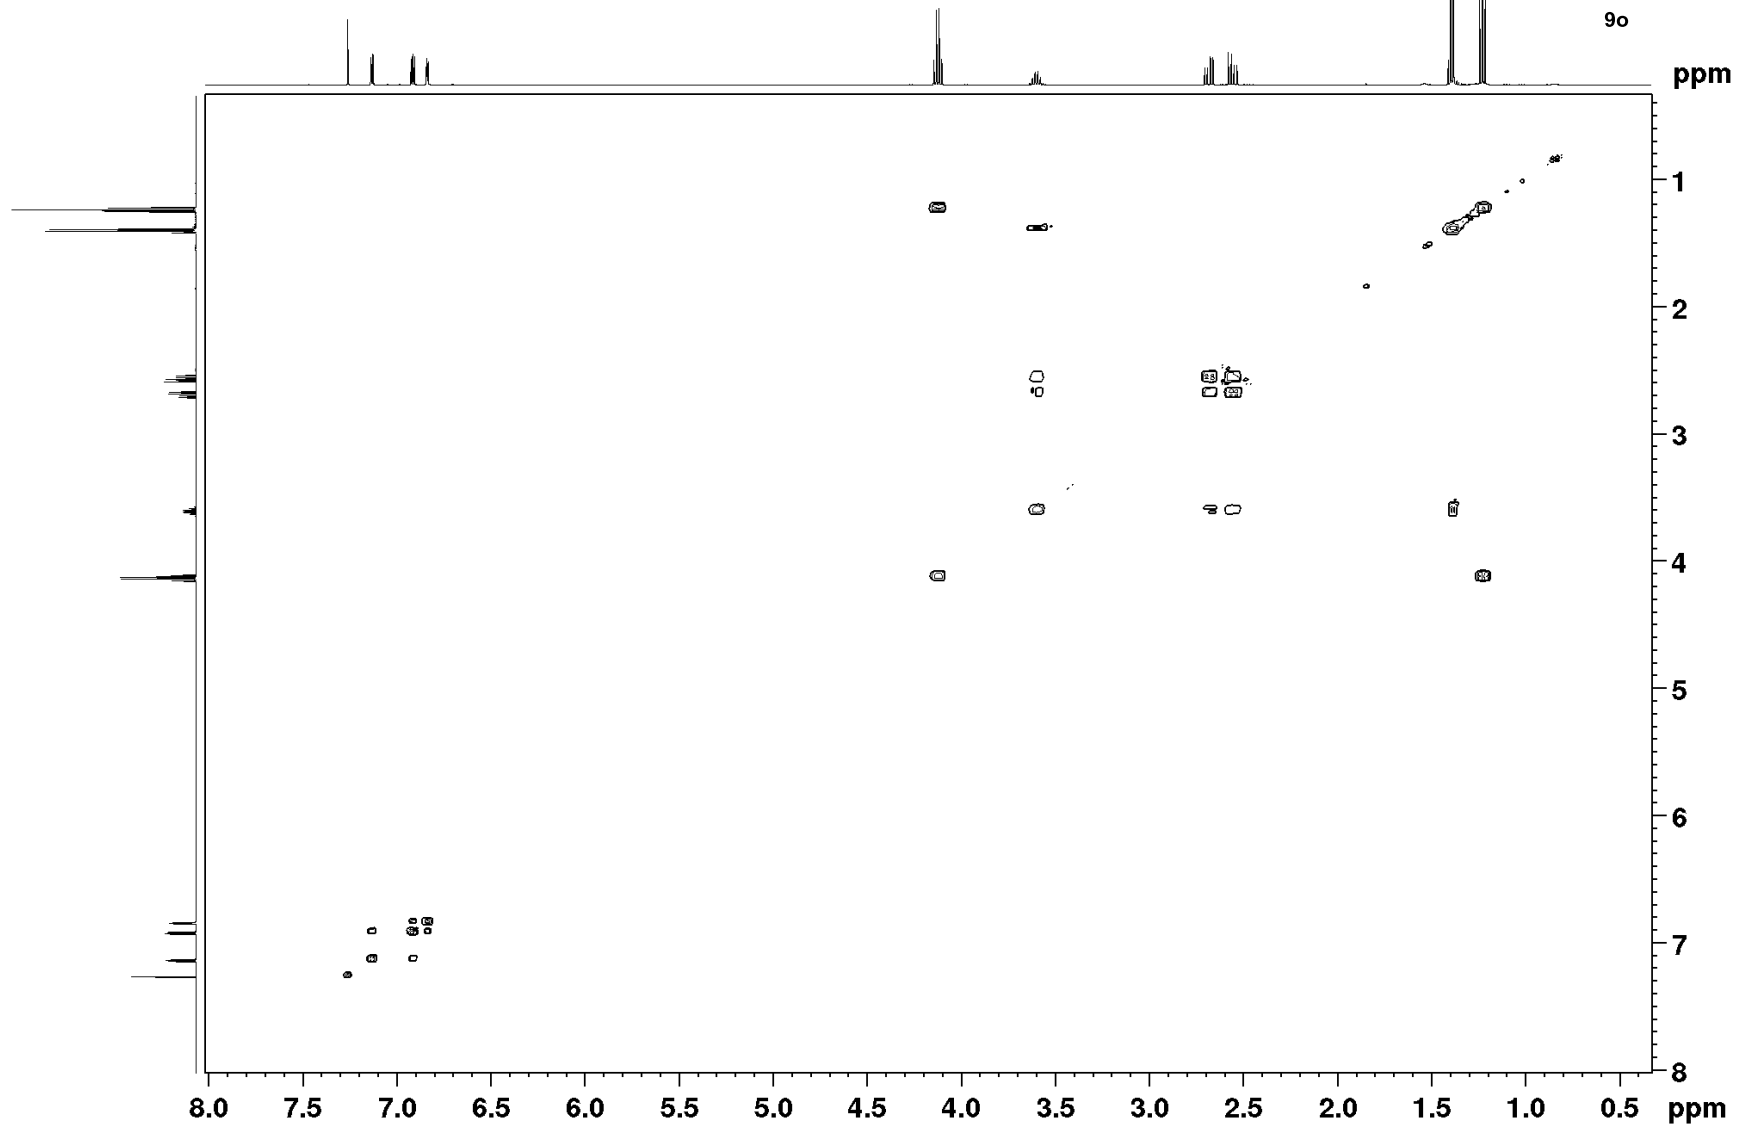

$^1\text{H}$ - $^{13}\text{C}$  HMQC

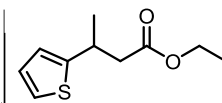

9o

ppm

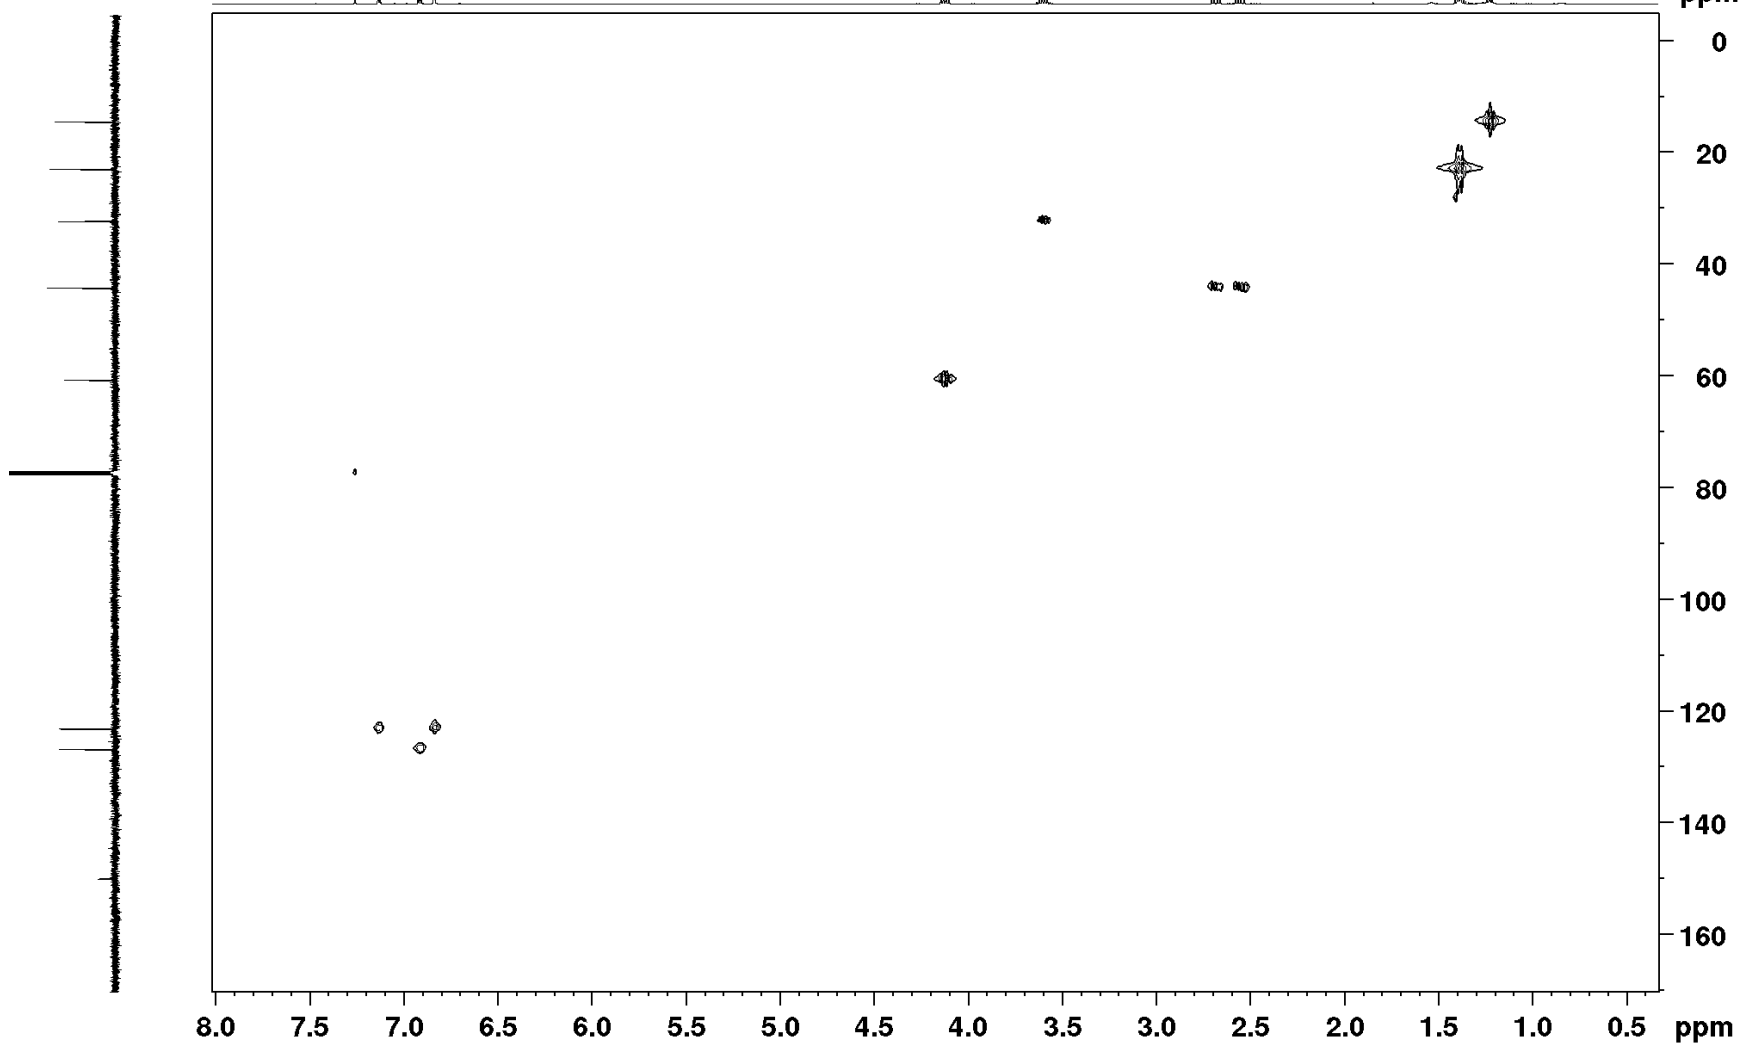



$^1\text{H}$ - $^{13}\text{C}$  HMBC

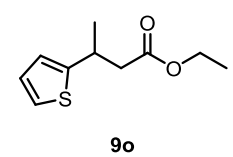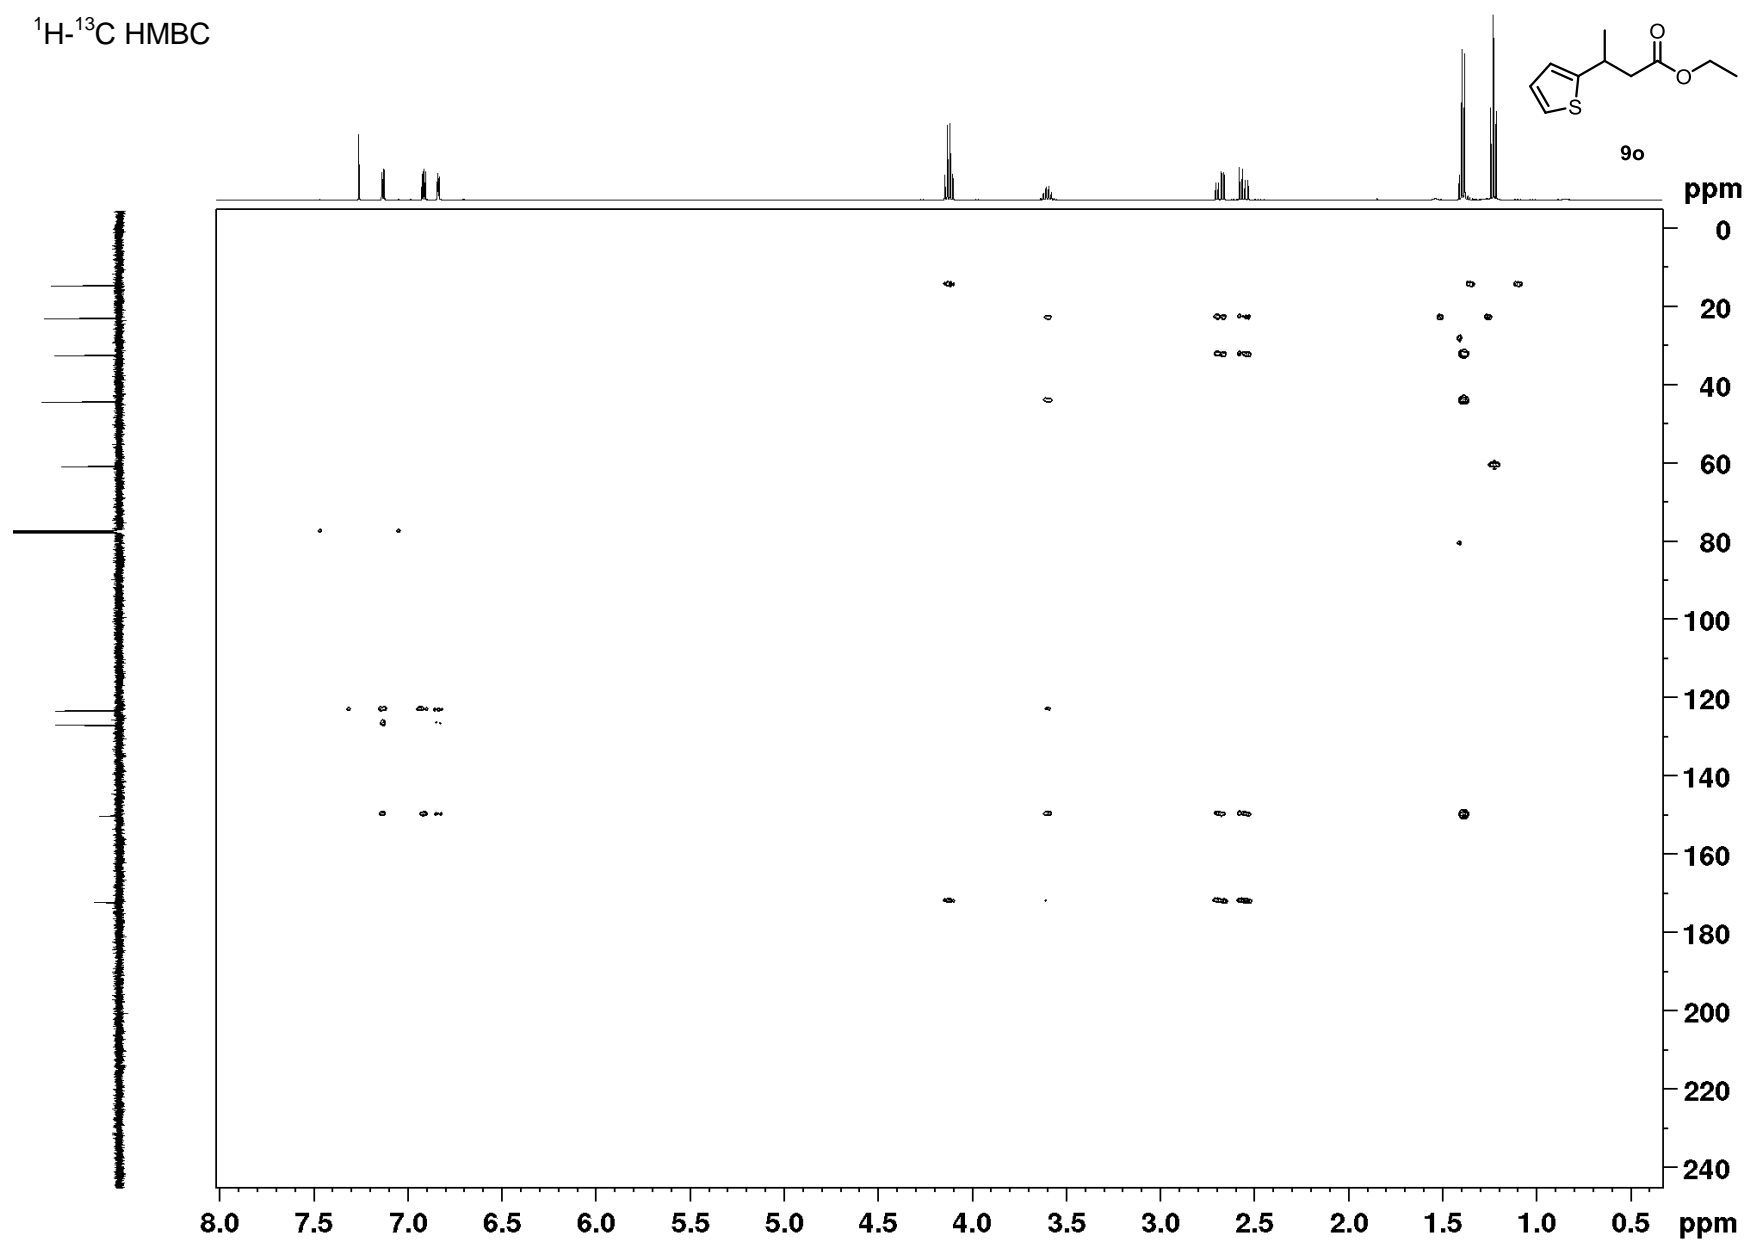

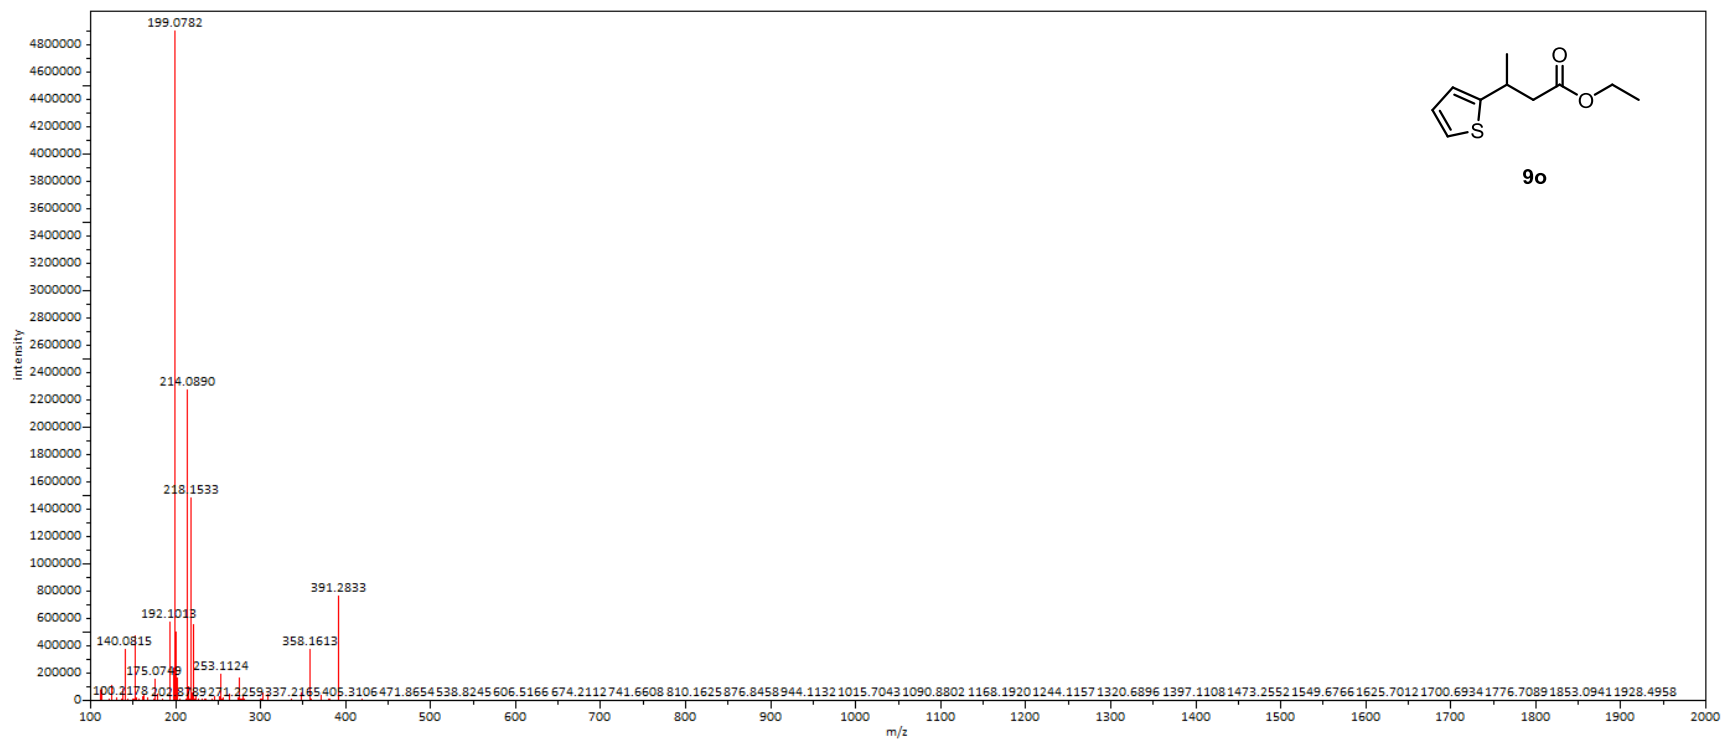

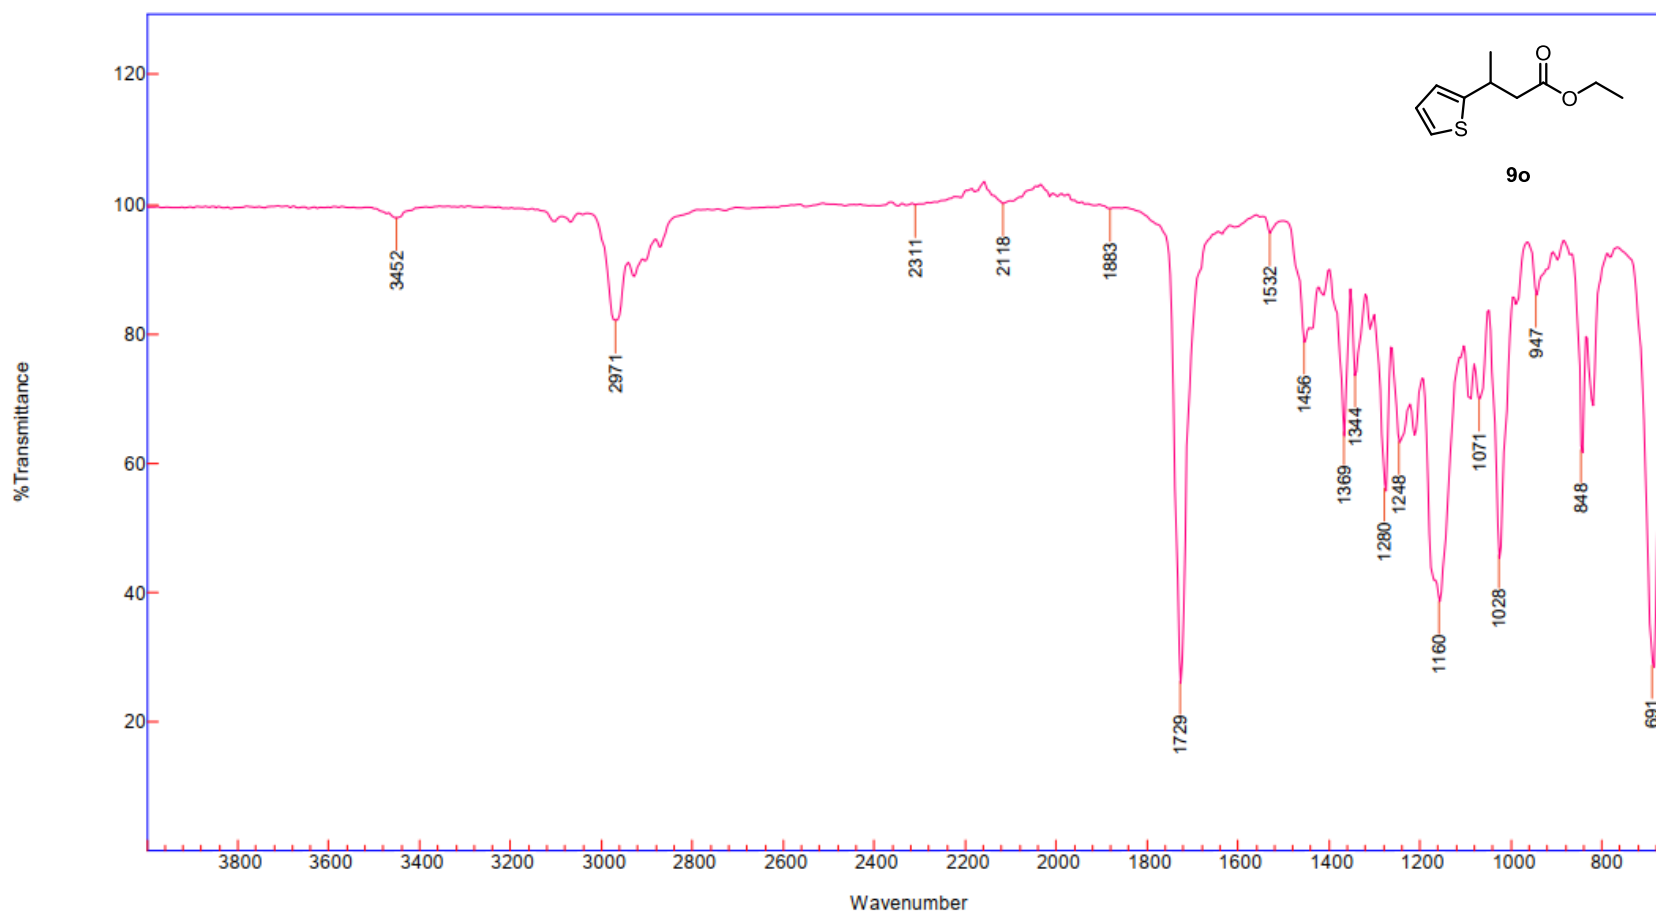

# Ethyl 3-cyclopropyl-3-phenylpropanoate (9p)

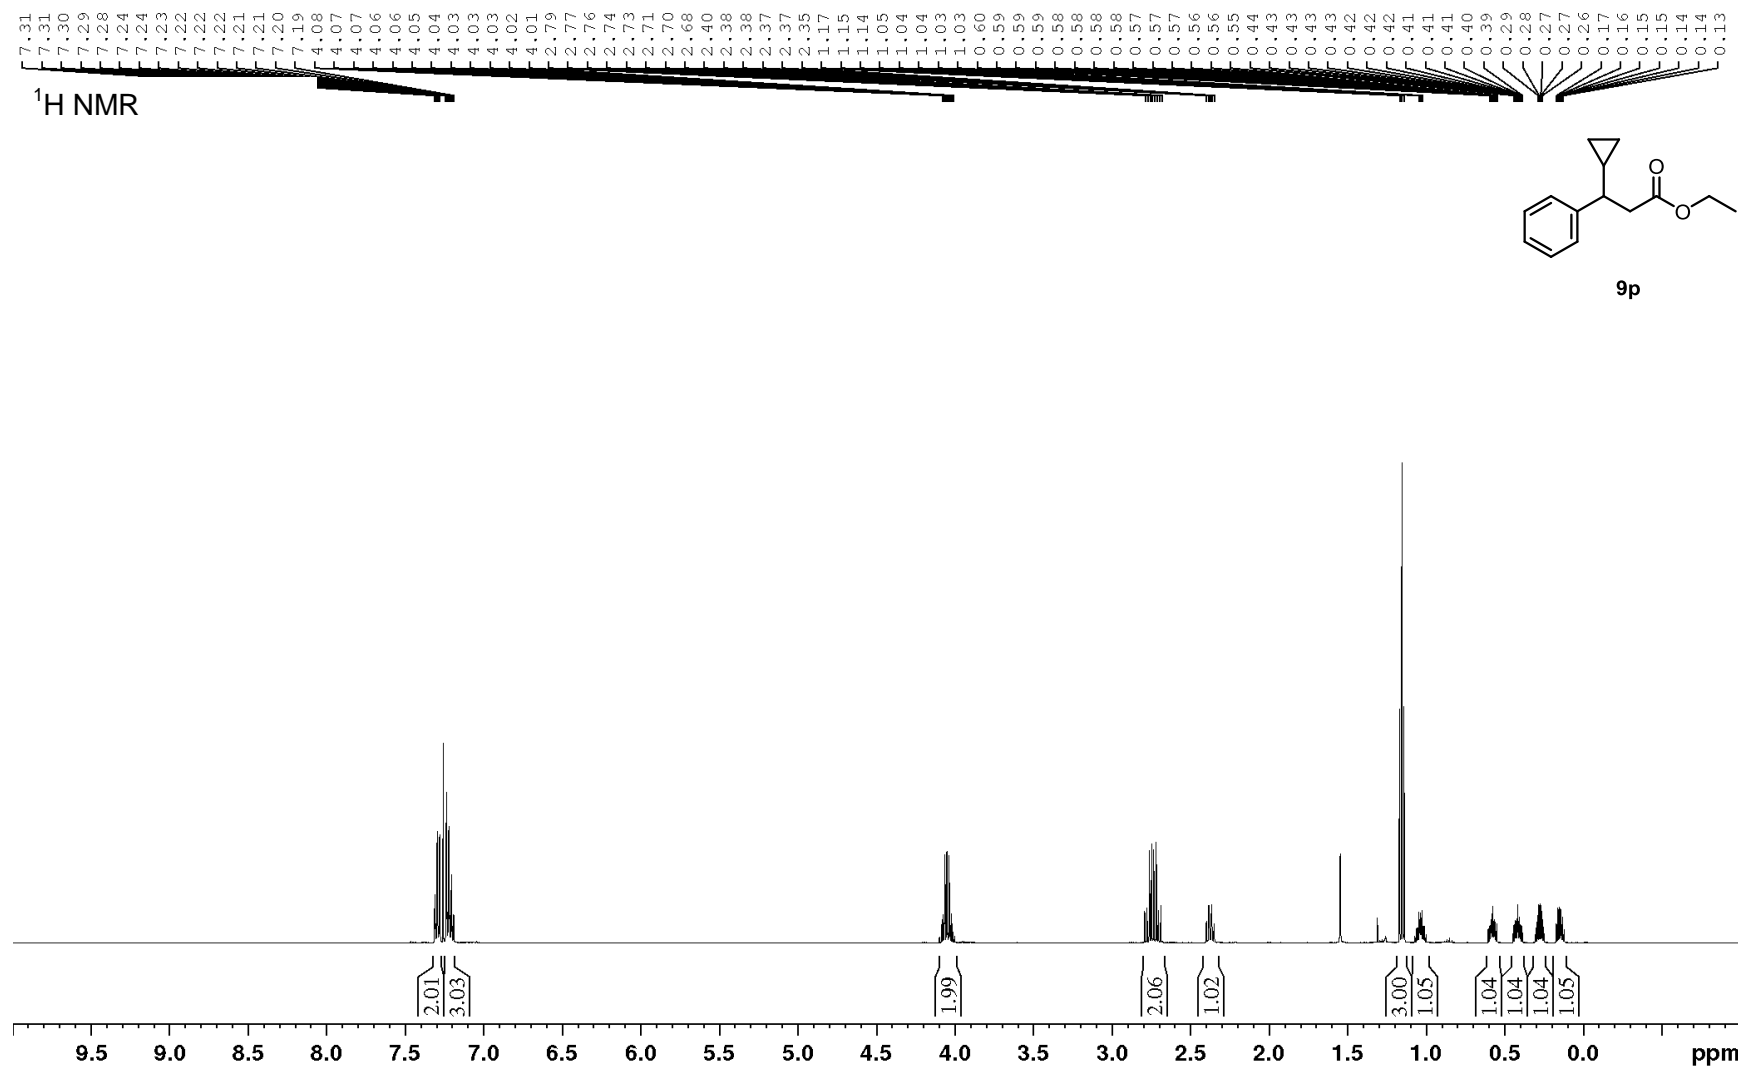

$^{13}\text{C}$  NMR

144.3

128.5  
127.5  
126.6

60.4

47.4

42.0

17.3  
14.2

5.4  
4.1

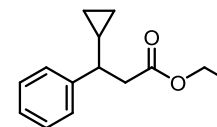

9p

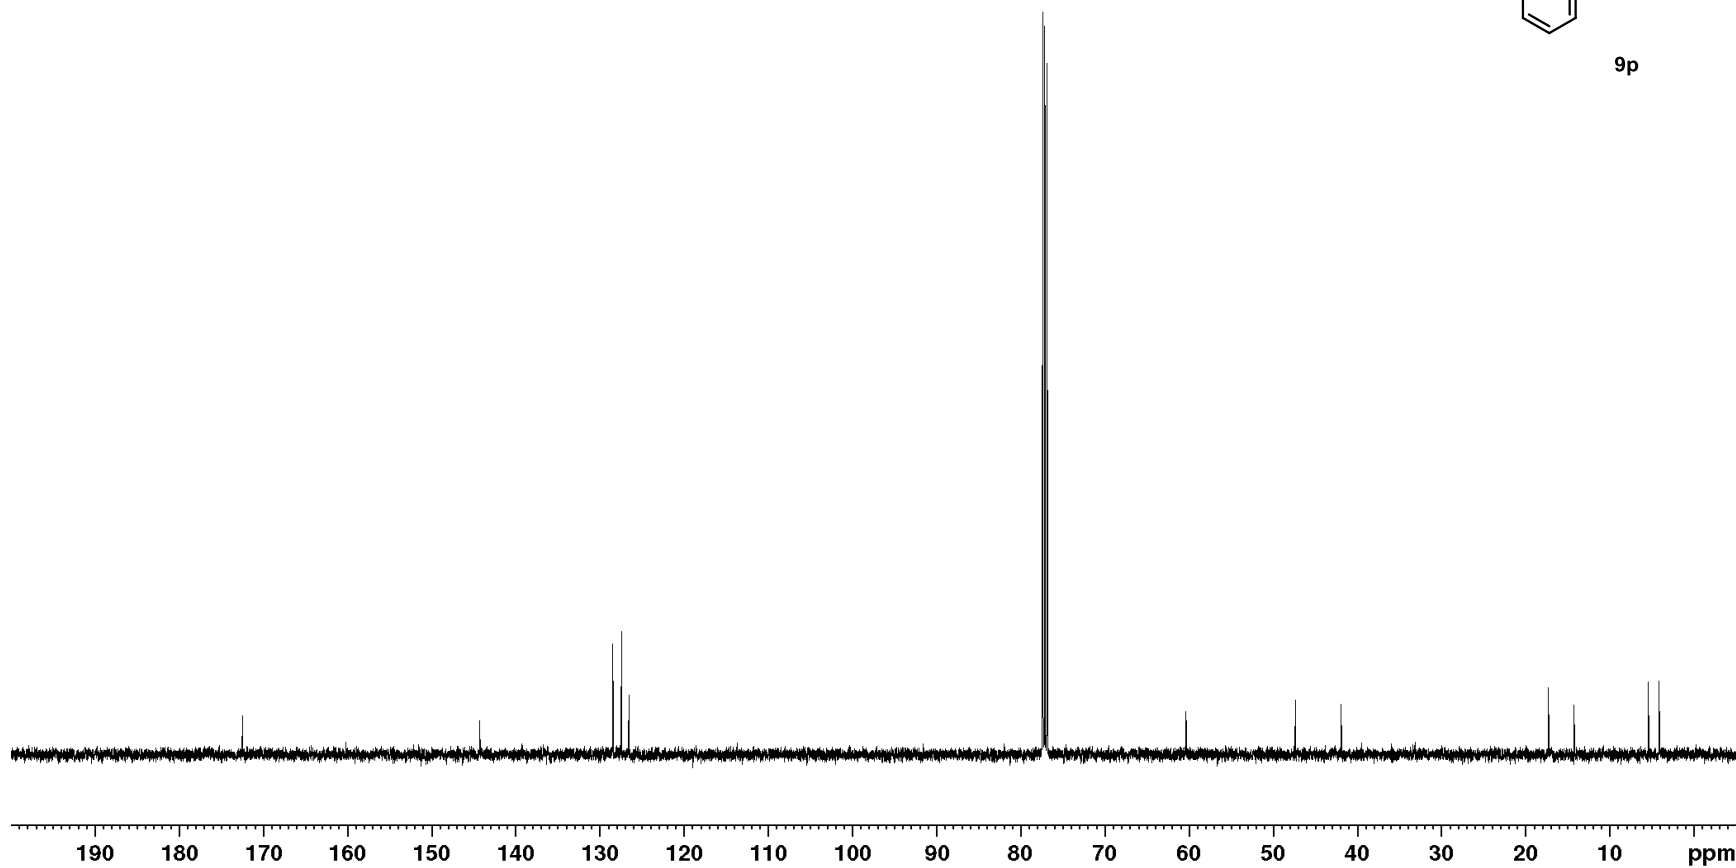

$^1\text{H}$ - $^1\text{H}$  COSY

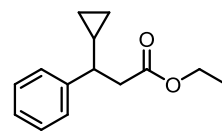

9p

ppm

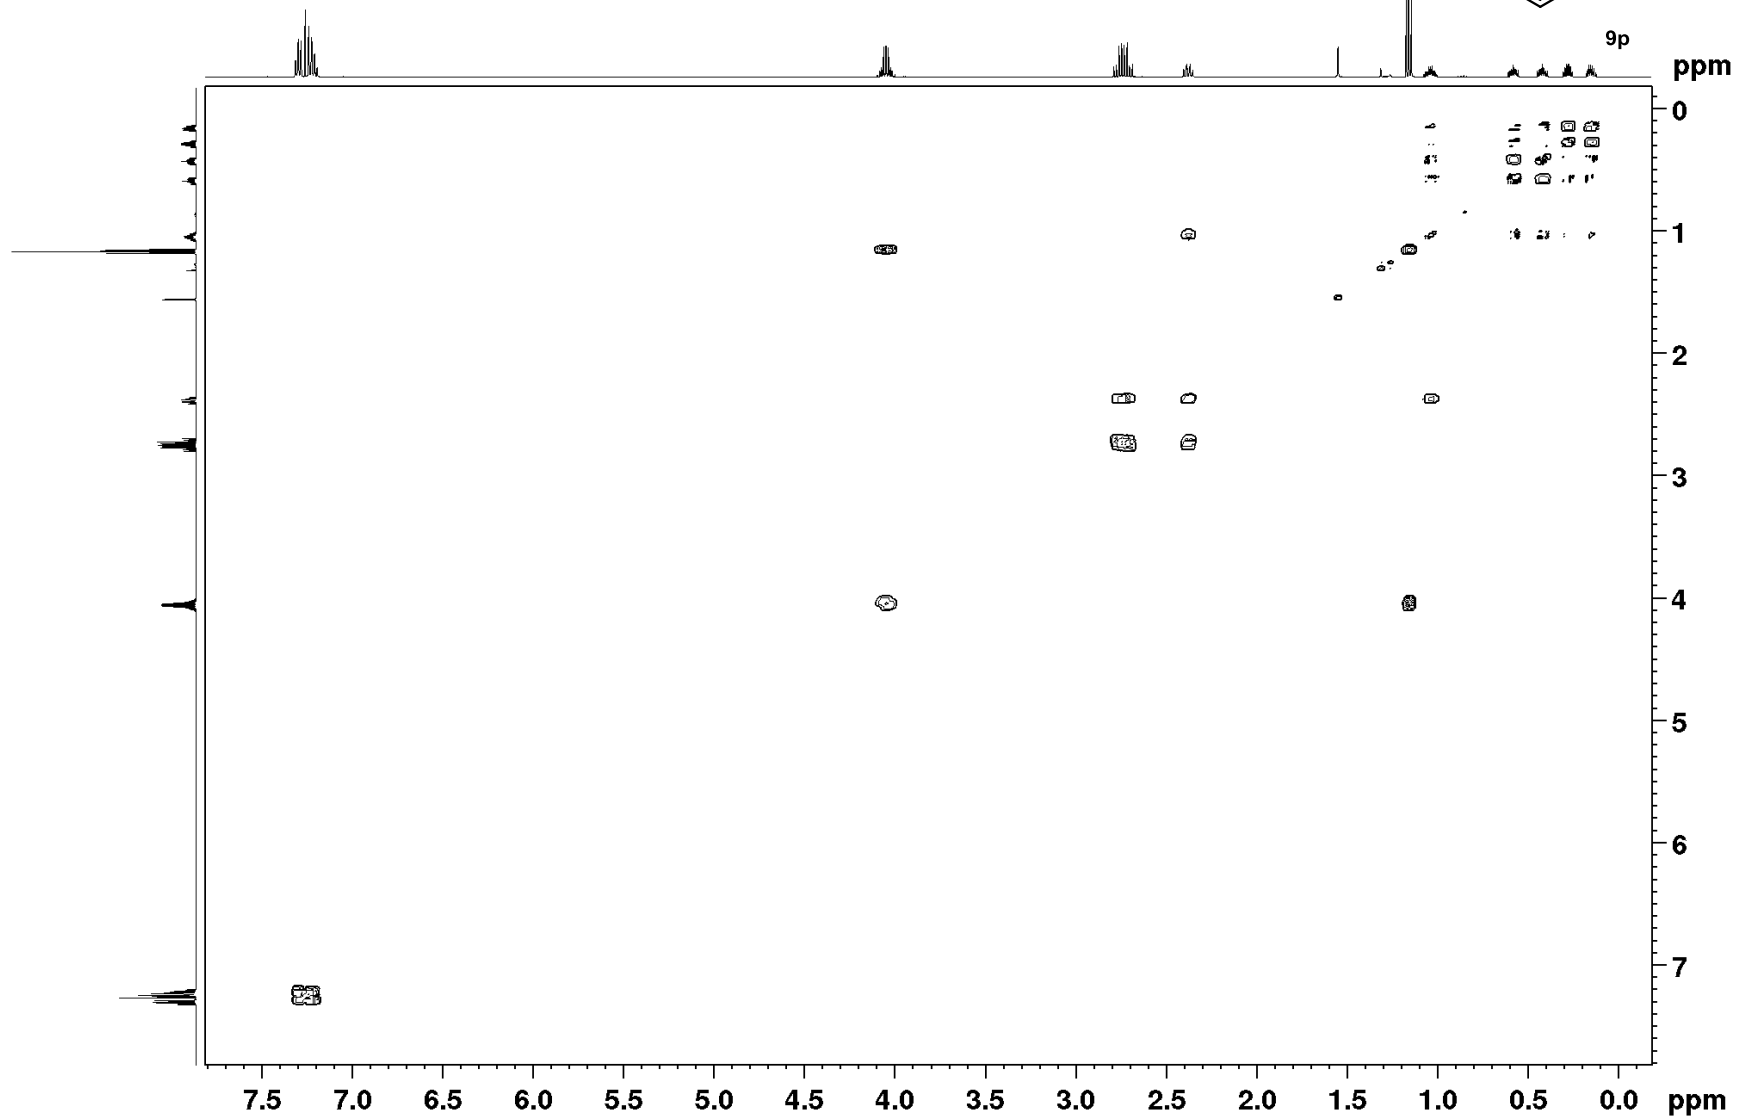

$^1\text{H}$ - $^{13}\text{C}$  HSQC

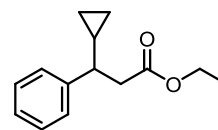

9p

ppm

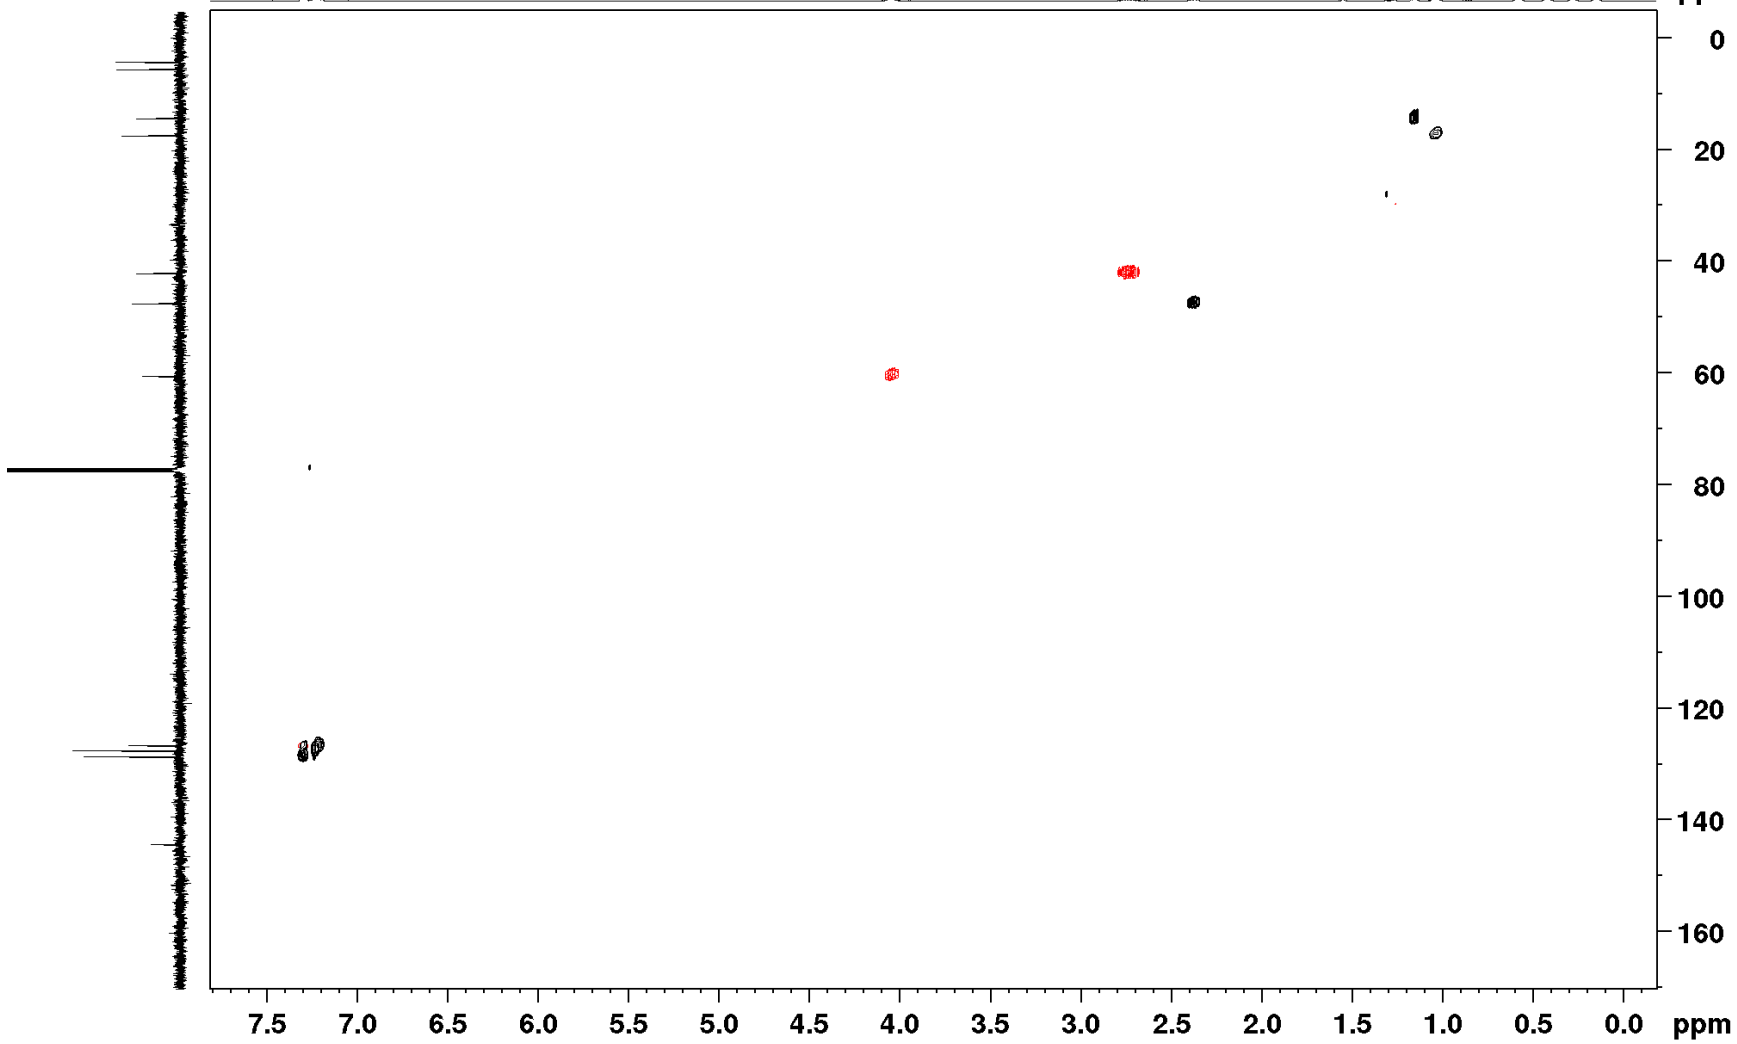

S235

$^1\text{H}$ - $^{13}\text{C}$  HMBC

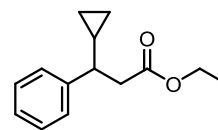

9p

ppm

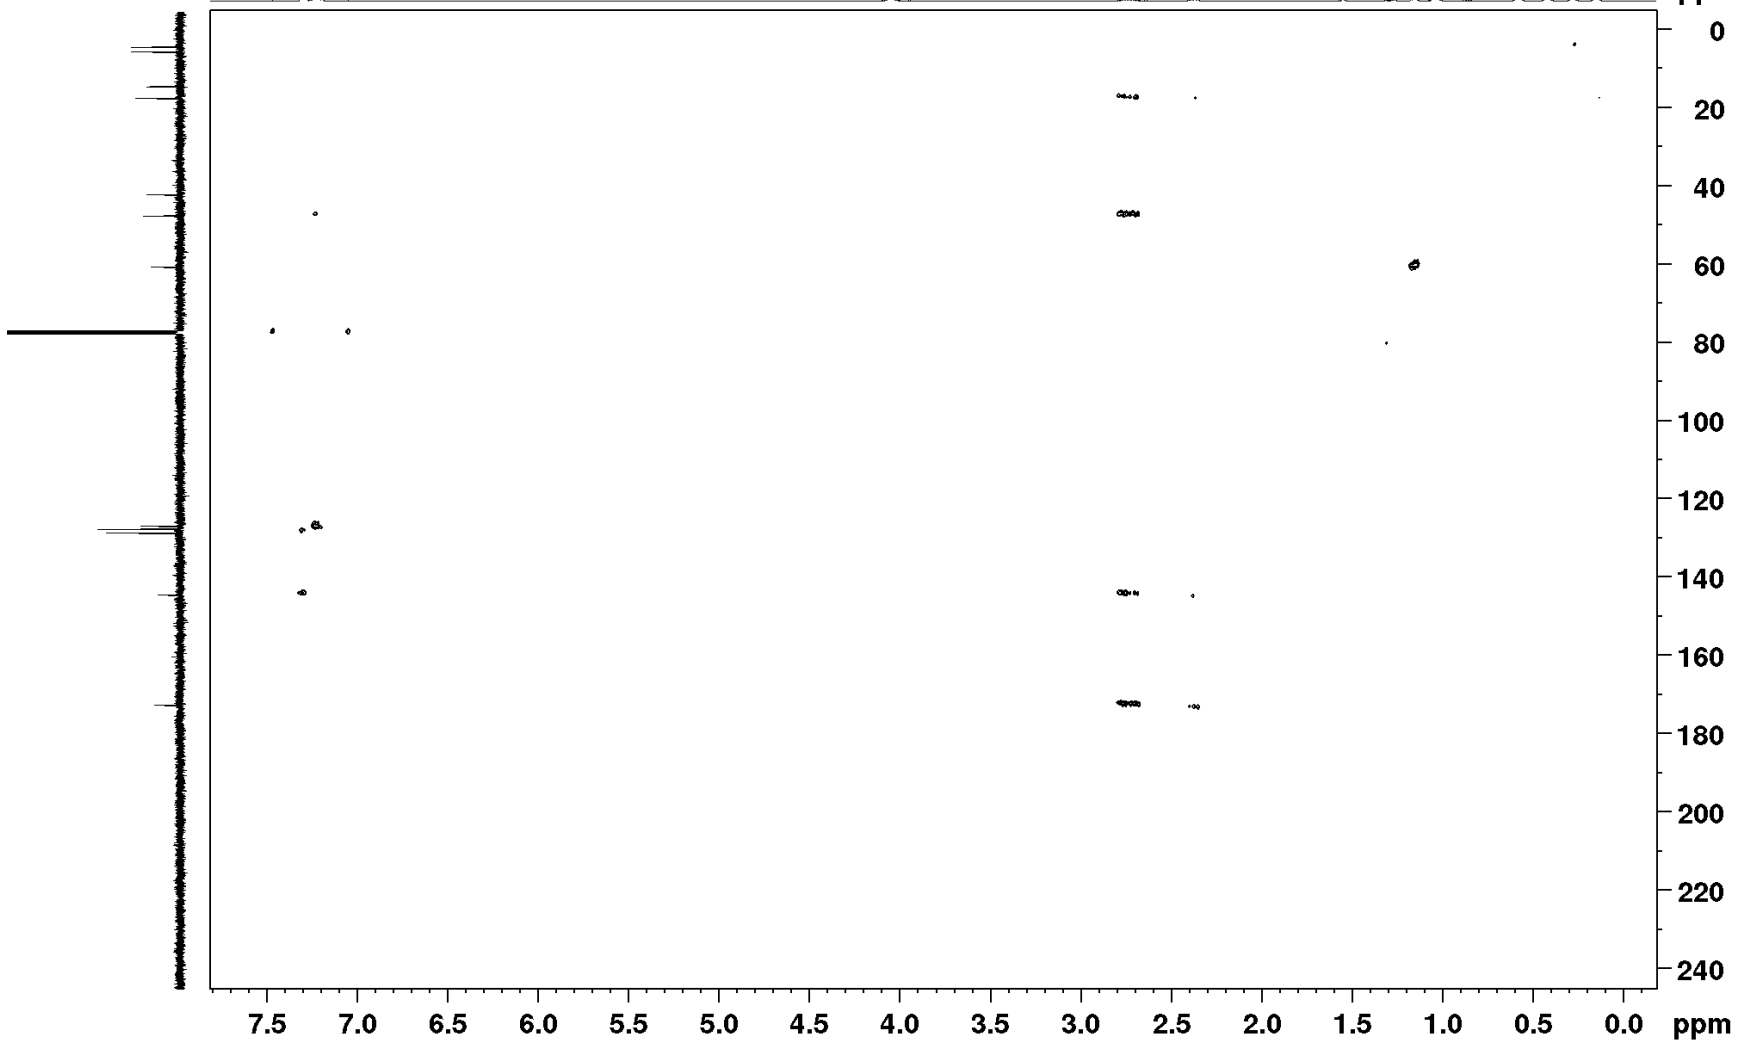



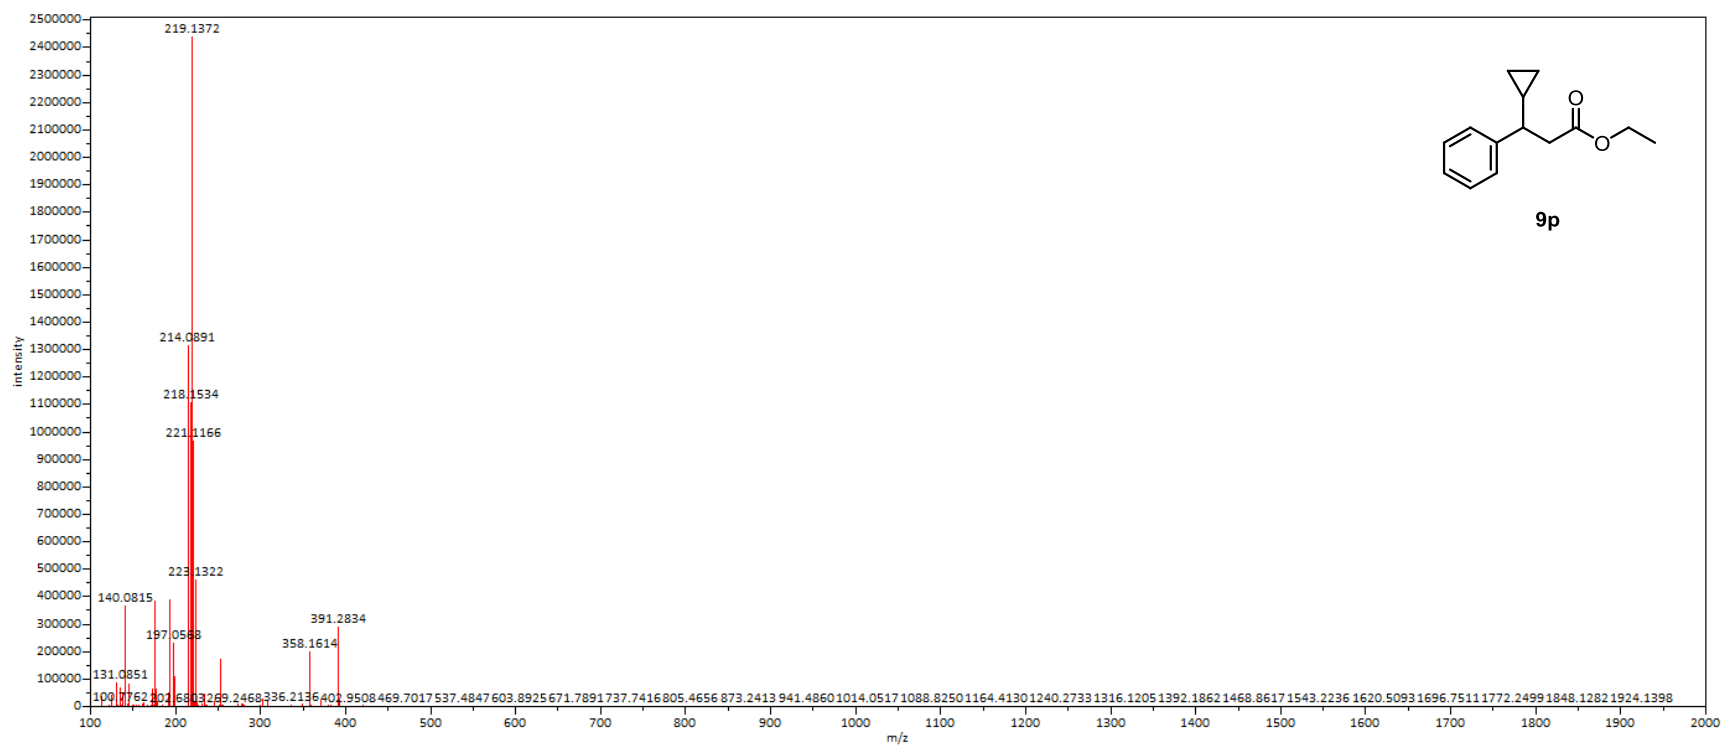

# Hex-5-en-1-yl 3-phenylbutanoate (9q)

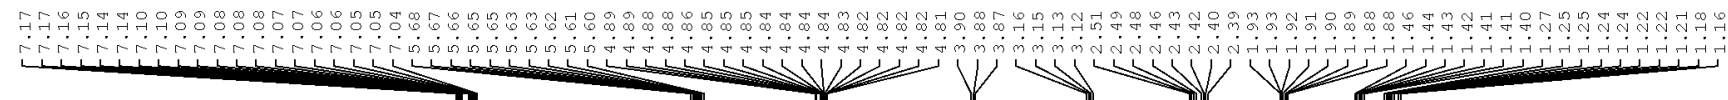

<sup>1</sup>H NMR

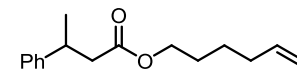

9q

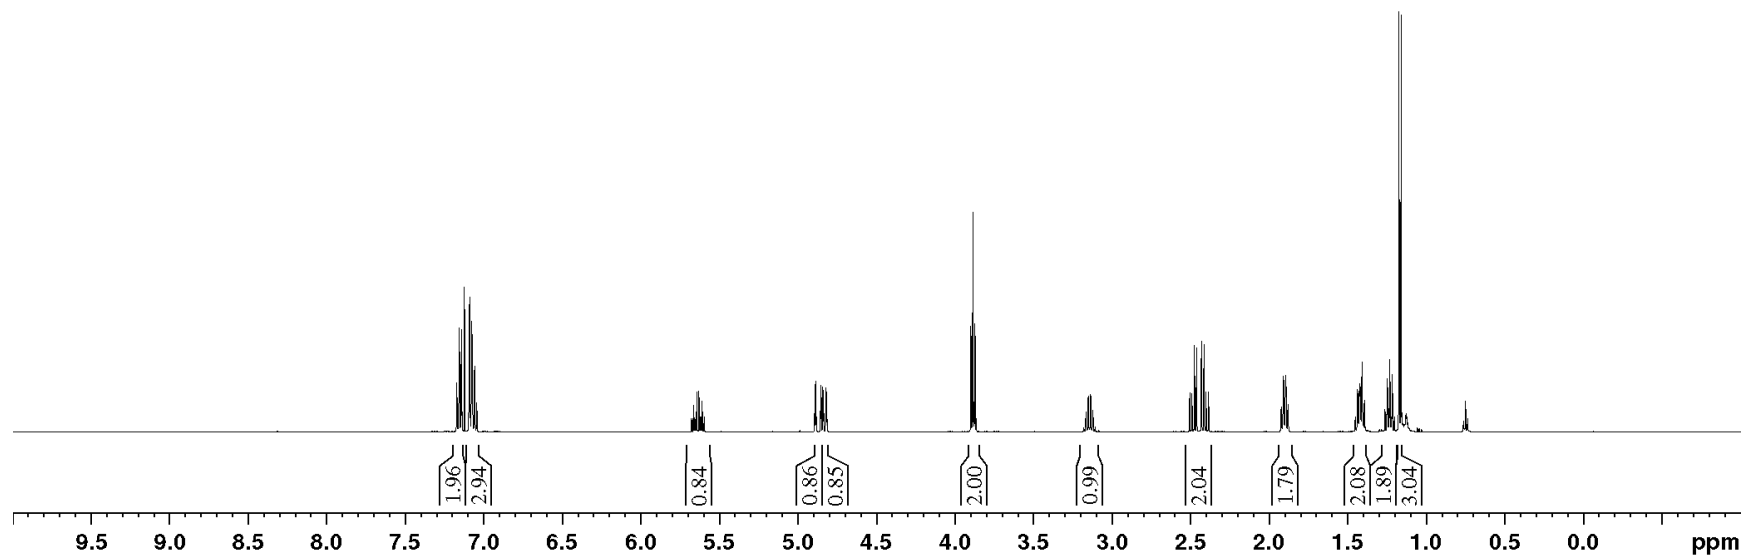

<sup>13</sup>C NMR

172.6

145.9

138.5

128.6

126.9

126.5

114.9

64.4

43.1

36.7

33.4

28.2

25.3

22.0

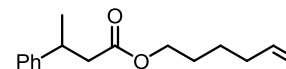

9q

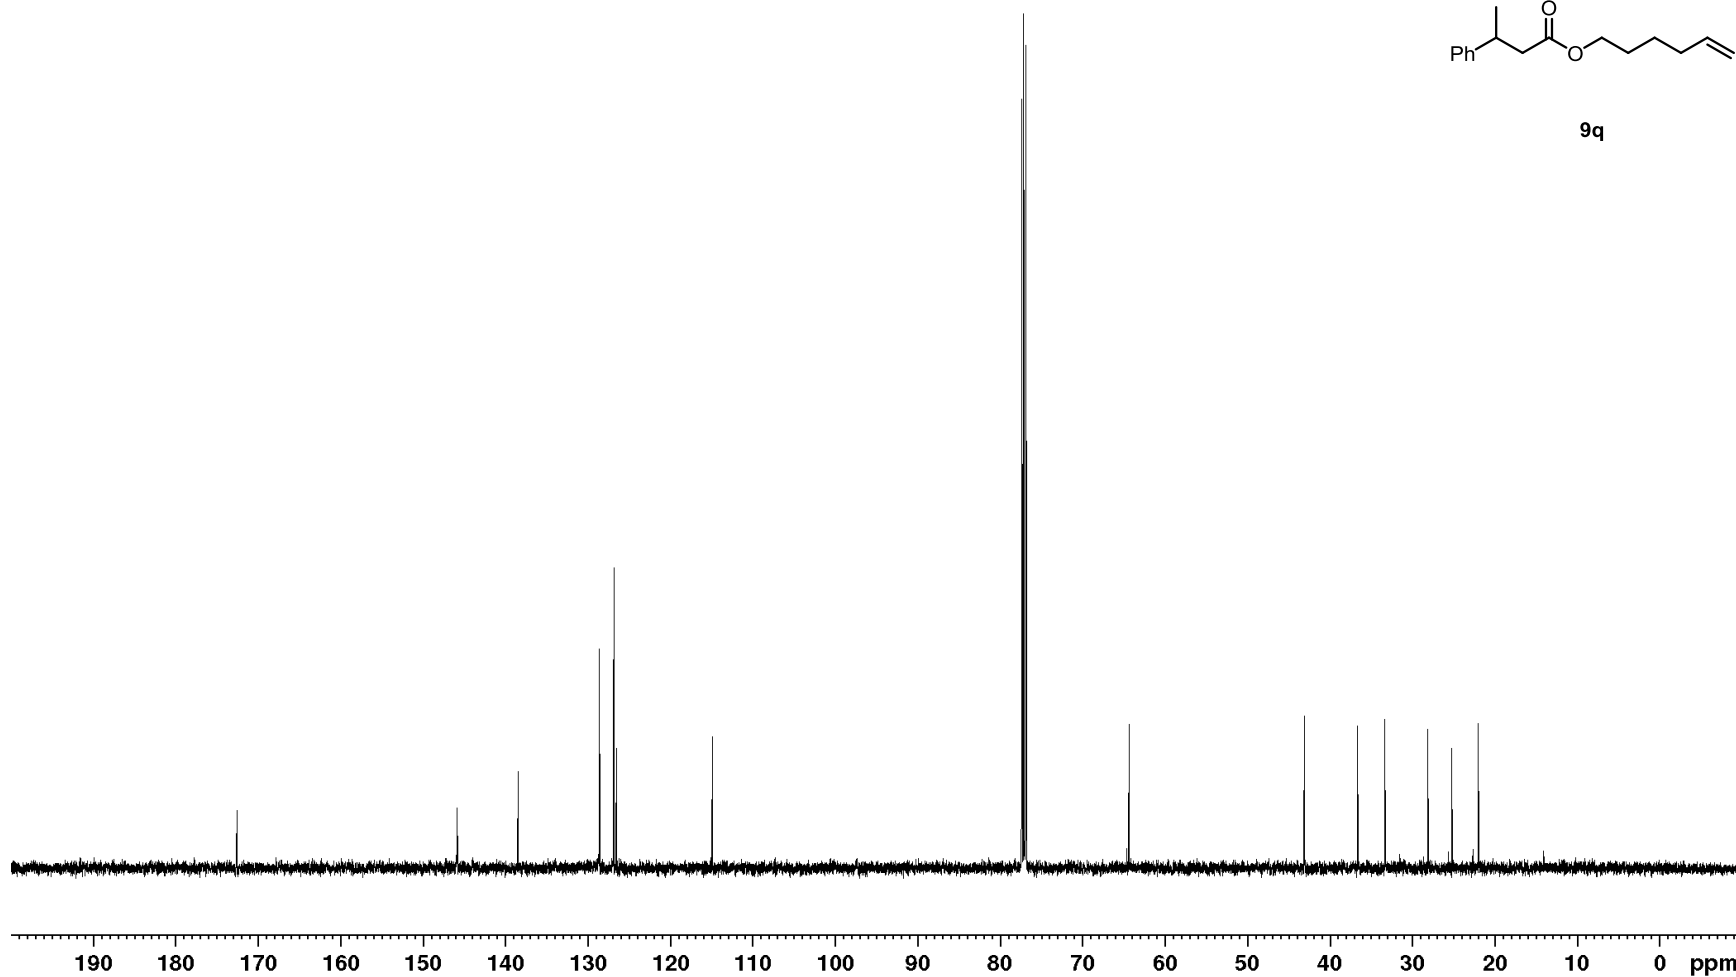

$^1\text{H}$ - $^1\text{H}$  COSY

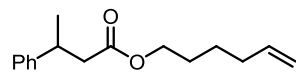

9q

ppm

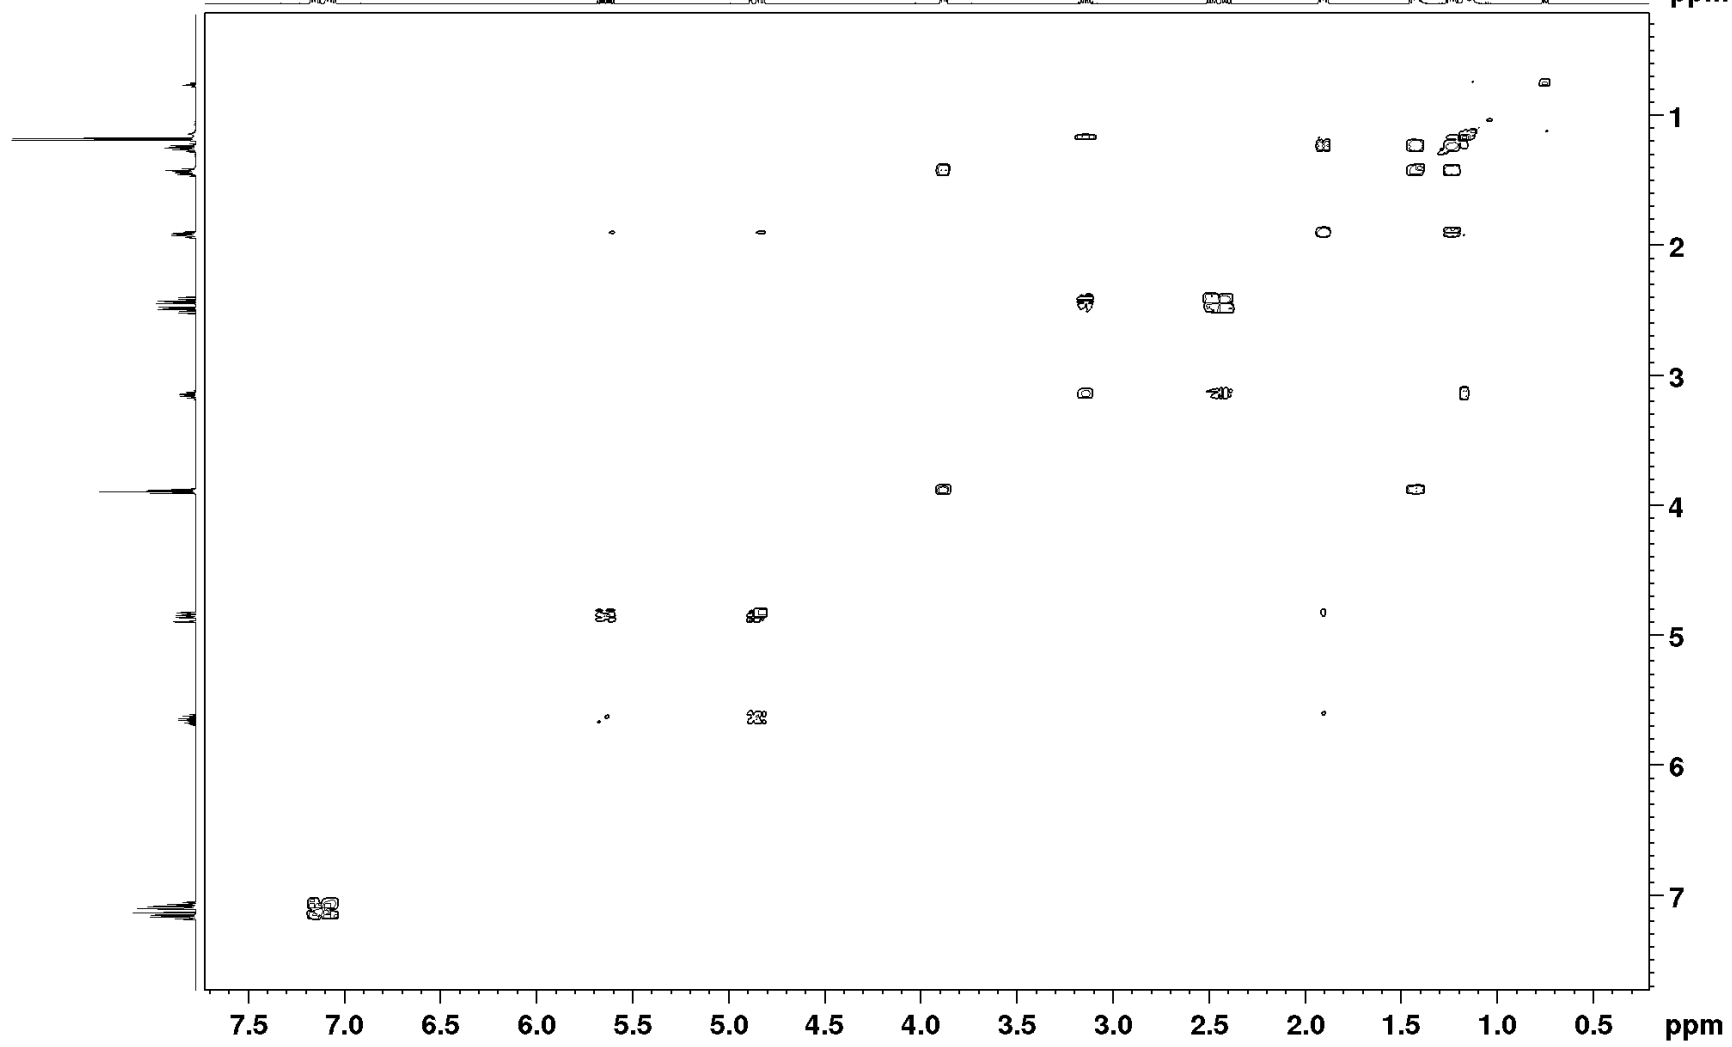

$^1\text{H}$ - $^{13}\text{C}$  HSQC

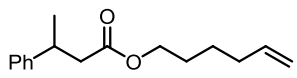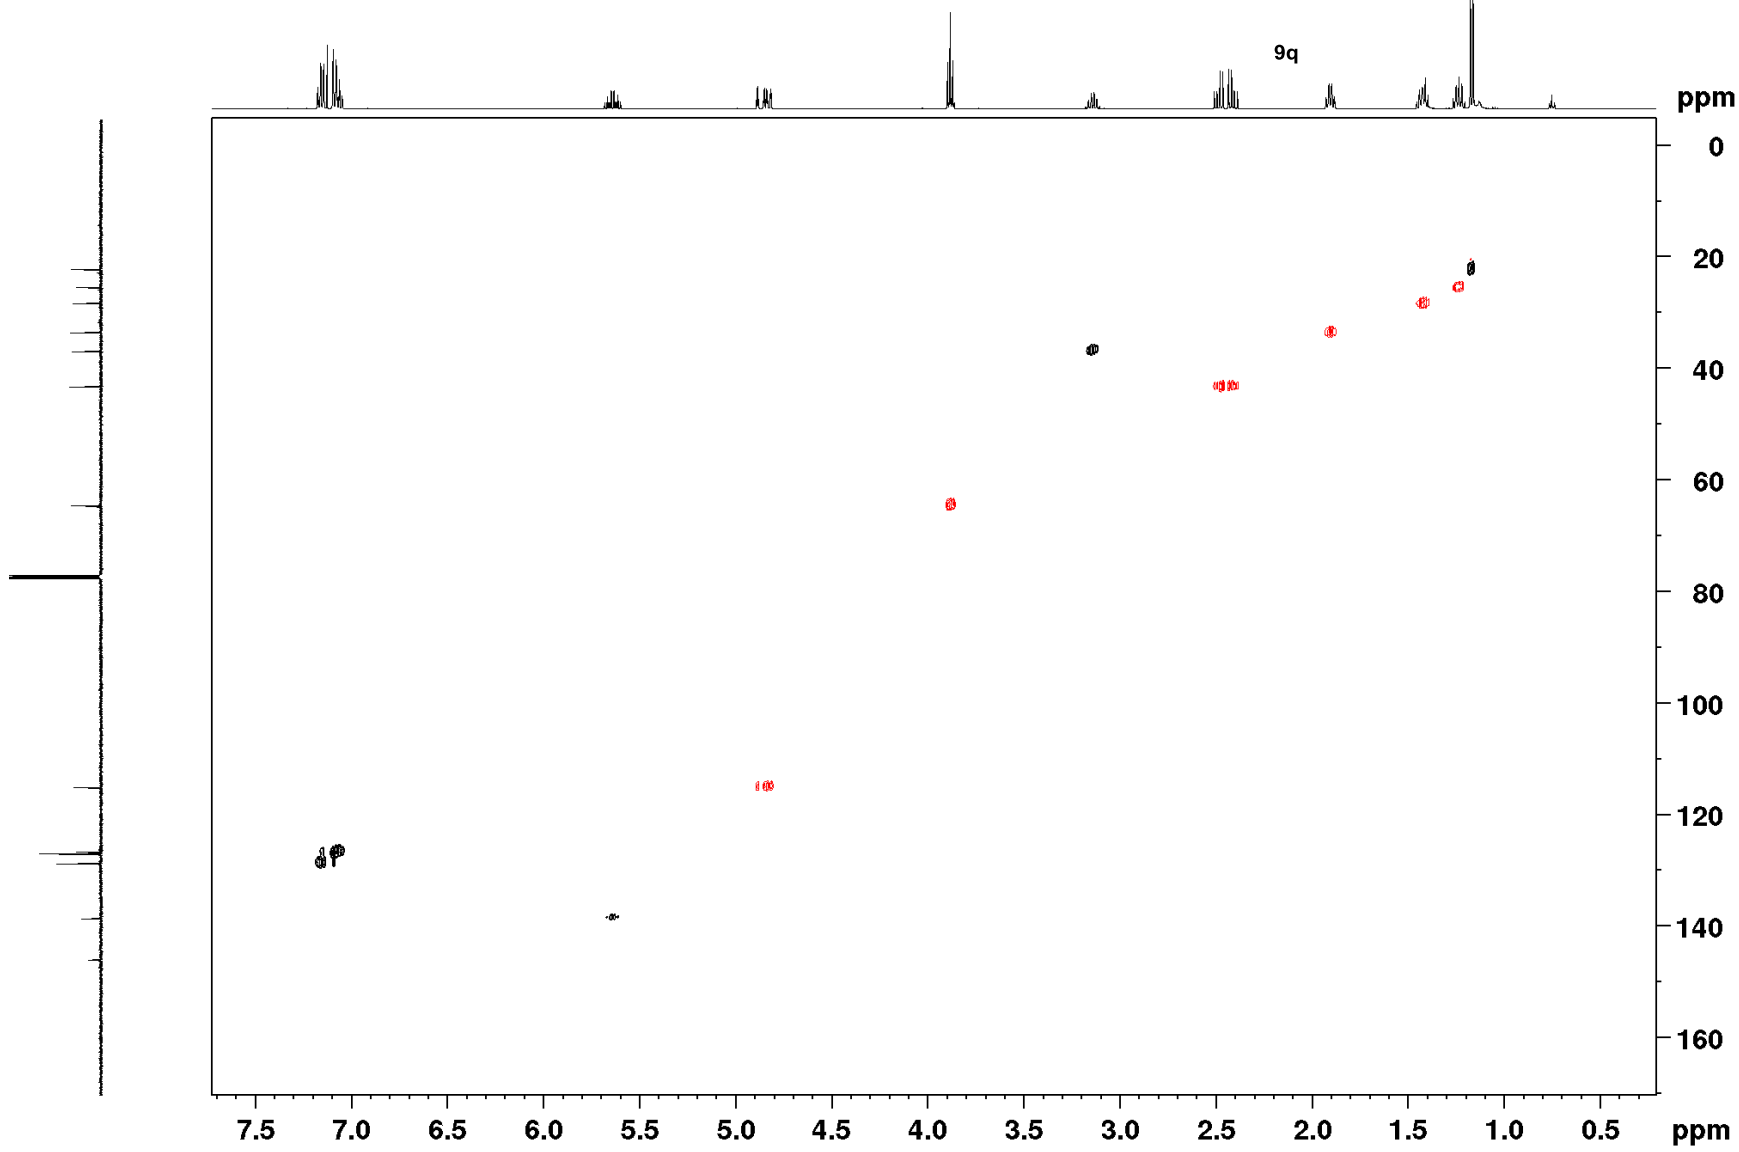

$^1\text{H}$ - $^{13}\text{C}$  HMBC

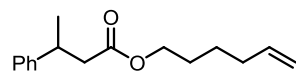

9q

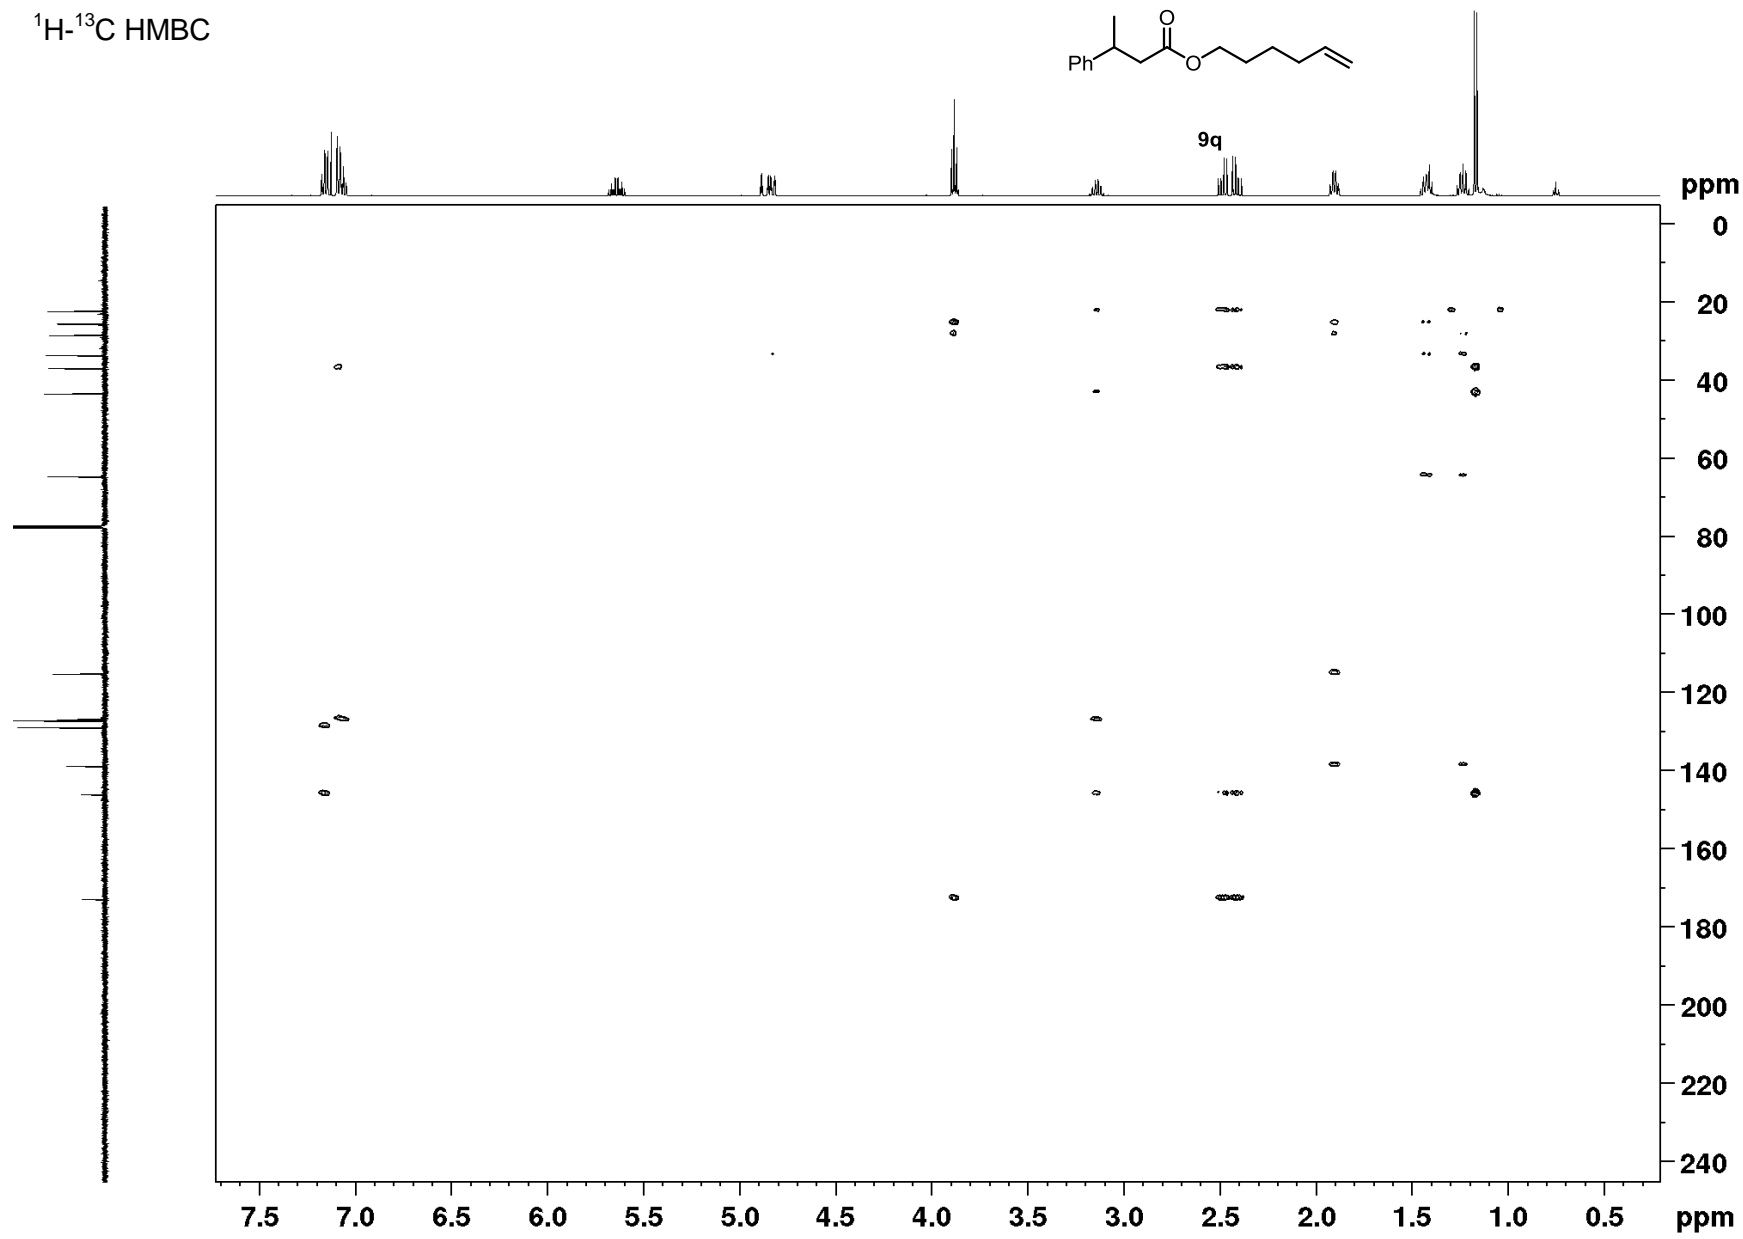

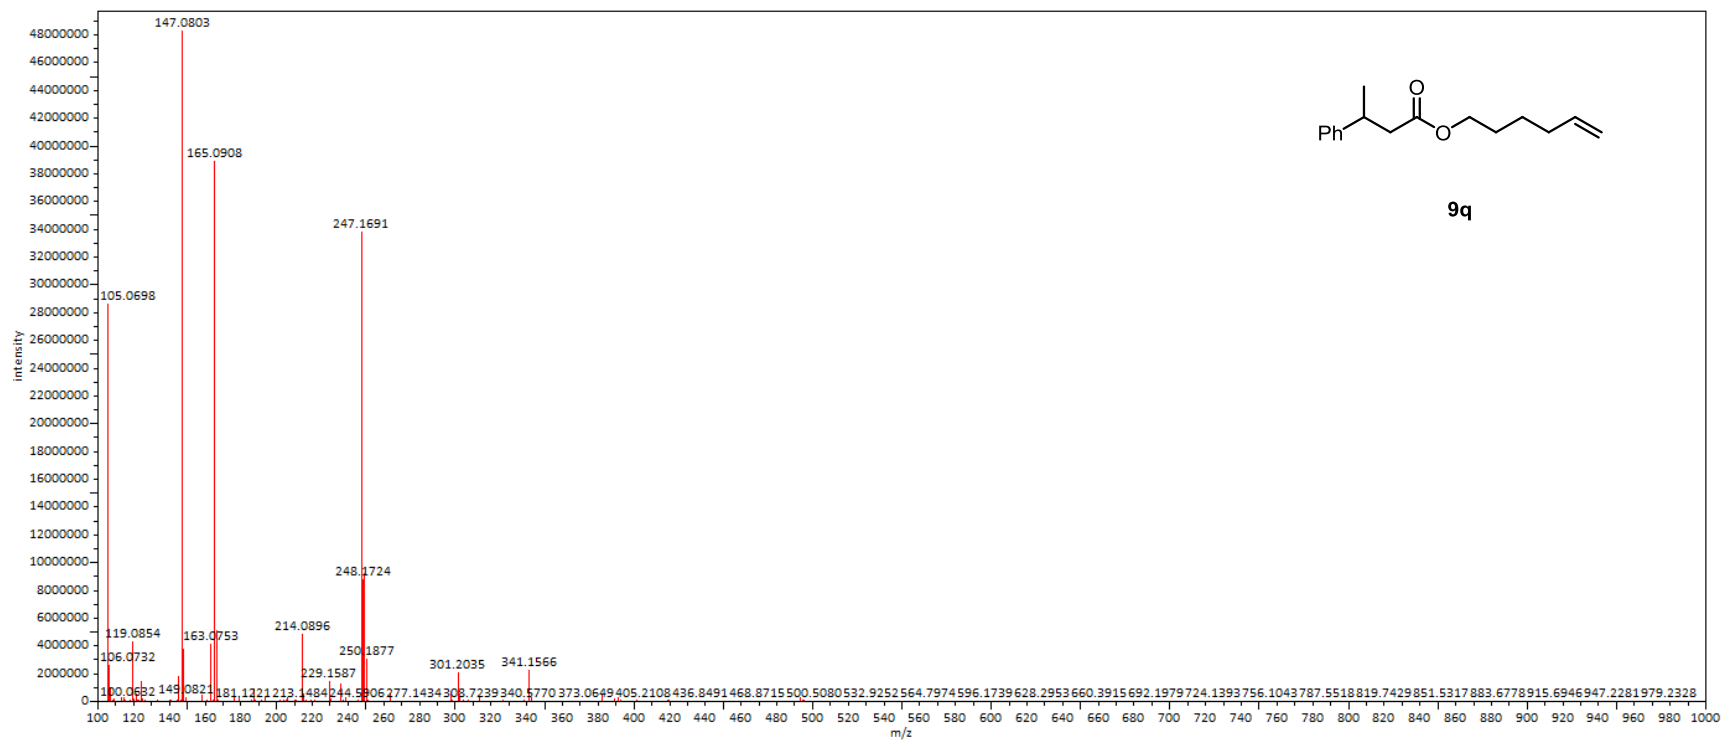

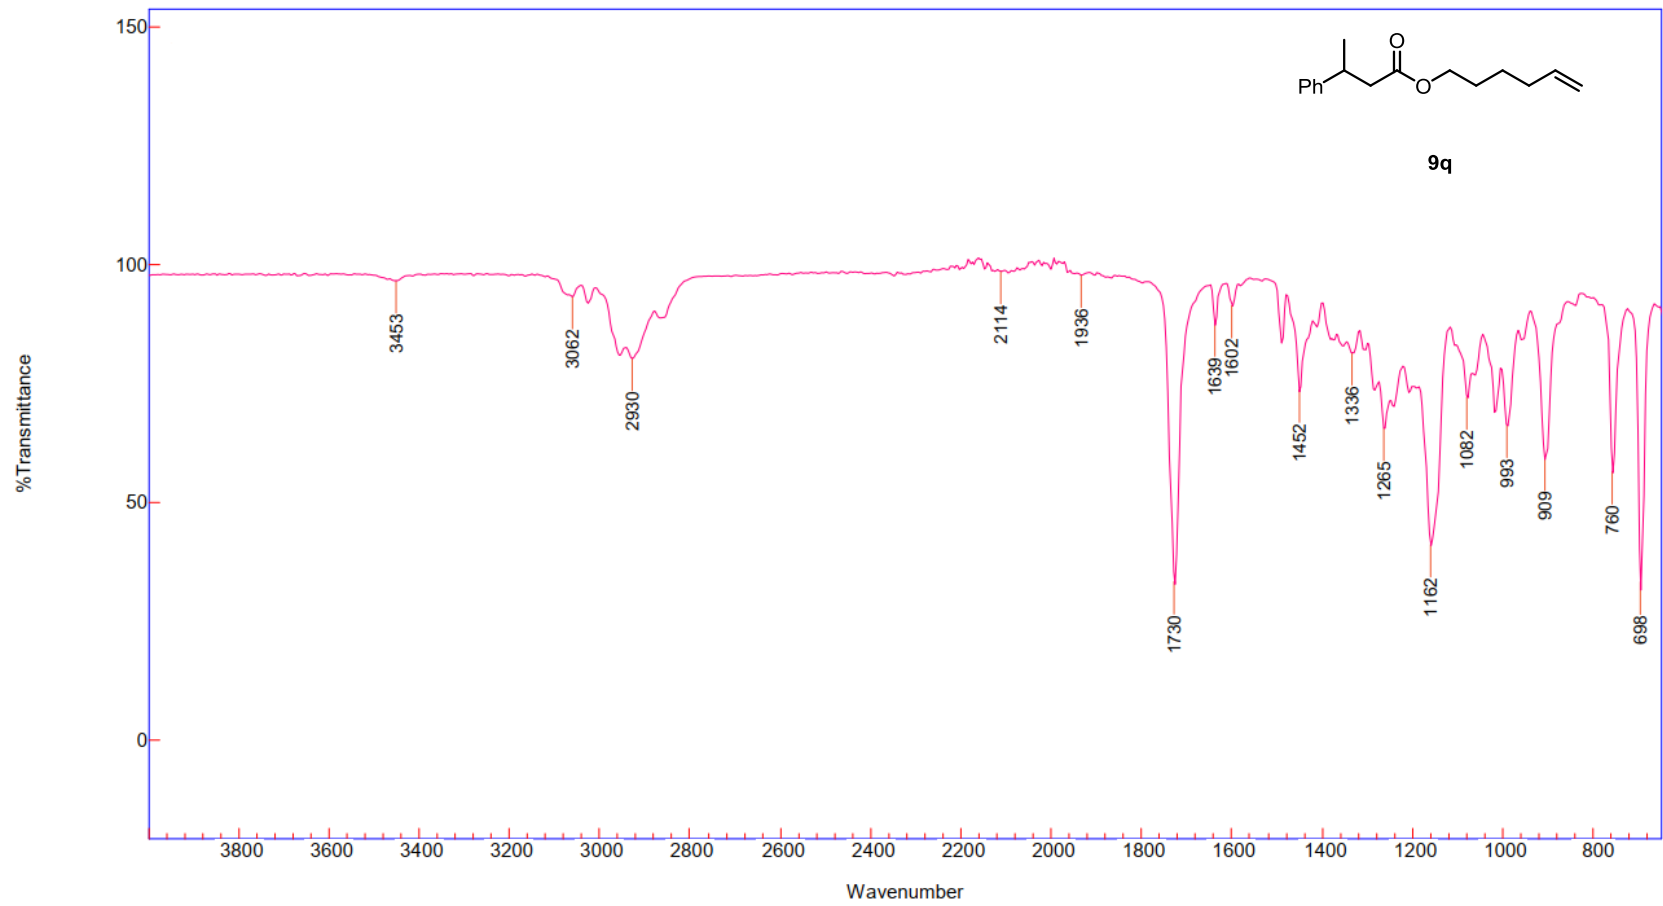



Diethyl 3,3'-(1,4-phenylene)dibutyrate (9r)

<sup>1</sup>H NMR

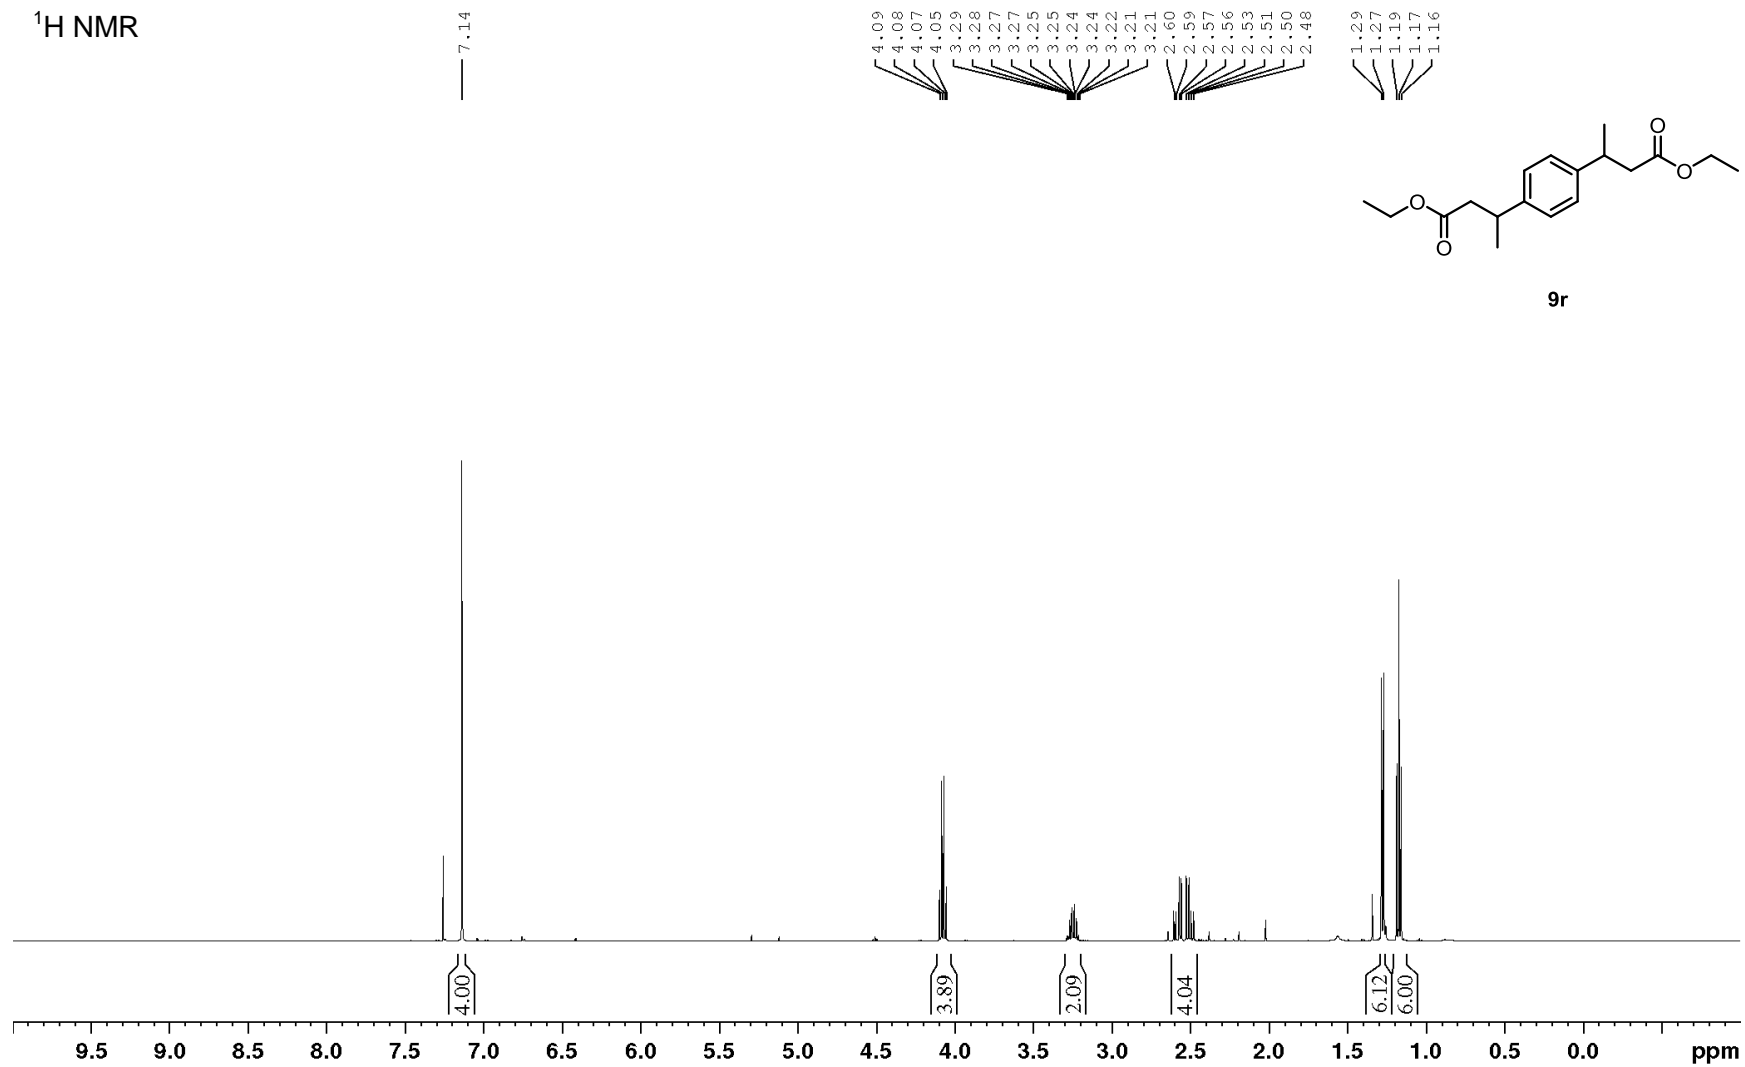

<sup>13</sup>C NMR

172.6

143.9

127.0

60.4

43.2

36.2

21.9

14.3

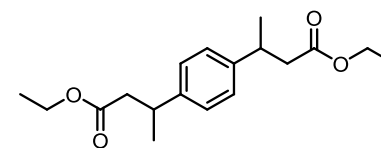

9r

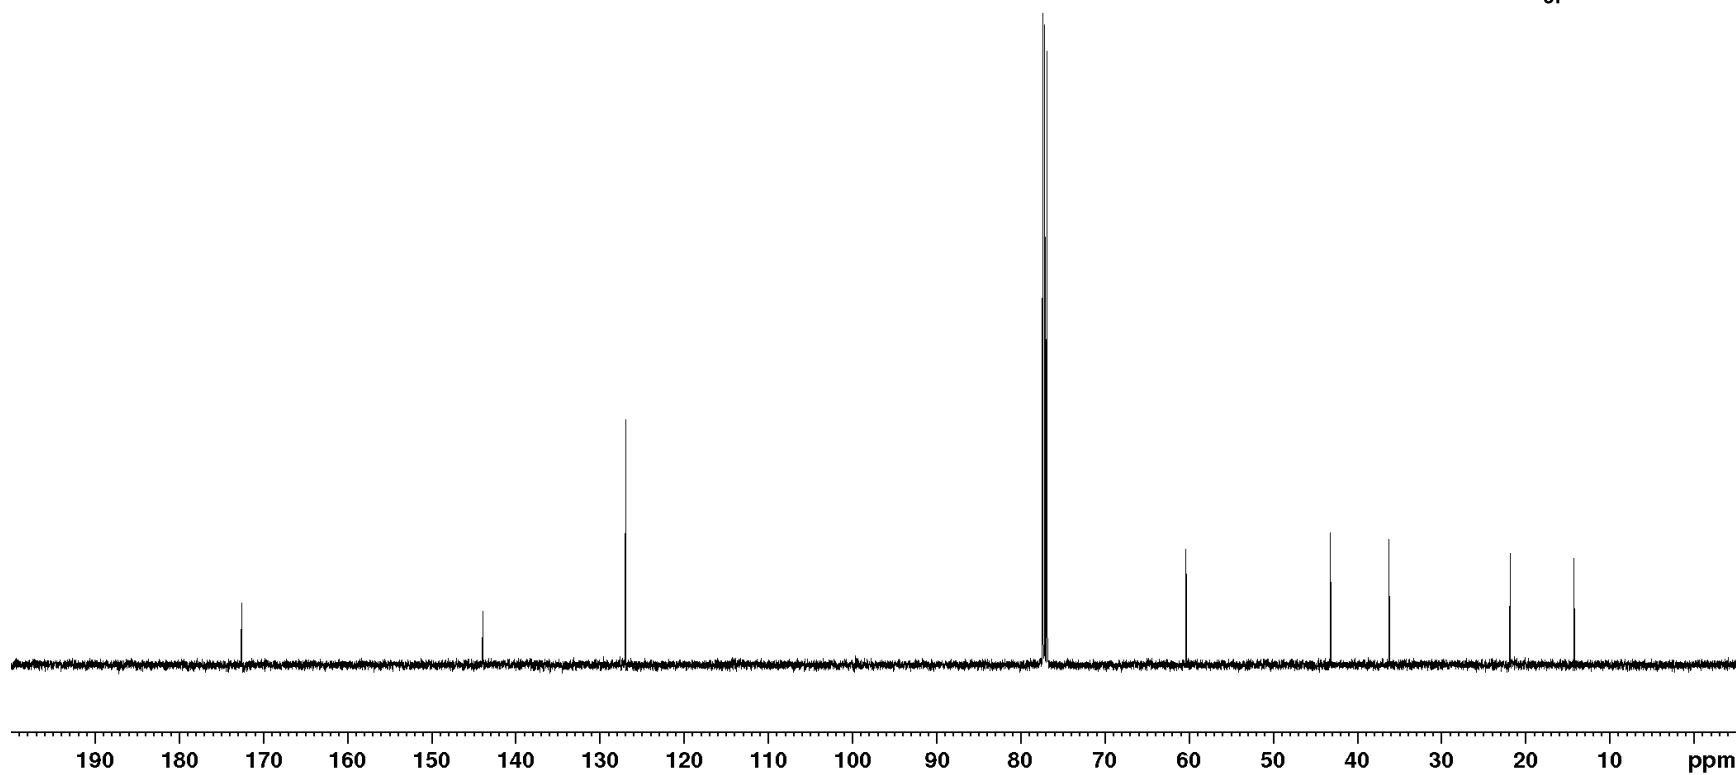

$^1\text{H}$ - $^1\text{H}$  COSY

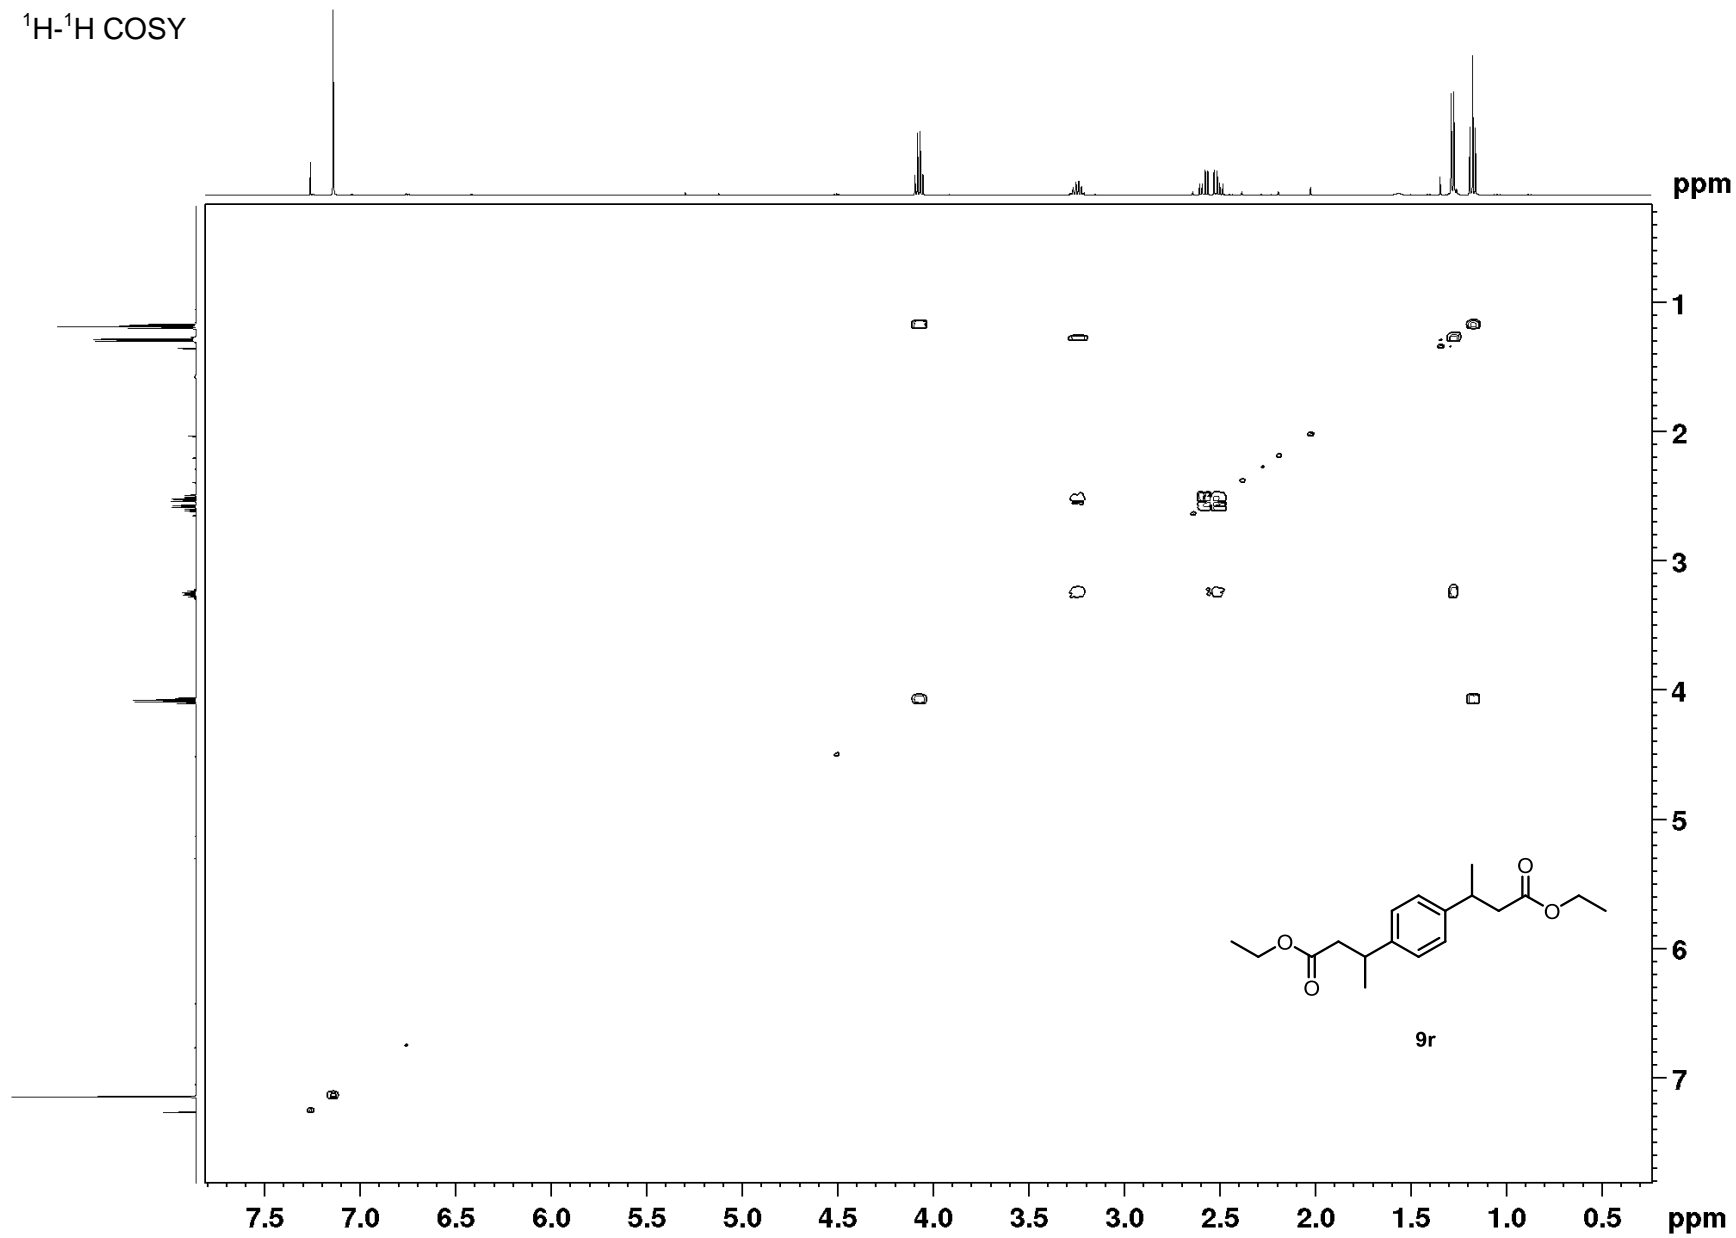

S247

$^1\text{H}$ - $^{13}\text{C}$  HSQC

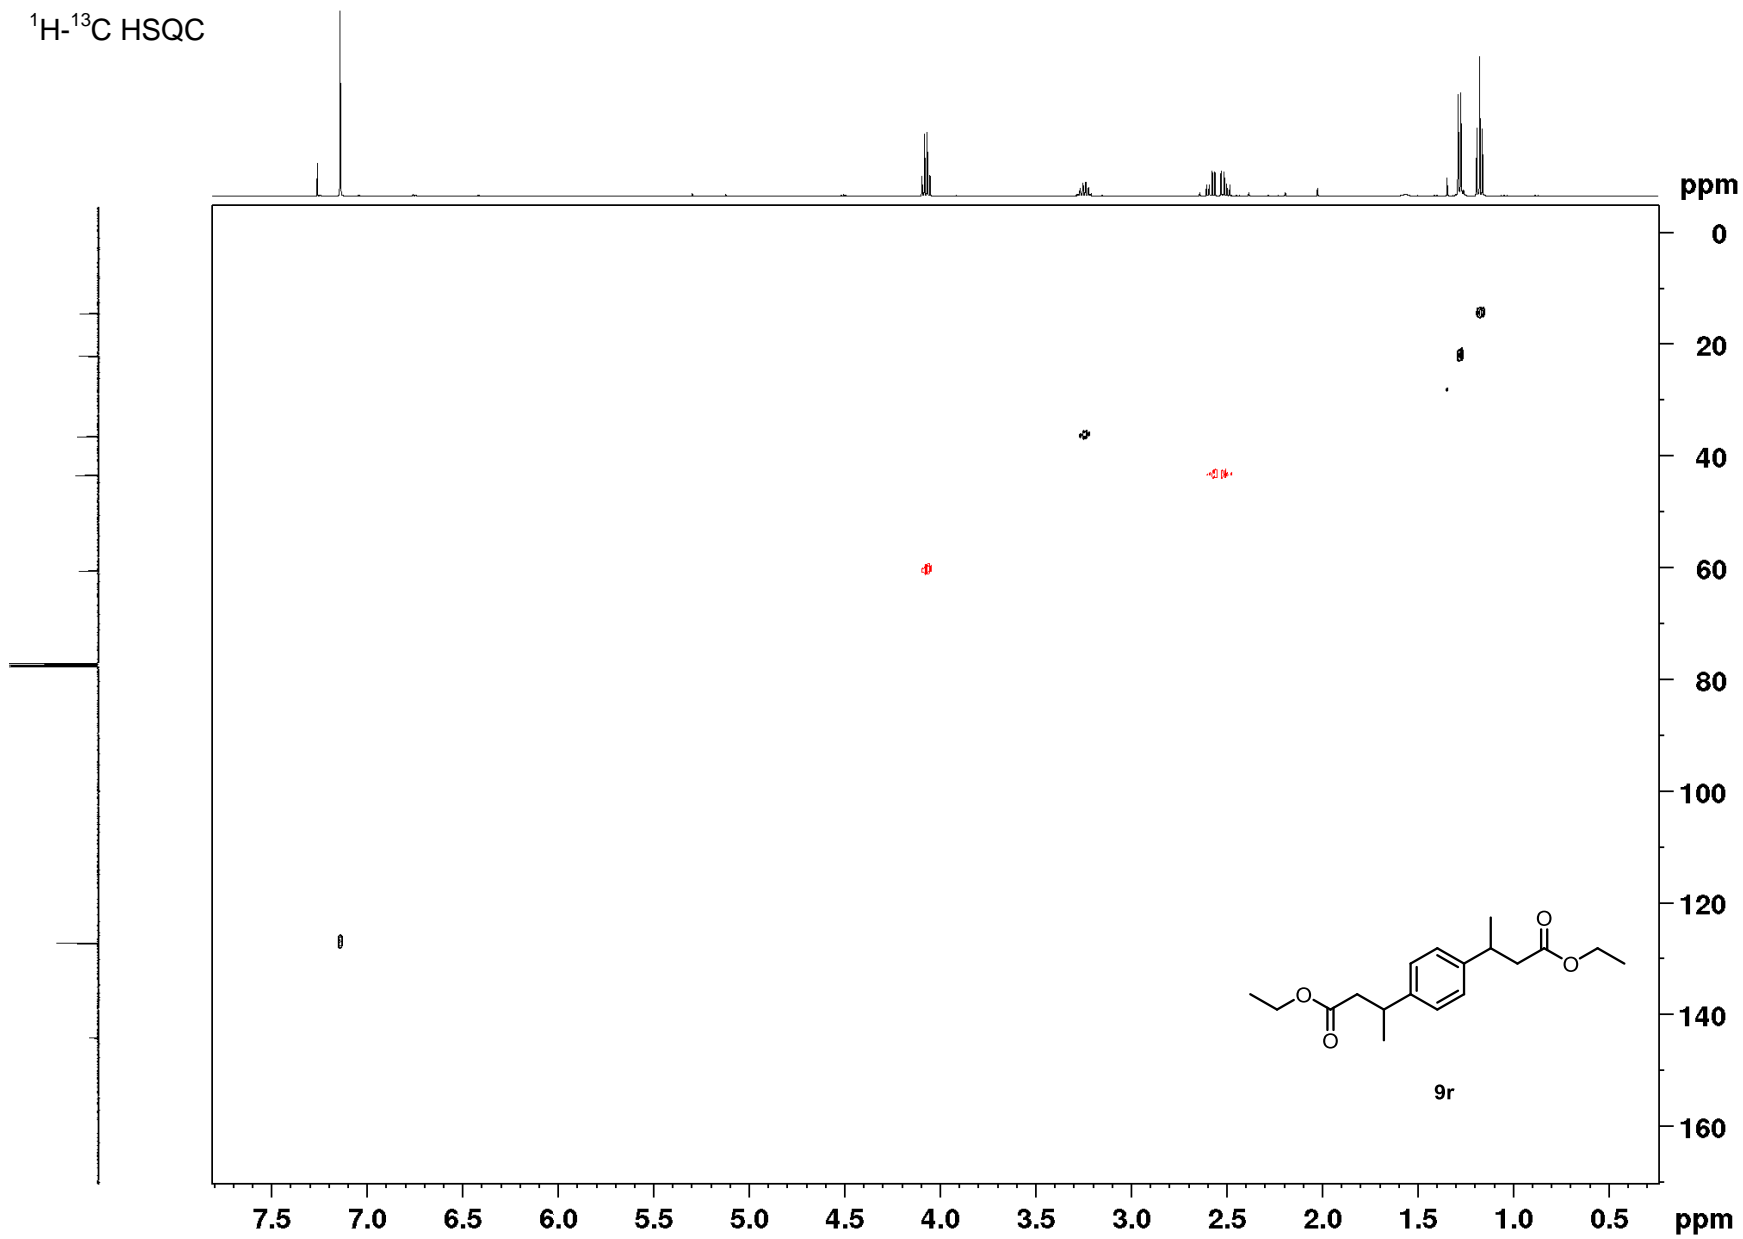

S248

$^1\text{H}$ - $^{13}\text{C}$  HMBC

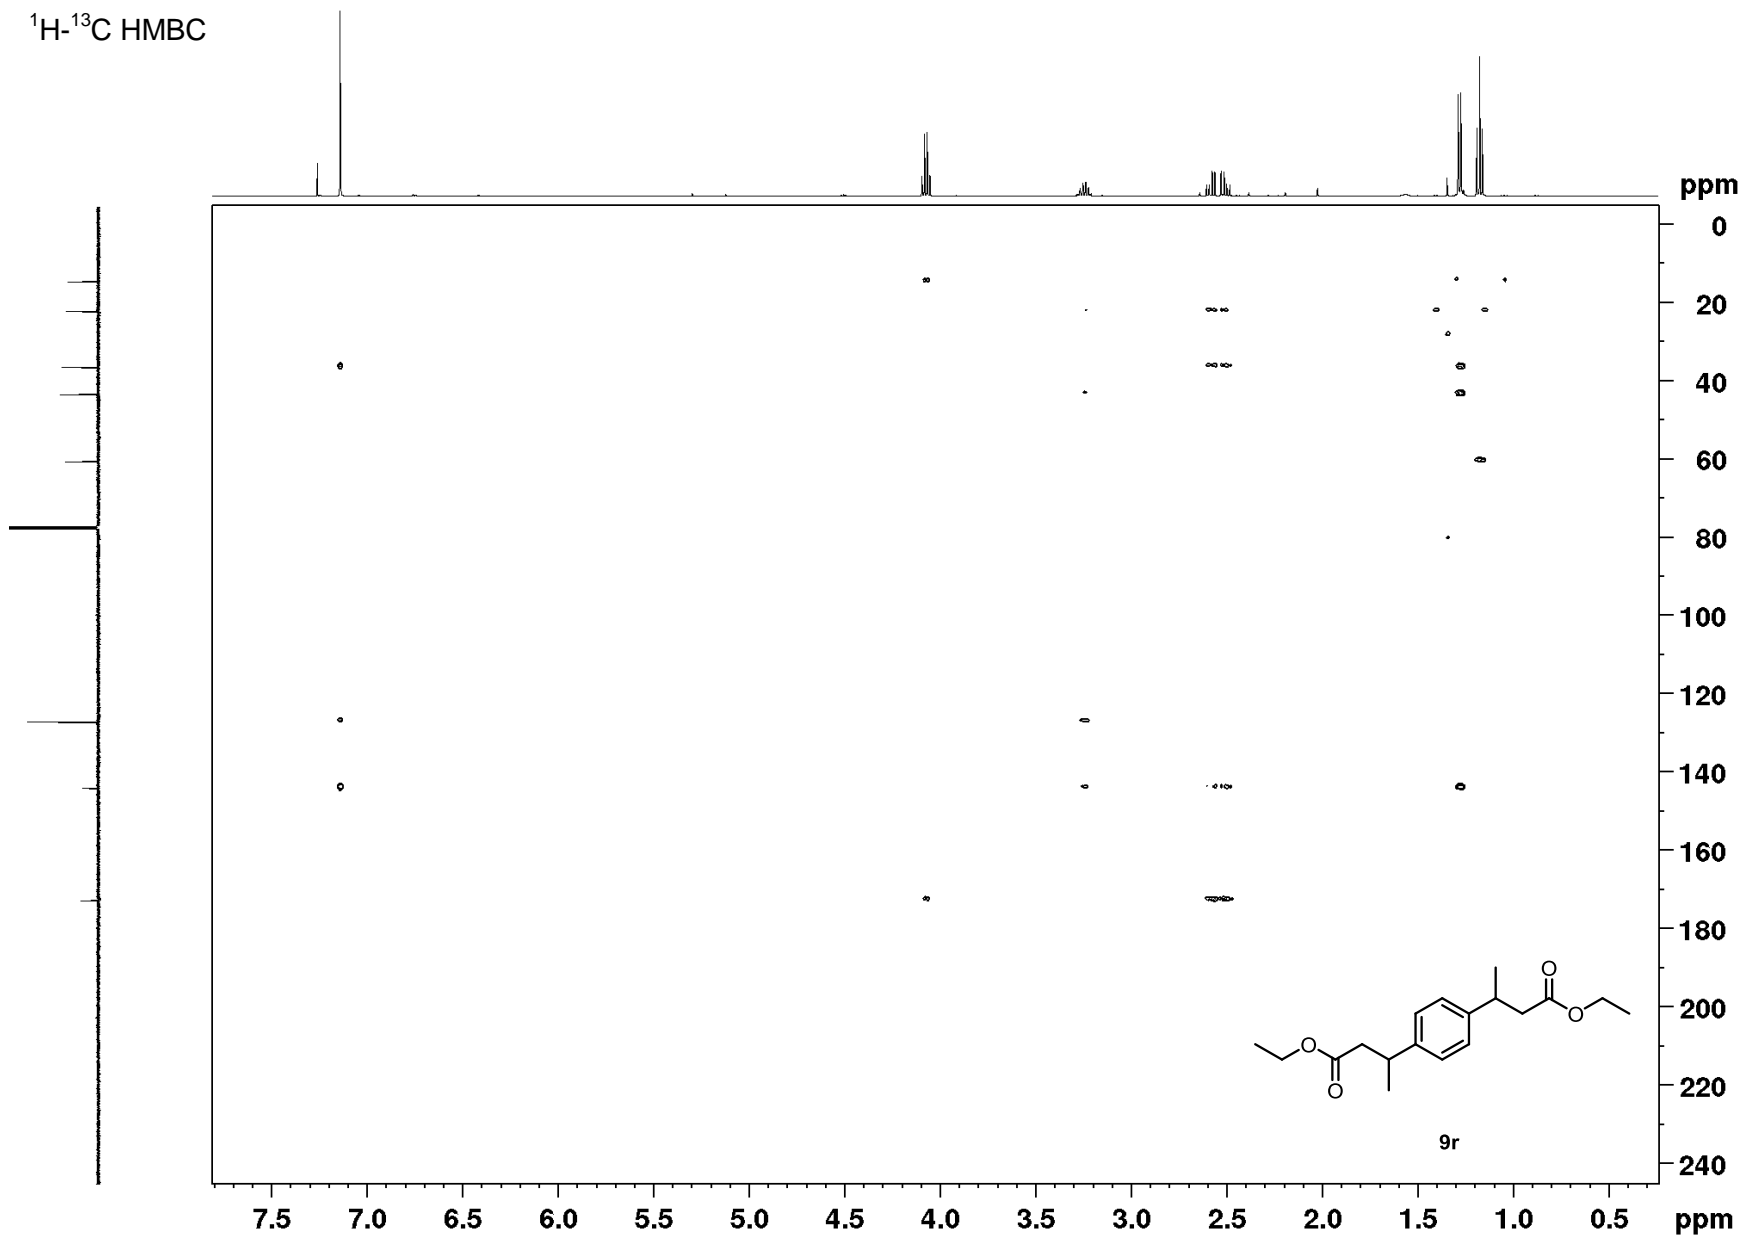

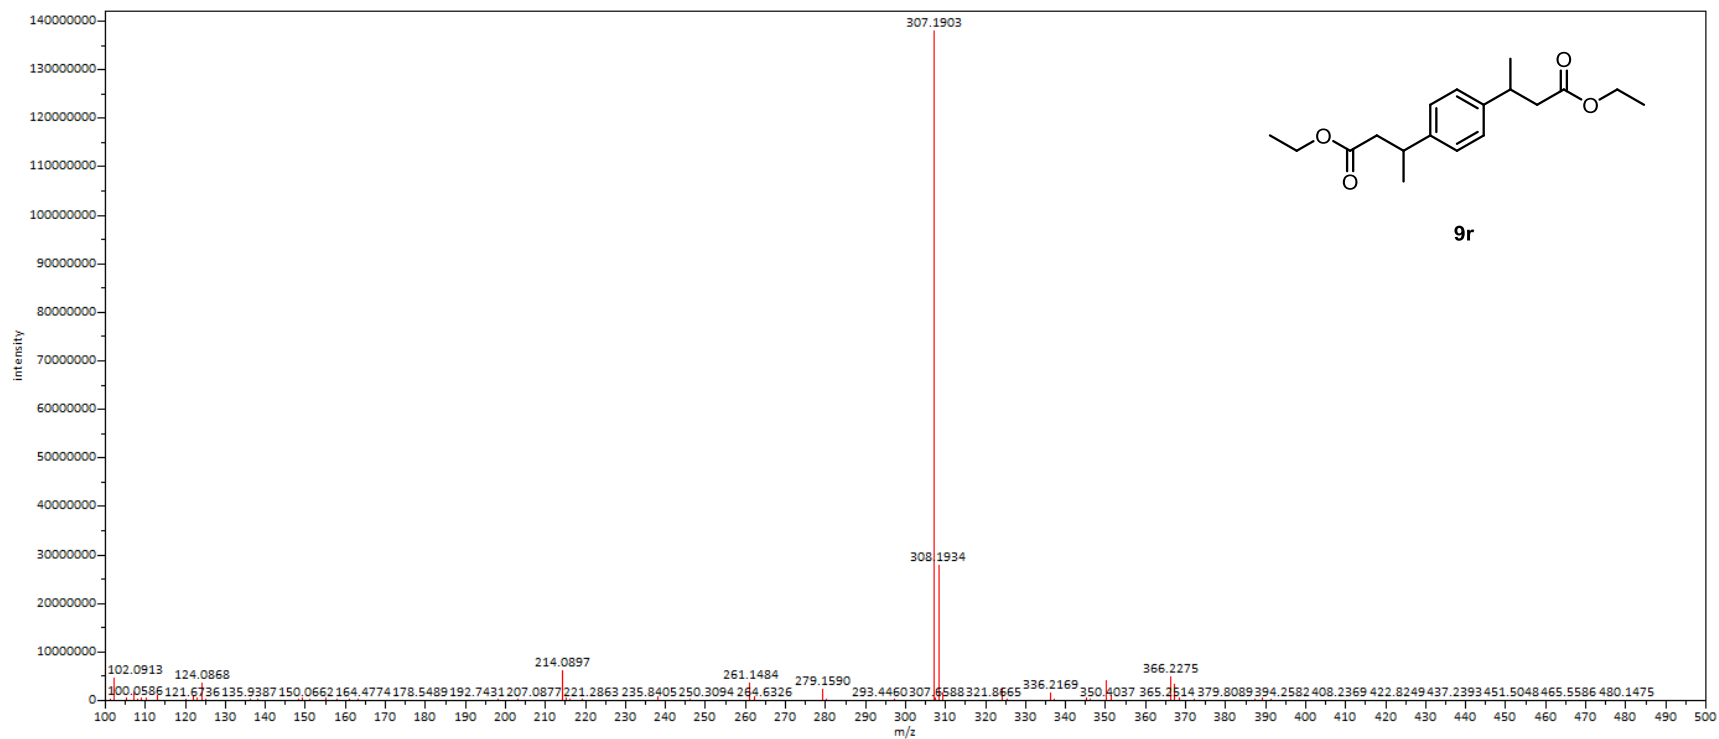

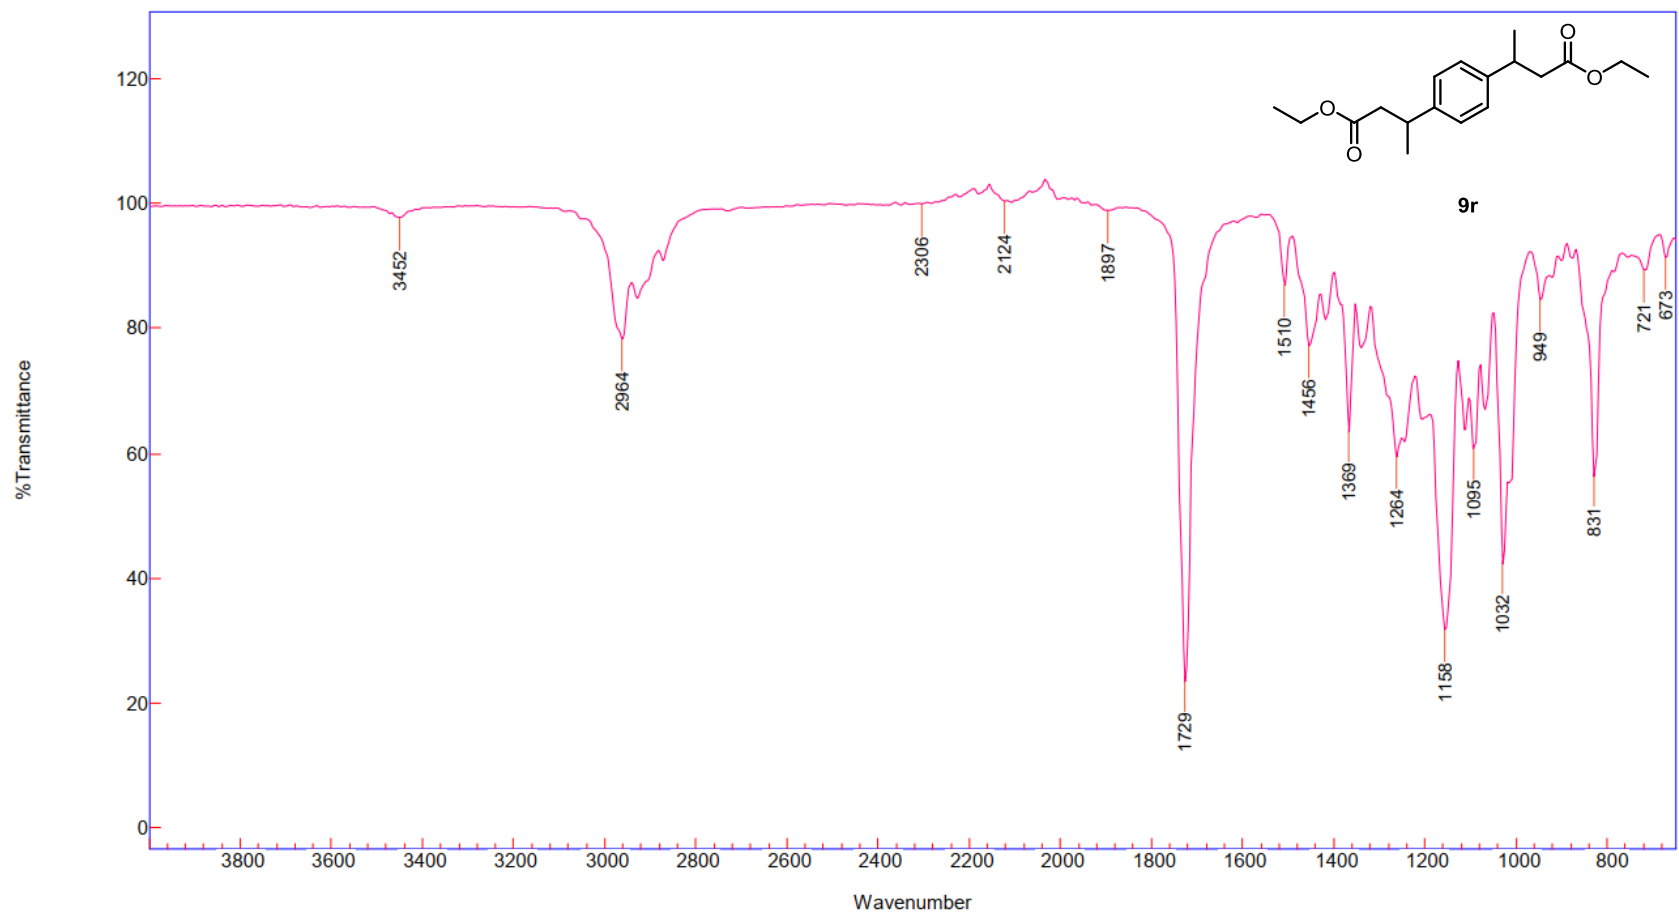

# Ethyl-2-methyl-3-phenylbutanoate (9s)

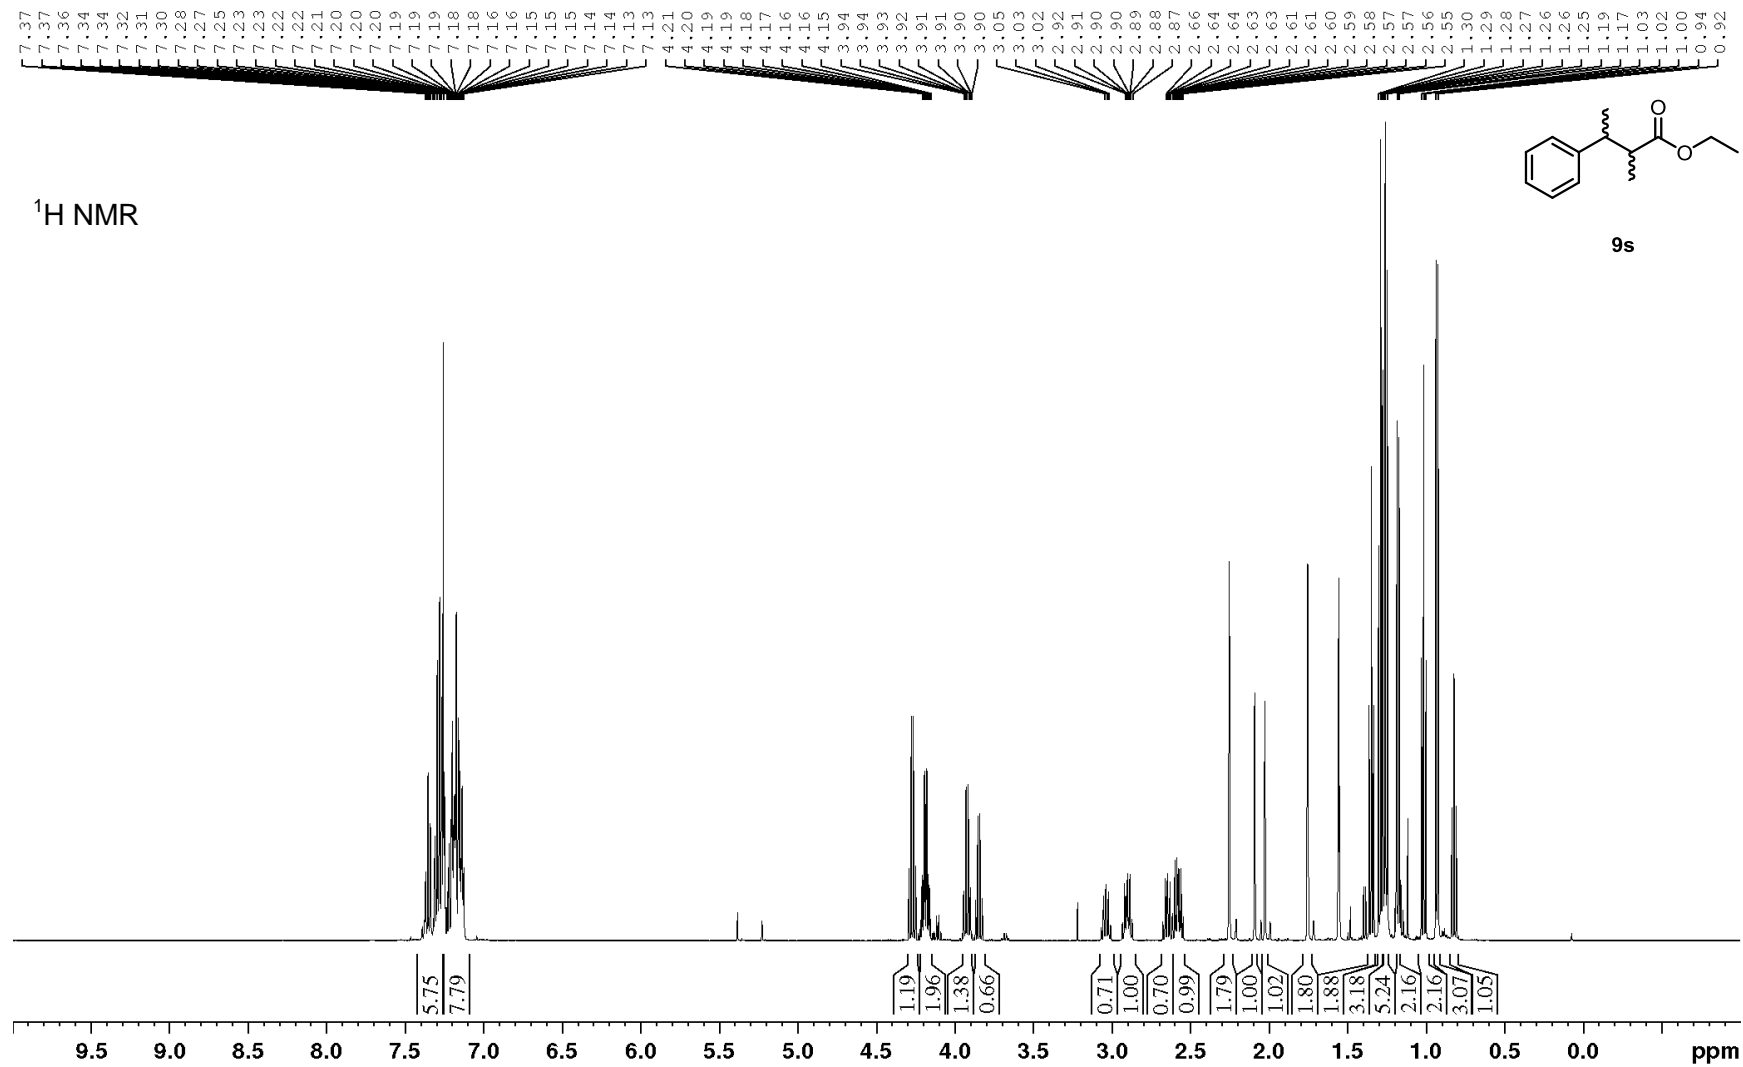



<sup>13</sup>C NMR

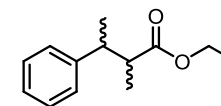

9s

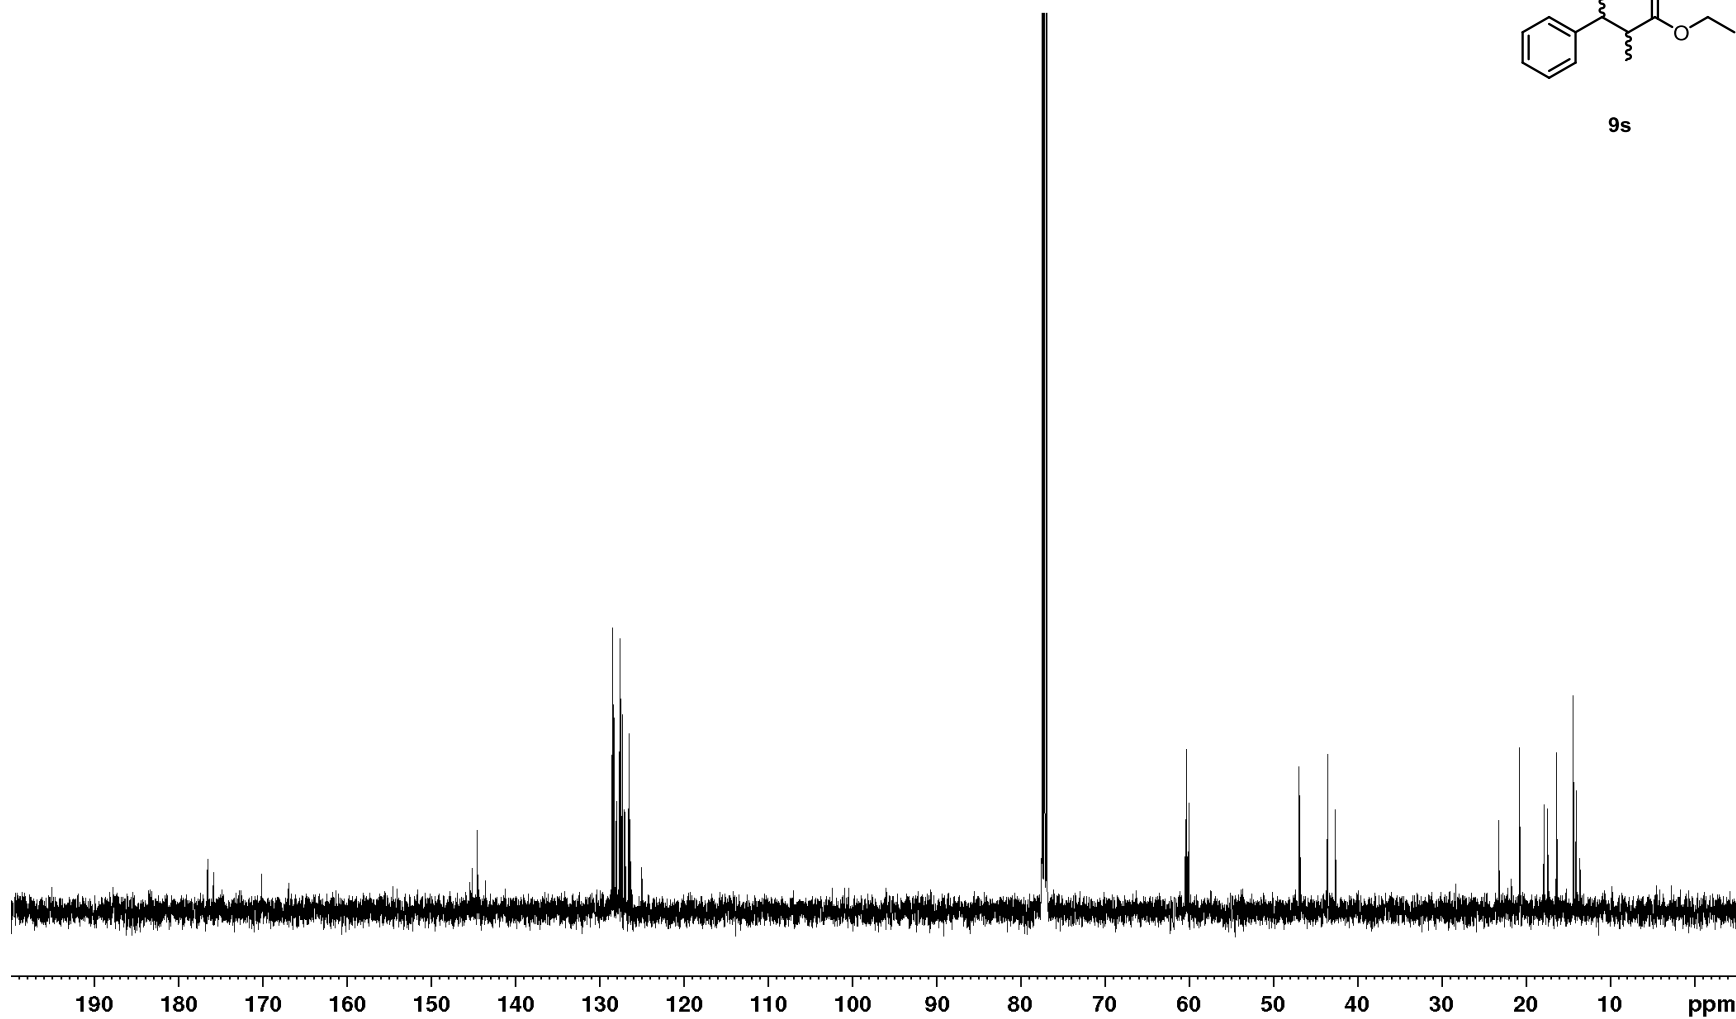

$^1\text{H}$ - $^1\text{H}$  COSY

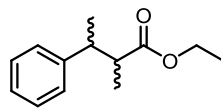

9s

ppm

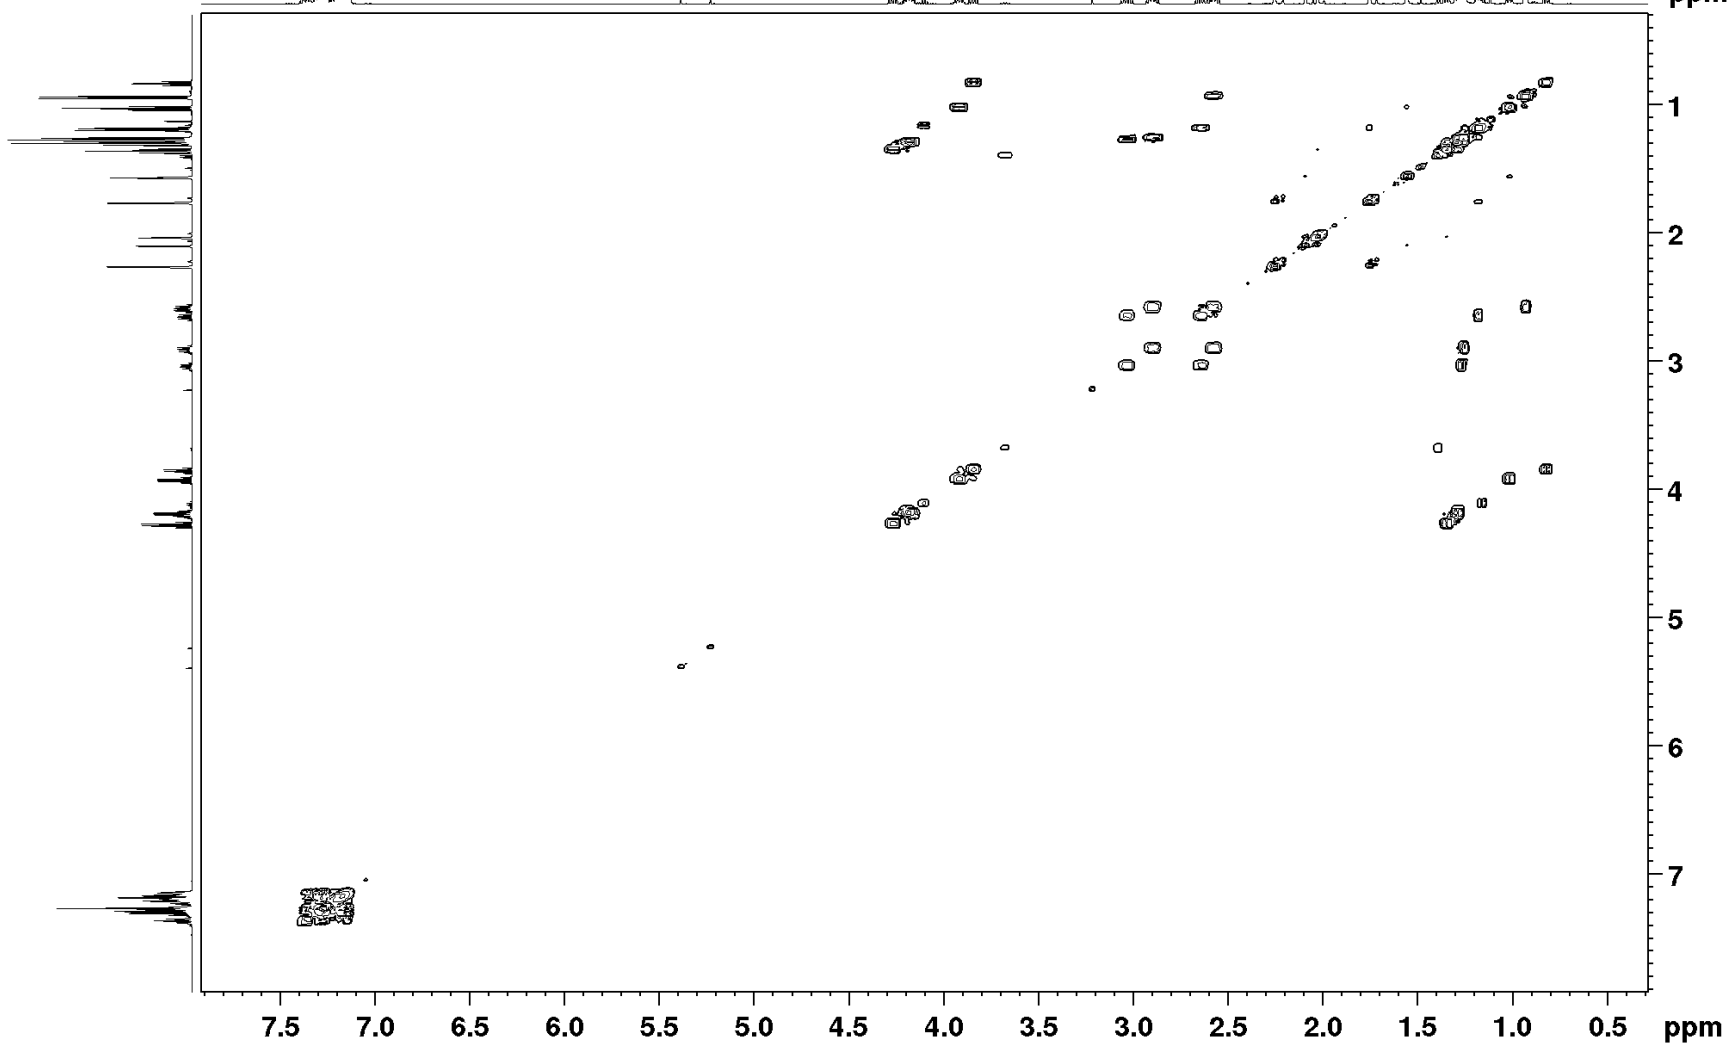

S254

$^1\text{H}$ - $^{13}\text{C}$  HSQC

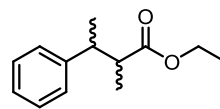

9s

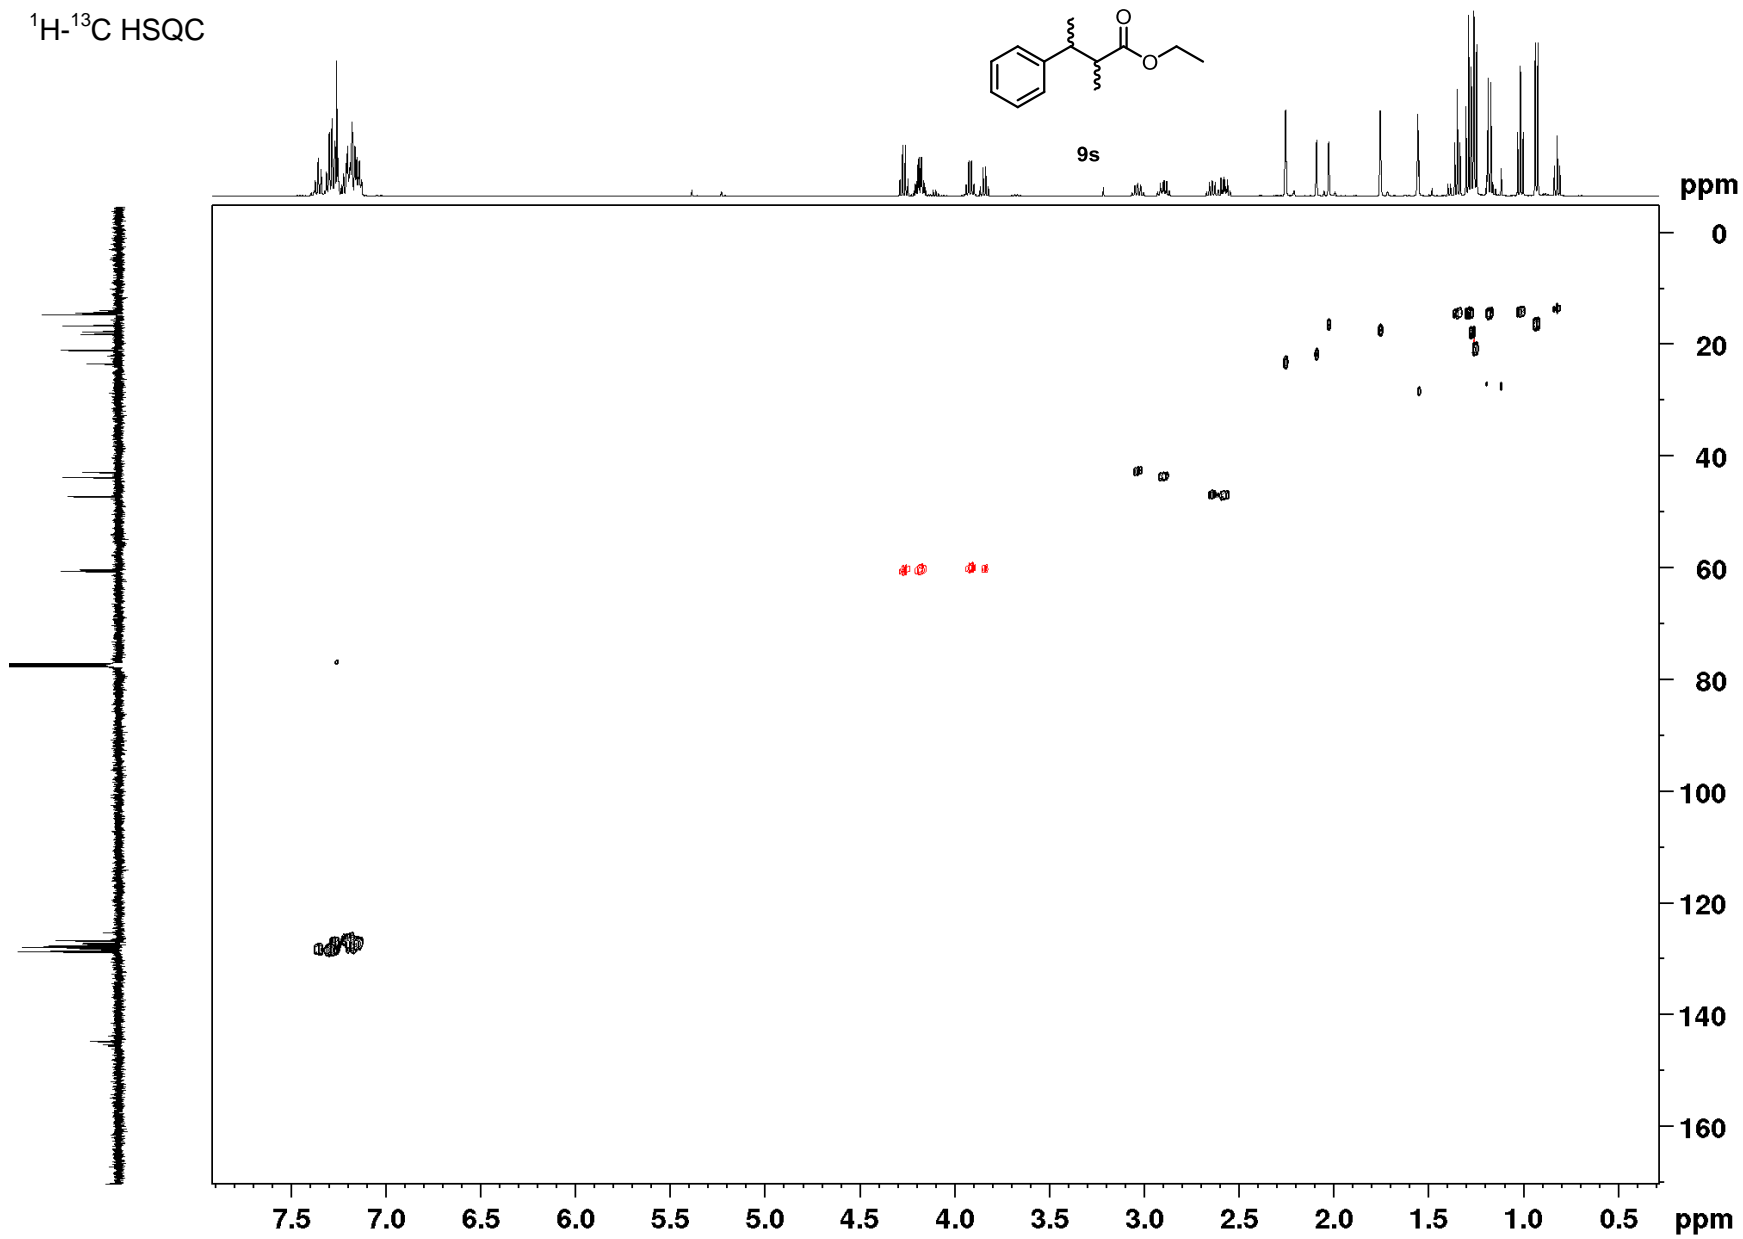

S255

$^1\text{H}$ - $^{13}\text{C}$  HMBC

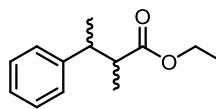

9s

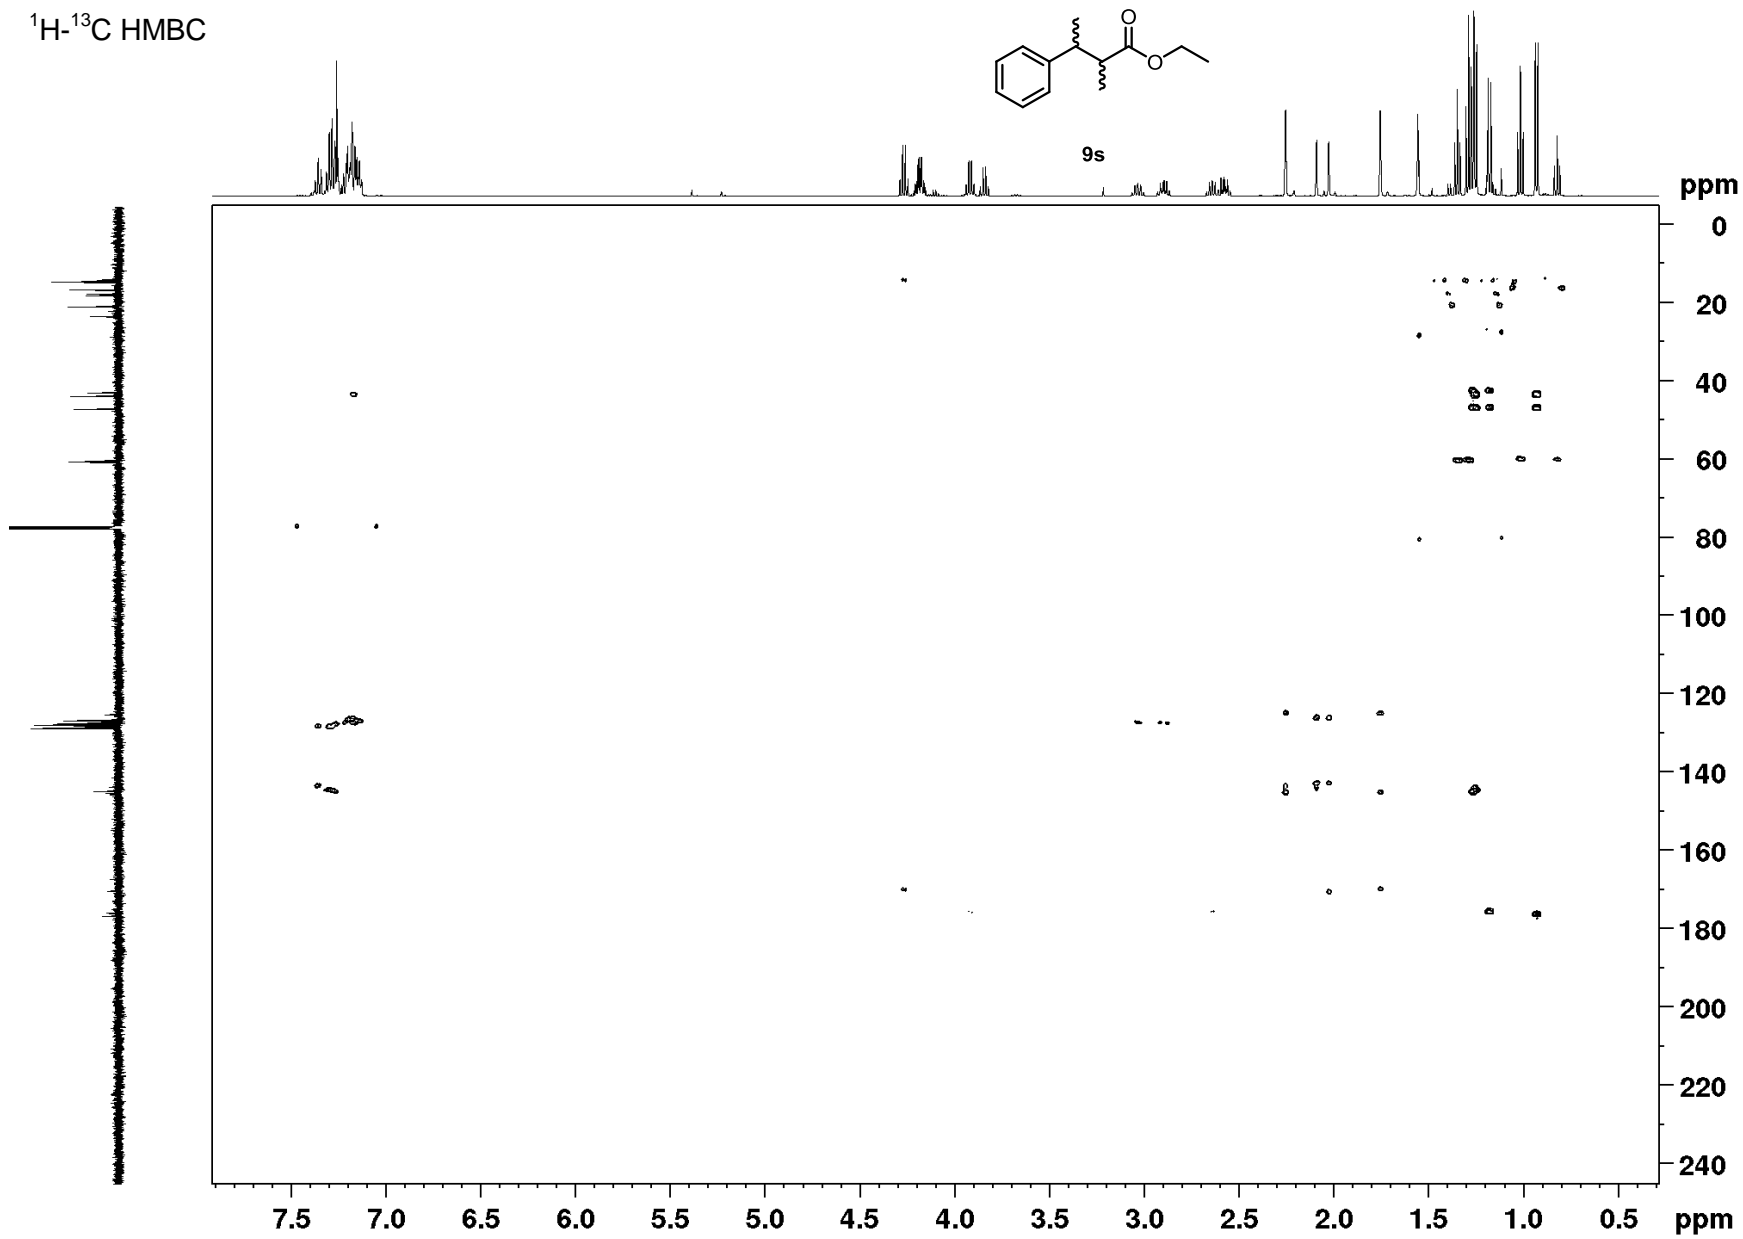

$^1\text{H}$ - $^1\text{H}$  NOESY

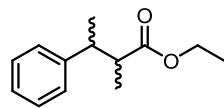

9s

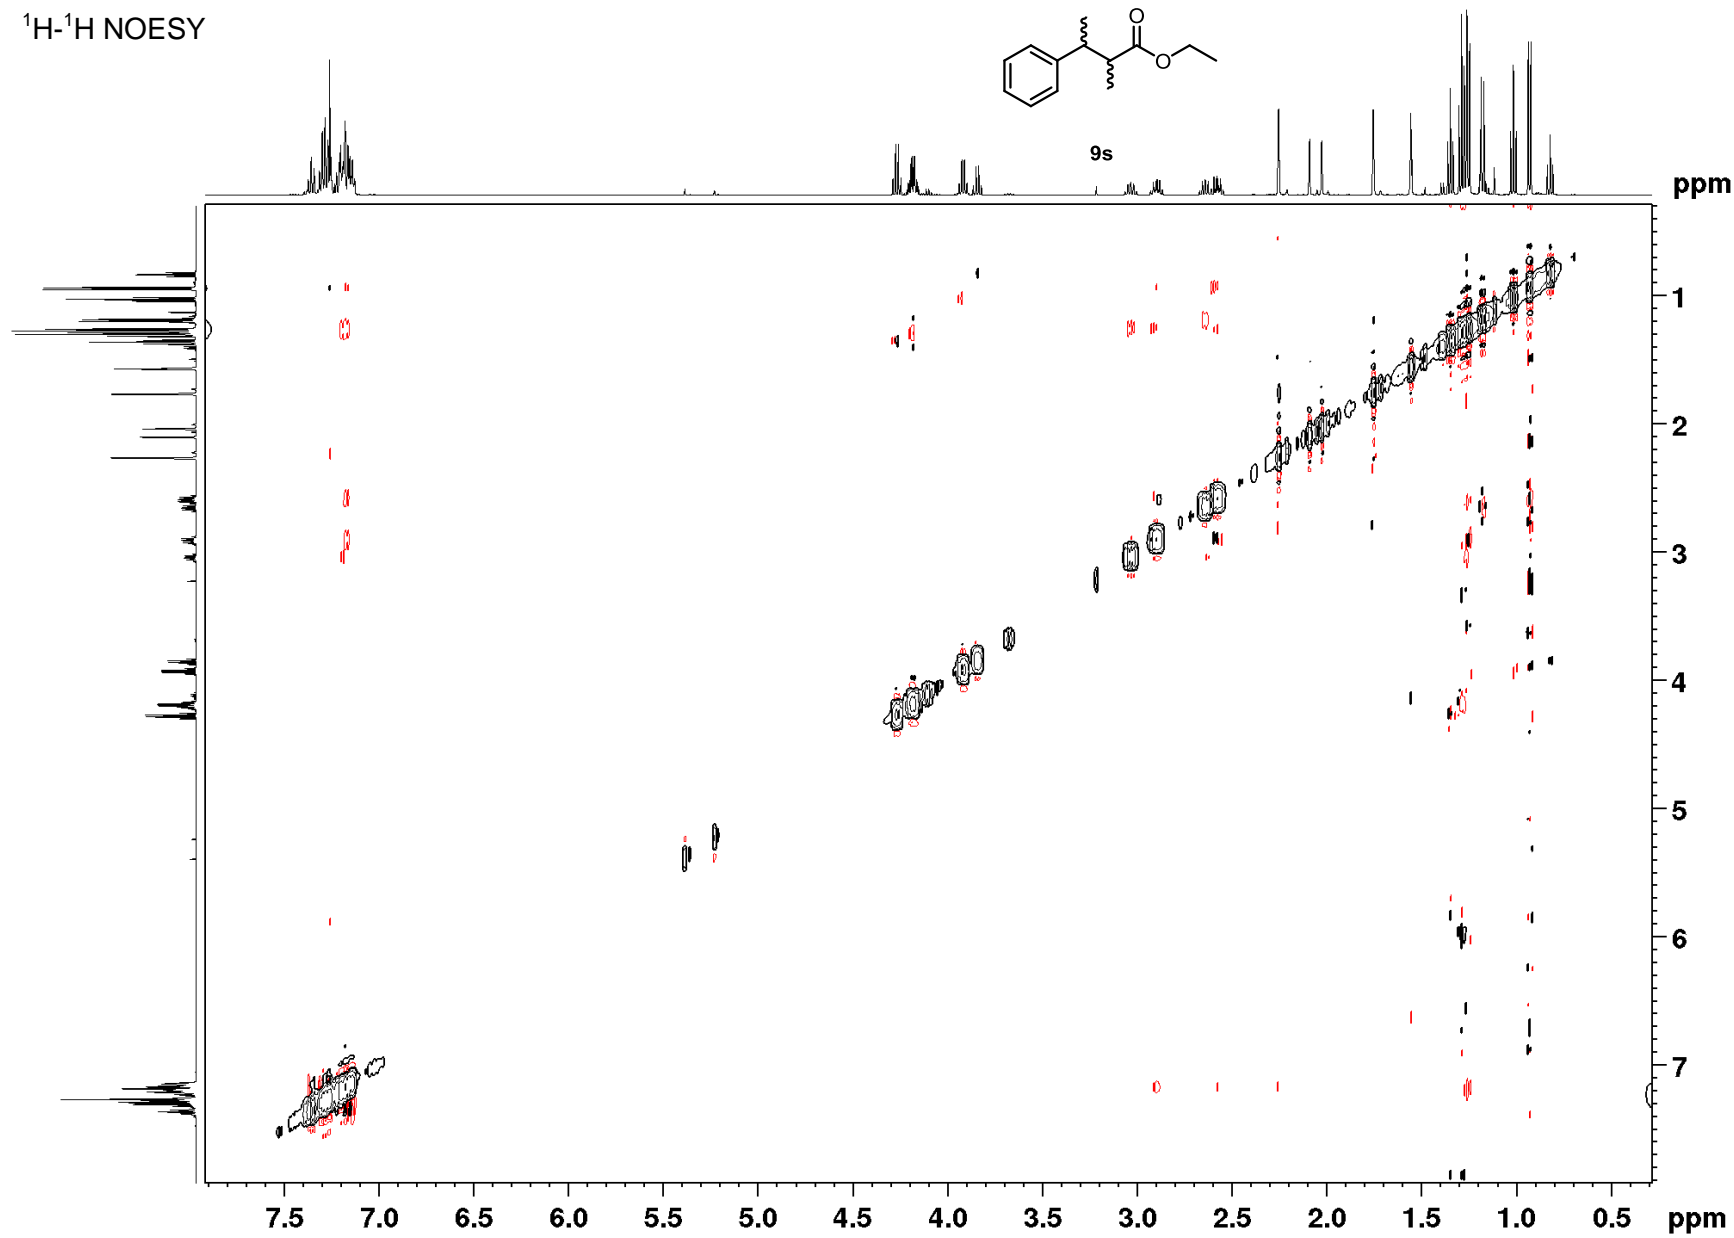

Ethyl 3-cyclohexylbutanoate (9t)

<sup>1</sup>H NMR

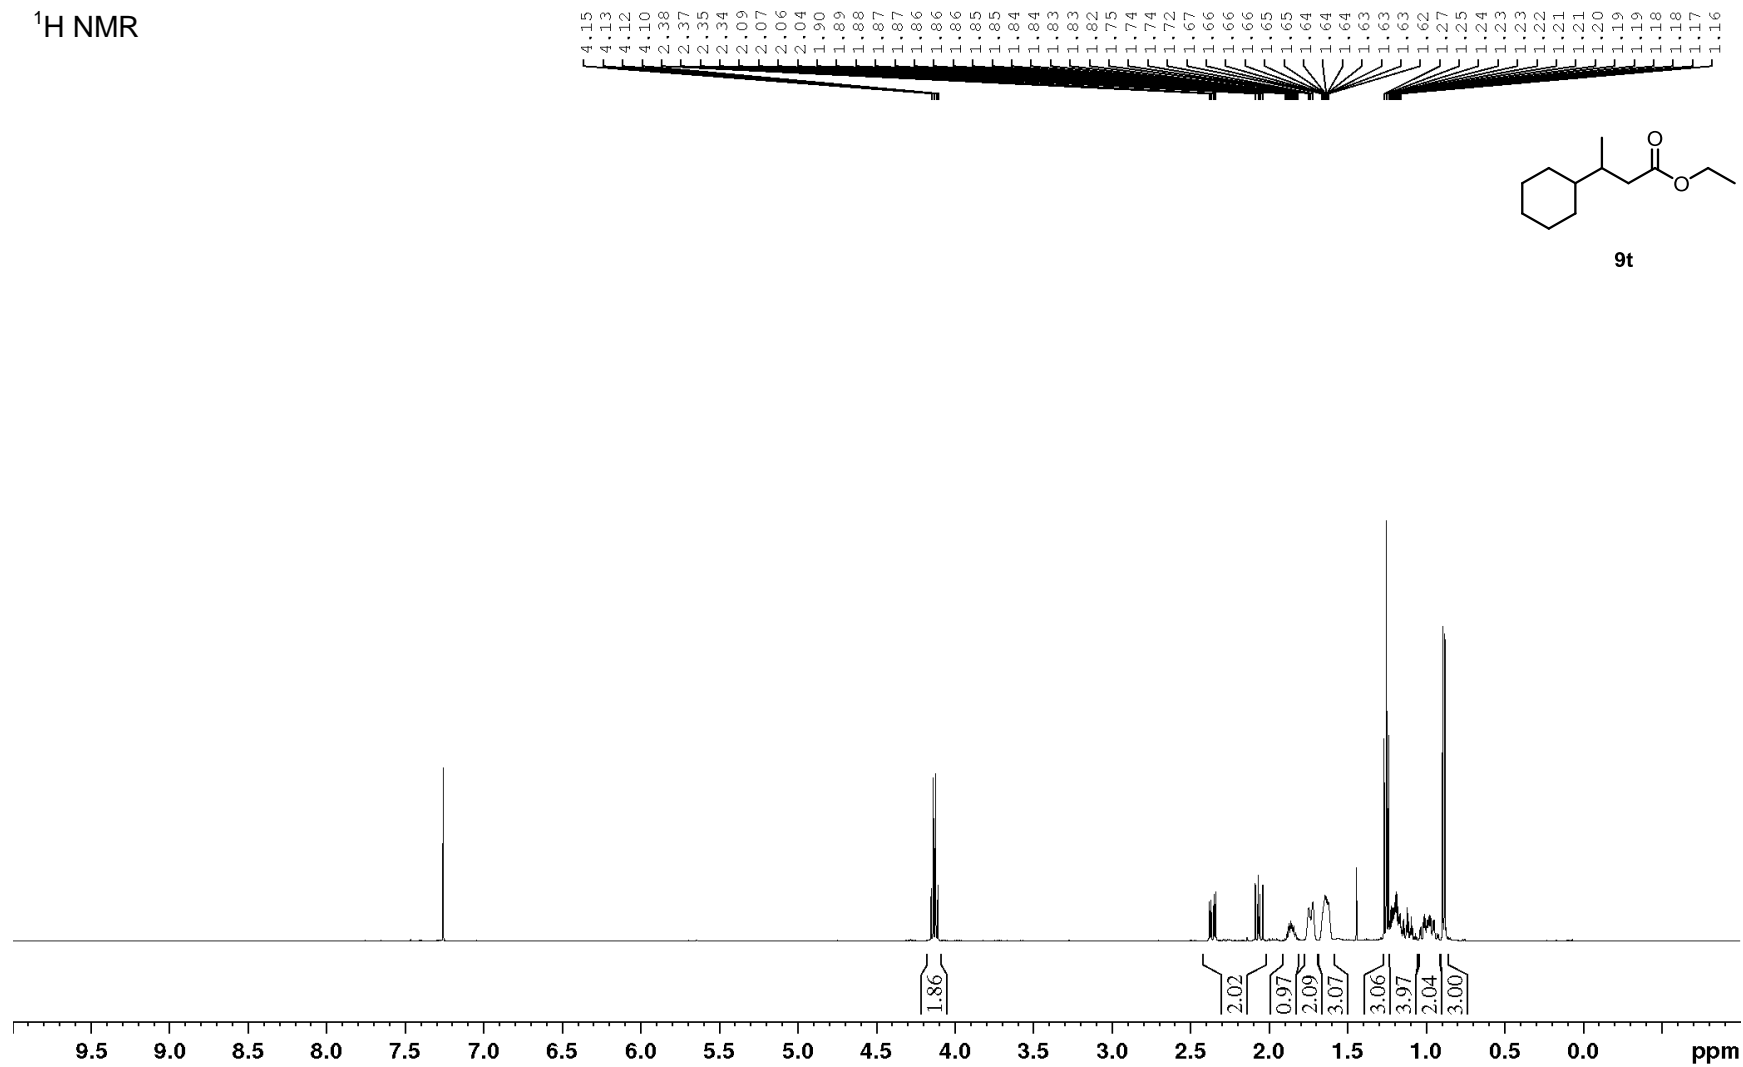

<sup>13</sup>C NMR

174.0

60.2

42.8

39.5

35.6

30.5

29.1

26.9

26.8

26.8

16.6

14.4

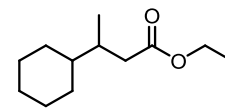

9t

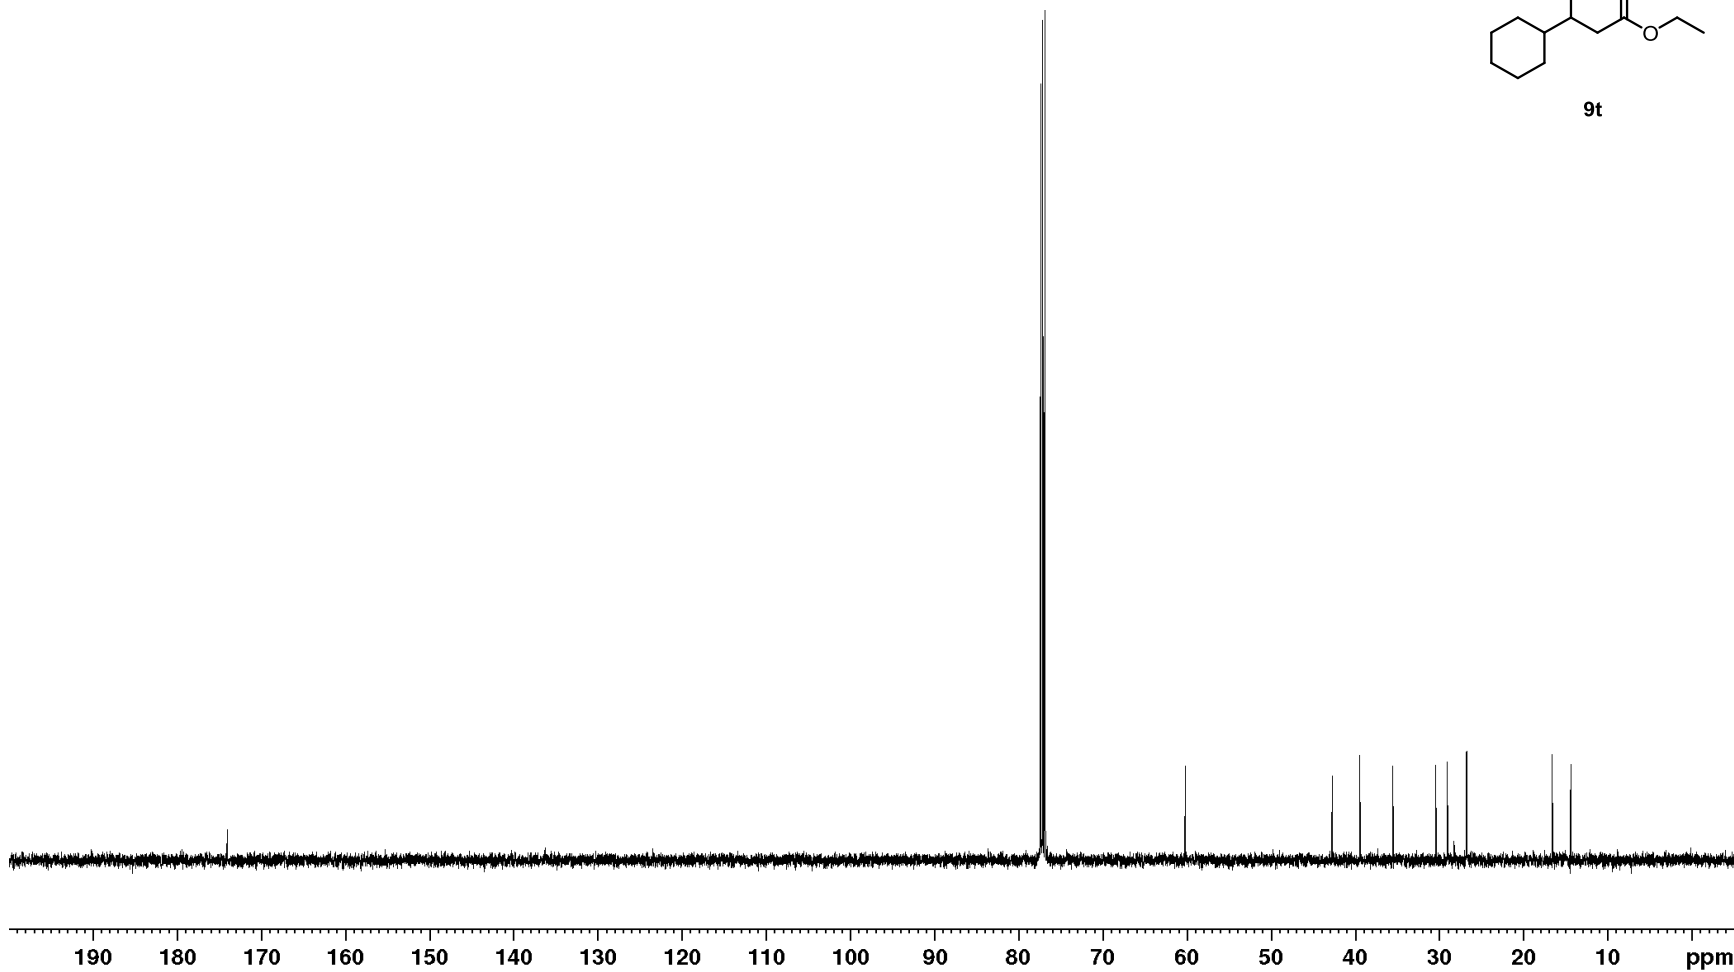

<sup>13</sup>C DEPT NMR

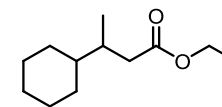

9t

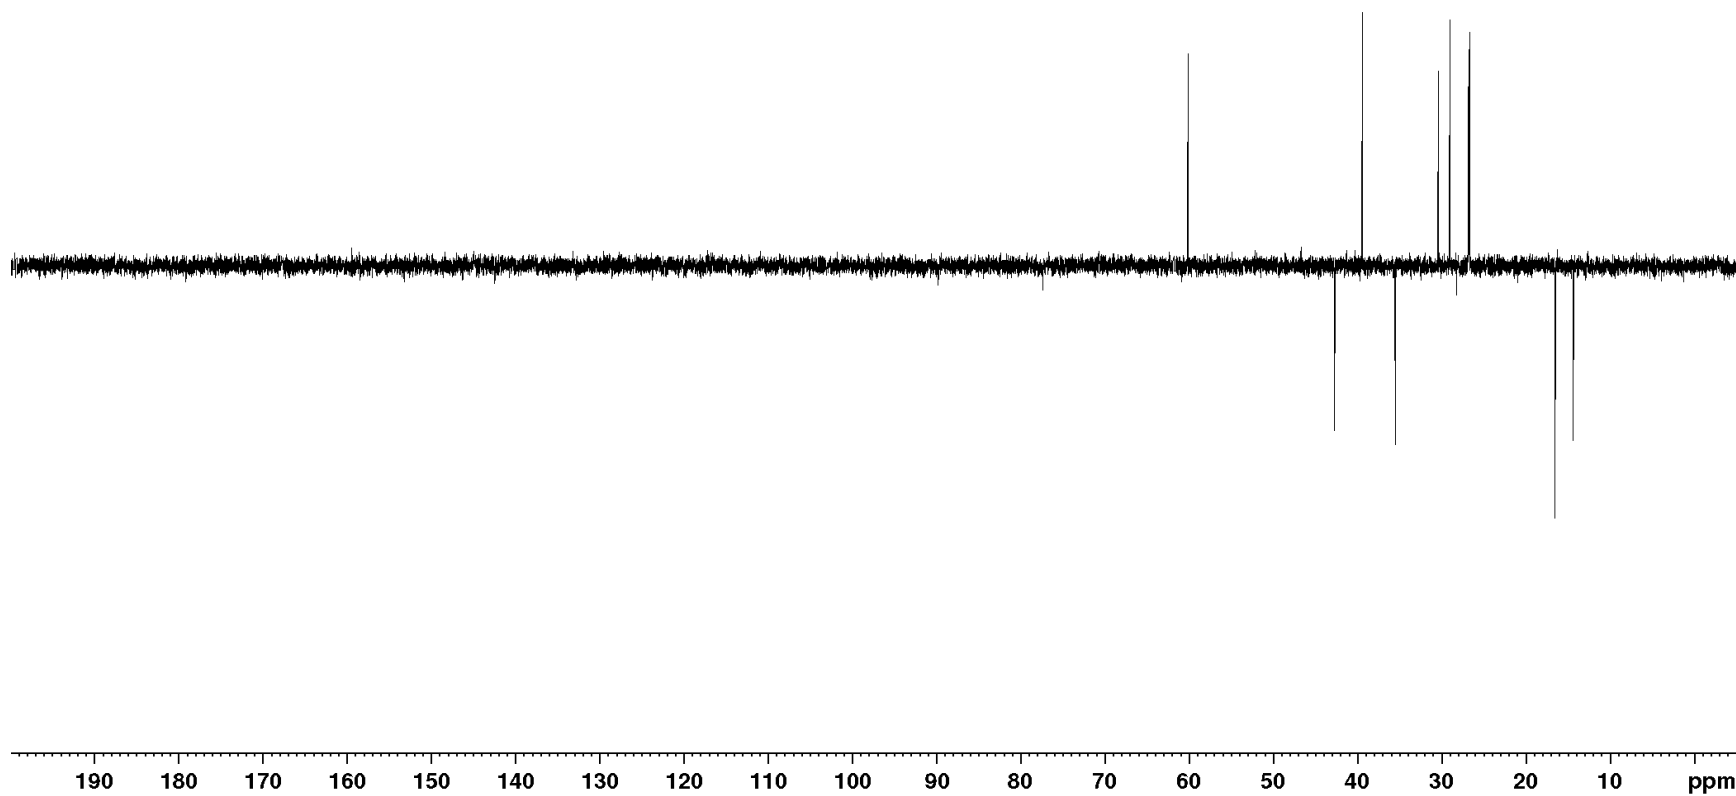



$^1\text{H}$ - $^1\text{H}$  COSY

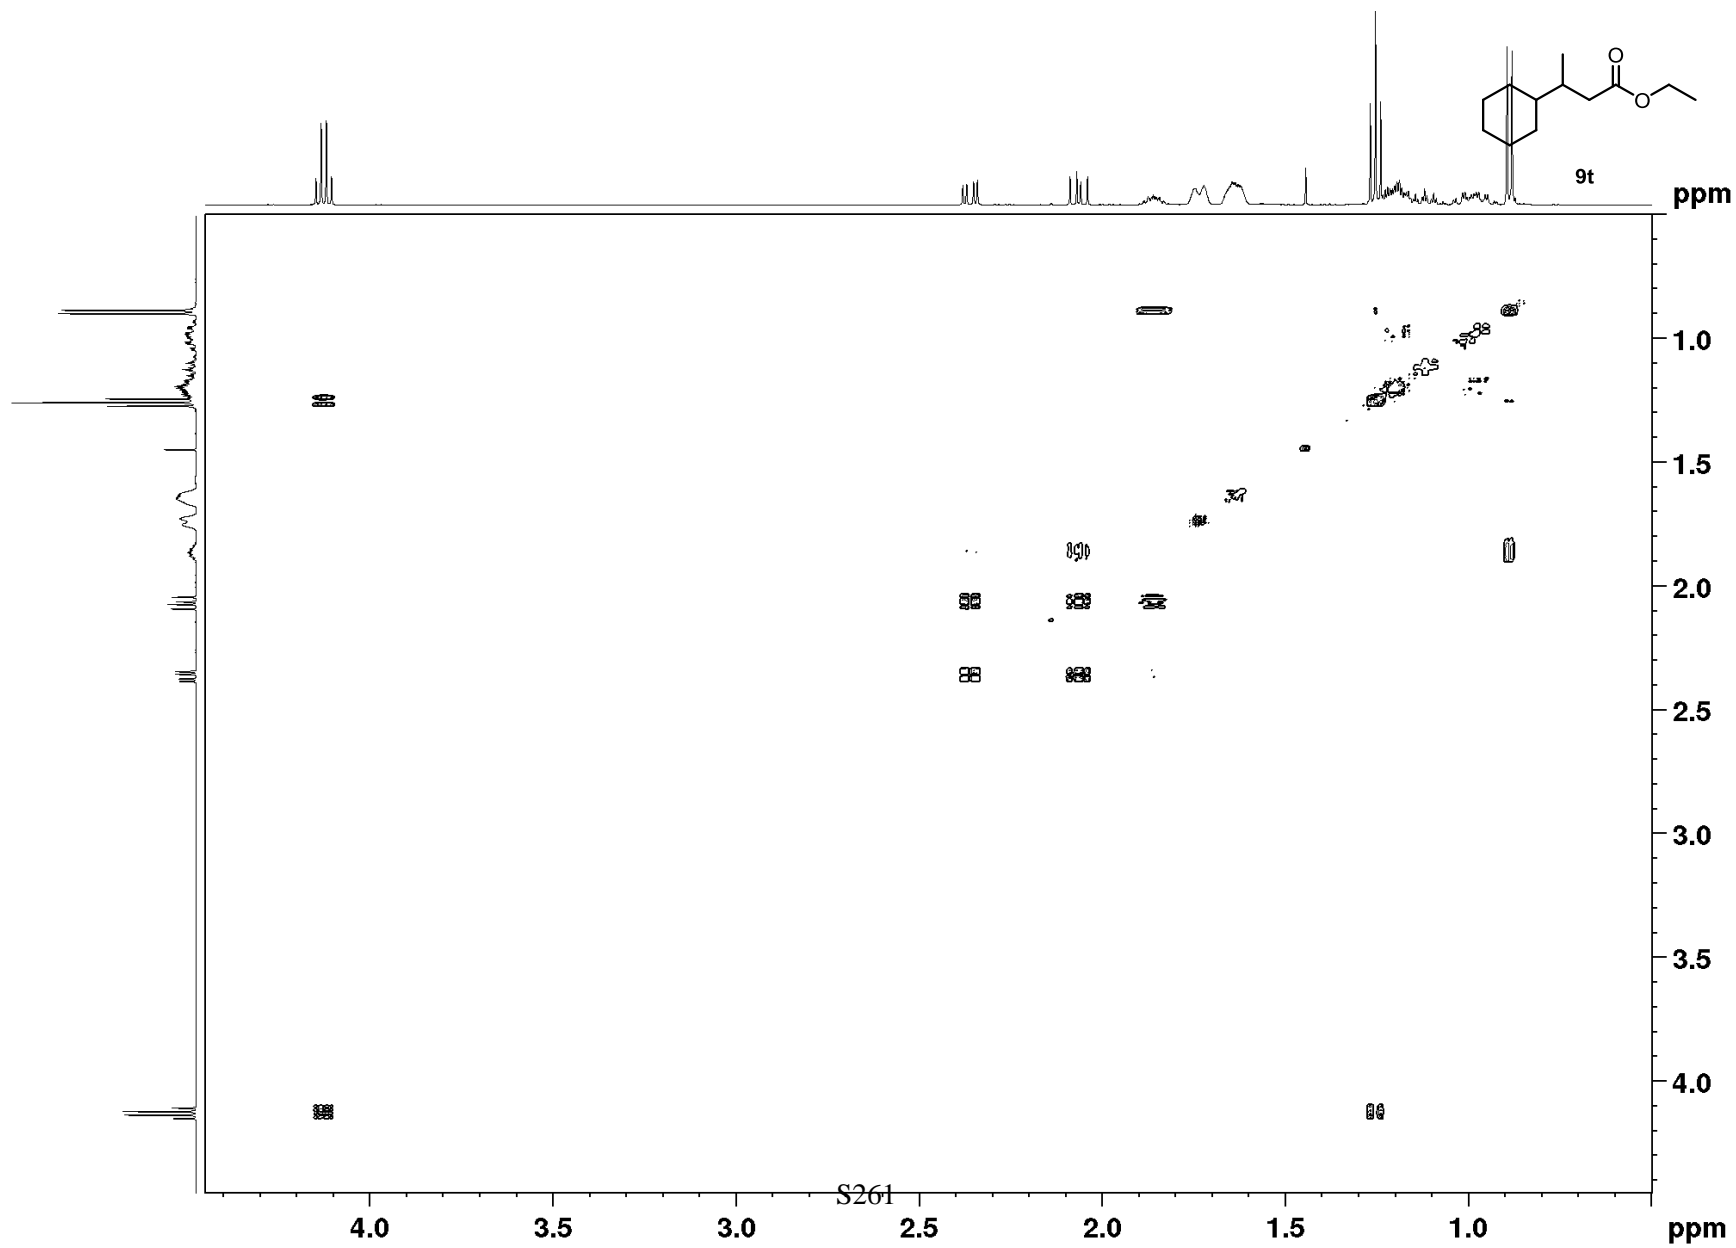

$^1\text{H}$ - $^{13}\text{C}$  HMQC

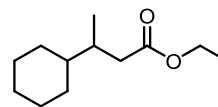

9t

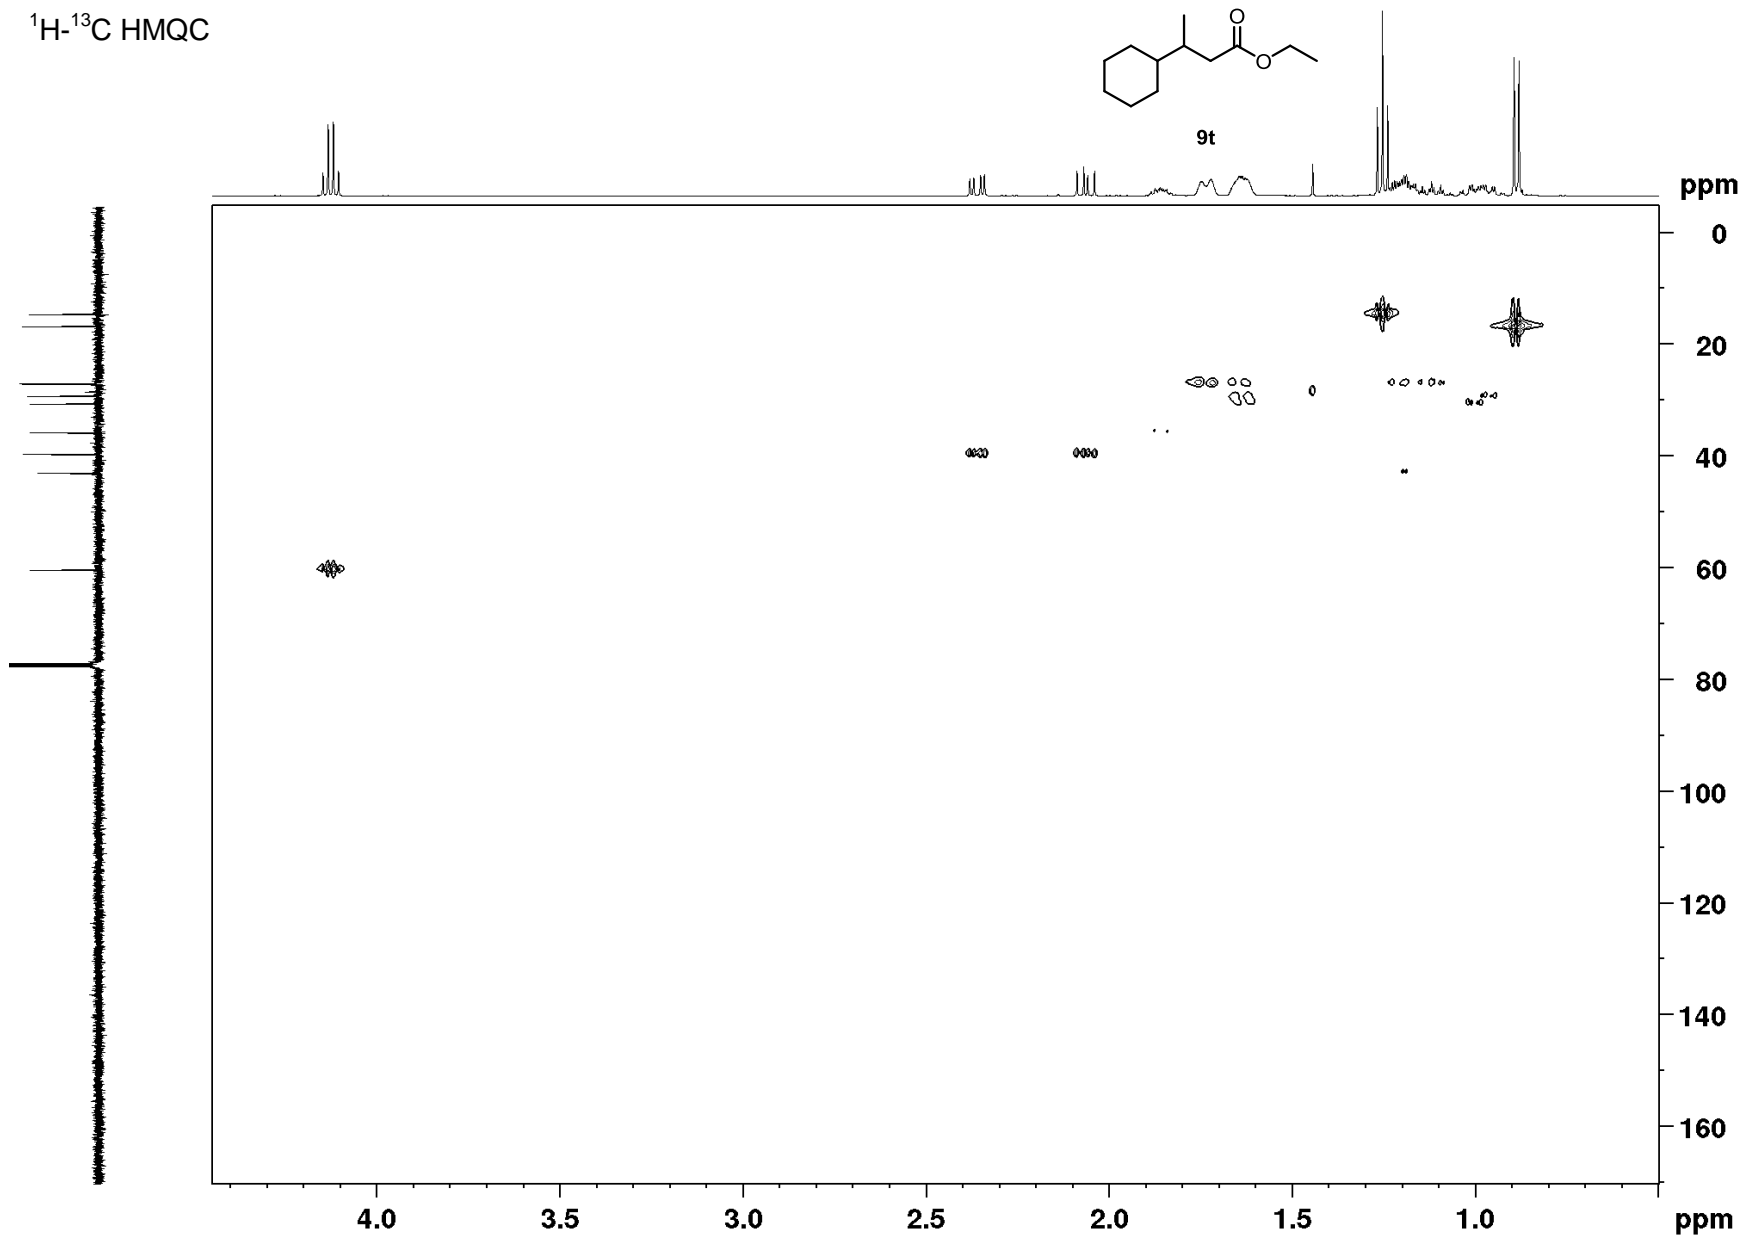

$^1\text{H}$ - $^{13}\text{C}$  HMBC

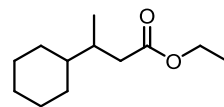

9t

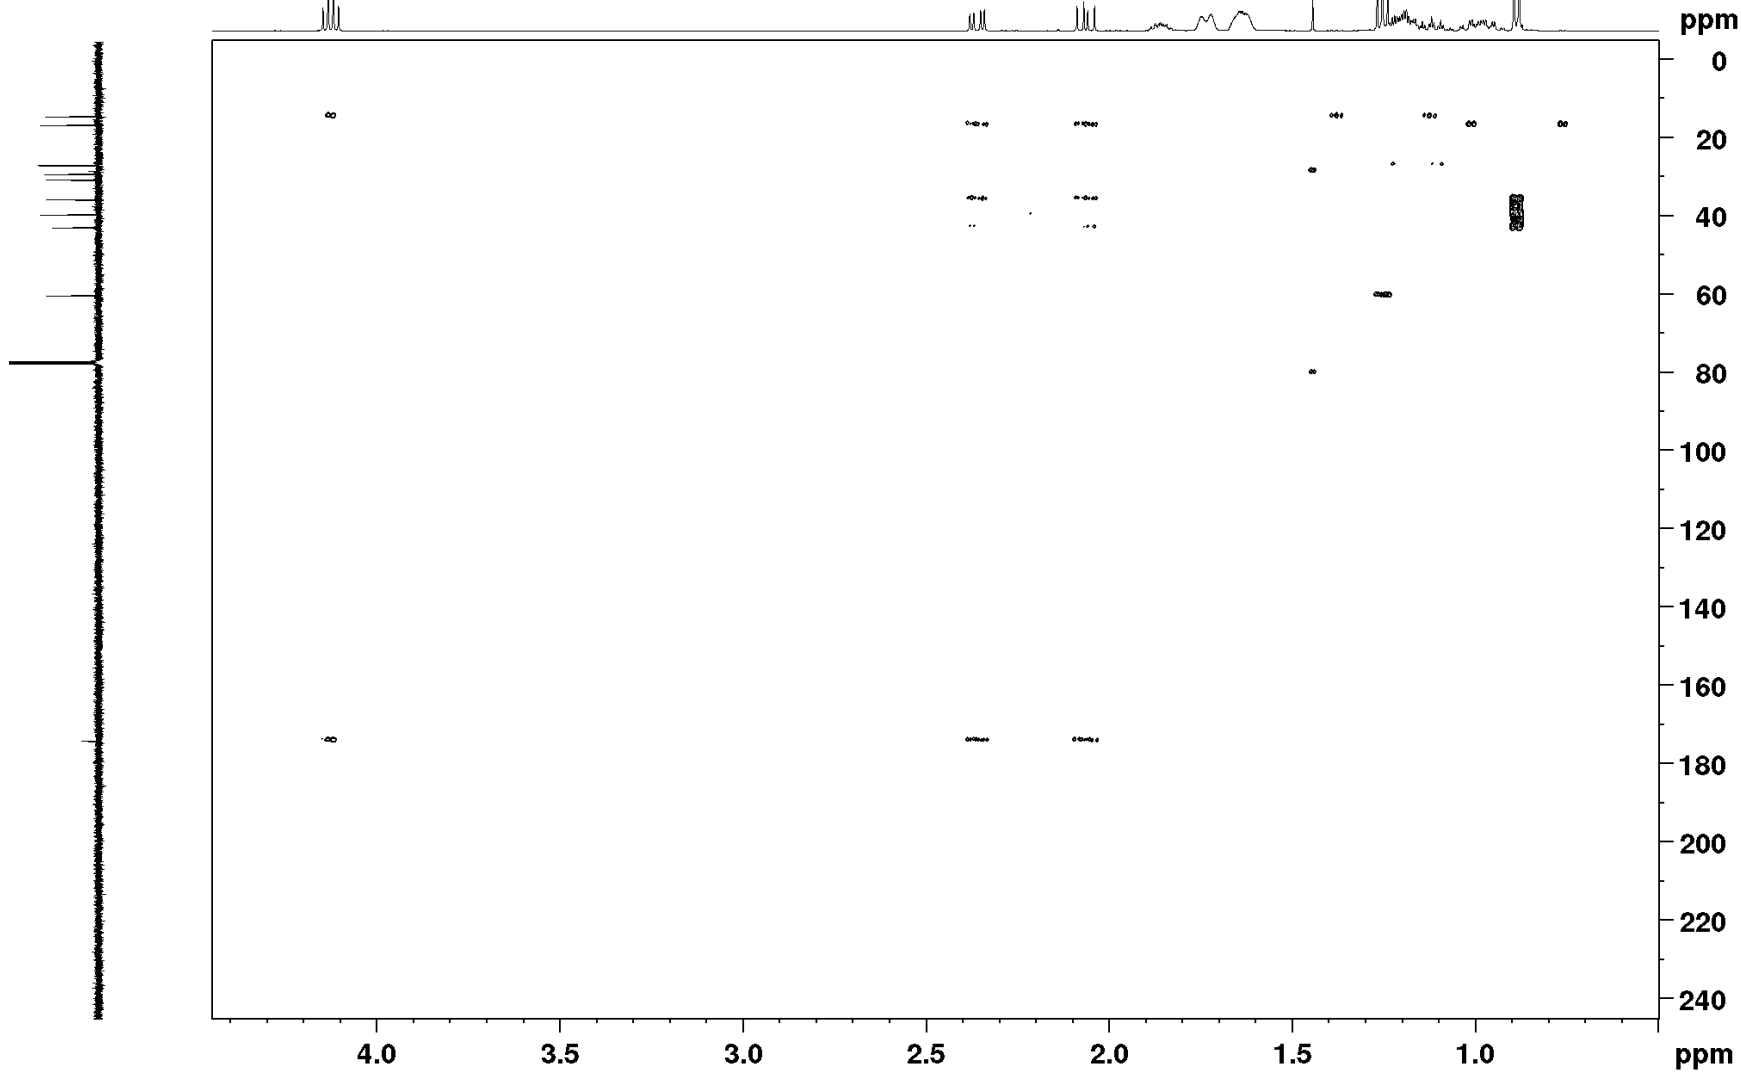

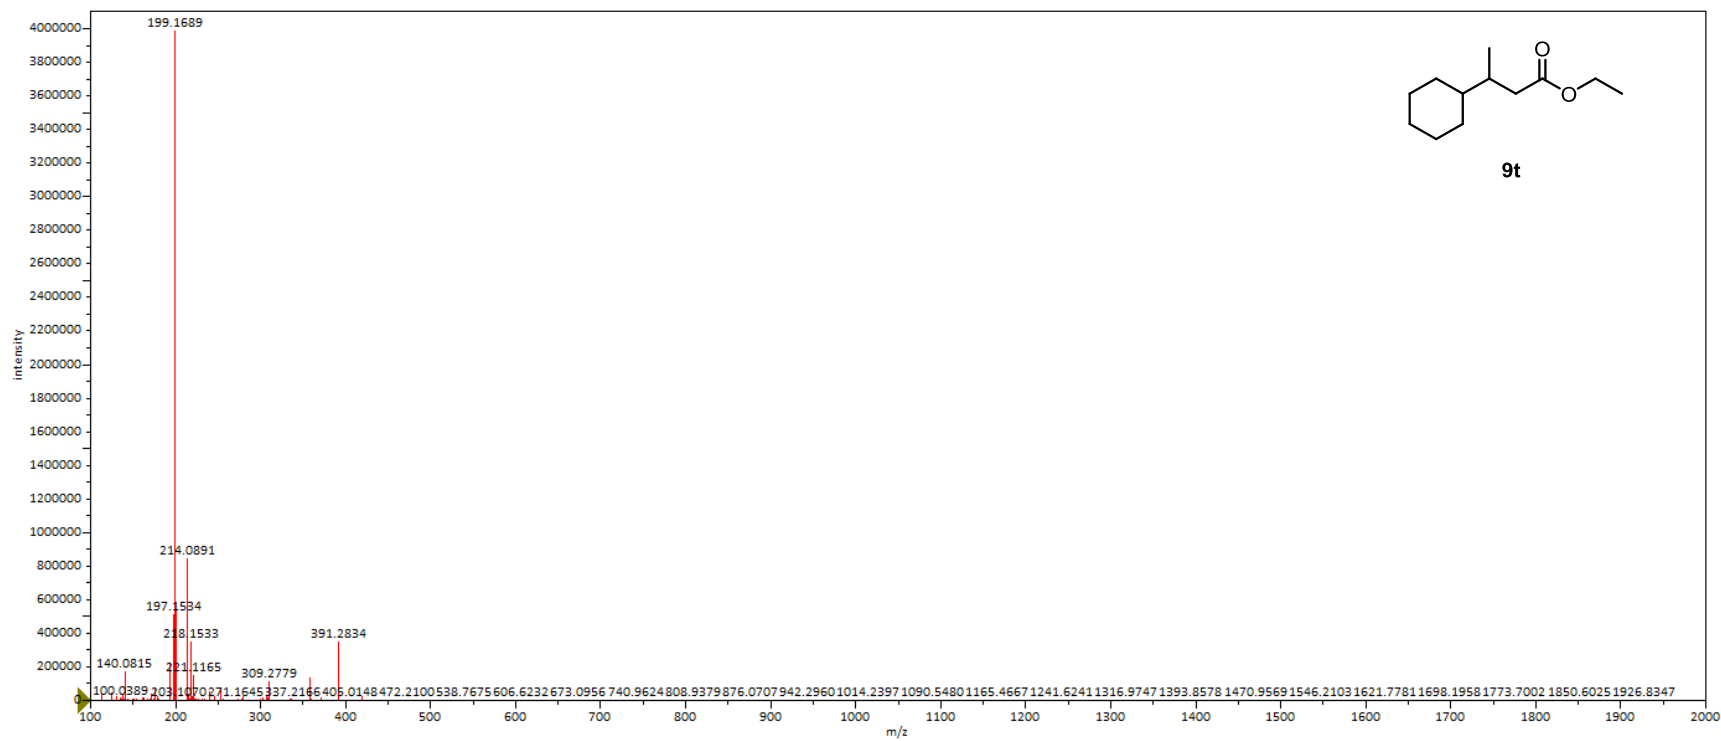

# Ethyl 3-methylundecanoate (9u)

<sup>1</sup>H NMR

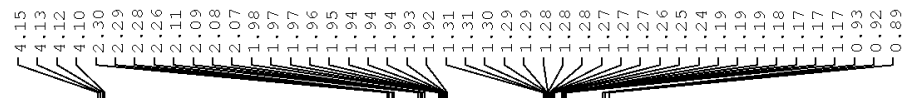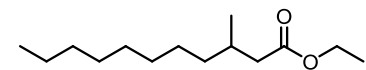

9u

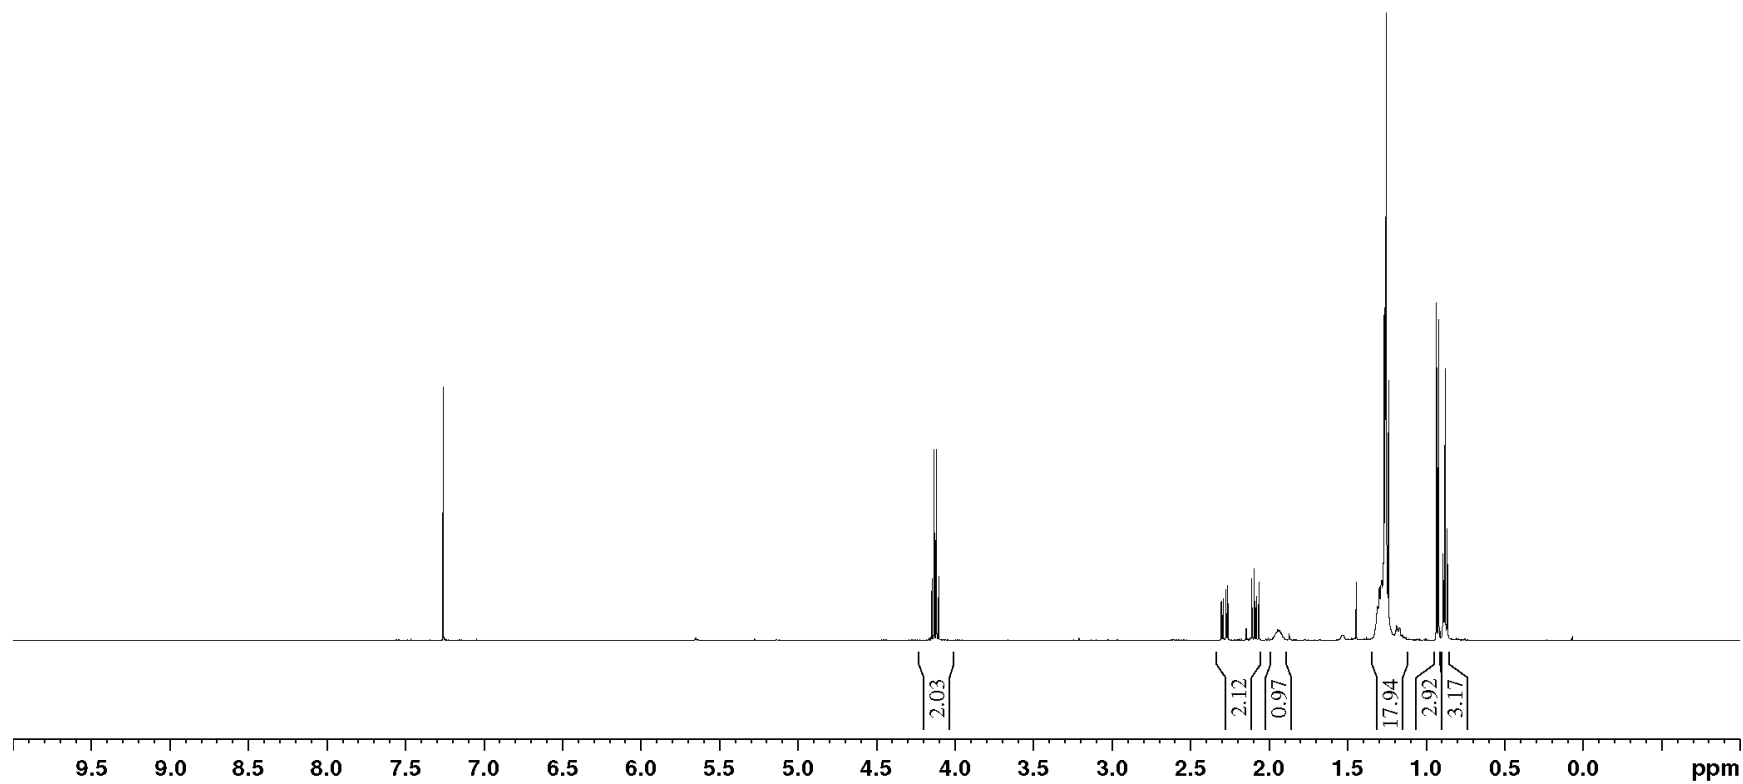

<sup>13</sup>C NMR

173.6

60.2

42.1  
36.9  
32.0  
30.5  
29.9  
29.7  
29.4  
27.0  
22.8  
19.9  
14.4  
14.2

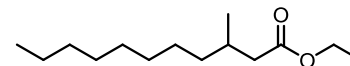

9u

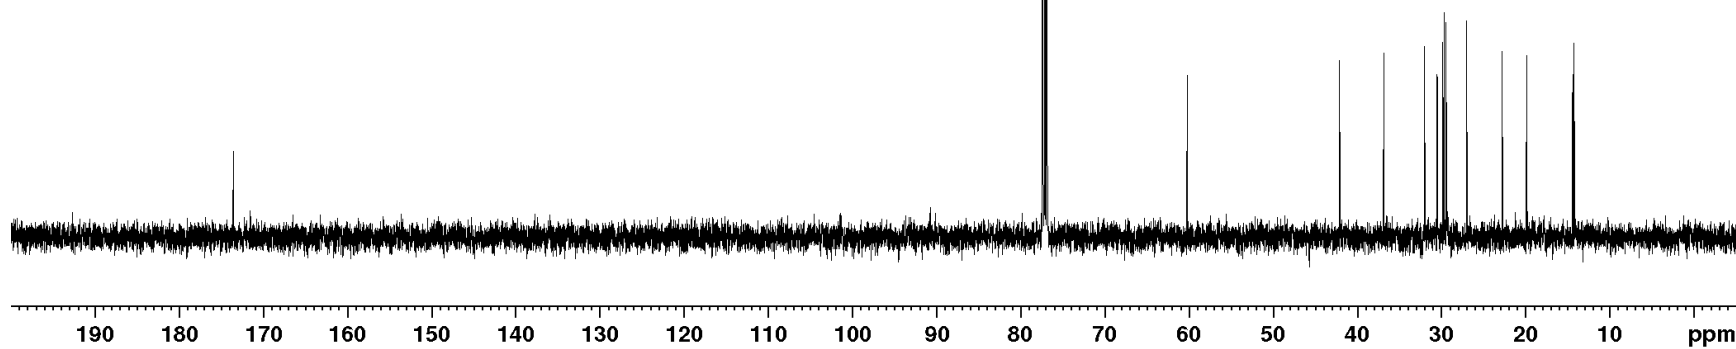

<sup>13</sup>C DEPT NMR

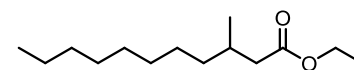

9u

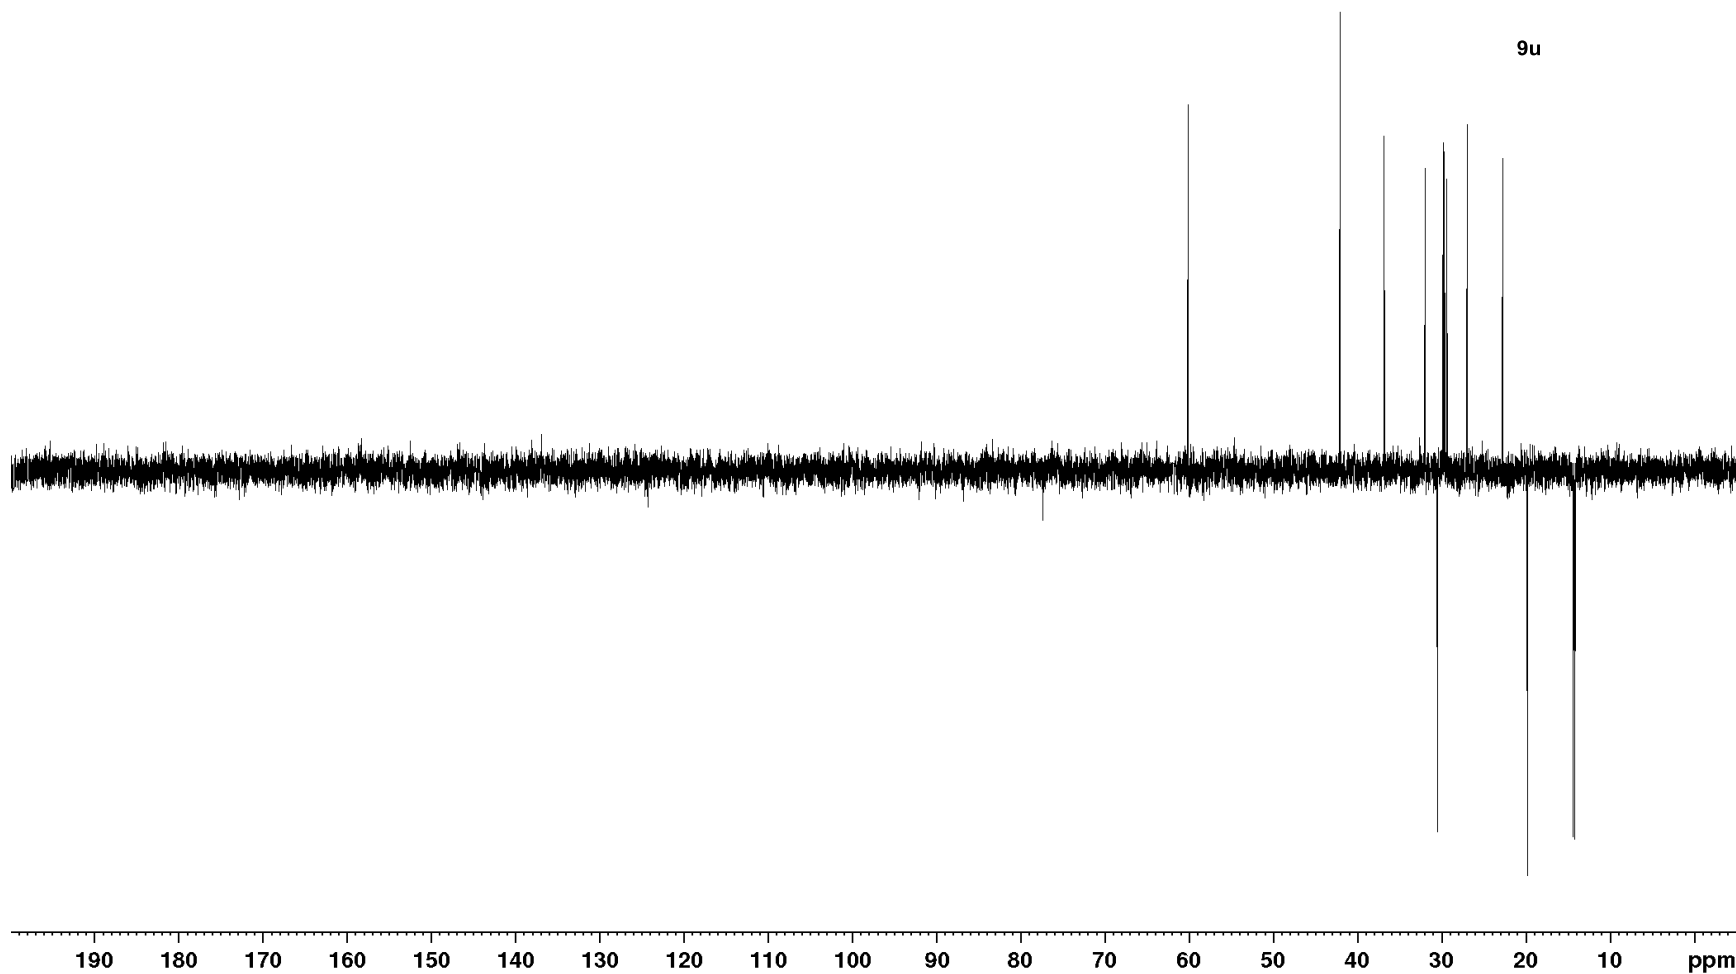

$^1\text{H}$ - $^1\text{H}$  COSY

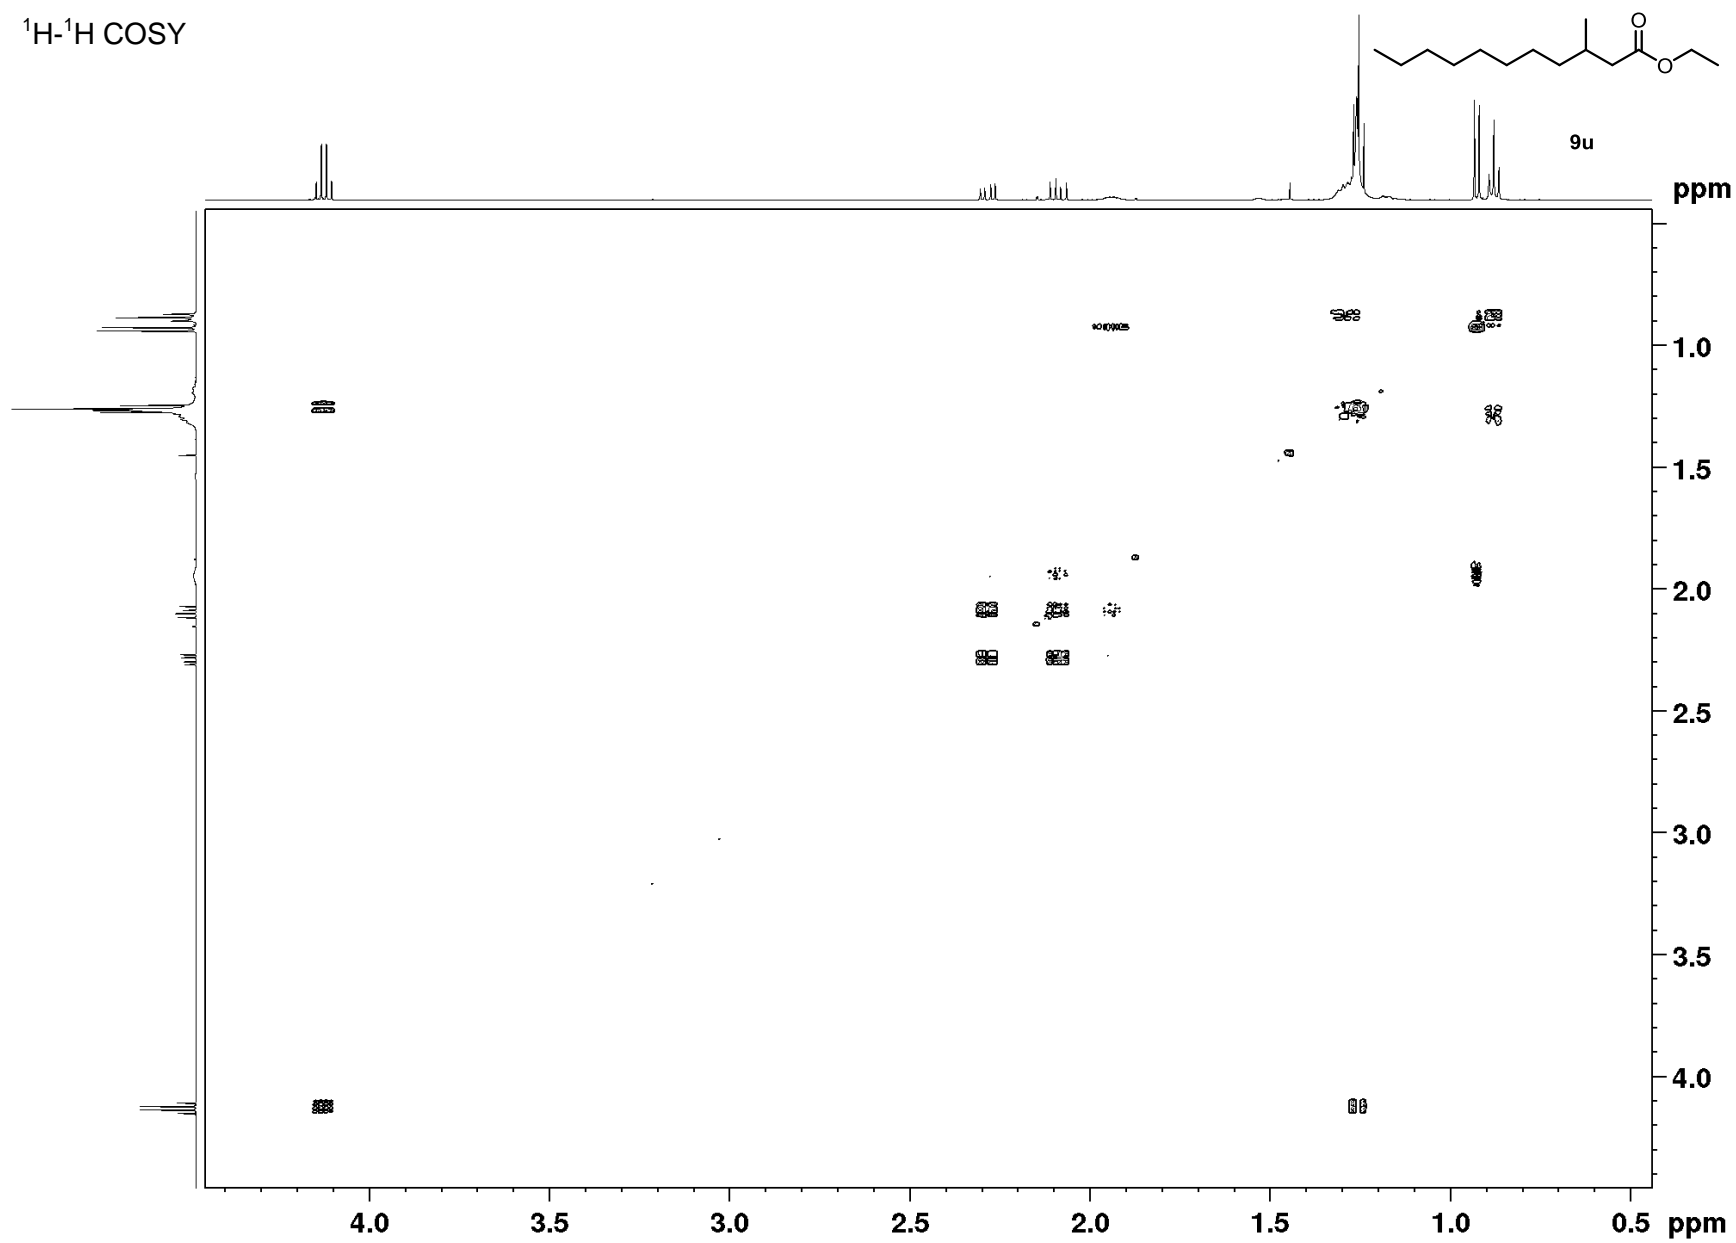

S268



$^1\text{H}$ - $^{13}\text{C}$  HMQC

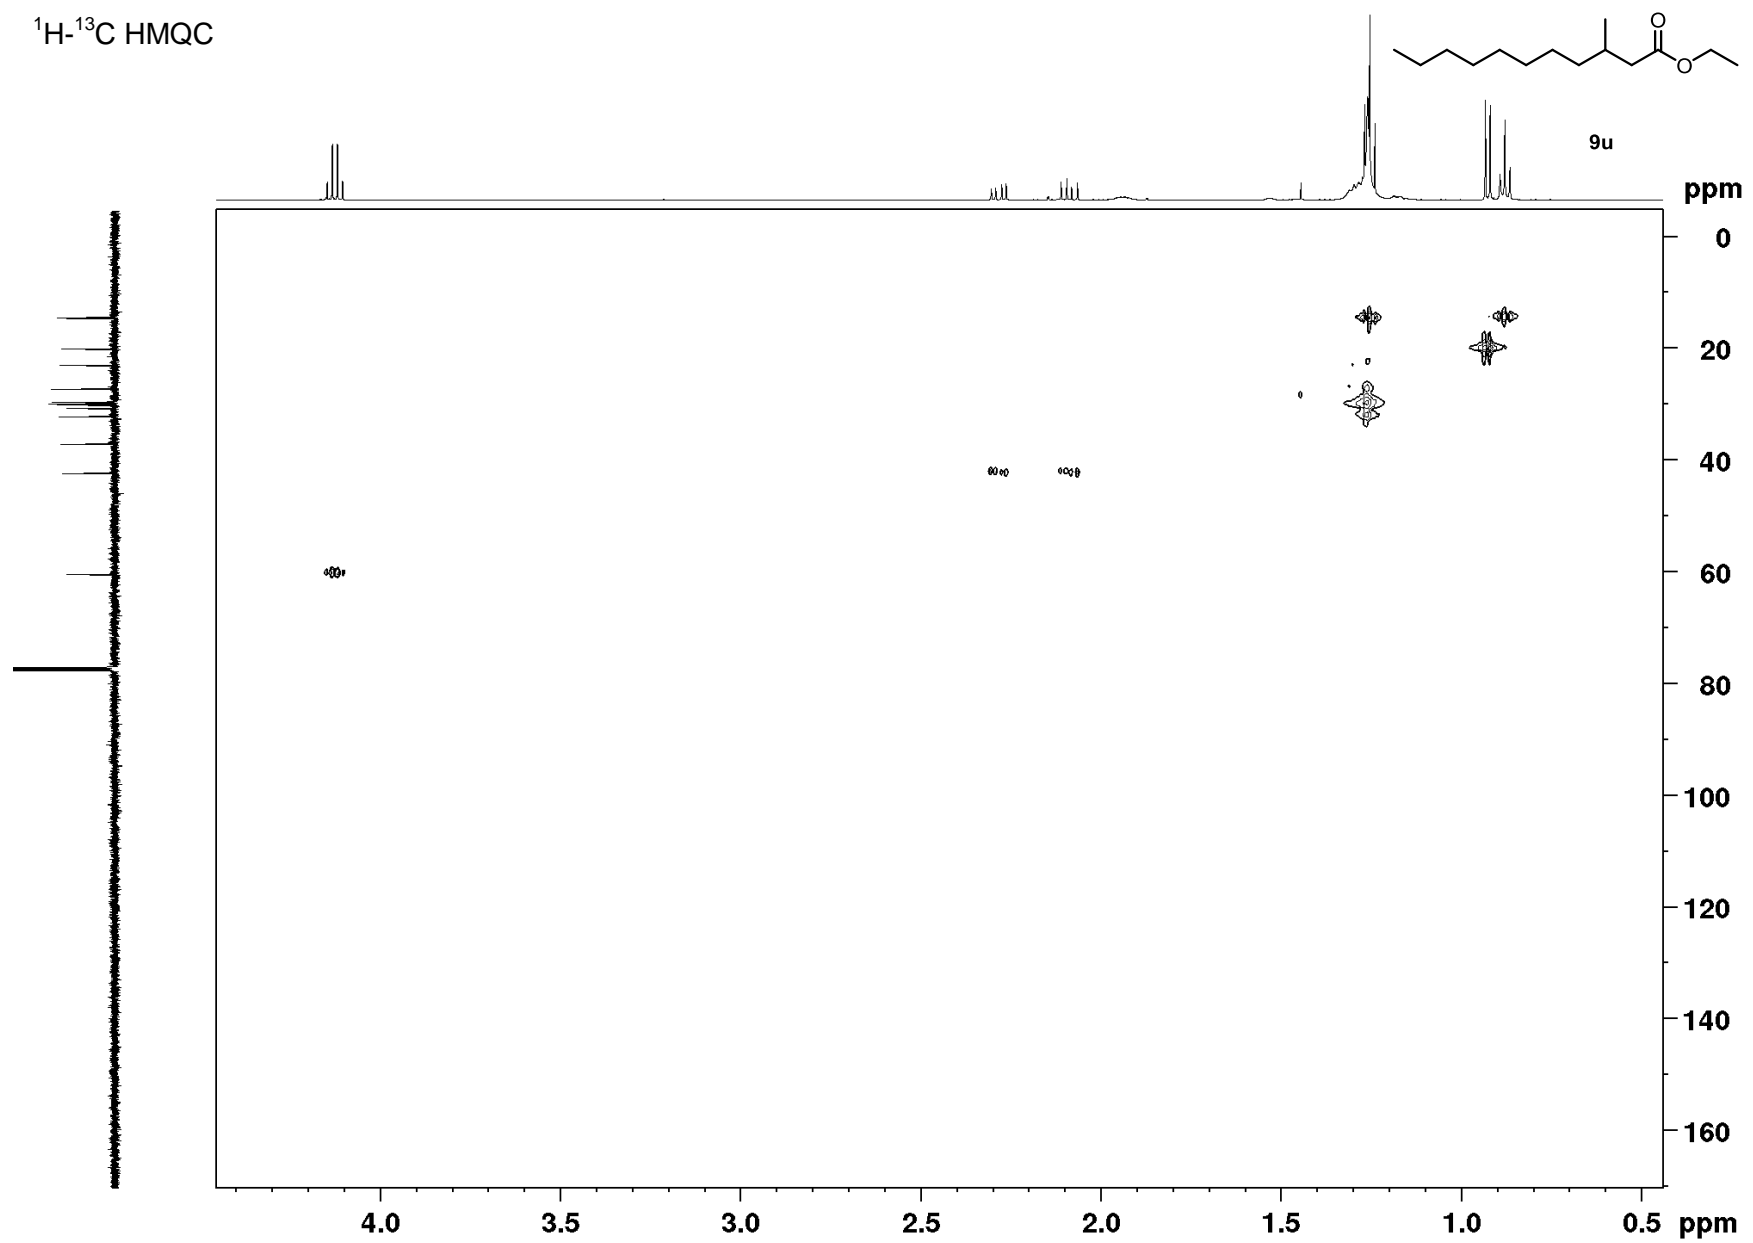

$^1\text{H}$ - $^{13}\text{C}$  HMBC

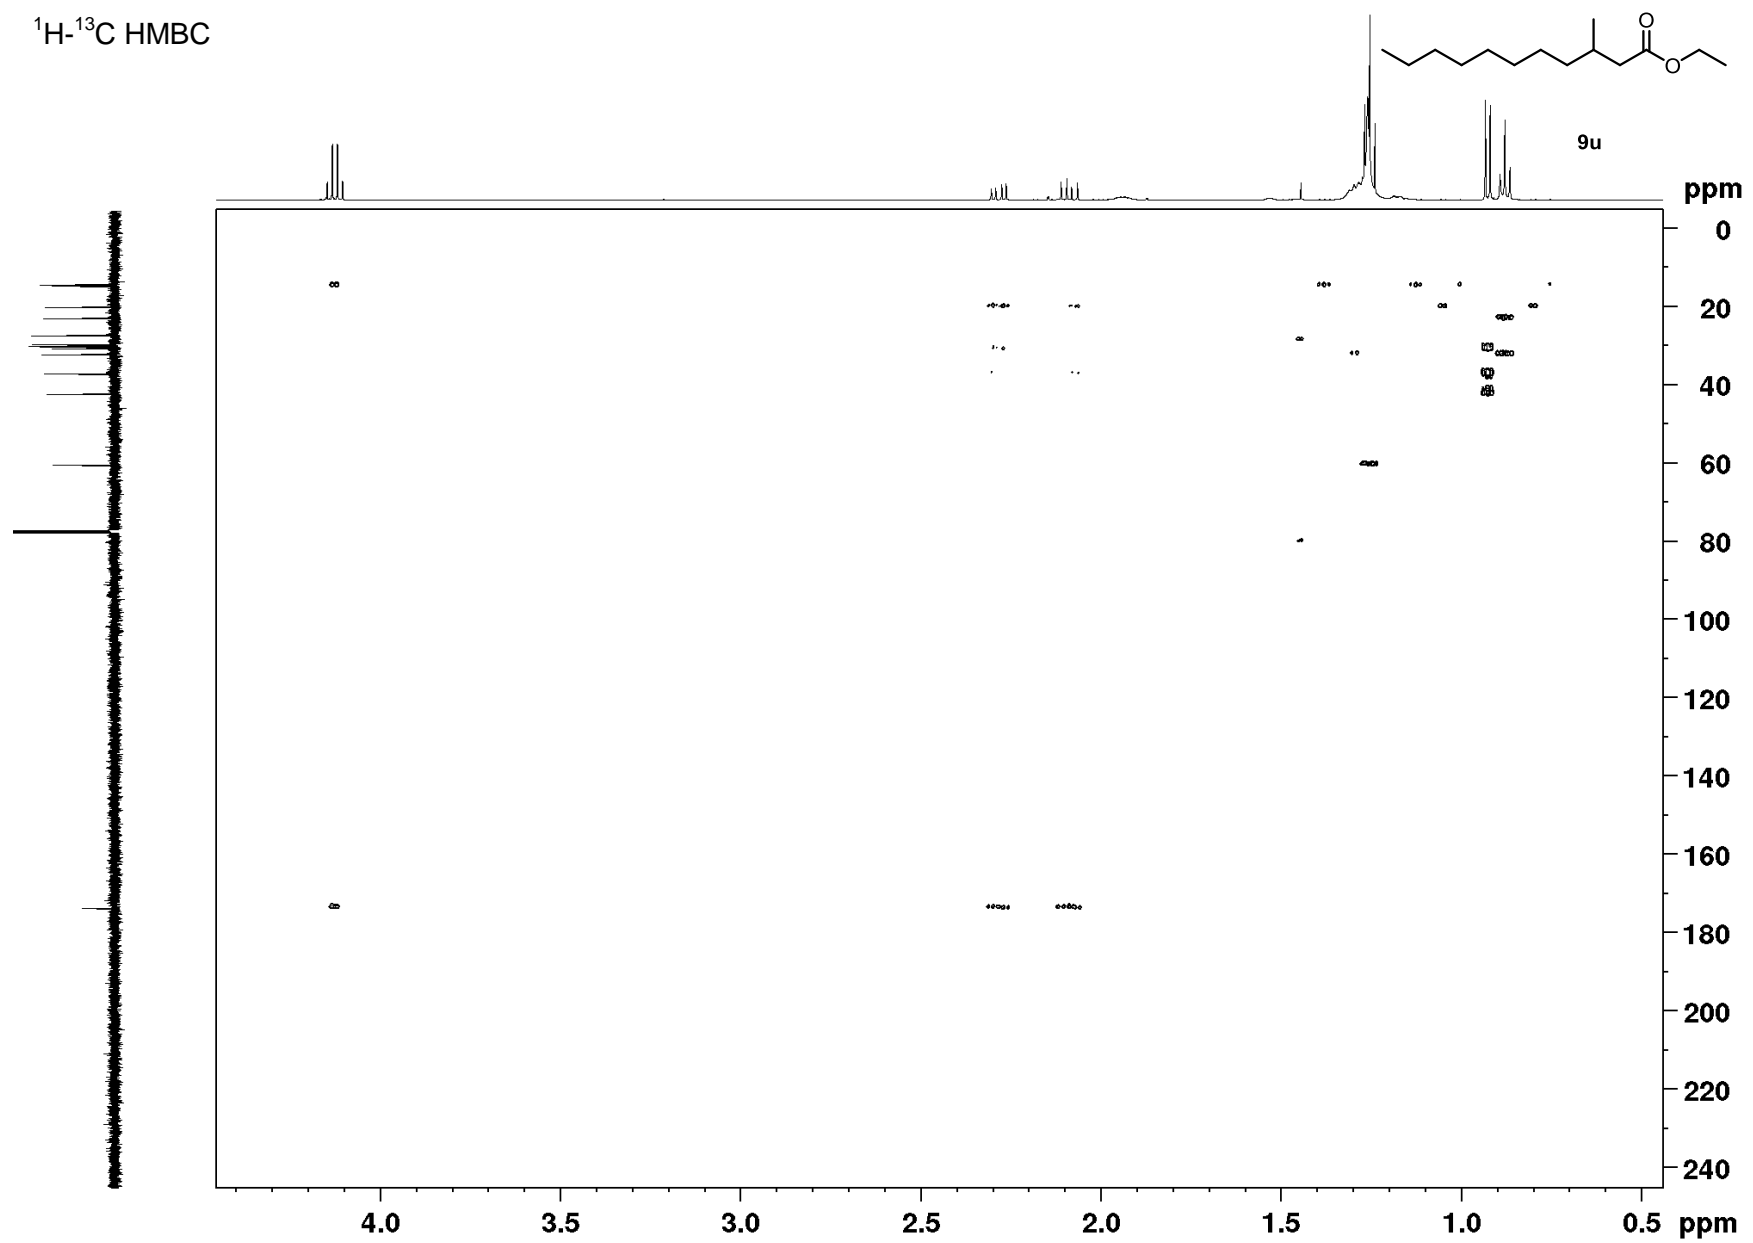

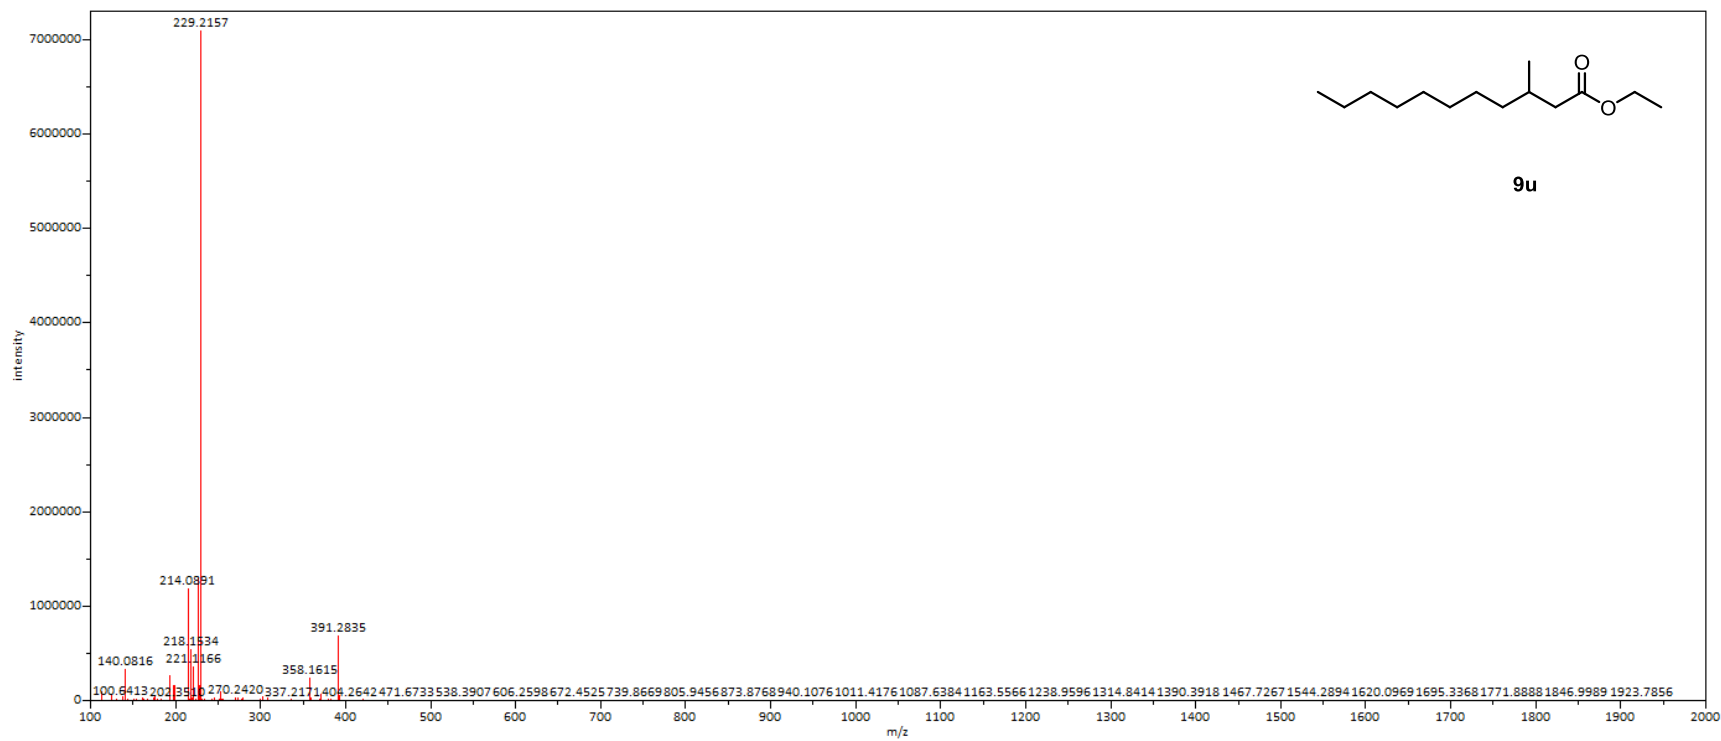

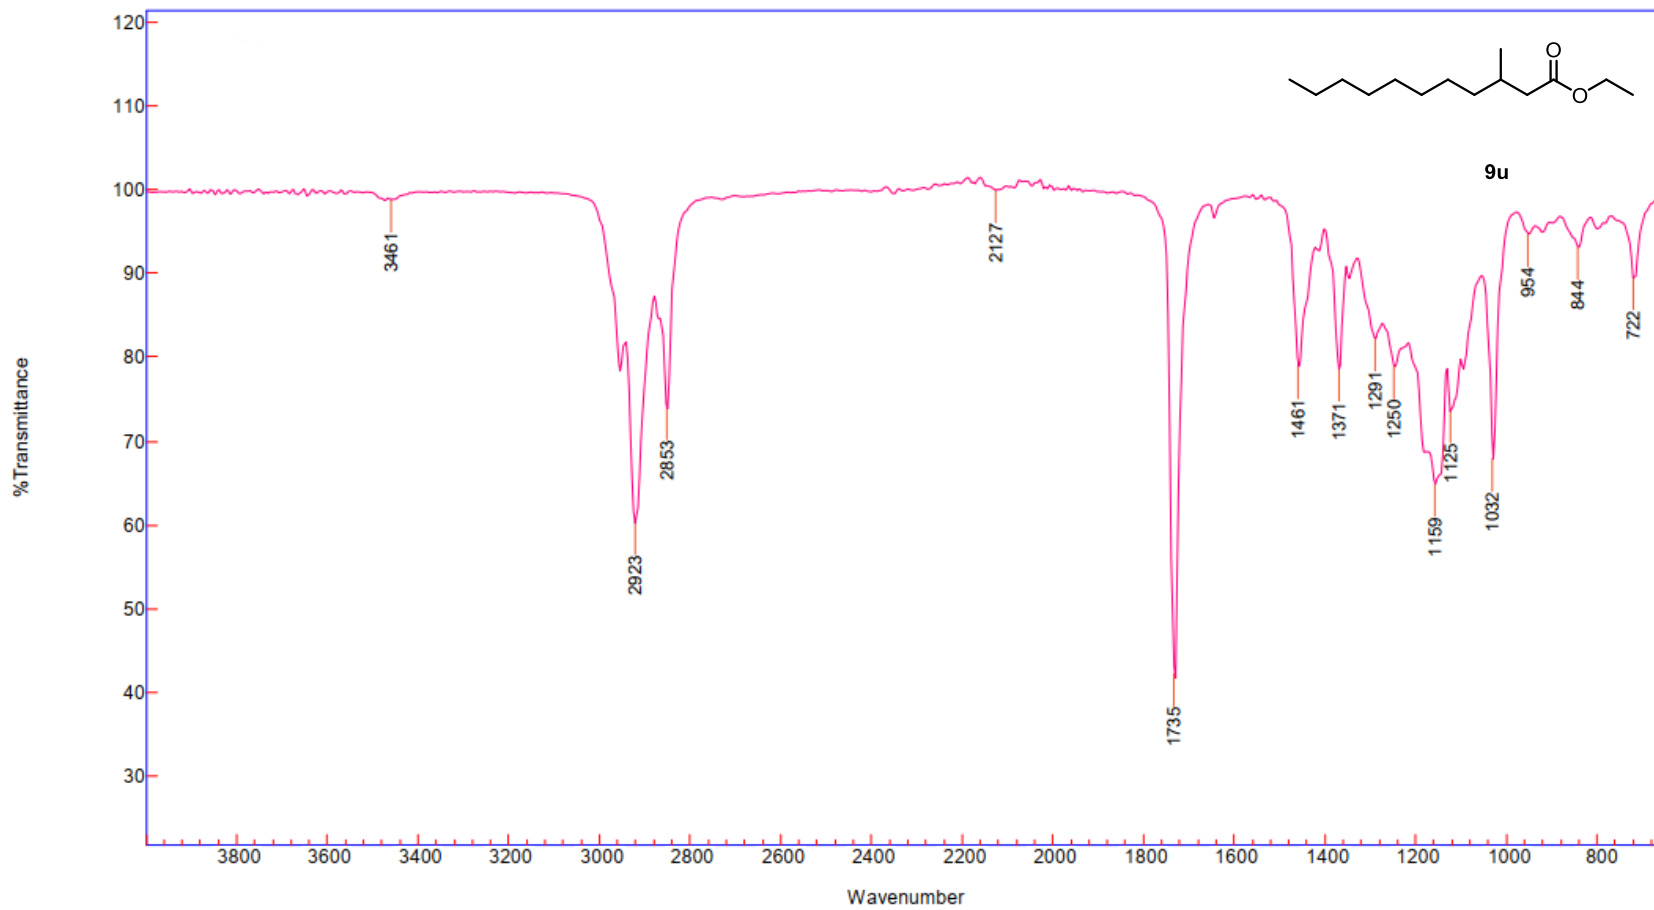

# Ethyl 3-propylhexanoate (9v)

<sup>1</sup>H NMR

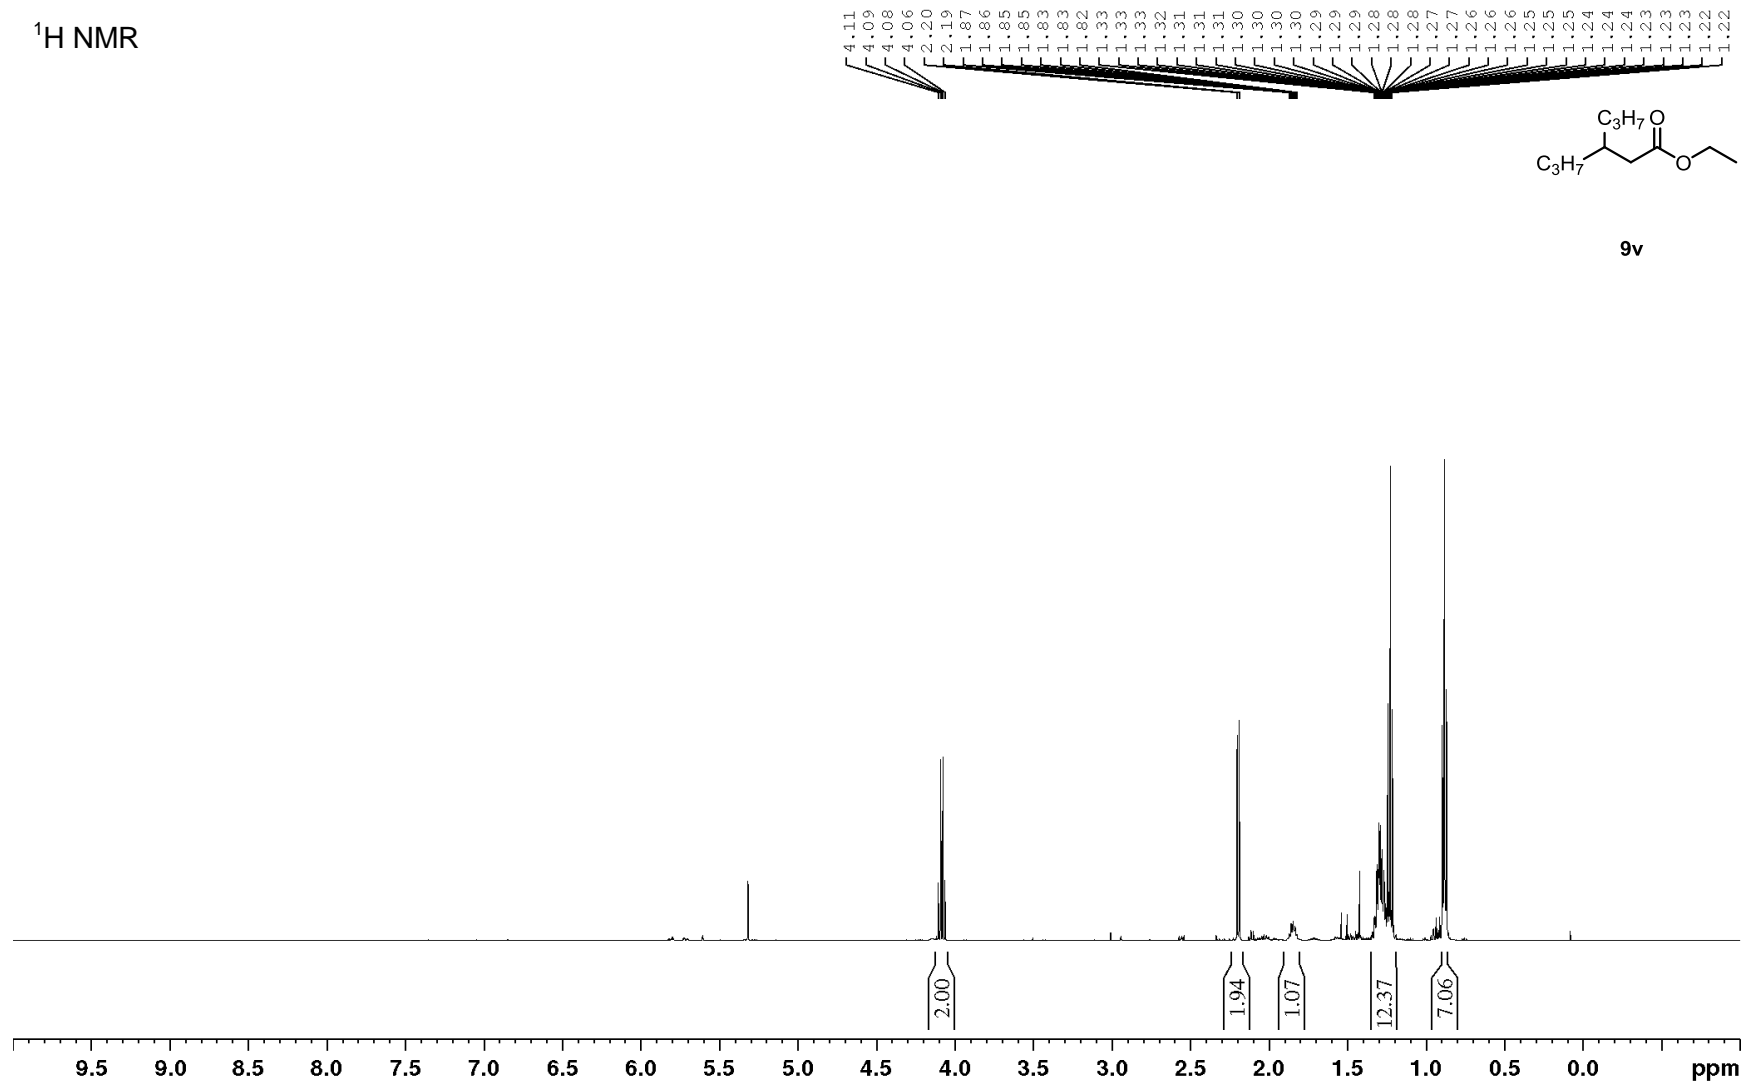

$^{13}\text{C}$  NMR

173.7

60.3

39.6

36.6

35.0

20.1

14.5

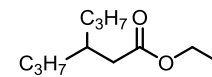

9v

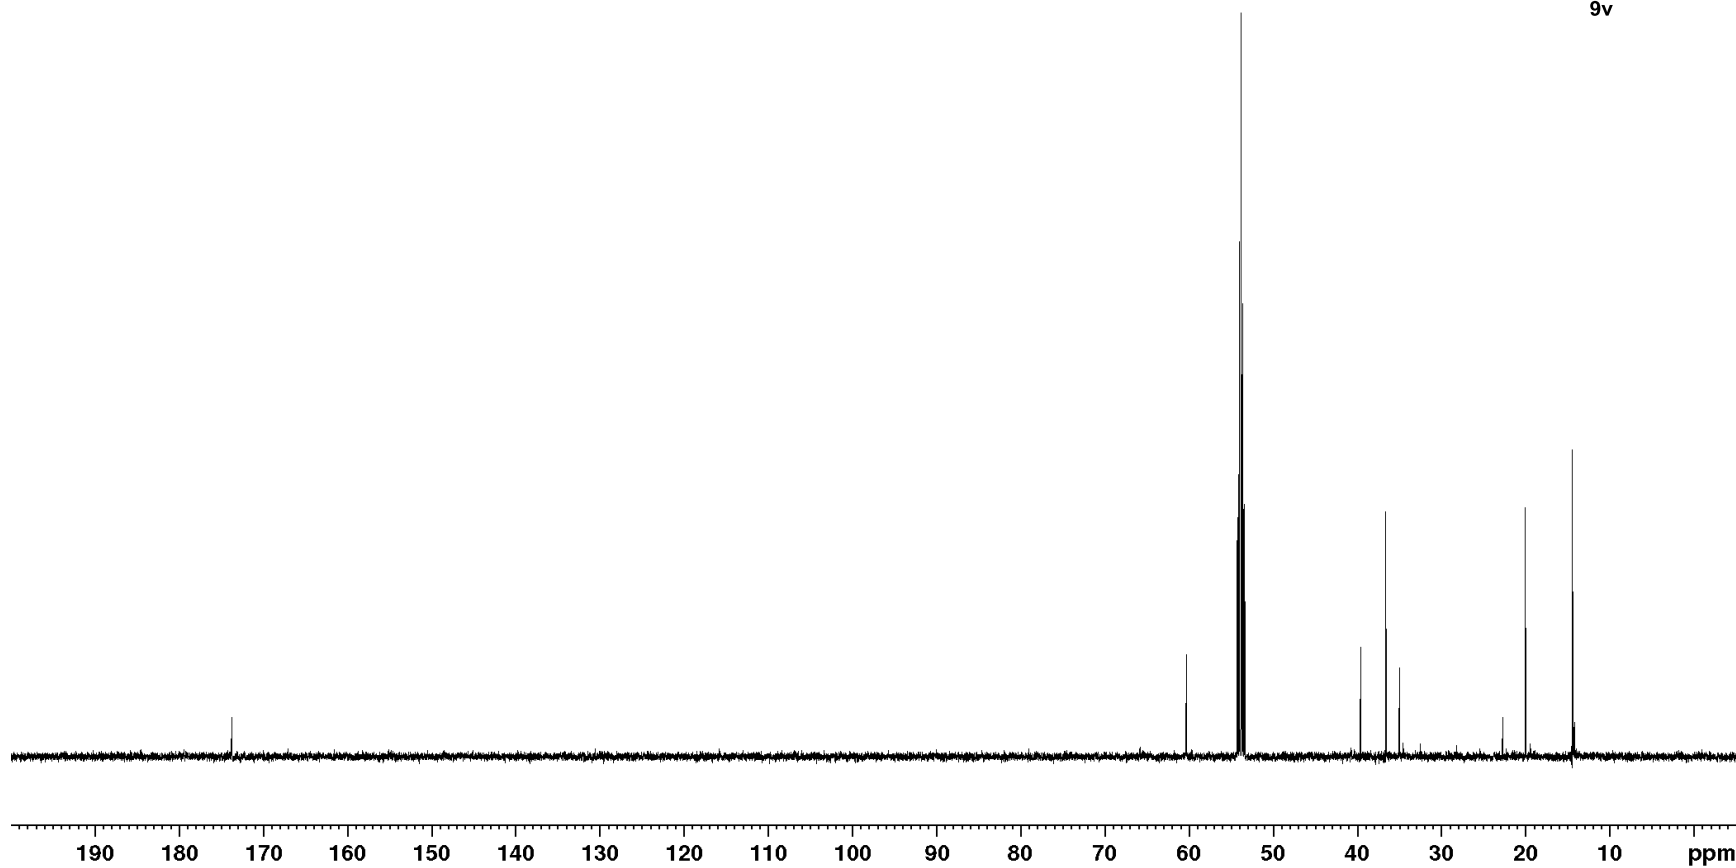

$^1\text{H}$ - $^1\text{H}$  COSY

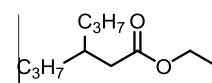

9v

ppm

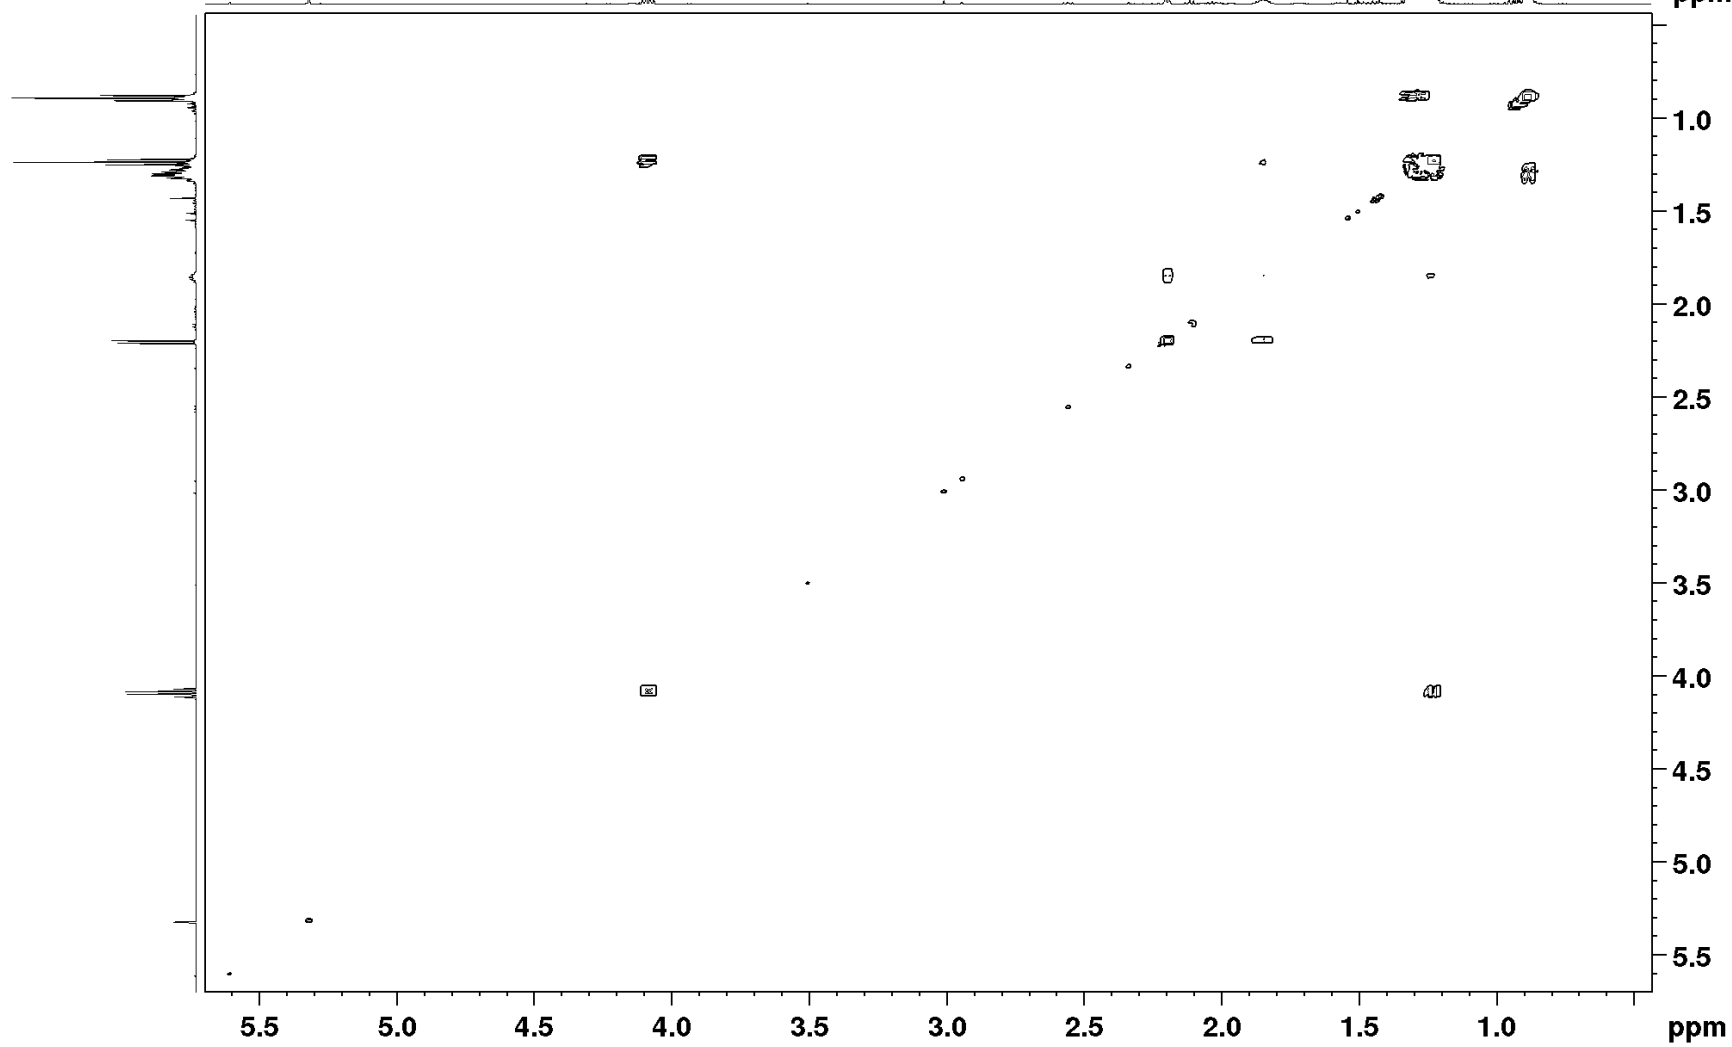

$^1\text{H}$ - $^{13}\text{C}$  HSQC



9v

ppm

0

20

40

60

80

100

120

140

160

ppm

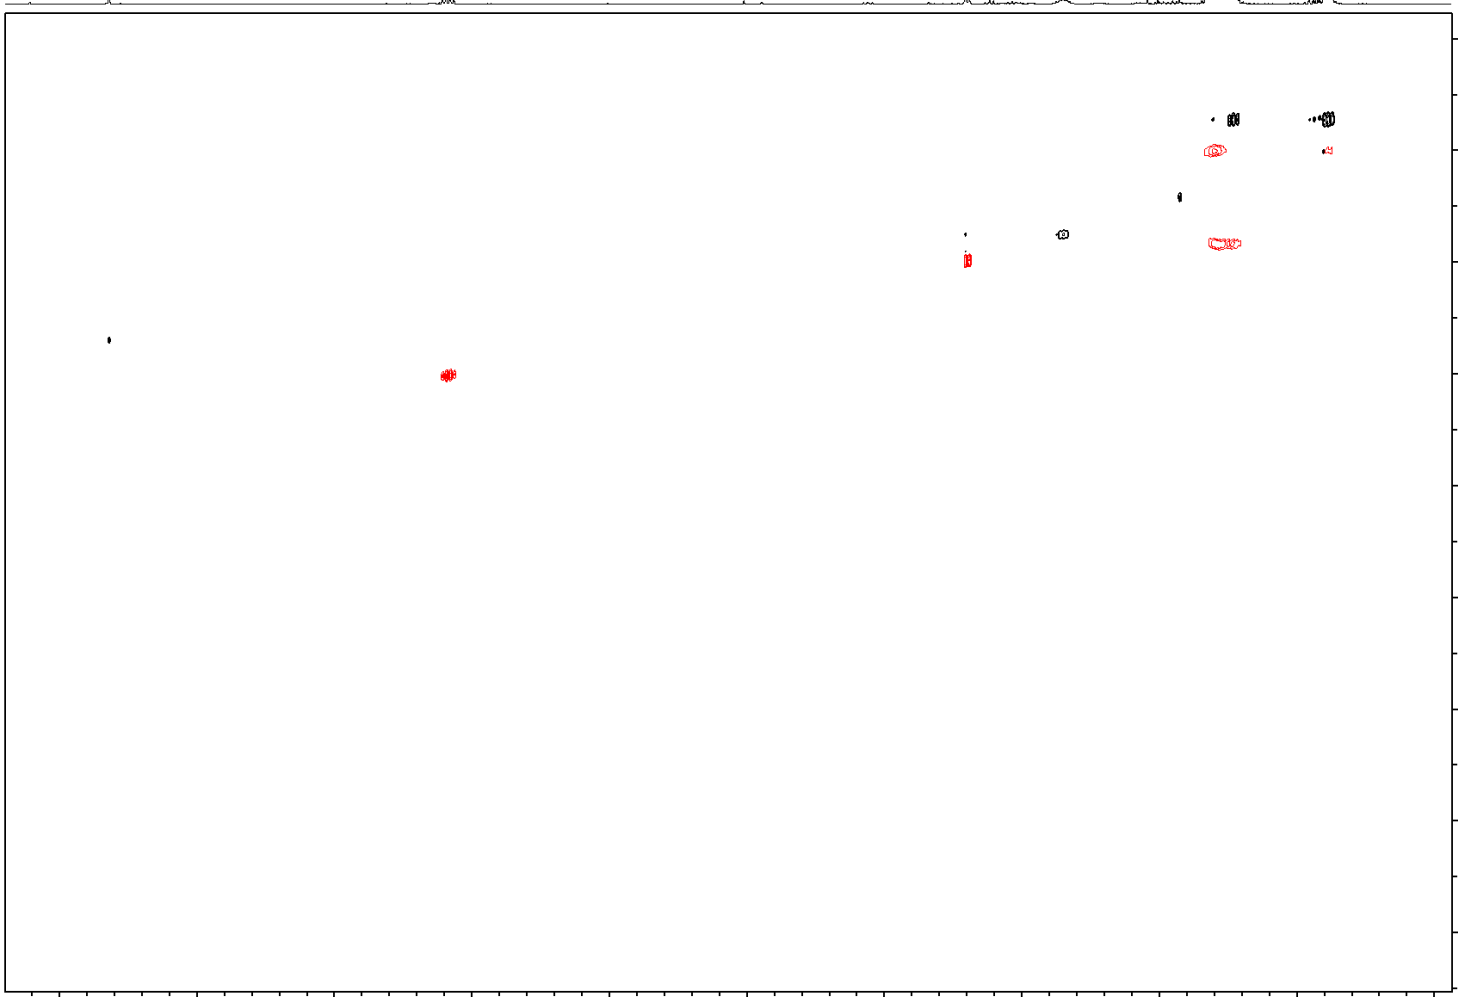



$^1\text{H}$ - $^{13}\text{C}$  HMBC

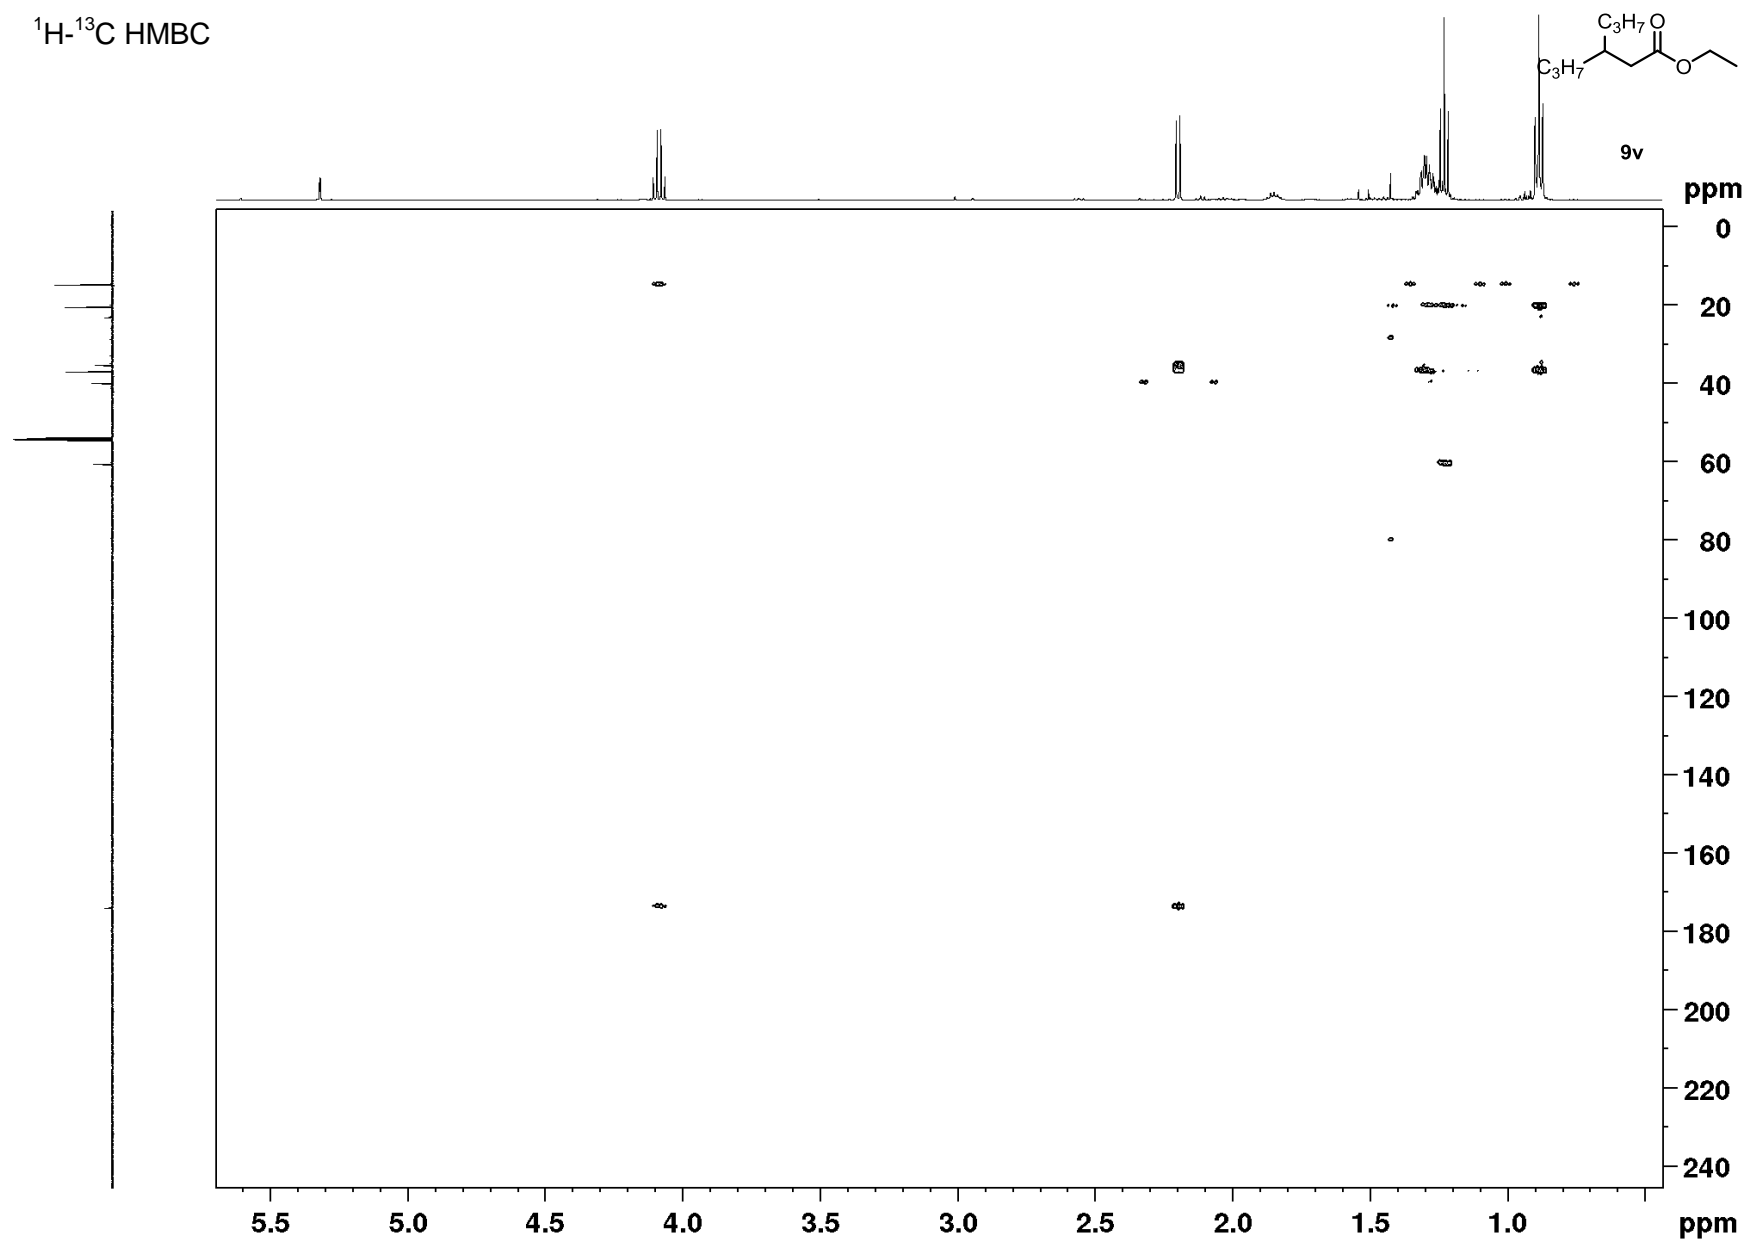

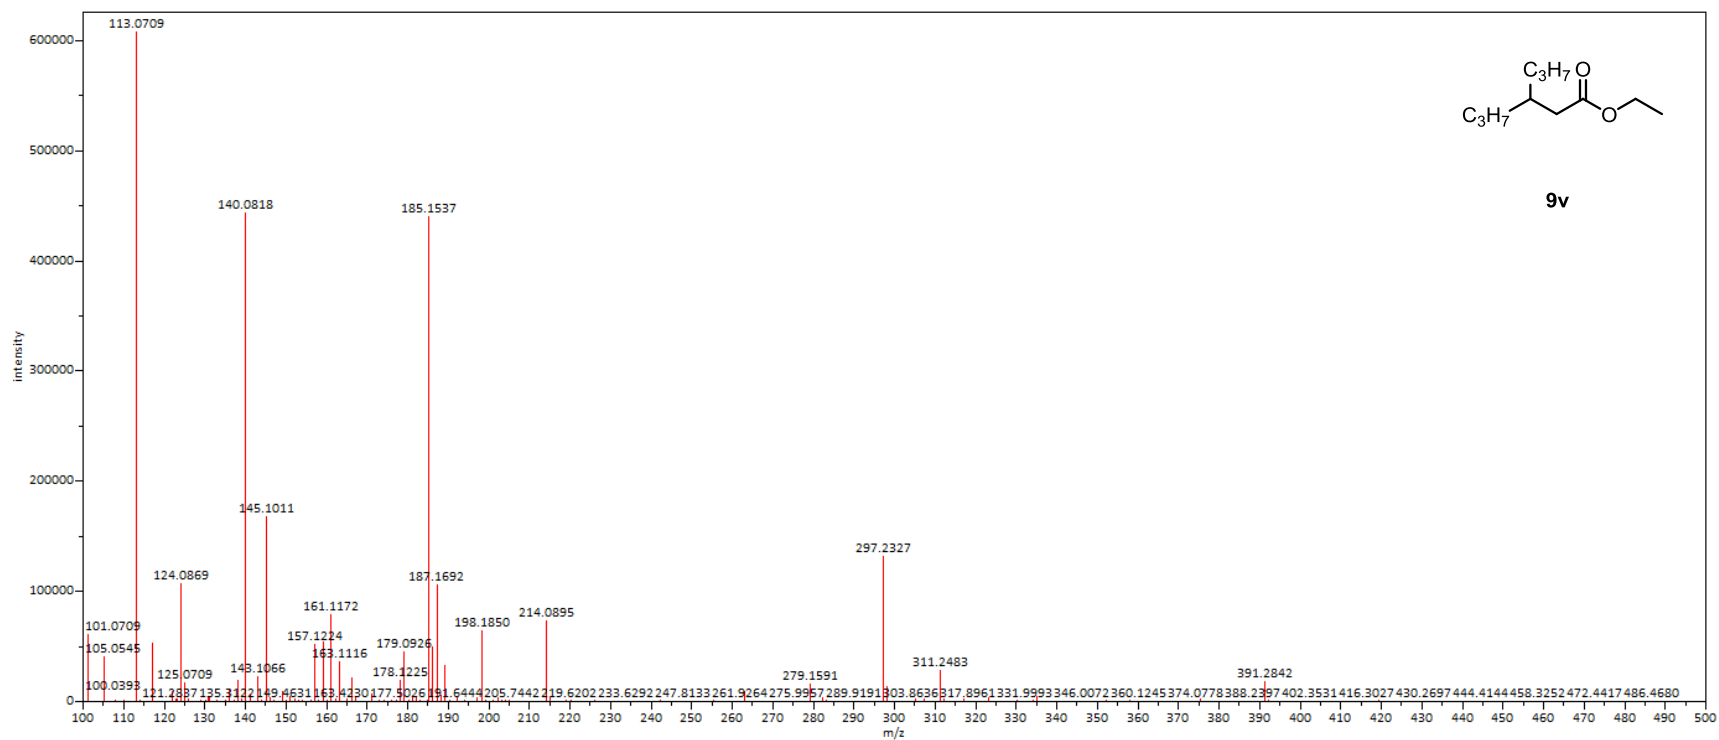

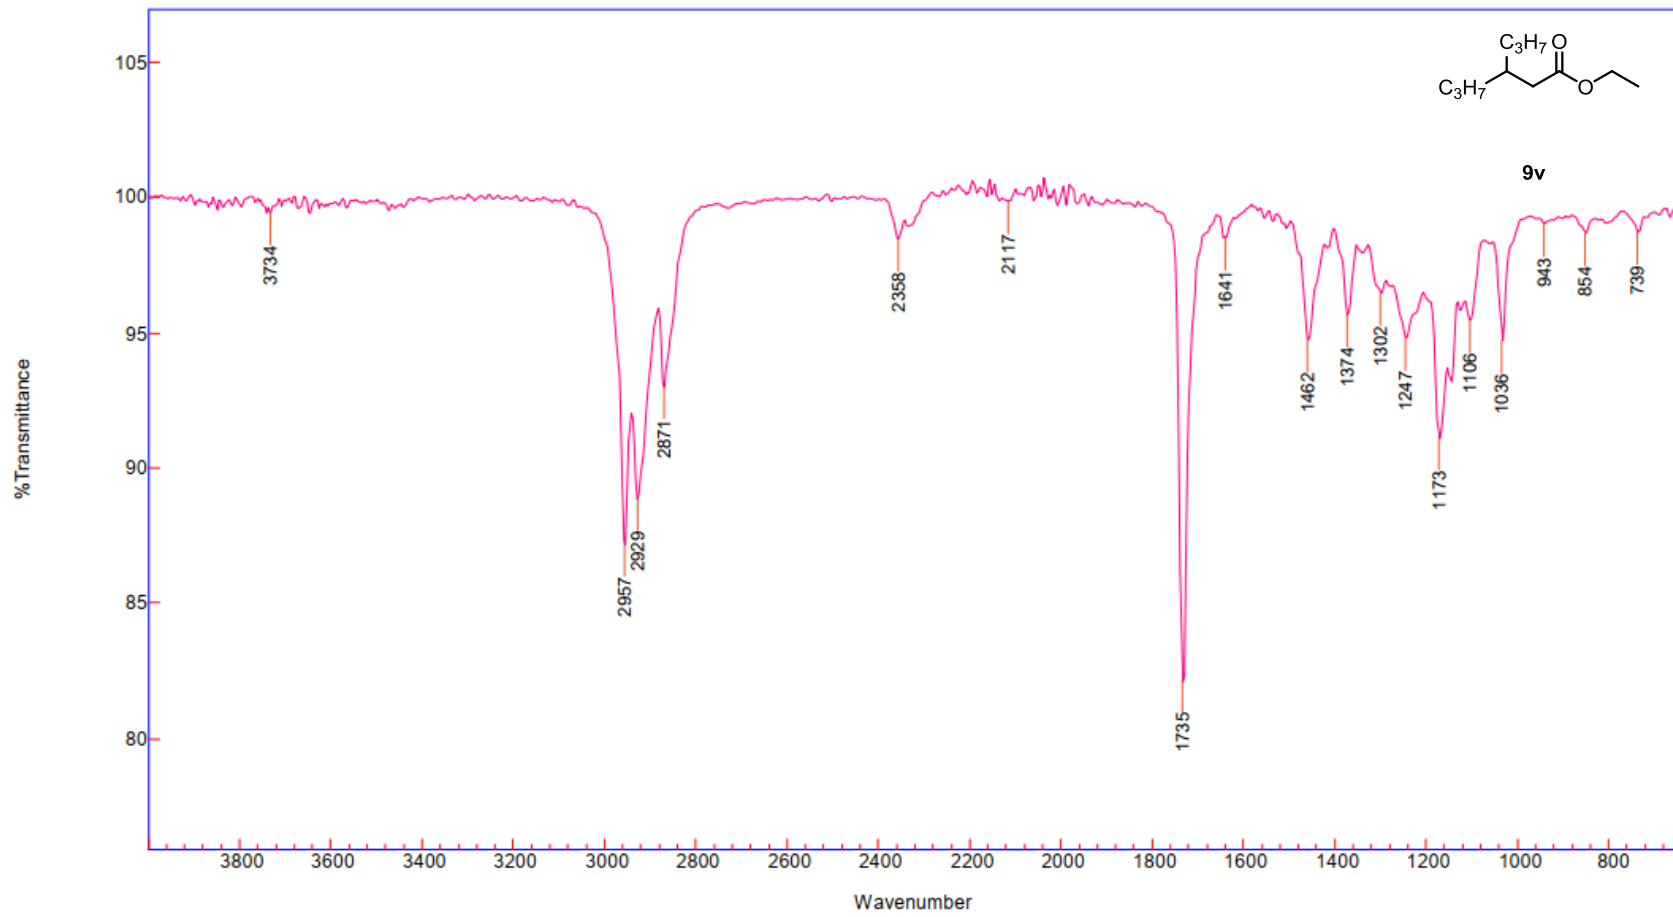

***N,N*-diethyl-3-phenylbutanamide (11)**

<sup>1</sup>H NMR

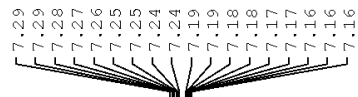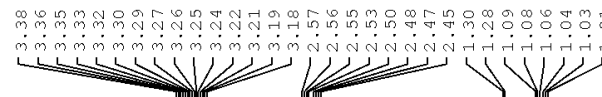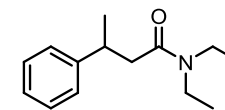

11

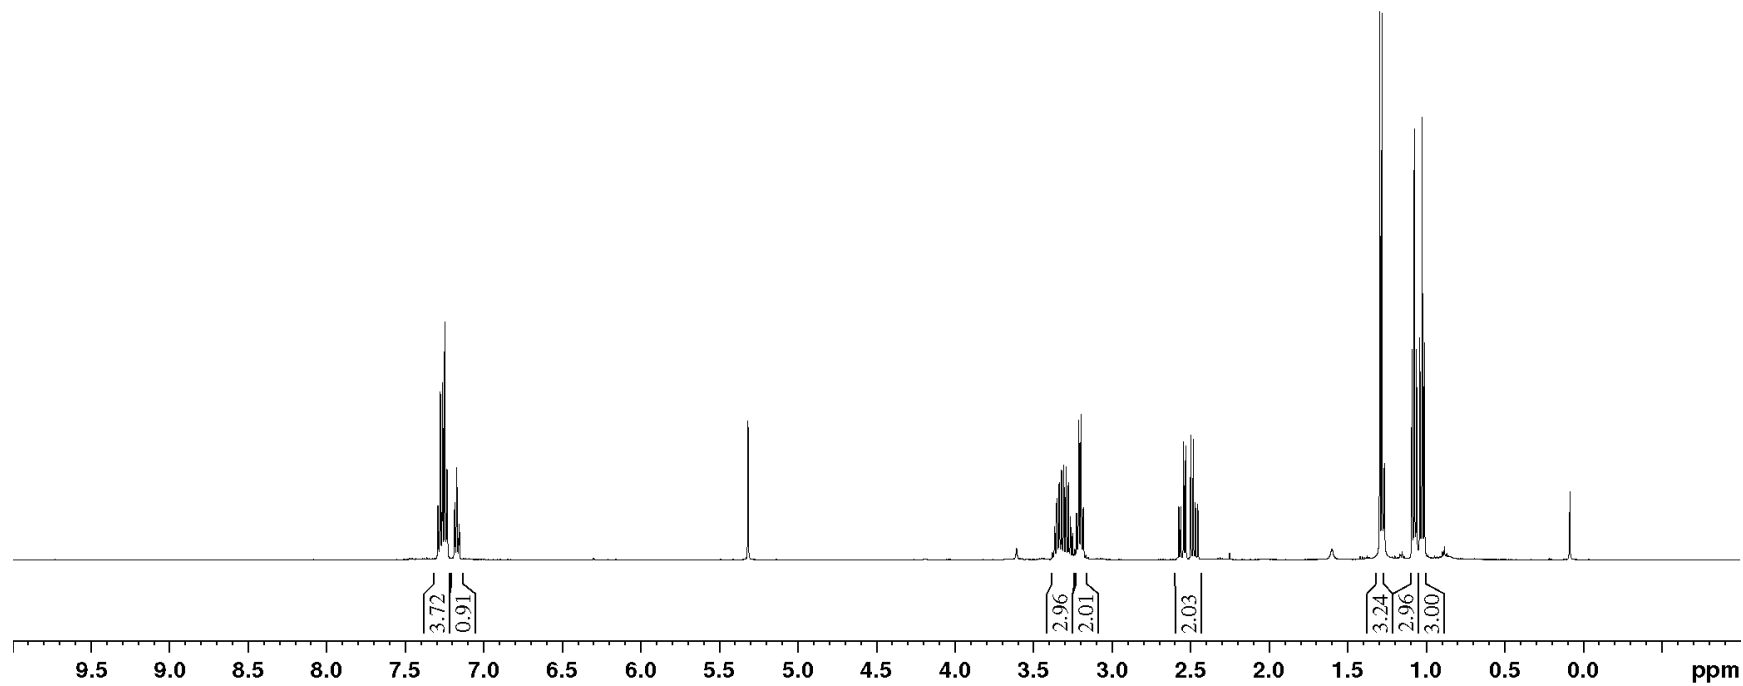

<sup>13</sup>C NMR

170.7

147.4

128.7

127.4

126.4

42.3

41.8

40.4

37.0

21.8

14.6

13.2

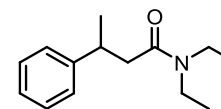

11

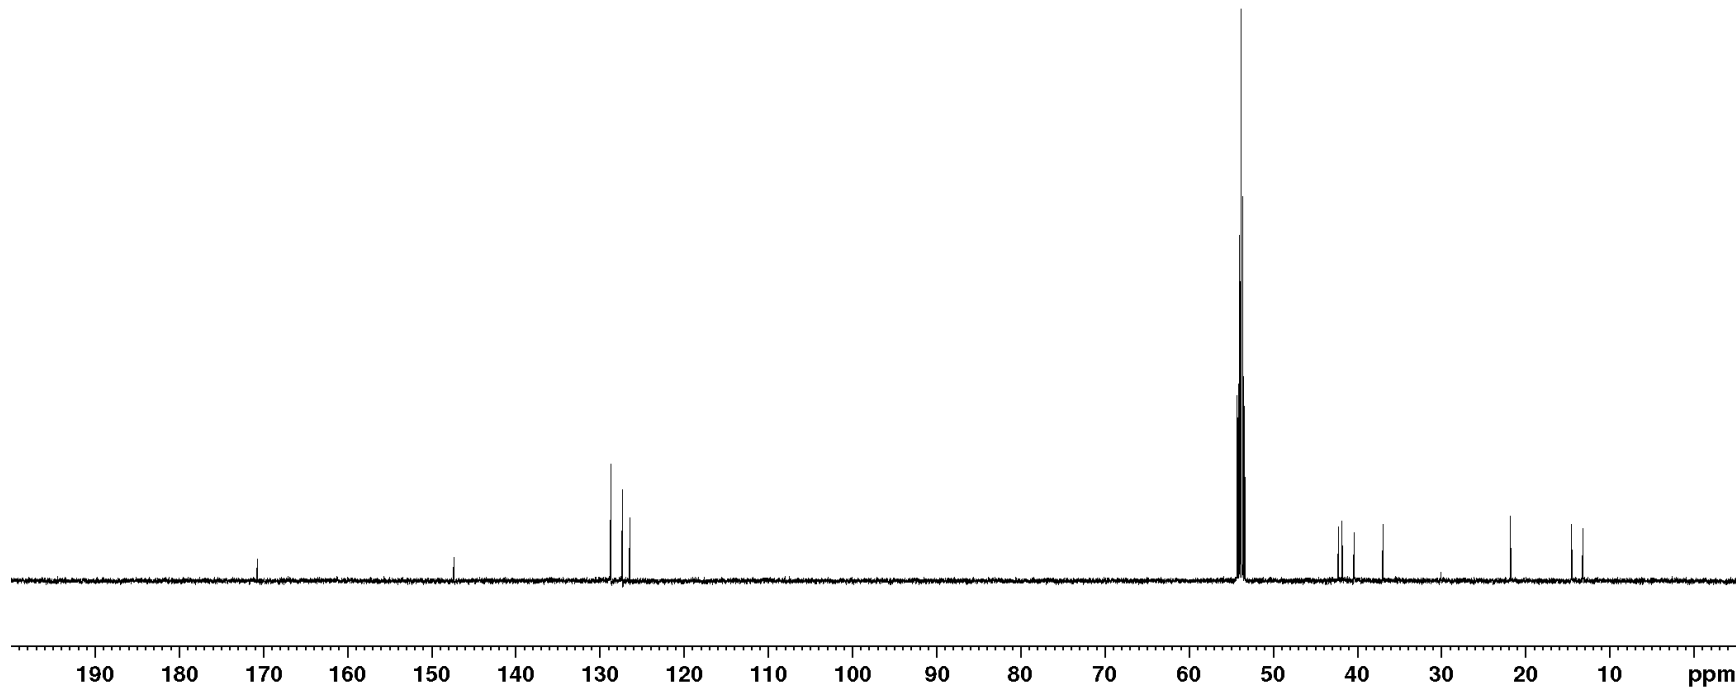

$^1\text{H}$ - $^1\text{H}$  COSY

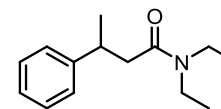

11

ppm

0

1

2

3

4

5

6

7

ppm

7

6

5

4

3

2

1

0

S282

$^1\text{H}$ - $^{13}\text{C}$  HSQC

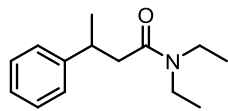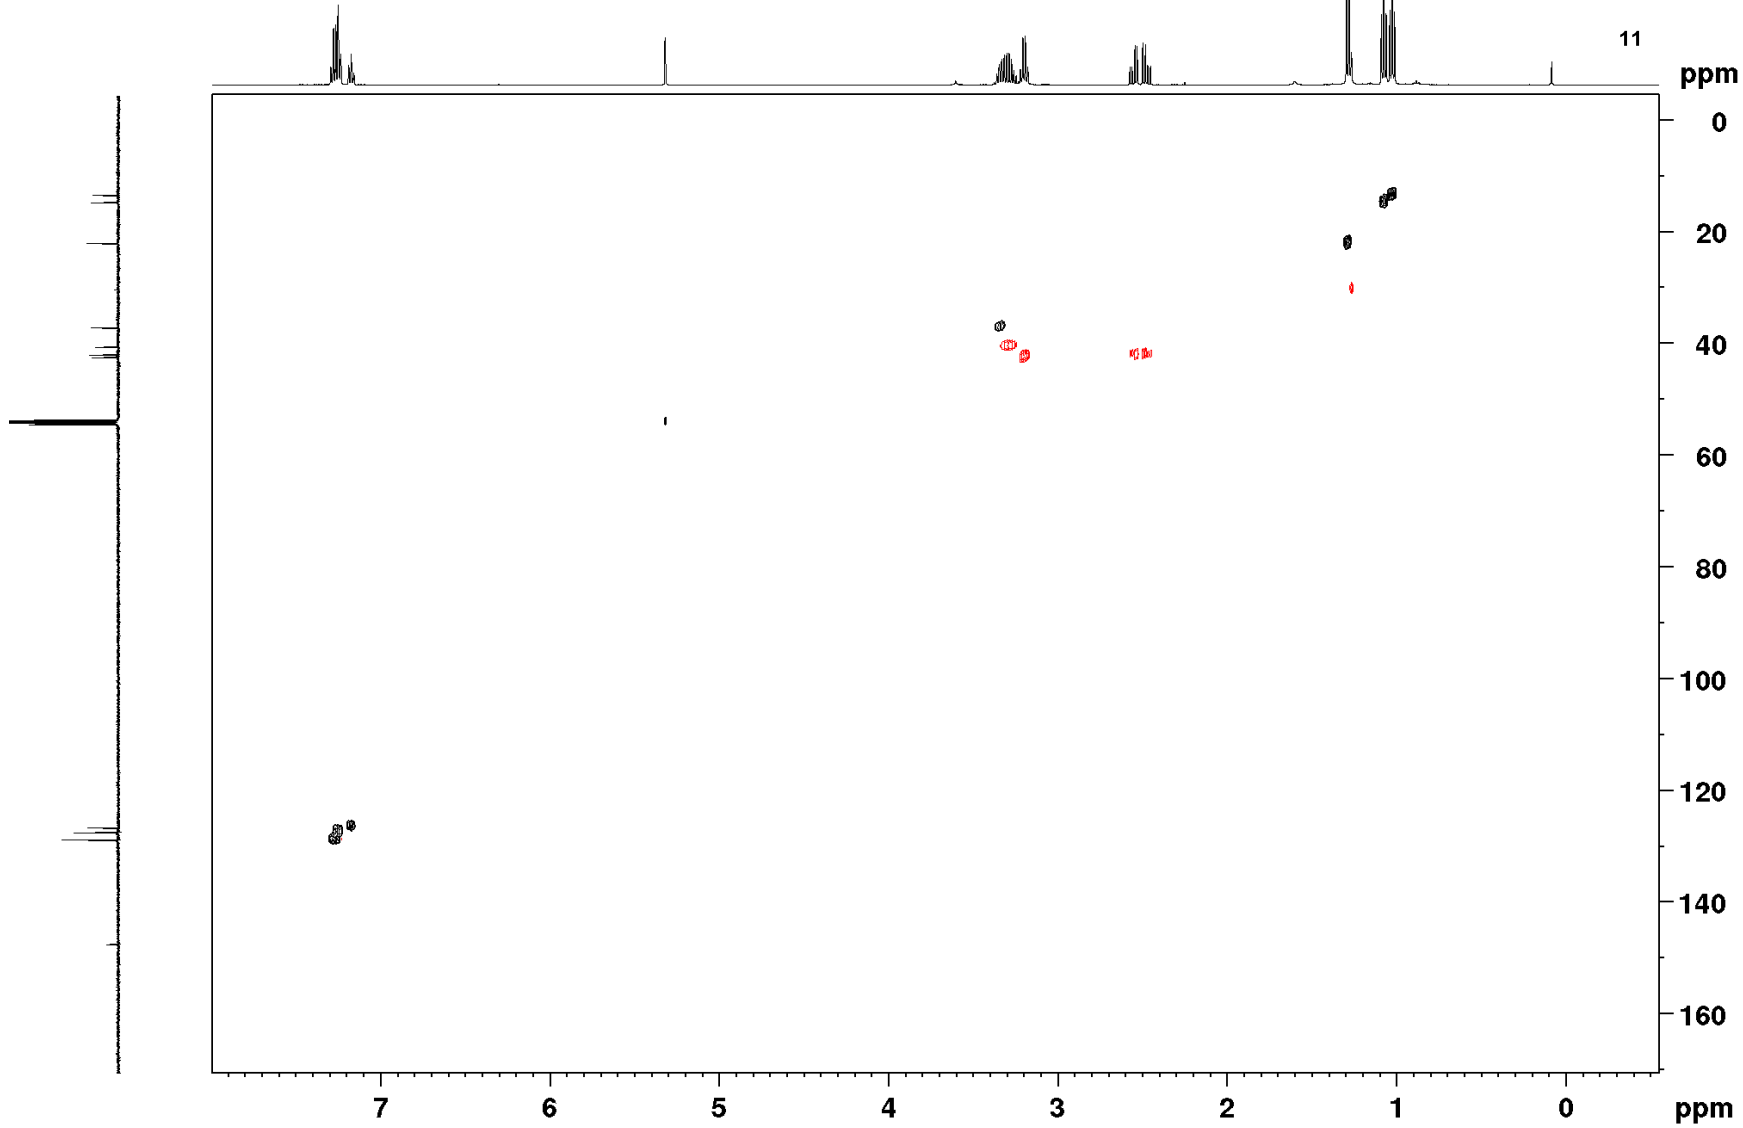

$^1\text{H}$ - $^{13}\text{C}$  HMBC



11

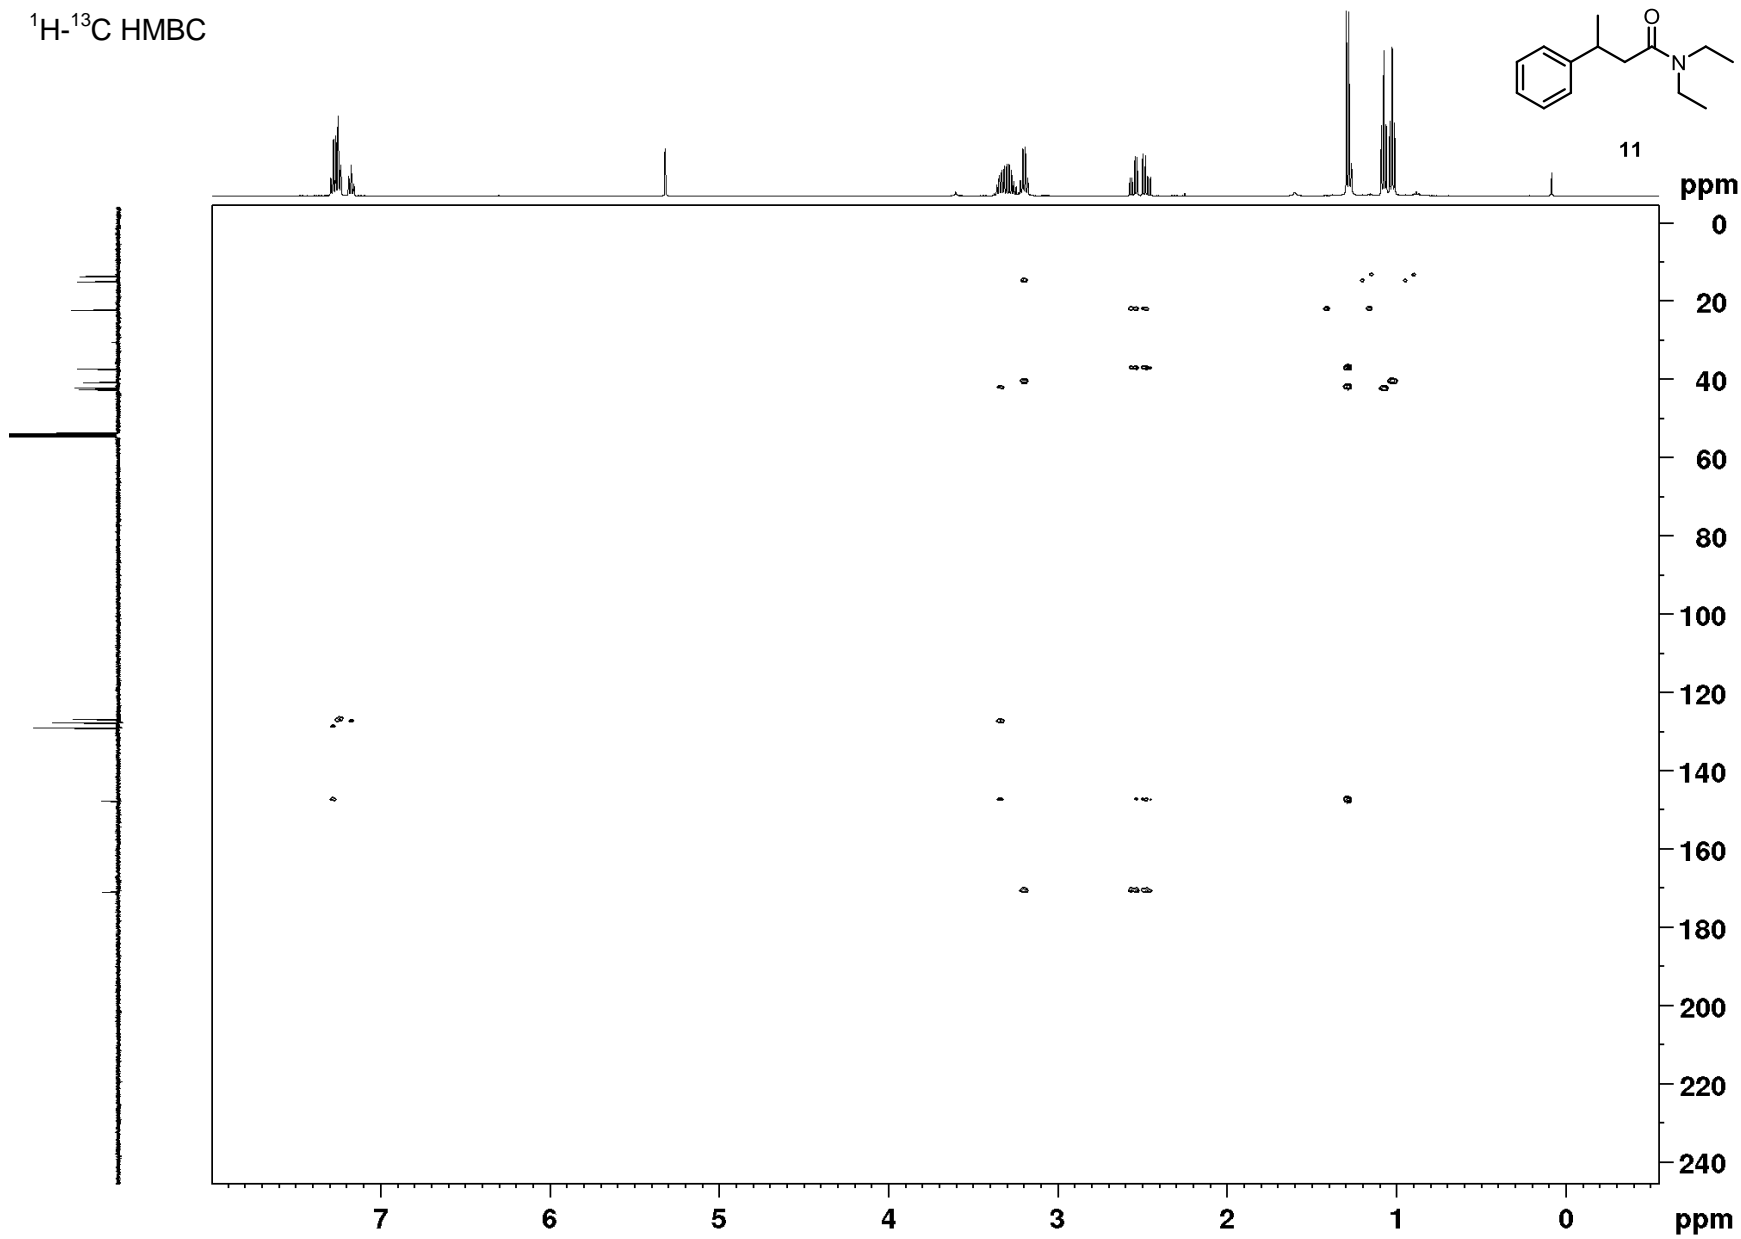



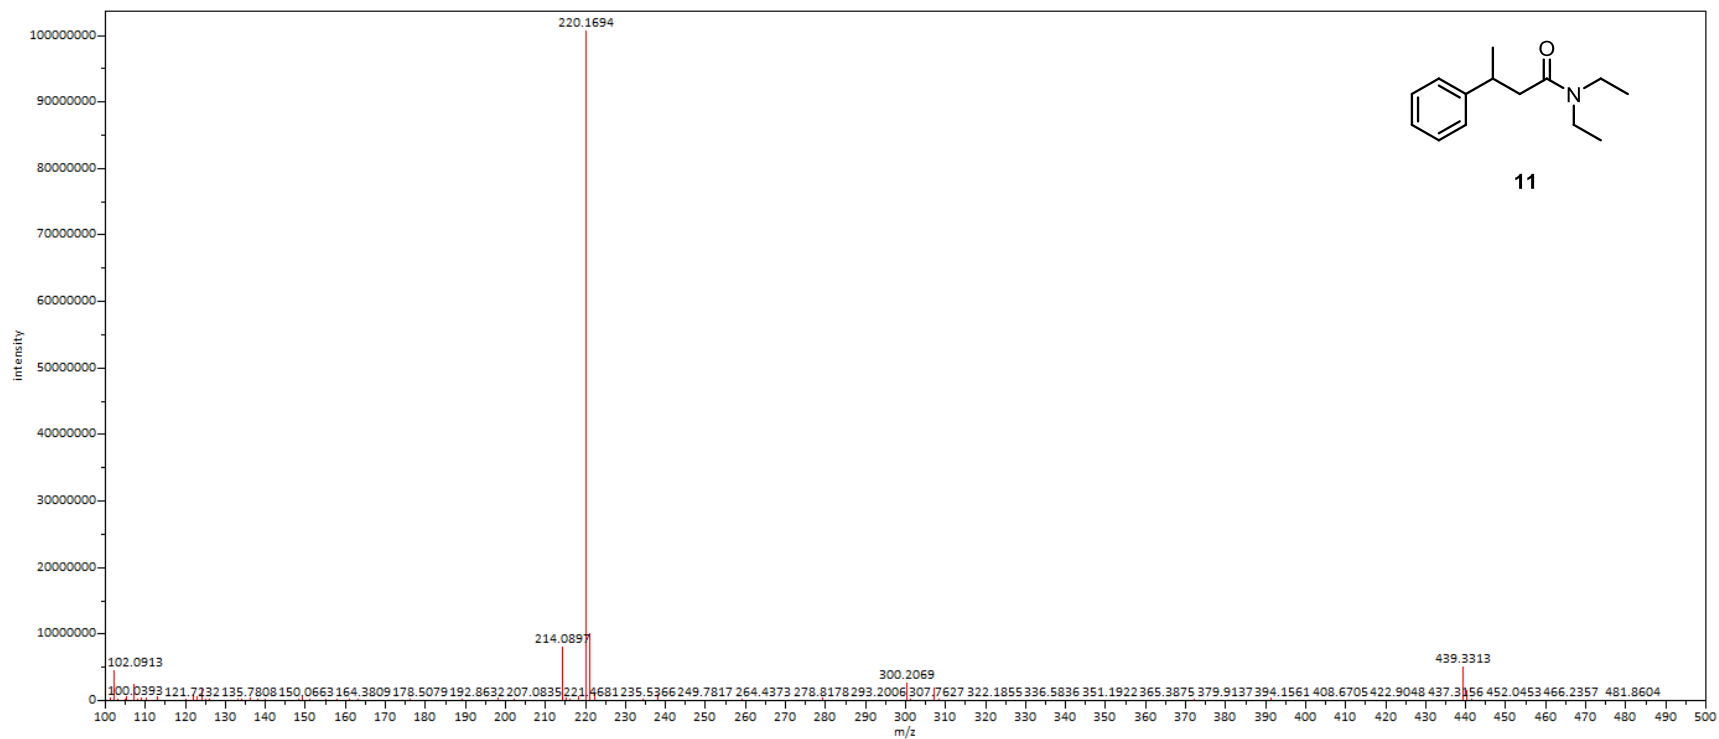

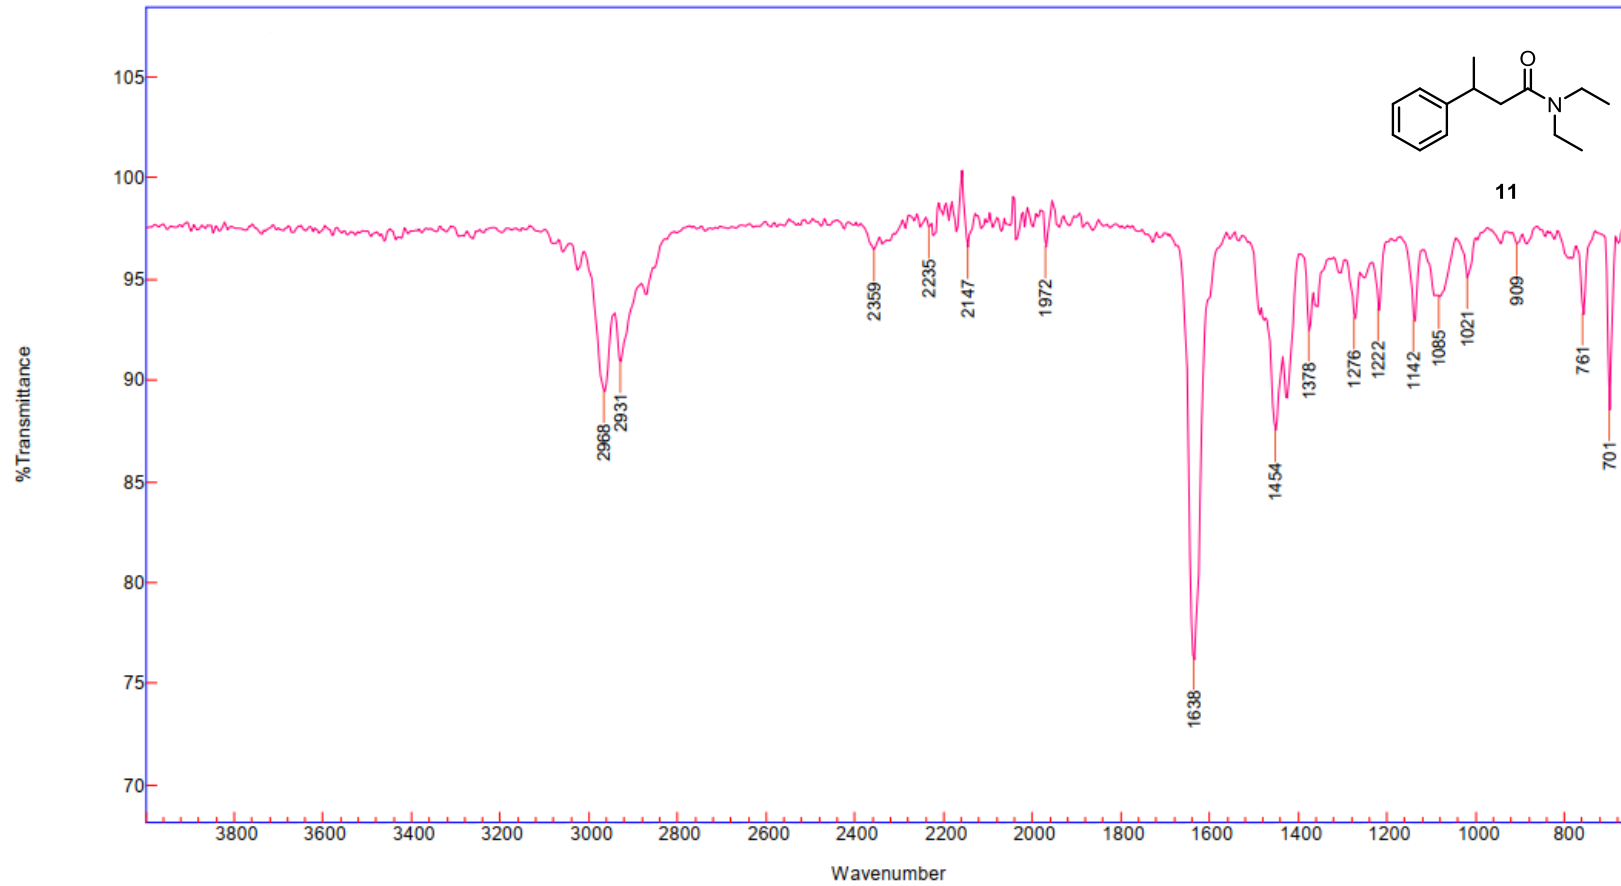

Ethyl (*E*)-5-phenylpent-4-enoate (13a)

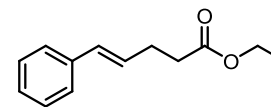

13a

<sup>1</sup>H NMR

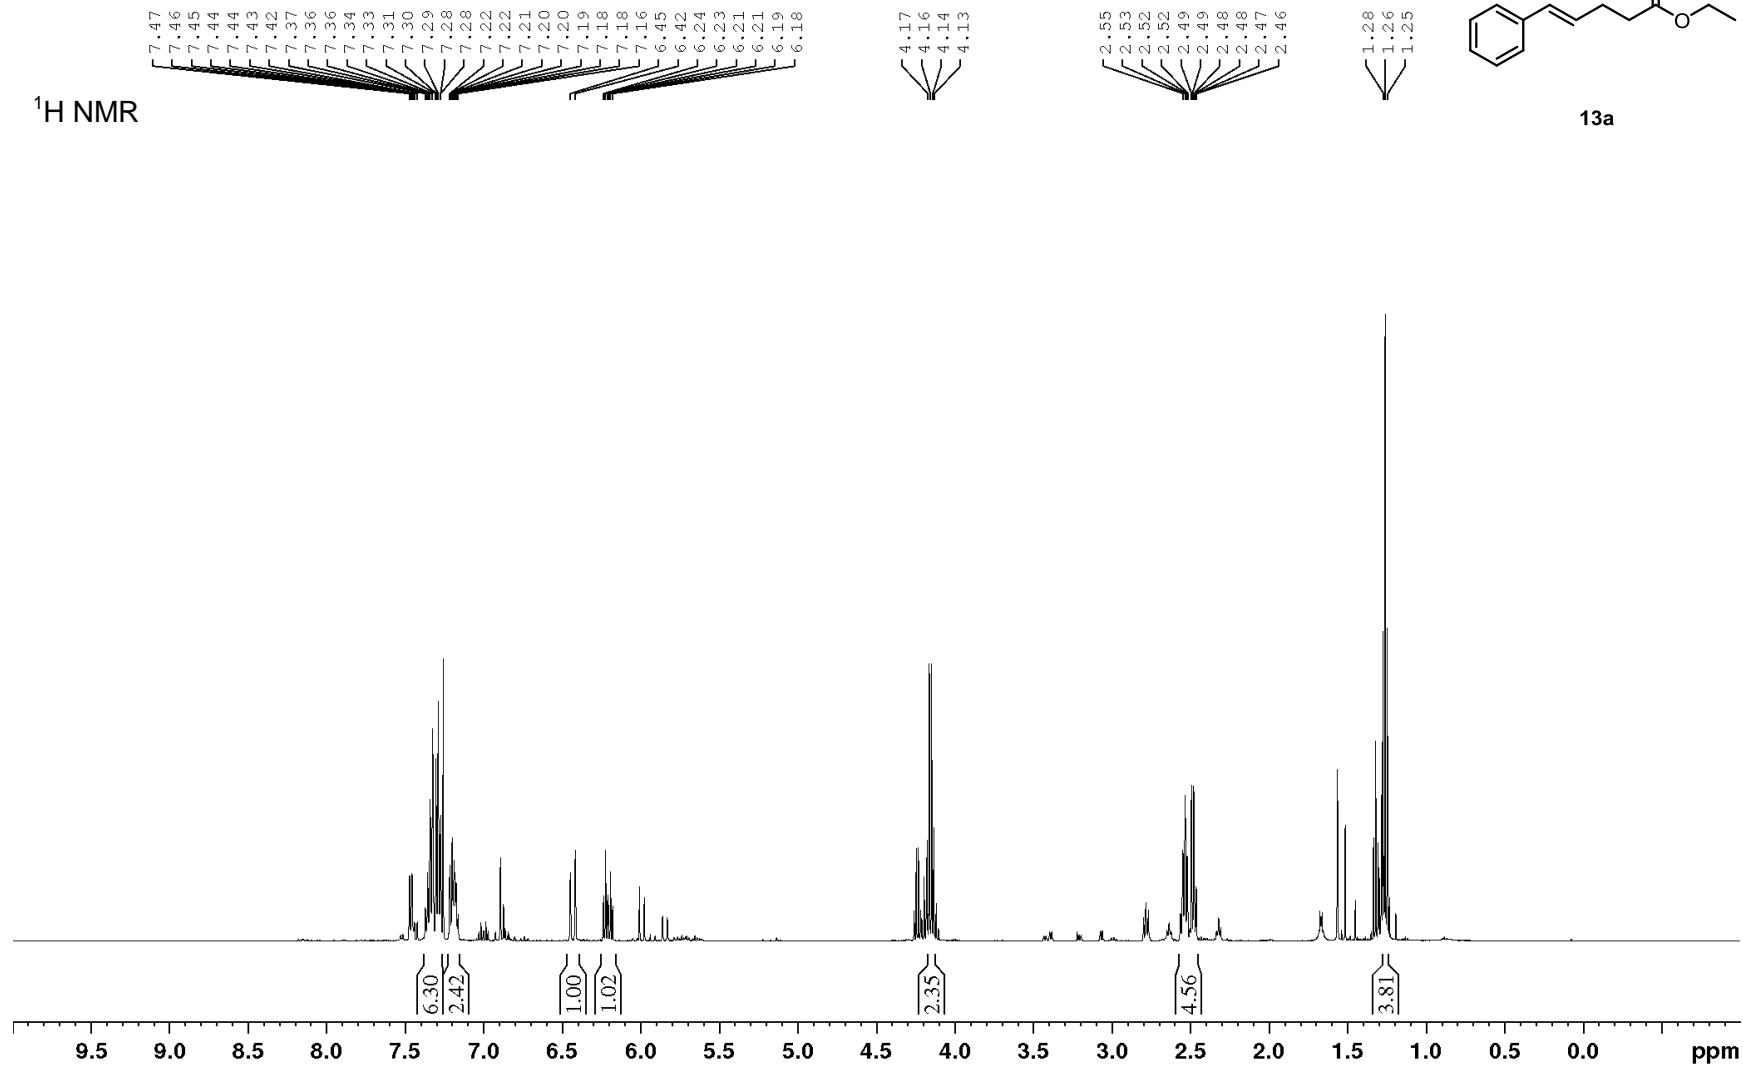

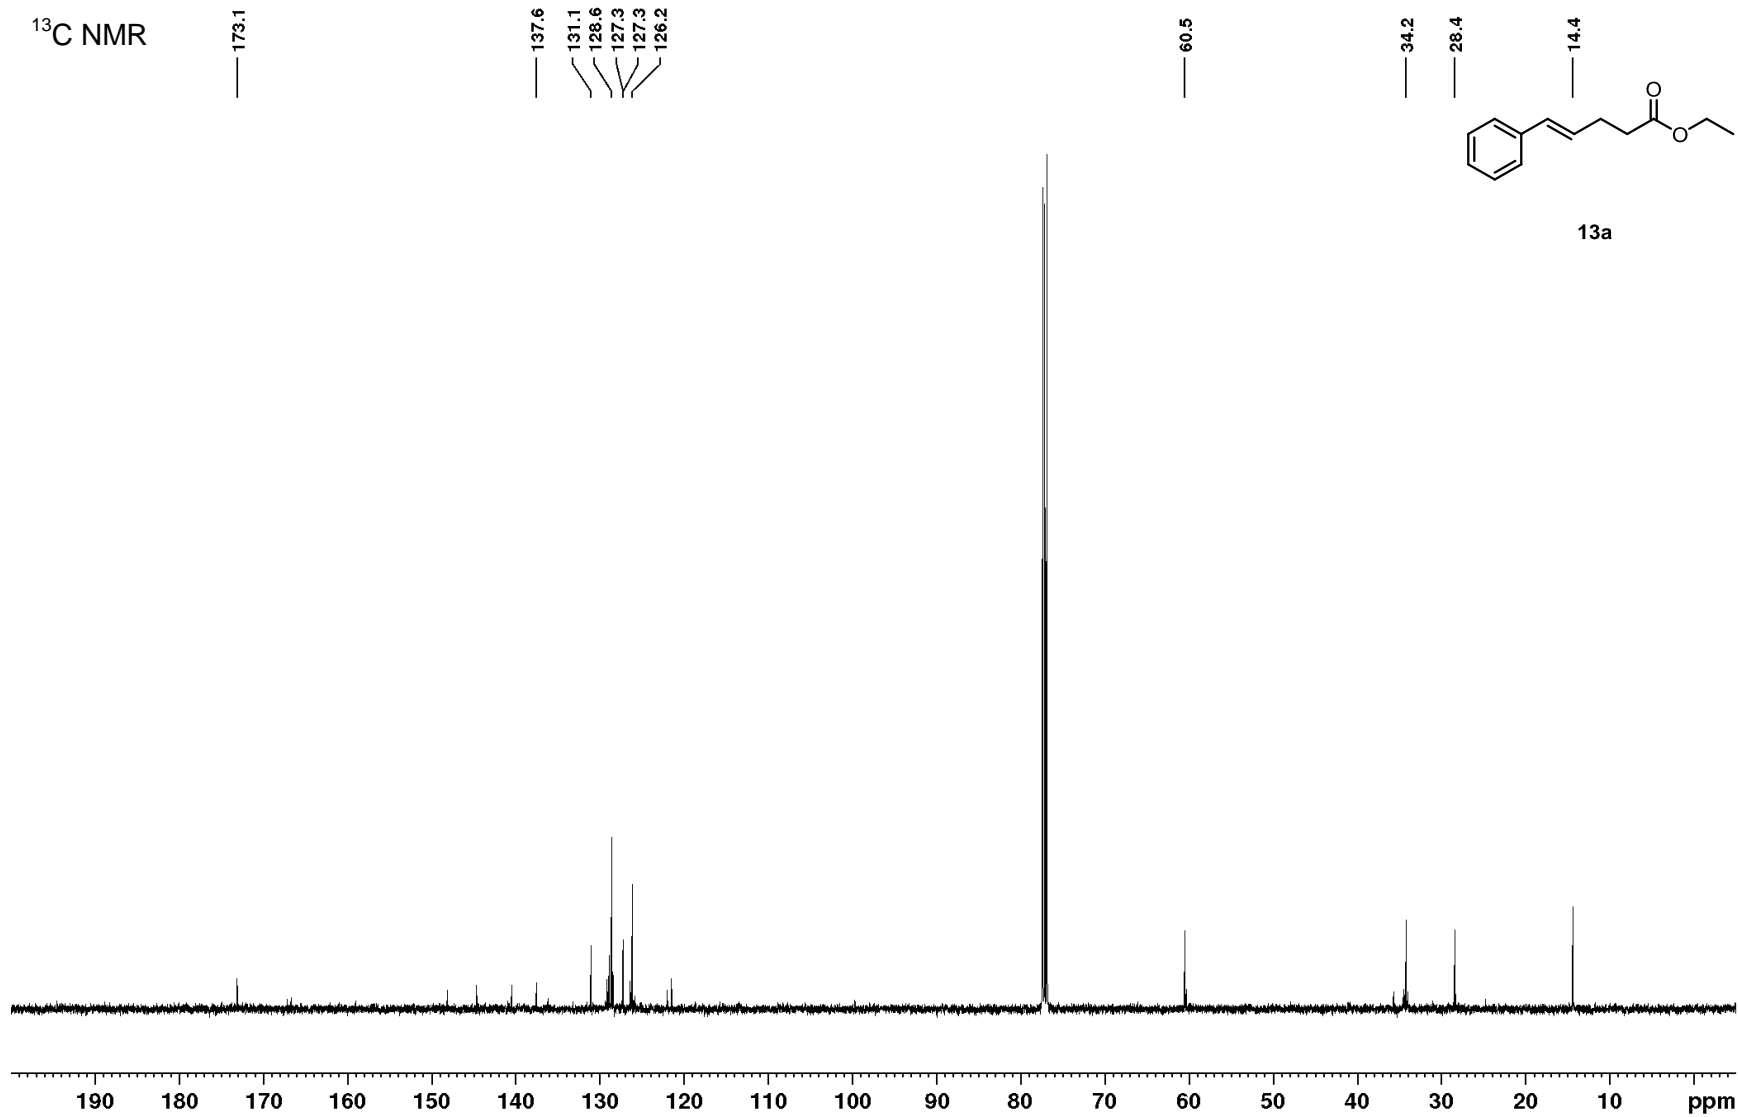

$^1\text{H}$ - $^1\text{H}$  COSY

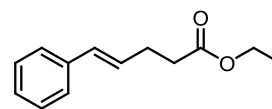

13a

ppm

1

2

3

4

5

6

7

8

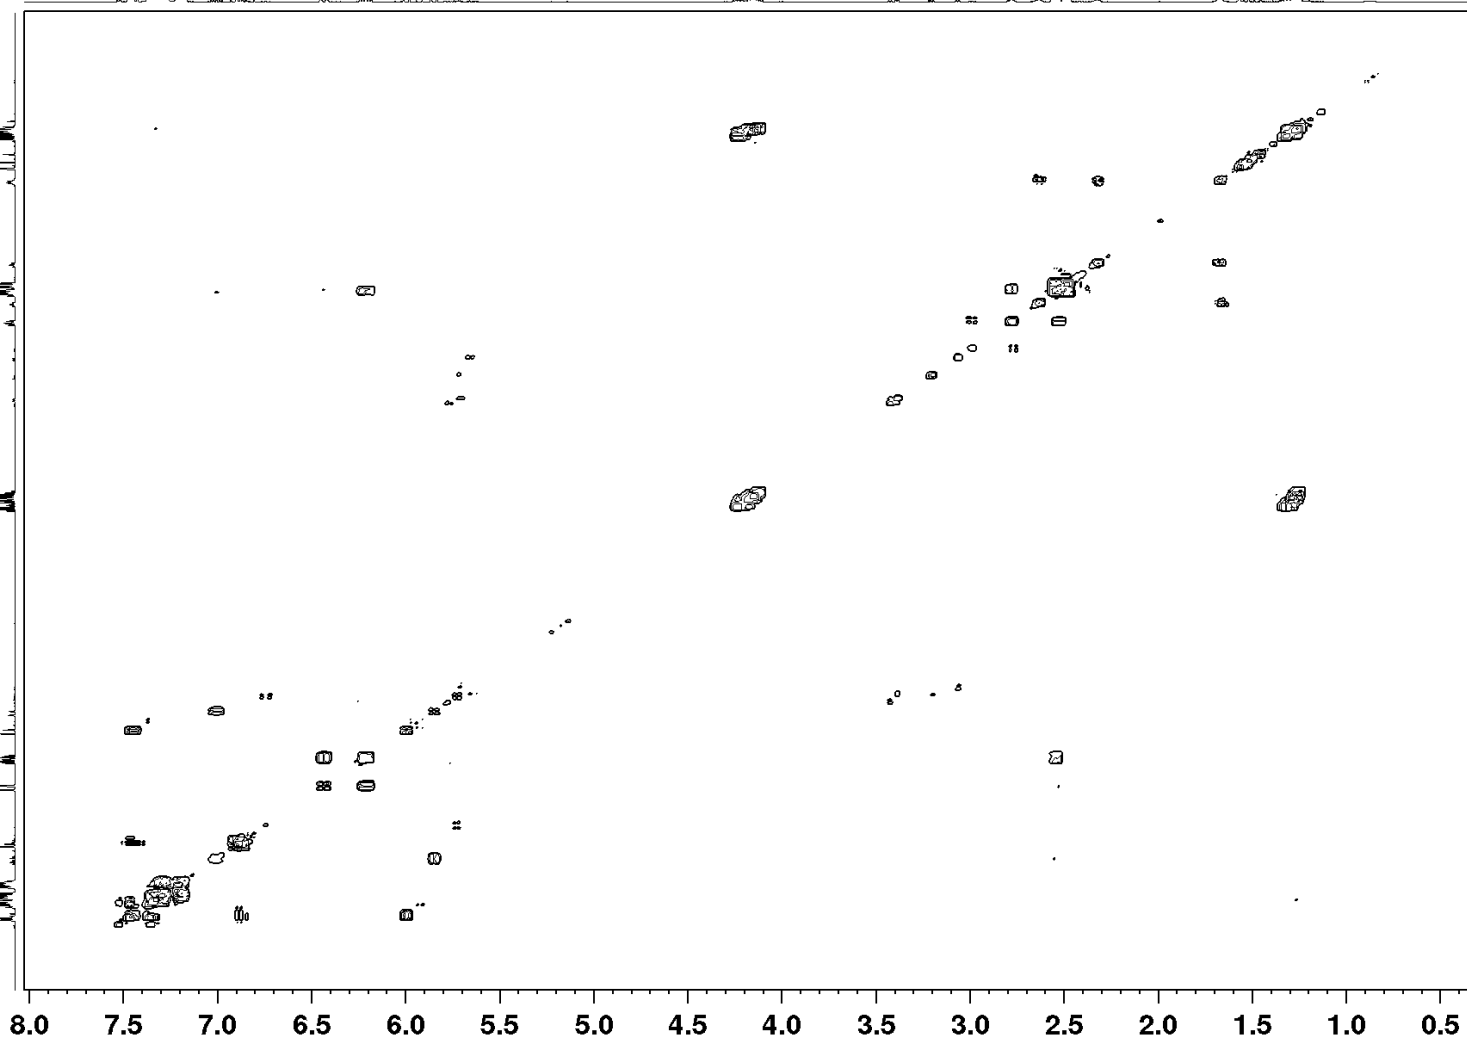

8.0 7.5 7.0 6.5 6.0 5.5 5.0 4.5 4.0 3.5 3.0 2.5 2.0 1.5 1.0 0.5 ppm

$^1\text{H}$ - $^{13}\text{C}$  HSQC

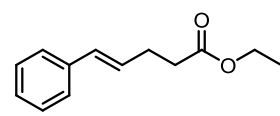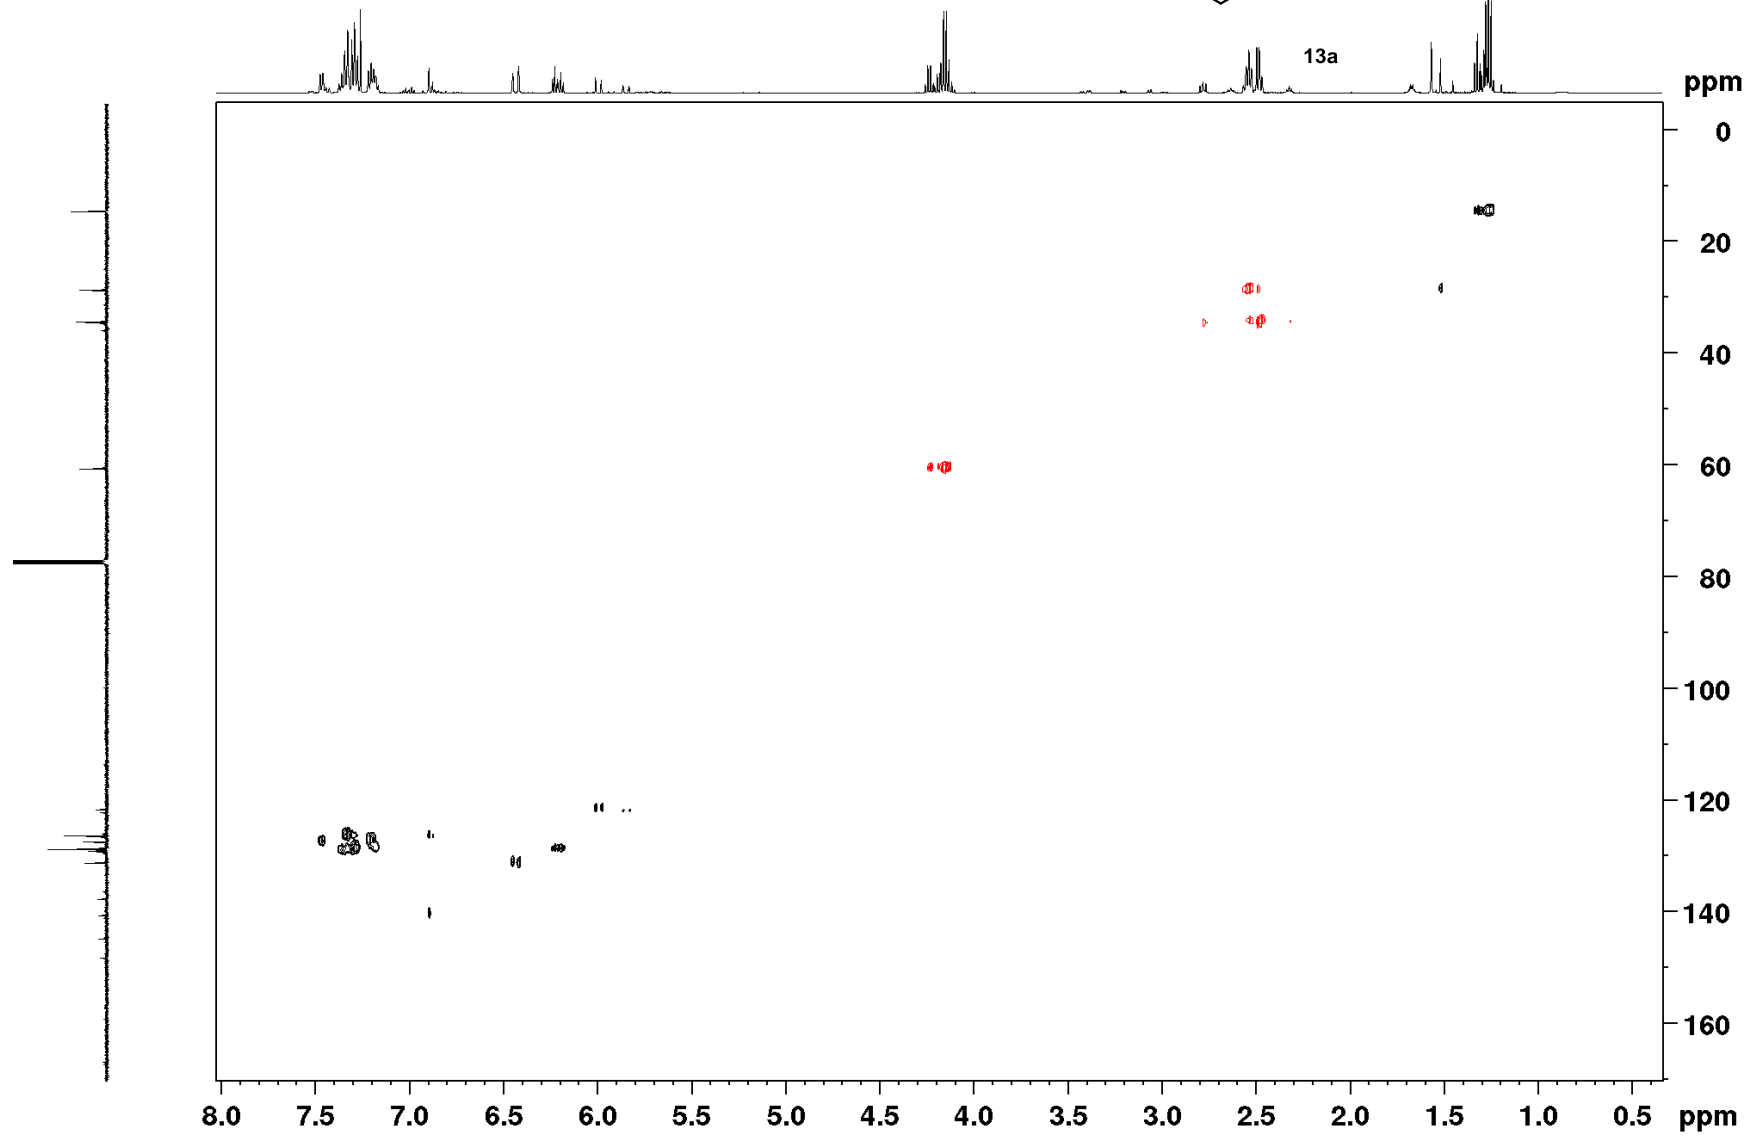

$^1\text{H}$ - $^{13}\text{C}$  HMBC

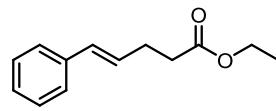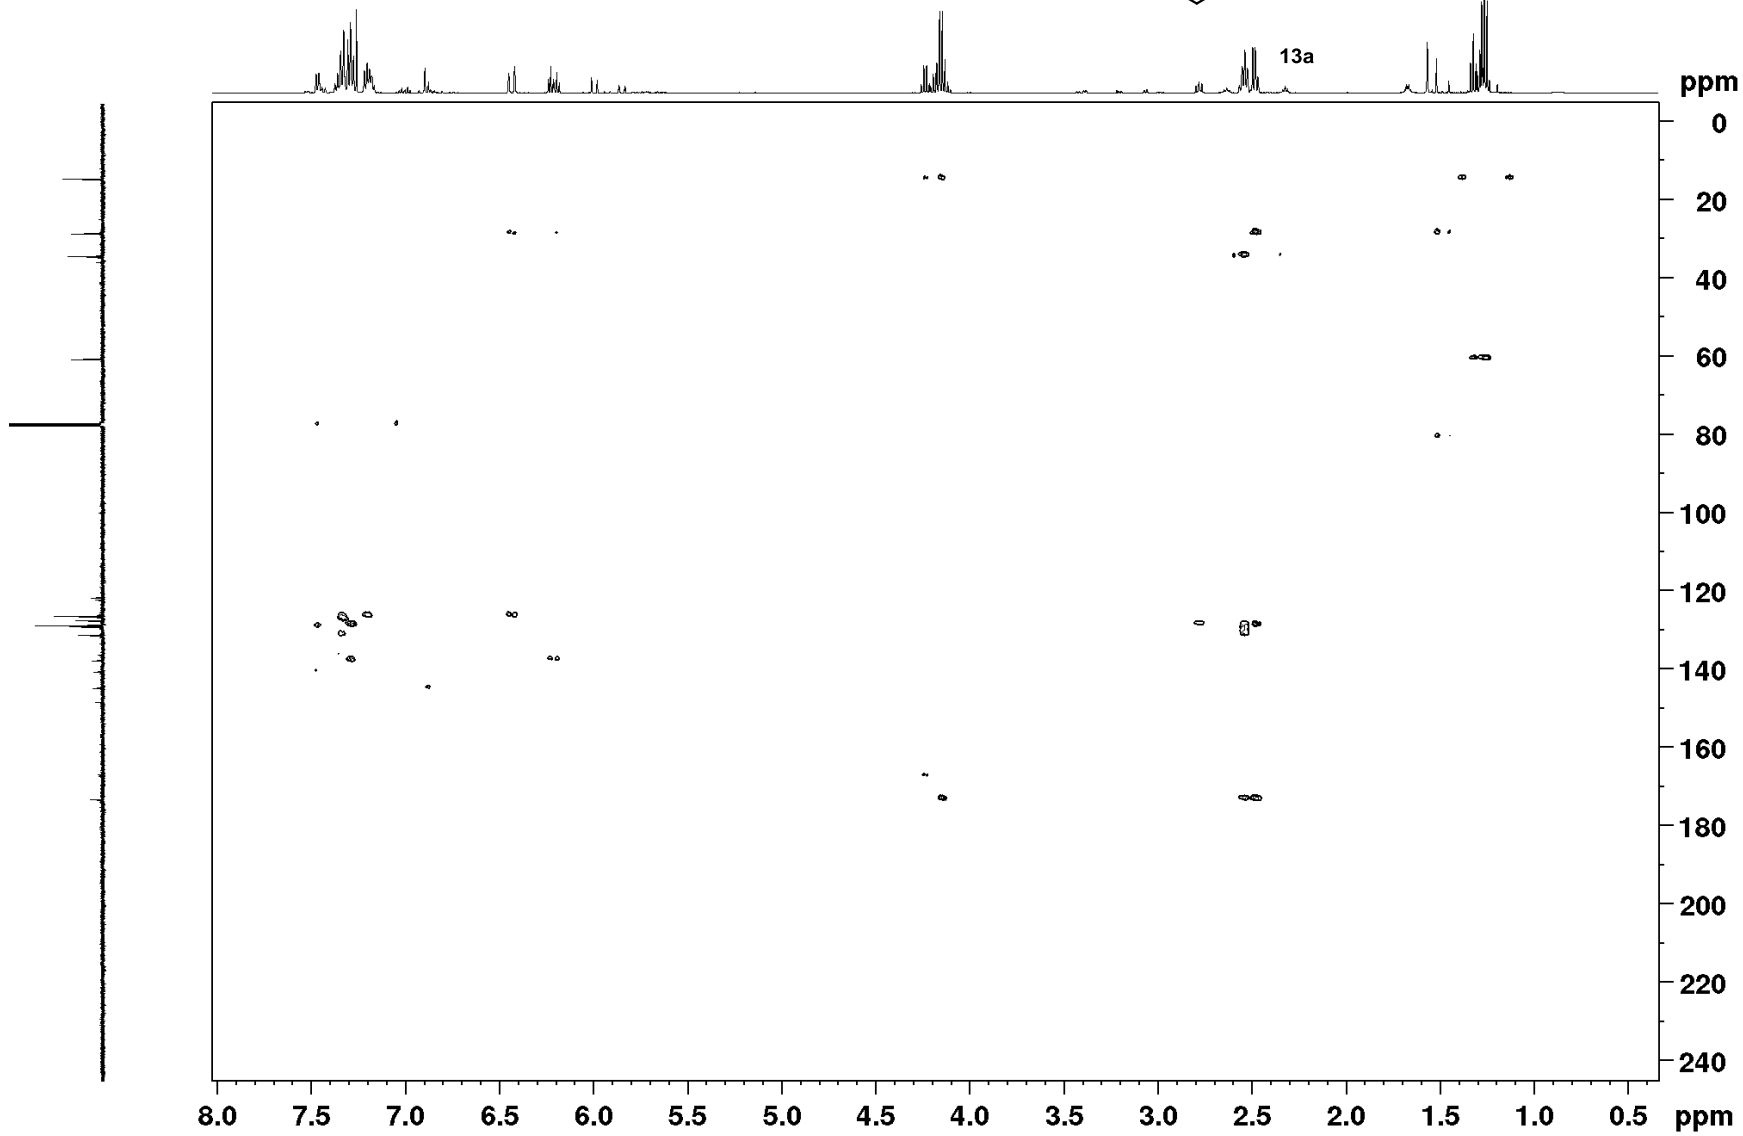

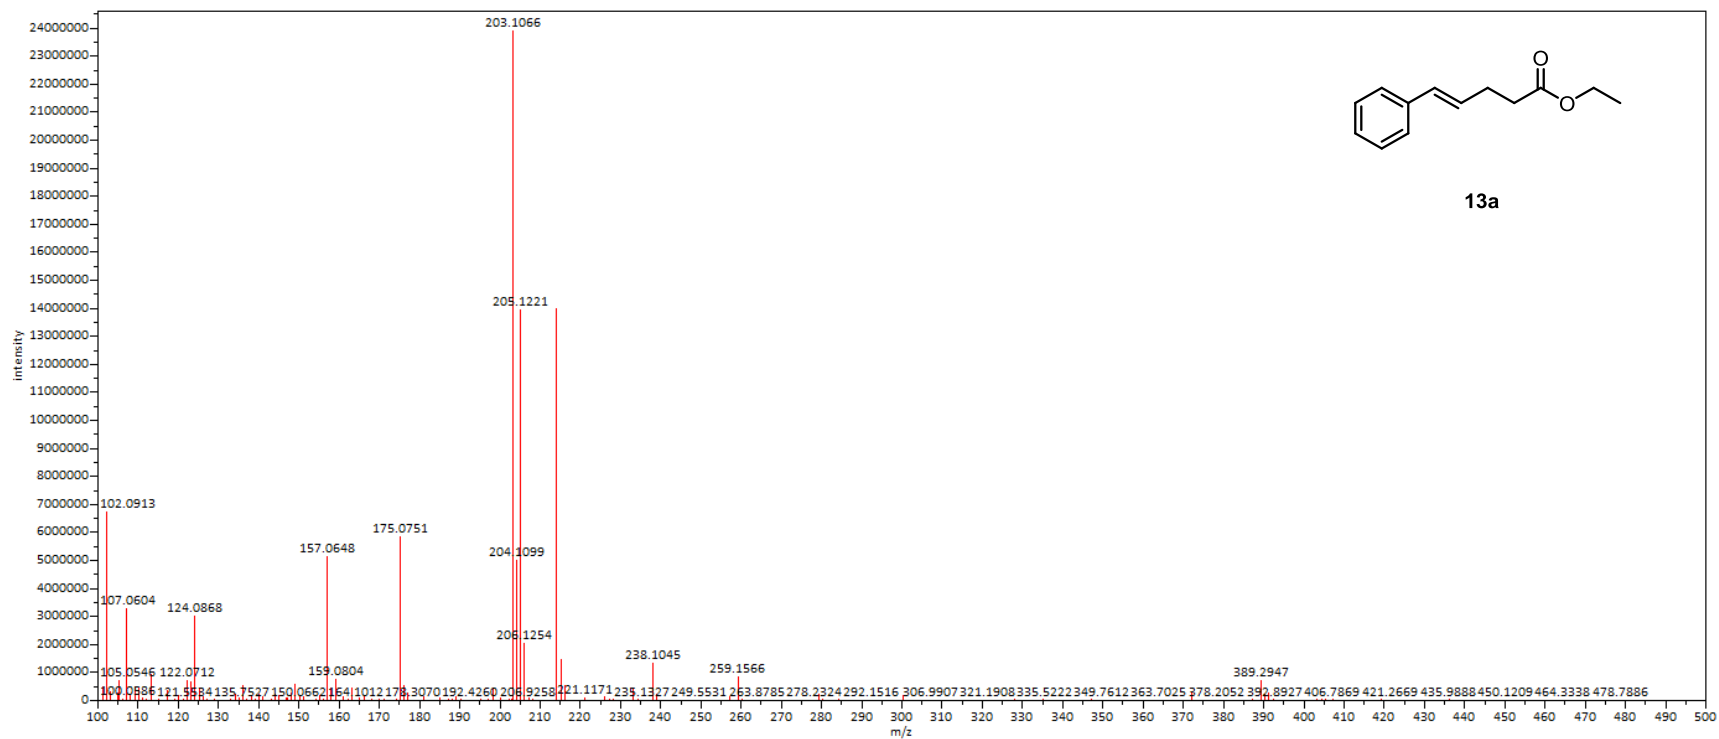



# Ethyl 3-(4-styrylphenyl)butanoate (S9)

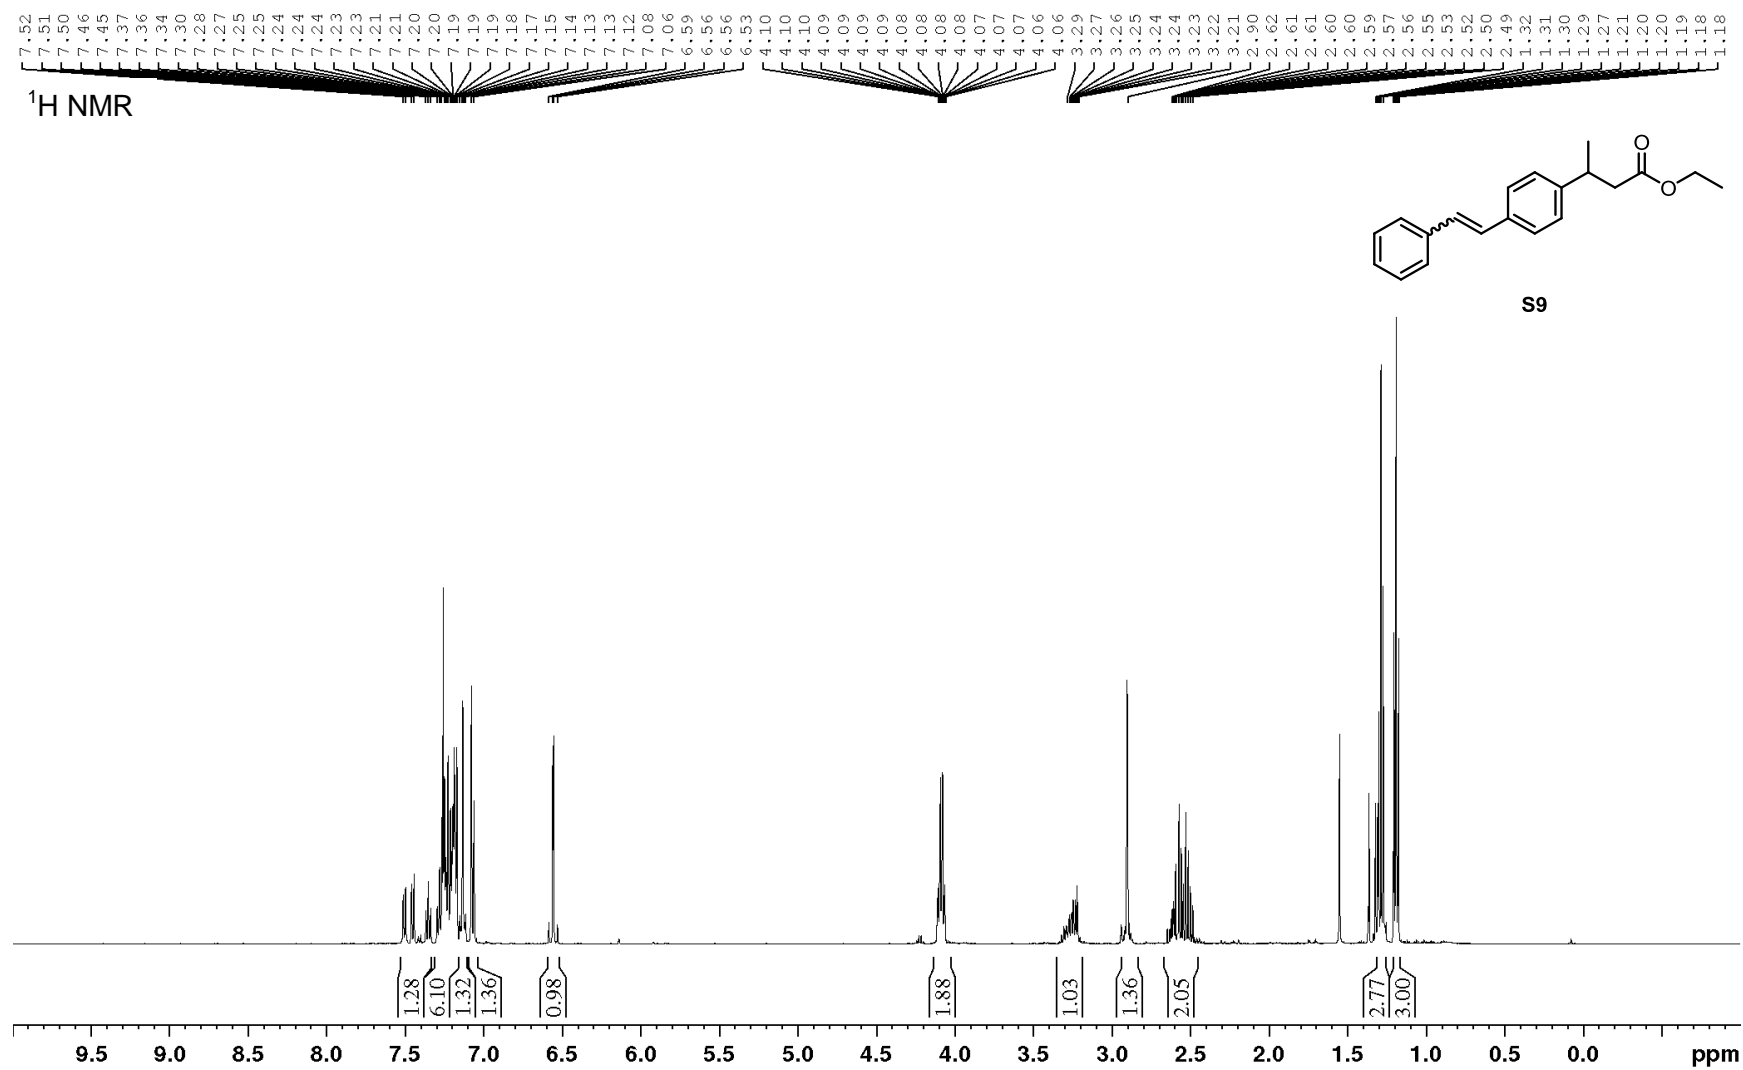

Ethyl 3-phenylbutanoate-2,3- $d_n$  (2- $d_n$ )

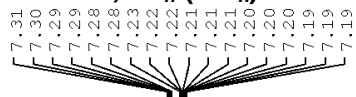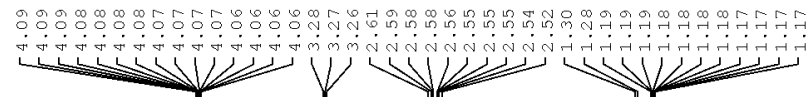

quant.  $^1\text{H}$  NMR

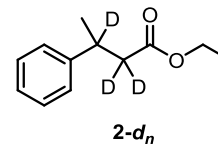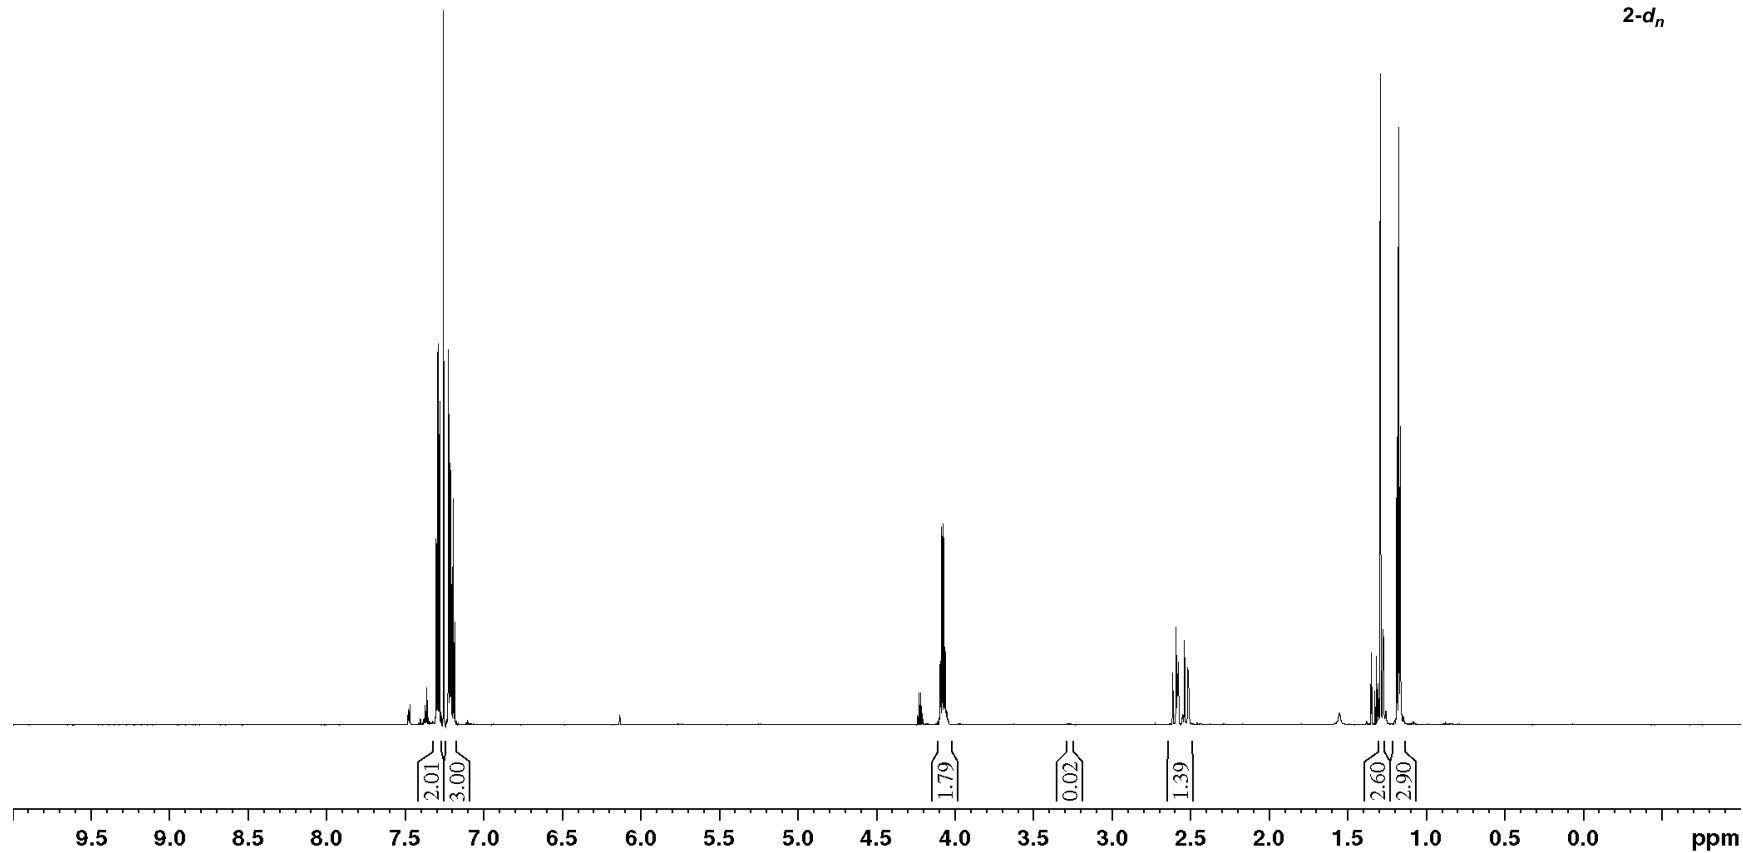

$^1\text{H}$  NMR

7.31  
7.31  
7.30  
7.28  
7.28  
7.23  
7.23  
7.22  
7.21  
7.21  
7.21  
7.20  
7.20  
7.19  
7.19  
7.18  
7.18

4.10  
4.08  
4.07  
4.06

3.30  
3.29  
3.27  
3.26  
3.24

2.62  
2.59  
2.58  
2.56  
2.55  
2.52

1.30  
1.28  
1.19  
1.18  
1.18  
1.17  
1.16

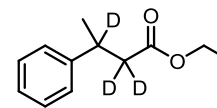

**2-d<sub>n</sub>**

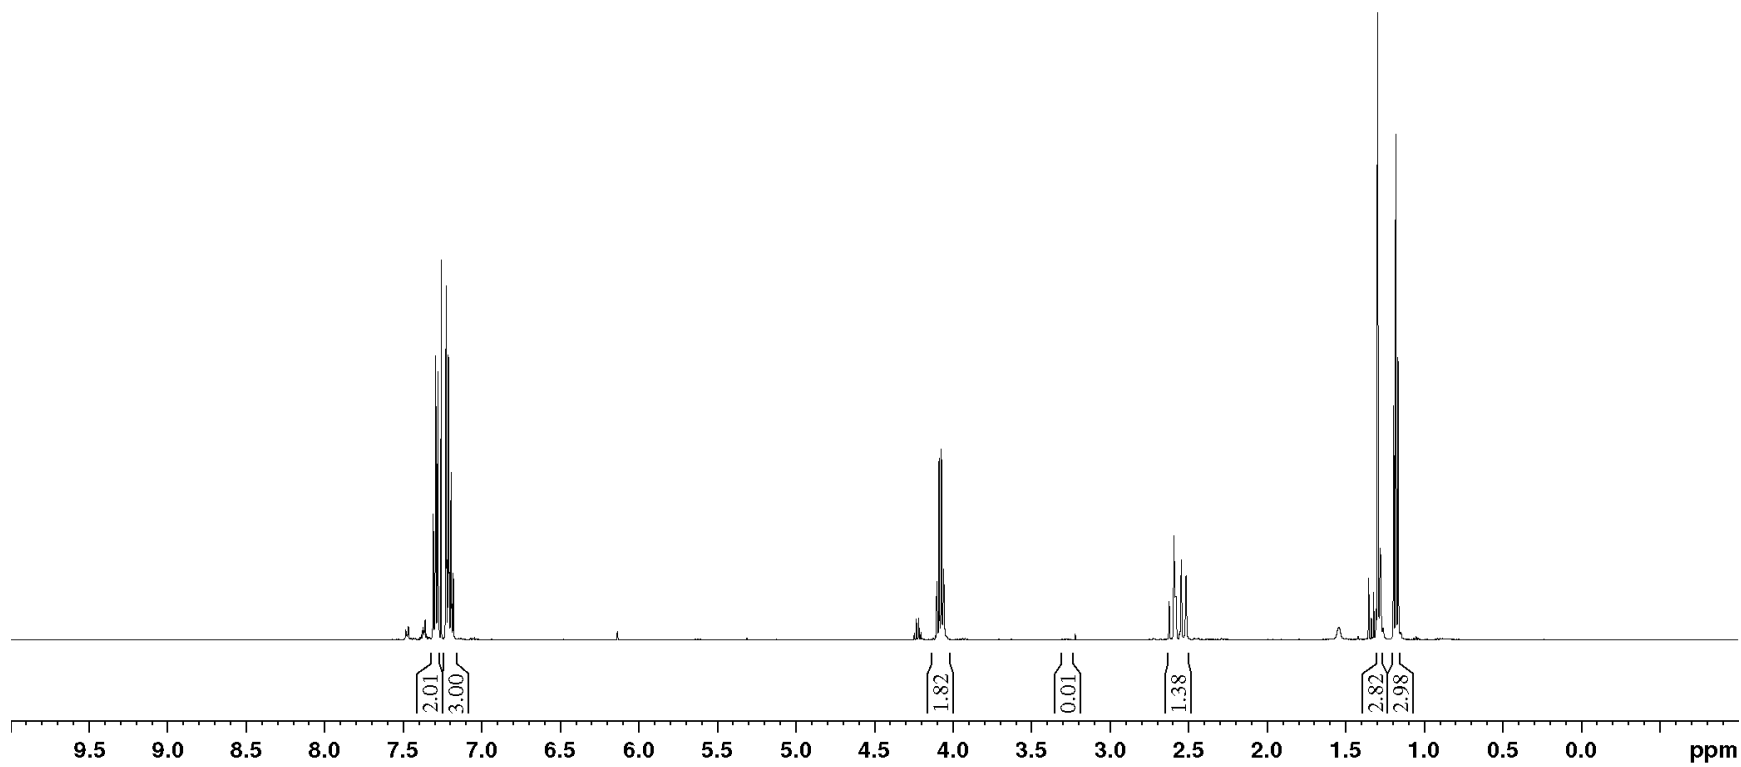

<sup>13</sup>C NMR

172.5

145.9

128.6  
126.9  
126.5

60.4

43.1

21.8

14.3

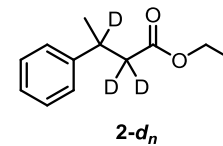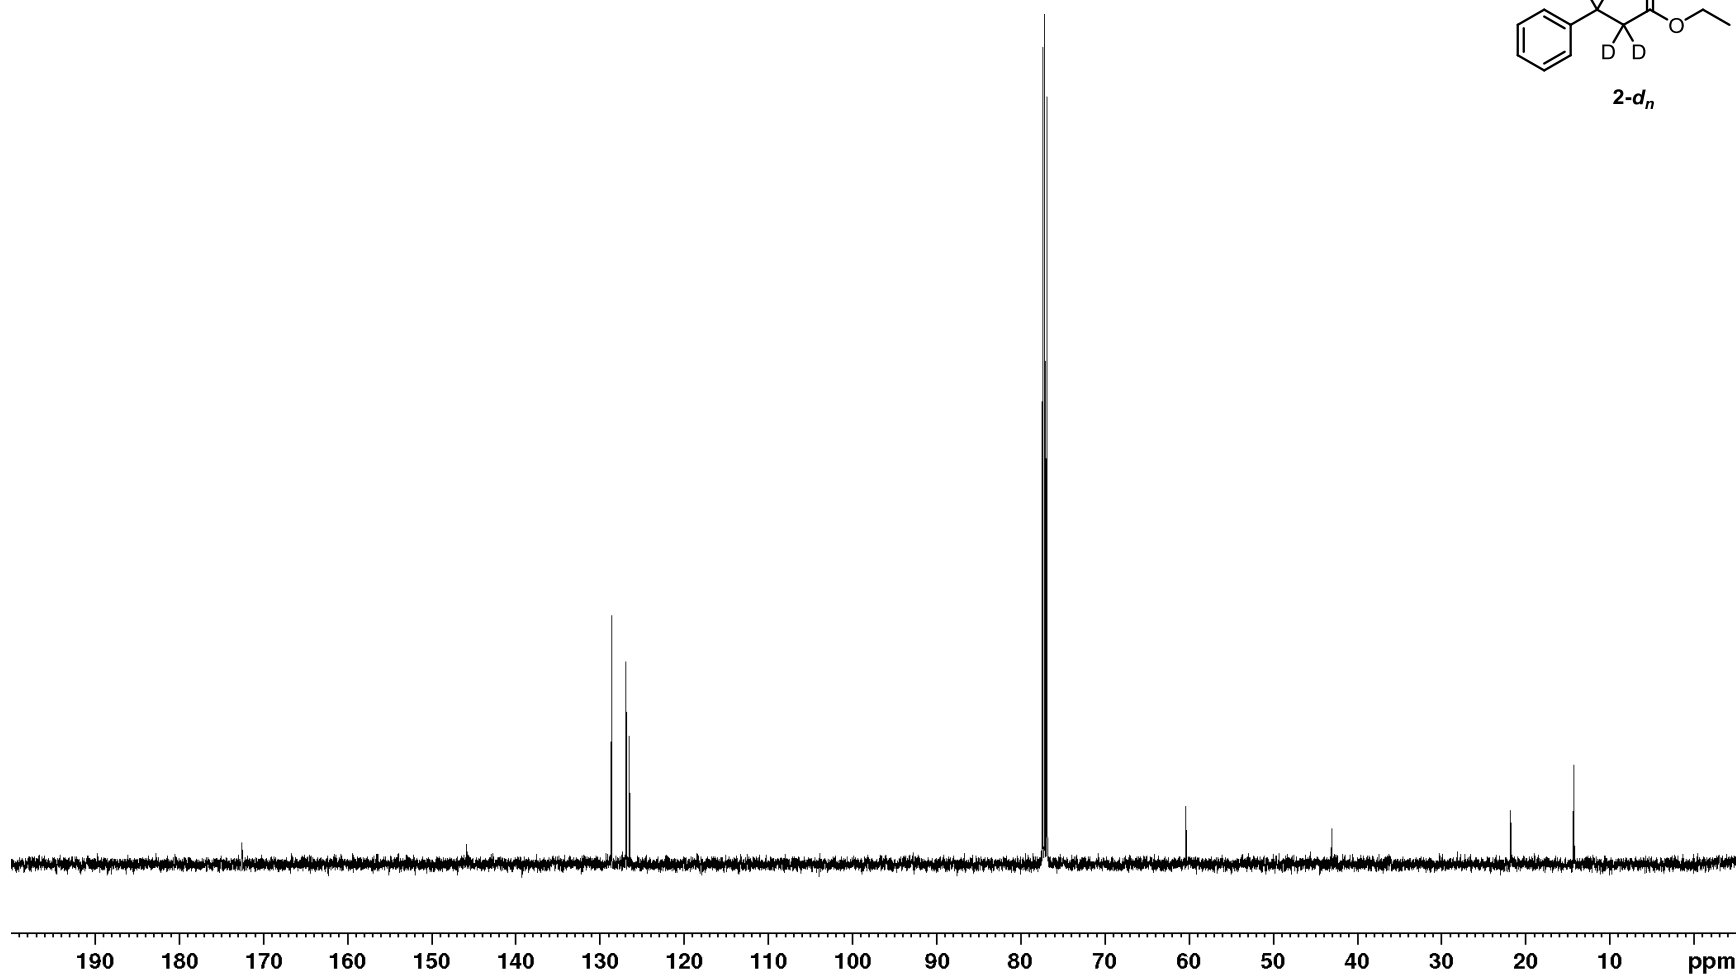

$^{13}\text{C}$  DEPT NMR

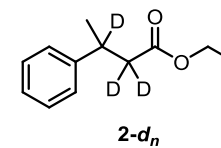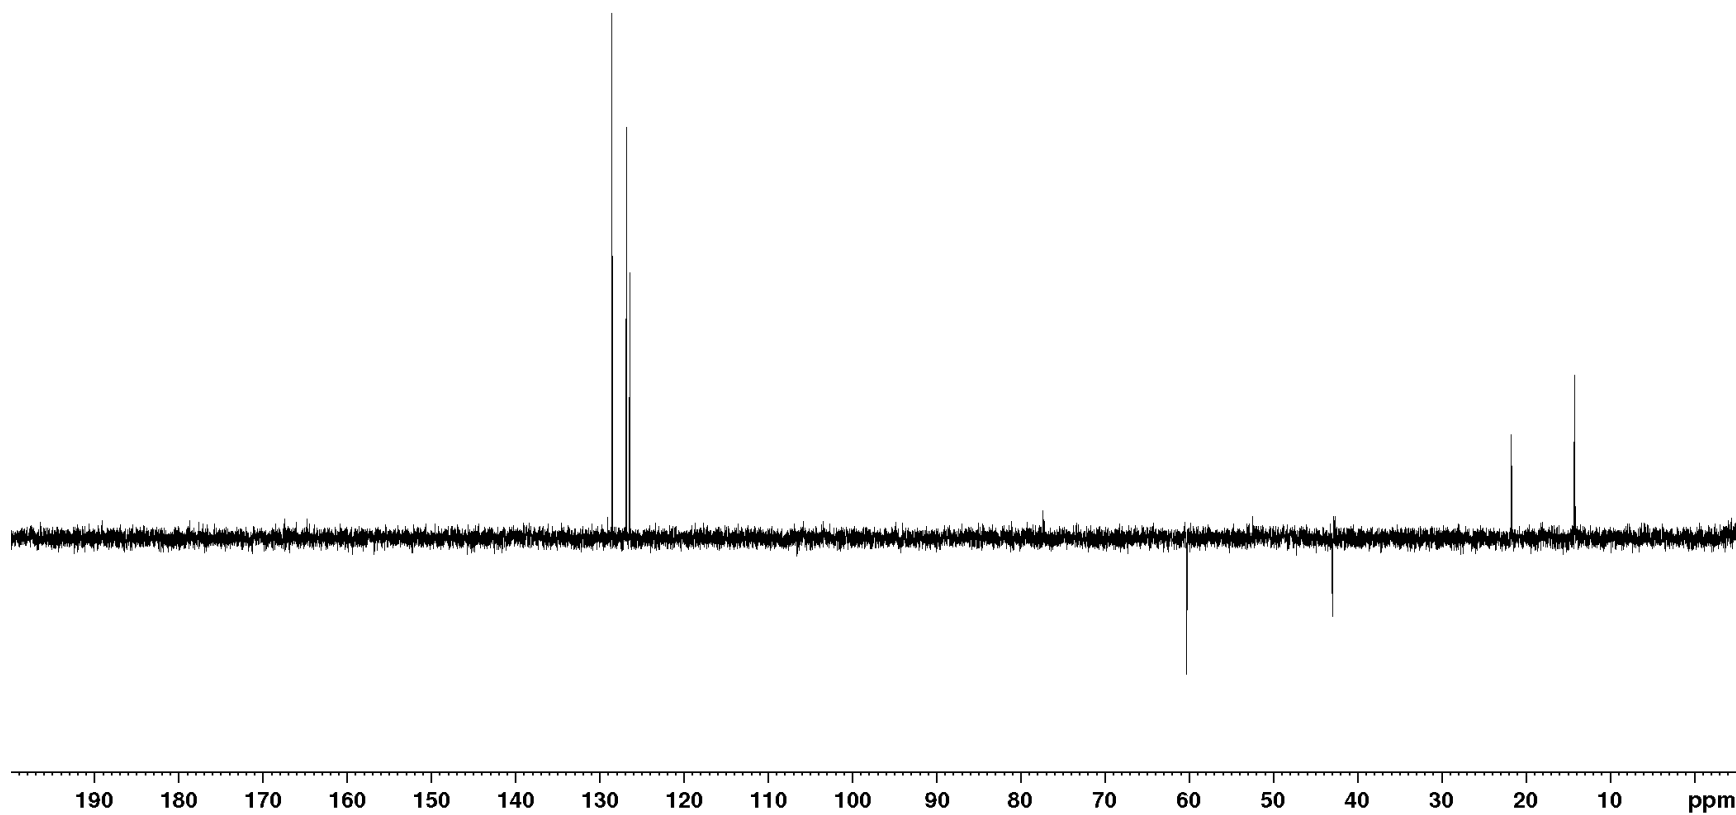

$^2\text{H}$  NMR

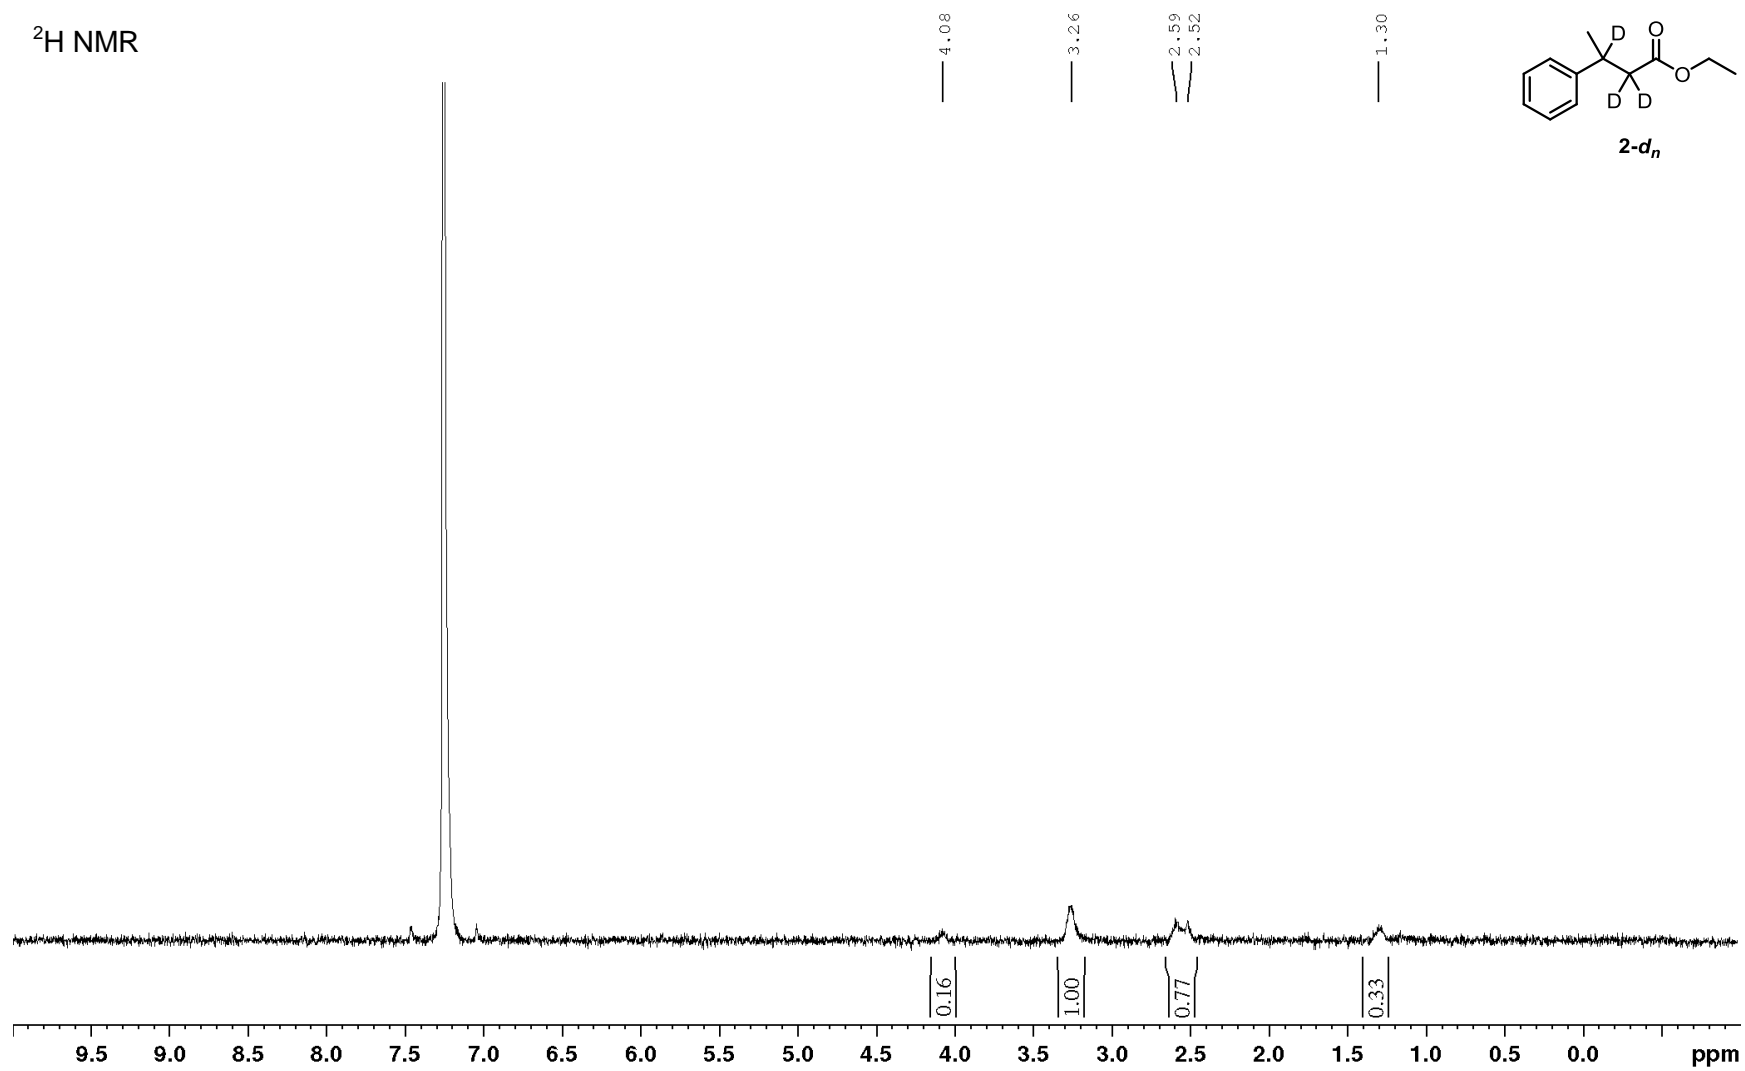

<sup>1</sup>H-<sup>1</sup>H COSY

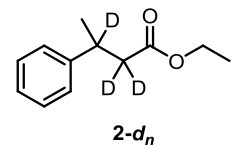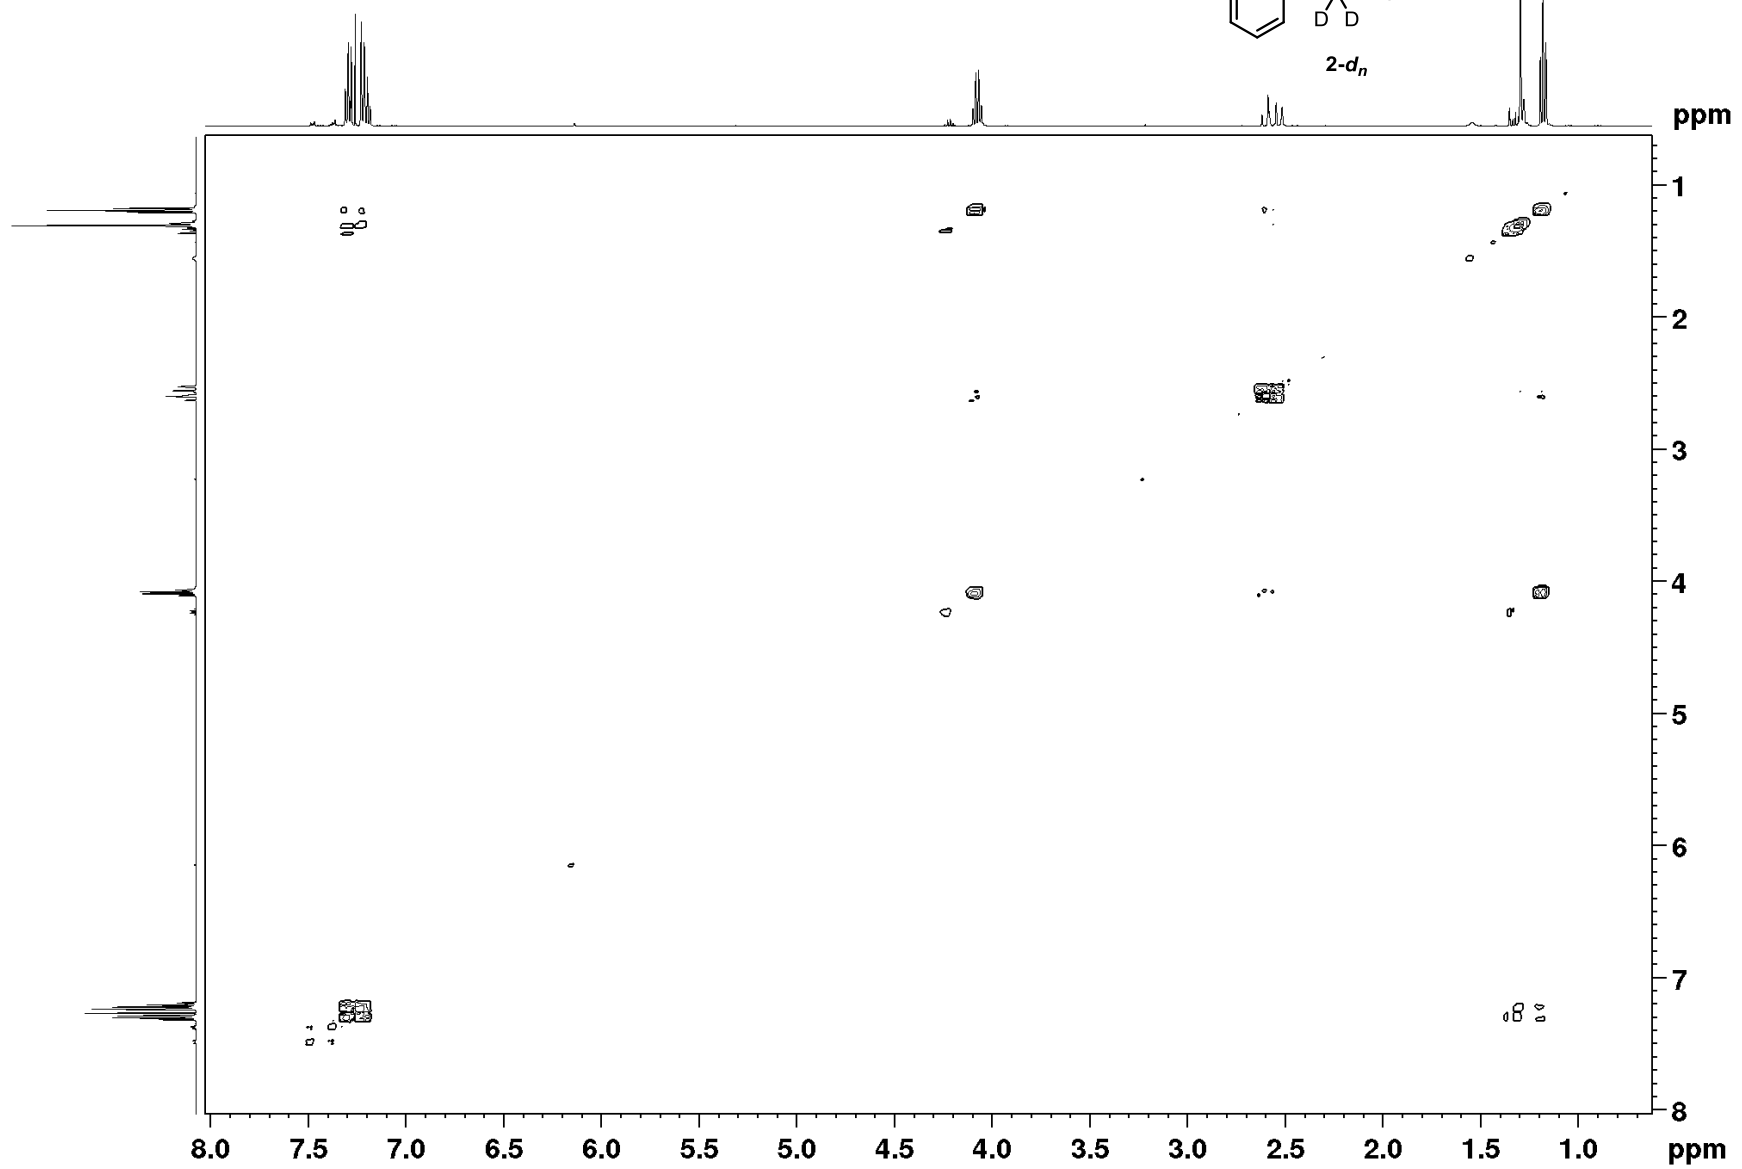

$^1\text{H}$ - $^{13}\text{C}$  HMQC

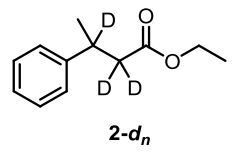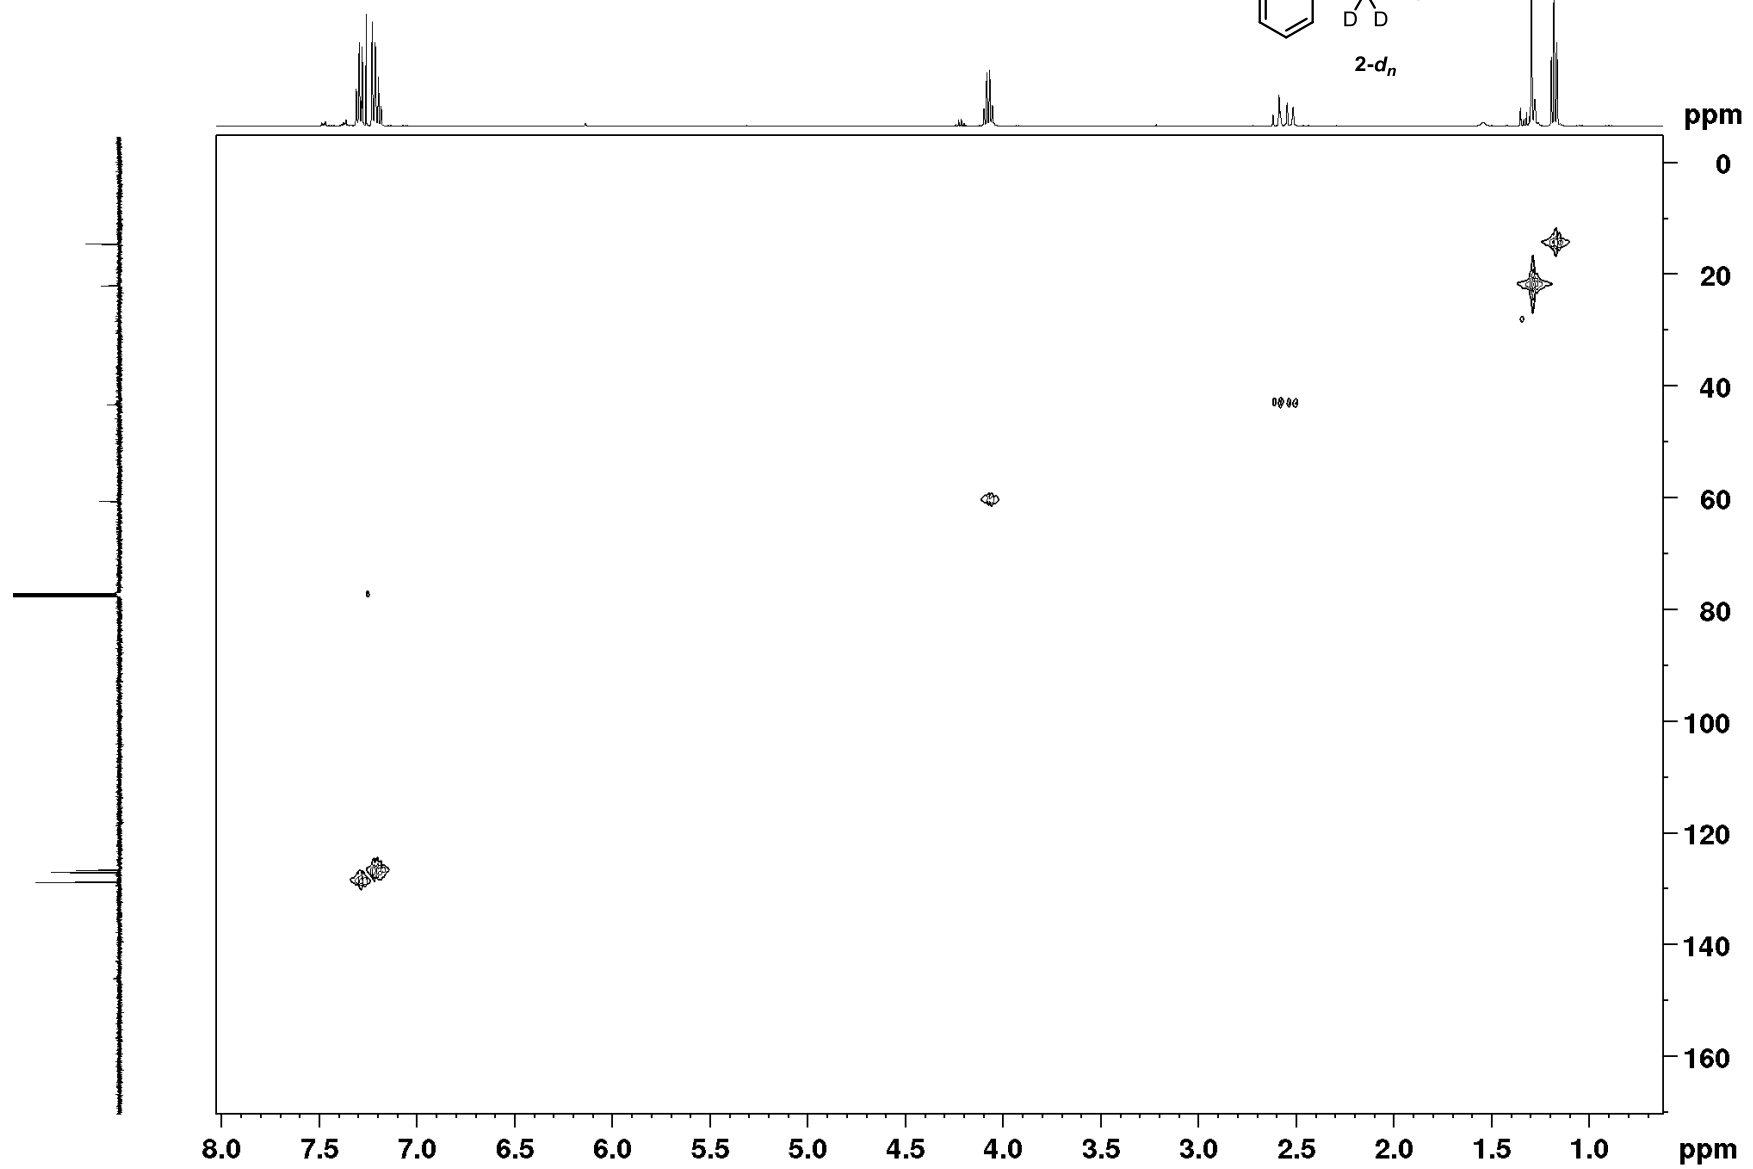

S300



$^1\text{H}$ - $^{13}\text{C}$  HMBC

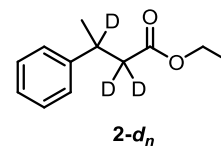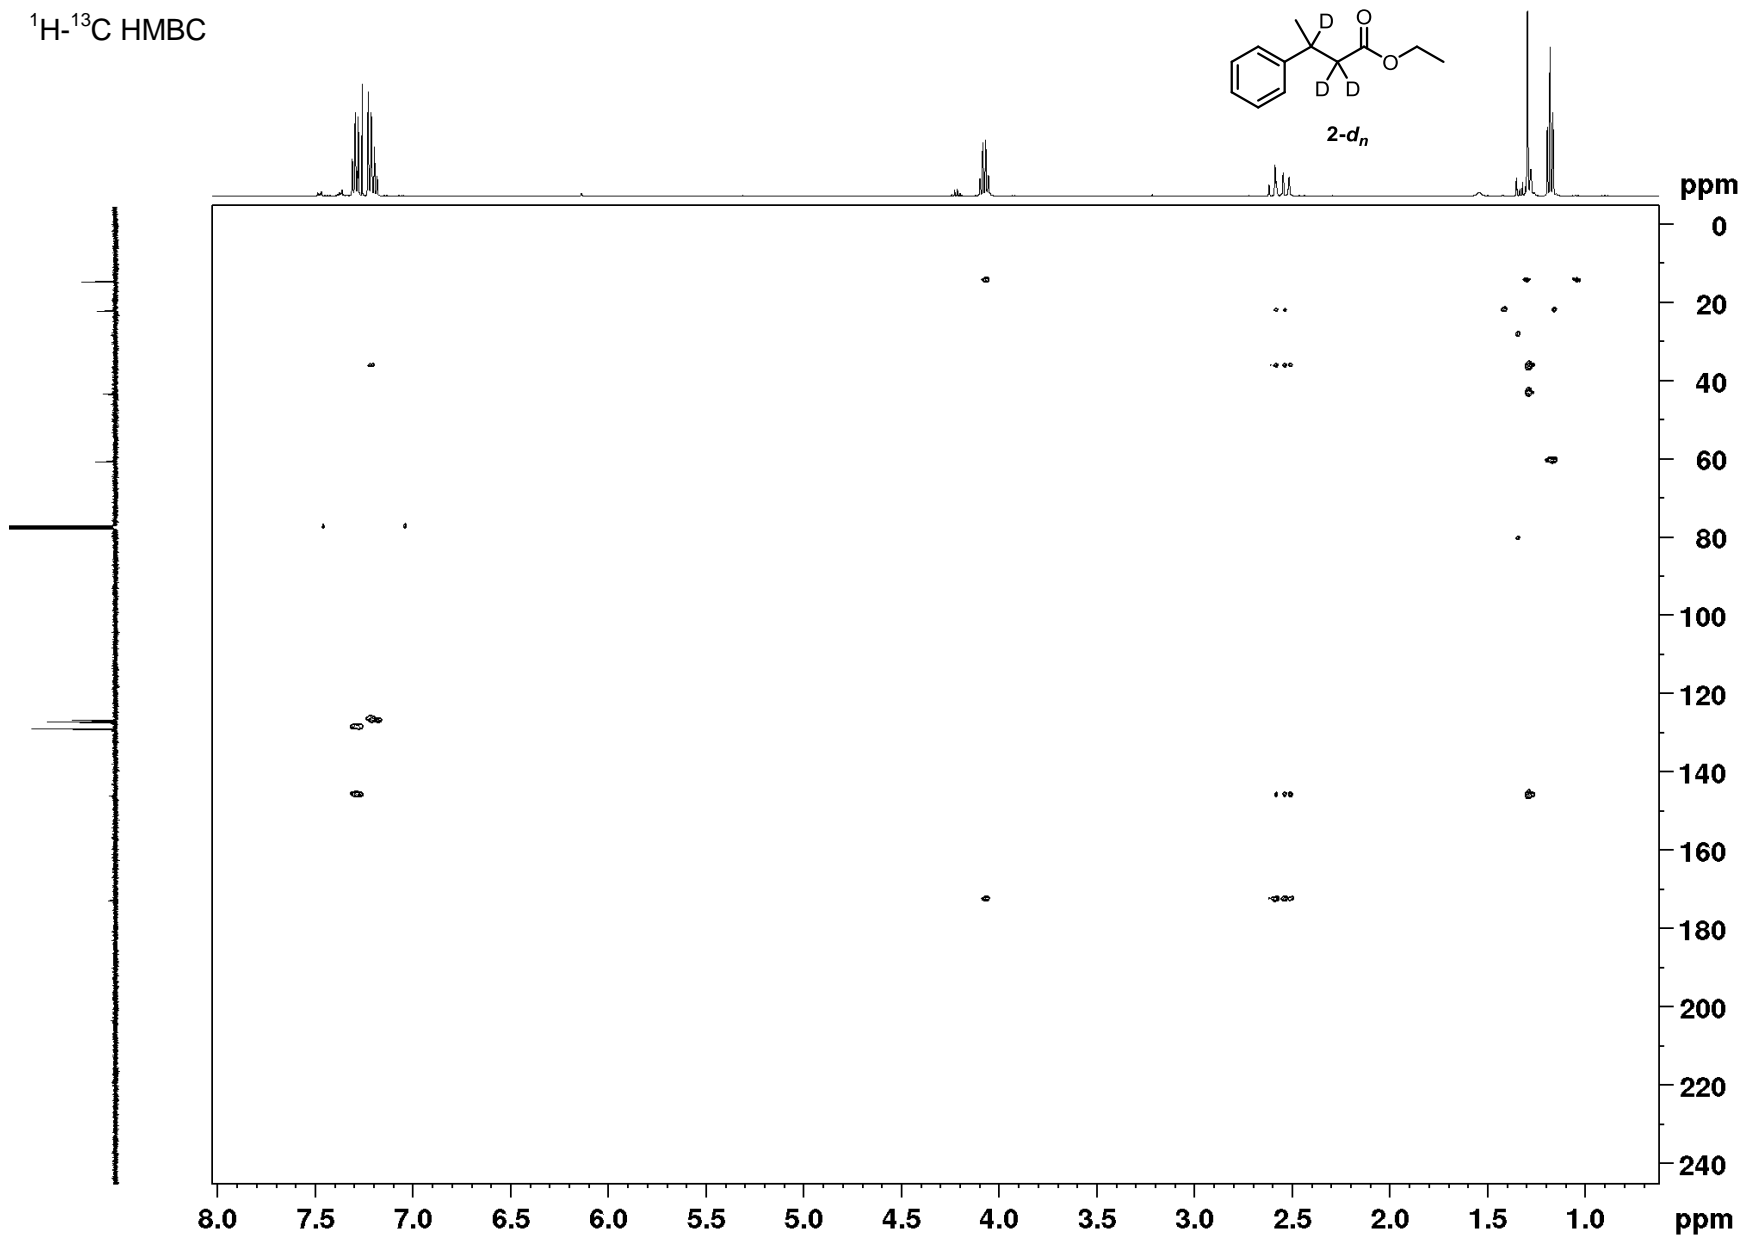

S301

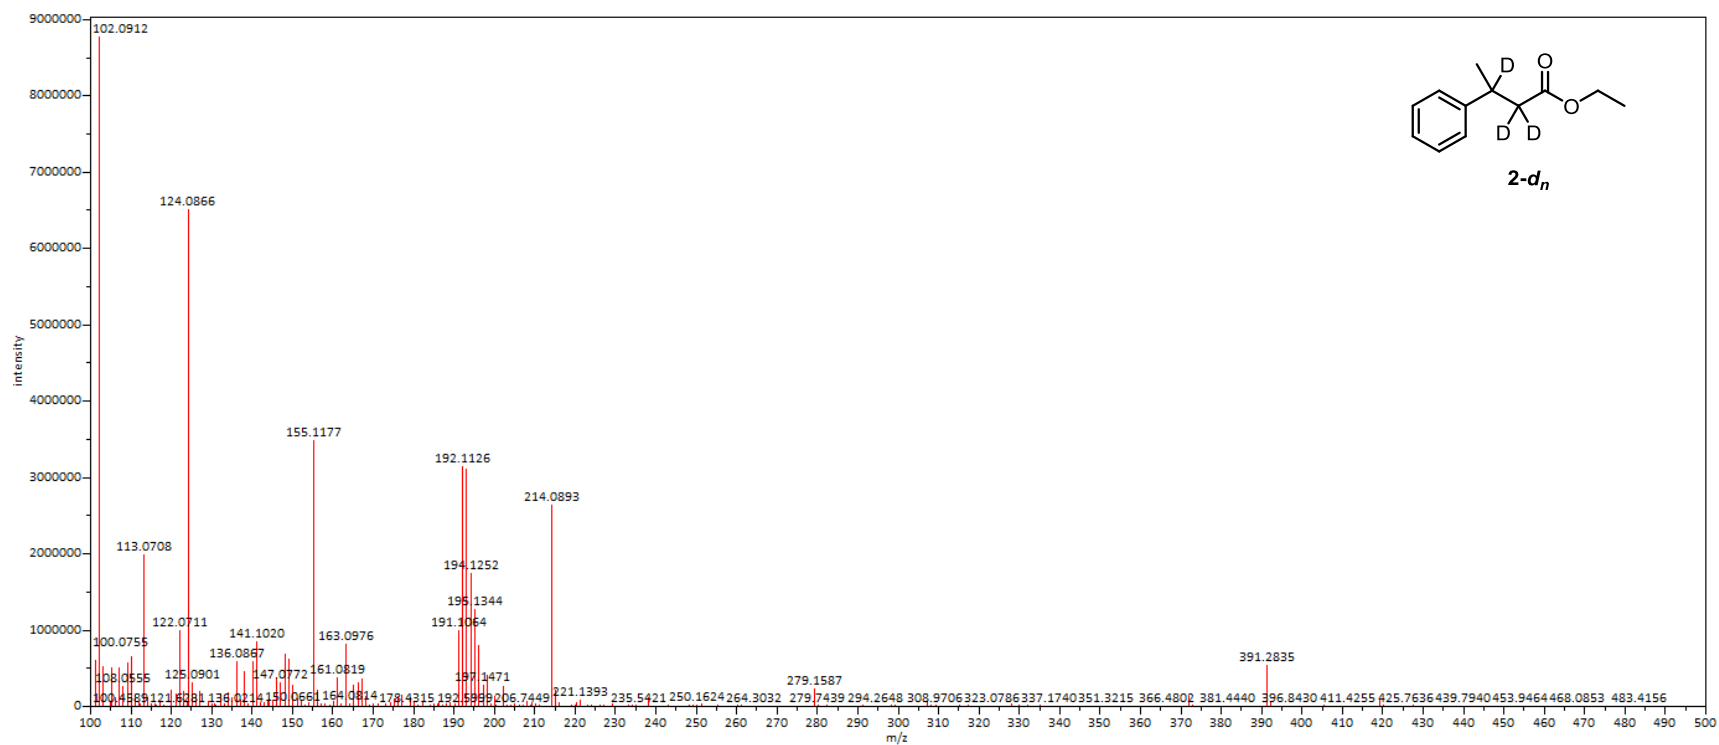

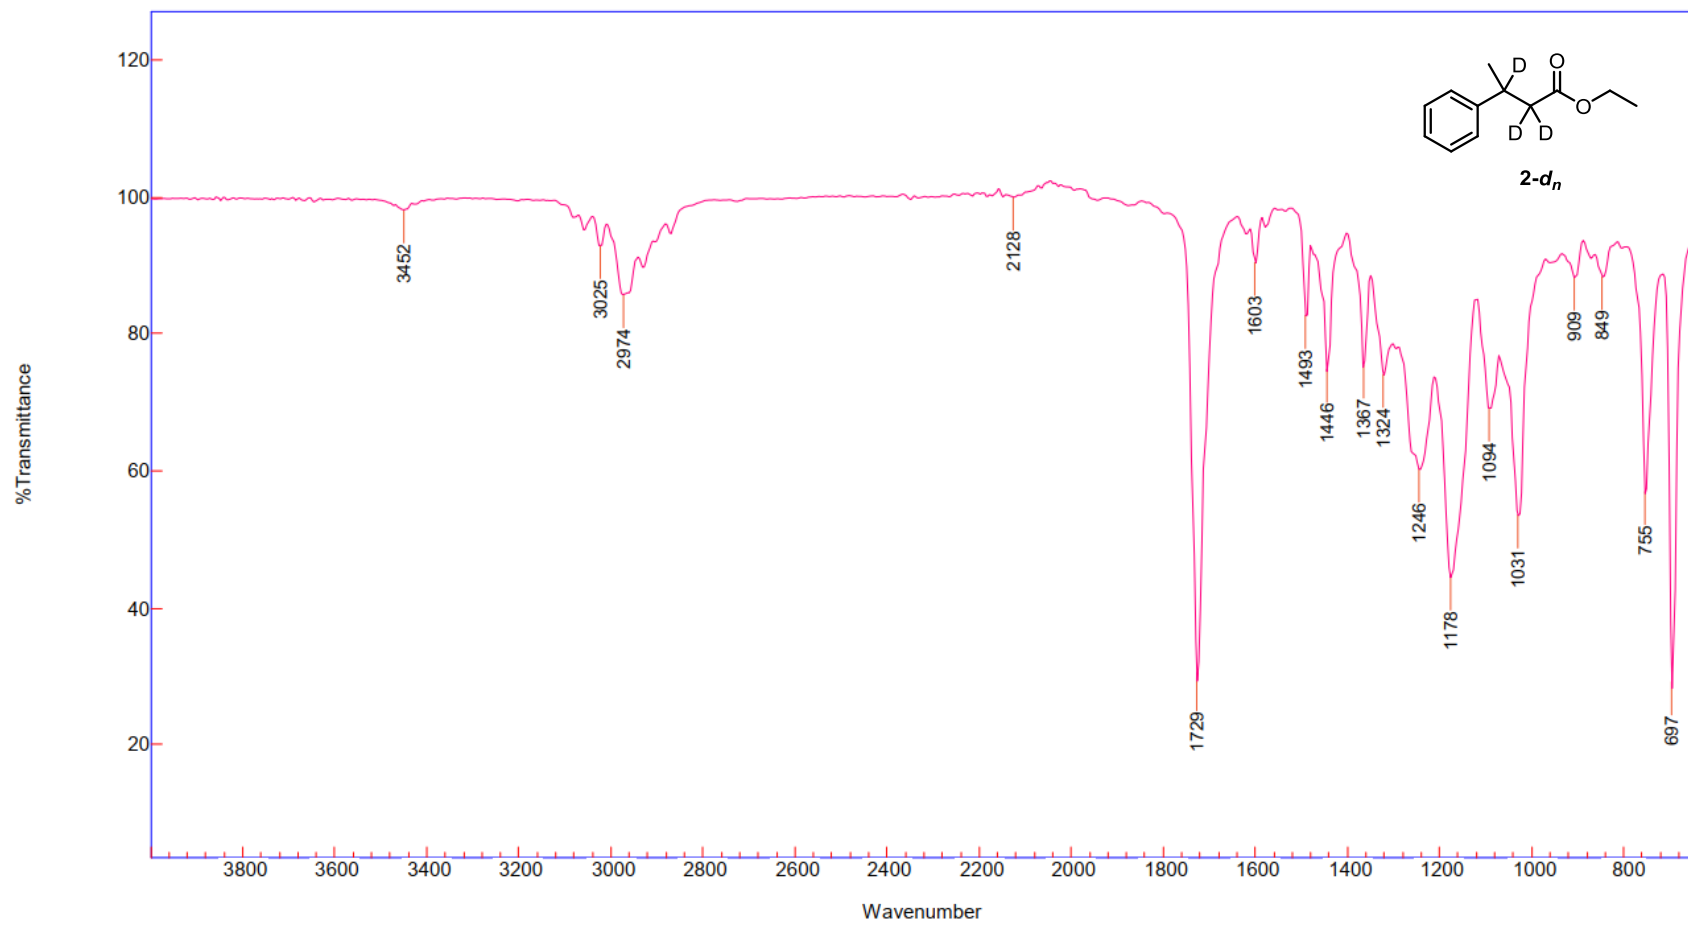

Ethyl 3,3-diphenylpropanoate-2,2,3-d<sub>n</sub> (9c-d<sub>n</sub>)

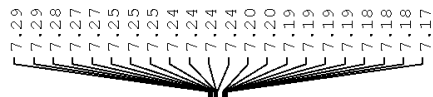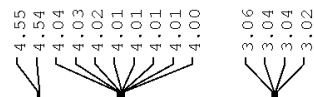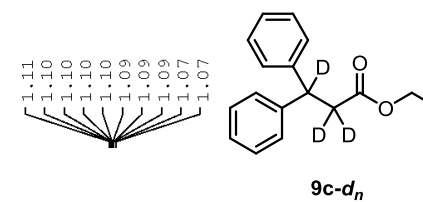

quant. <sup>1</sup>H NMR

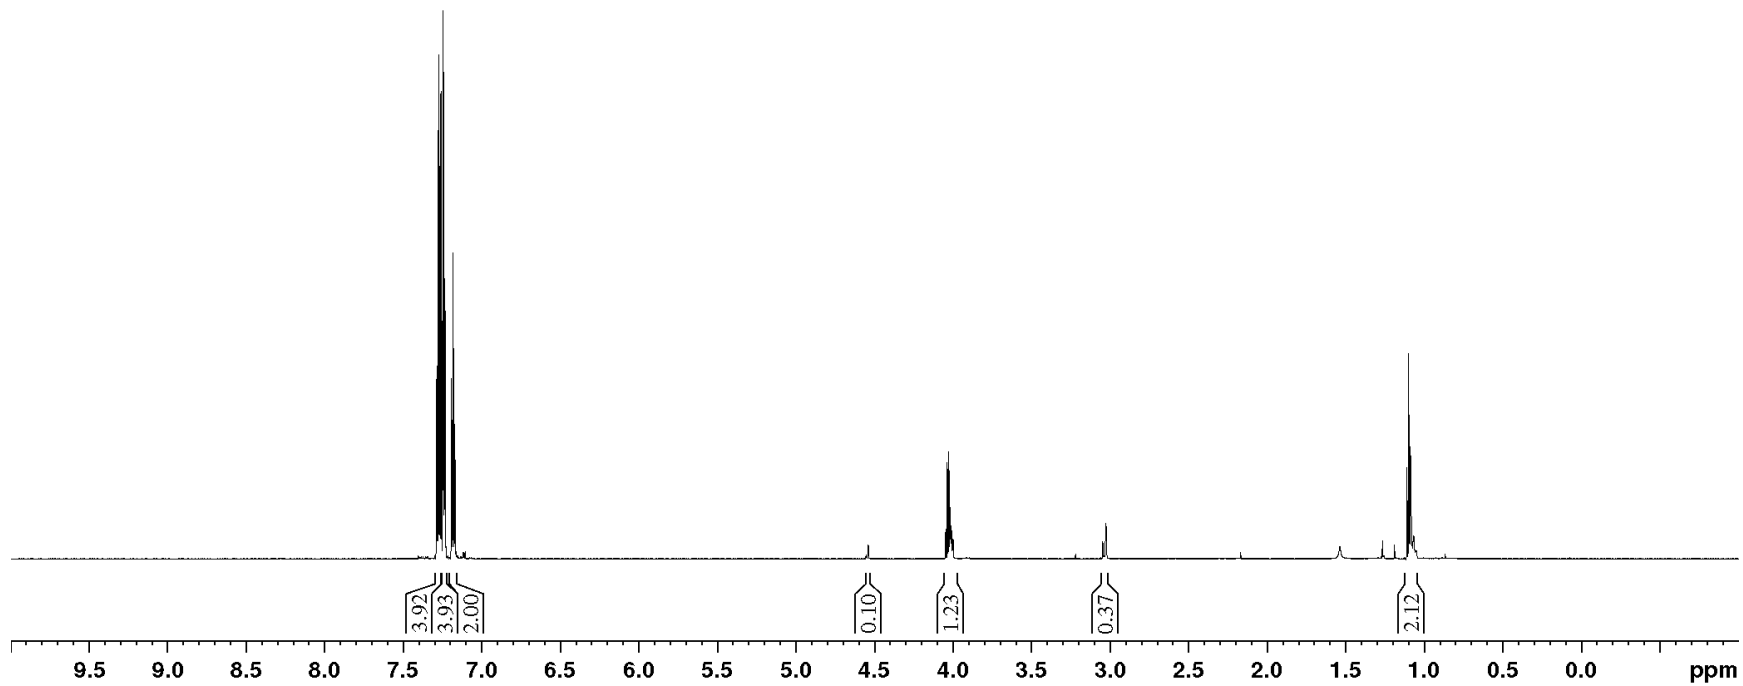

<sup>1</sup>H NMR

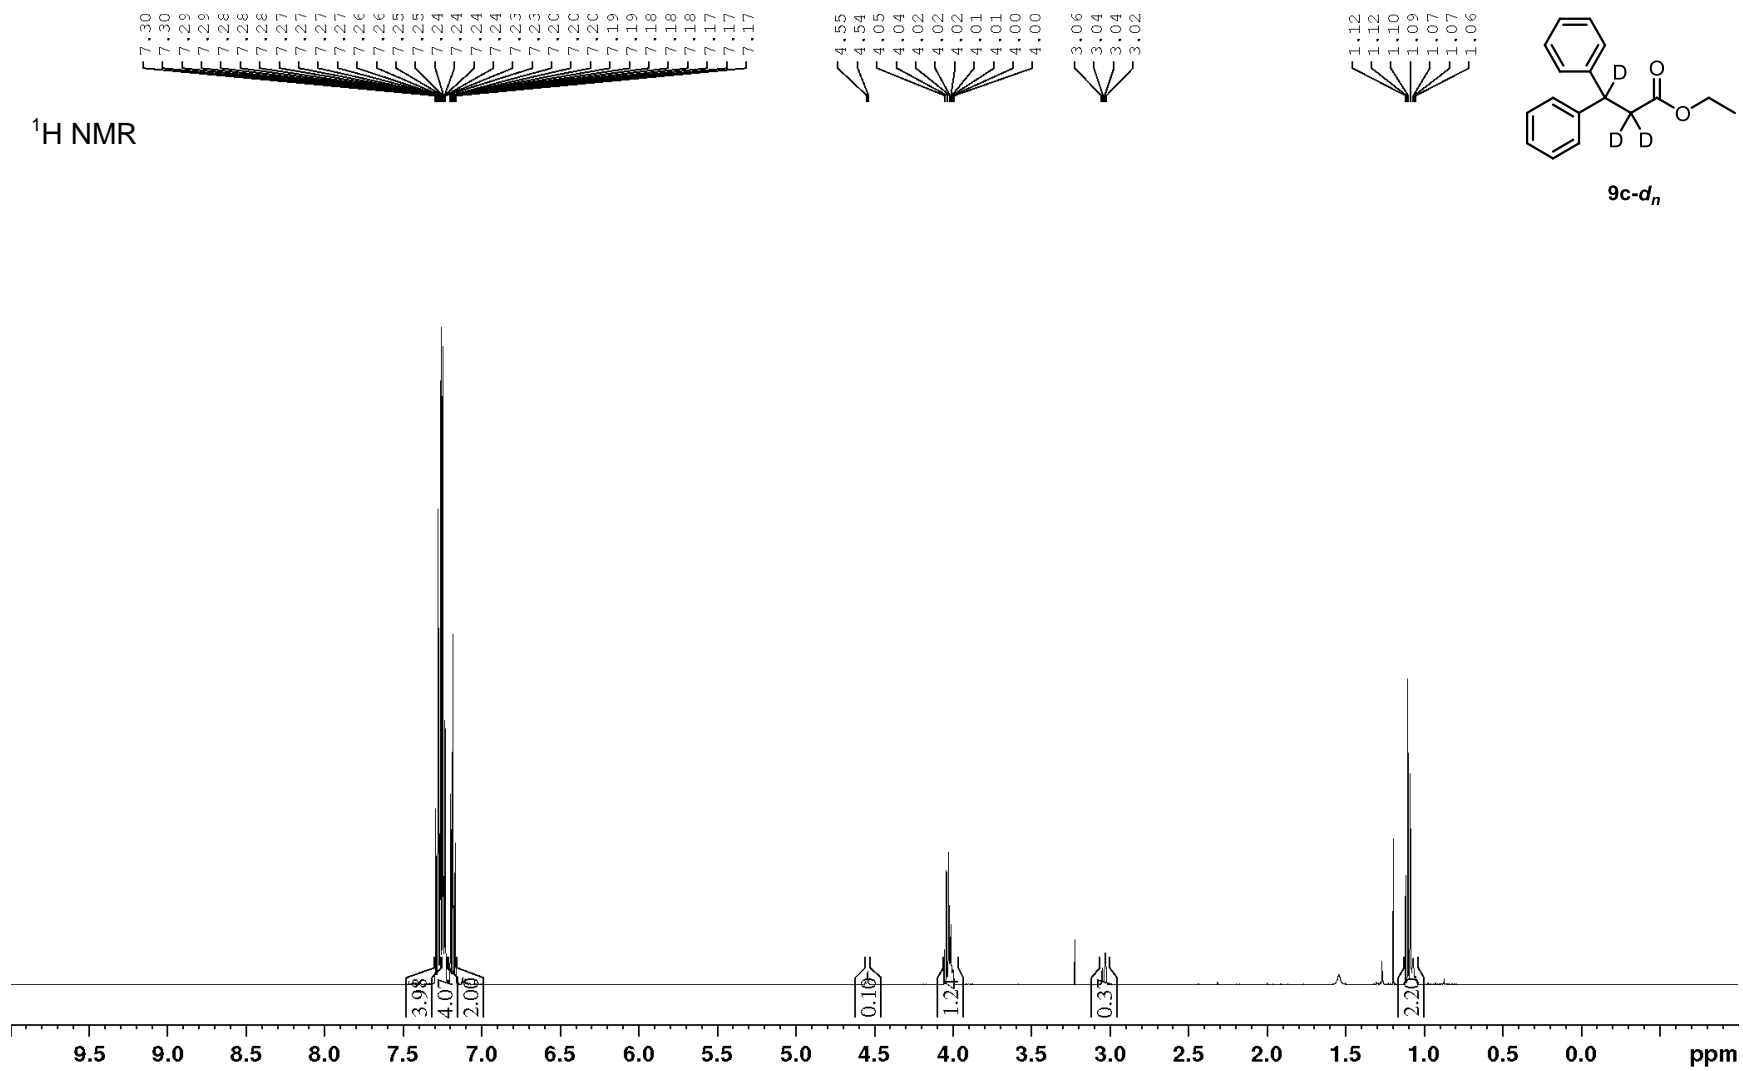

$^{13}\text{C}$  NMR

172.0

143.6

128.7

127.8

126.7

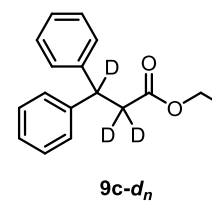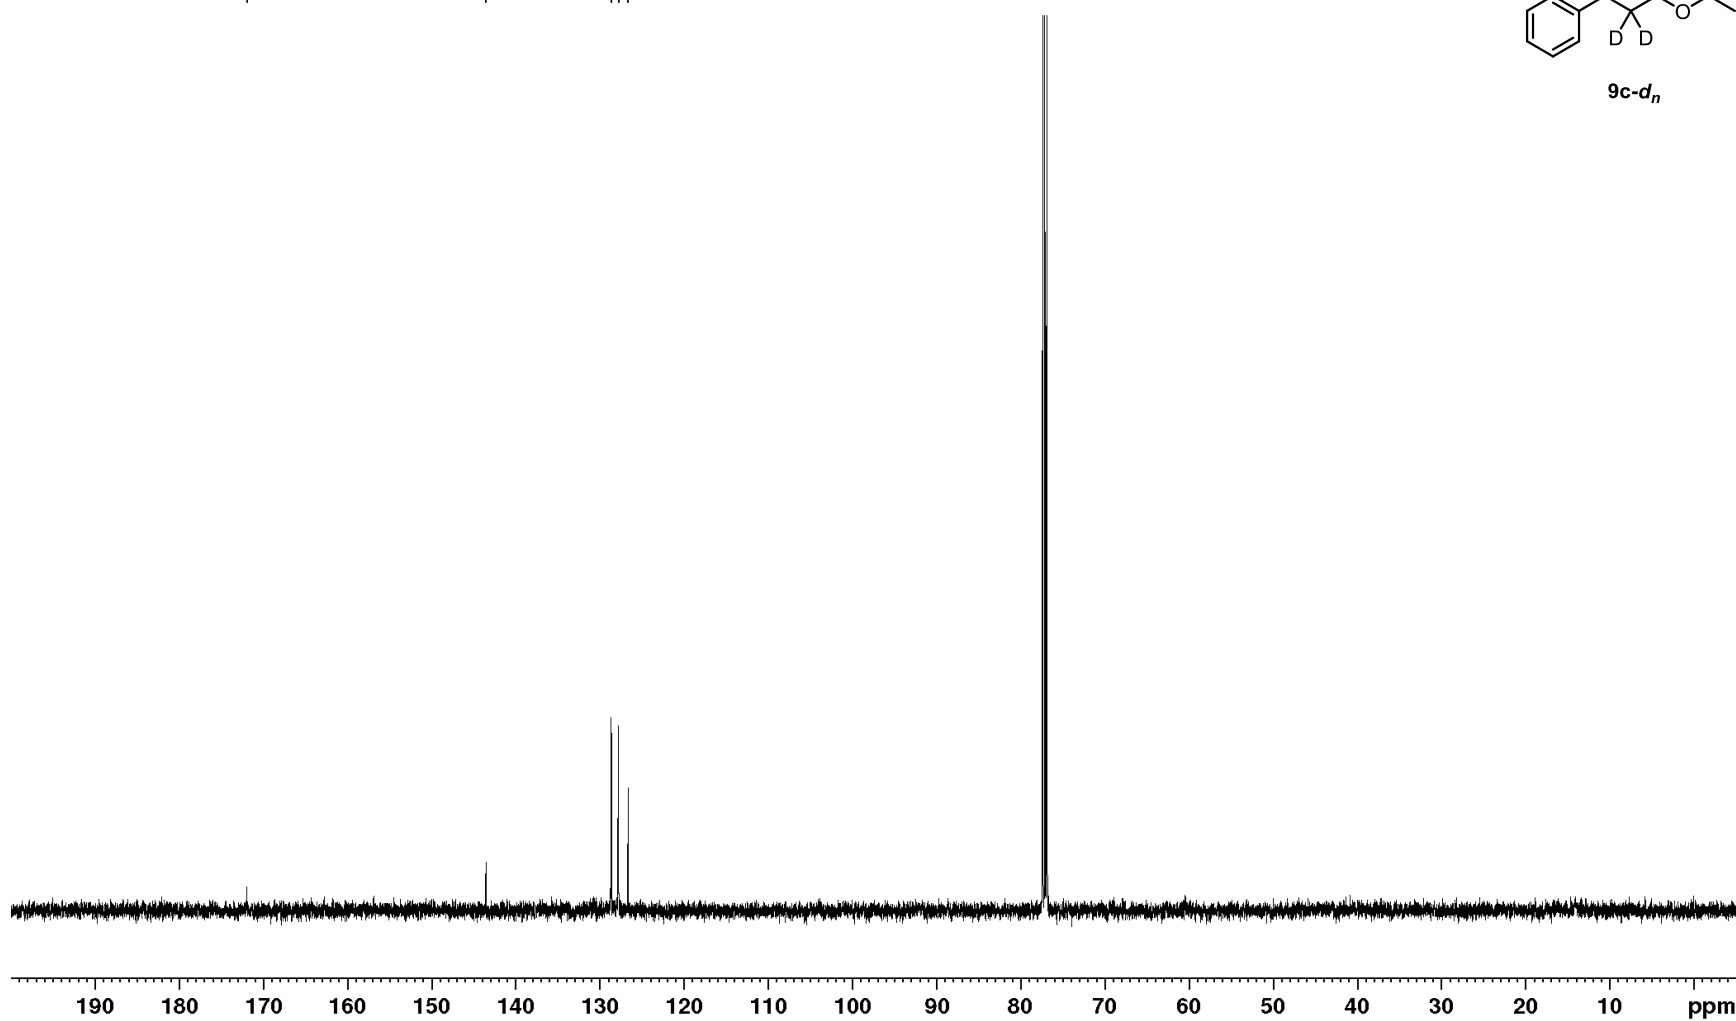

<sup>13</sup>C DEPT NMR

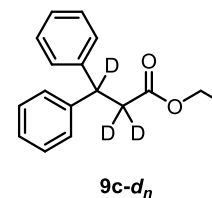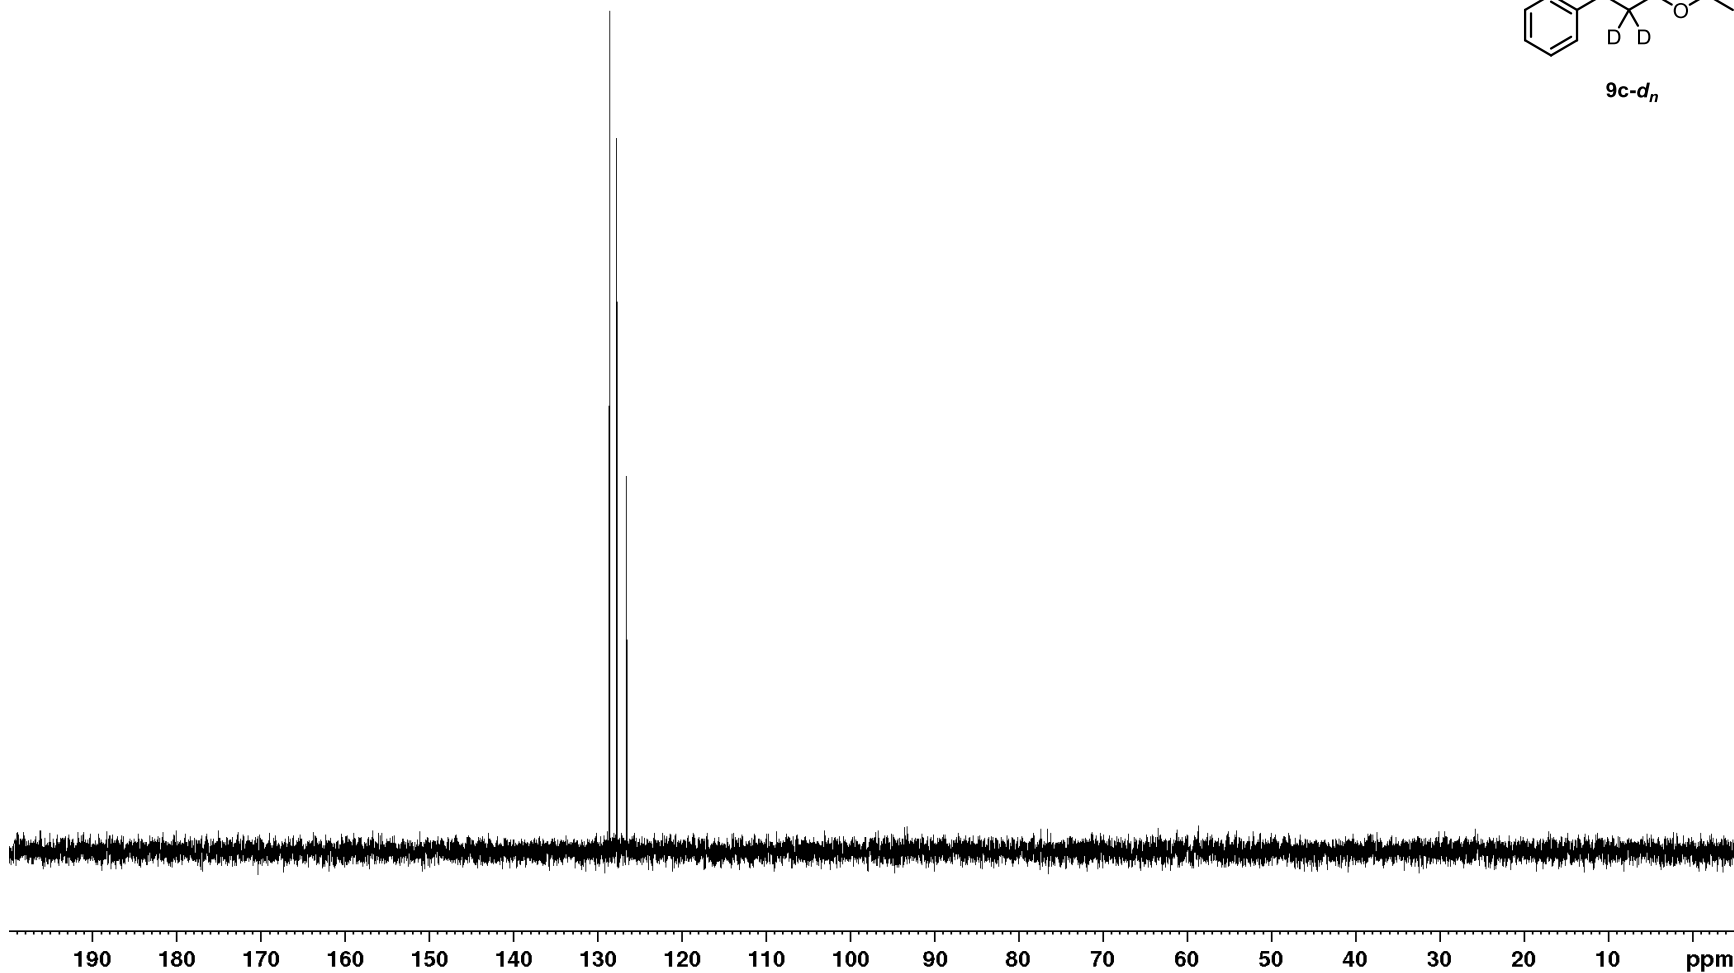

$^2\text{H}$  NMR

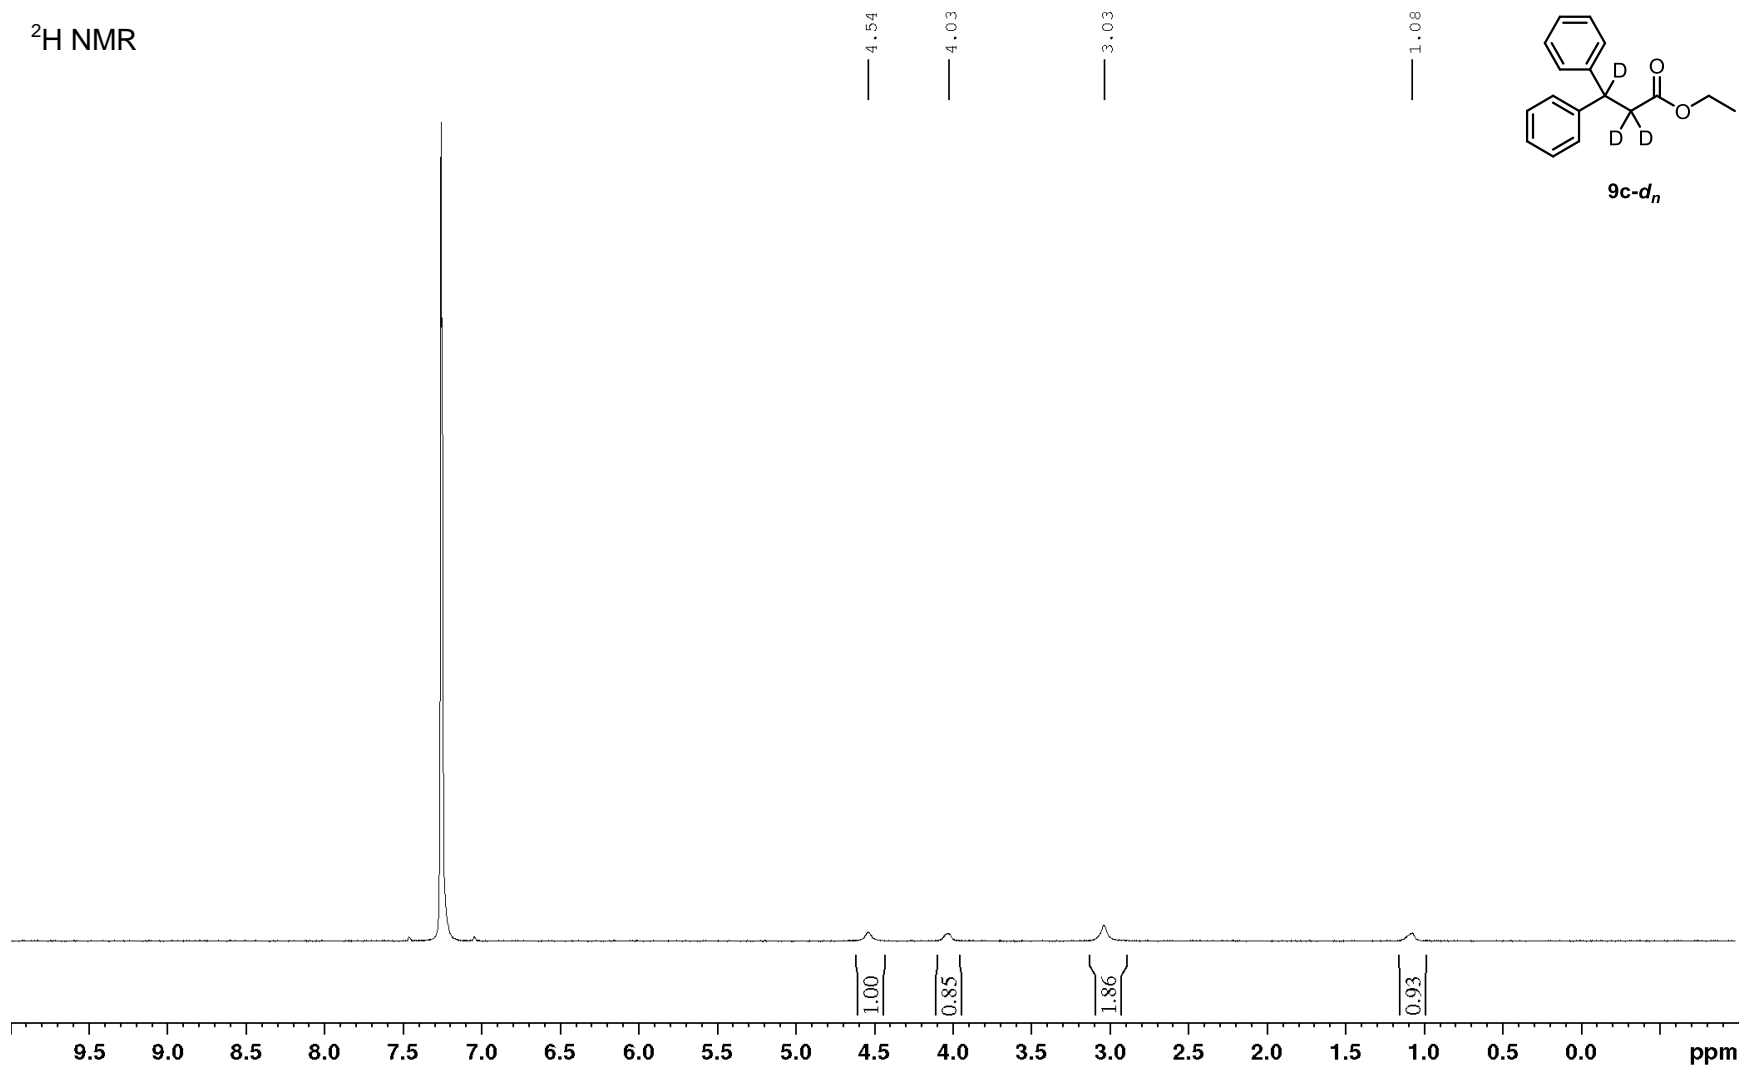



$^1\text{H}$ - $^1\text{H}$  COSY

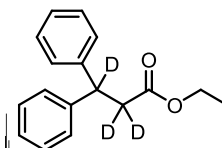

9c-d<sub>n</sub> ppm

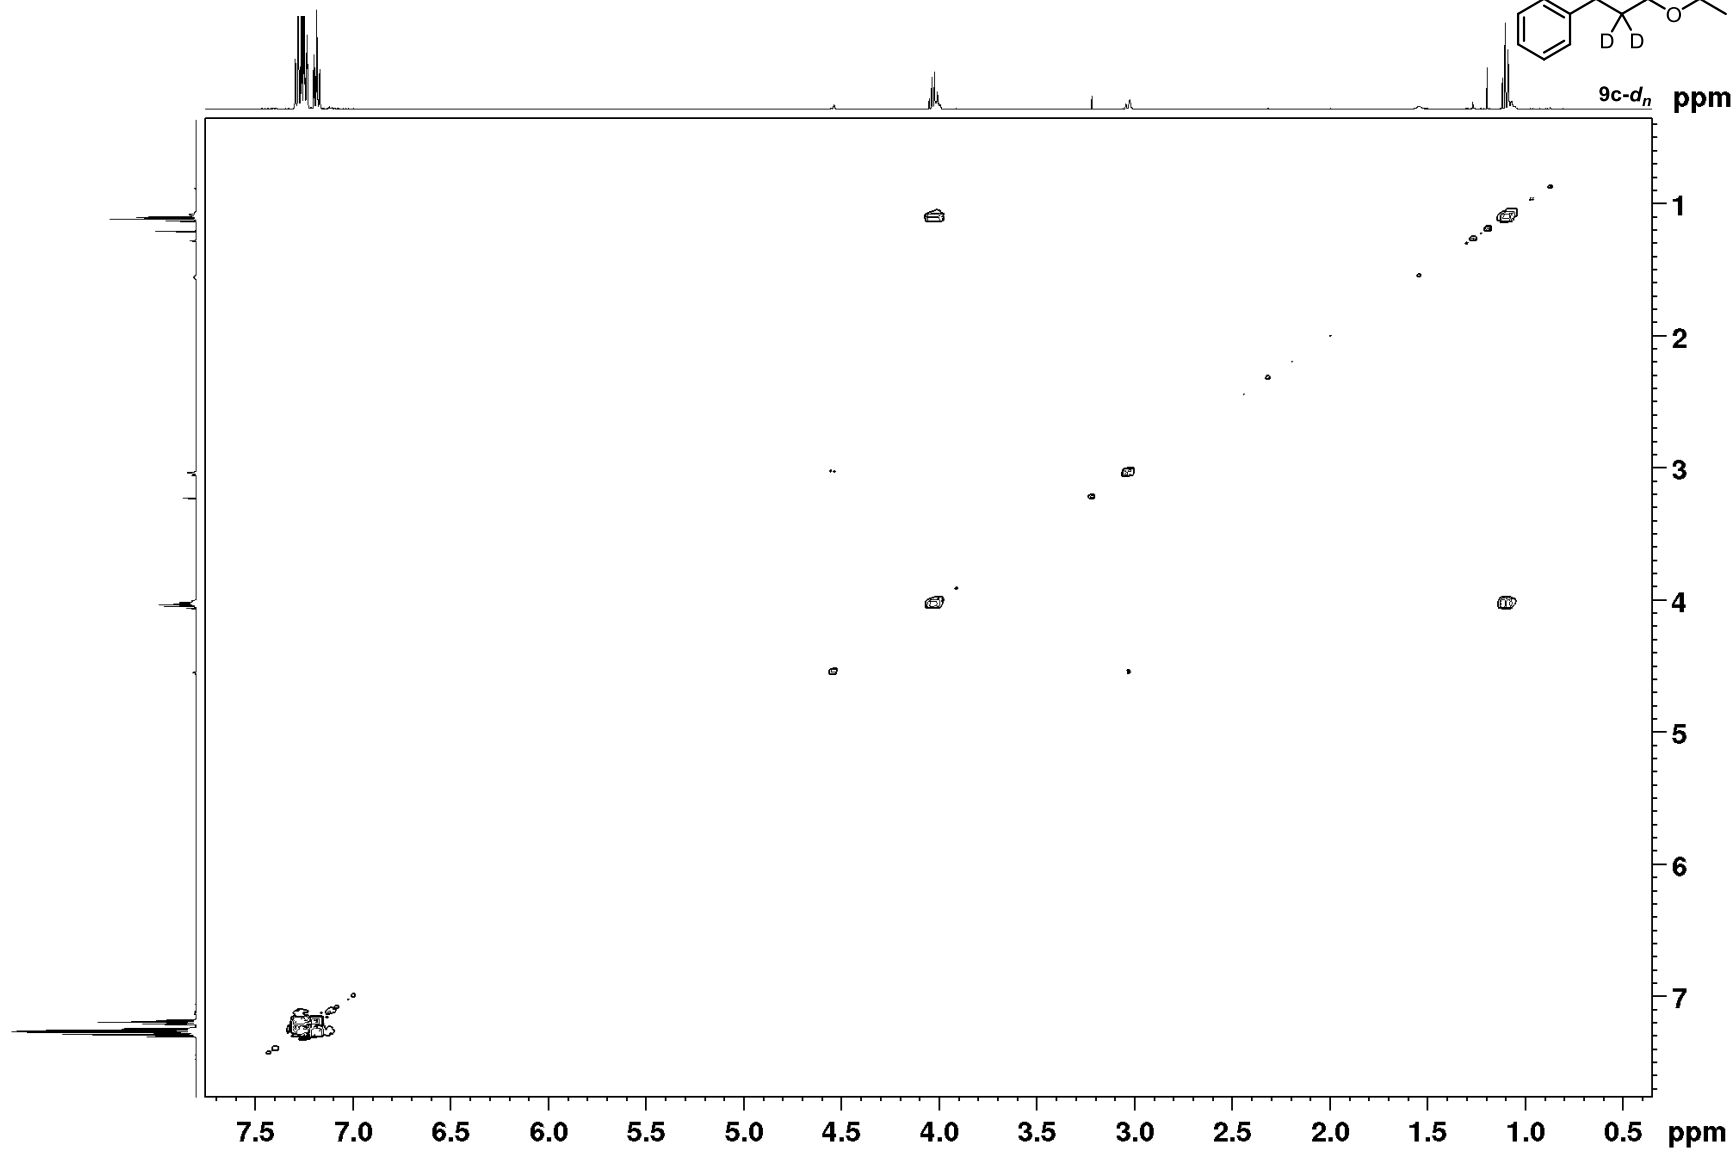

$^1\text{H}$ - $^{13}\text{C}$  HMQC

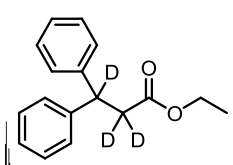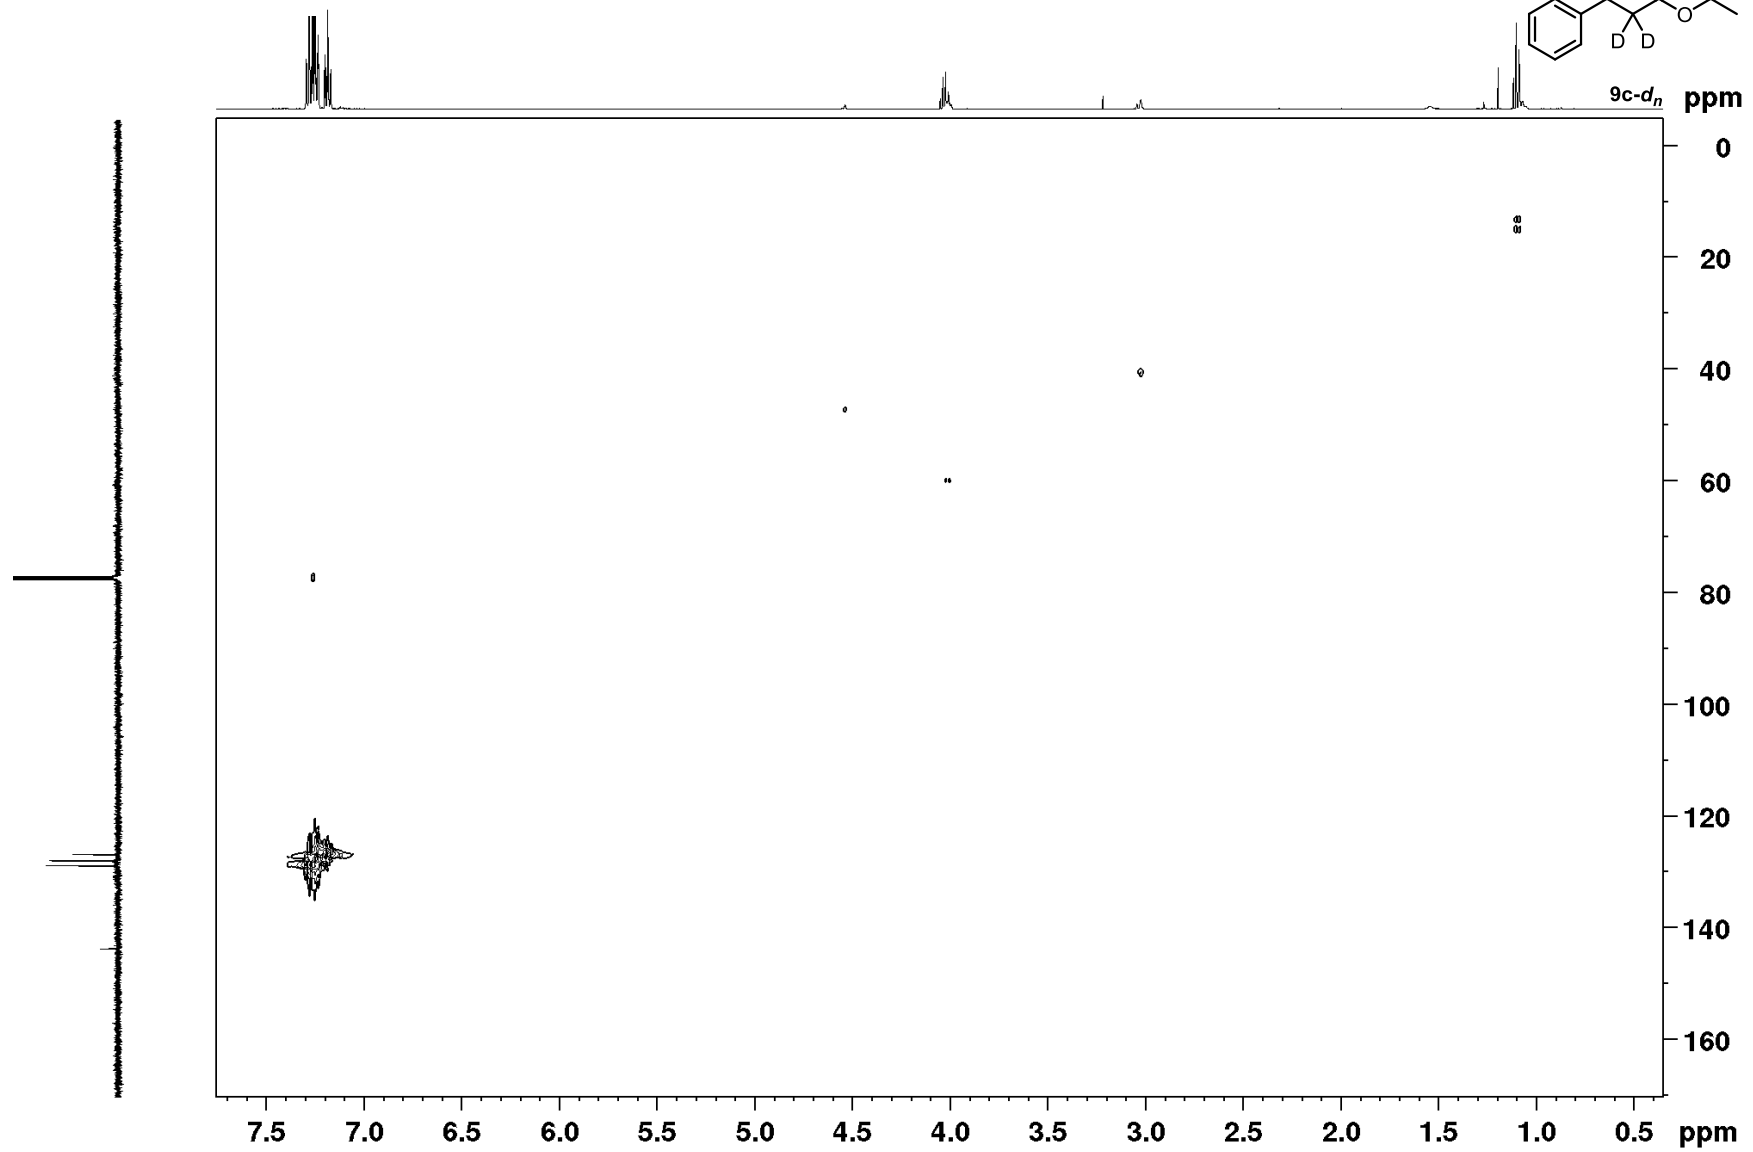

$^1\text{H}$ - $^{13}\text{C}$  HMBC

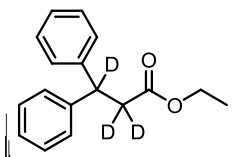

$^{13}\text{C}$  ppm

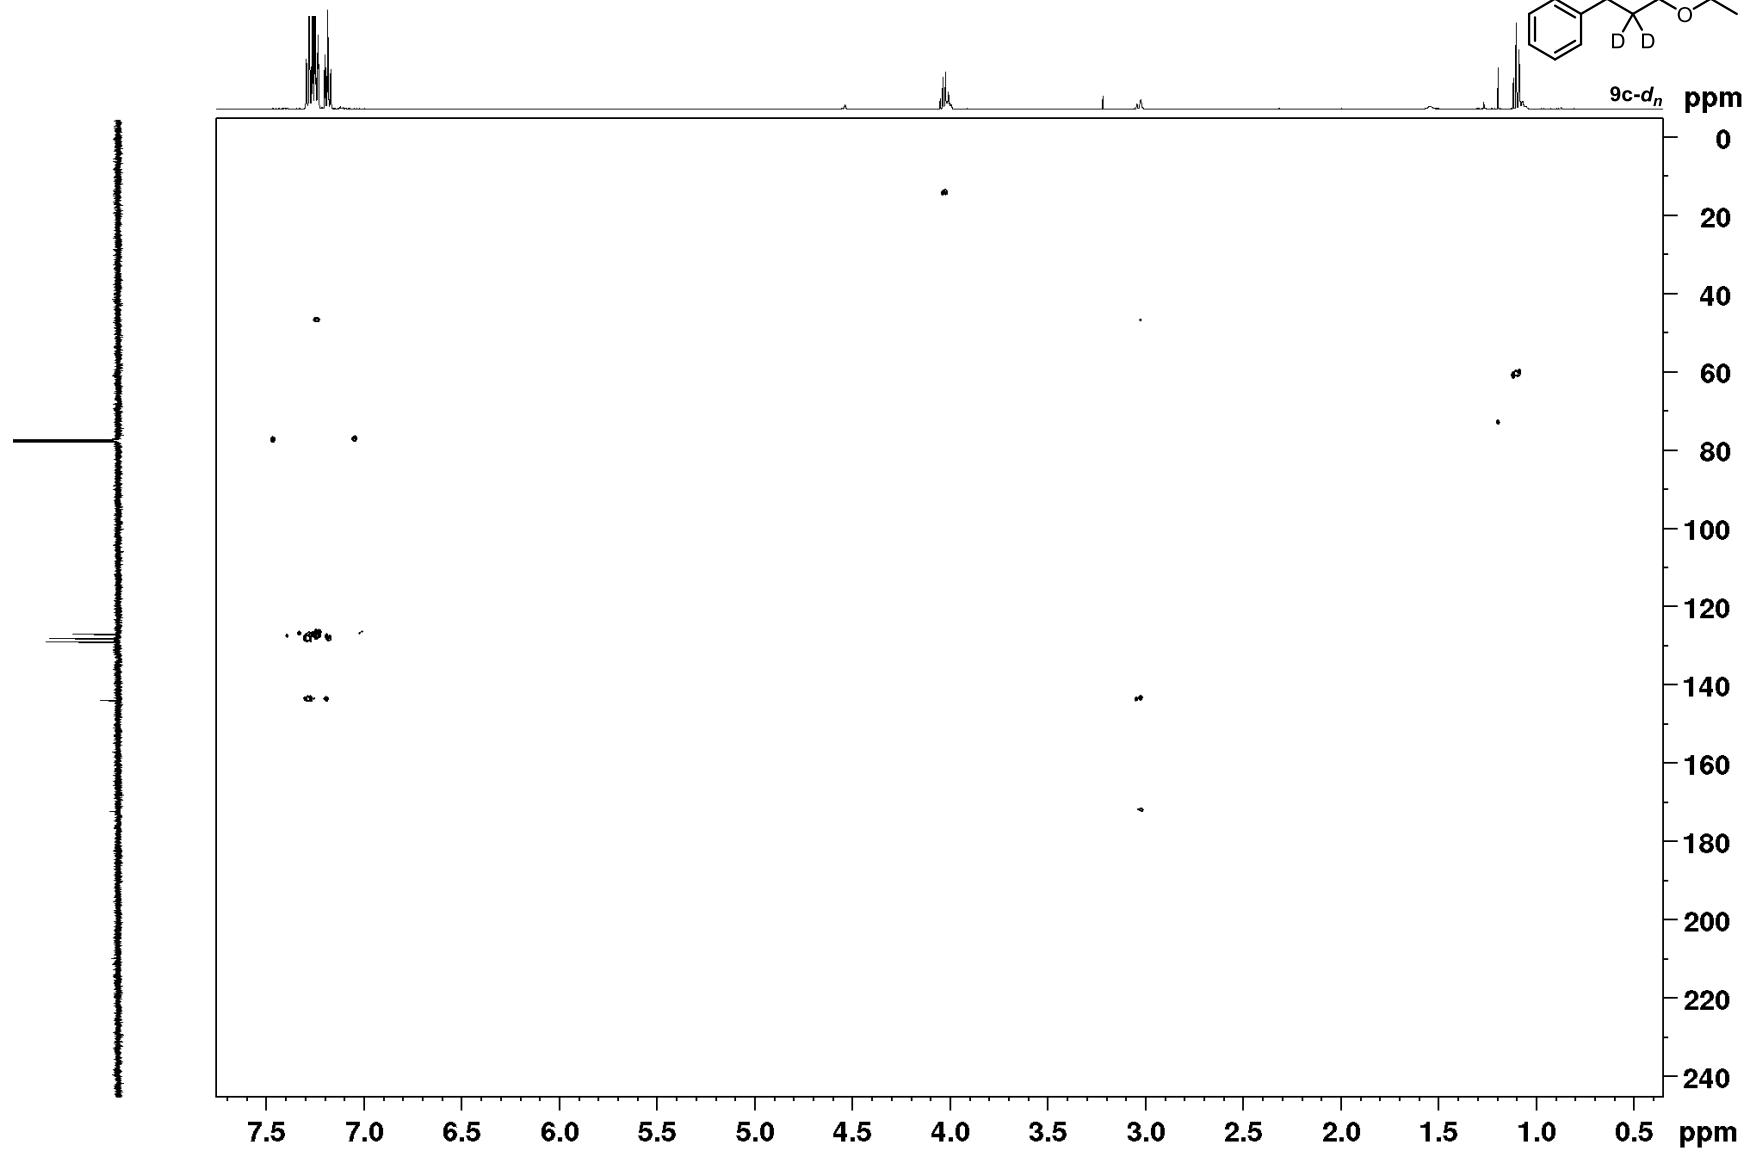

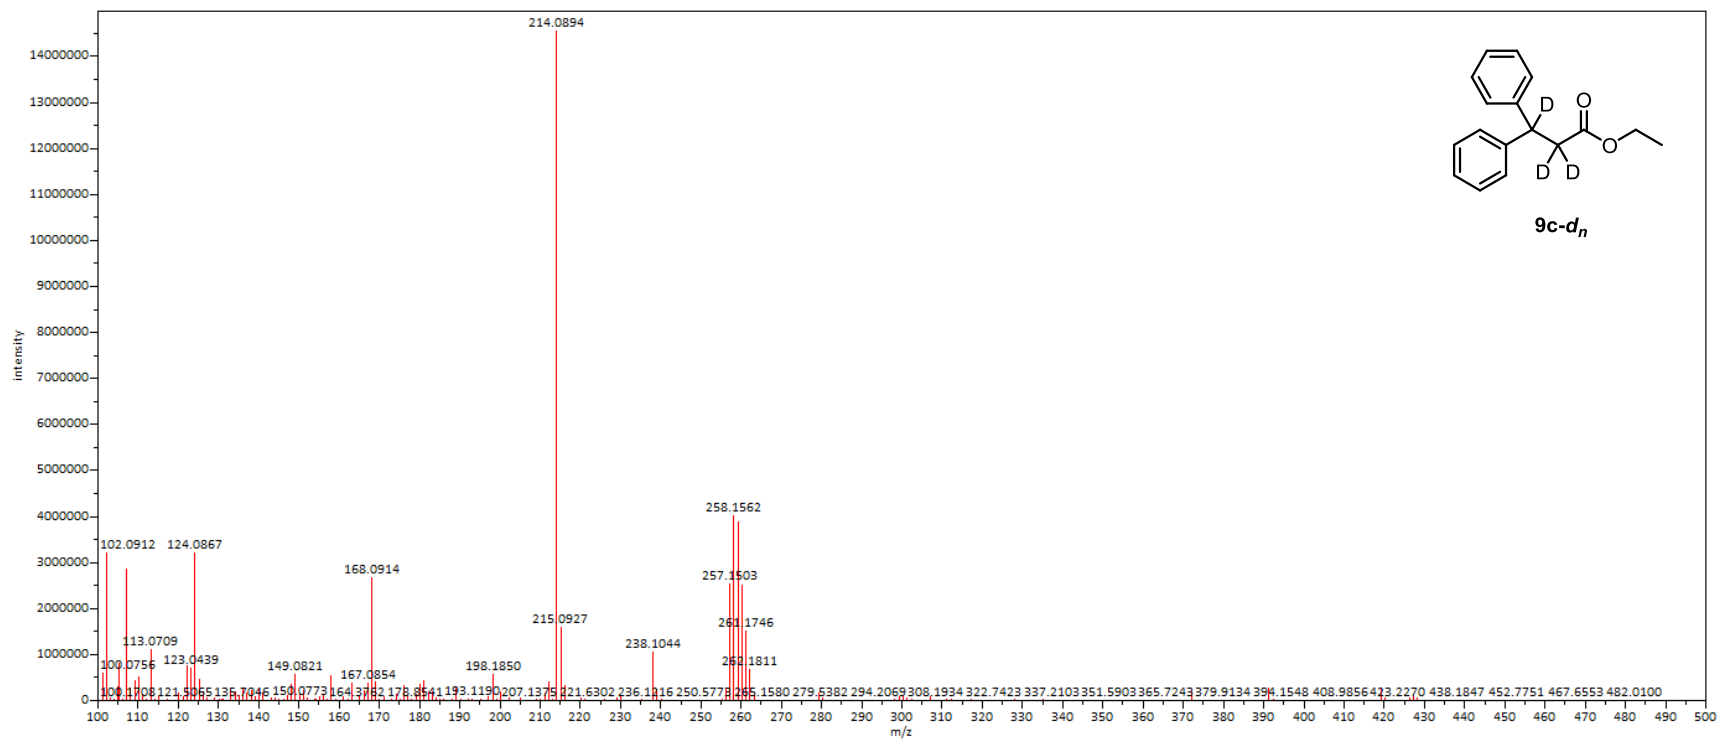

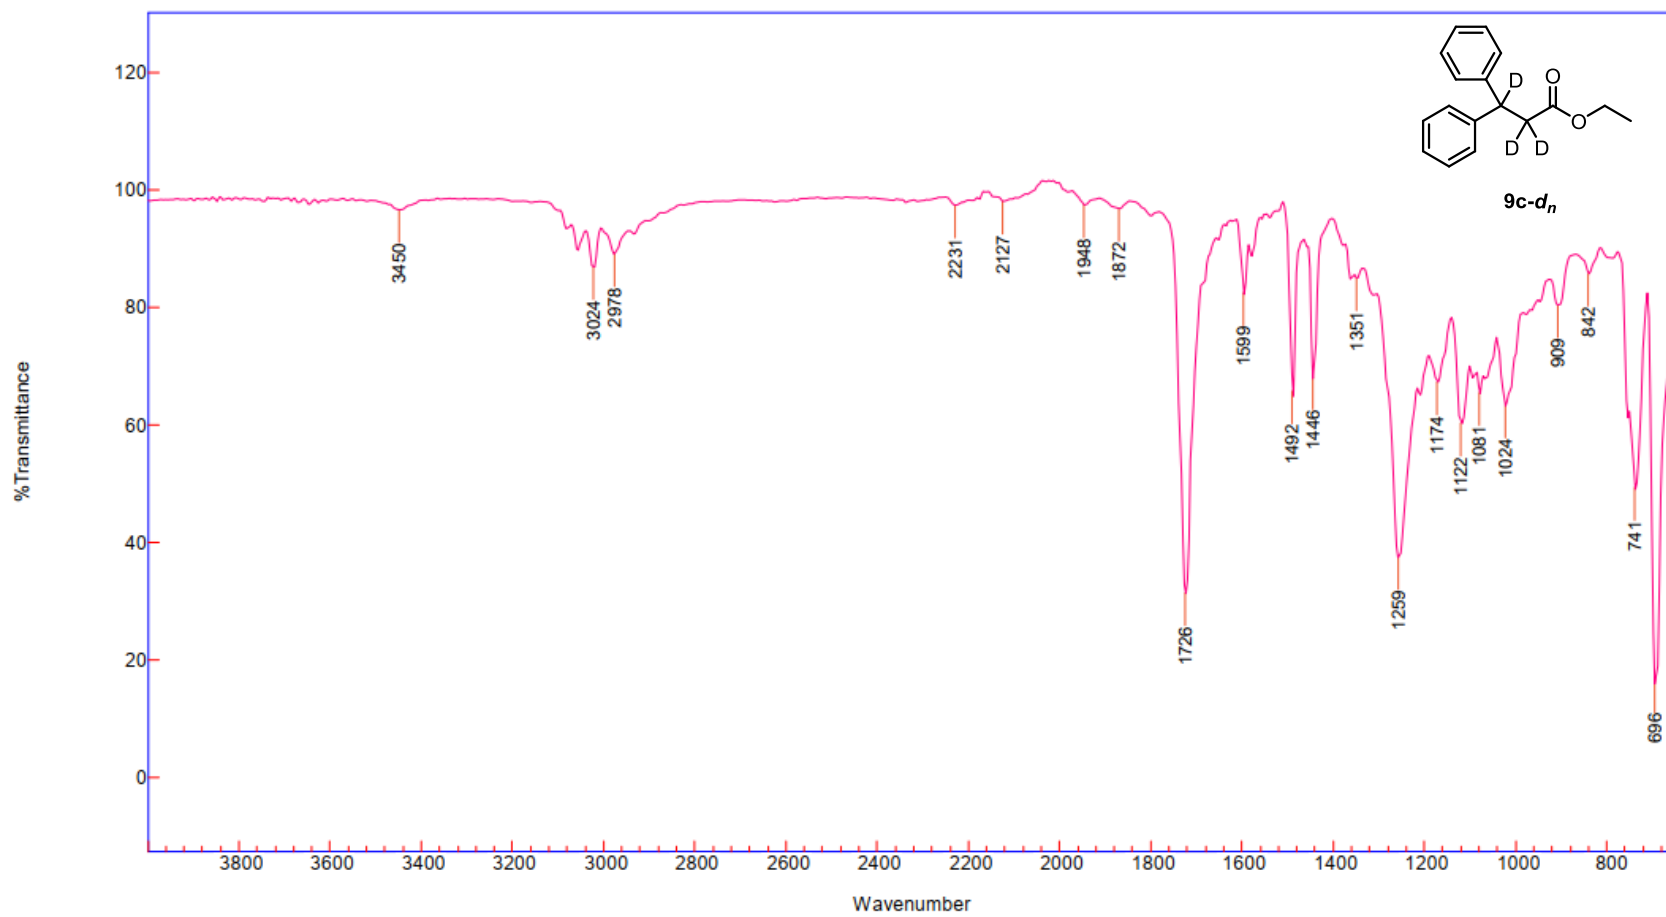

Ethyl 3-(4-methoxyphenyl)butanoate-2,2,3- $d_n$  (9d- $d_n$ )

quant.  $^1\text{H}$  NMR

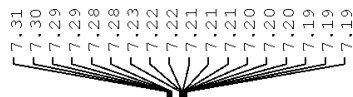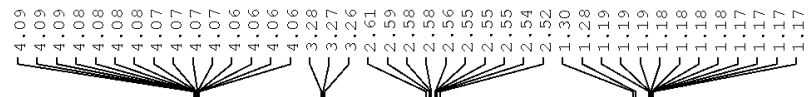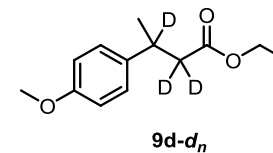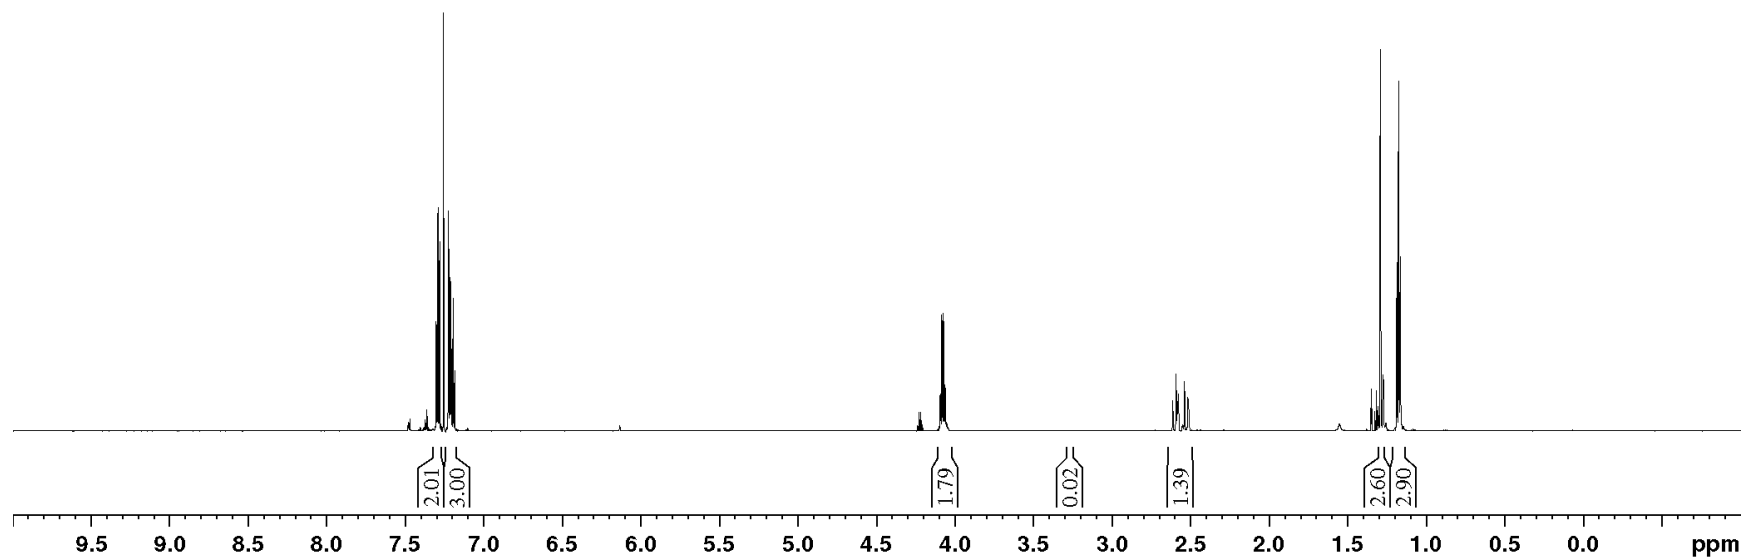

<sup>1</sup>H NMR

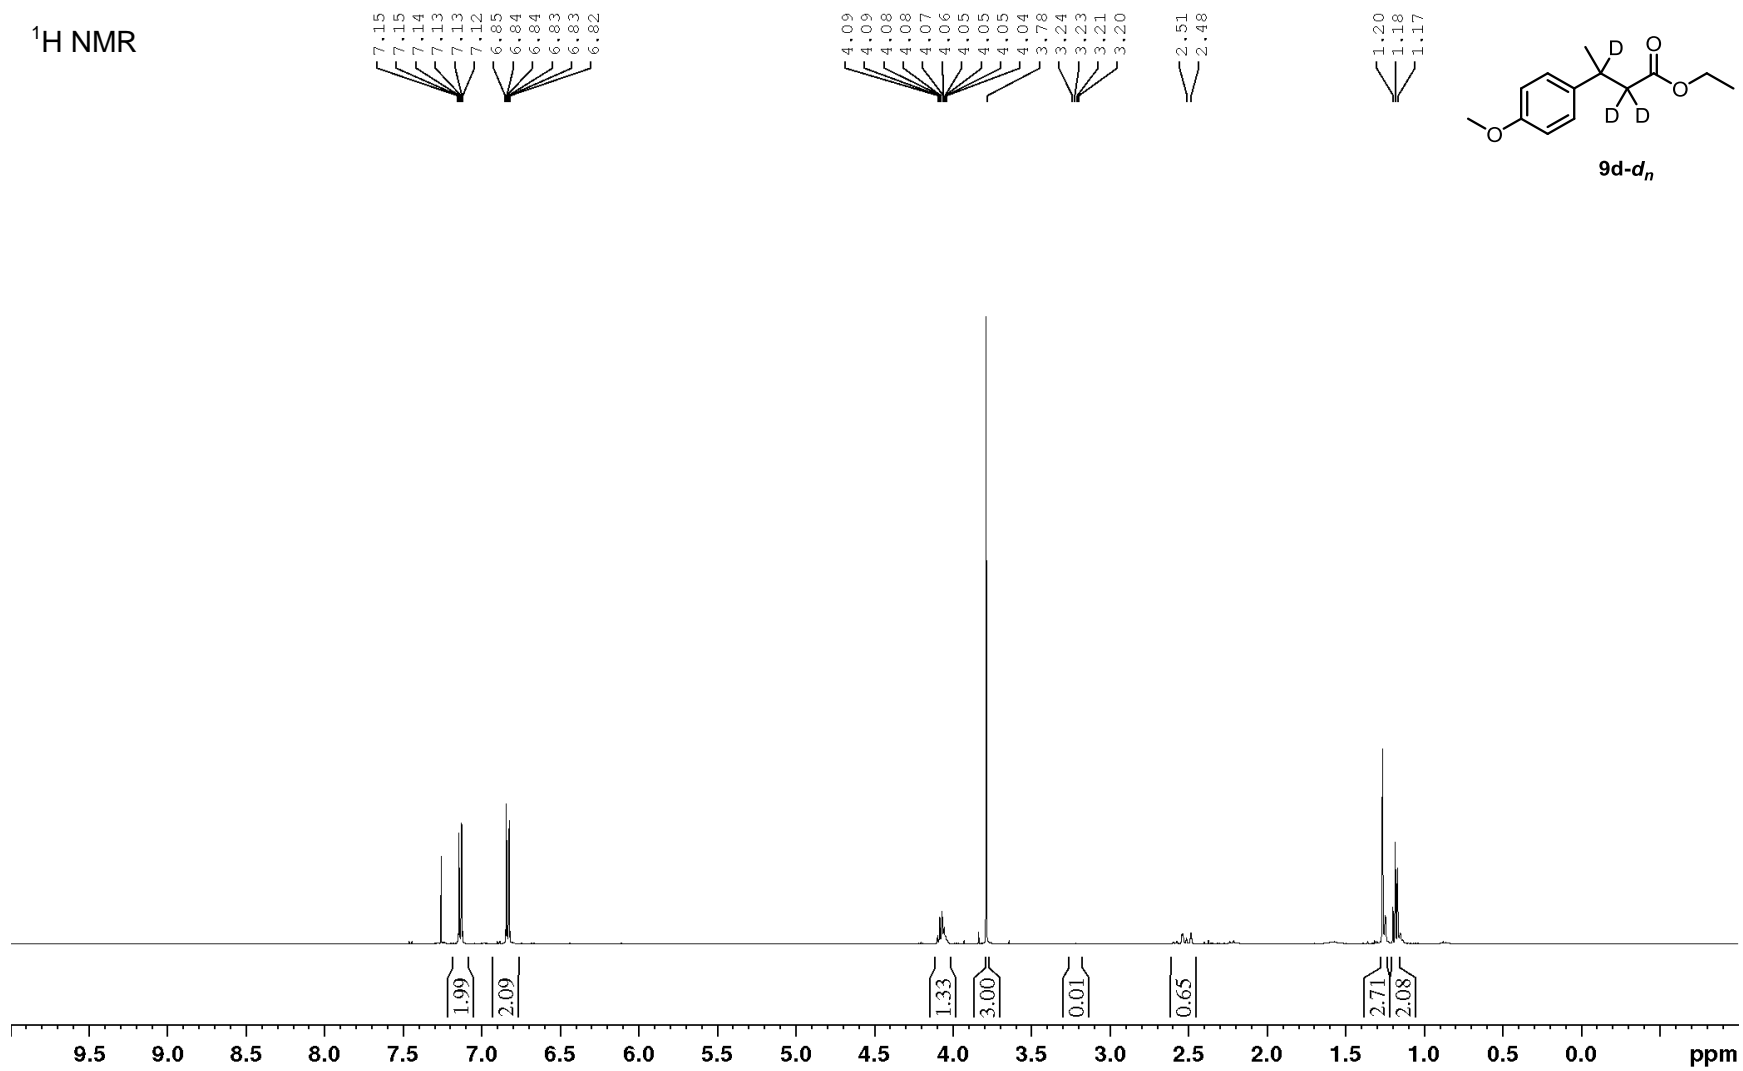

<sup>13</sup>C NMR

— 172.6  
— 156.6  
— 138.3  
— 128.0  
— 114.1

60.5  
60.4  
60.4  
60.3  
60.2  
60.1  
60.1  
60.0  
60.0  
59.9  
59.9  
55.6  
43.4  
43.2  
43.1  
42.9  
42.8  
42.6  
42.4  
35.8  
35.8  
35.7  
35.6  
35.5  
35.4  
35.4  
22.1  
22.1  
21.9  
21.8  
21.6  
14.4  
14.3  
14.2  
14.1  
14.1  
14.0  
13.9

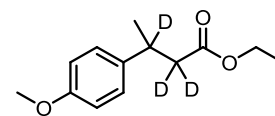

9d-d<sub>n</sub>

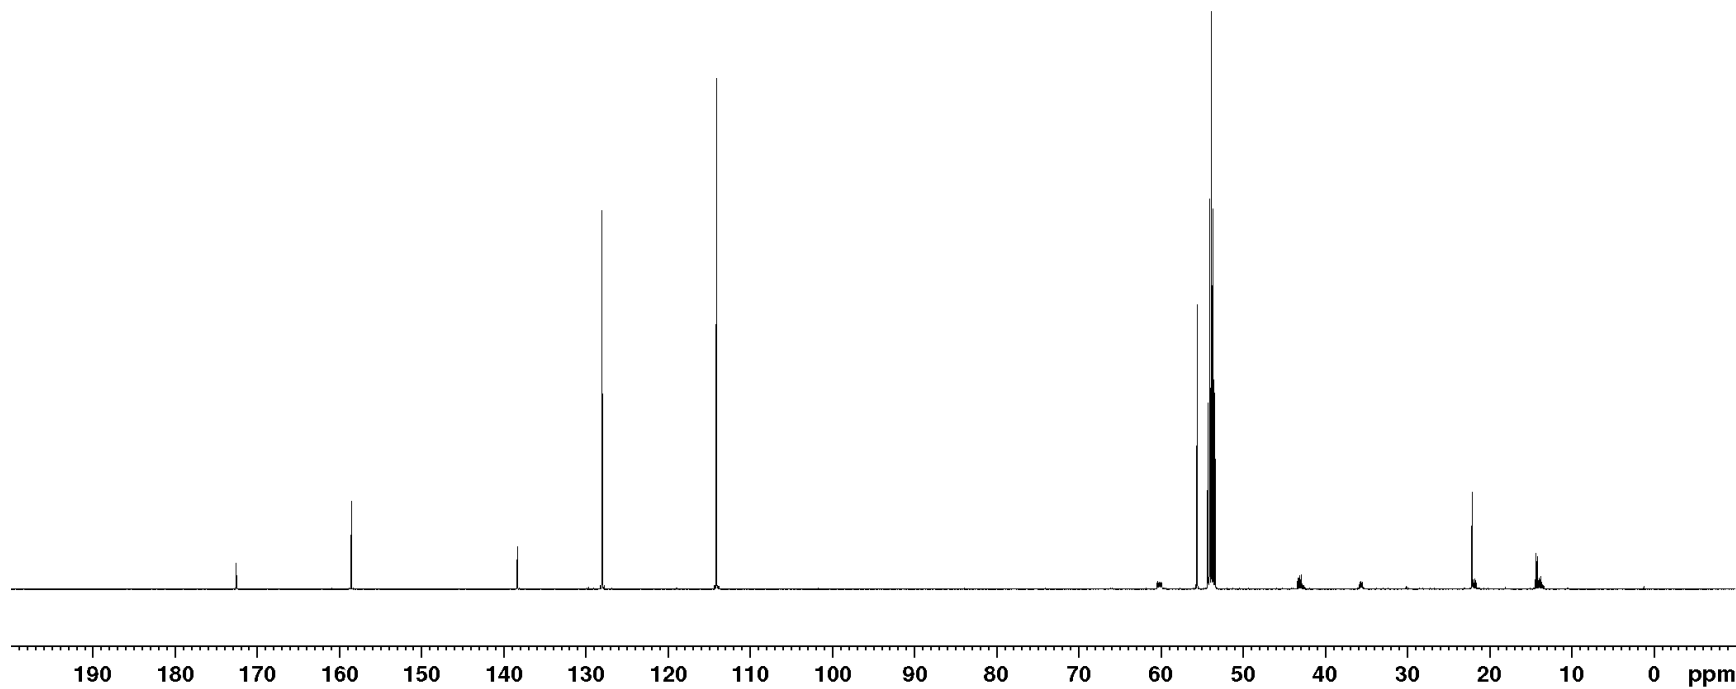



<sup>13</sup>C DEPT NMR

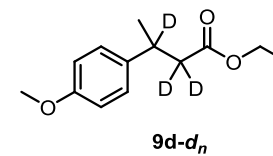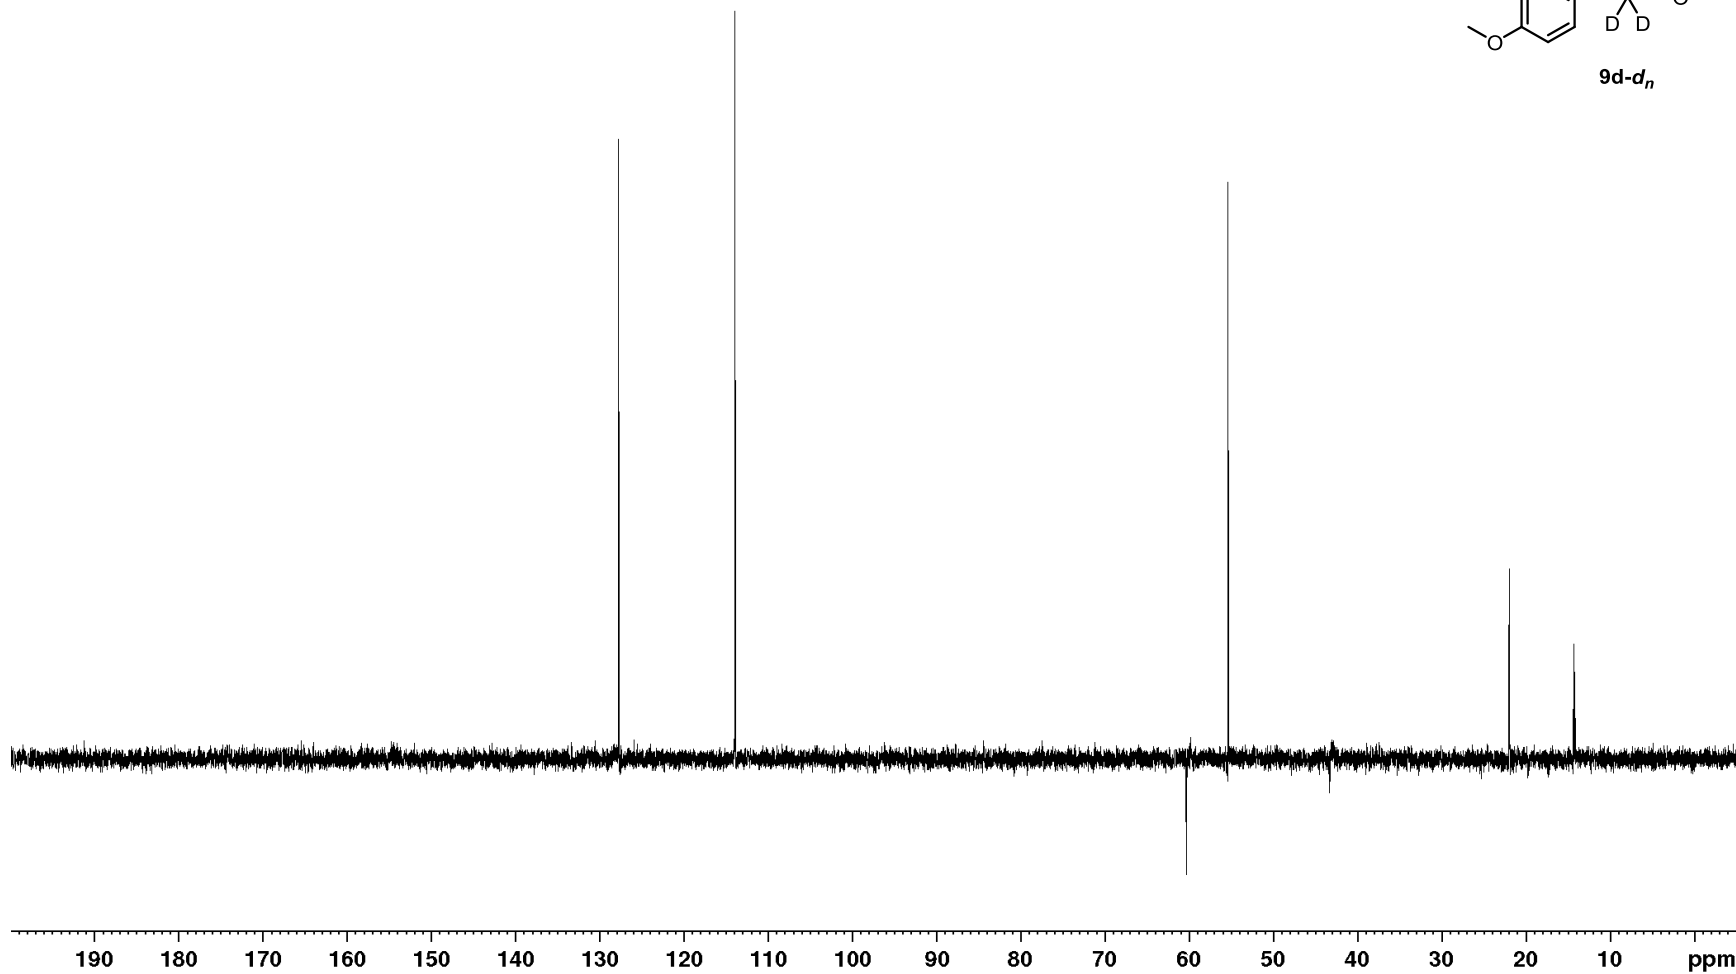

$^2\text{H}$  NMR

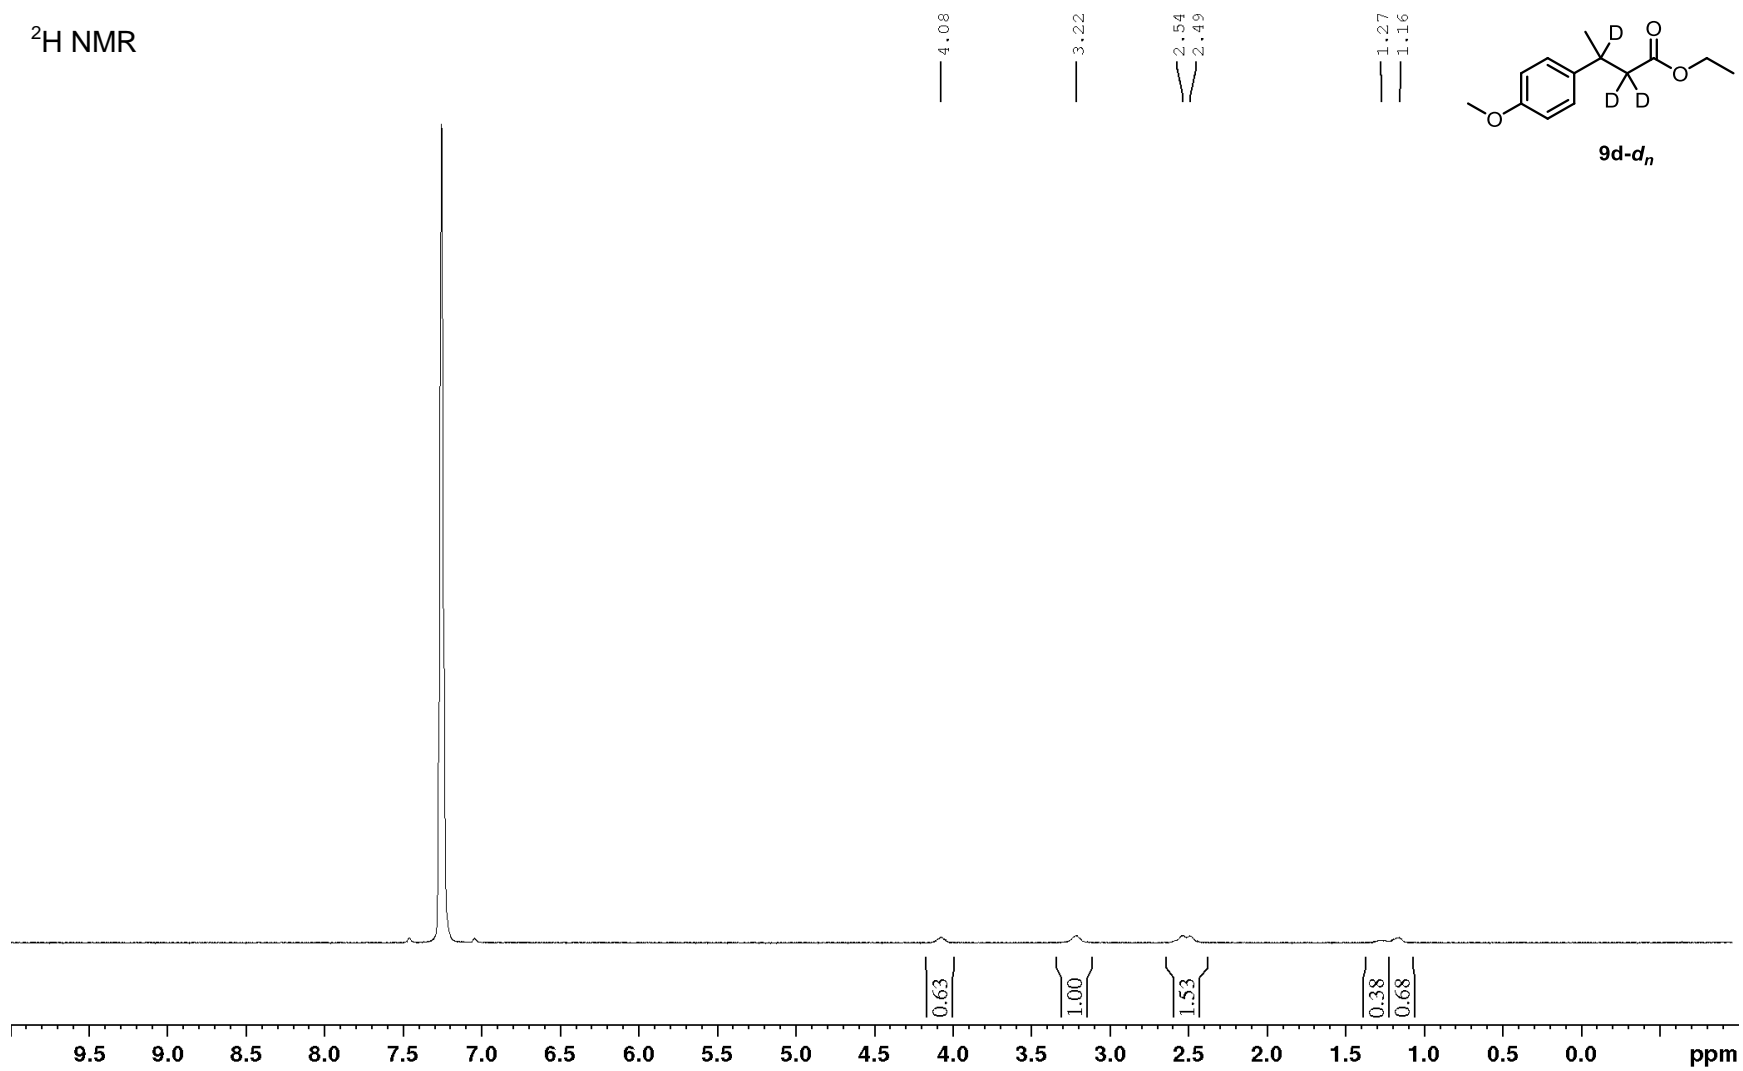

$^1\text{H}$ - $^1\text{H}$  COSY

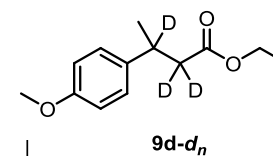

ppm

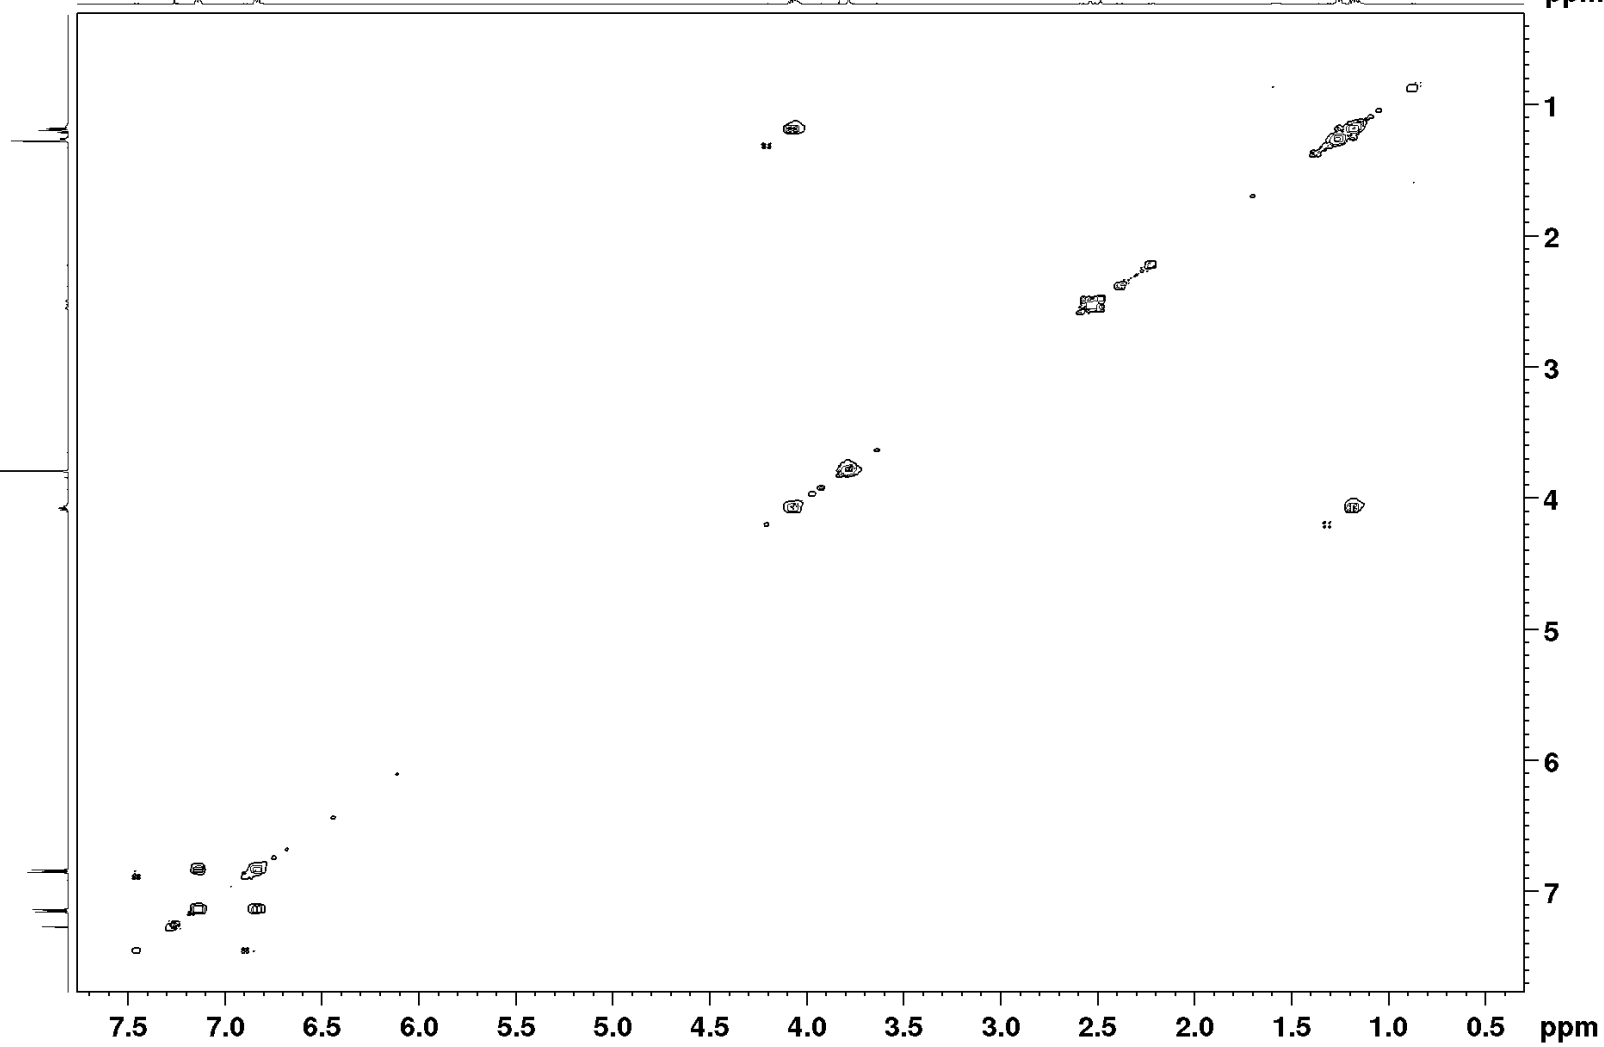

$^1\text{H}$ - $^{13}\text{C}$  HMQC

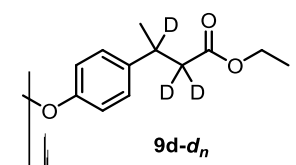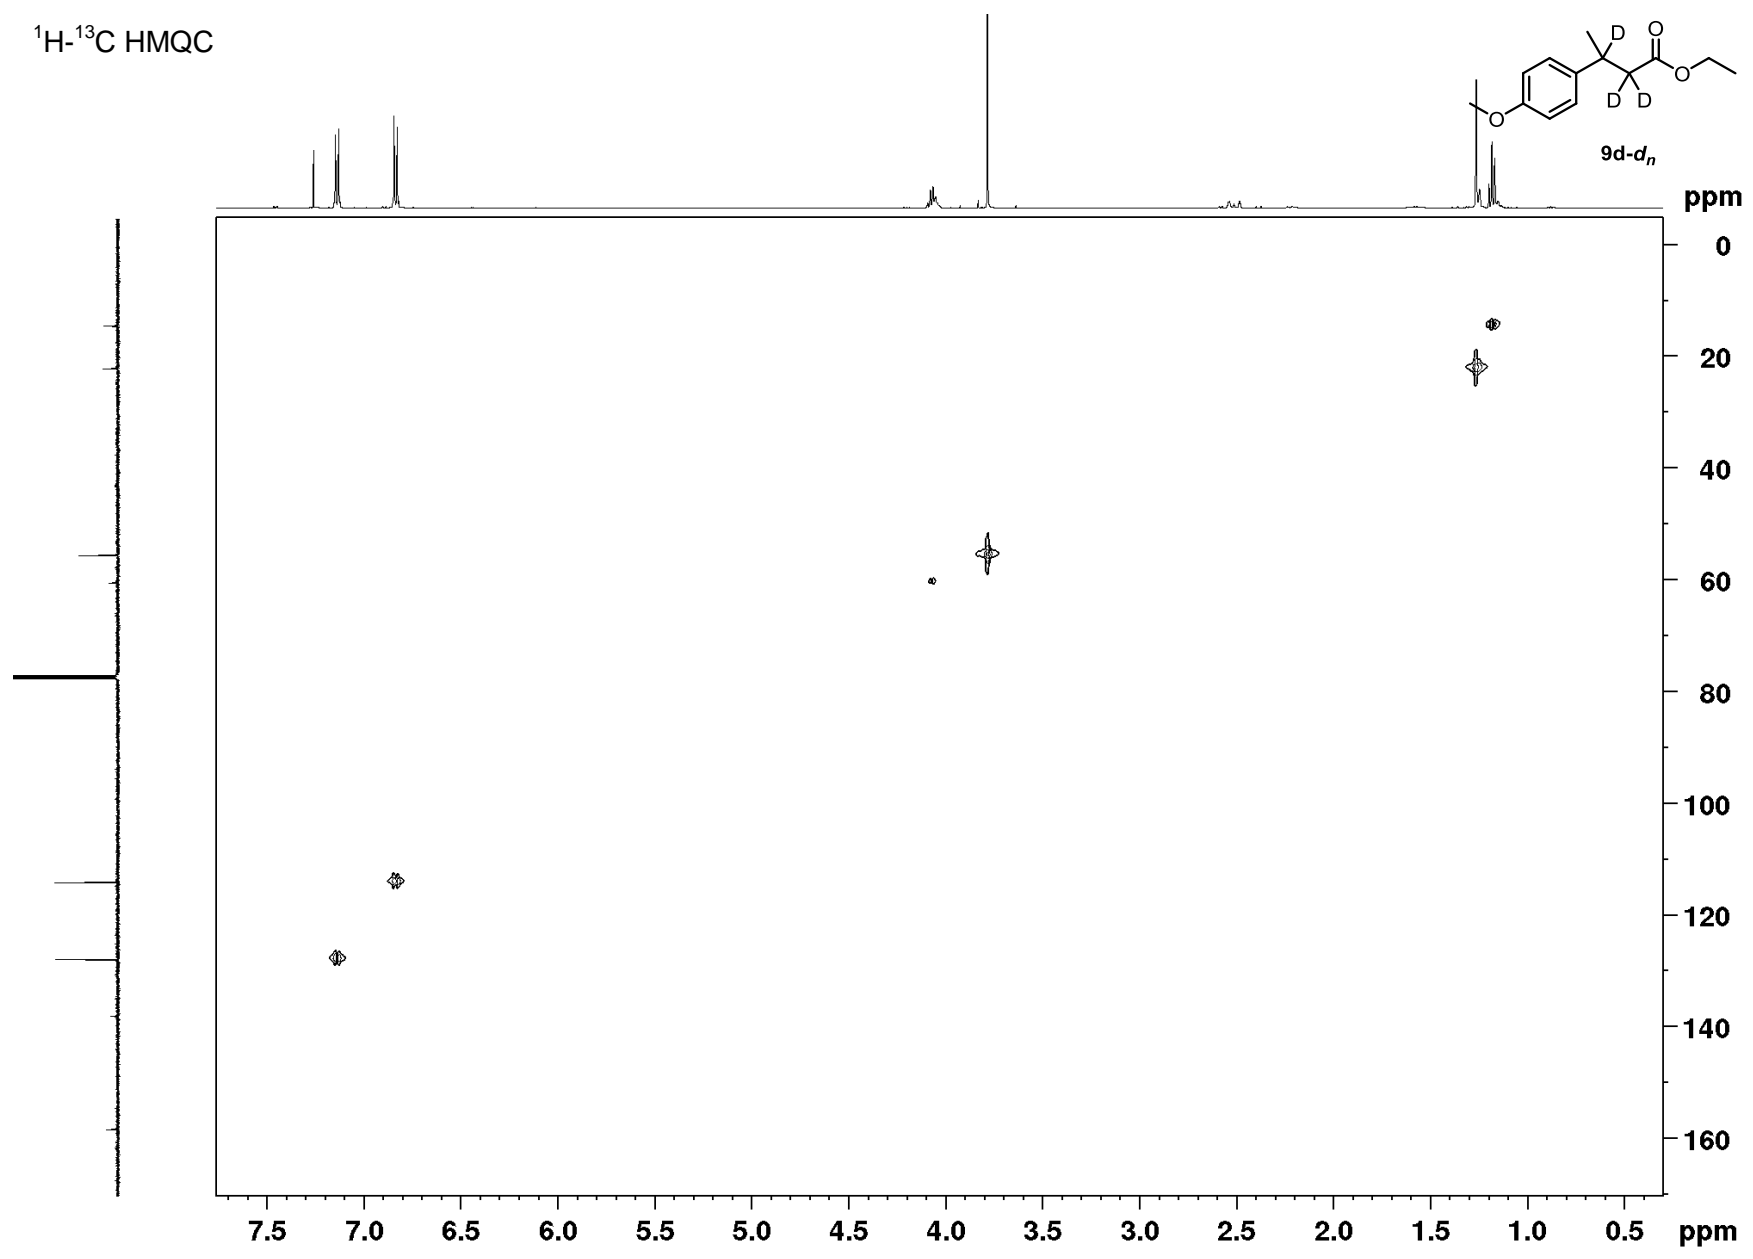

$^1\text{H}$ - $^{13}\text{C}$  HMBC

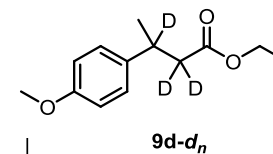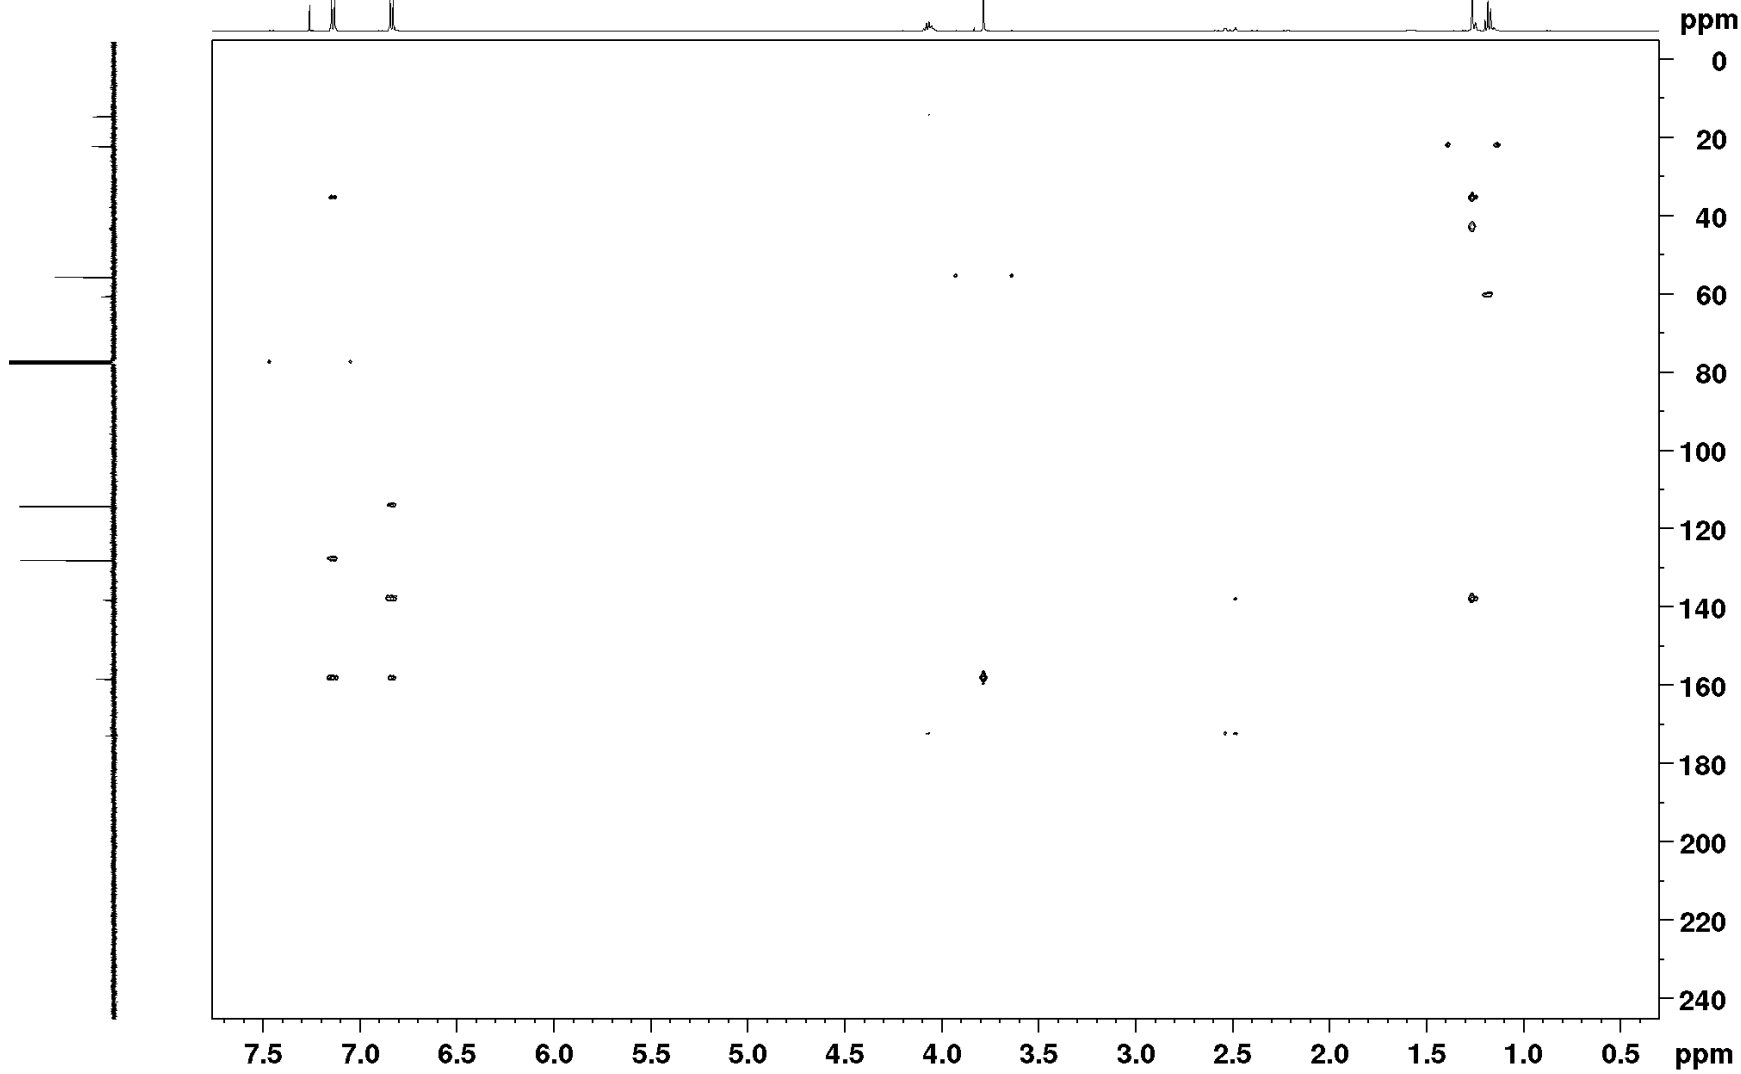

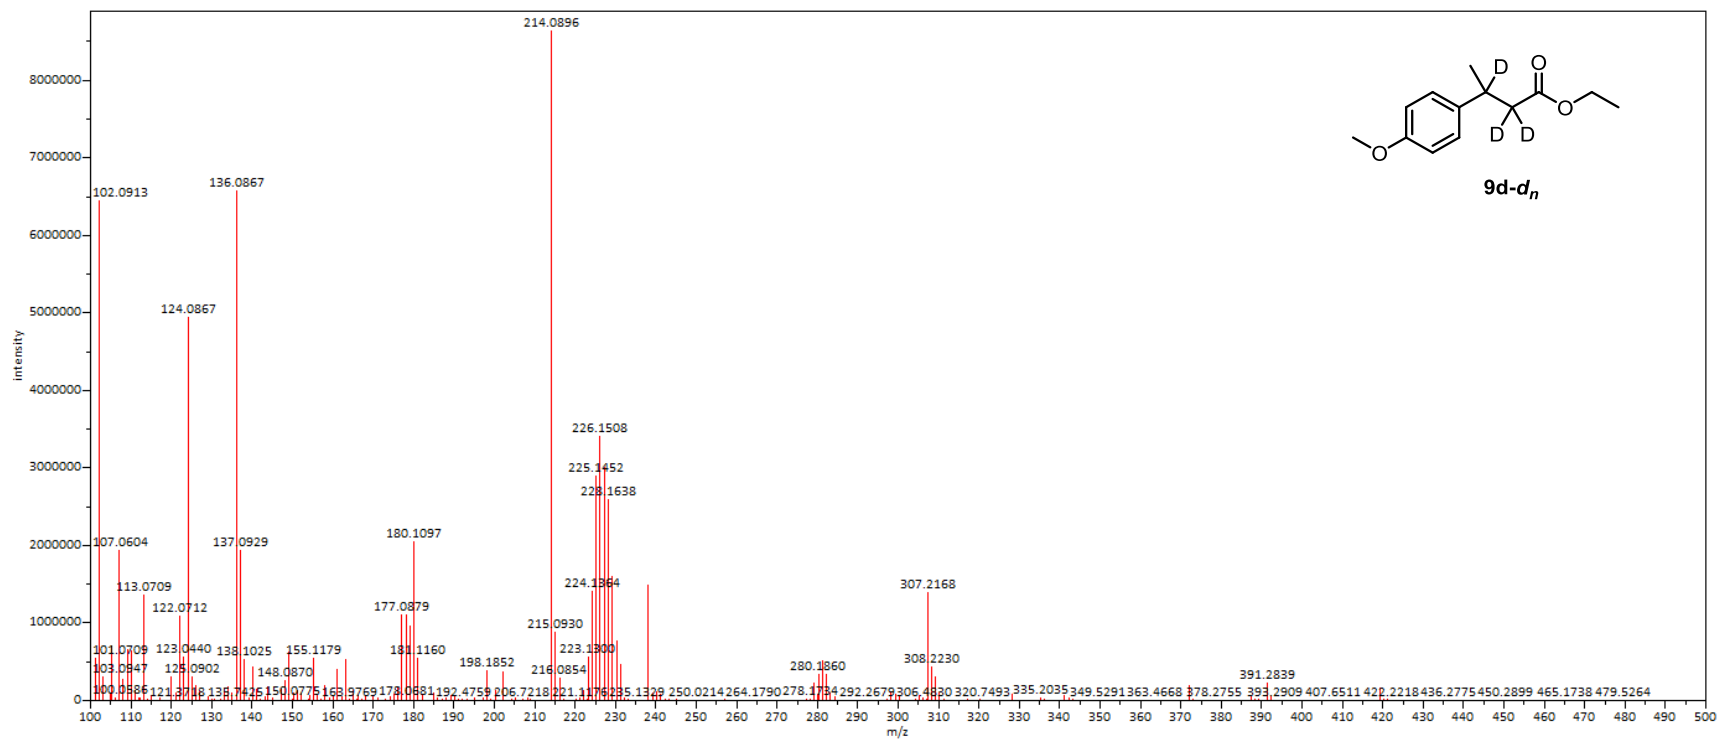

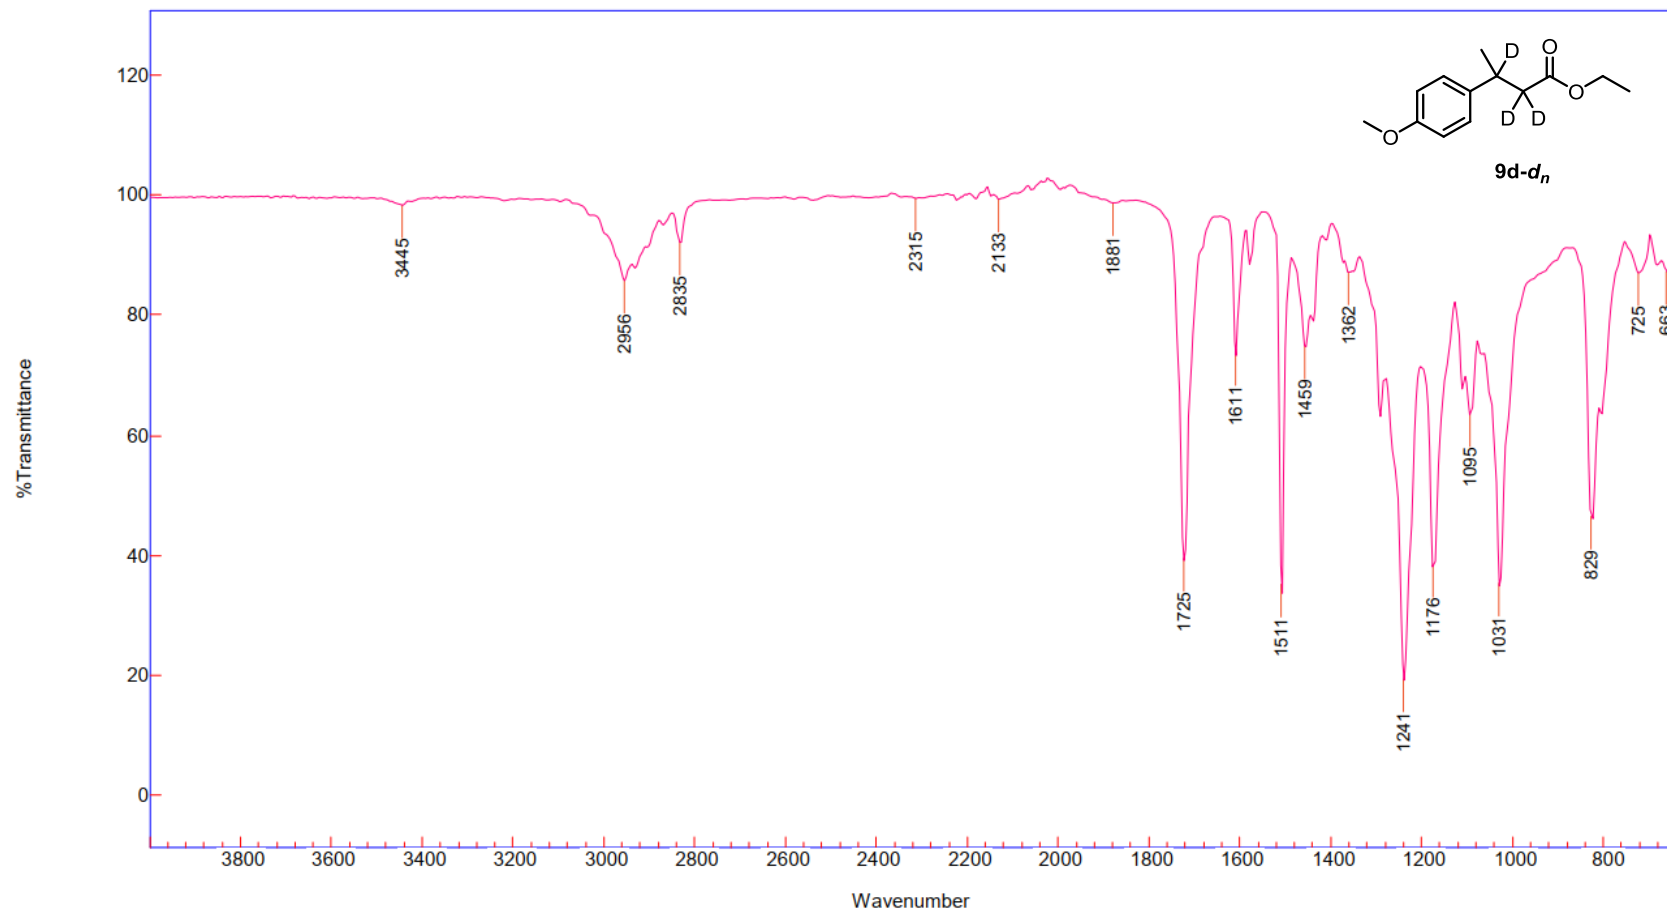

Ethyl 3-phenylbutanoate-2,2-d<sub>2</sub> (9d-d<sub>n</sub>)

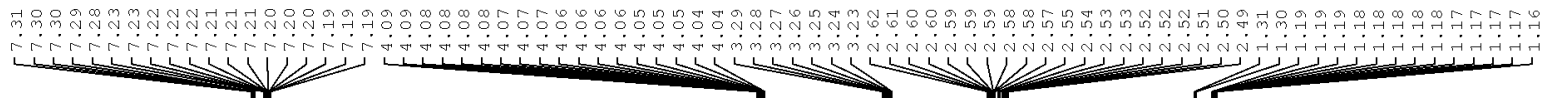

quant. <sup>1</sup>H NMR

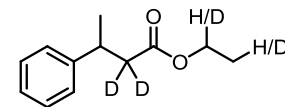

S14-d<sub>n</sub>

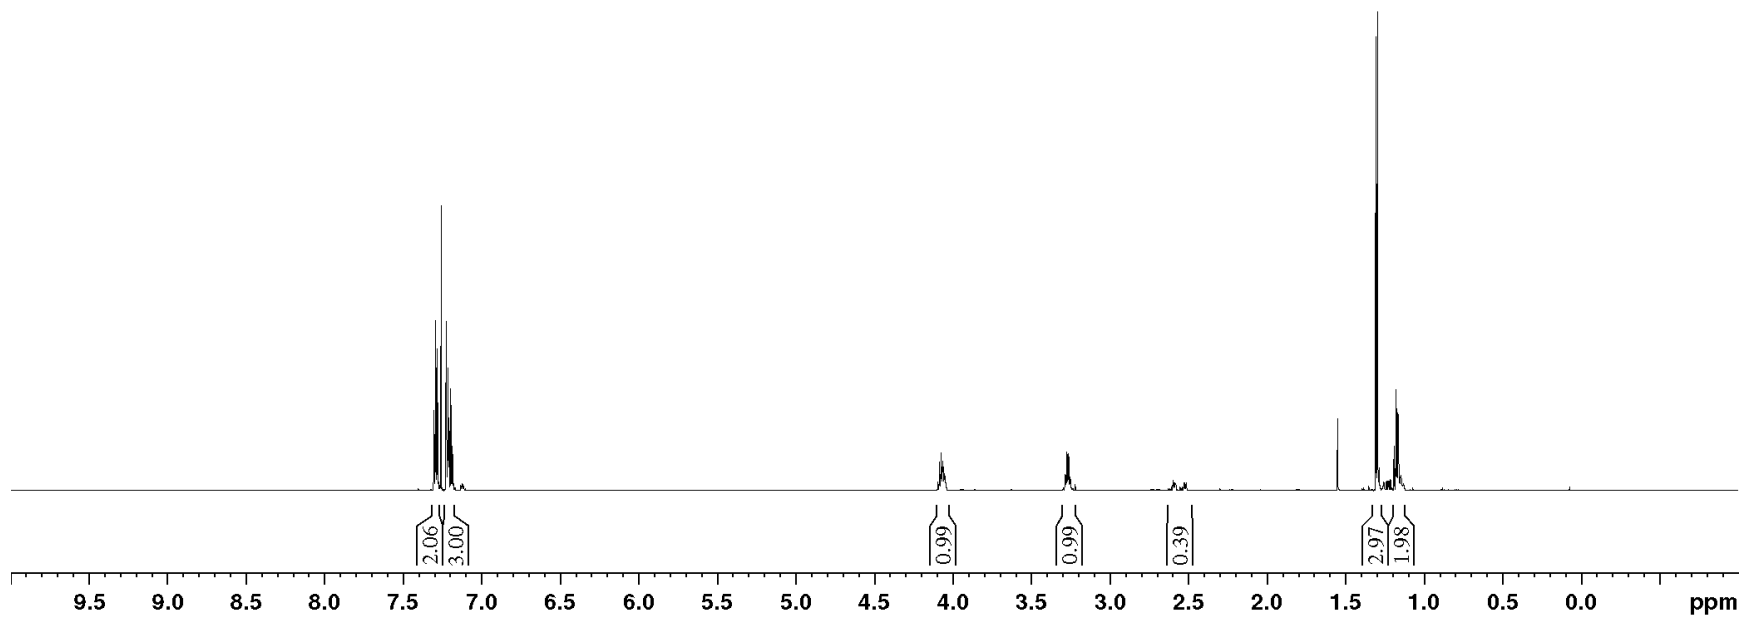



<sup>1</sup>H NMR

7.31  
7.31  
7.30  
7.29  
7.28  
7.28  
7.23  
7.23  
7.23  
7.22  
7.21  
7.21  
7.20  
7.20  
7.19  
7.19  
7.18  
7.18  
4.10  
4.10  
4.09  
4.08  
4.08  
4.07  
4.07  
4.07  
4.06  
4.06  
4.06  
4.05  
4.05  
4.04  
4.04  
4.04  
3.30  
3.29  
3.27  
3.26  
3.24  
3.23  
2.63  
2.62  
2.60  
2.60  
2.59  
2.59  
2.58  
2.58  
2.56  
2.56  
2.54  
2.53  
2.53  
2.52  
2.52  
2.51  
2.51  
1.31  
1.30  
1.20  
1.20  
1.19  
1.18  
1.17  
1.15  
1.15  
1.13

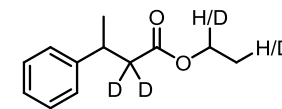

S14-d<sub>n</sub>

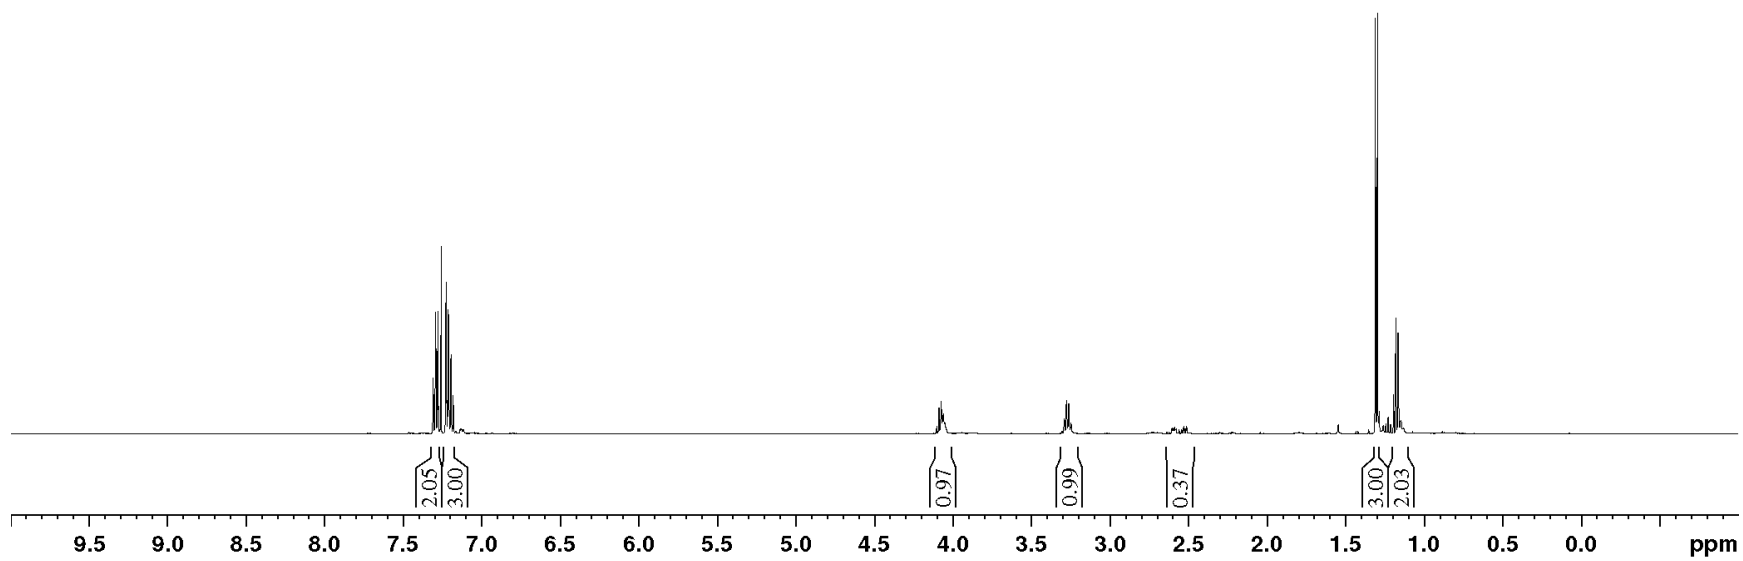

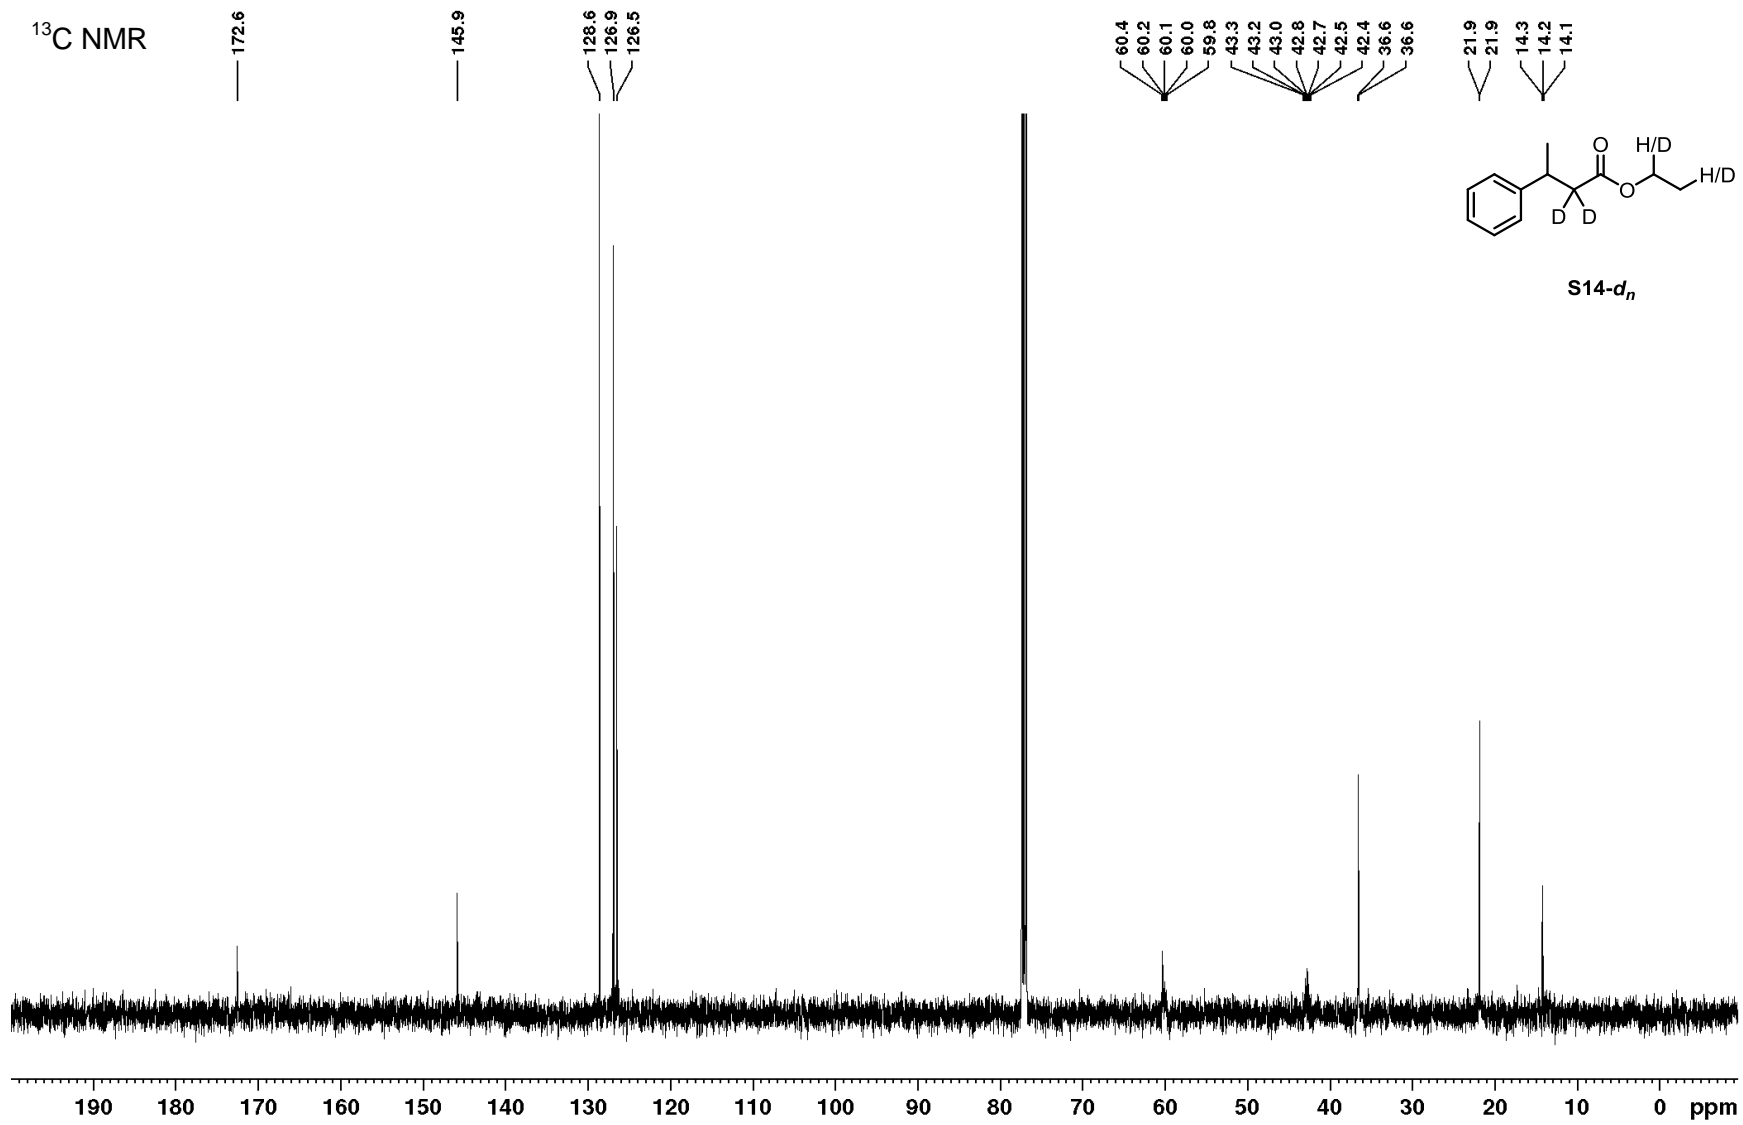

$^2\text{H}$  NMR

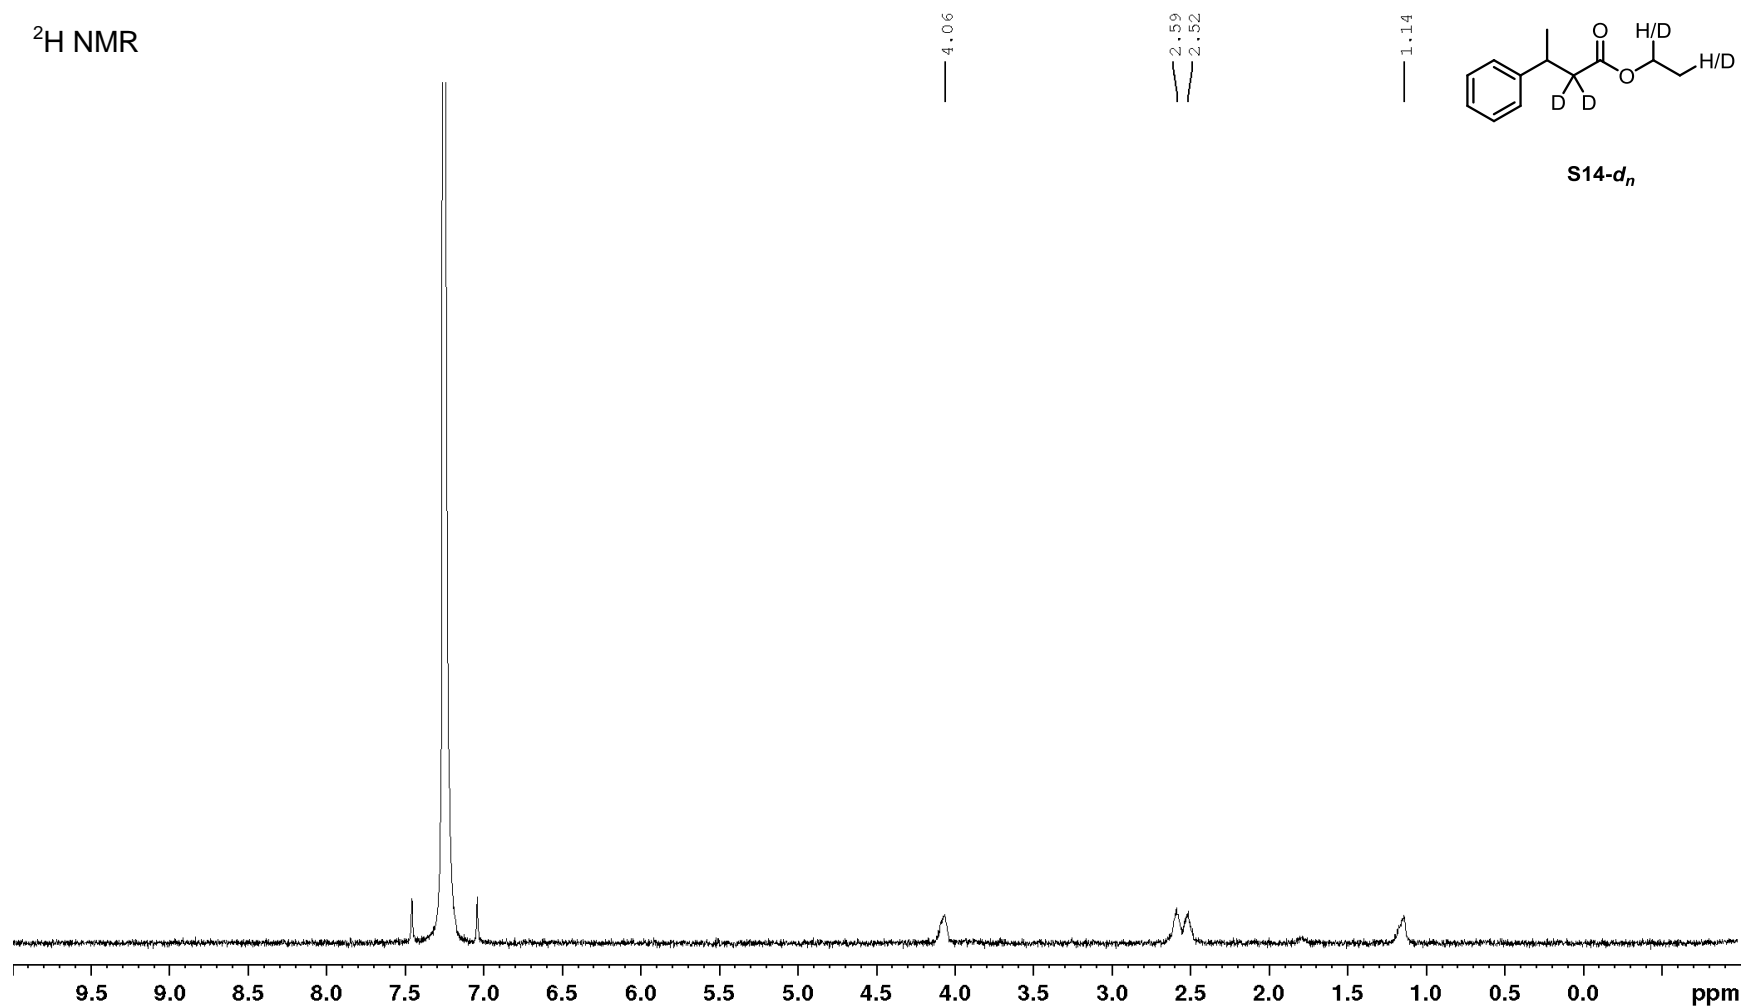

$^1\text{H}$ - $^1\text{H}$  COSY

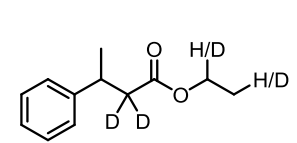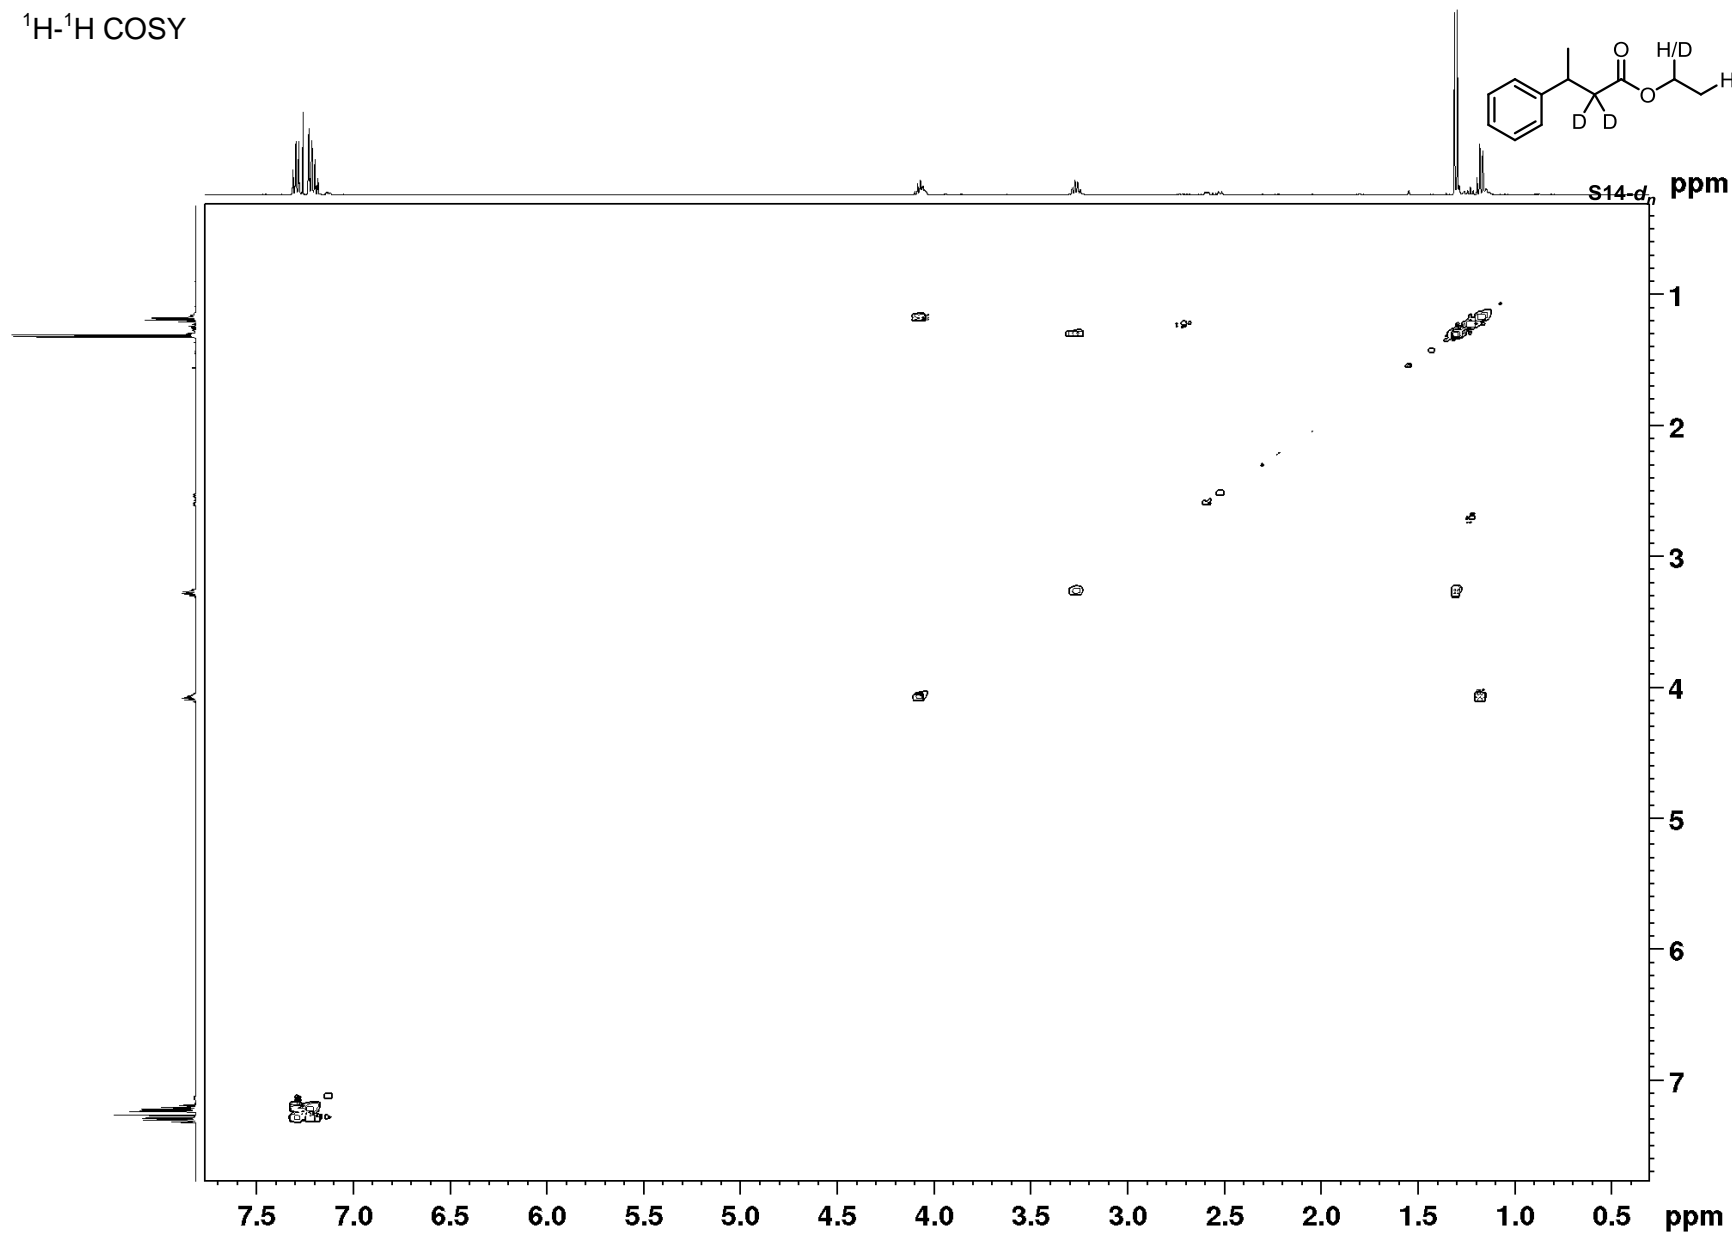

$^1\text{H}$ - $^{13}\text{C}$  HSQC

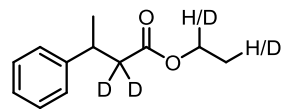

S14-d<sub>n</sub>

ppm

0

20

40

60

80

100

120

140

160

ppm

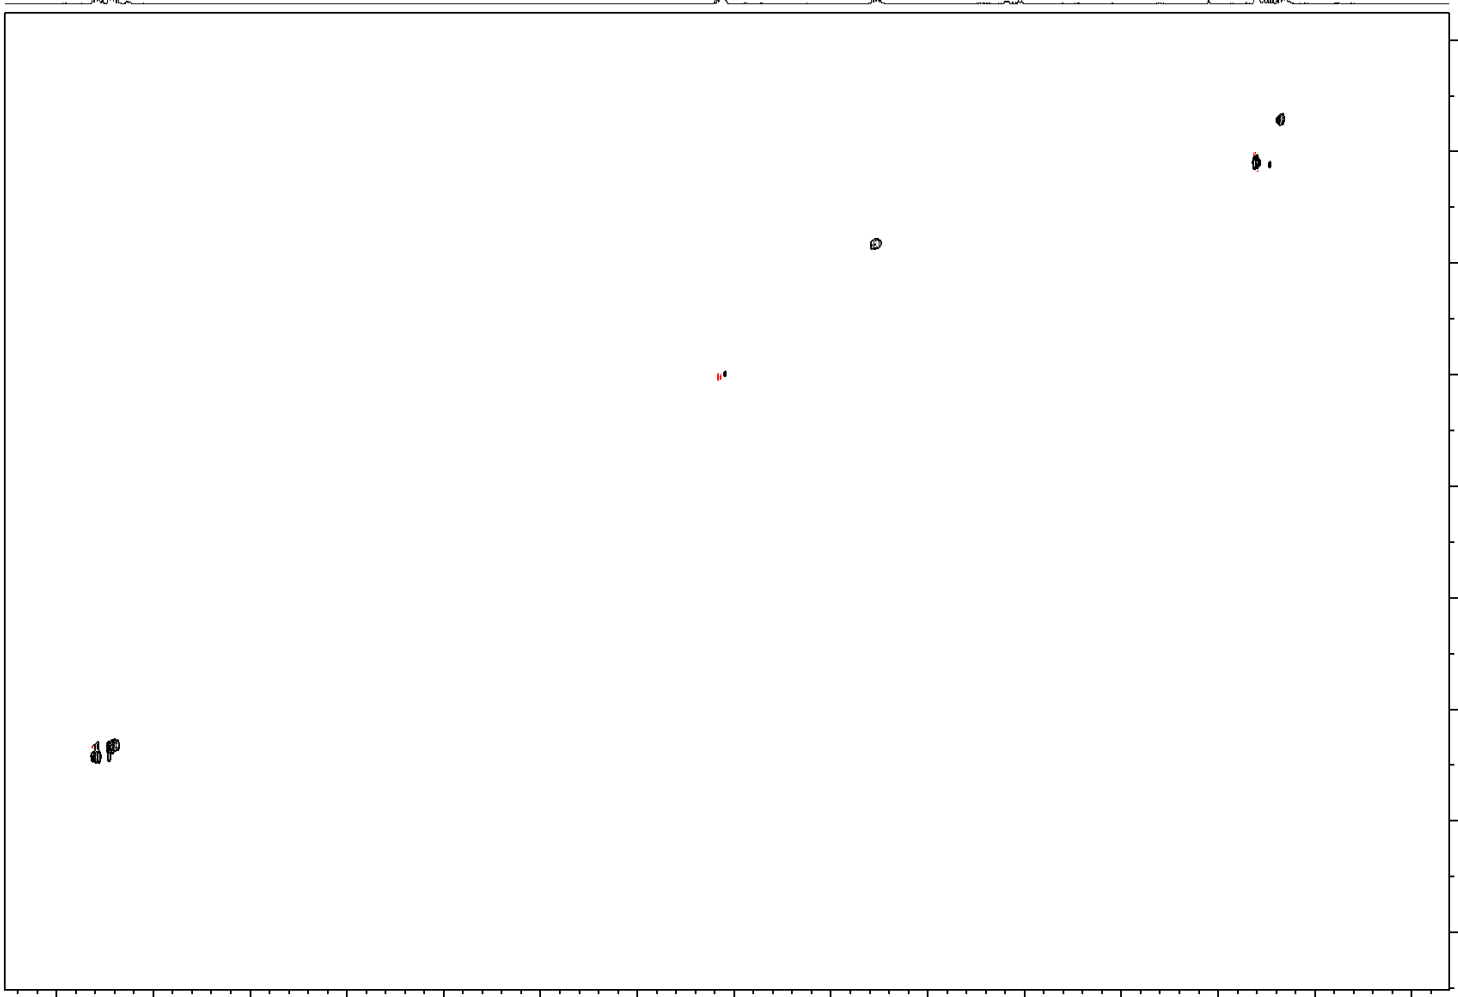

7.5 7.0 6.5 6.0 5.5 5.0 4.5 4.0 3.5 3.0 2.5 2.0 1.5 1.0 0.5 ppm

$^1\text{H}$ - $^{13}\text{C}$  HMBC

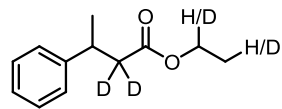

S14-d<sub>n</sub>

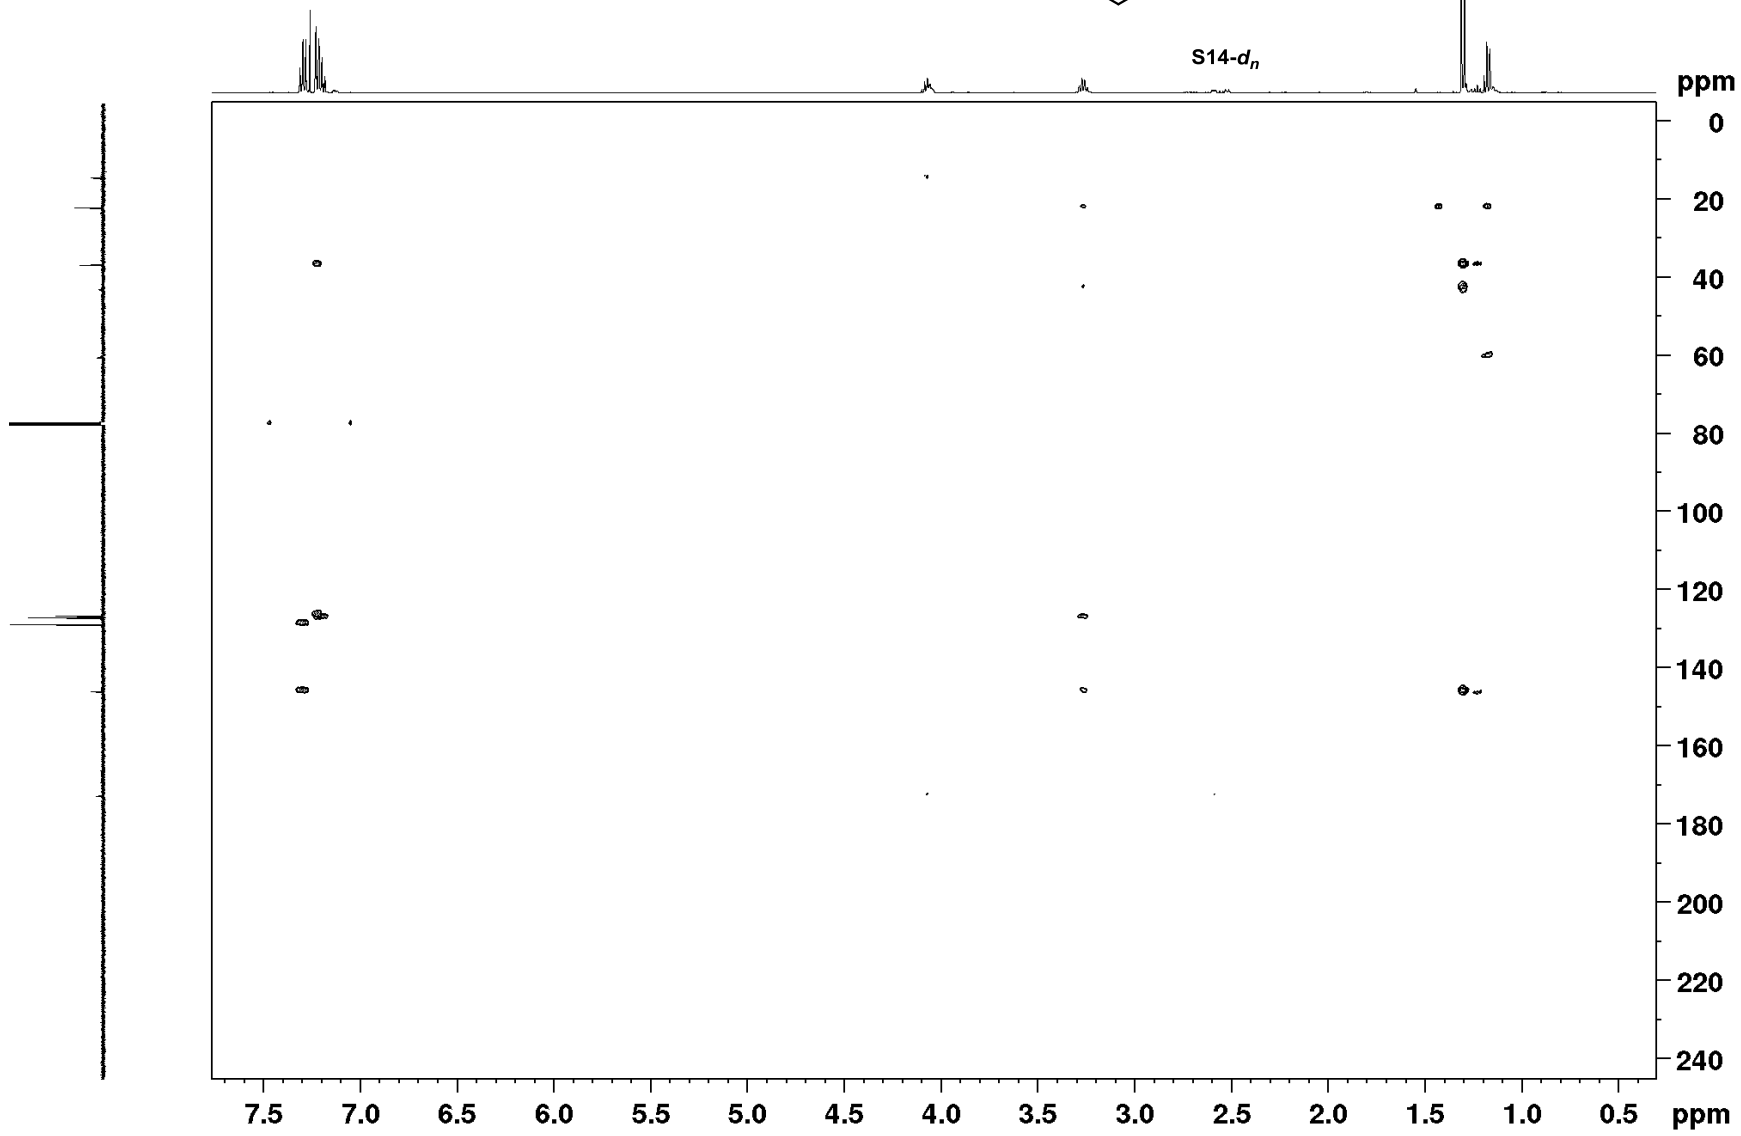

S330

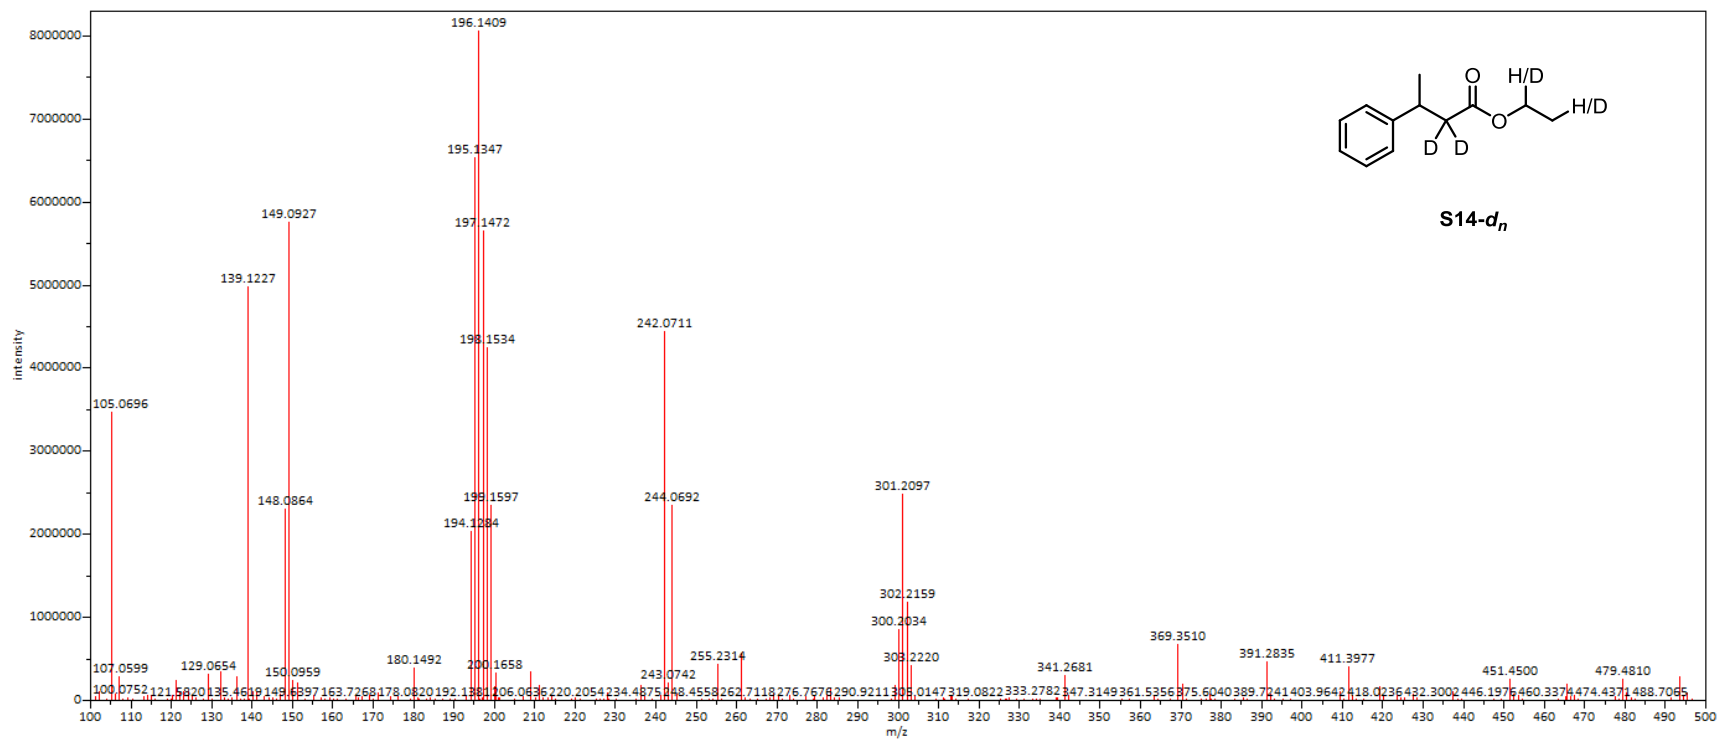

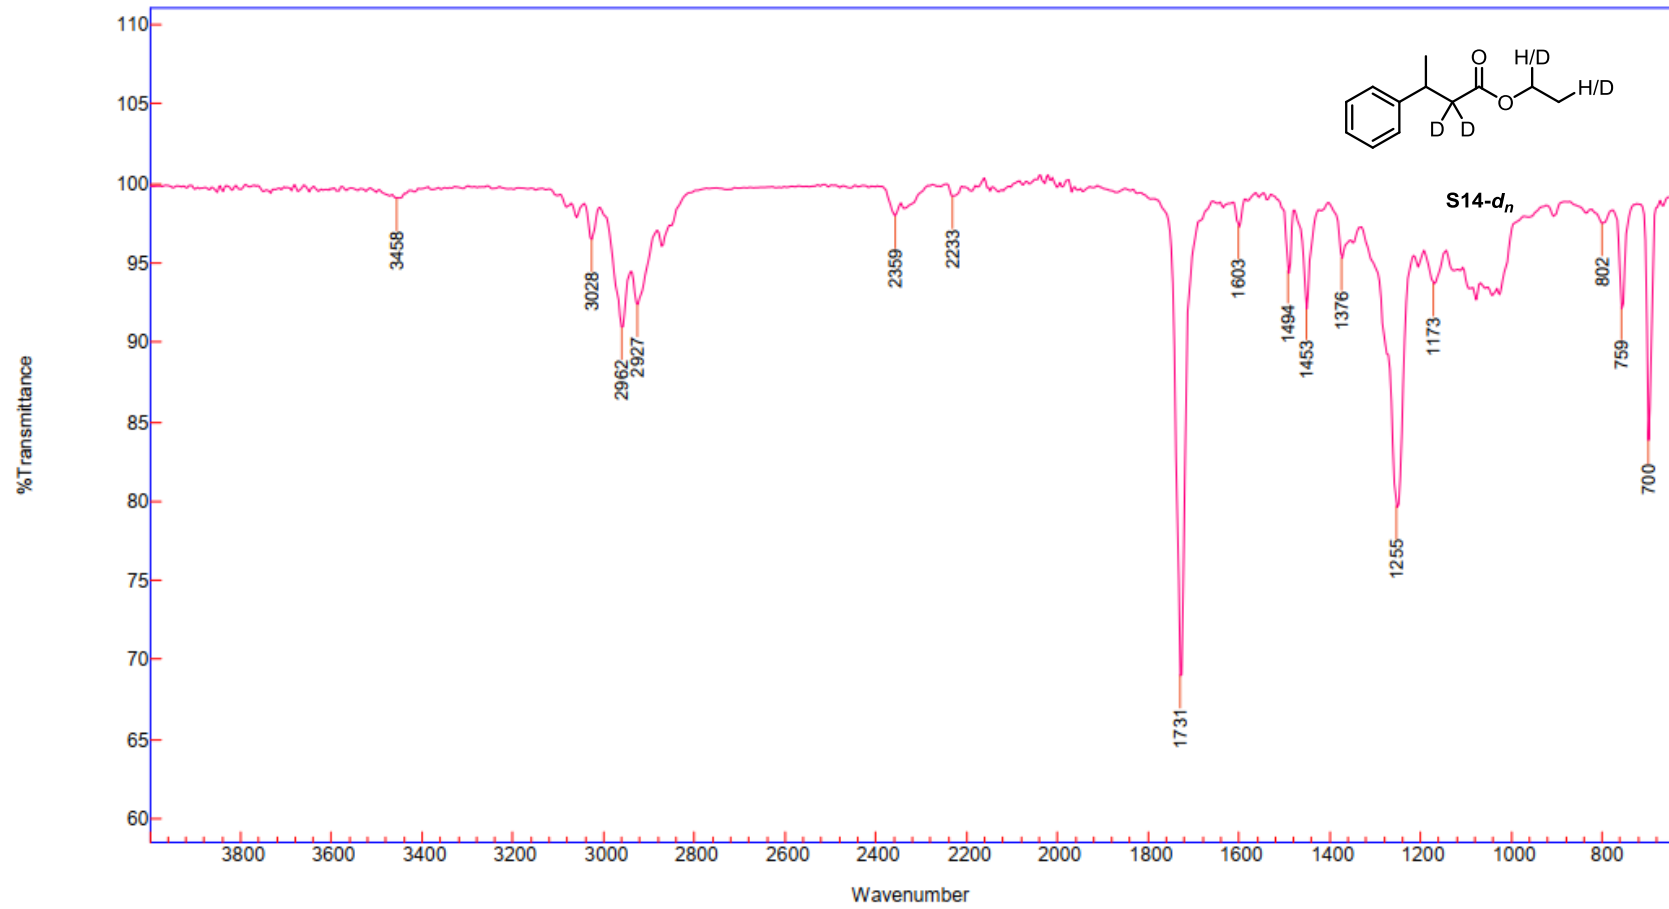

S332



Ethyl (*E*)-3-phenylbut-2-enoate (1)

<sup>1</sup>H NMR

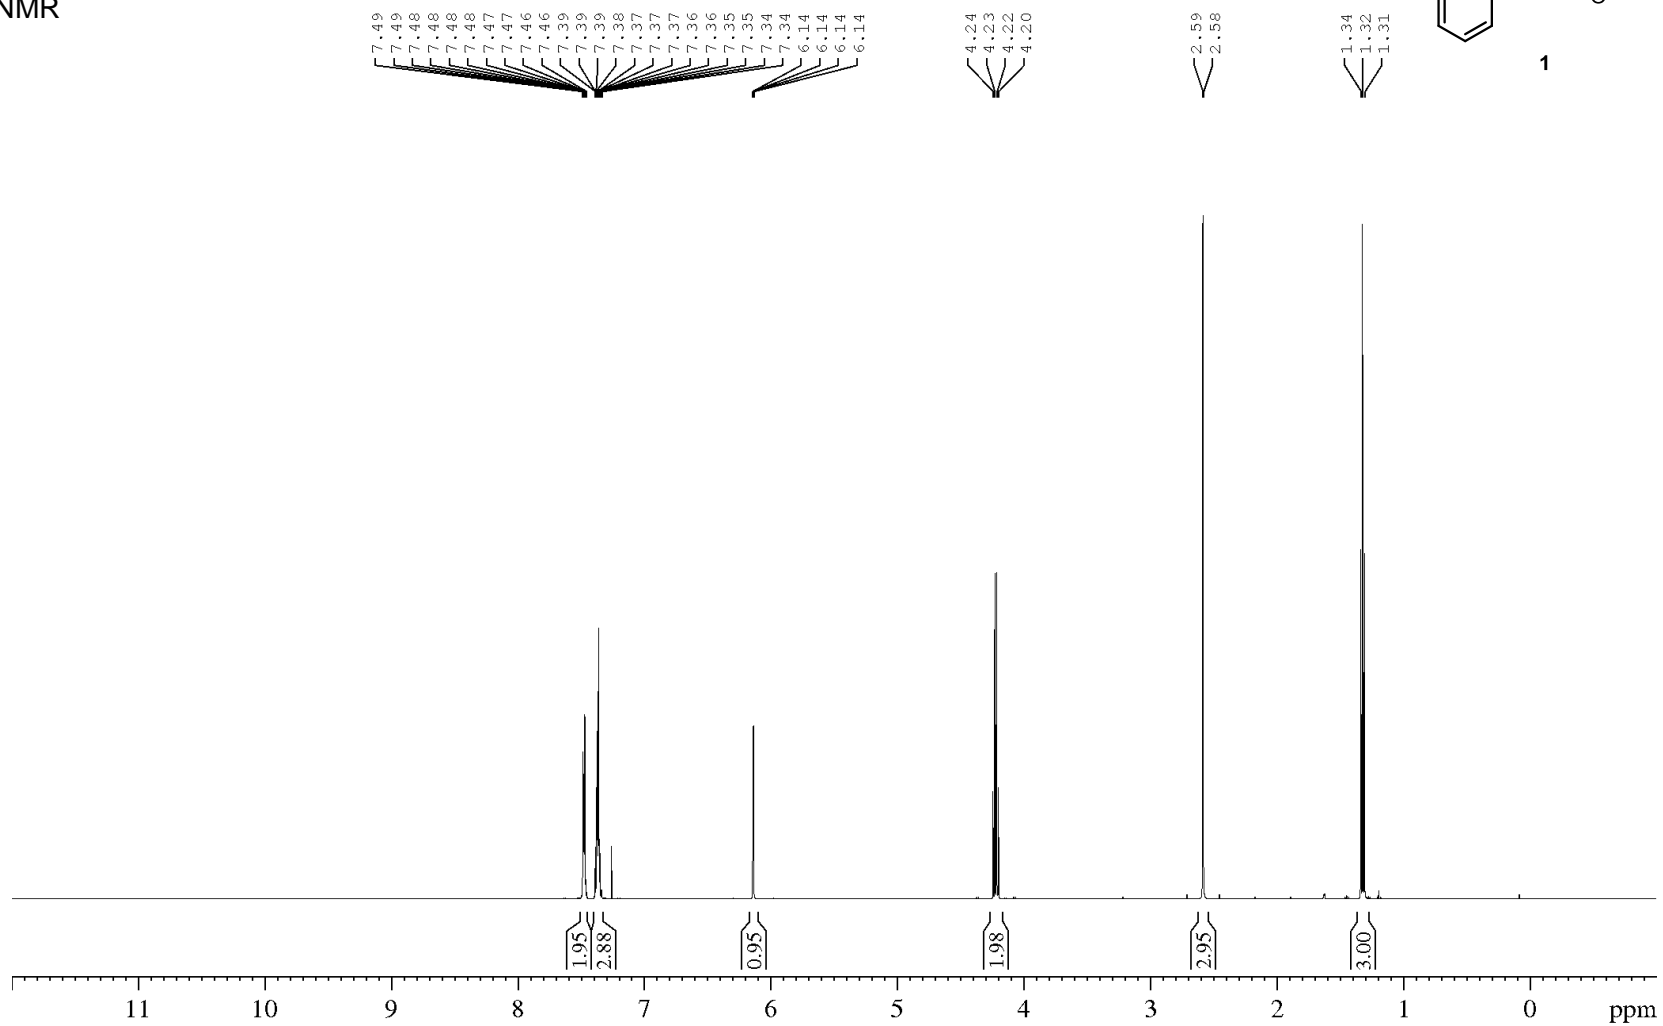

<sup>13</sup>C NMR

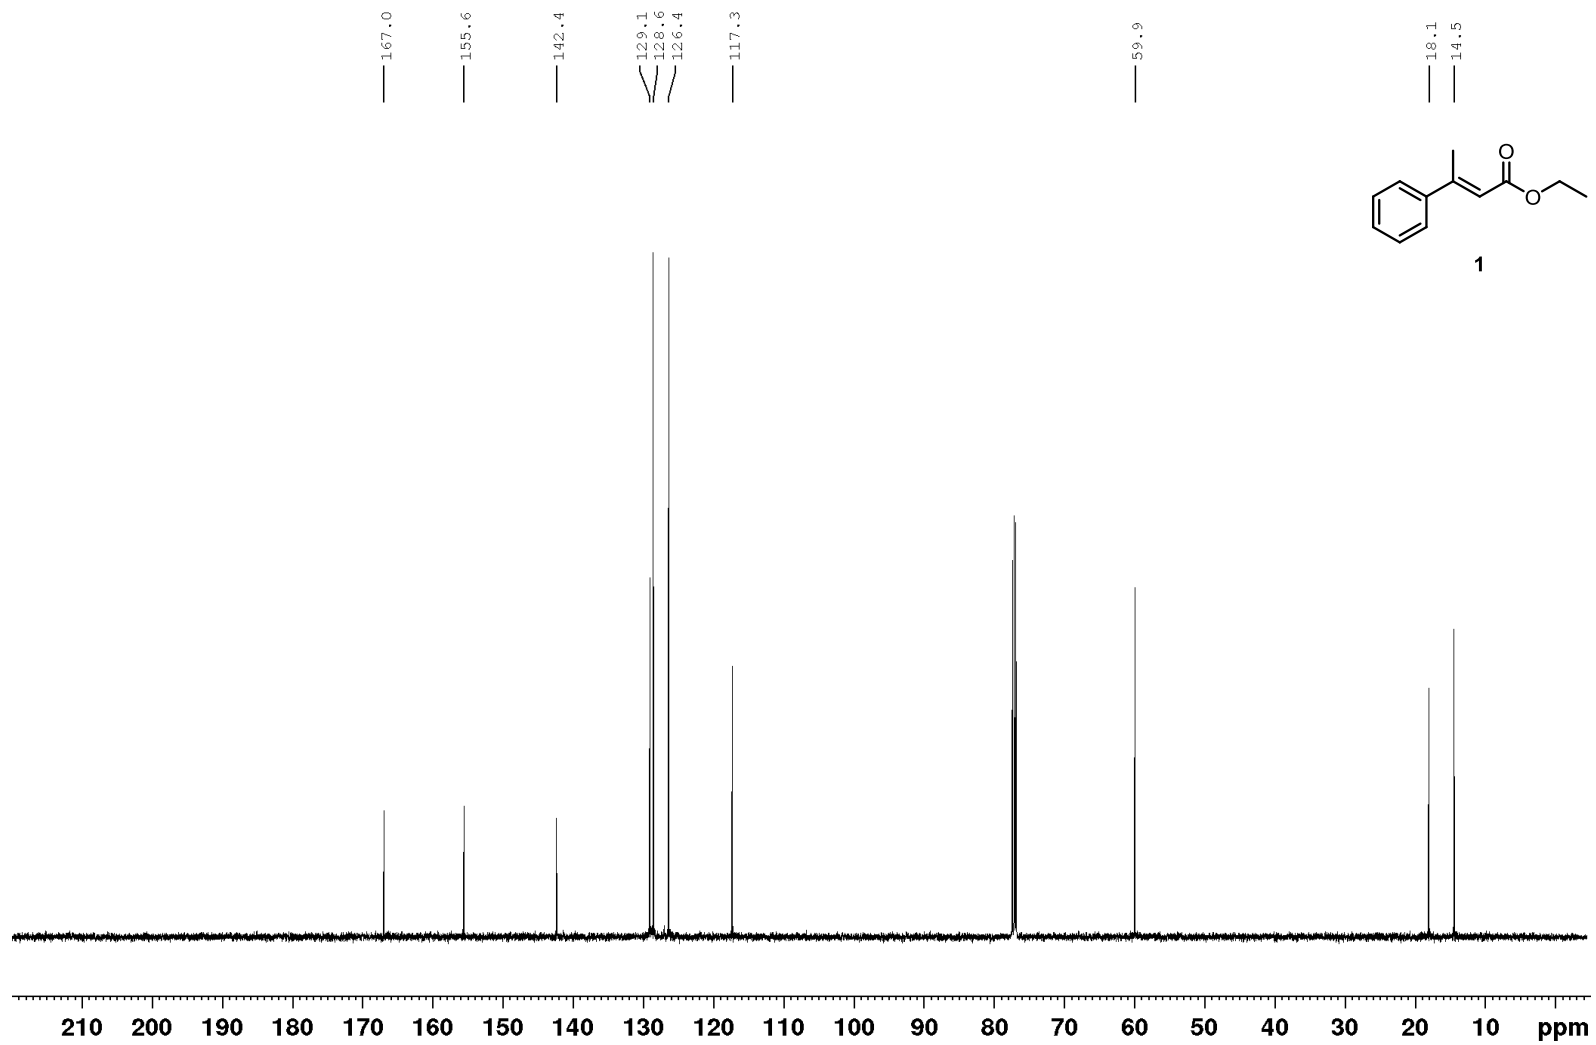

$^{13}\text{C}$  DEPT NMR

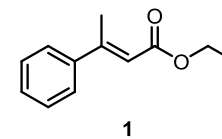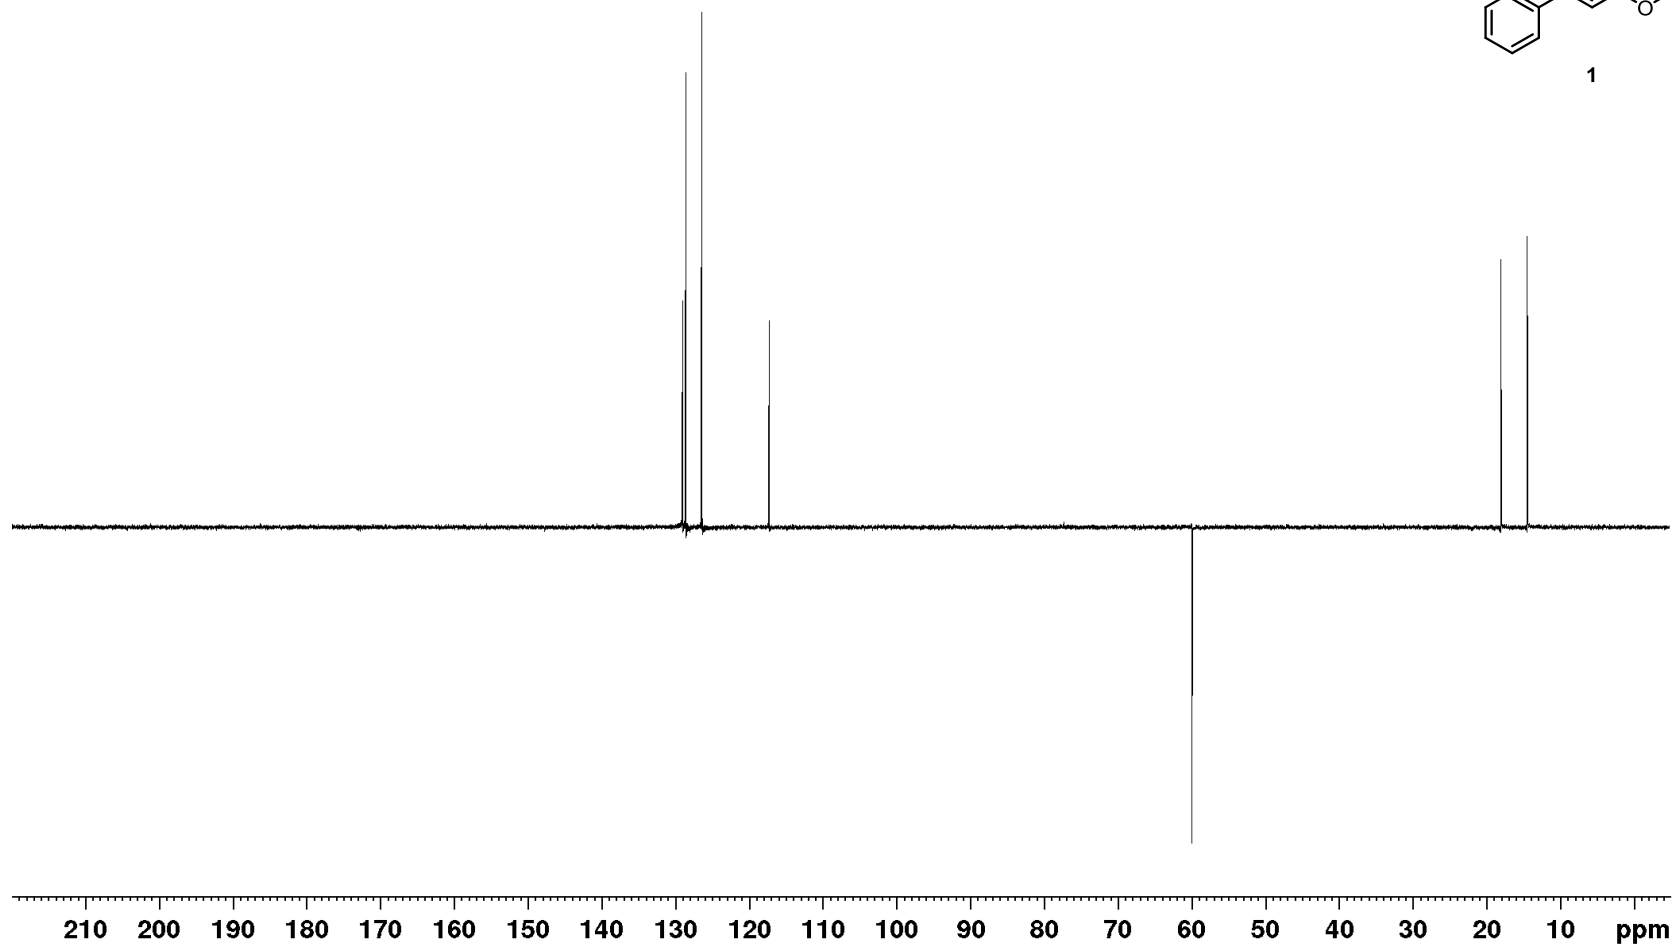

$^1\text{H}$ - $^{13}\text{C}$  HMQC

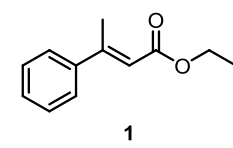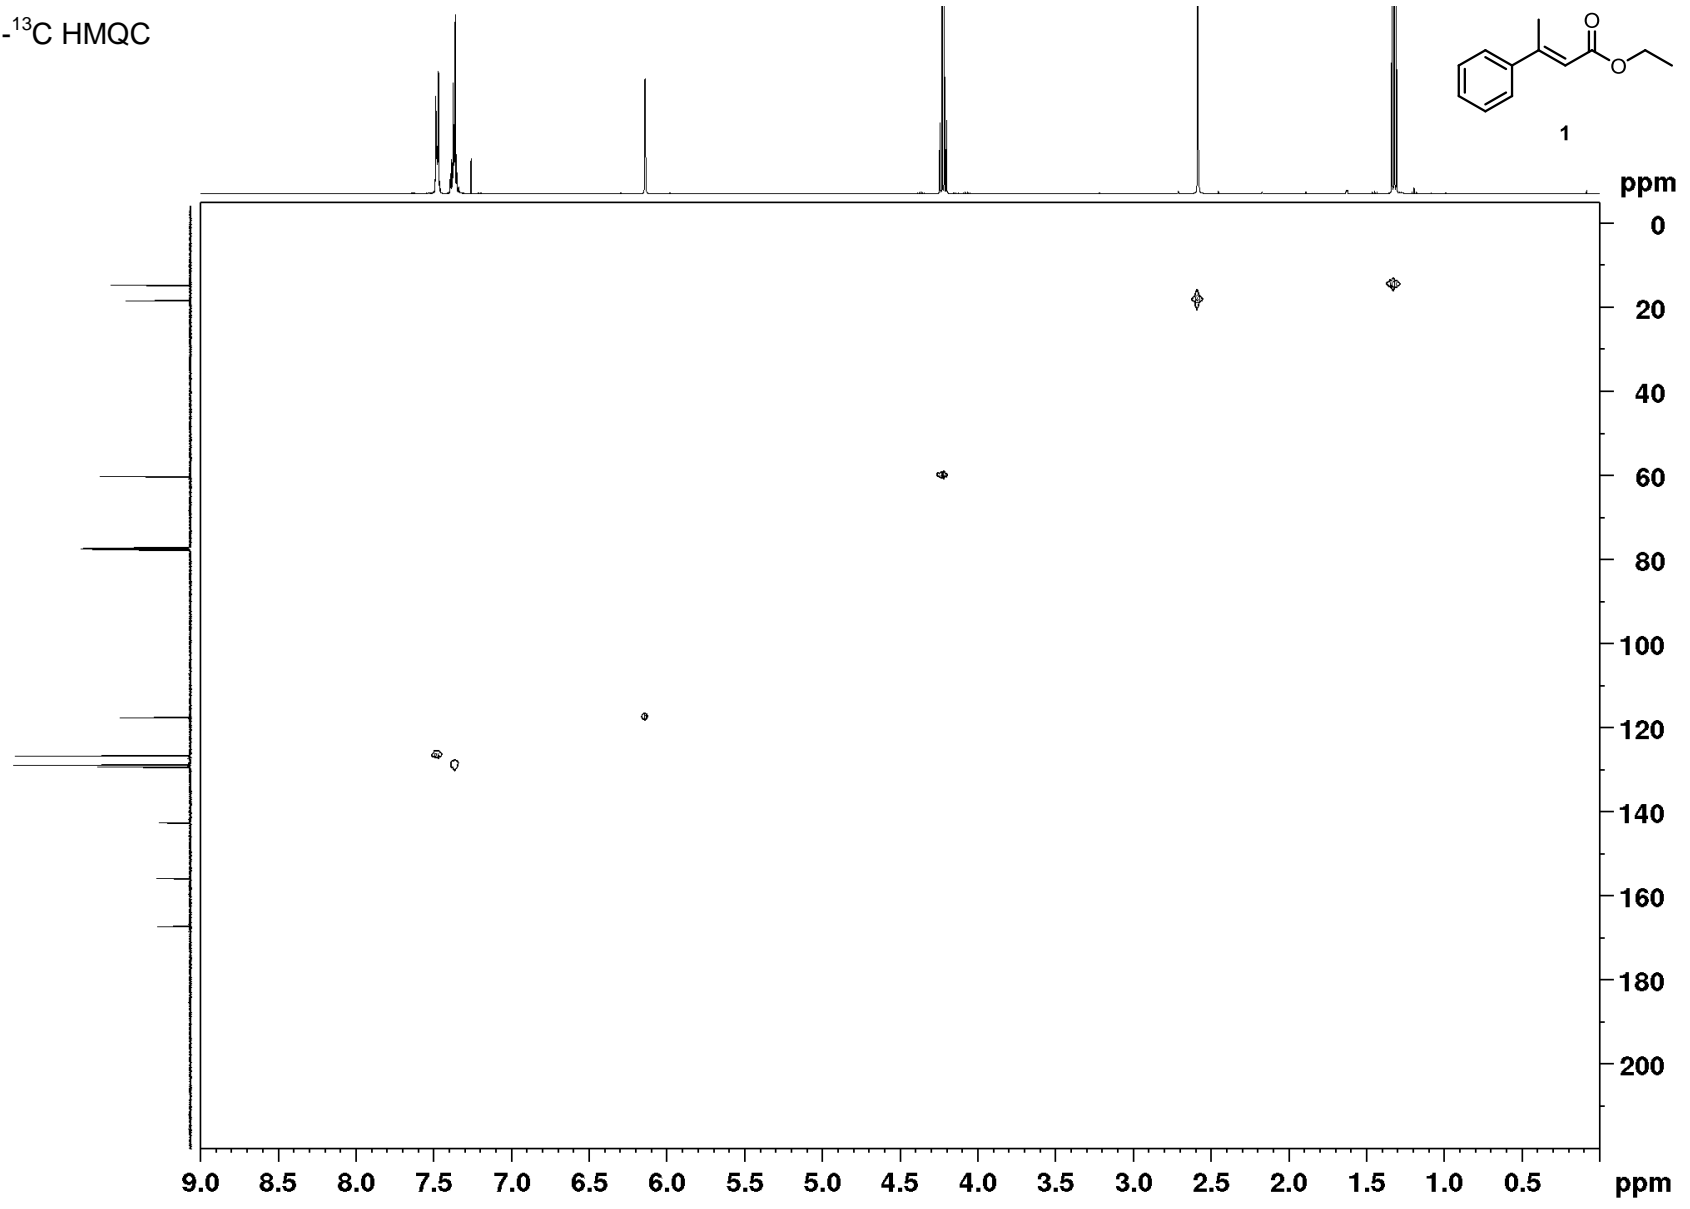

$^1\text{H}$ - $^{13}\text{C}$  HMBC

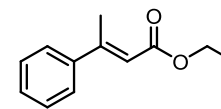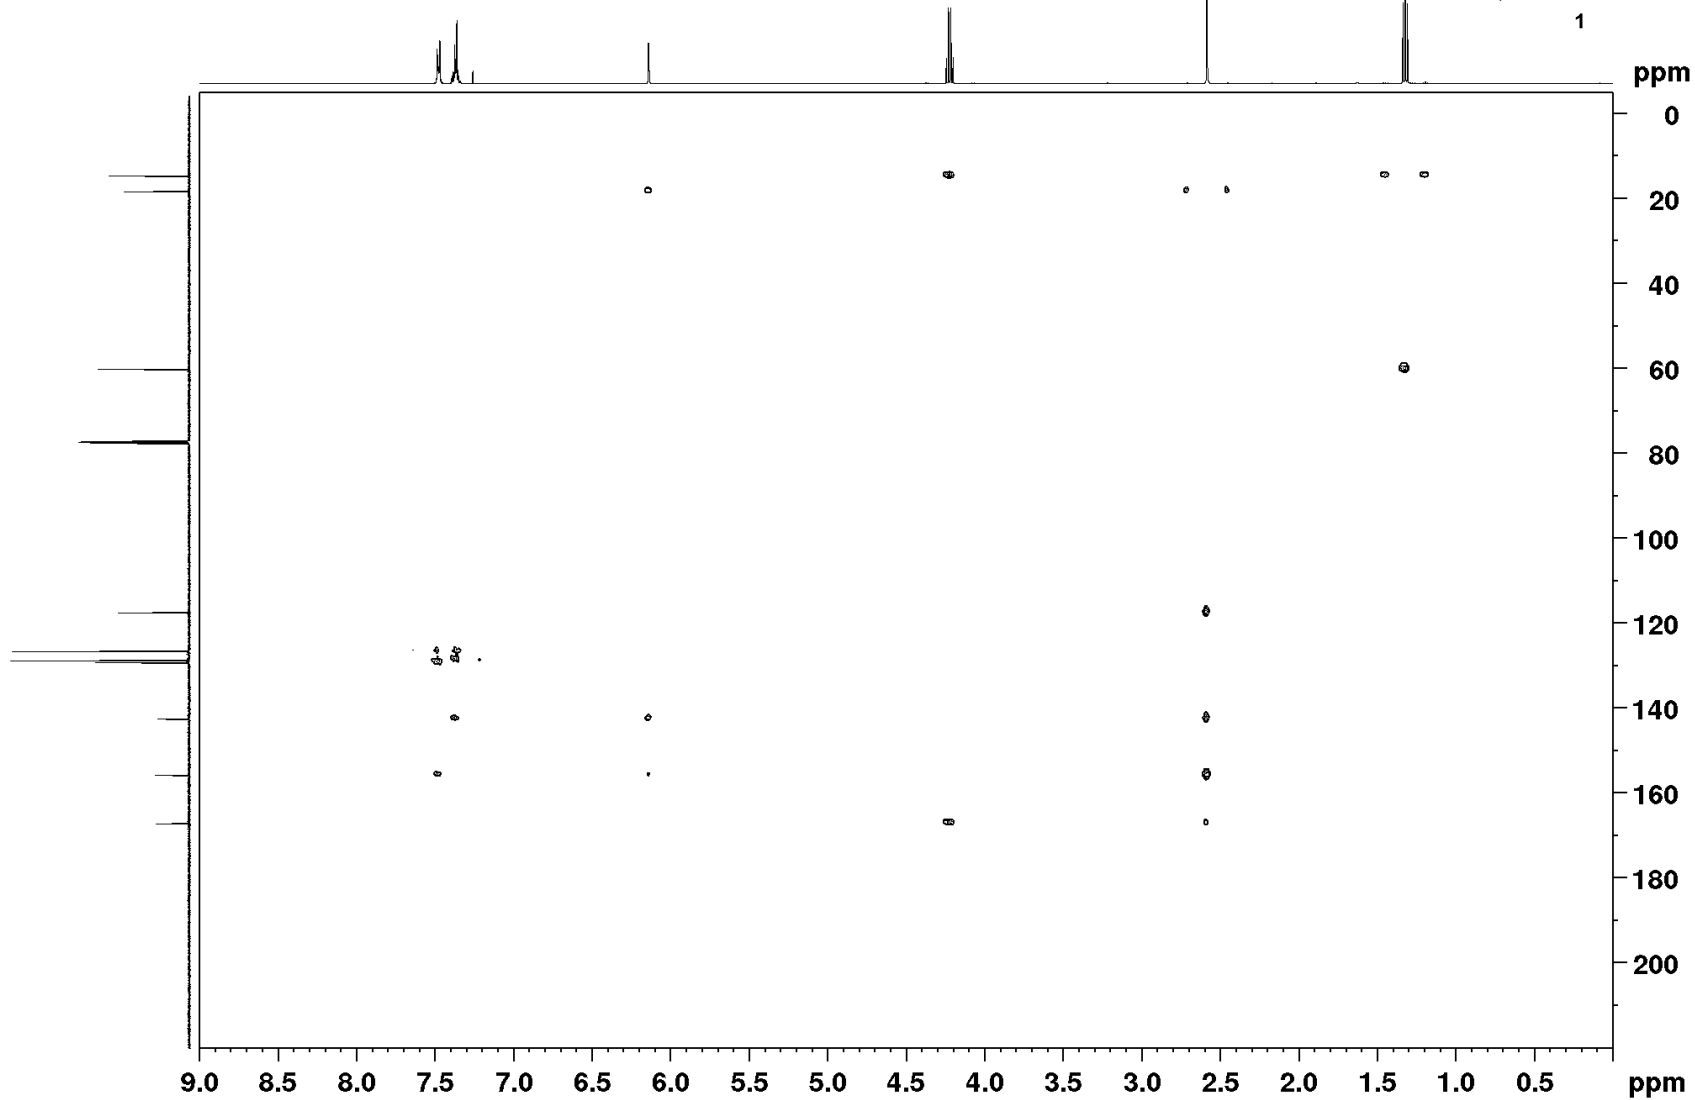

<sup>1</sup>H-<sup>1</sup>H COSY

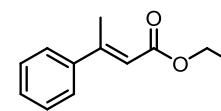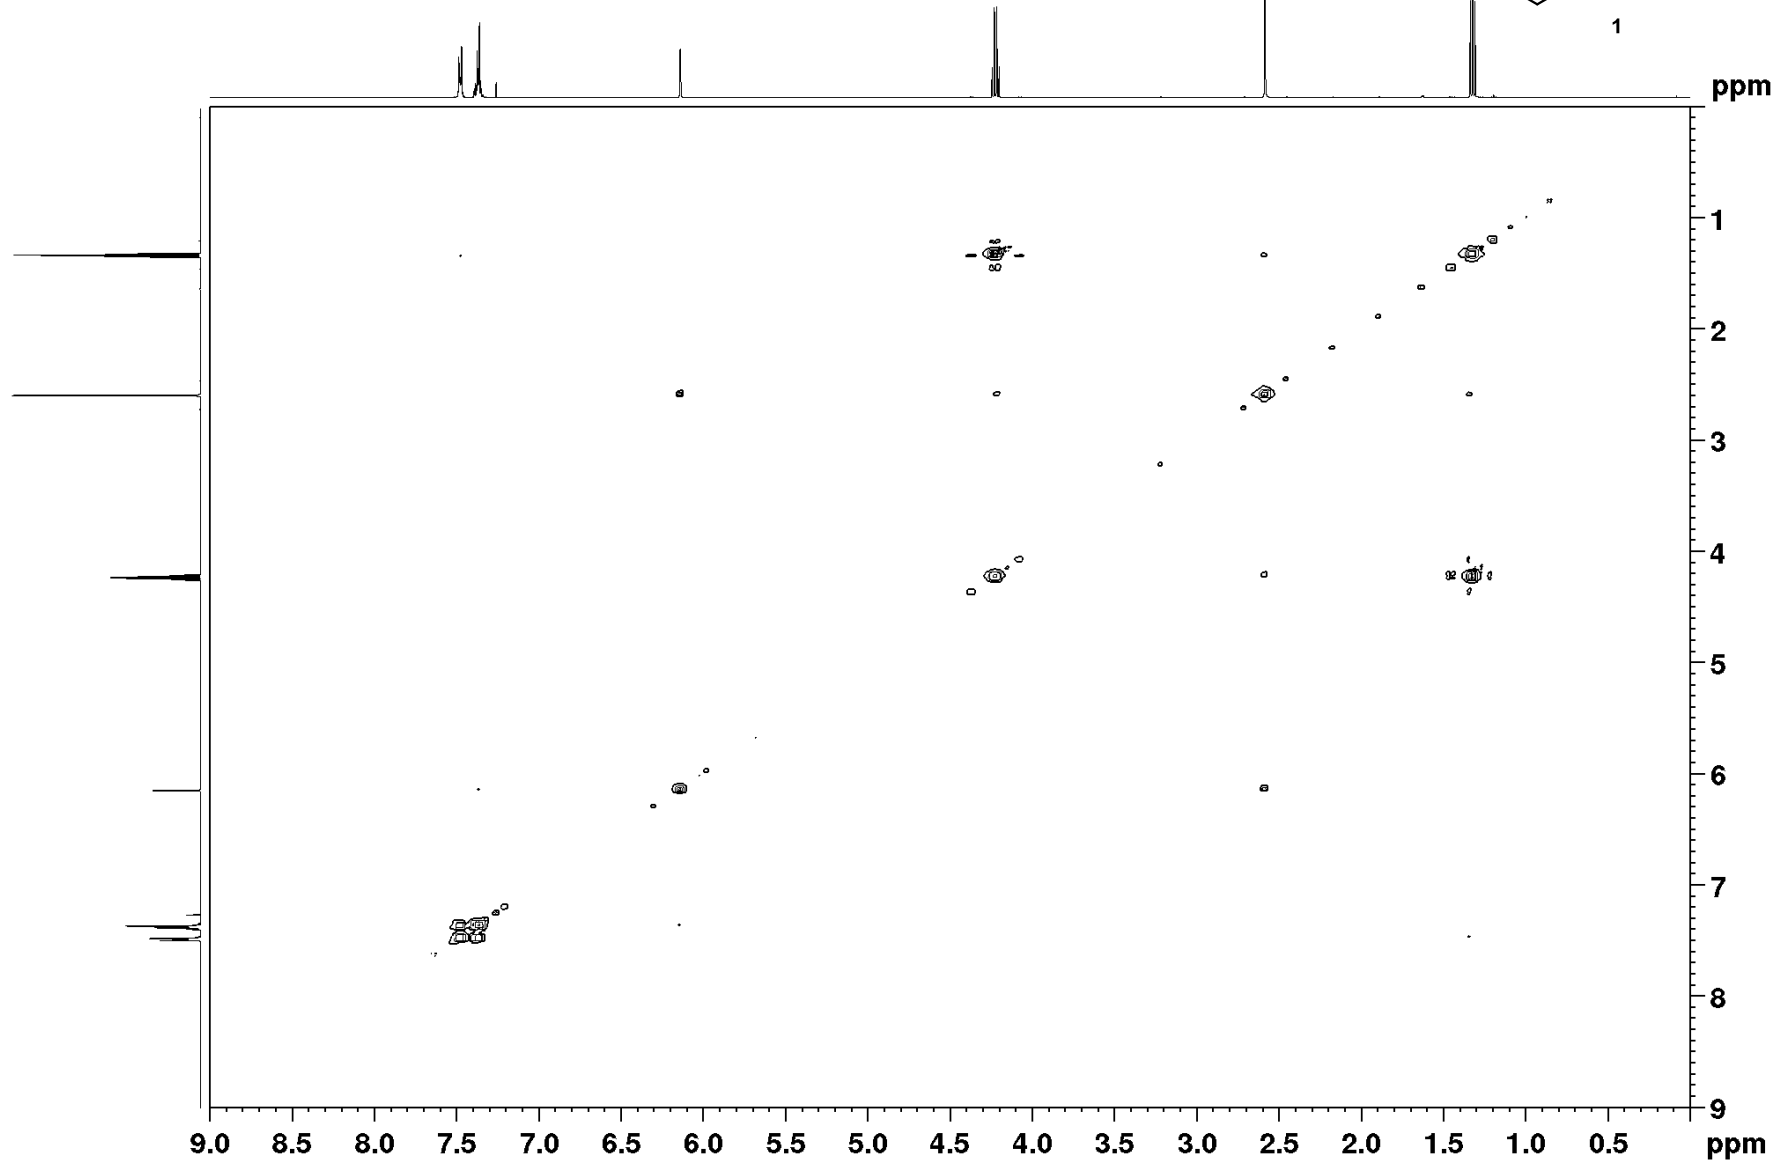

S338

$^1\text{H}$ - $^1\text{H}$  NOESY

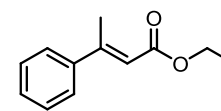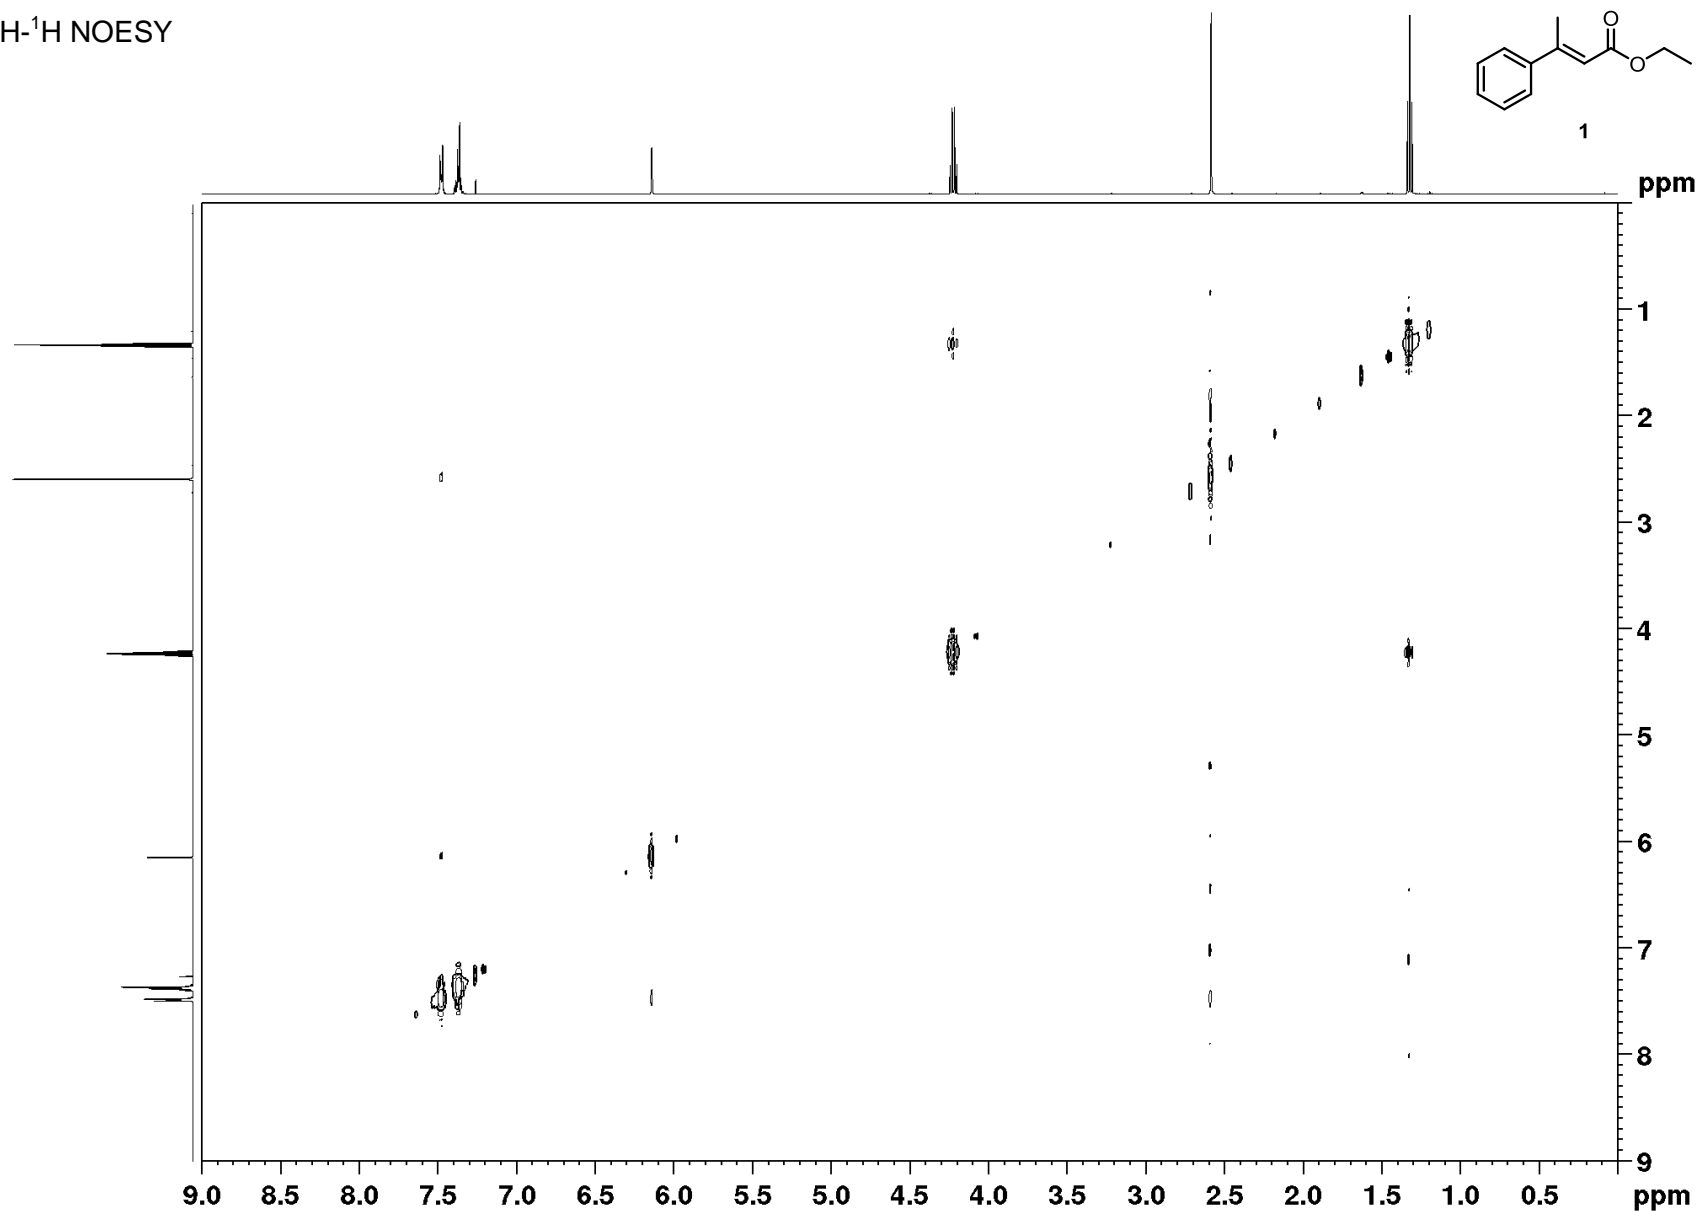

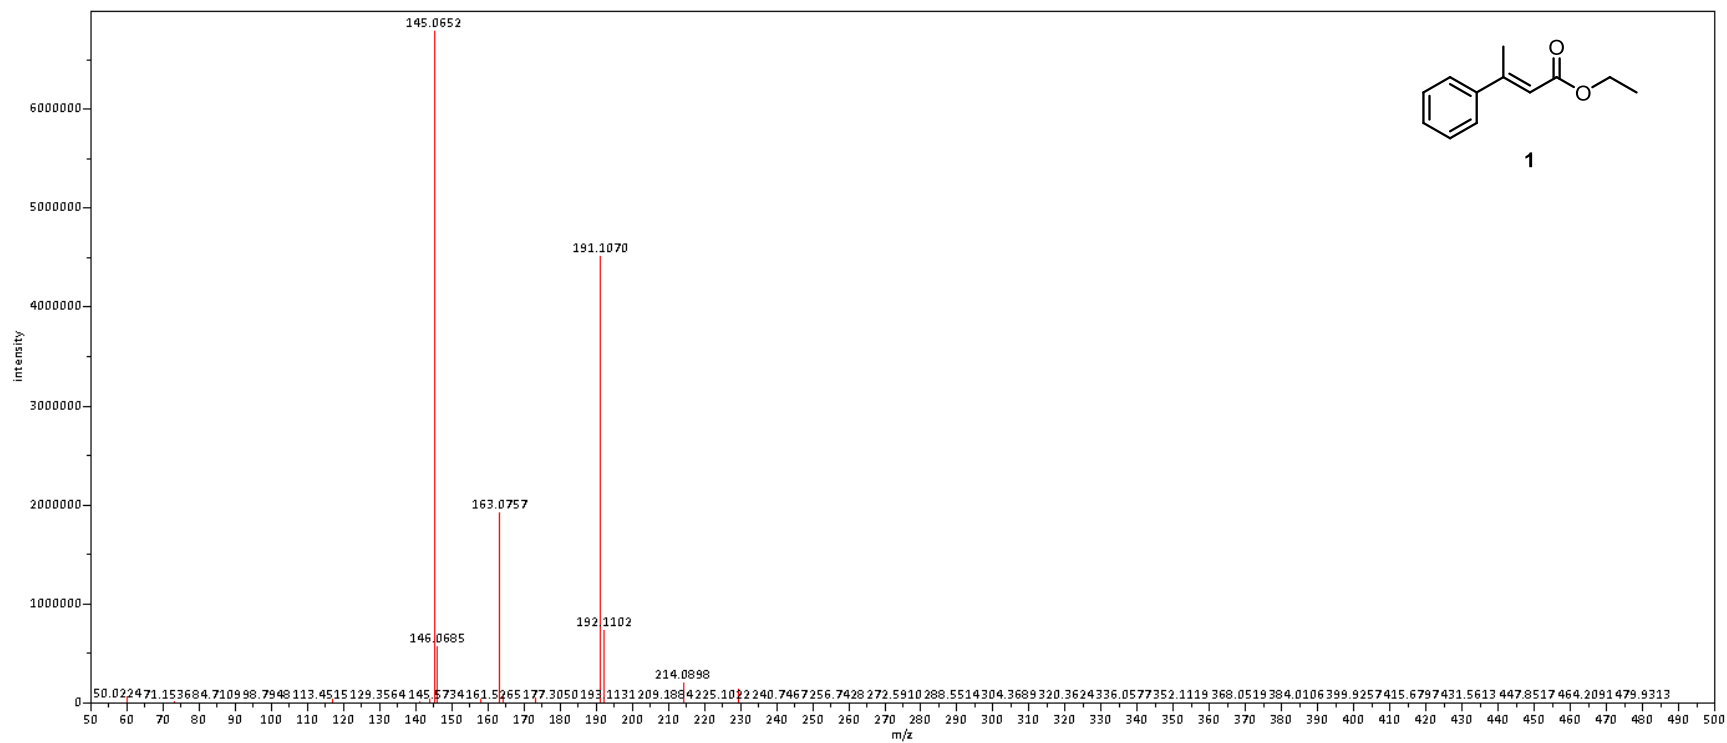



Ethyl (*E*)-3-(naphthalen-2-yl)but-2-enoate (**8a**)

<sup>1</sup>H NMR

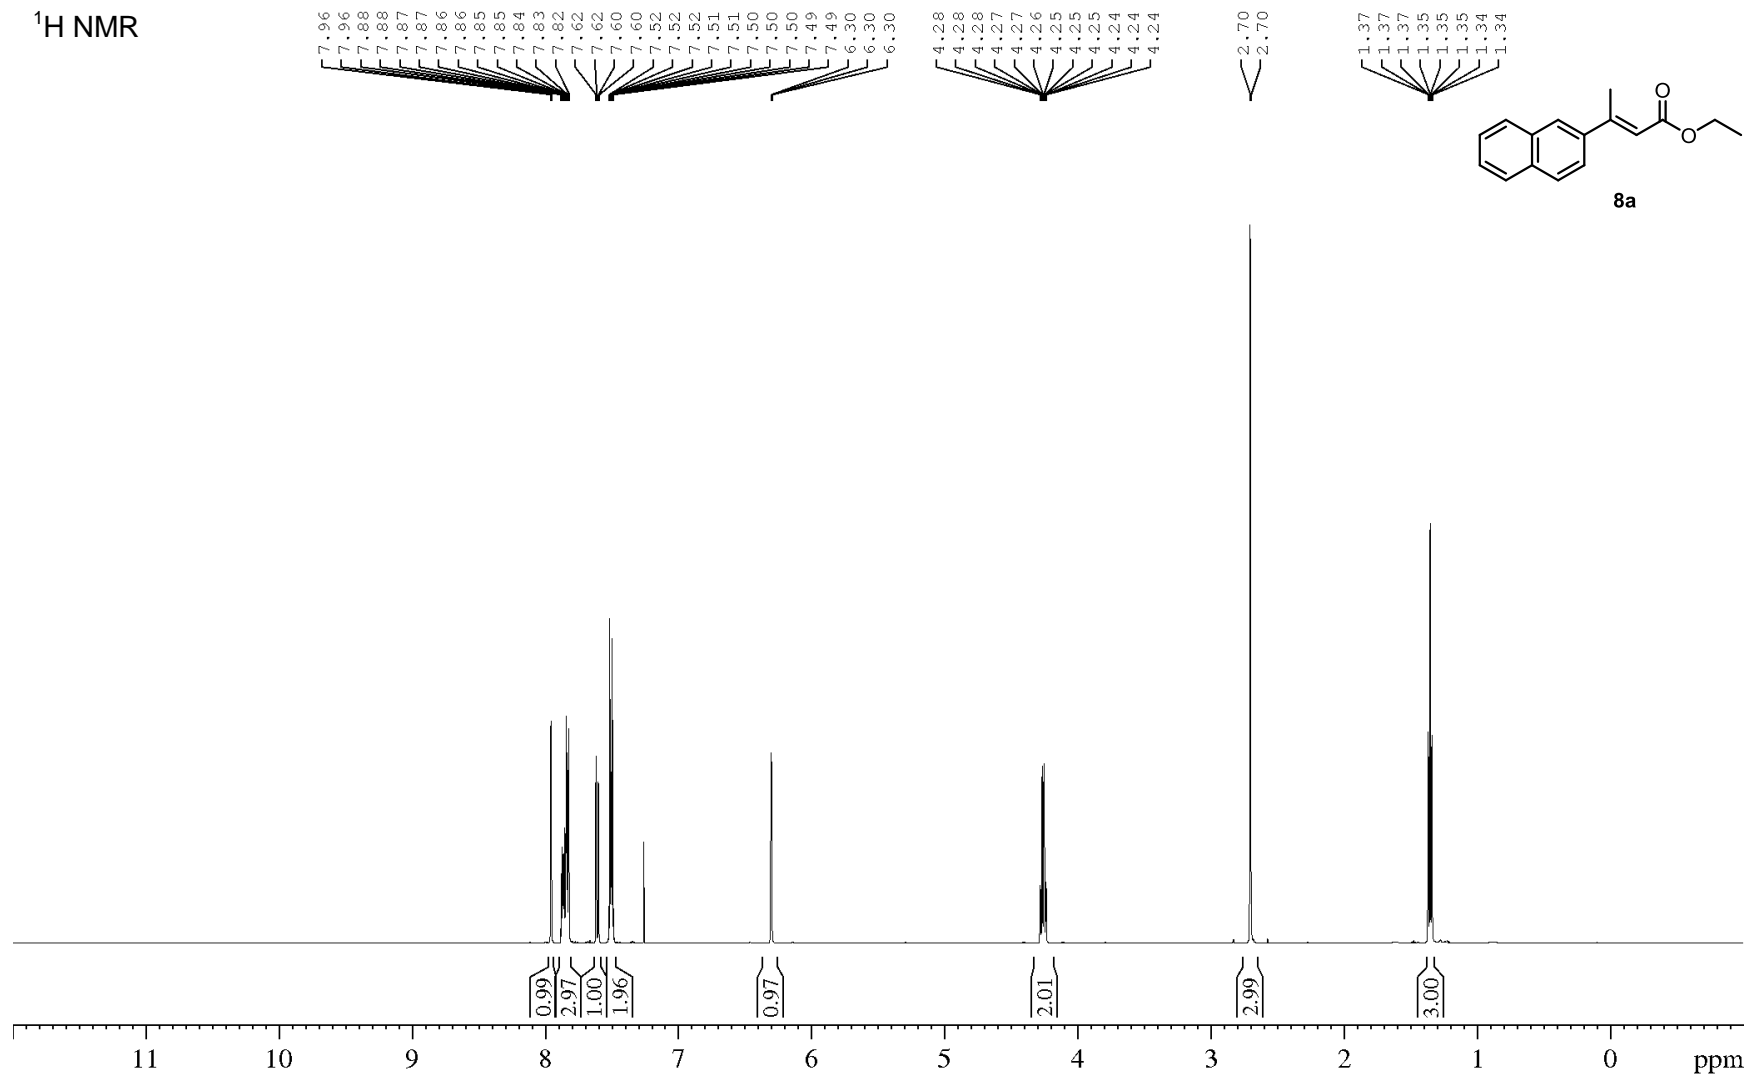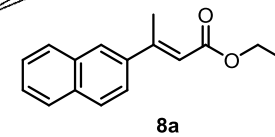

<sup>13</sup>C NMR

167.0

155.3

139.5

133.6

133.3

128.6

128.3

127.7

126.8

126.1

124.1

117.7

60.0

18.0

14.5

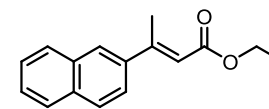

8a

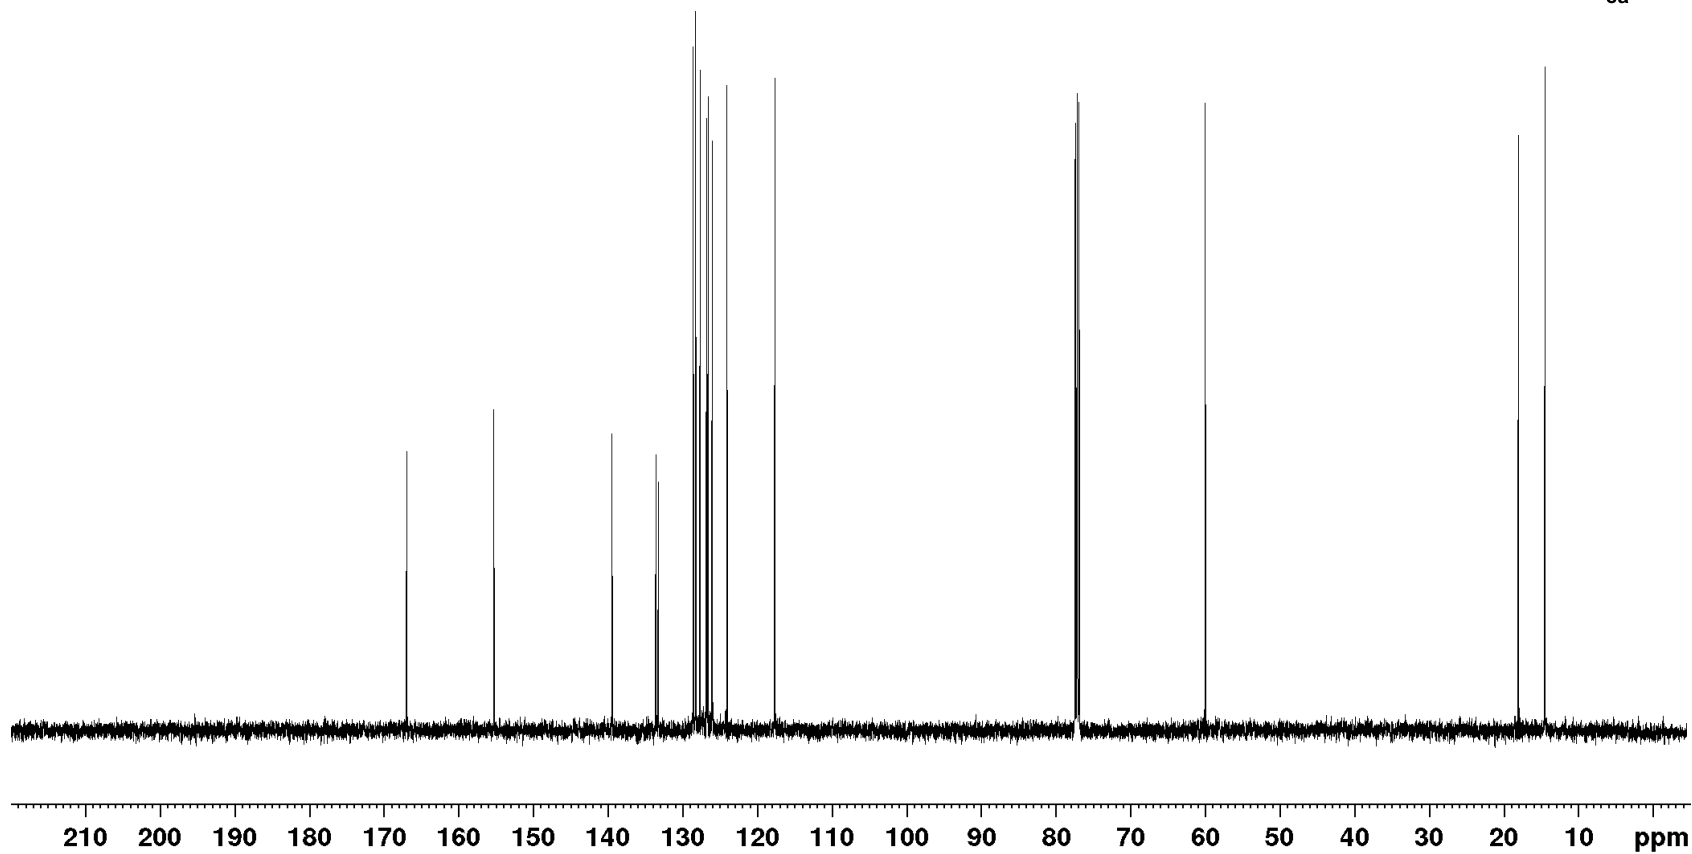

<sup>13</sup>C DEPT NMR

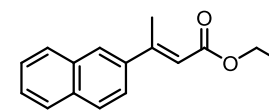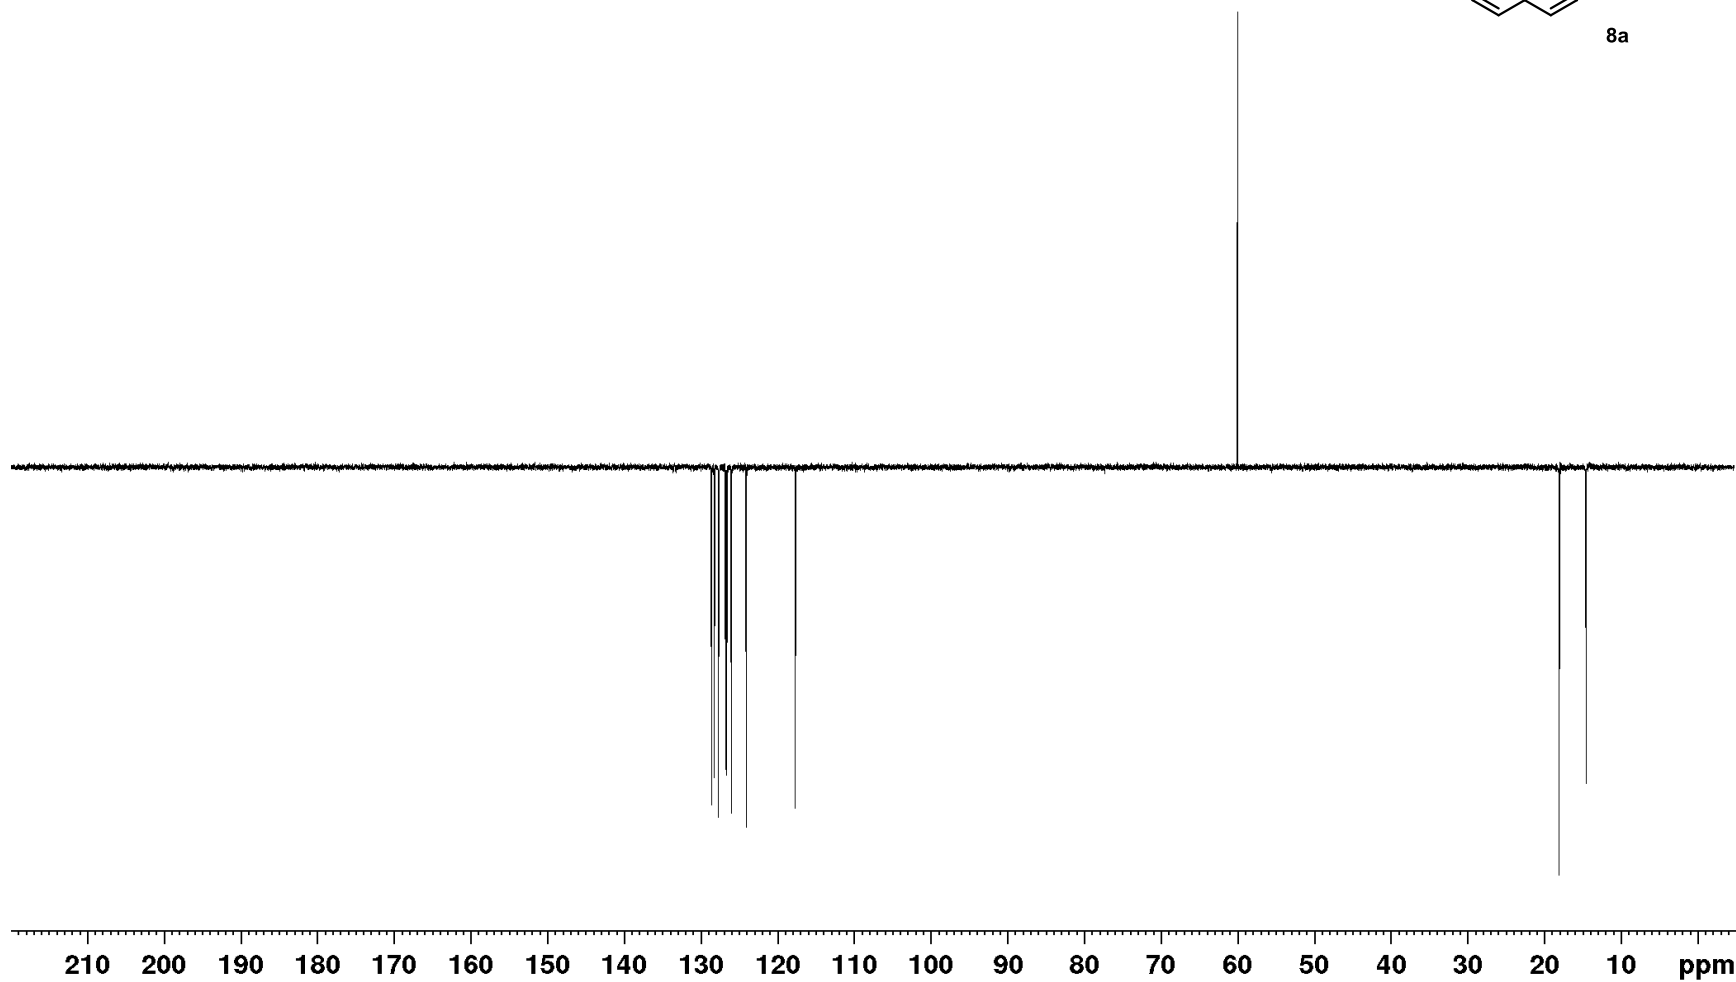

$^1\text{H}$ - $^{13}\text{C}$  HMQC

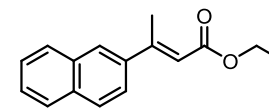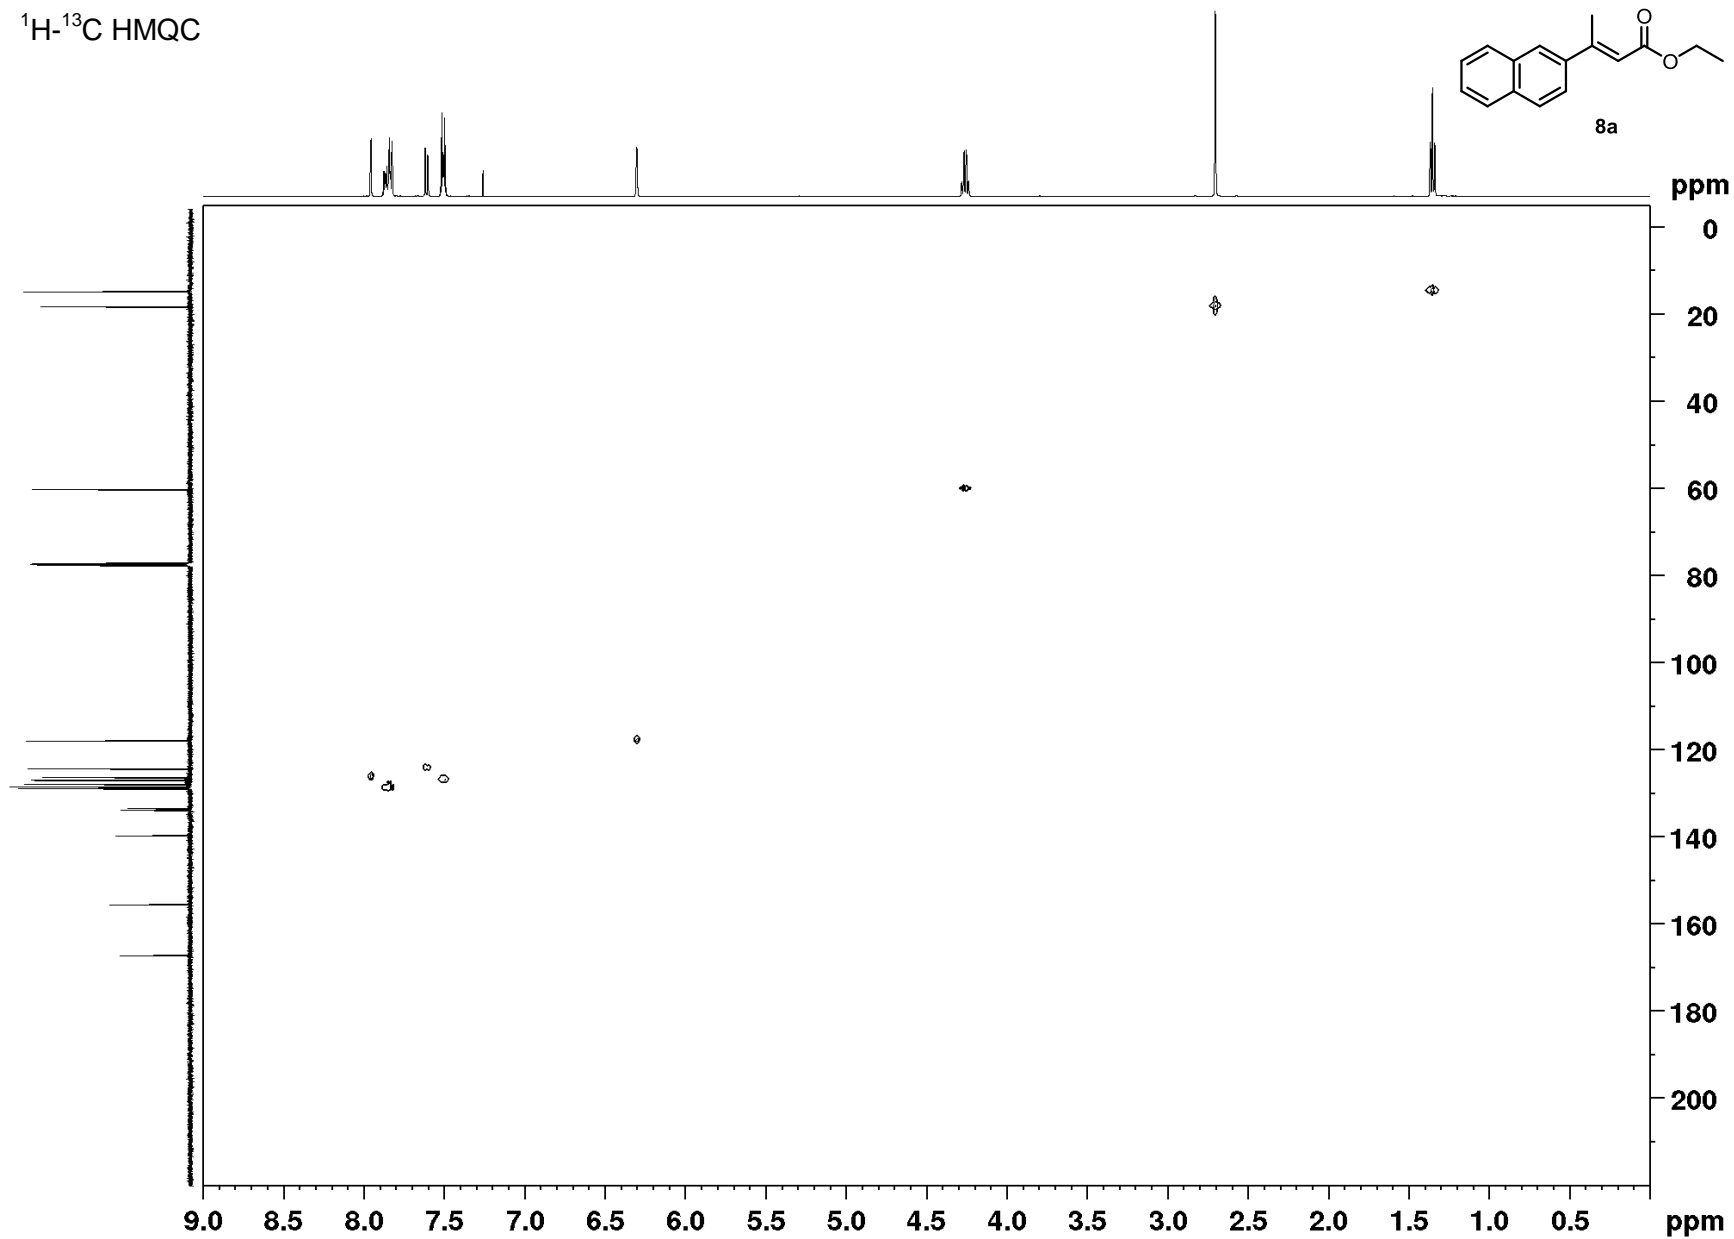

$^1\text{H}$ - $^{13}\text{C}$  HMBC

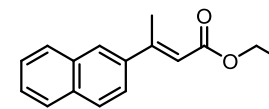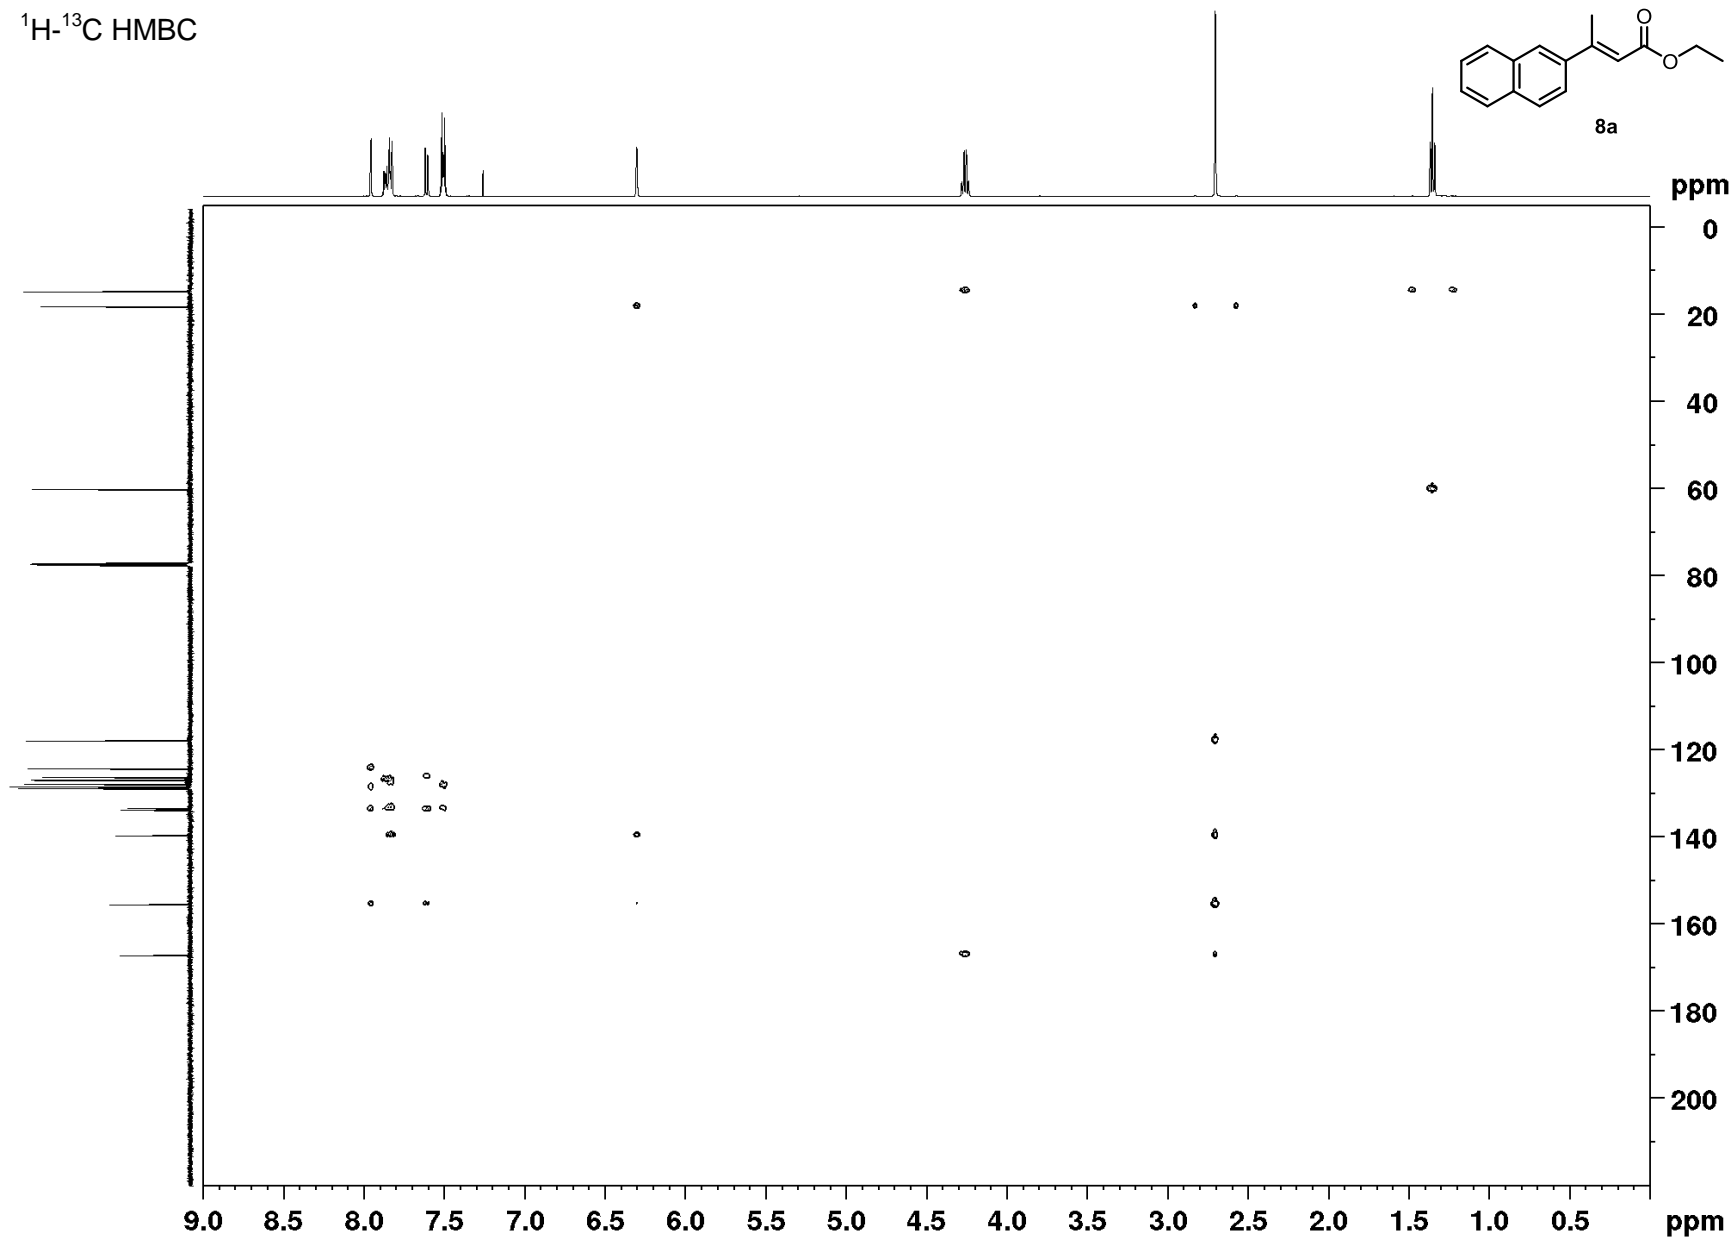

$^1\text{H}$ - $^1\text{H}$  COSY

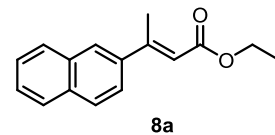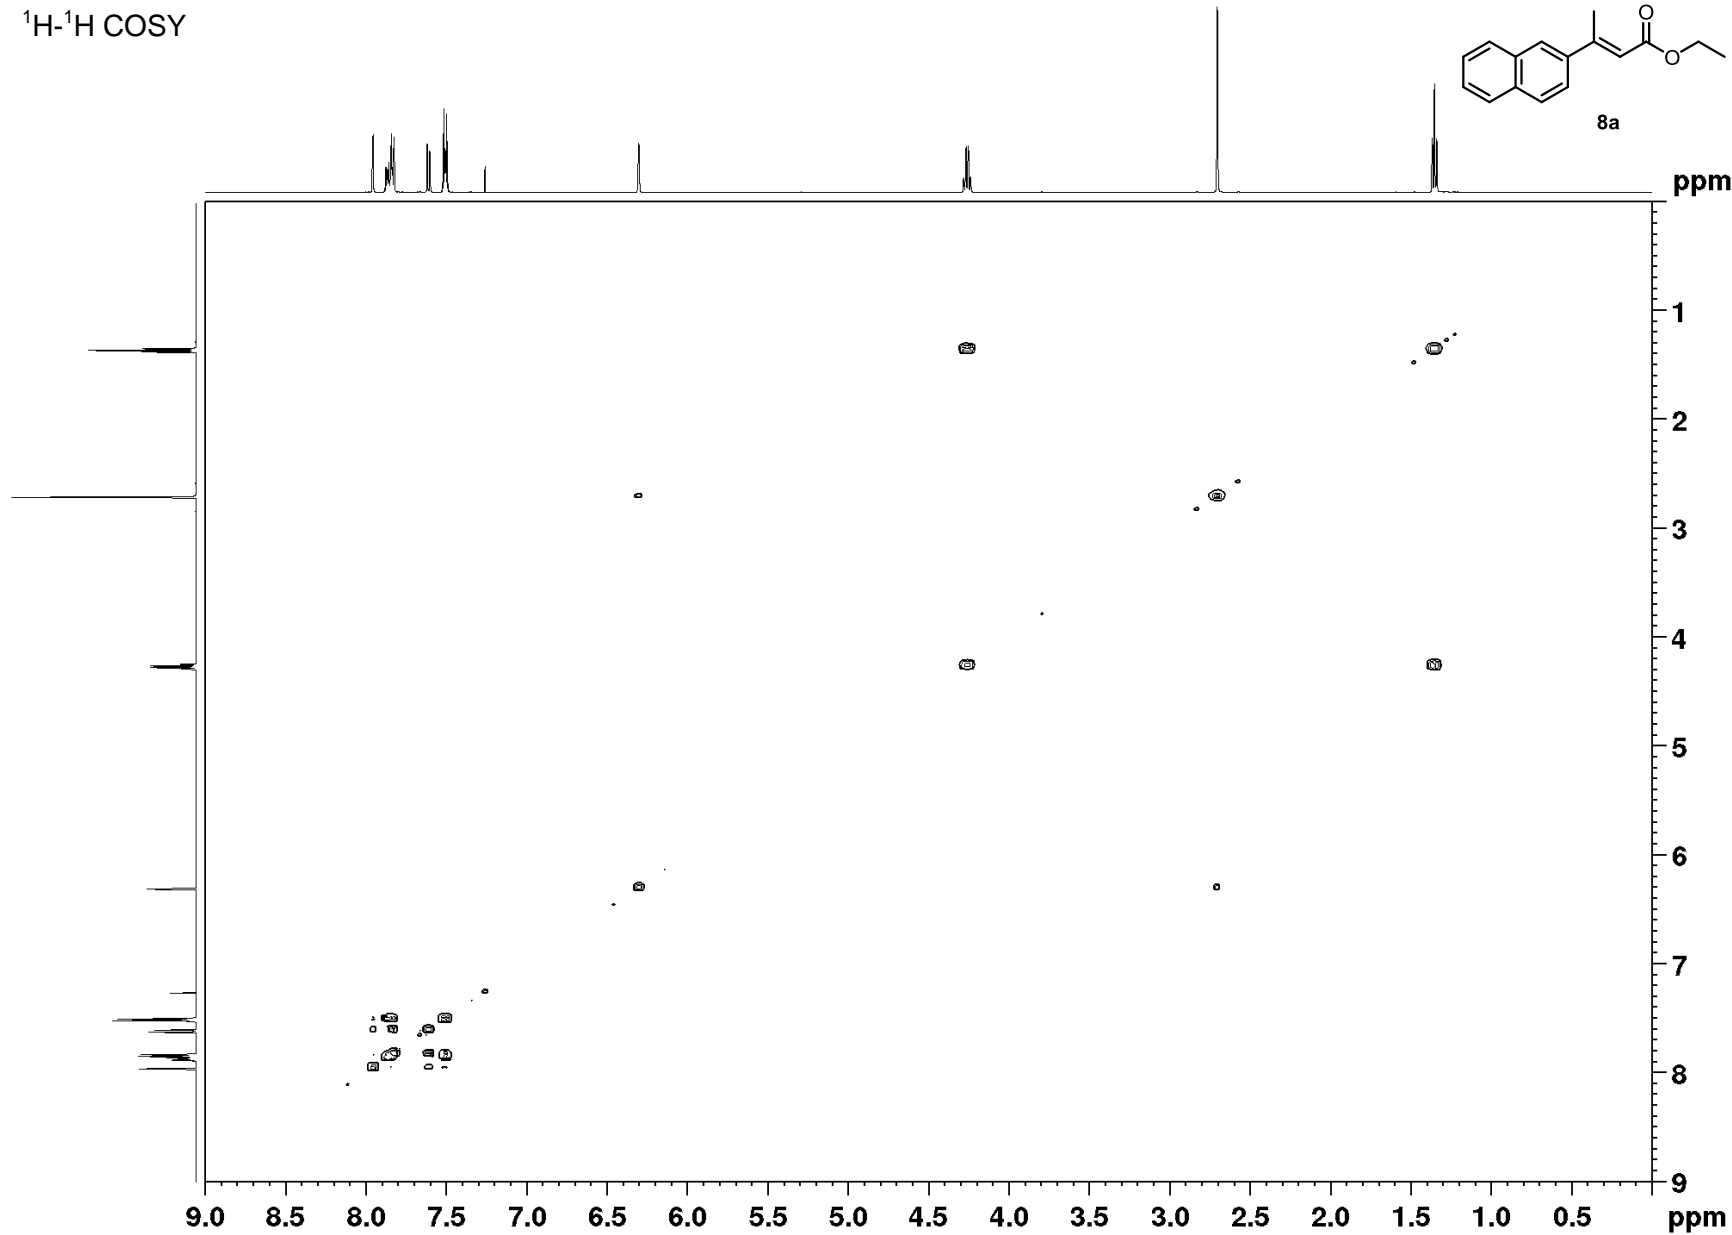

$^1\text{H}$ - $^1\text{H}$  NOESY

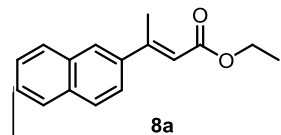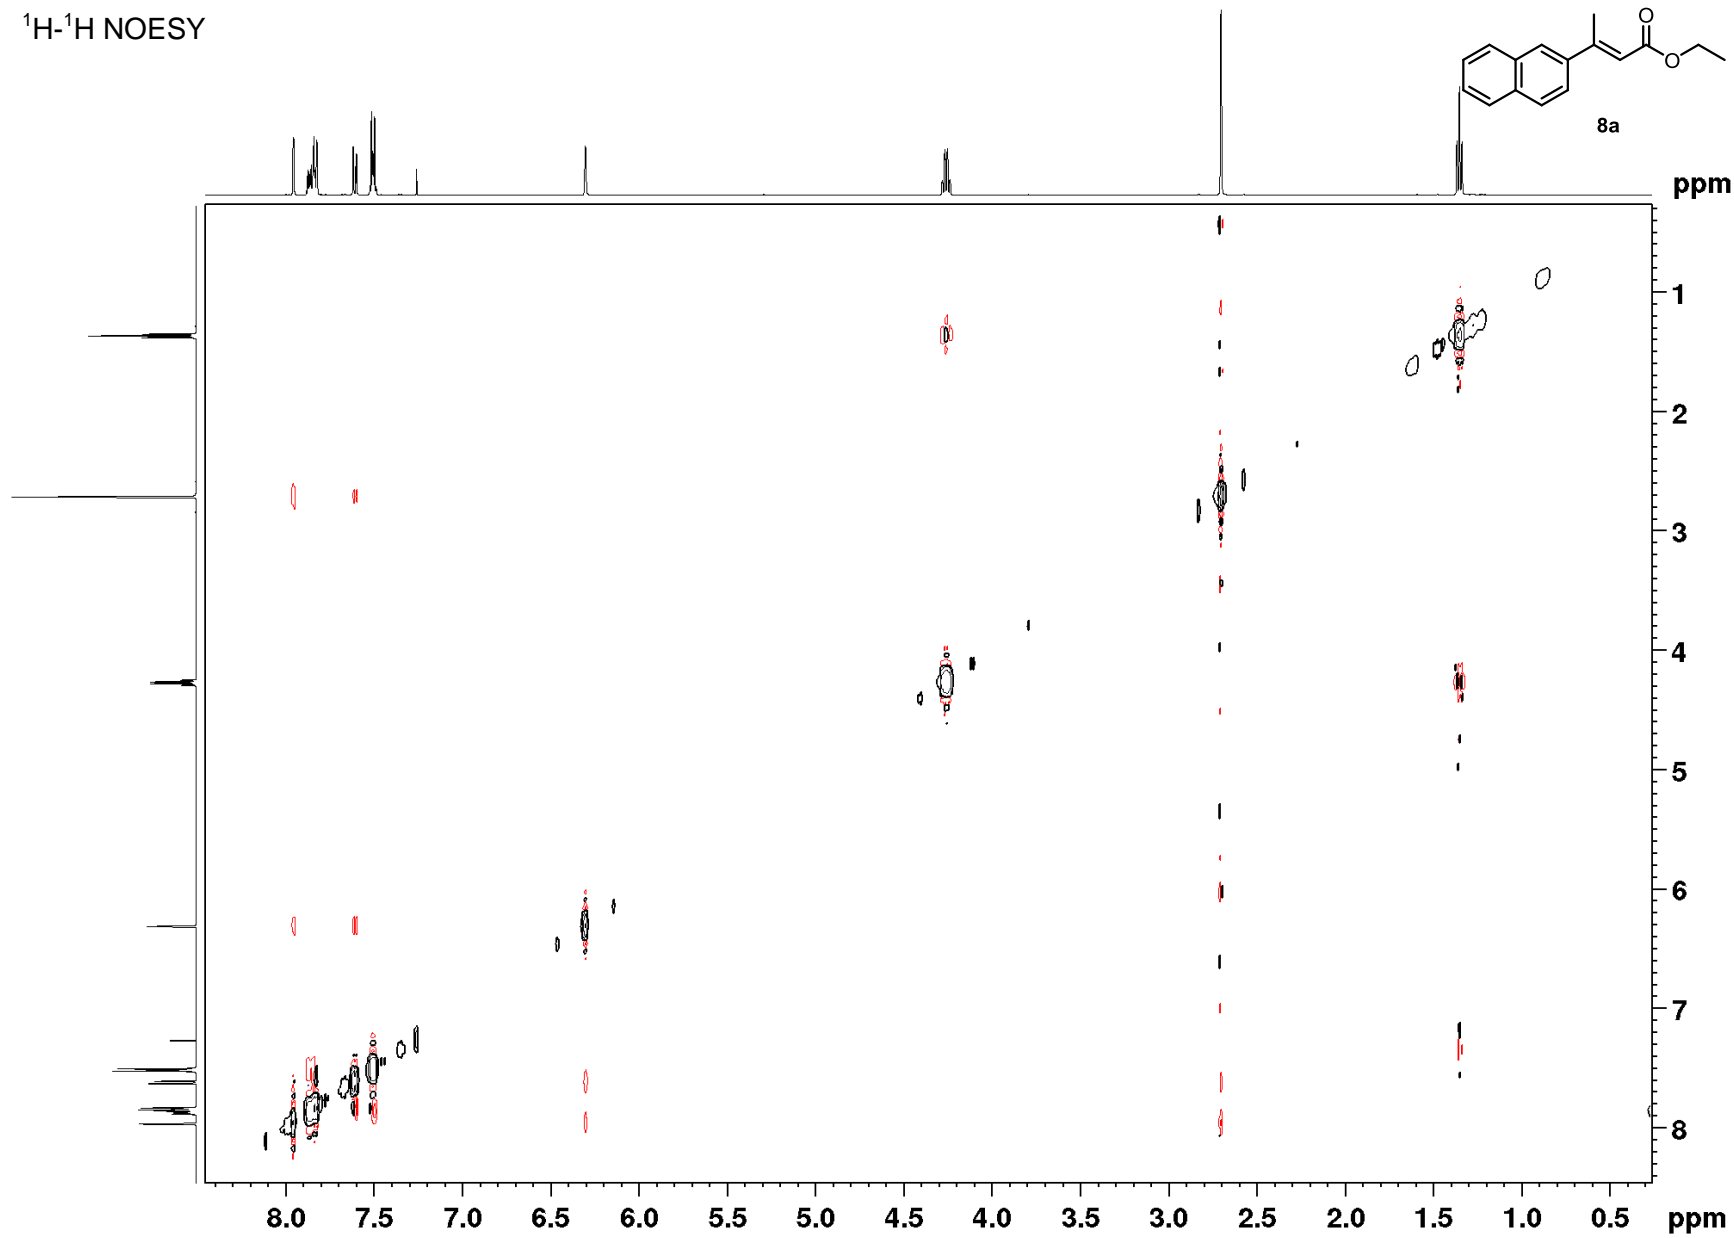

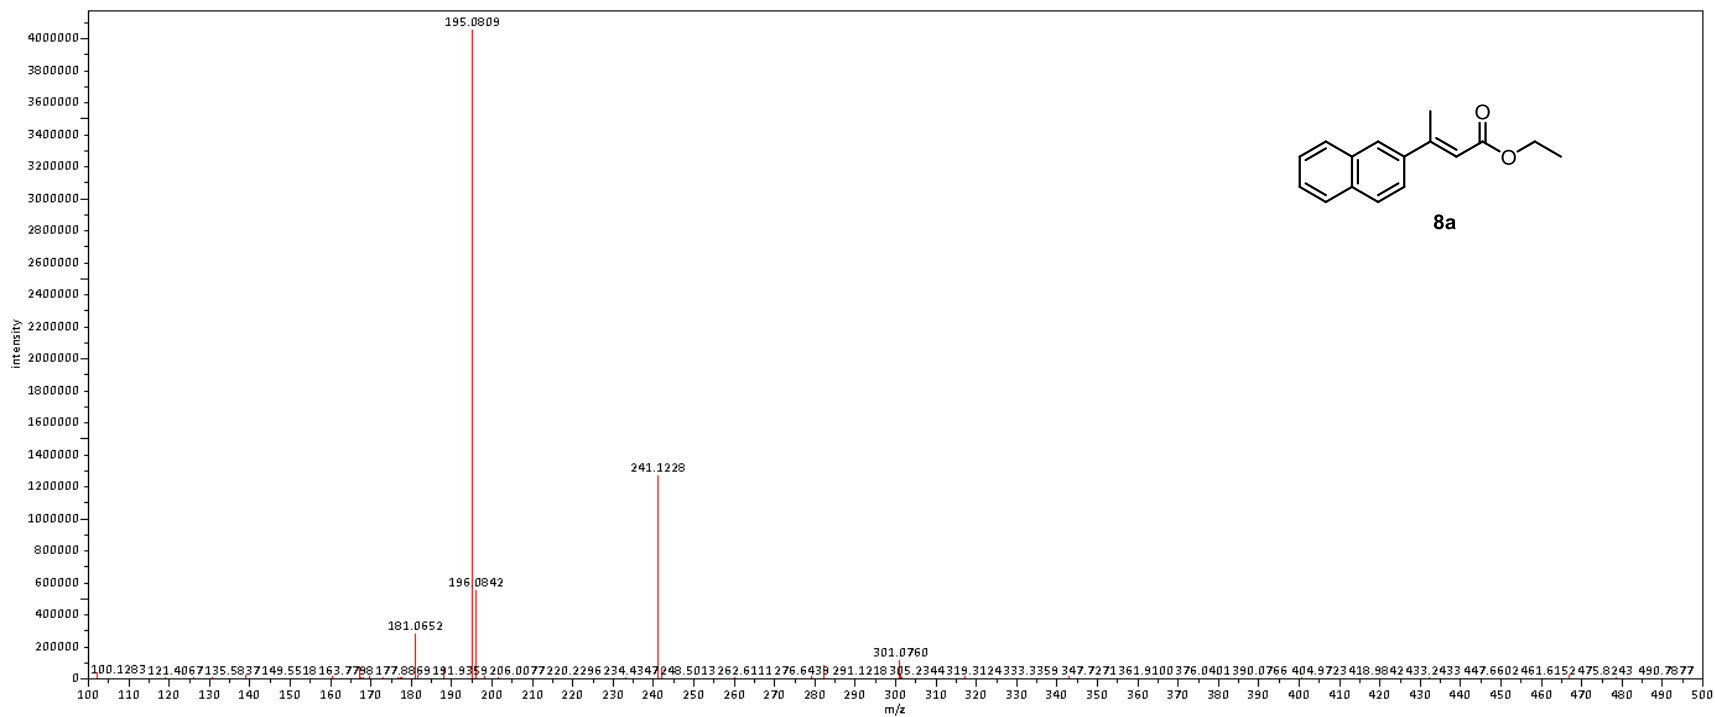



**tert-Butyl (*E*)-3-phenylbut-2-enoate (8b)**

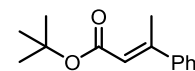

**8b**

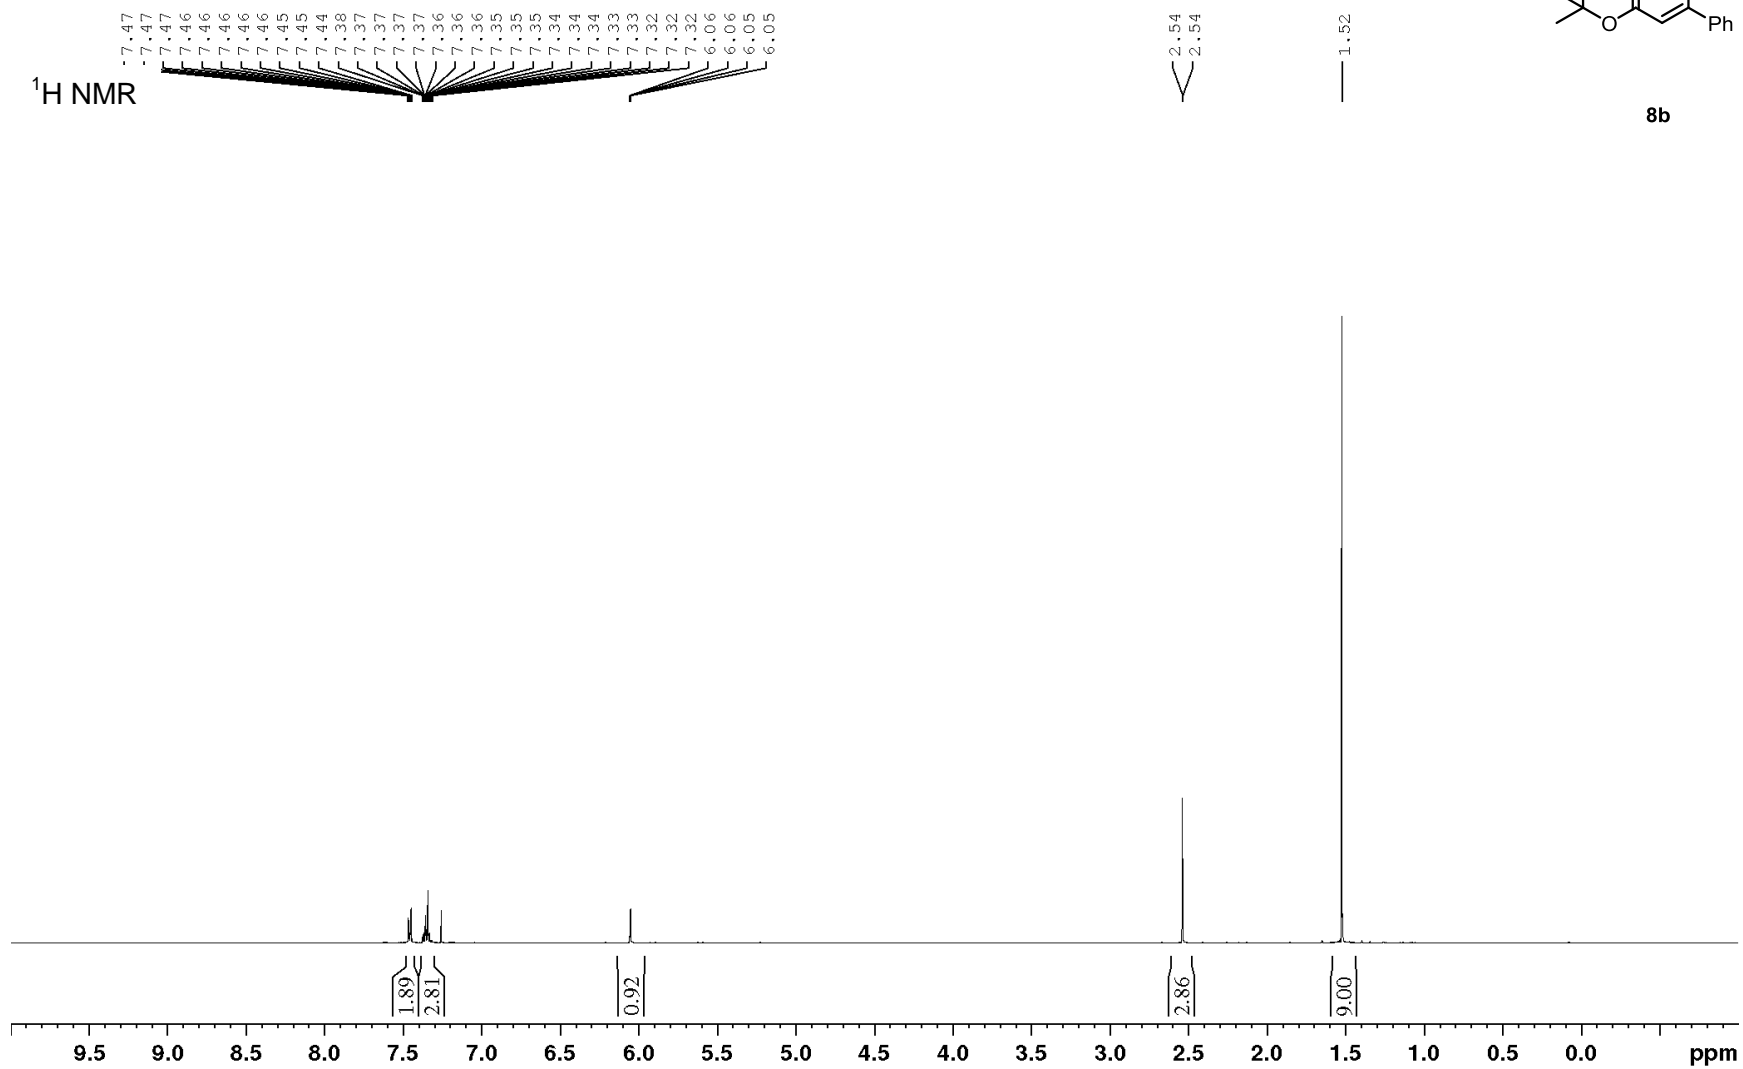

<sup>13</sup>C NMR

166.6

154.1

142.7

128.9

128.6

126.4

119.3

80.1

28.5

17.9

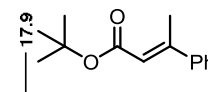

8b

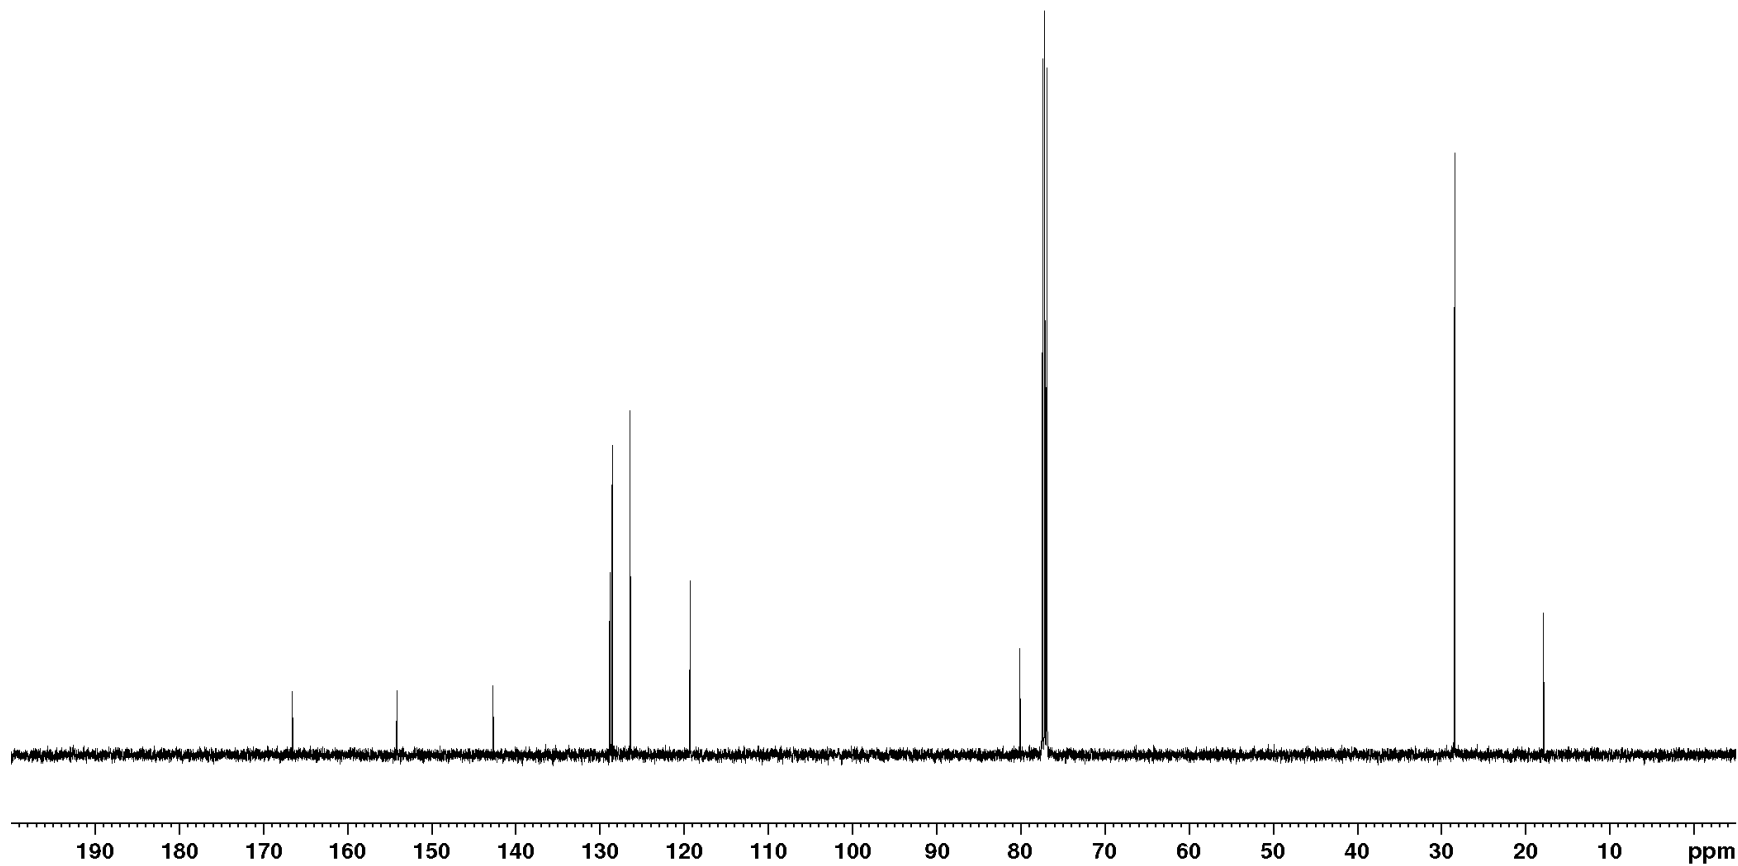

<sup>13</sup>C DEPT NMR

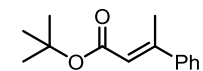

**8b**

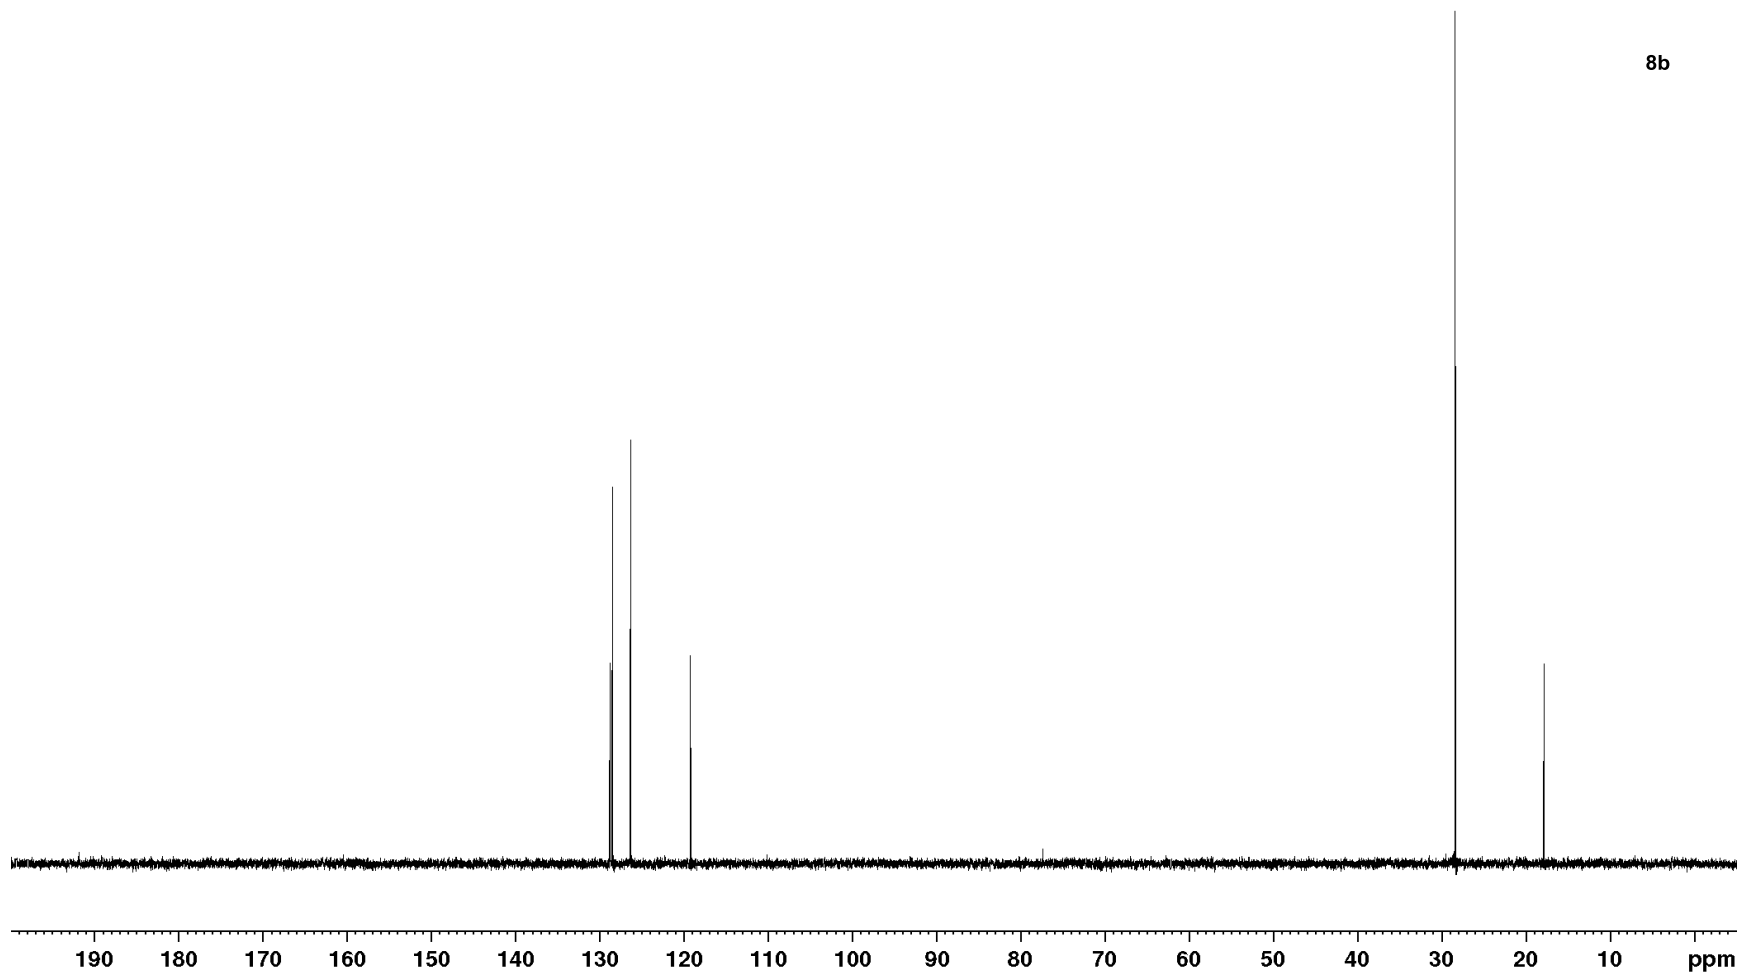

$^1\text{H}$ - $^1\text{H}$  COSY

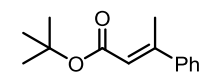

8b

ppm

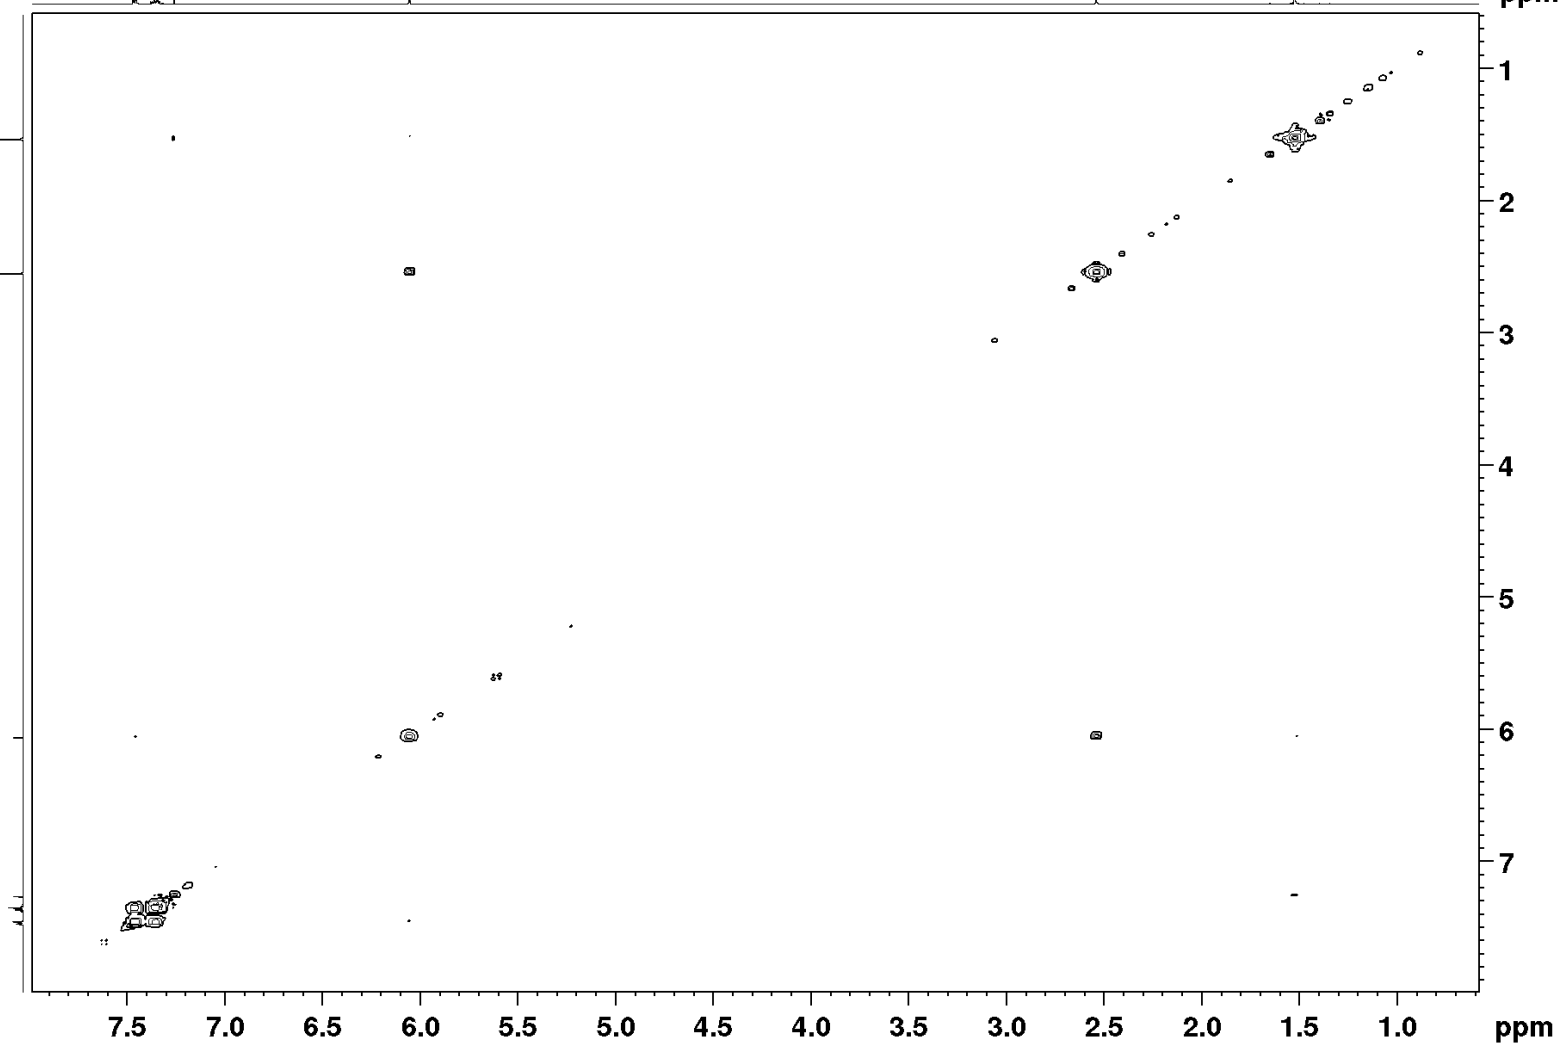

S352

$^1\text{H}$ - $^{13}\text{C}$  HMQC



8b

ppm

0

20

40

60

80

100

120

140

160

ppm

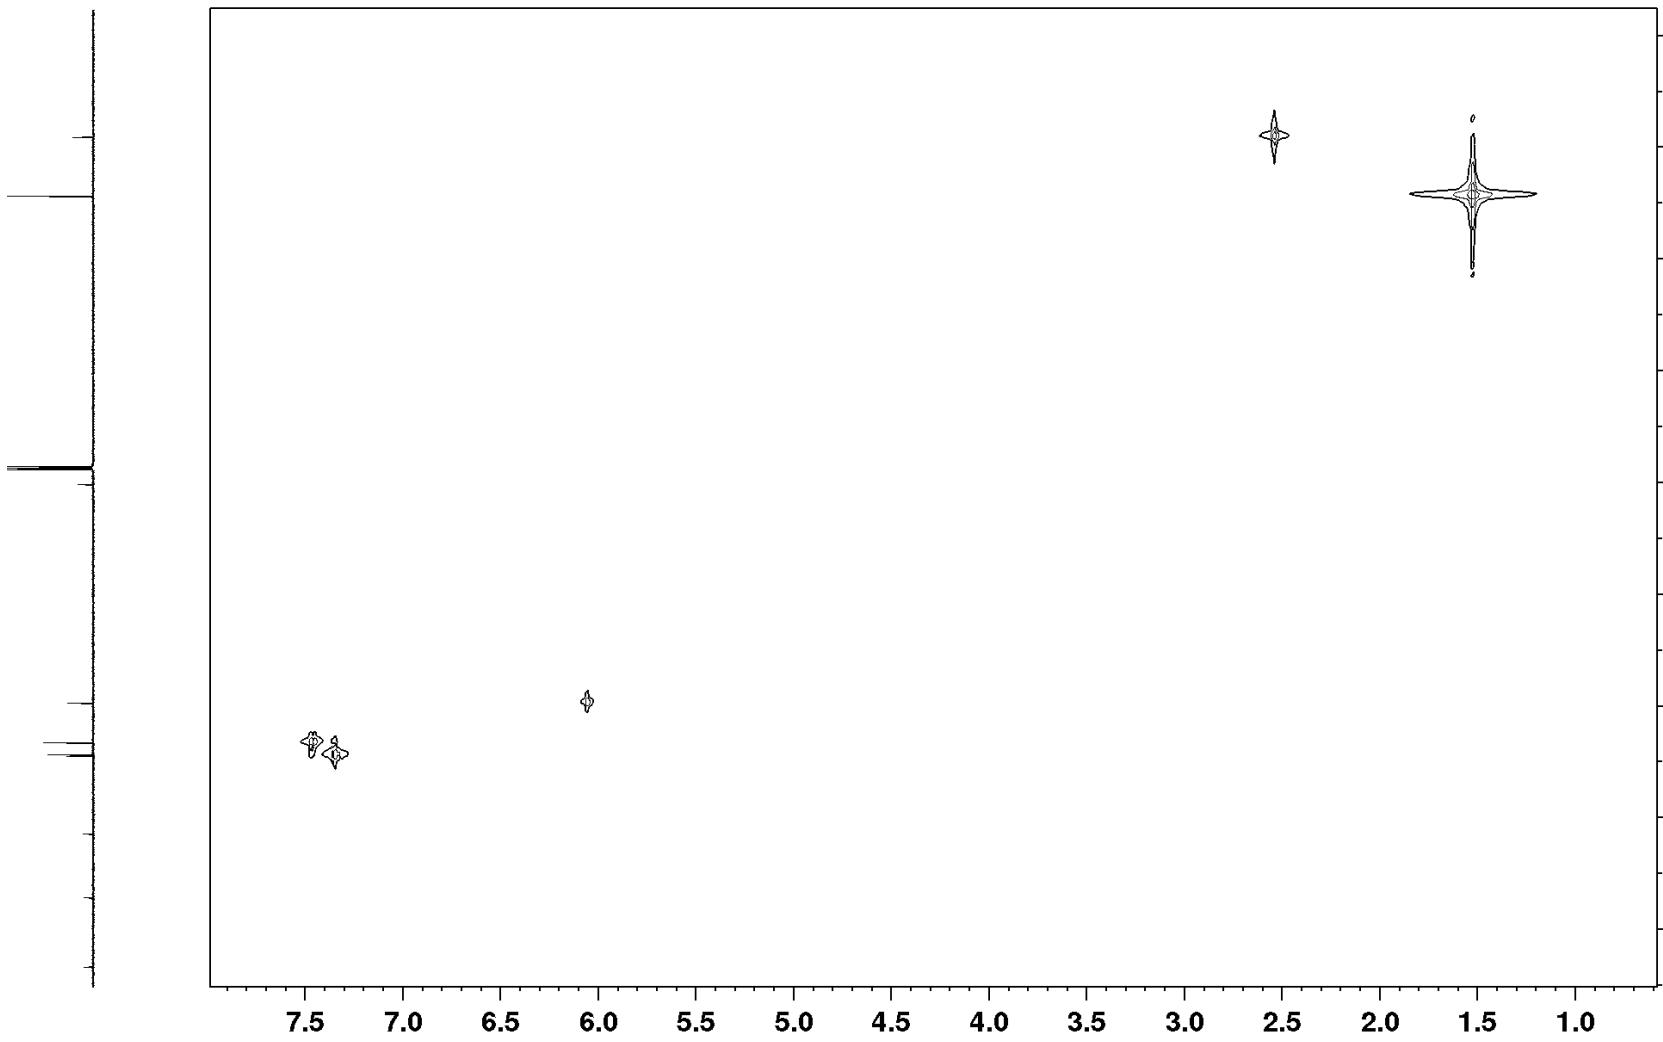

$^1\text{H}$ - $^{13}\text{C}$  HMBC



8b

ppm

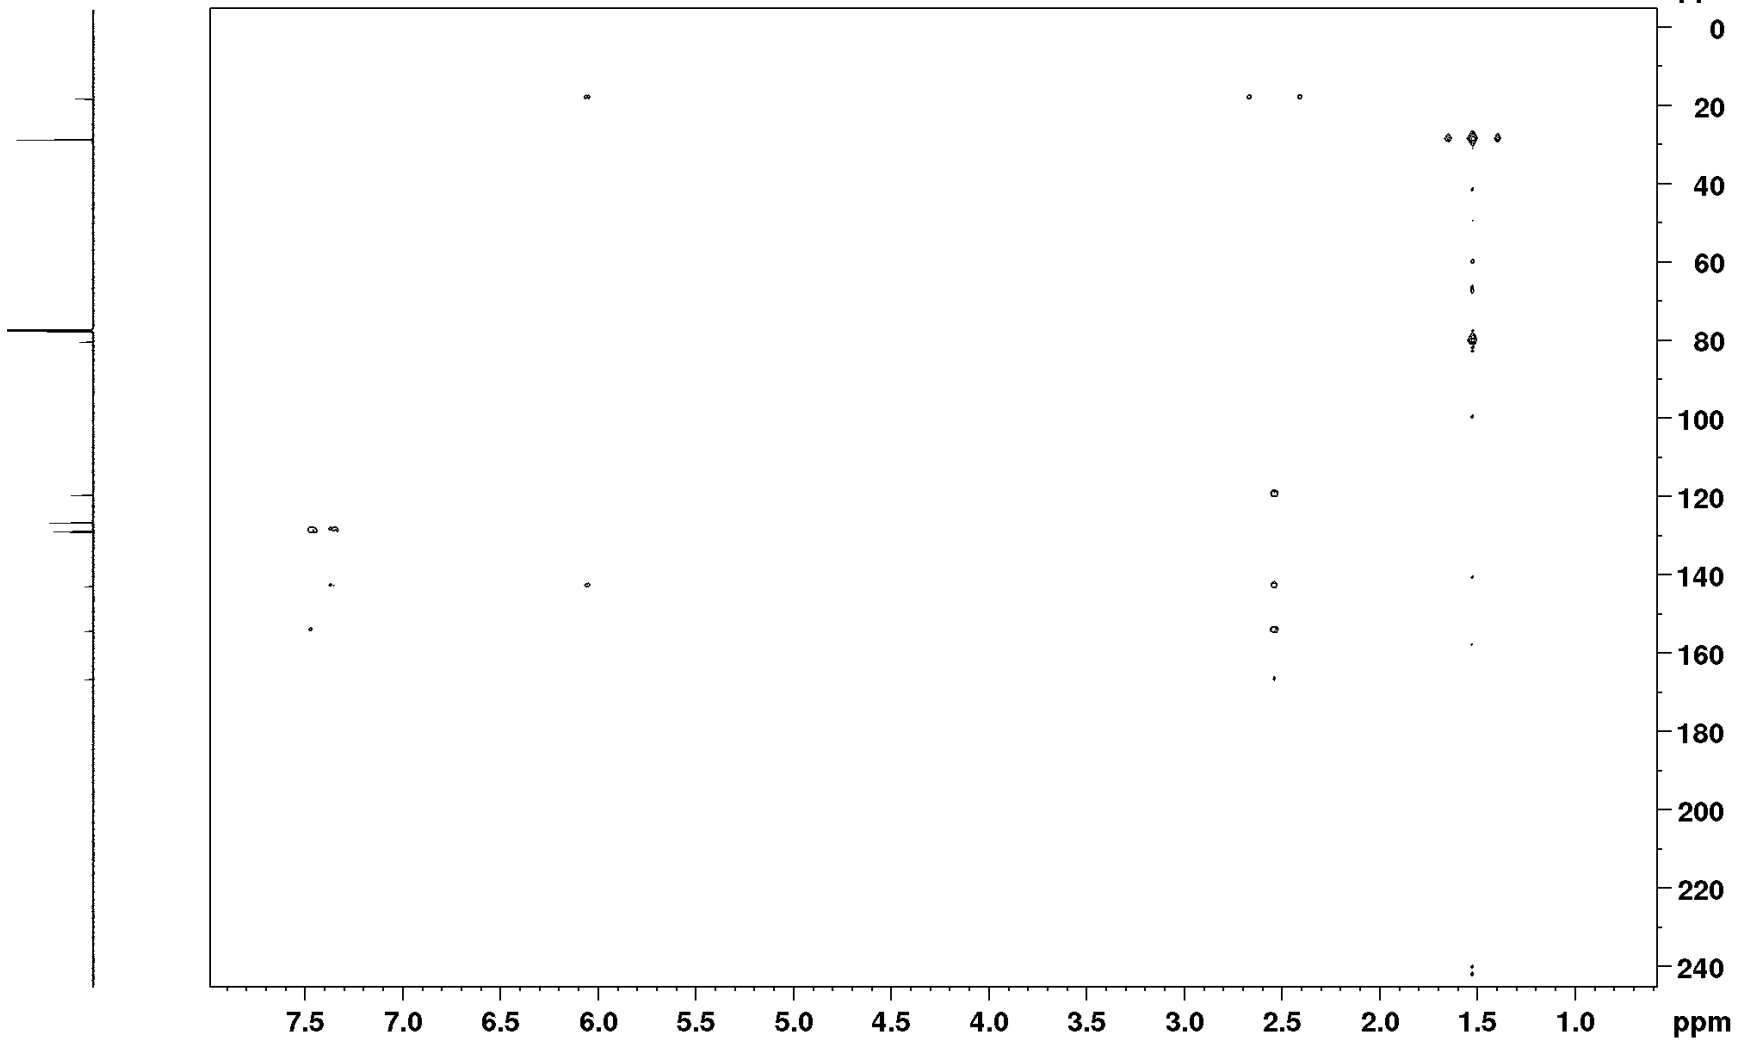

S354

$^1\text{H}$ - $^1\text{H}$  NOESY

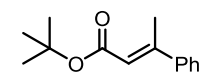

8b  
ppm

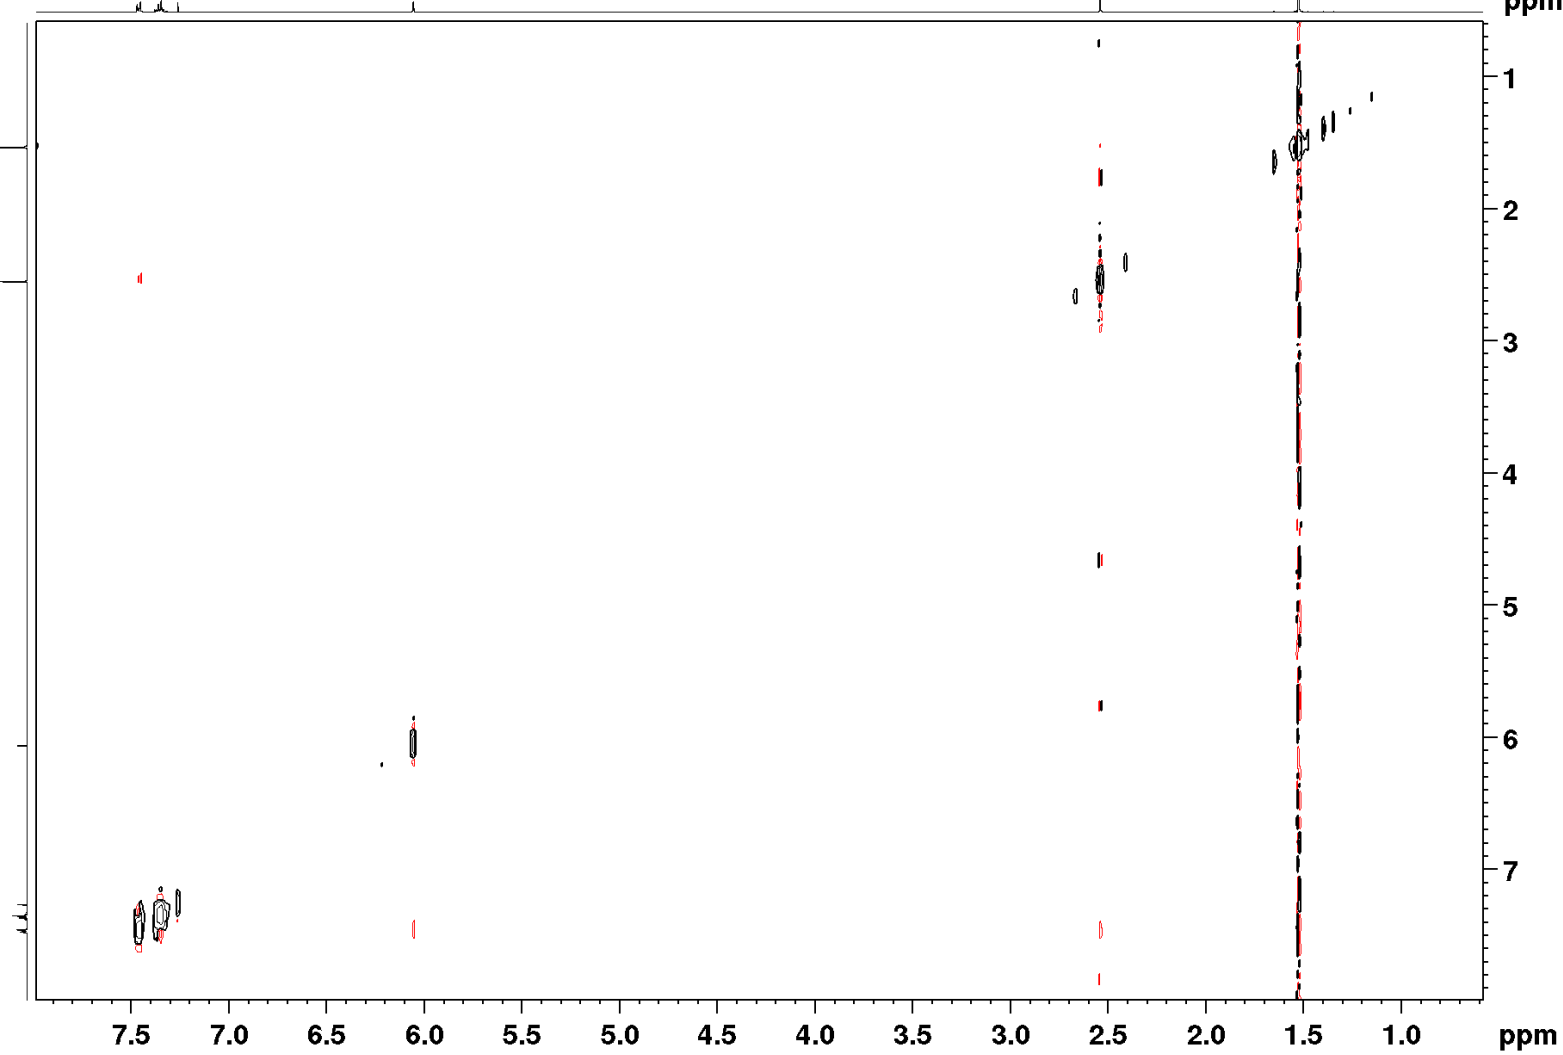

S355

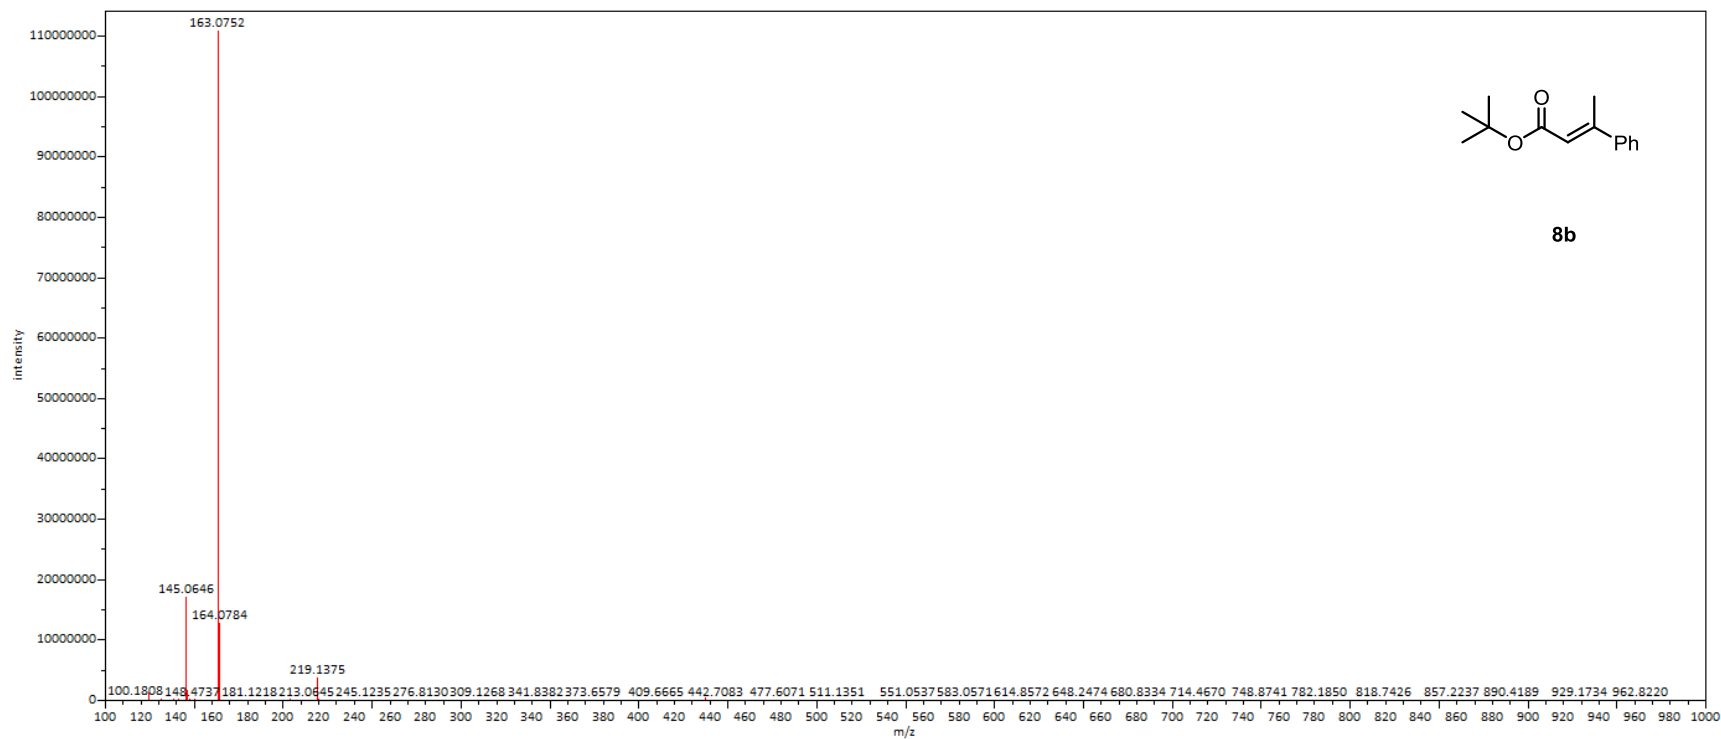



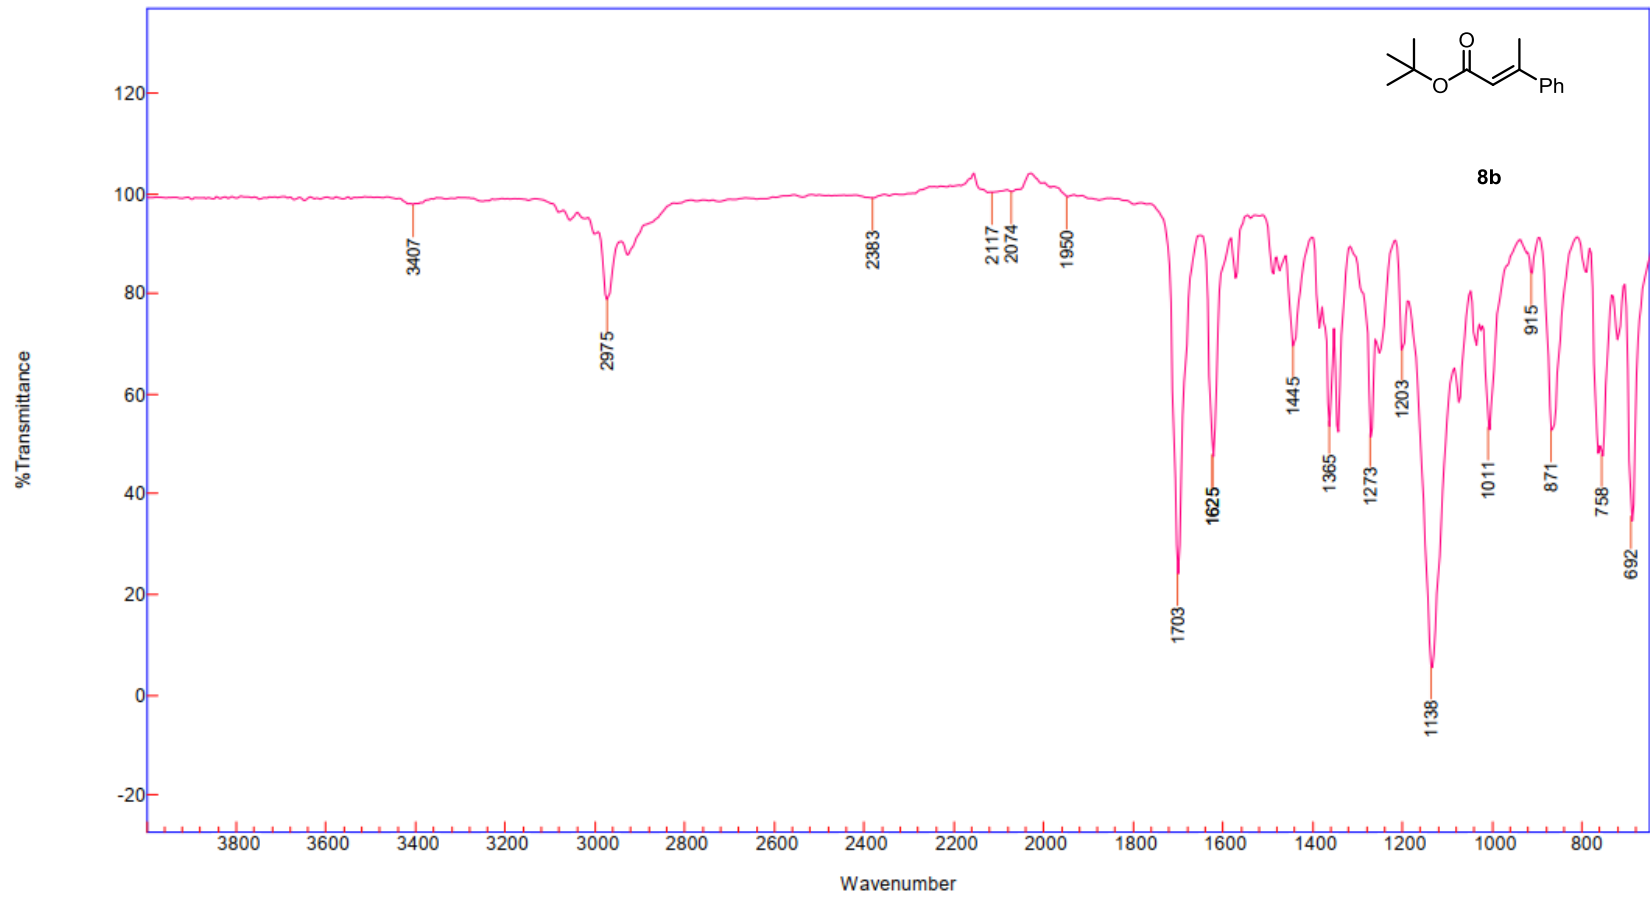

# Ethyl 3,3-diphenylacrylate (8c)

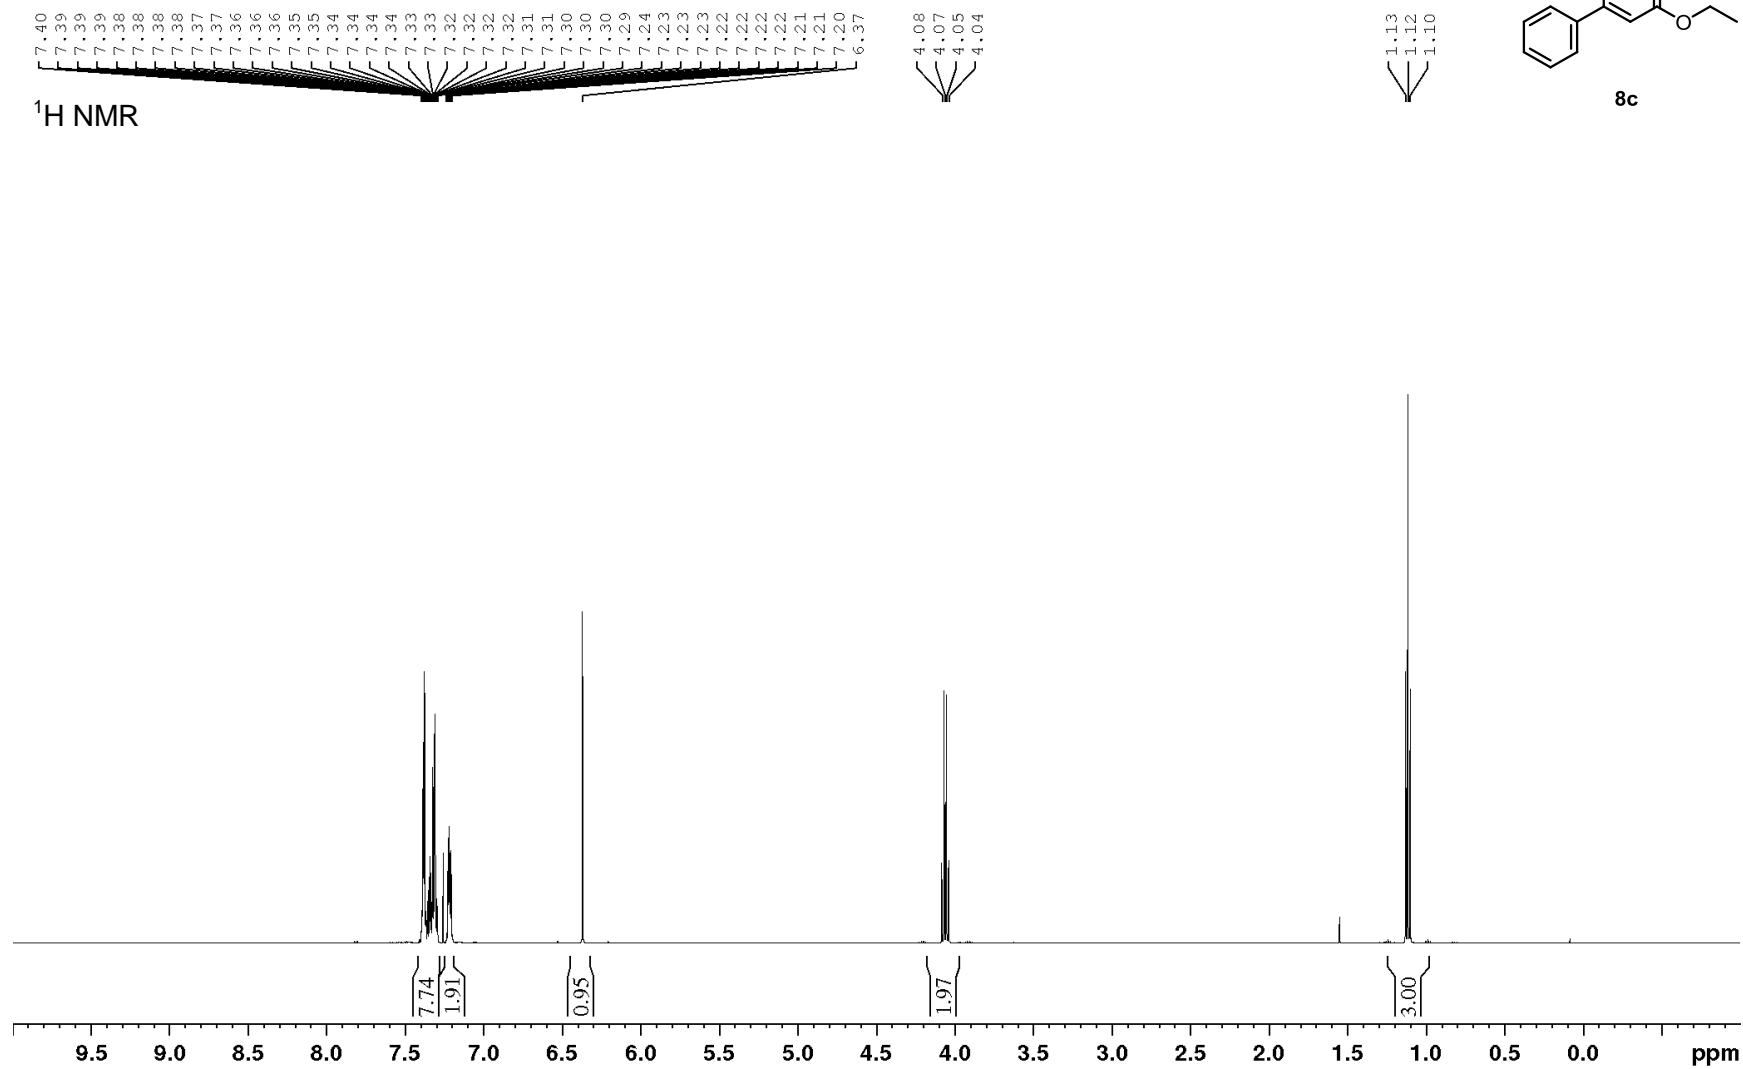

<sup>13</sup>C NMR

166.2

156.6

141.0

139.1

129.5

129.3

128.5

128.5

128.4

128.4

128.2

128.0

117.7

60.2

14.1

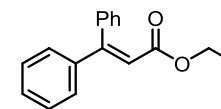

8c

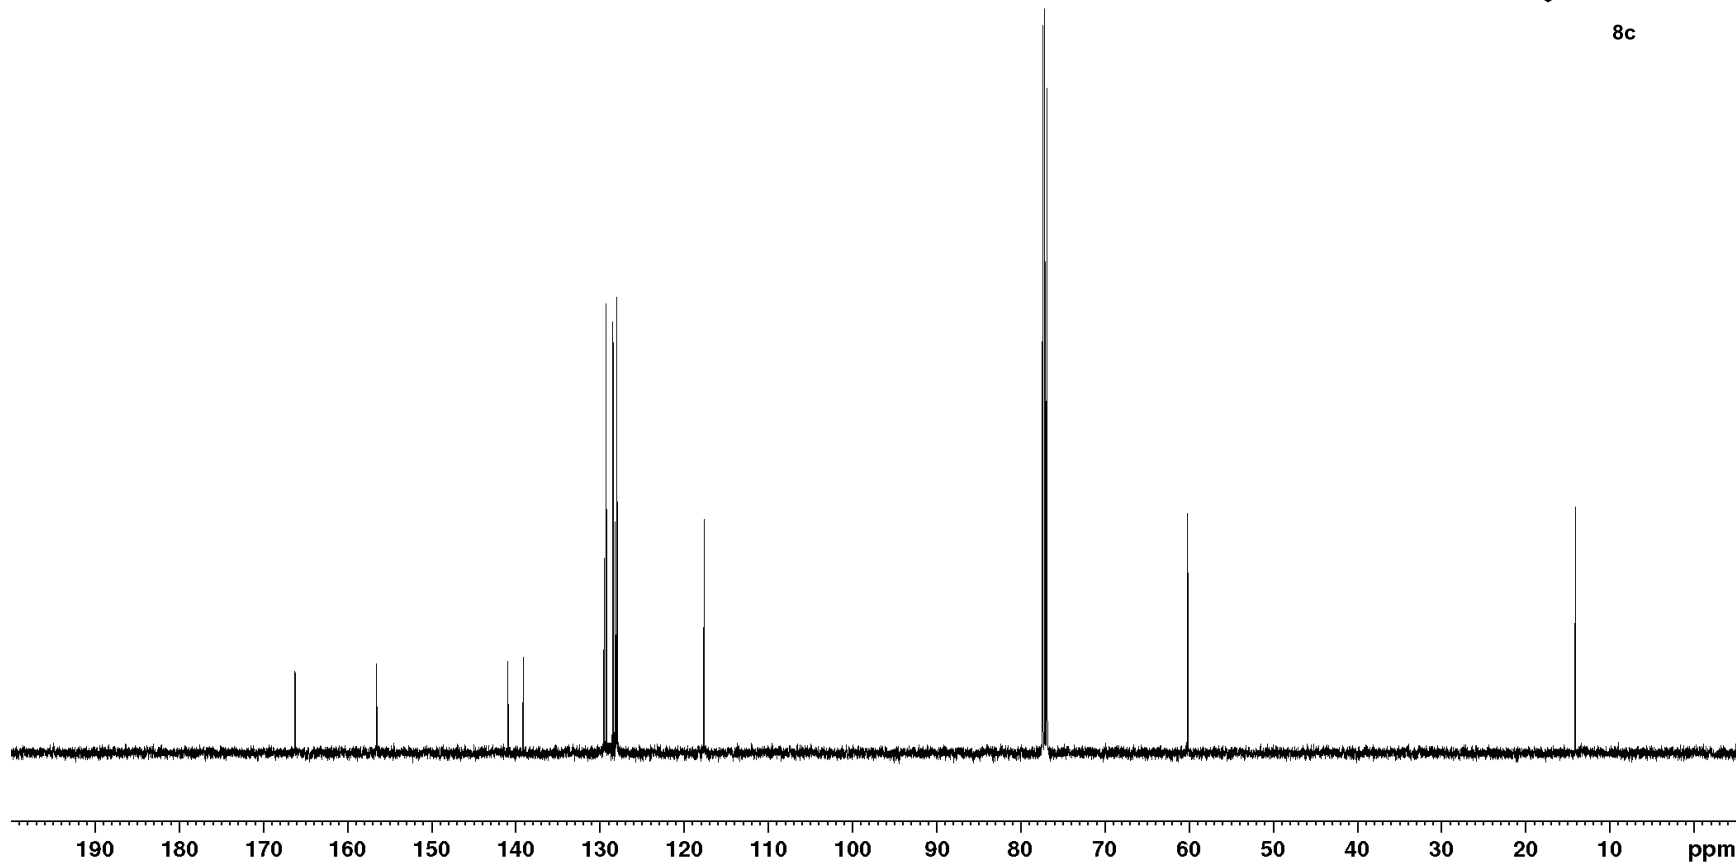

<sup>13</sup>C DEPT NMR

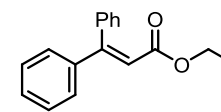

**8c**

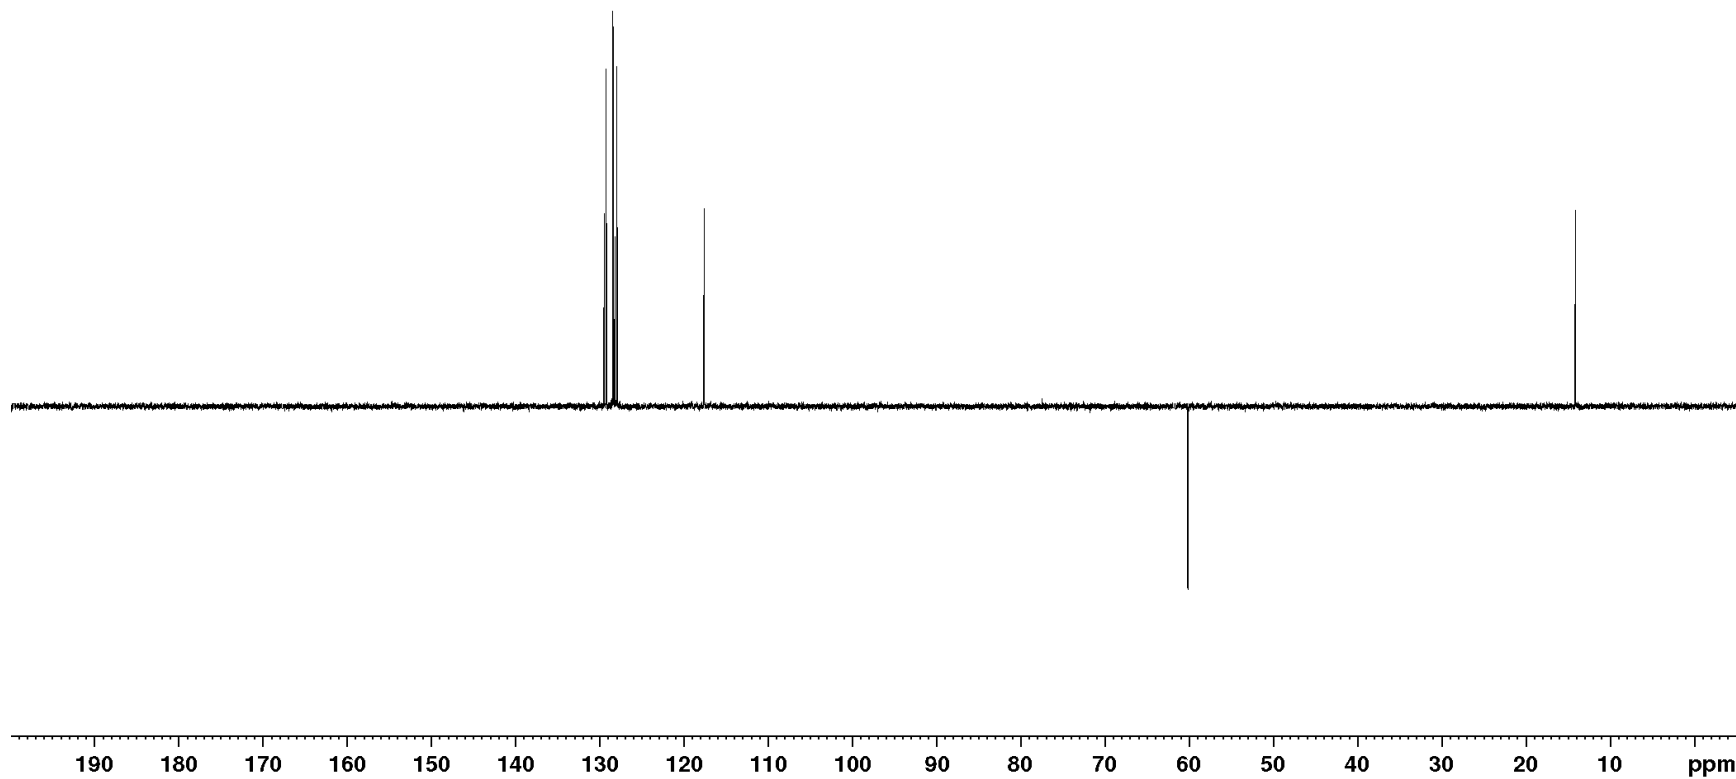

$^1\text{H}$ - $^1\text{H}$  COSY

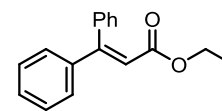

8c

ppm

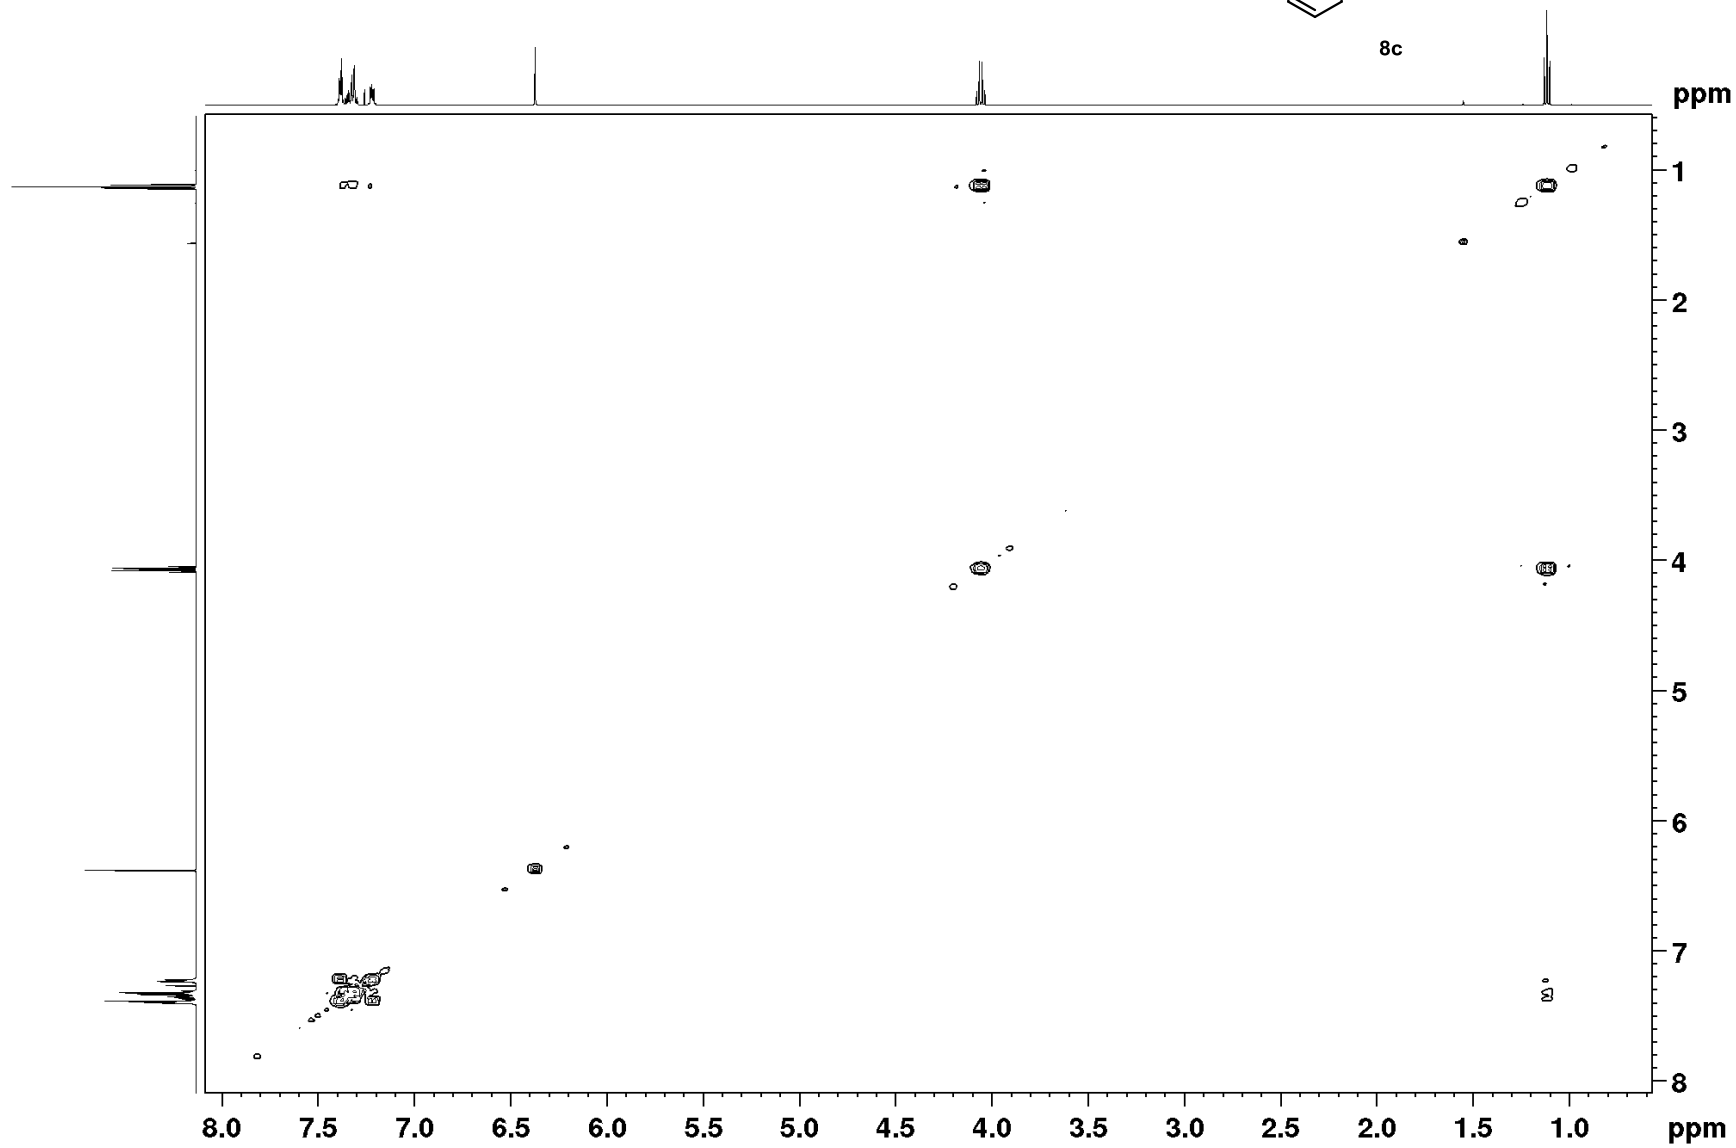

S361

$^1\text{H}$ - $^{13}\text{C}$  HMQC

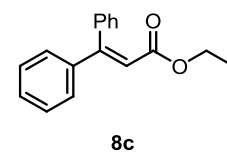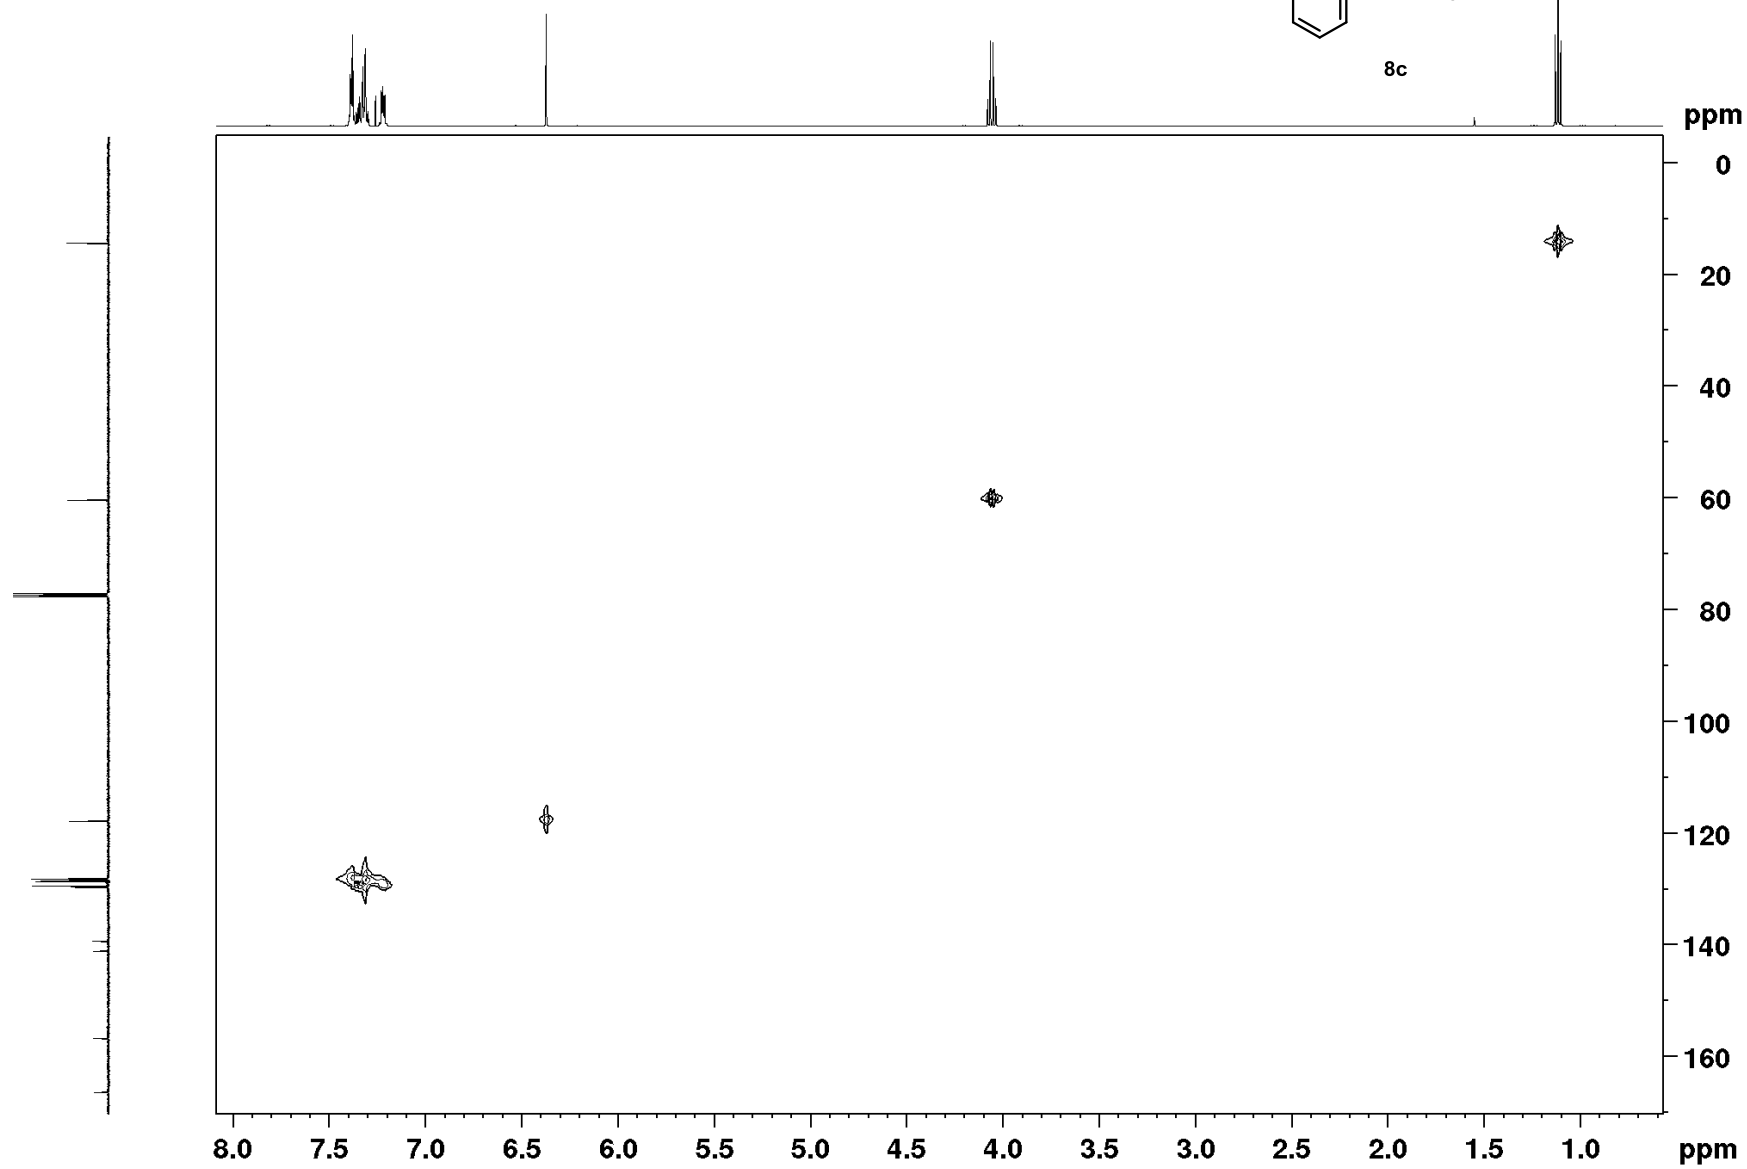

$^1\text{H}$ - $^{13}\text{C}$  HMBC

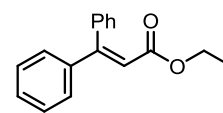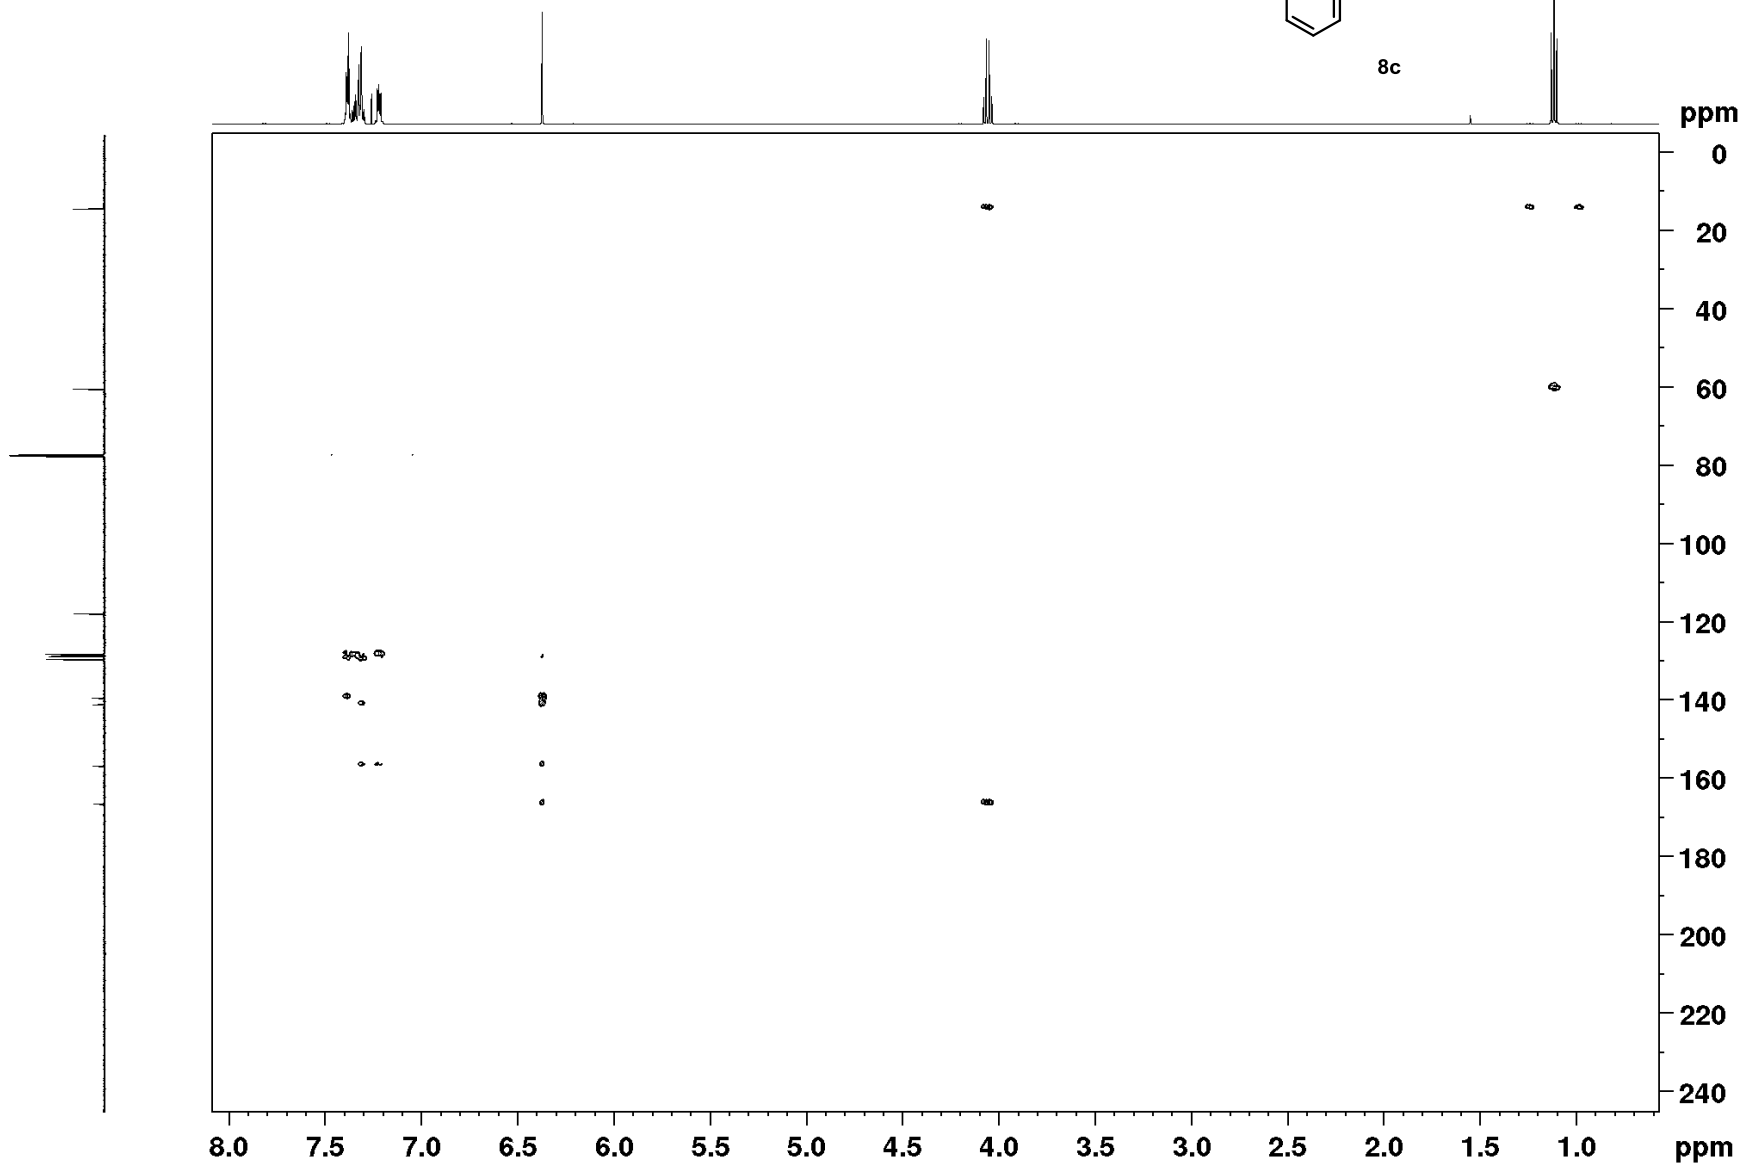

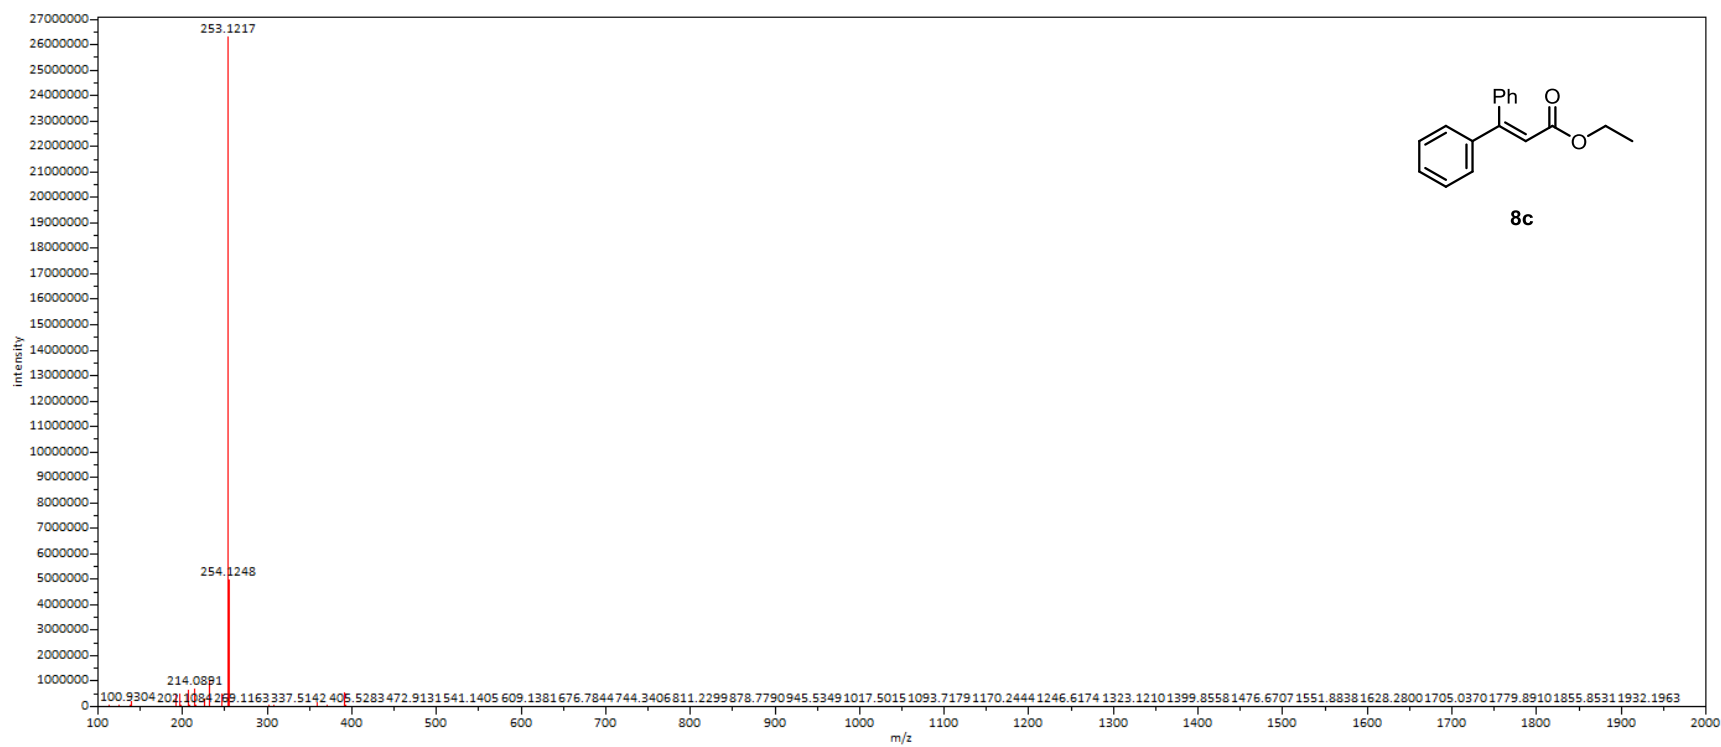



**Ethyl (*E*)-3-(4-methoxyphenyl)but-2-enoate (8d)**

<sup>1</sup>H NMR

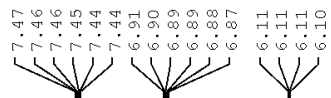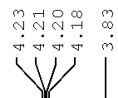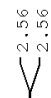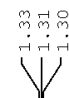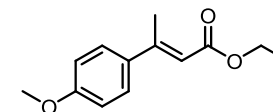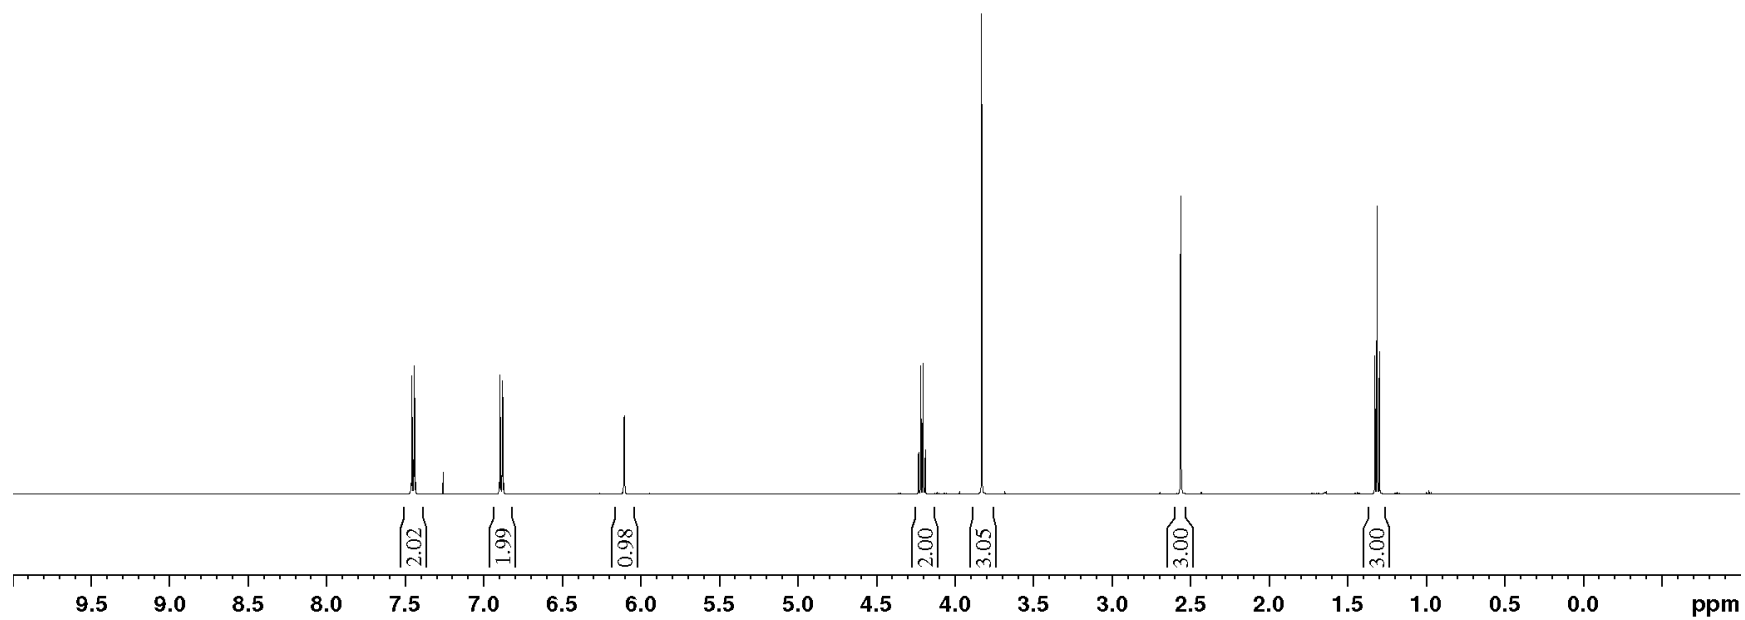

<sup>13</sup>C NMR

167.2

160.6

155.0

134.5

127.8

115.5

113.9

59.8

55.4

17.8

14.5

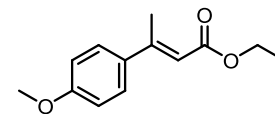

8d

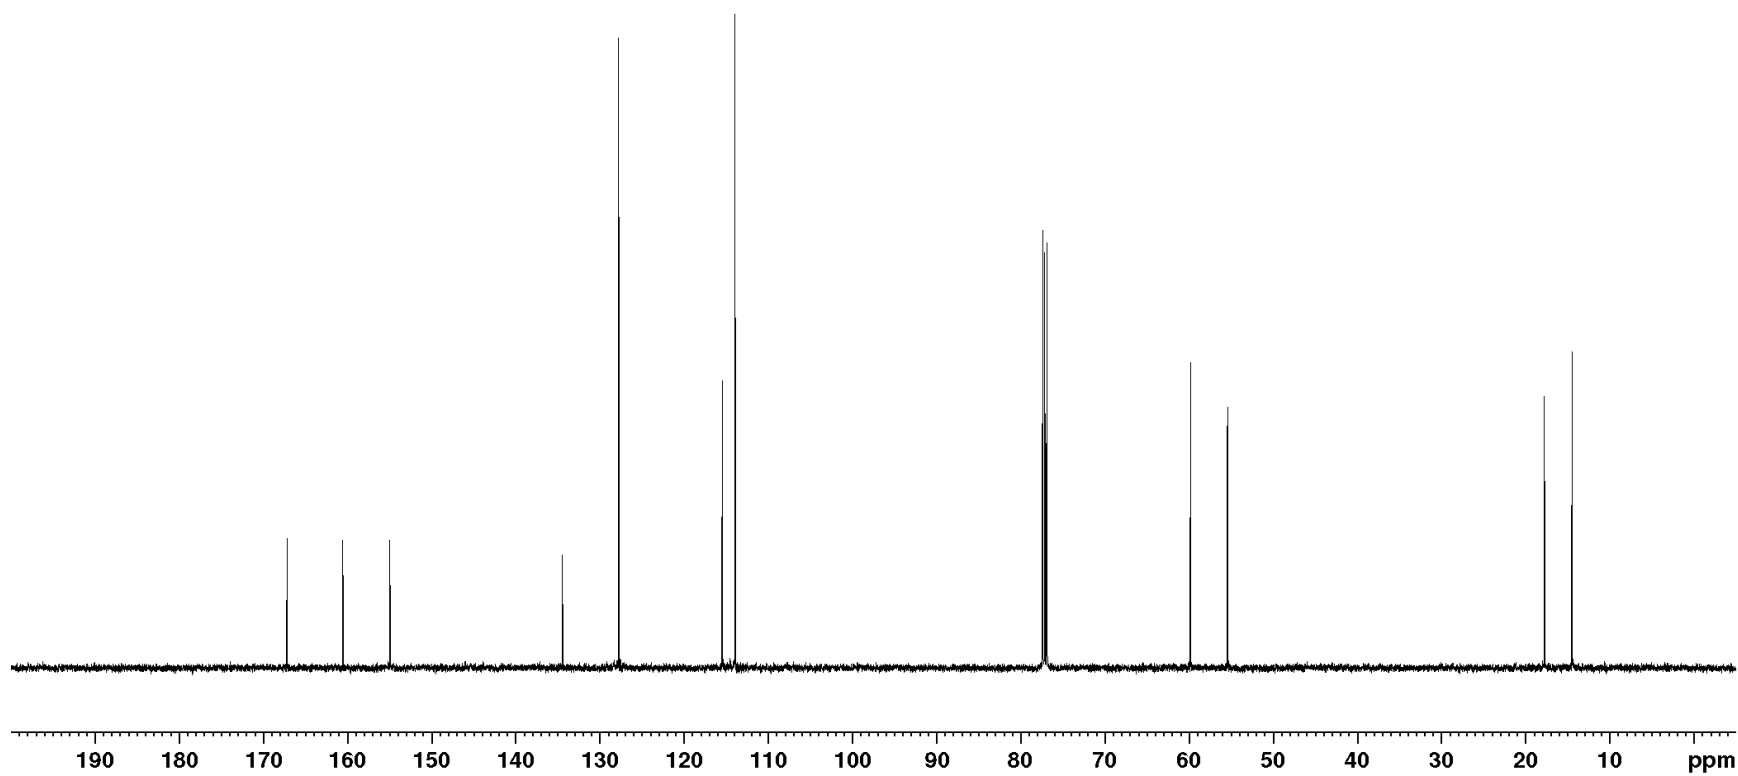

<sup>13</sup>C DEPT NMR

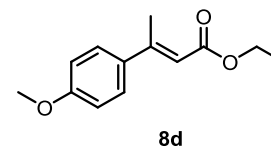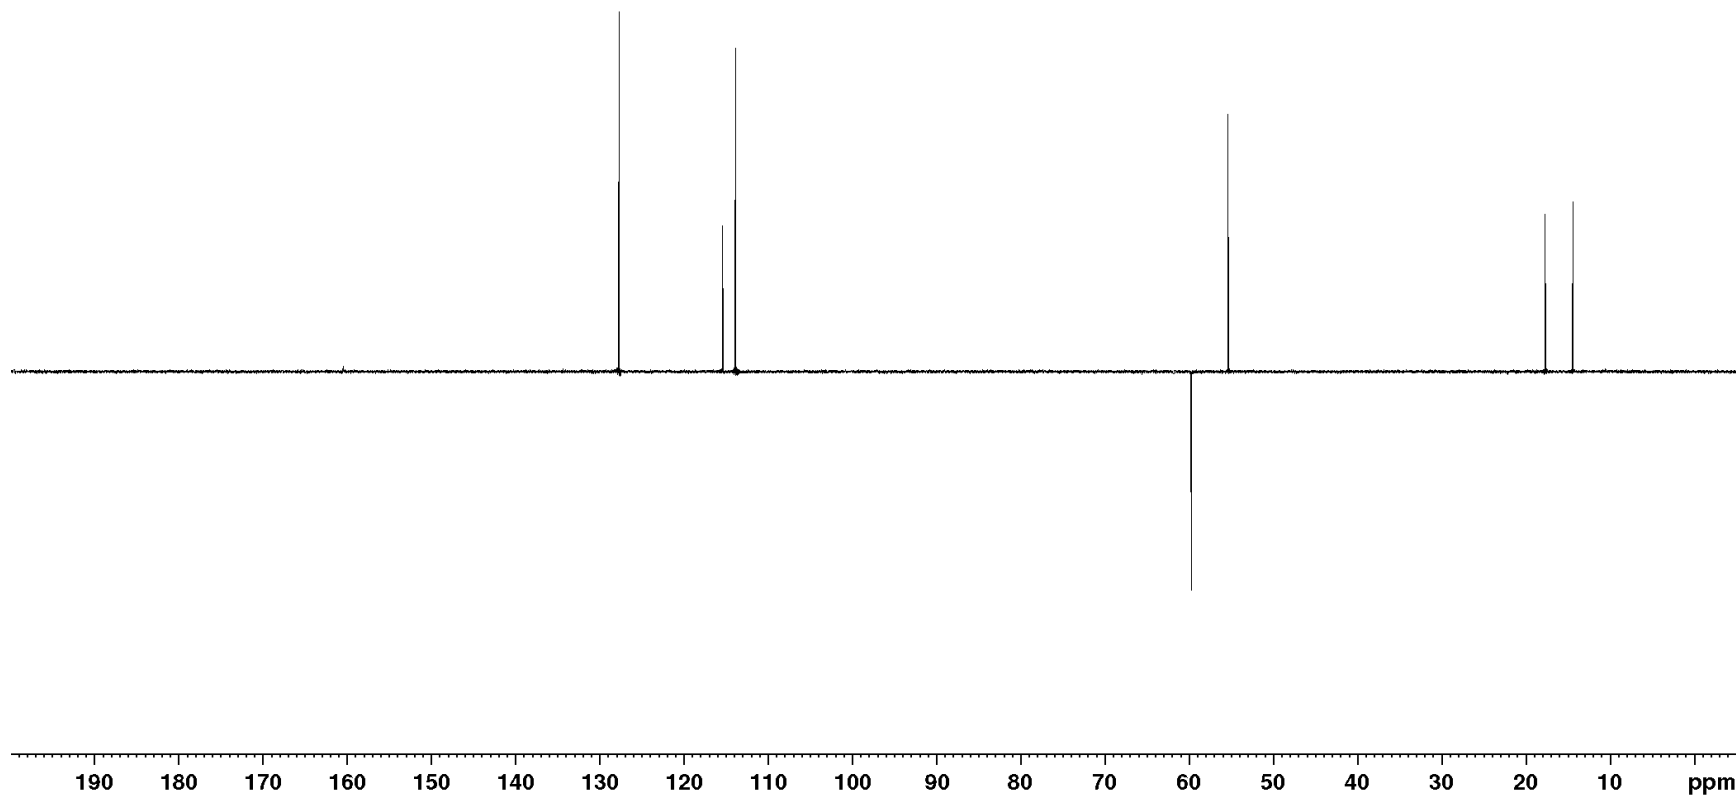

$^1\text{H}$ - $^1\text{H}$  COSY

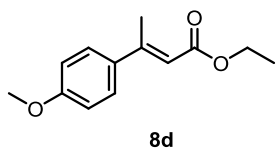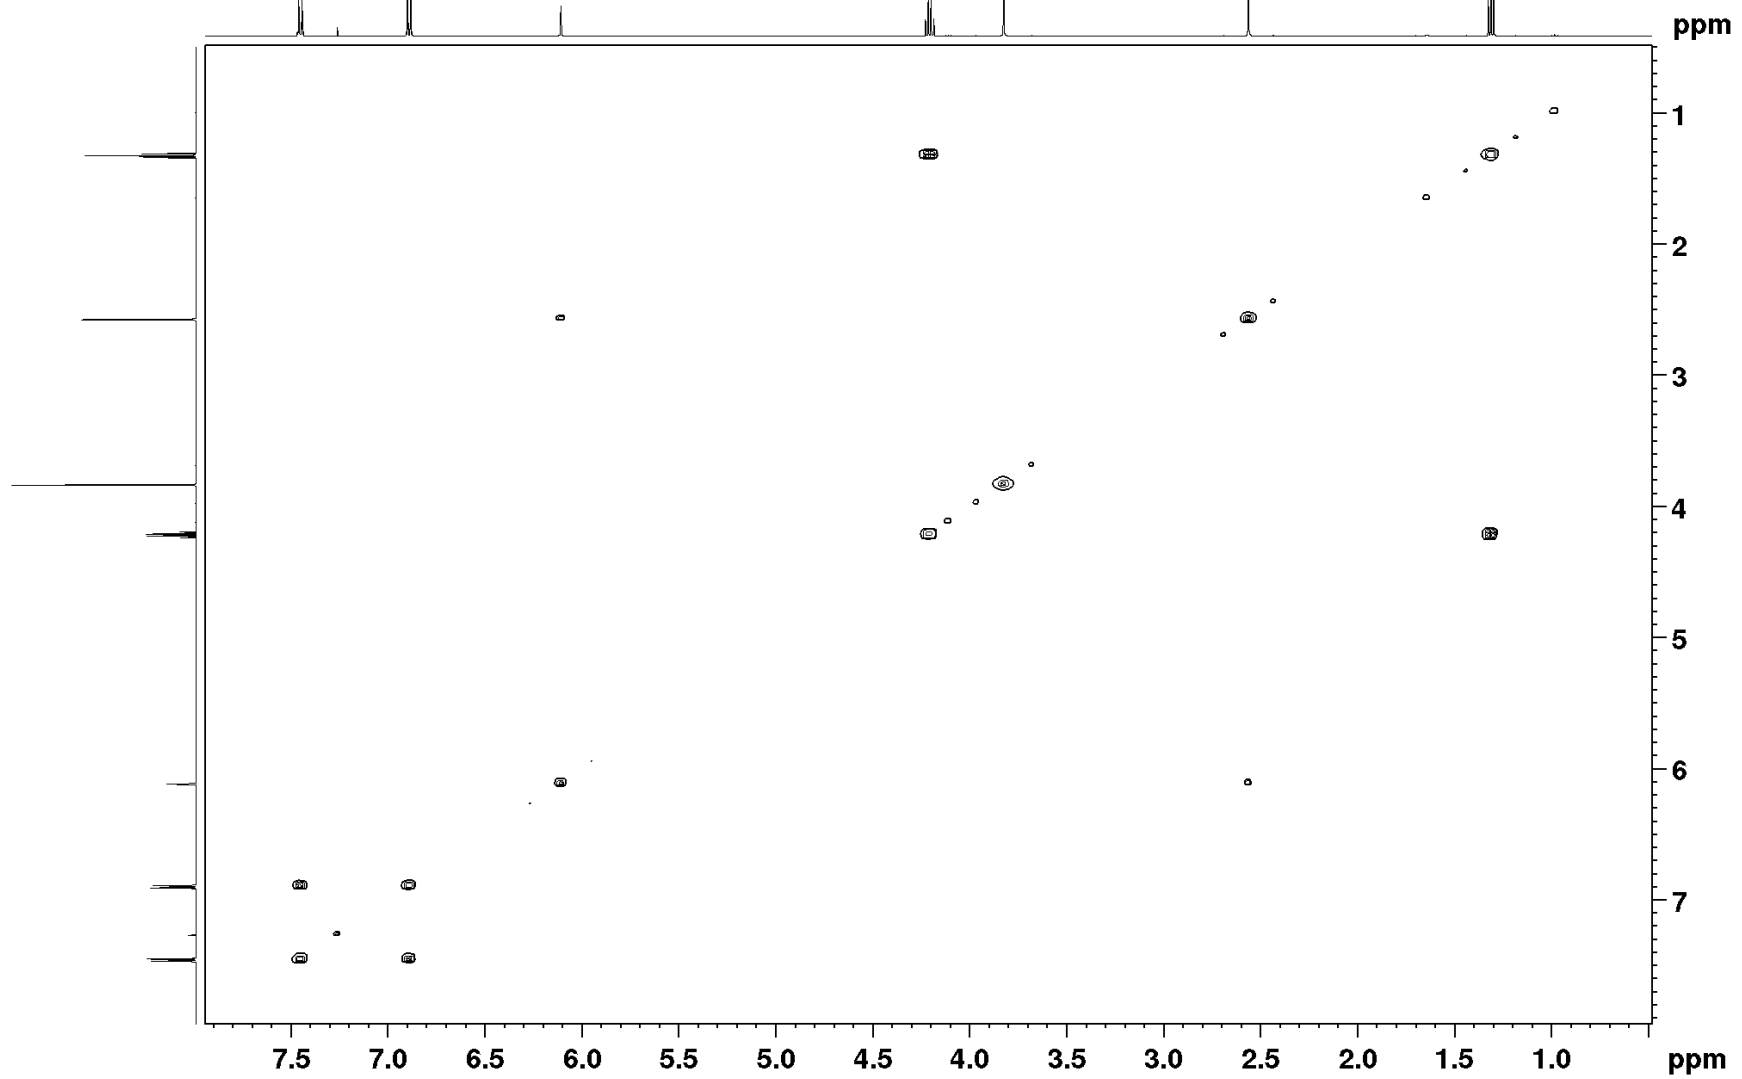

$^1\text{H}$ - $^{13}\text{C}$  HMQC

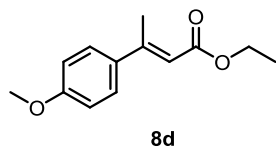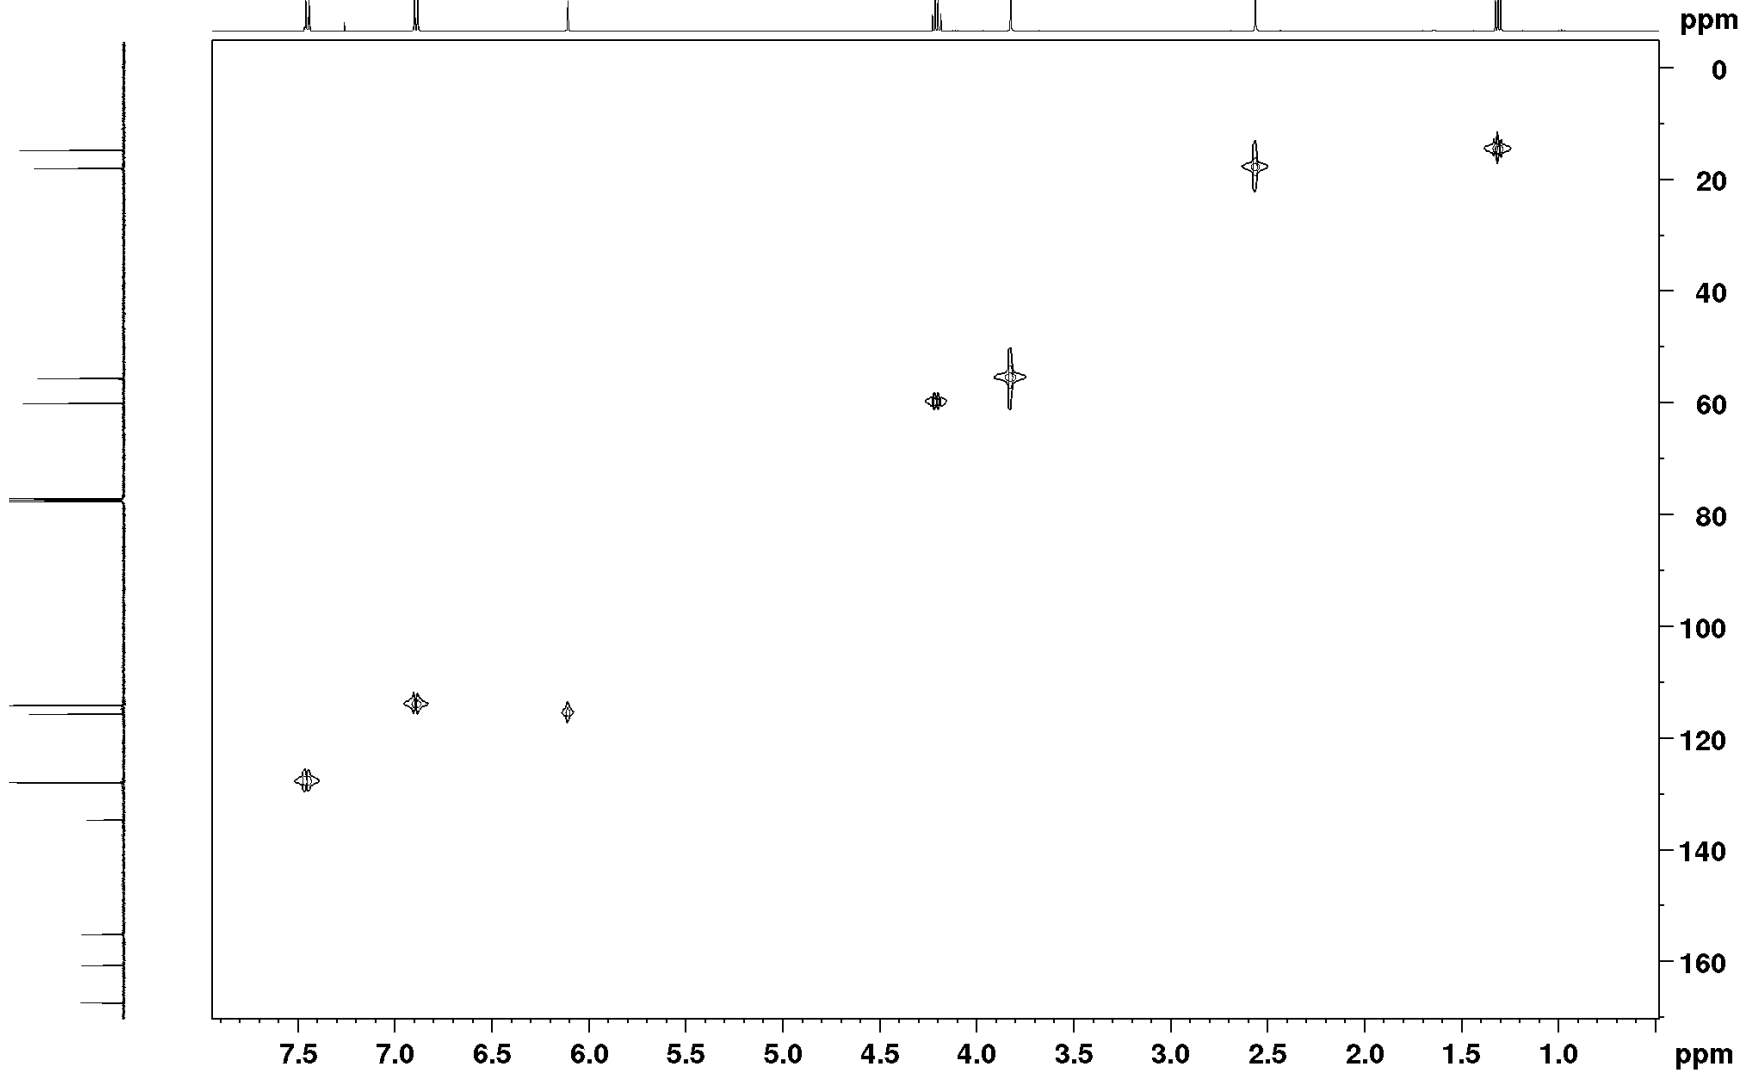

$^1\text{H}$ - $^{13}\text{C}$  HMBC

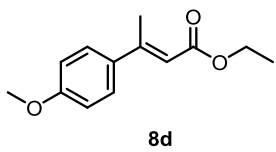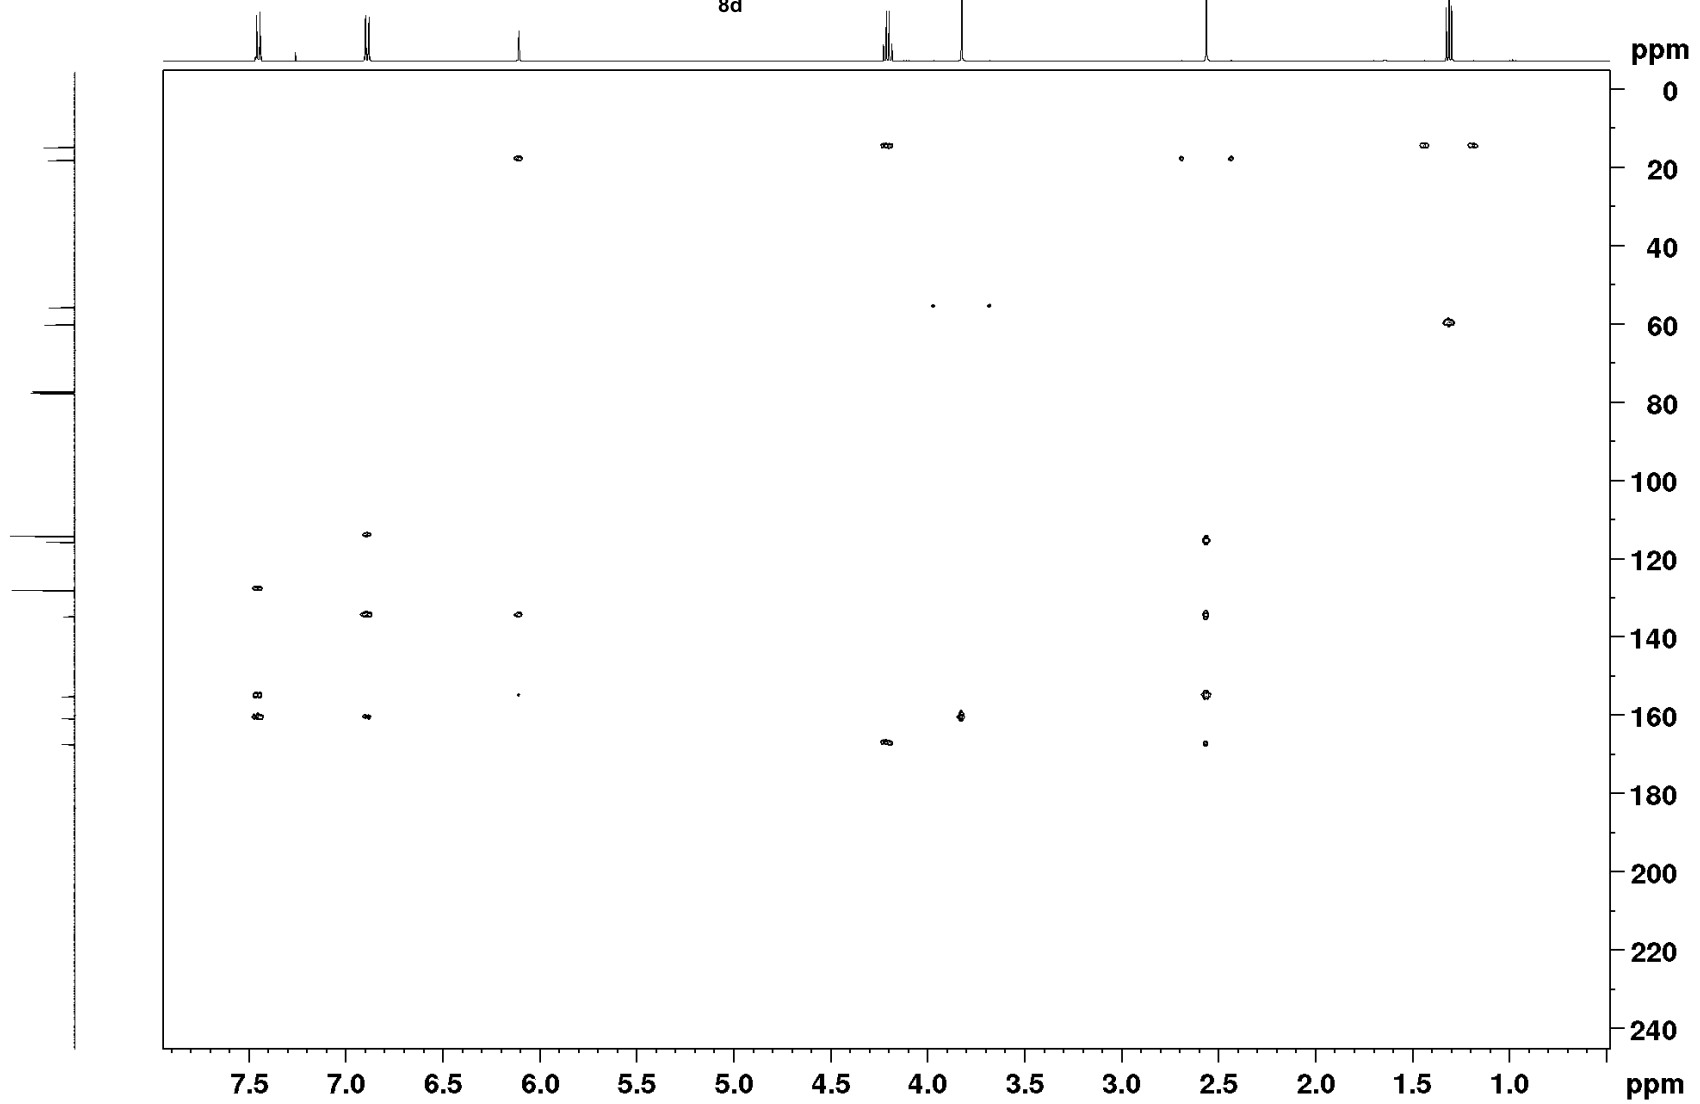

$^1\text{H}$ - $^1\text{H}$  NOESY

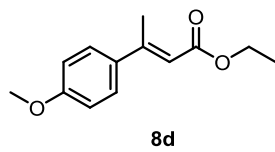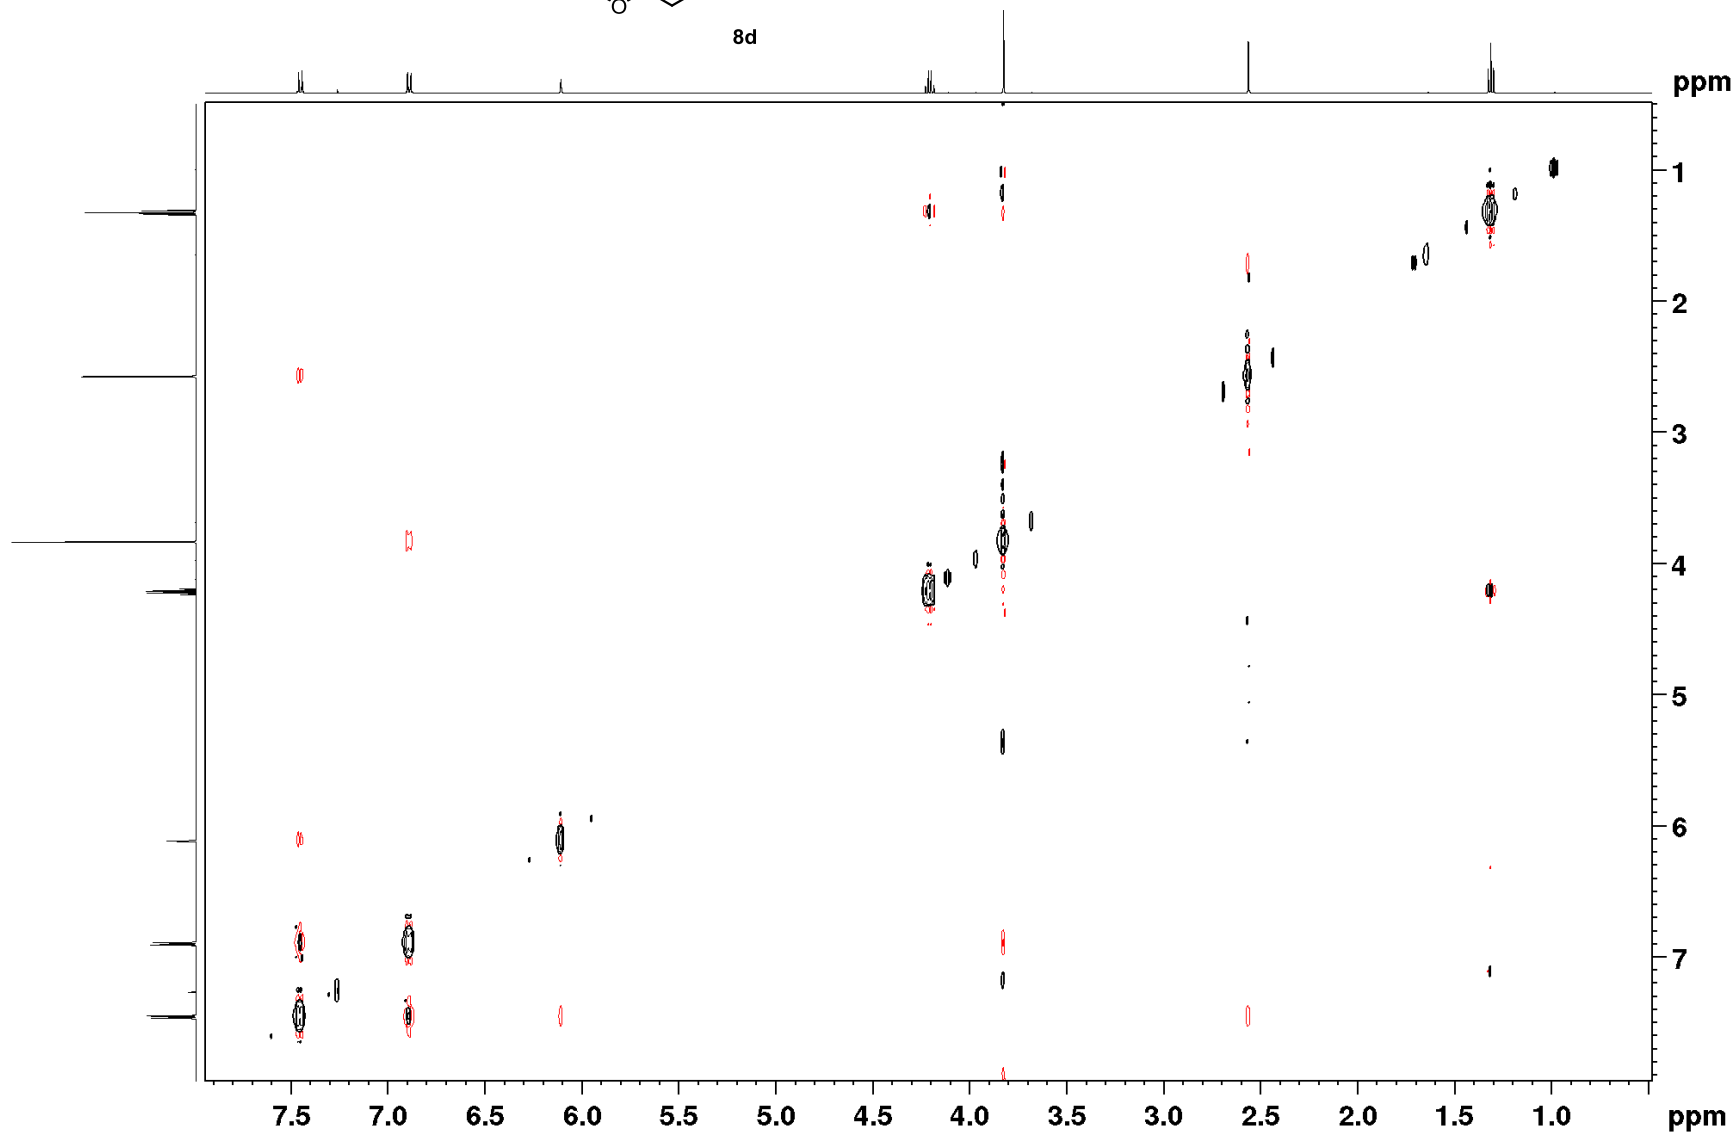

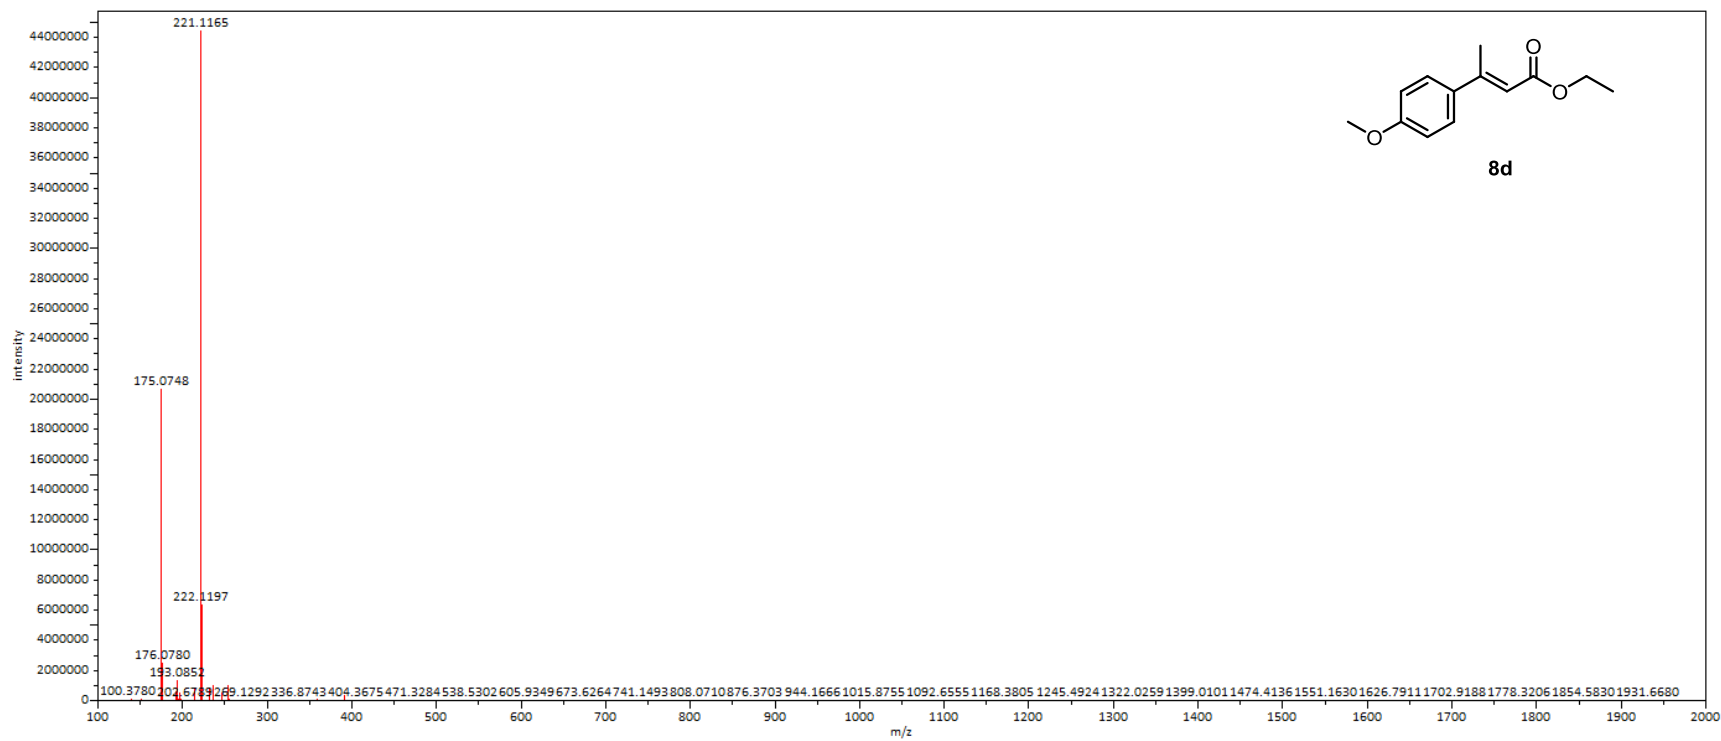



Ethyl (*E*)-3-(4-(trifluoromethyl)phenyl)but-2-enoate (**8e**)

<sup>1</sup>H NMR

7.64  
7.64  
7.62  
7.57  
7.57  
7.55  
7.55

6.15  
6.15  
6.14  
6.14

4.25  
4.24  
4.22  
4.21

2.58  
2.57

1.34  
1.32  
1.31

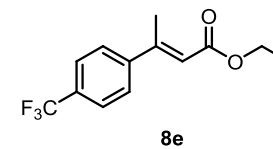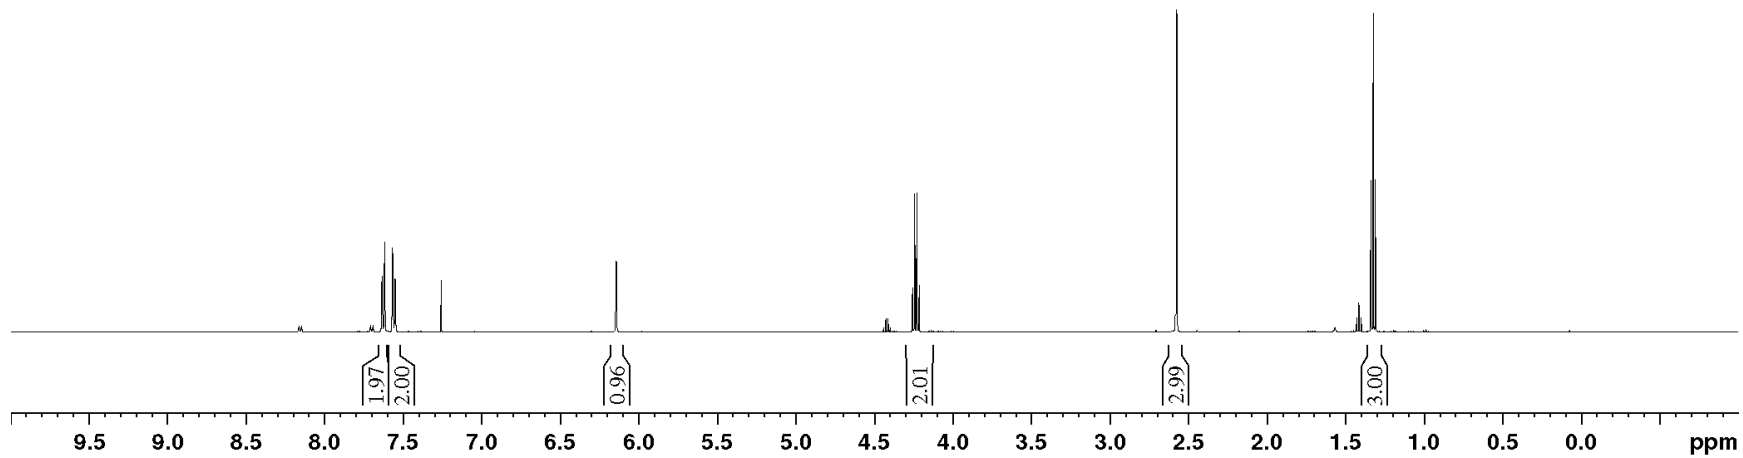

<sup>13</sup>C NMR

166.5  
153.9  
145.9  
131.3  
131.1  
130.8  
130.5  
127.3  
126.8  
125.7  
125.6  
125.6  
125.2  
123.0  
120.9  
119.1

60.2

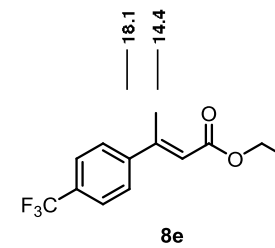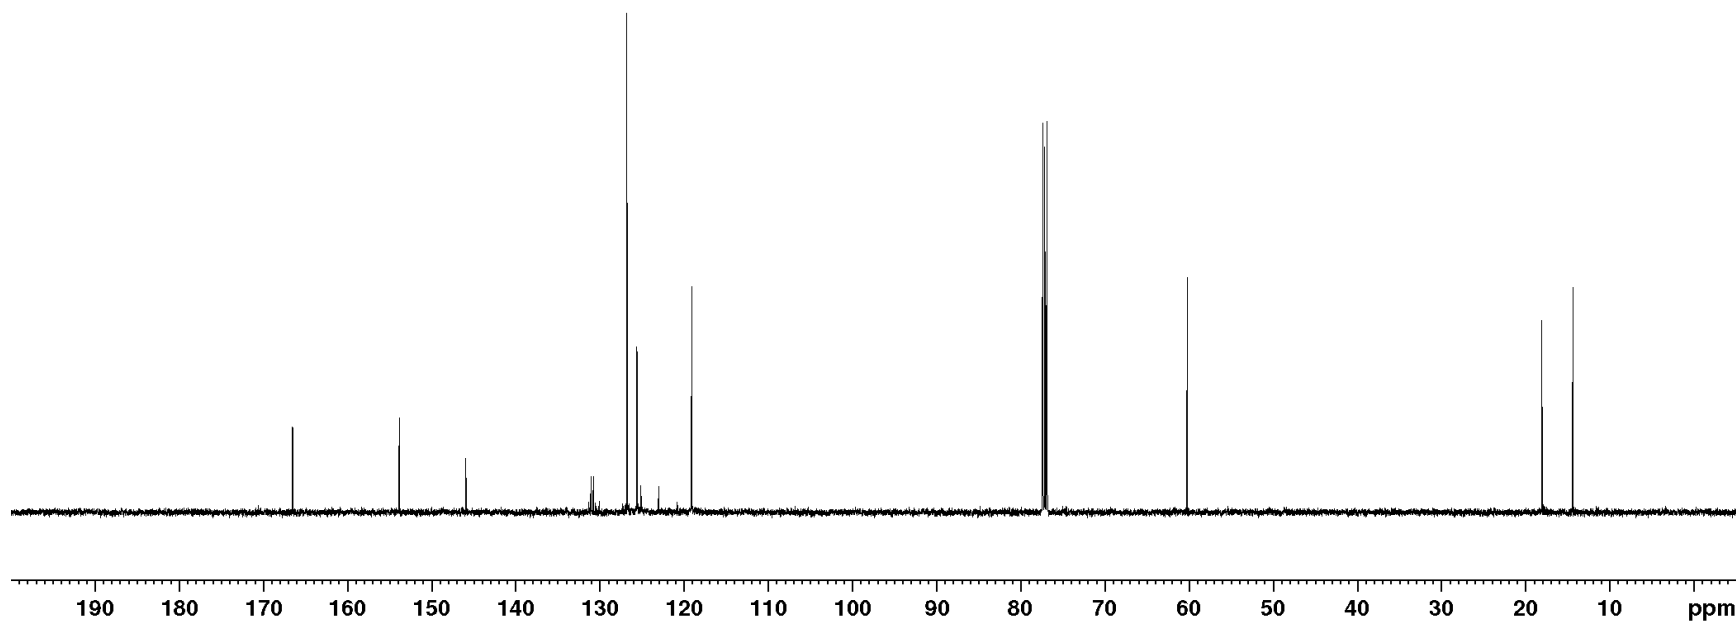

<sup>13</sup>C DEPT NMR

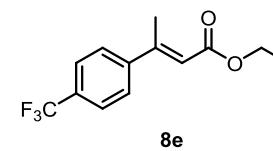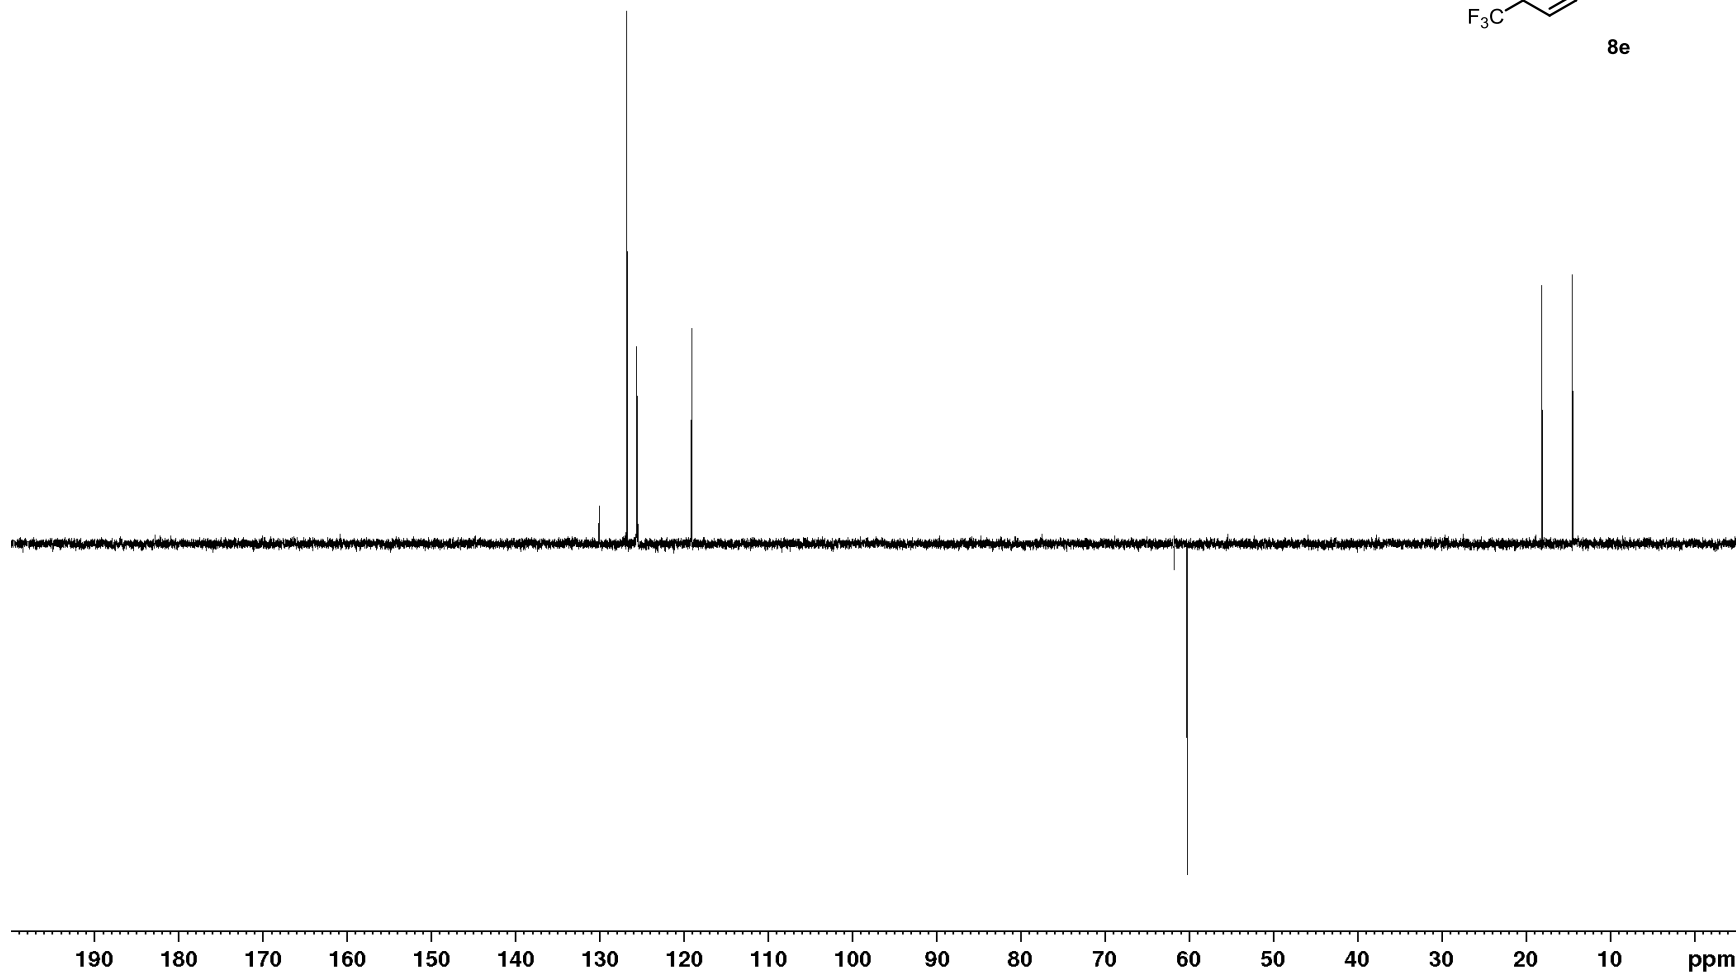

<sup>1</sup>H-<sup>1</sup>H COSY

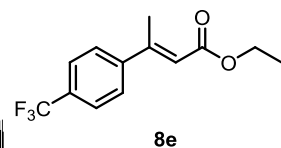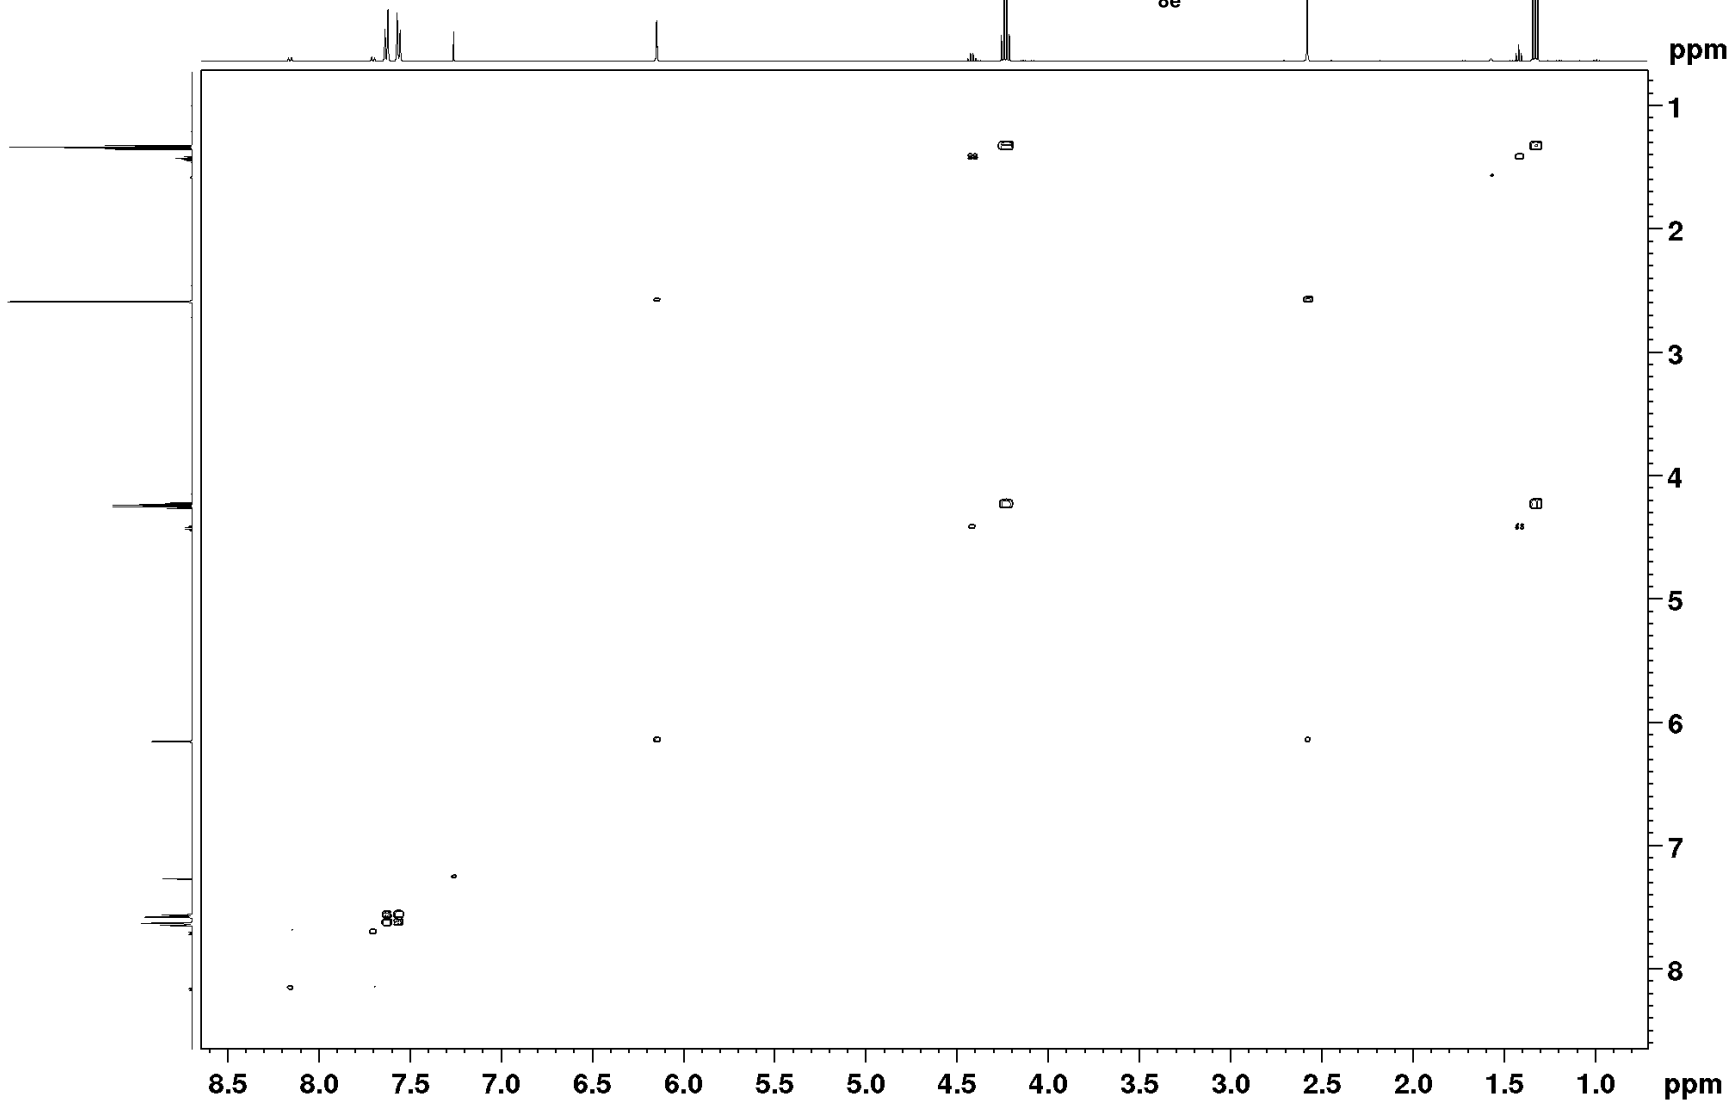

$^1\text{H}$ - $^{13}\text{C}$  HMQC

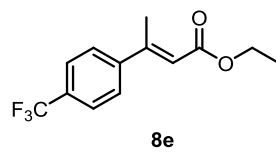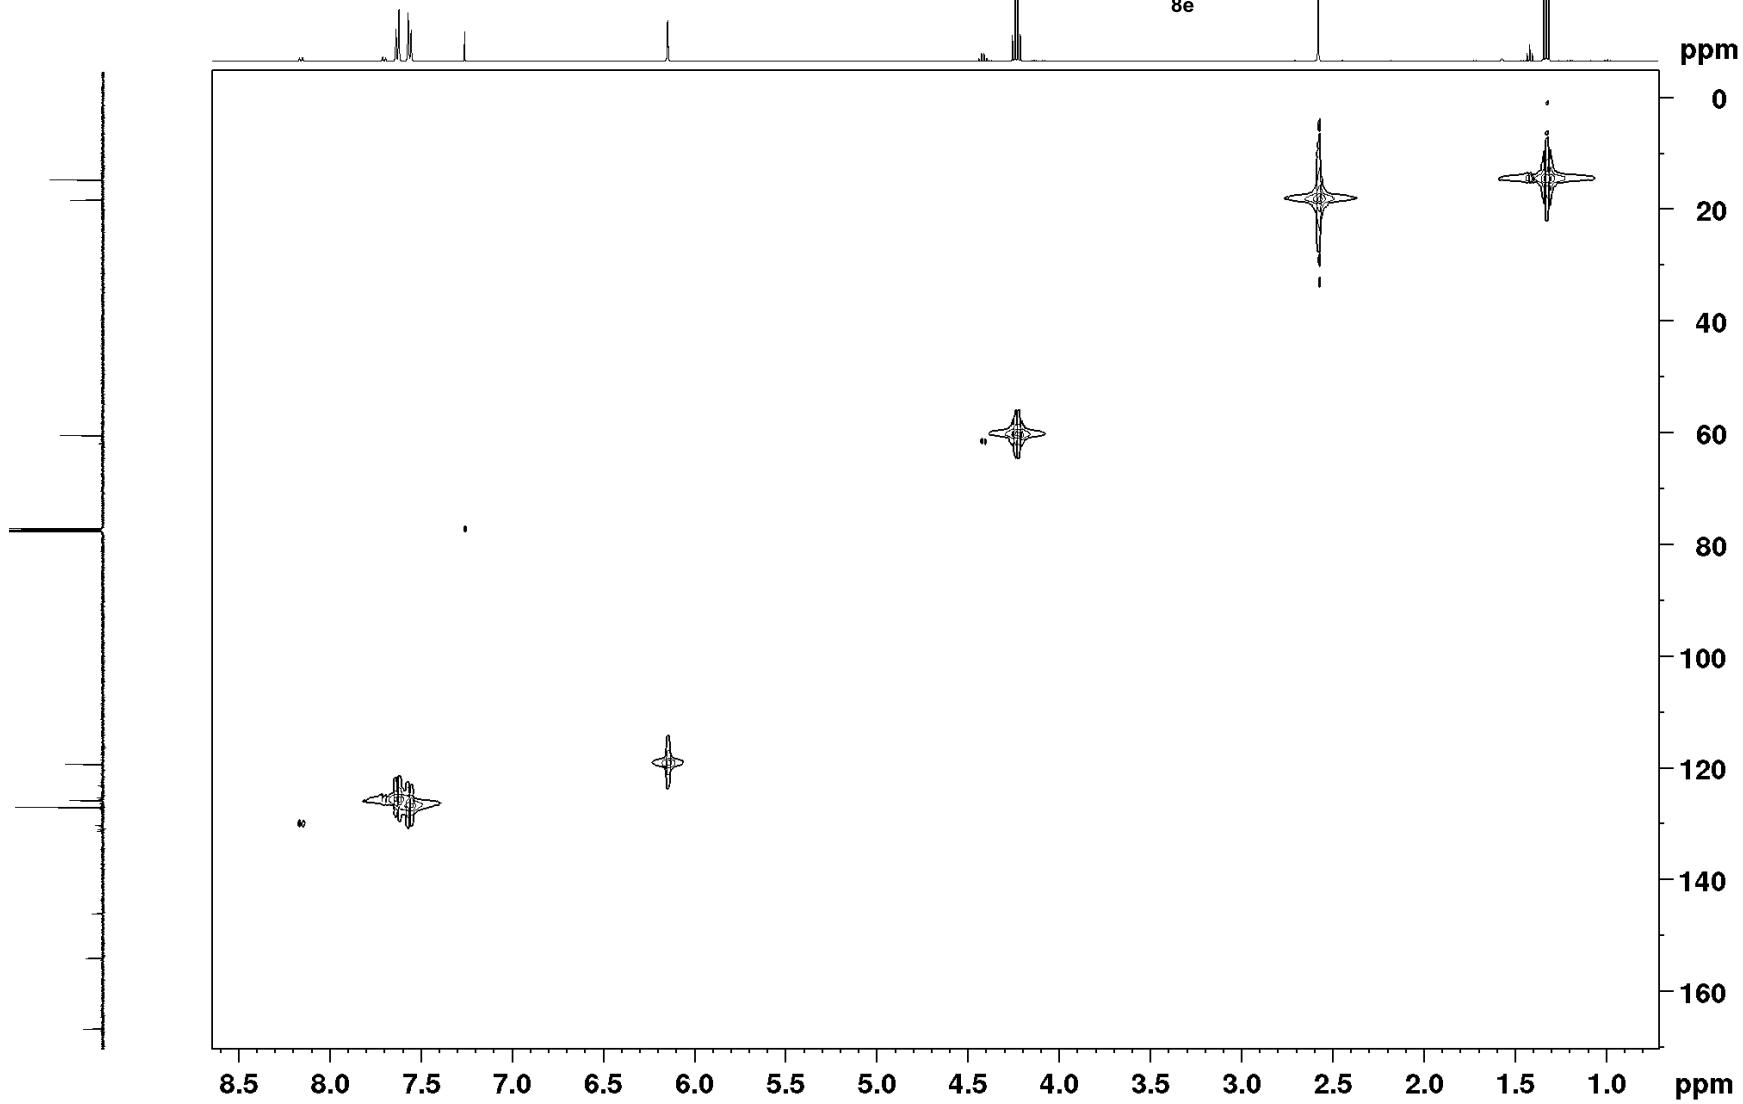

$^1\text{H}$ - $^{13}\text{C}$  HMBC

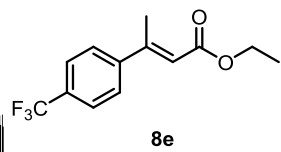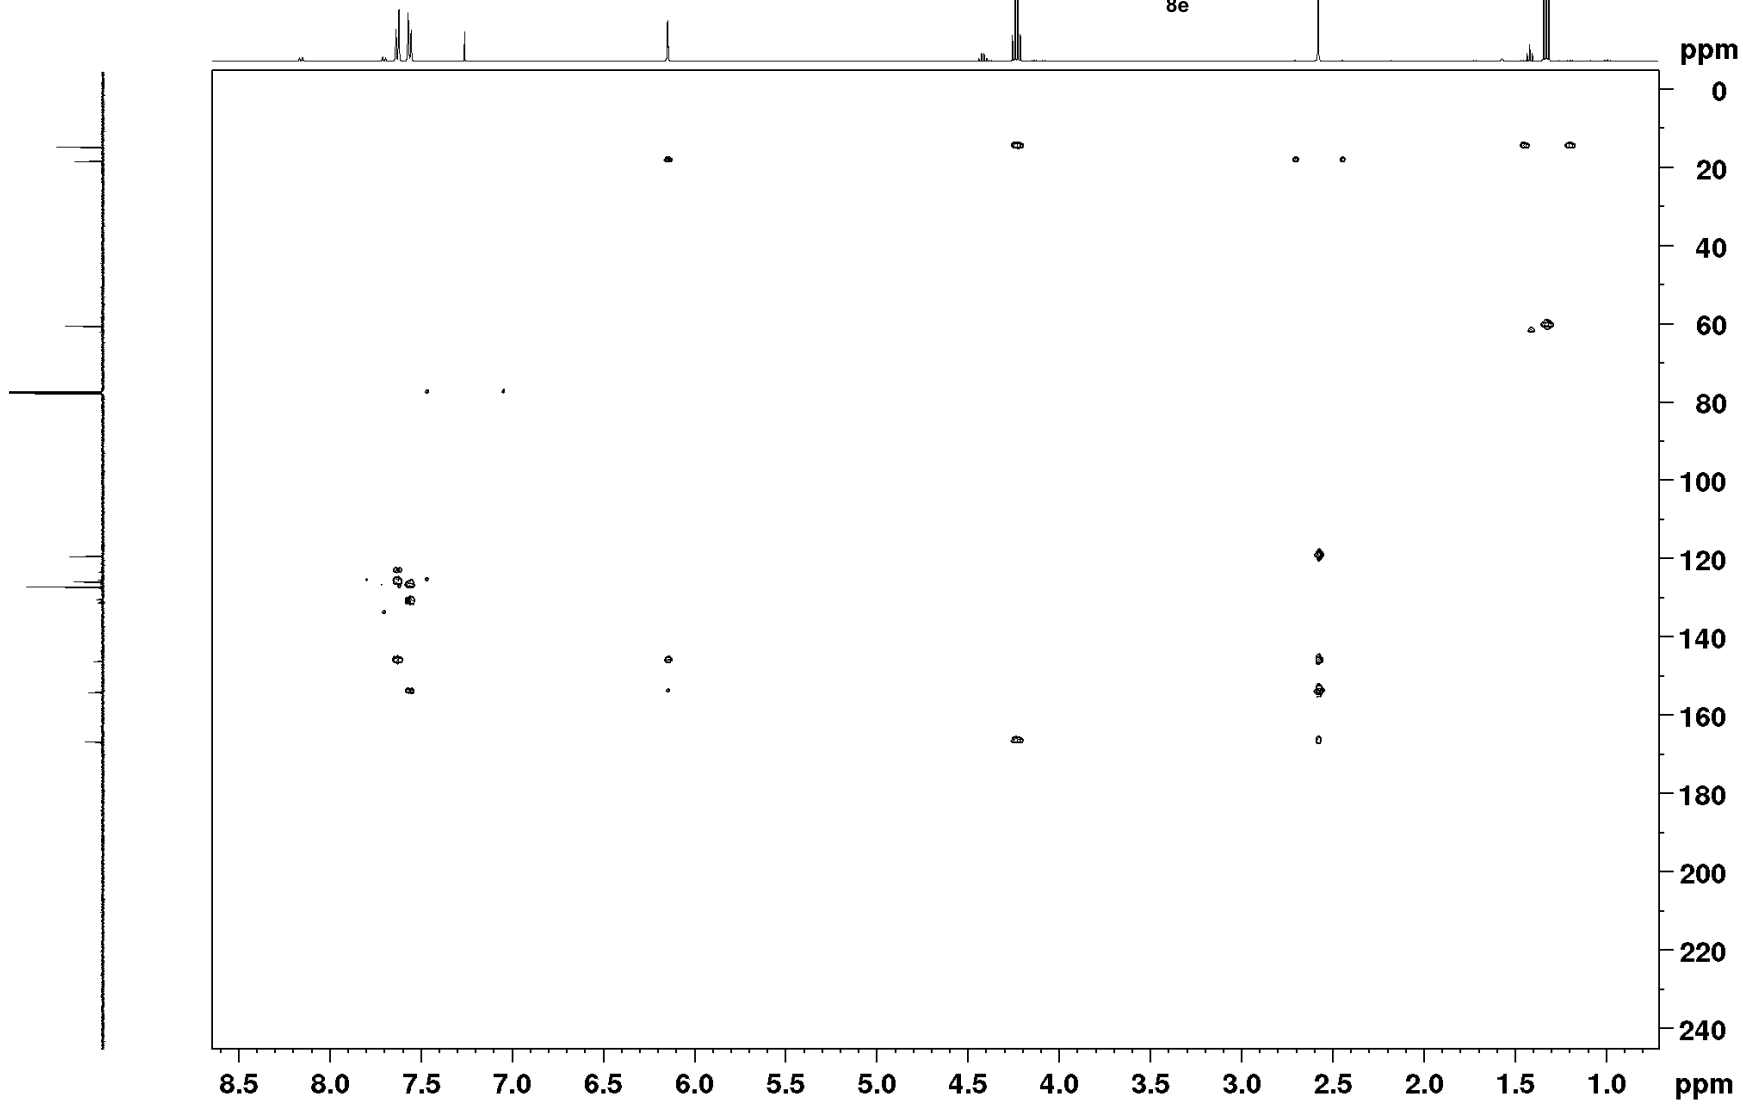

$^1\text{H}$ - $^1\text{H}$  NOESY

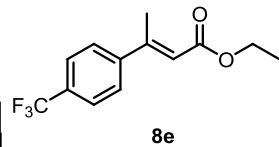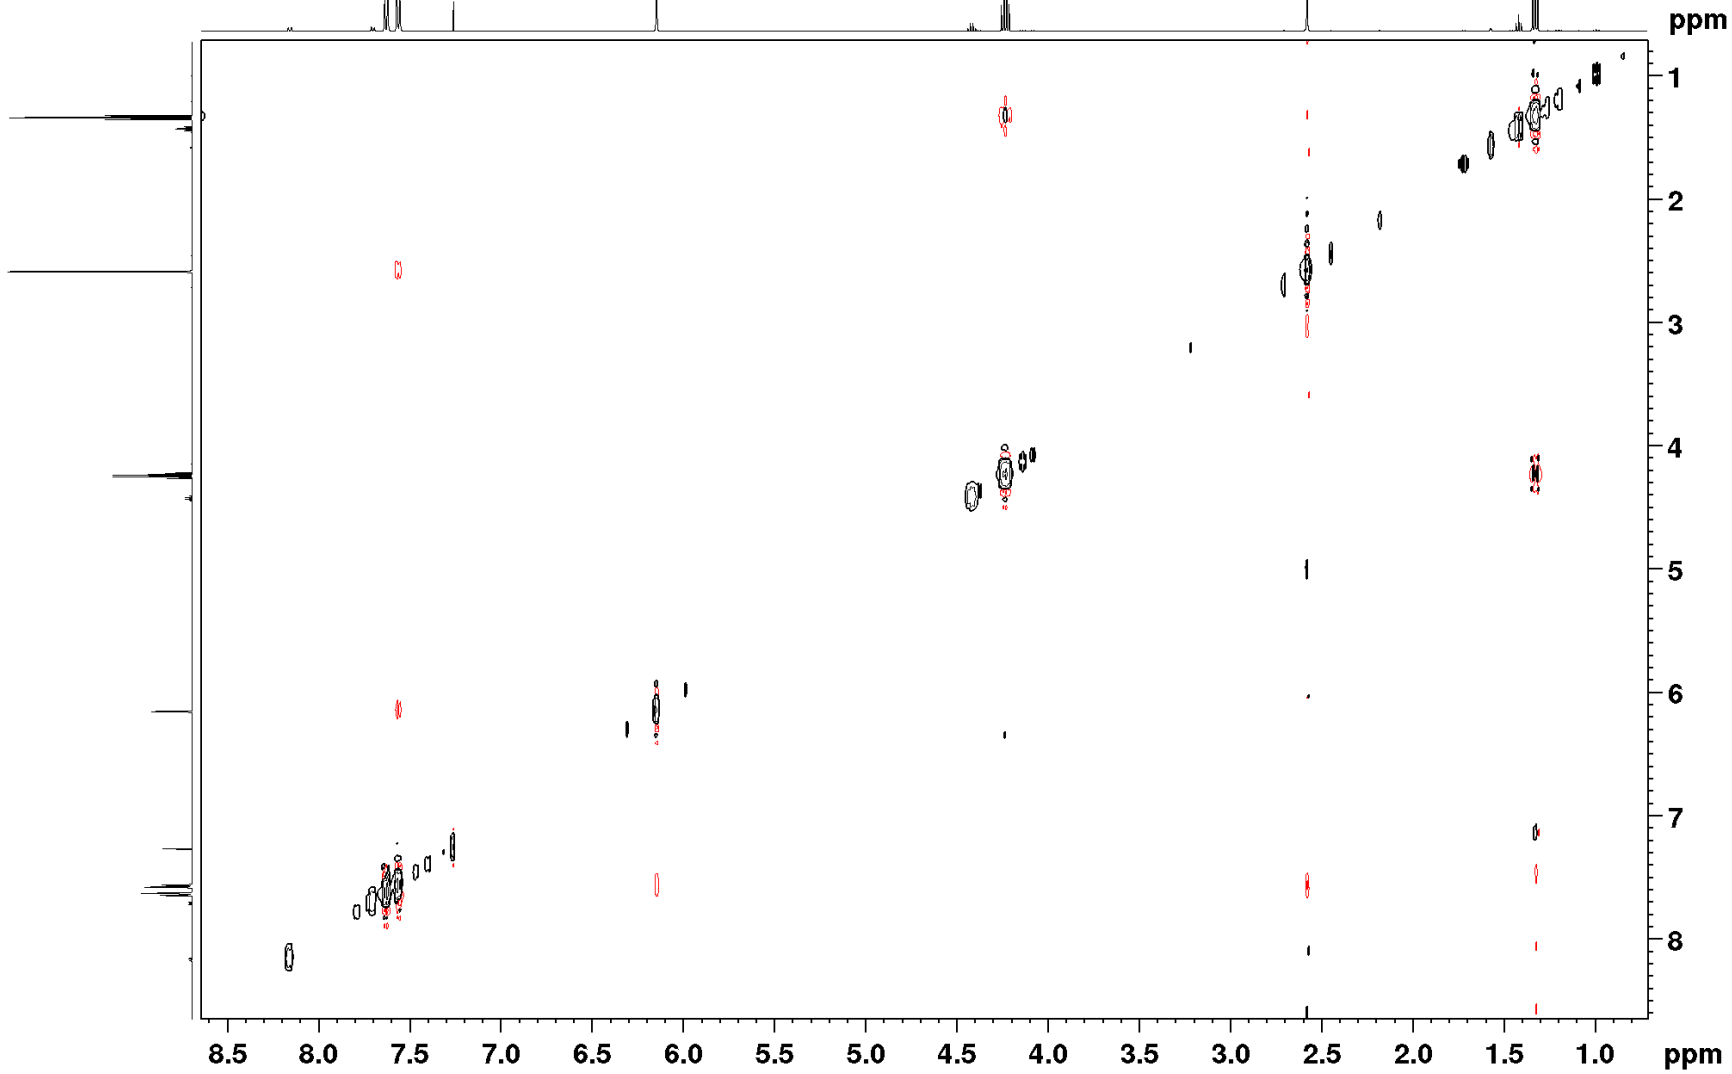

<sup>19</sup>F NMR

-62.71

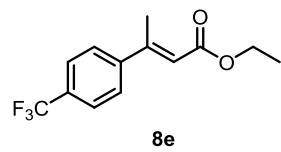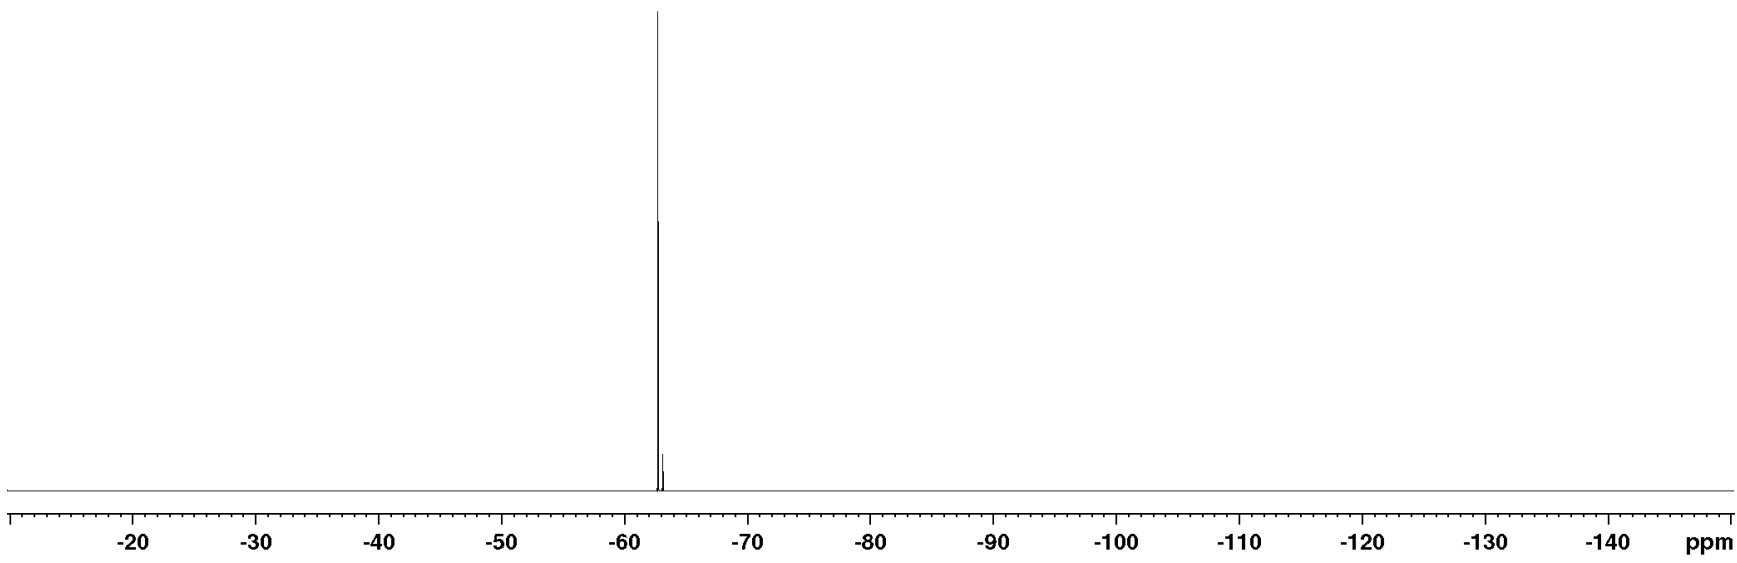



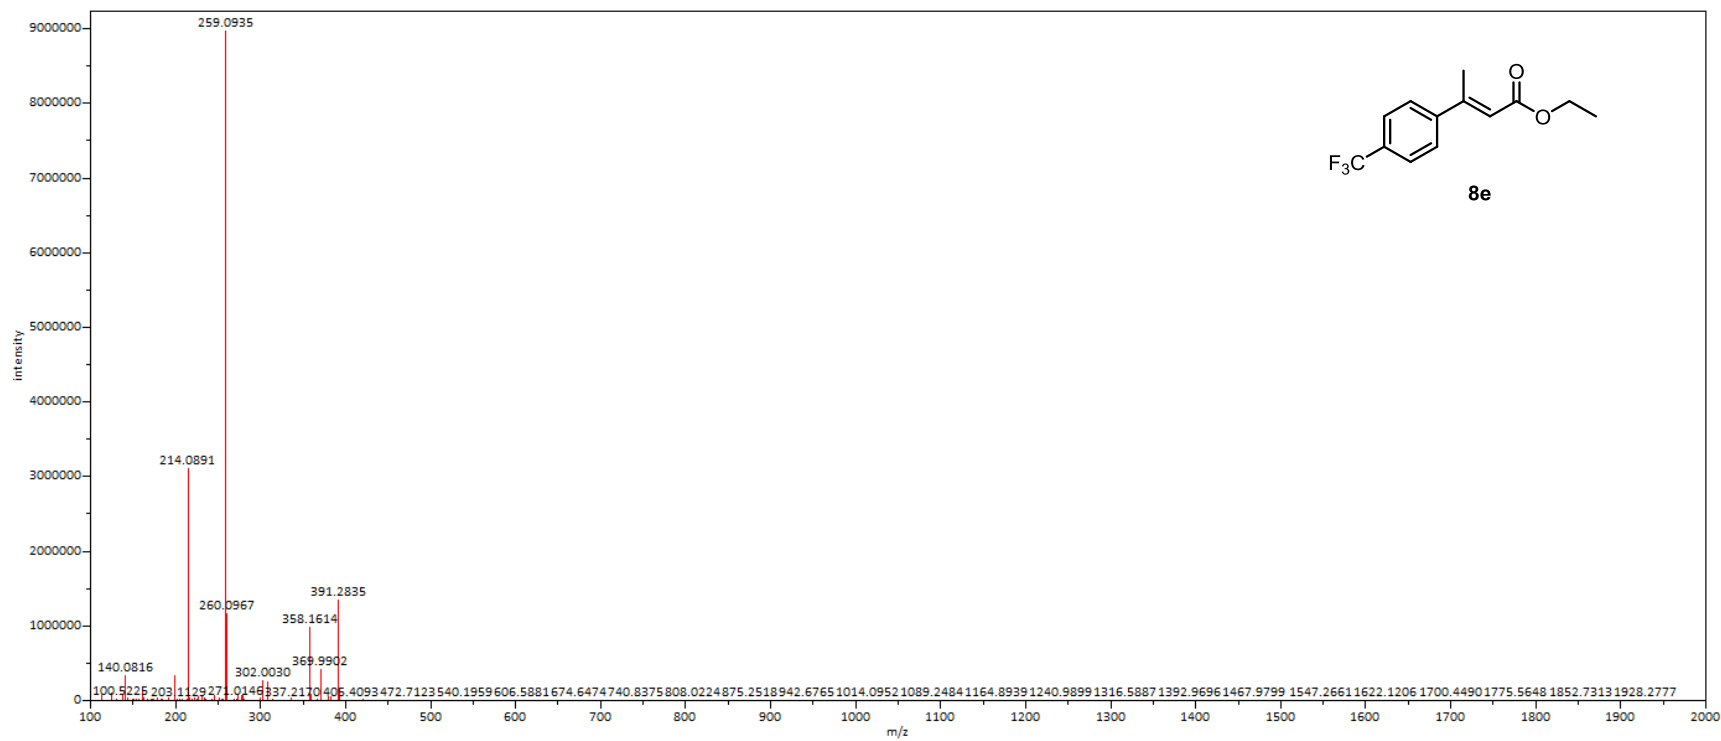

Ethyl (*E*)-3-(4-bromophenyl)but-2-enoate (**8f**)

<sup>1</sup>H NMR

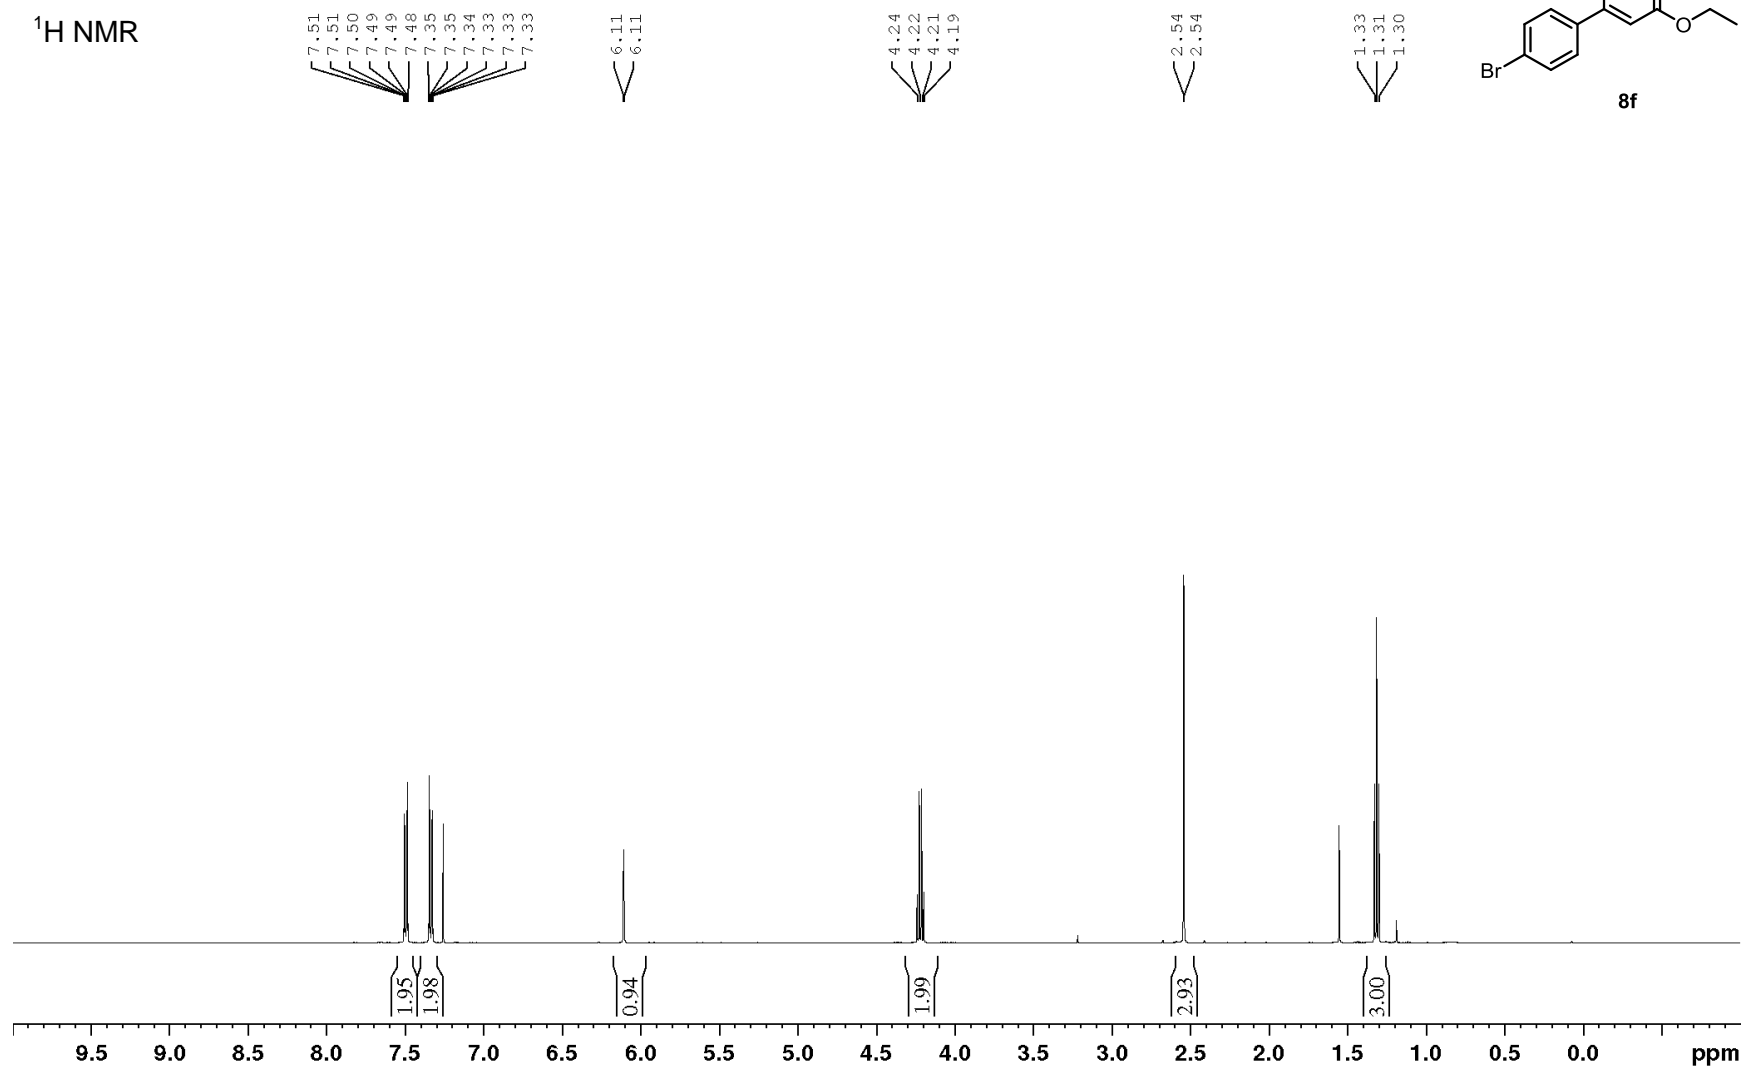

<sup>13</sup>C NMR

166.8

154.2

141.2

131.8

128.0

123.4

117.8

60.1

17.9

14.5

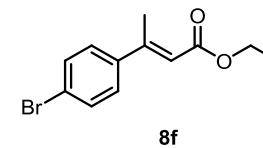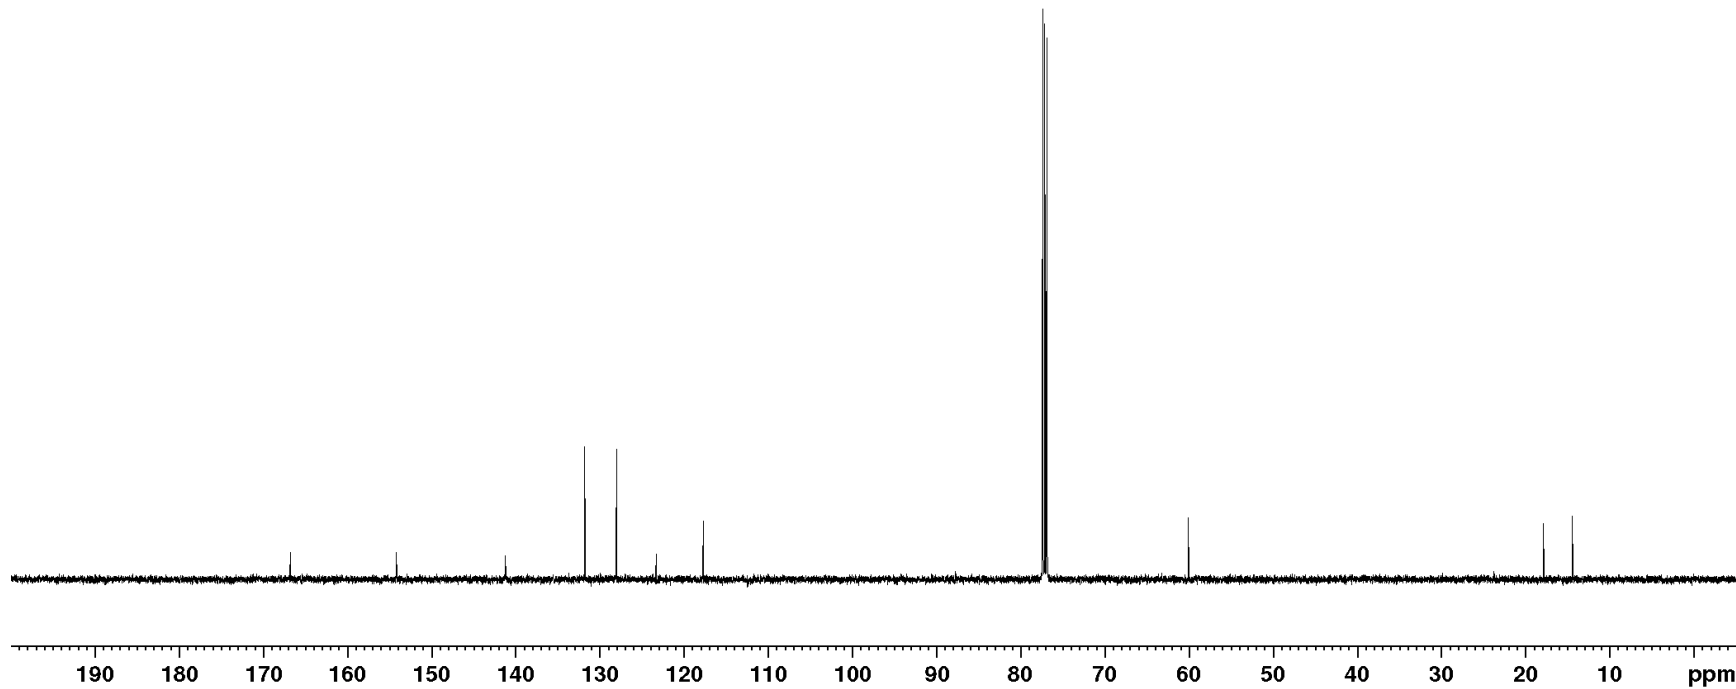

<sup>13</sup>C DEPT NMR

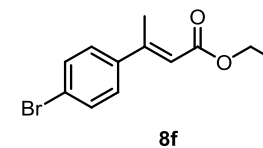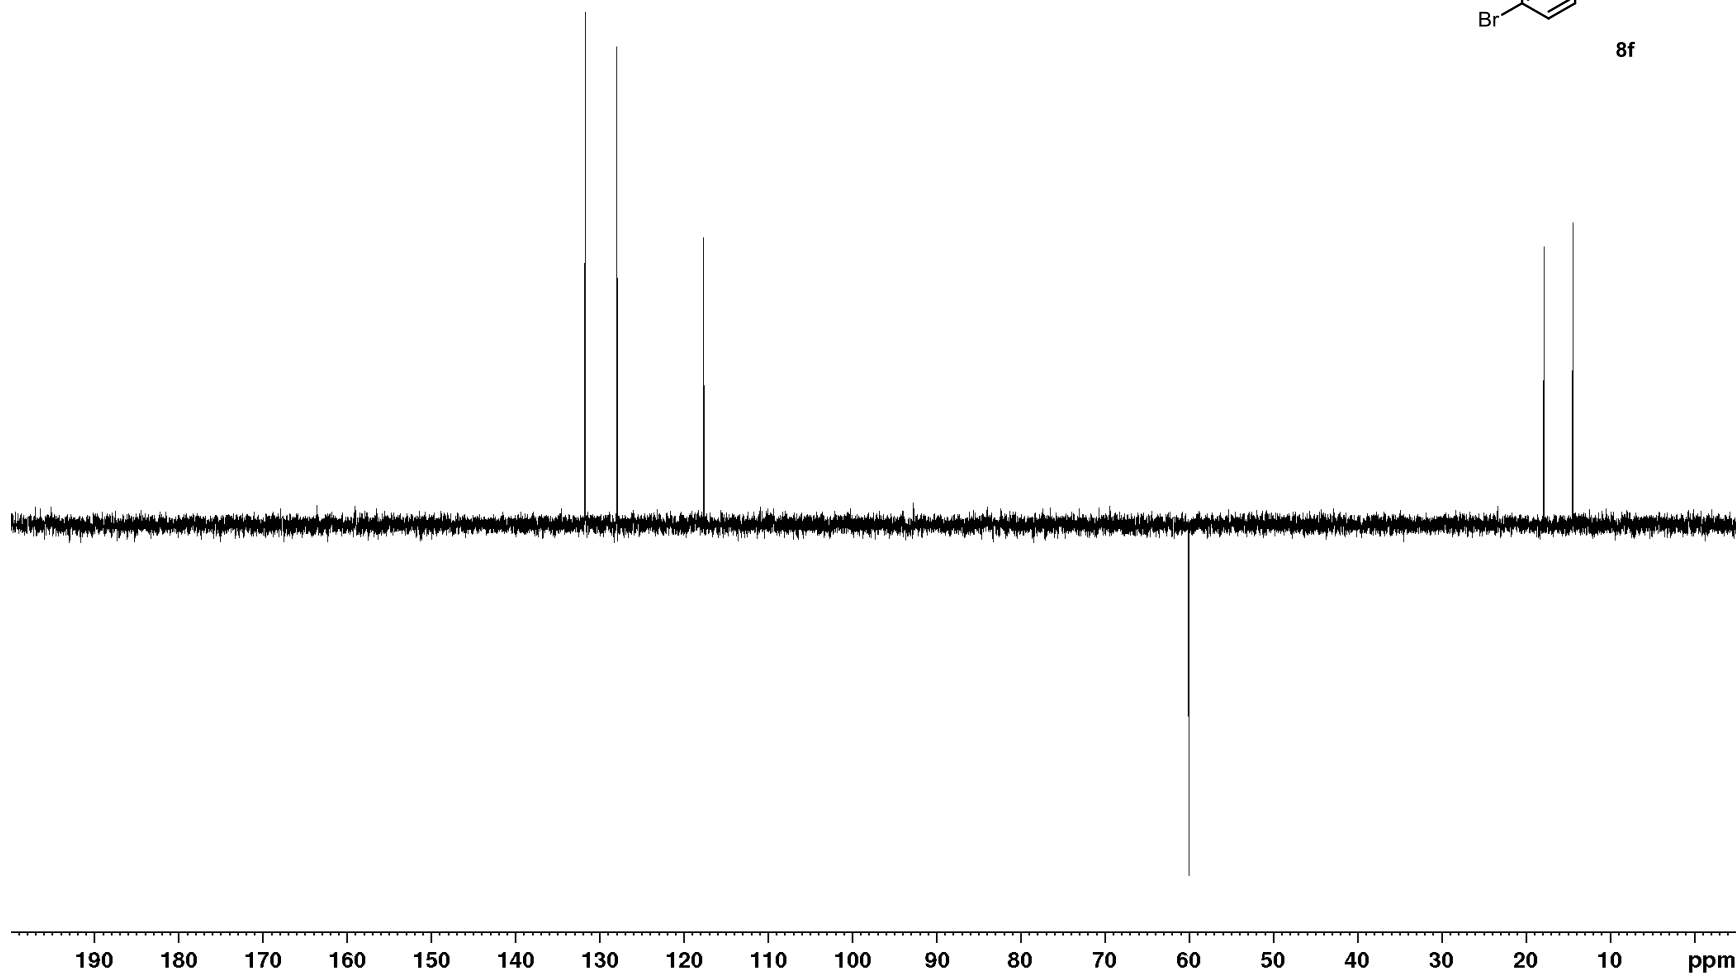

<sup>1</sup>H-<sup>1</sup>H COSY

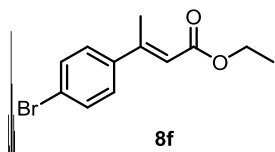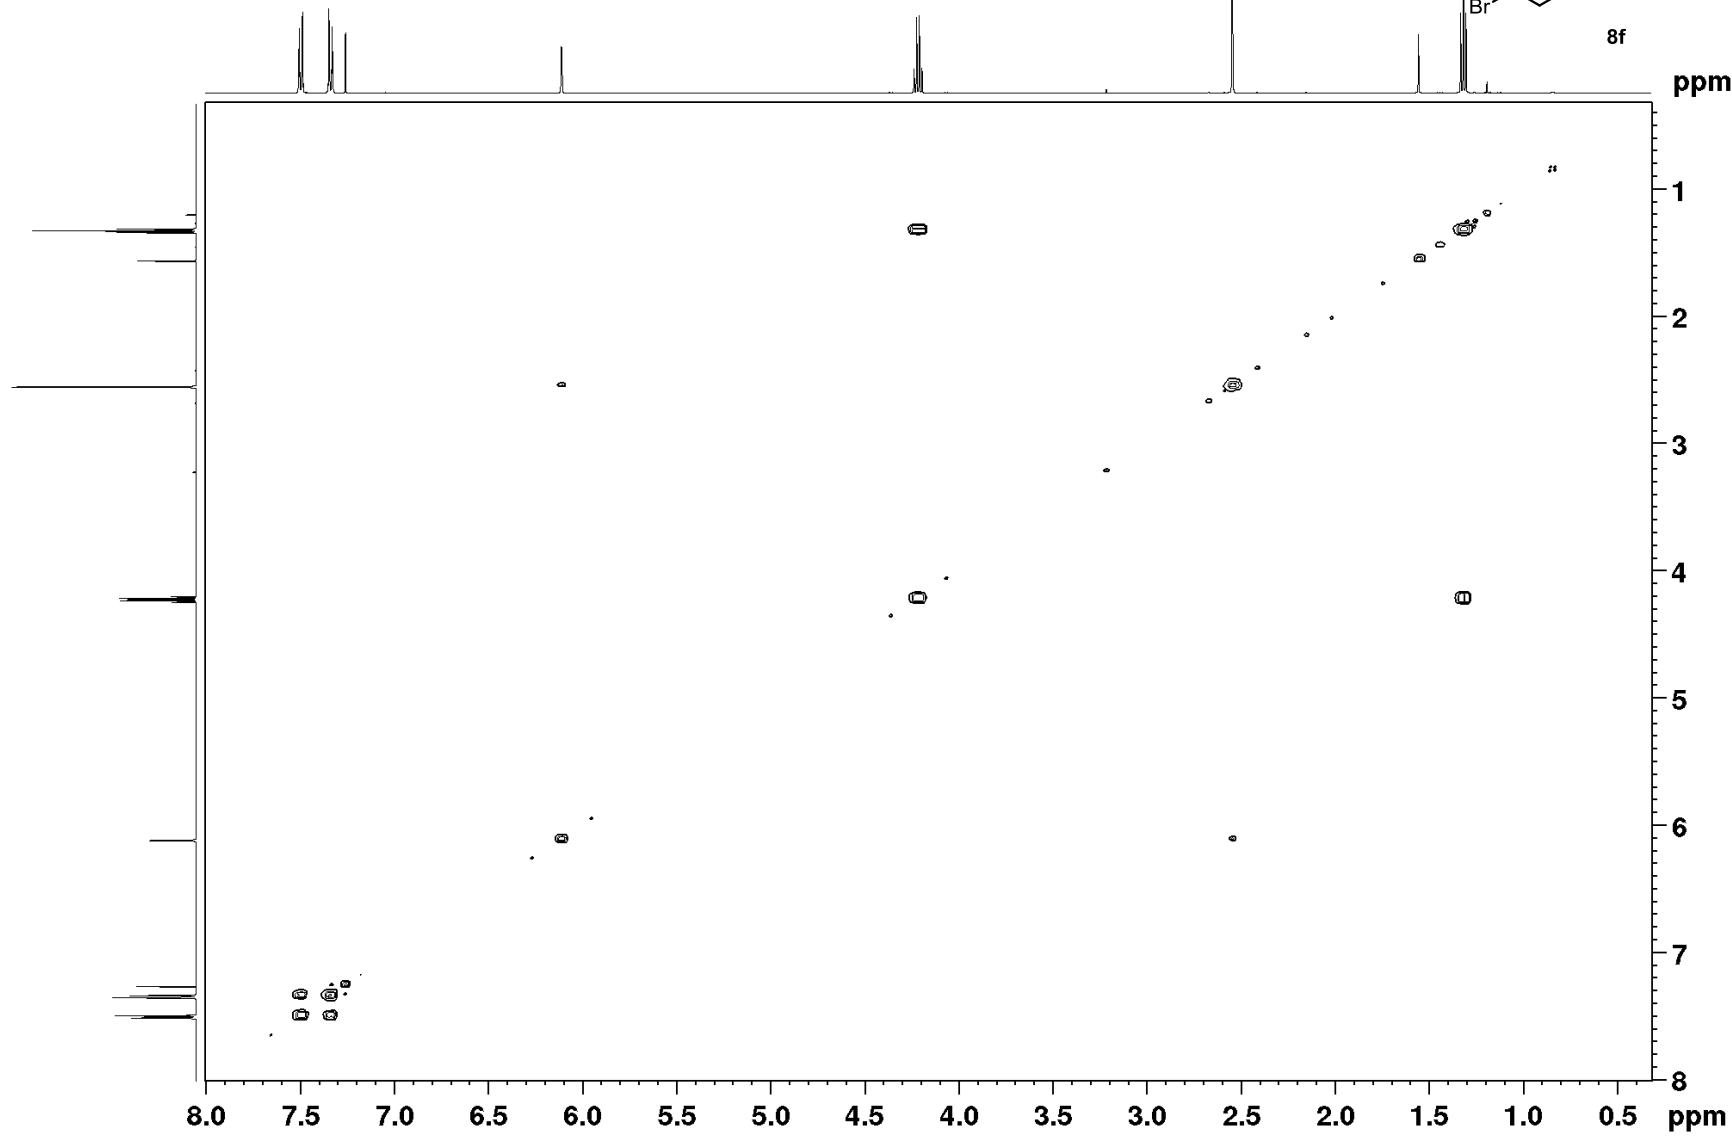

$^1\text{H}$ - $^{13}\text{C}$  HMQC

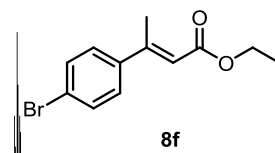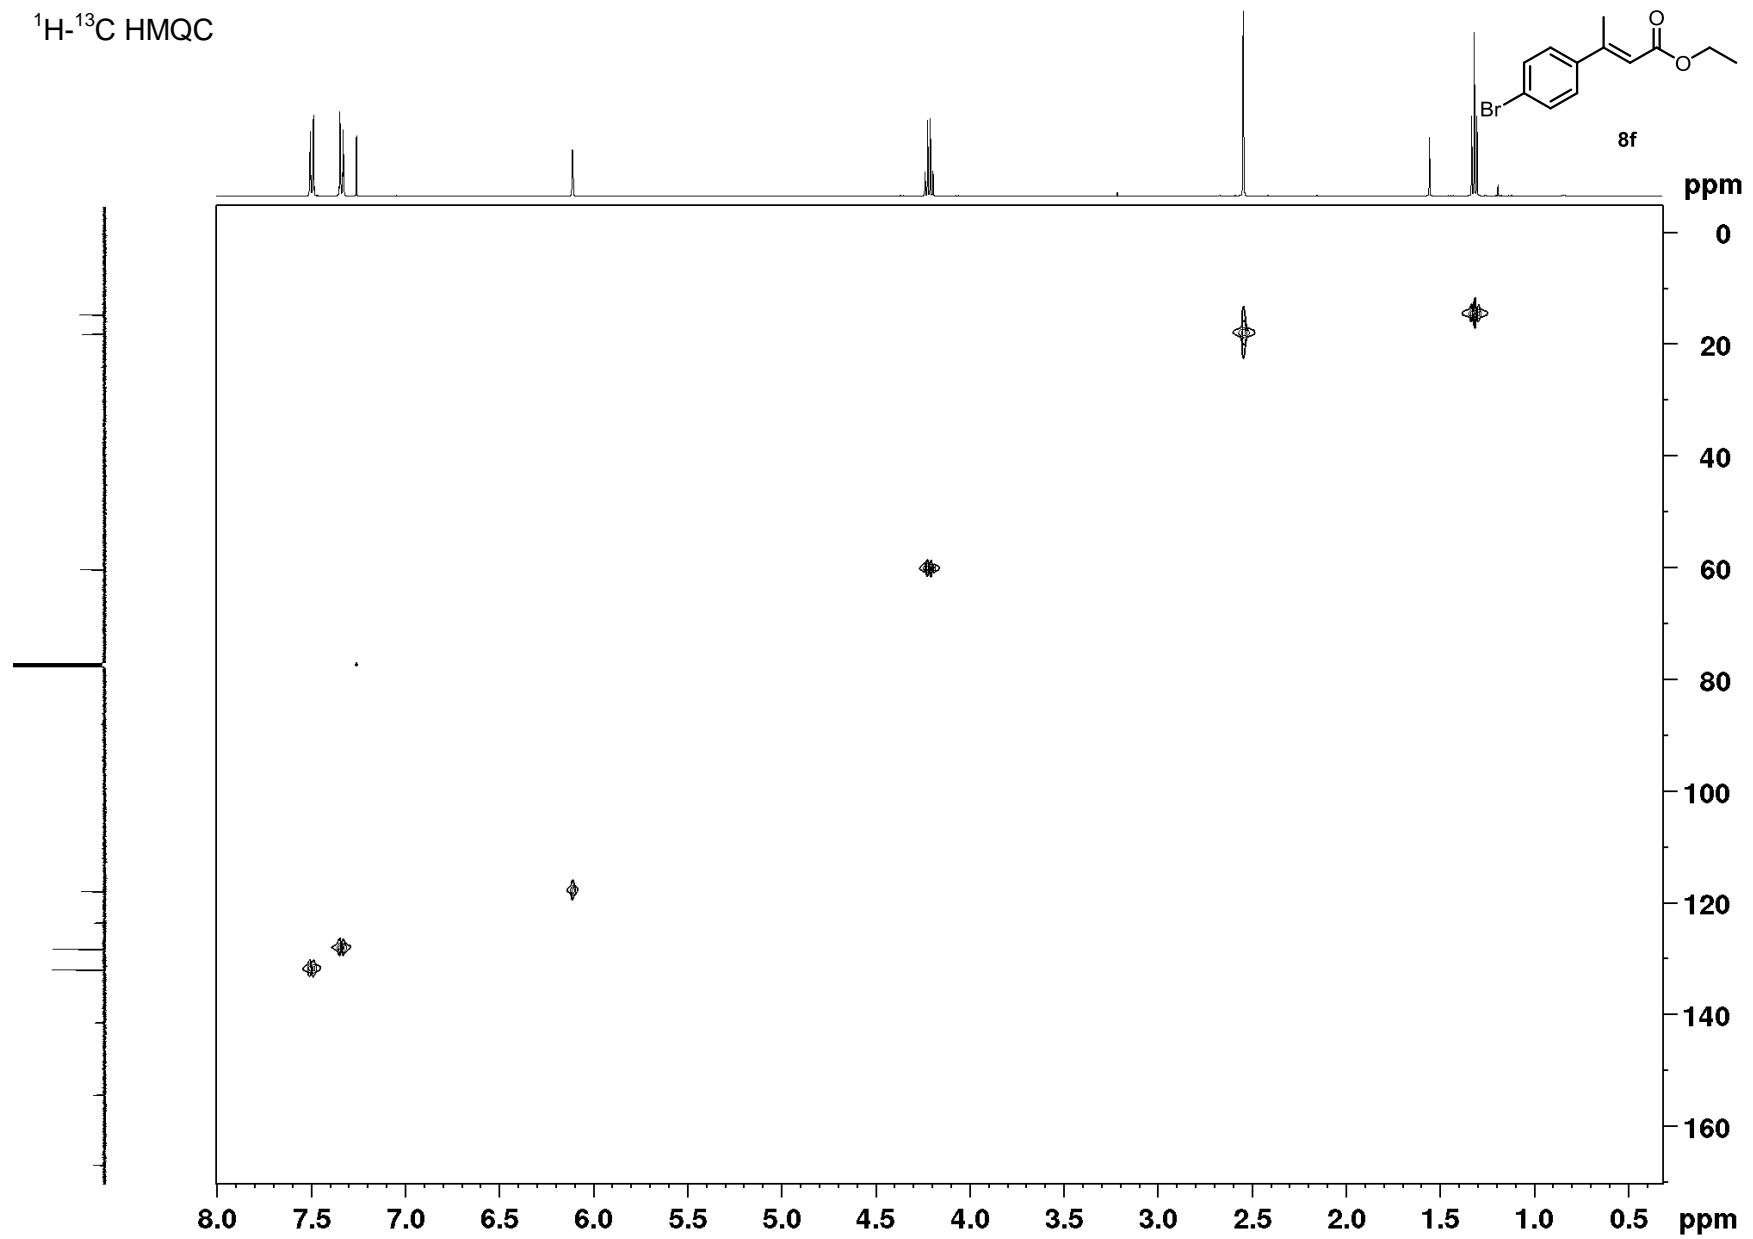

$^1\text{H}$ - $^{13}\text{C}$  HMBC

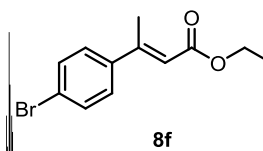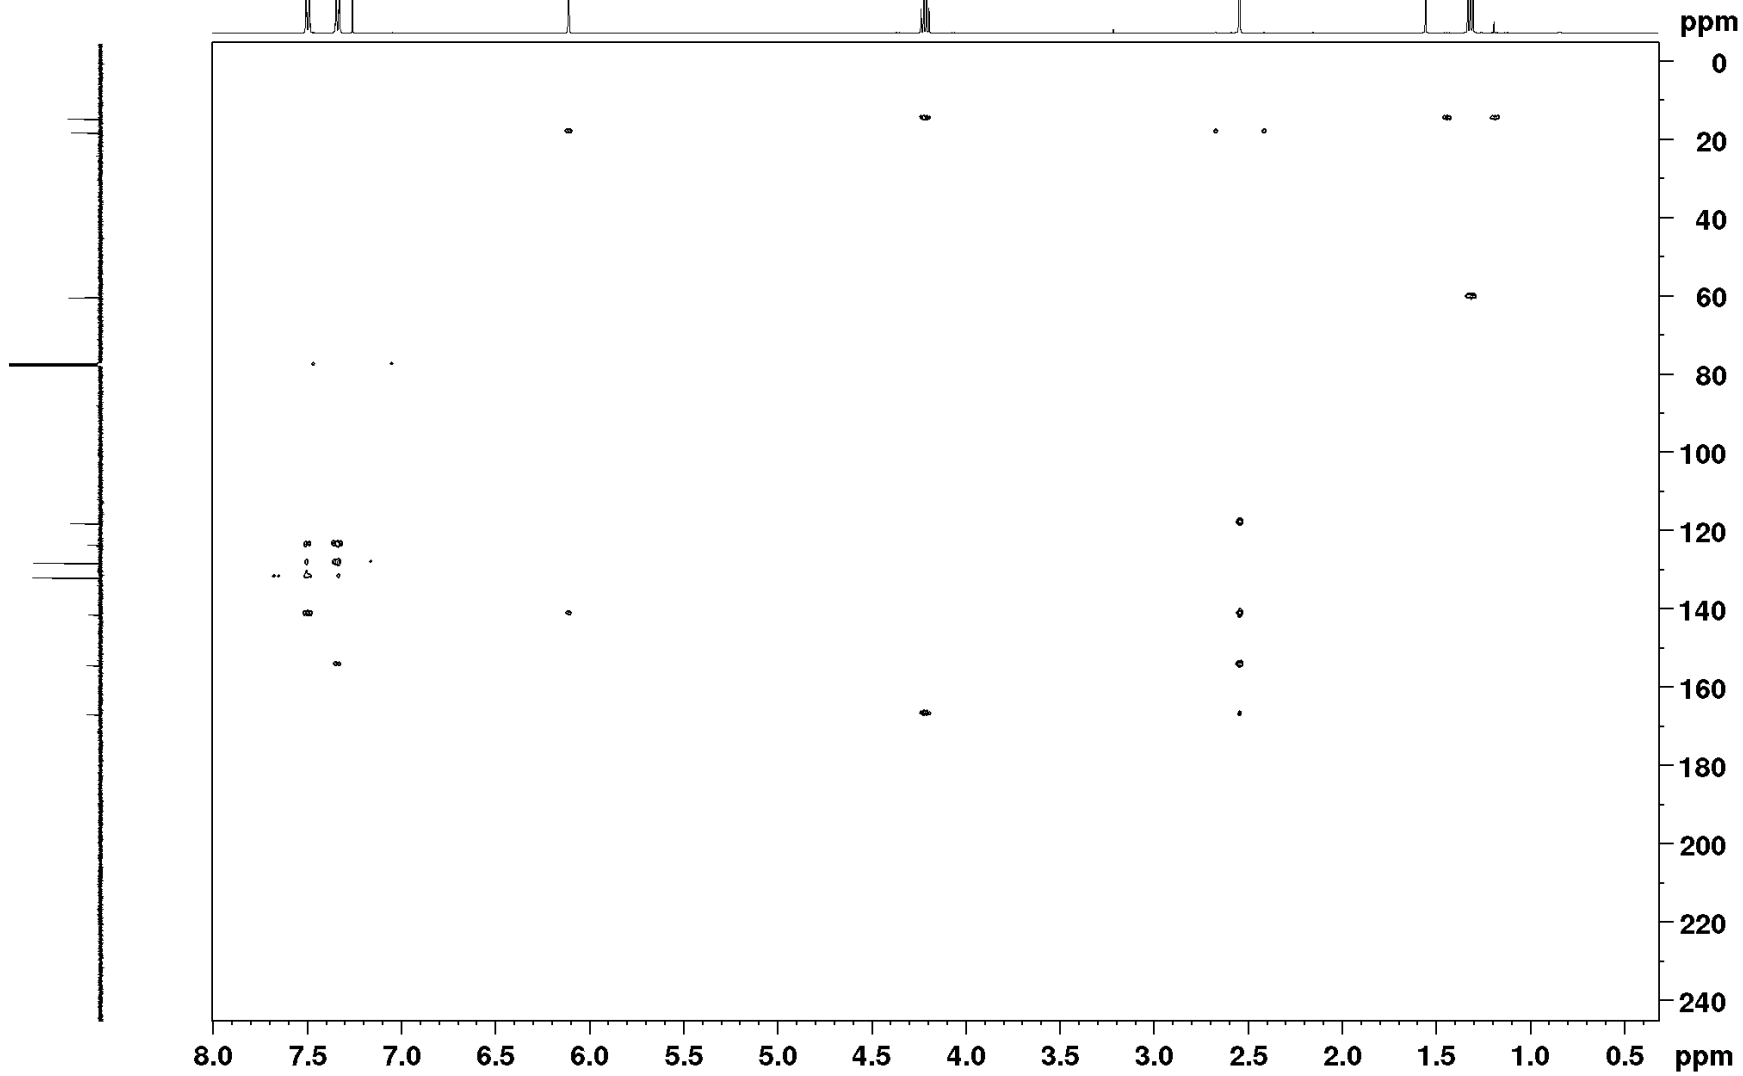

S387

$^1\text{H}$ - $^1\text{H}$  NOESY

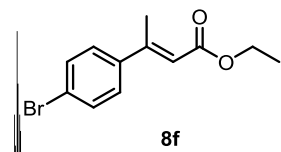

ppm

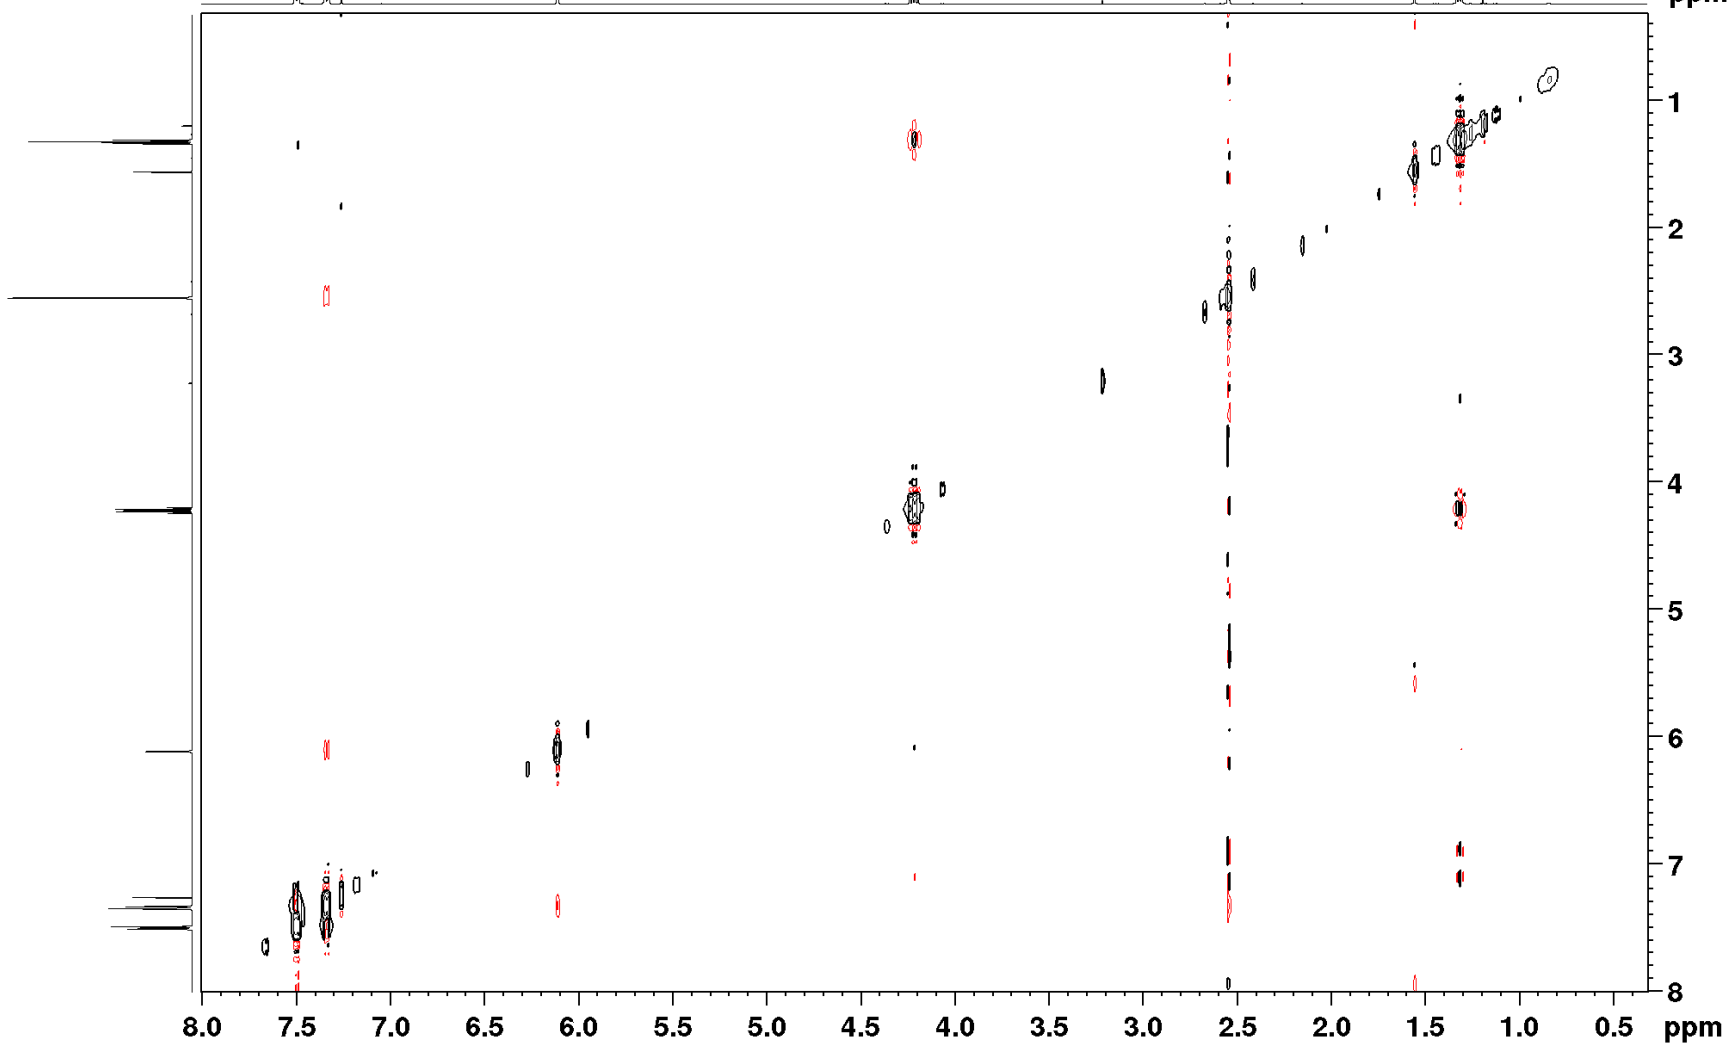

S388



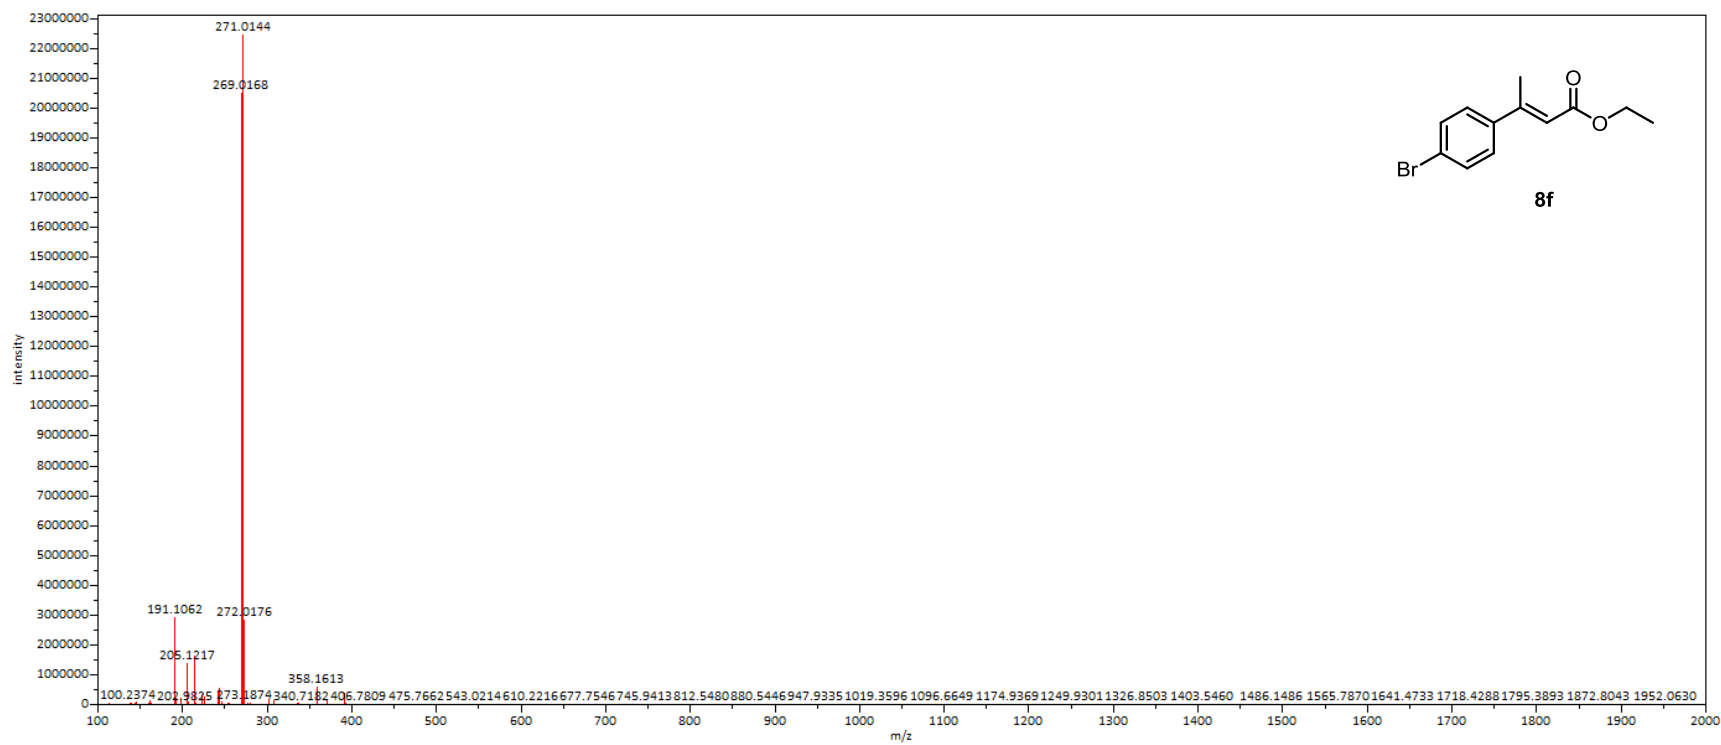

Ethyl (*E*)-3-(4-chlorophenyl)but-2-enoate (**8g**)

<sup>1</sup>H NMR

7.42  
7.41  
7.41  
7.40  
7.40  
7.39  
7.35  
7.35  
7.34  
7.33  
7.33  
7.32

6.11  
6.11  
6.11  
6.10

4.24  
4.22  
4.21  
4.19

2.55  
2.54

1.33  
1.31  
1.30

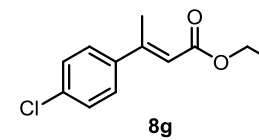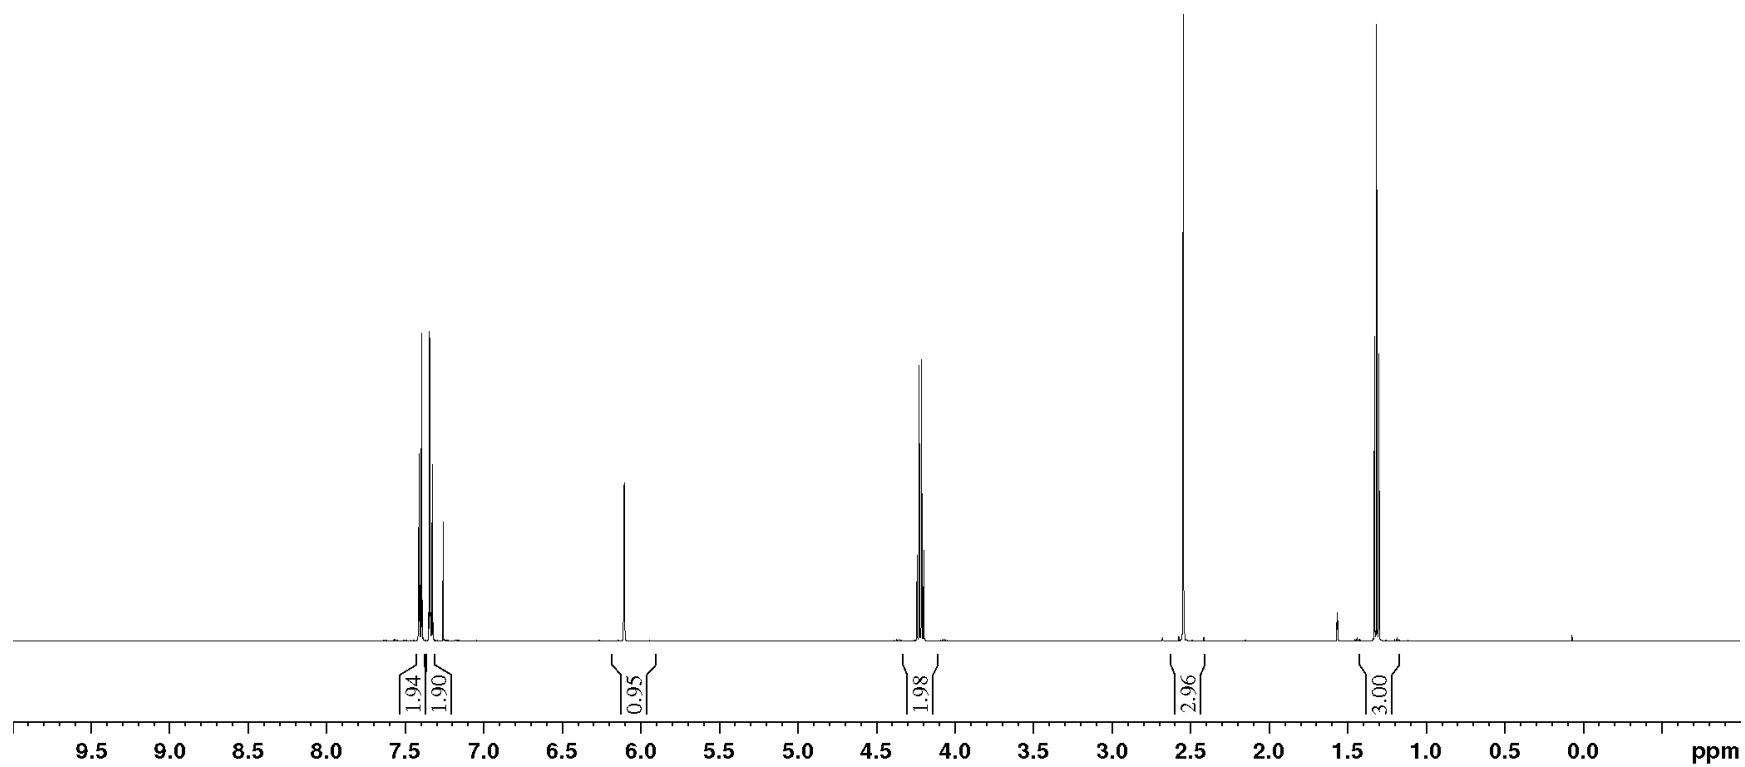

<sup>13</sup>C NMR

166.8

154.1

140.7

135.1

128.8

127.8

117.7

60.1

18.0

14.5

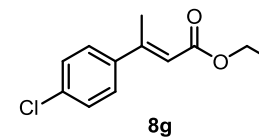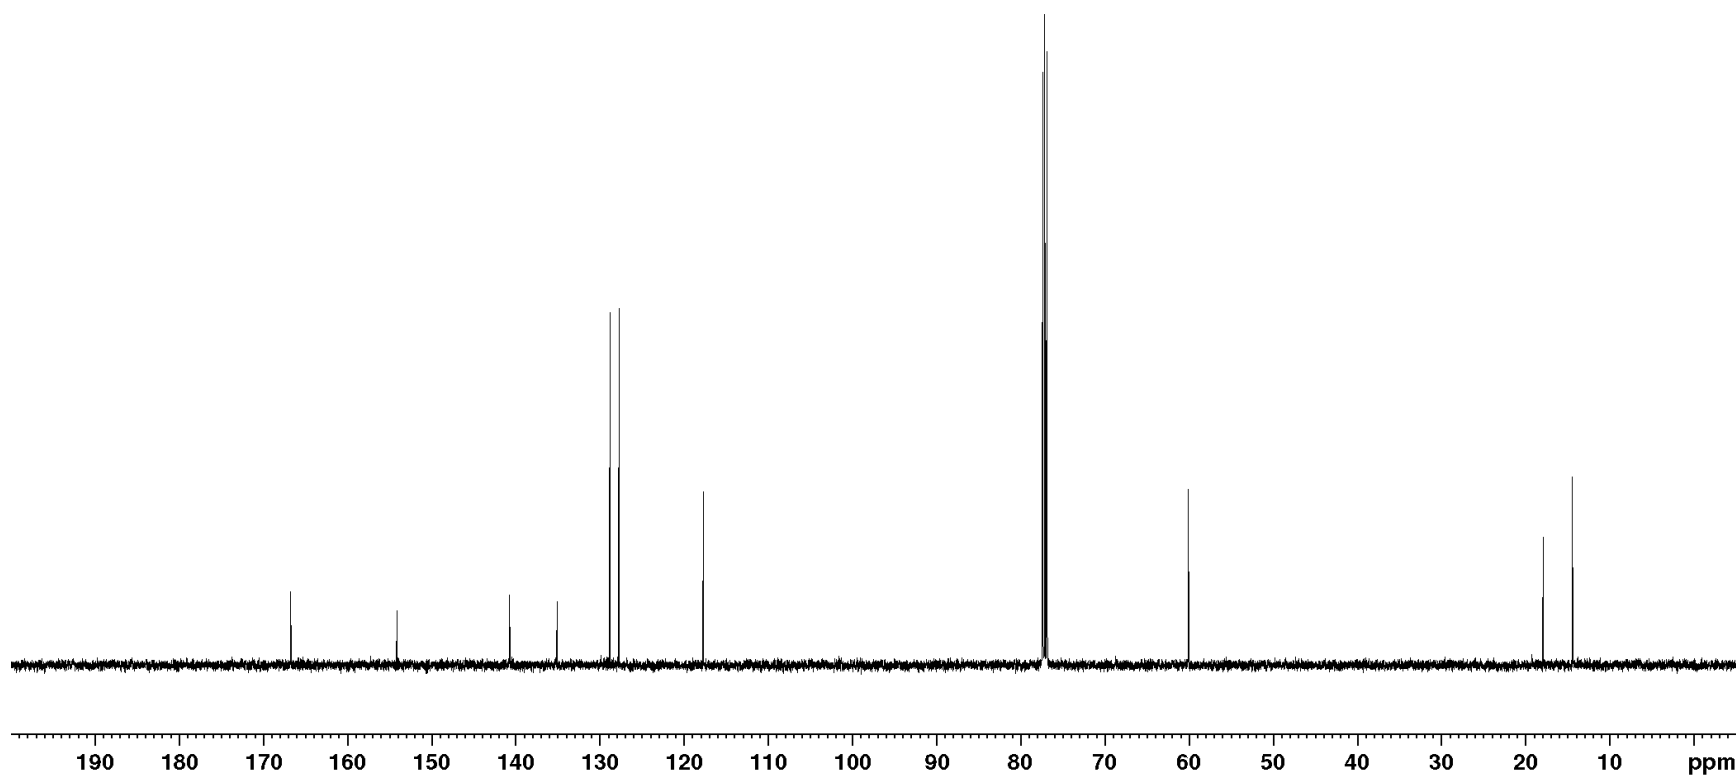

$^1\text{H}$ - $^1\text{H}$  COSY

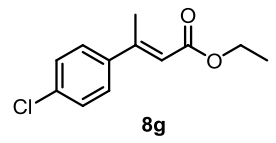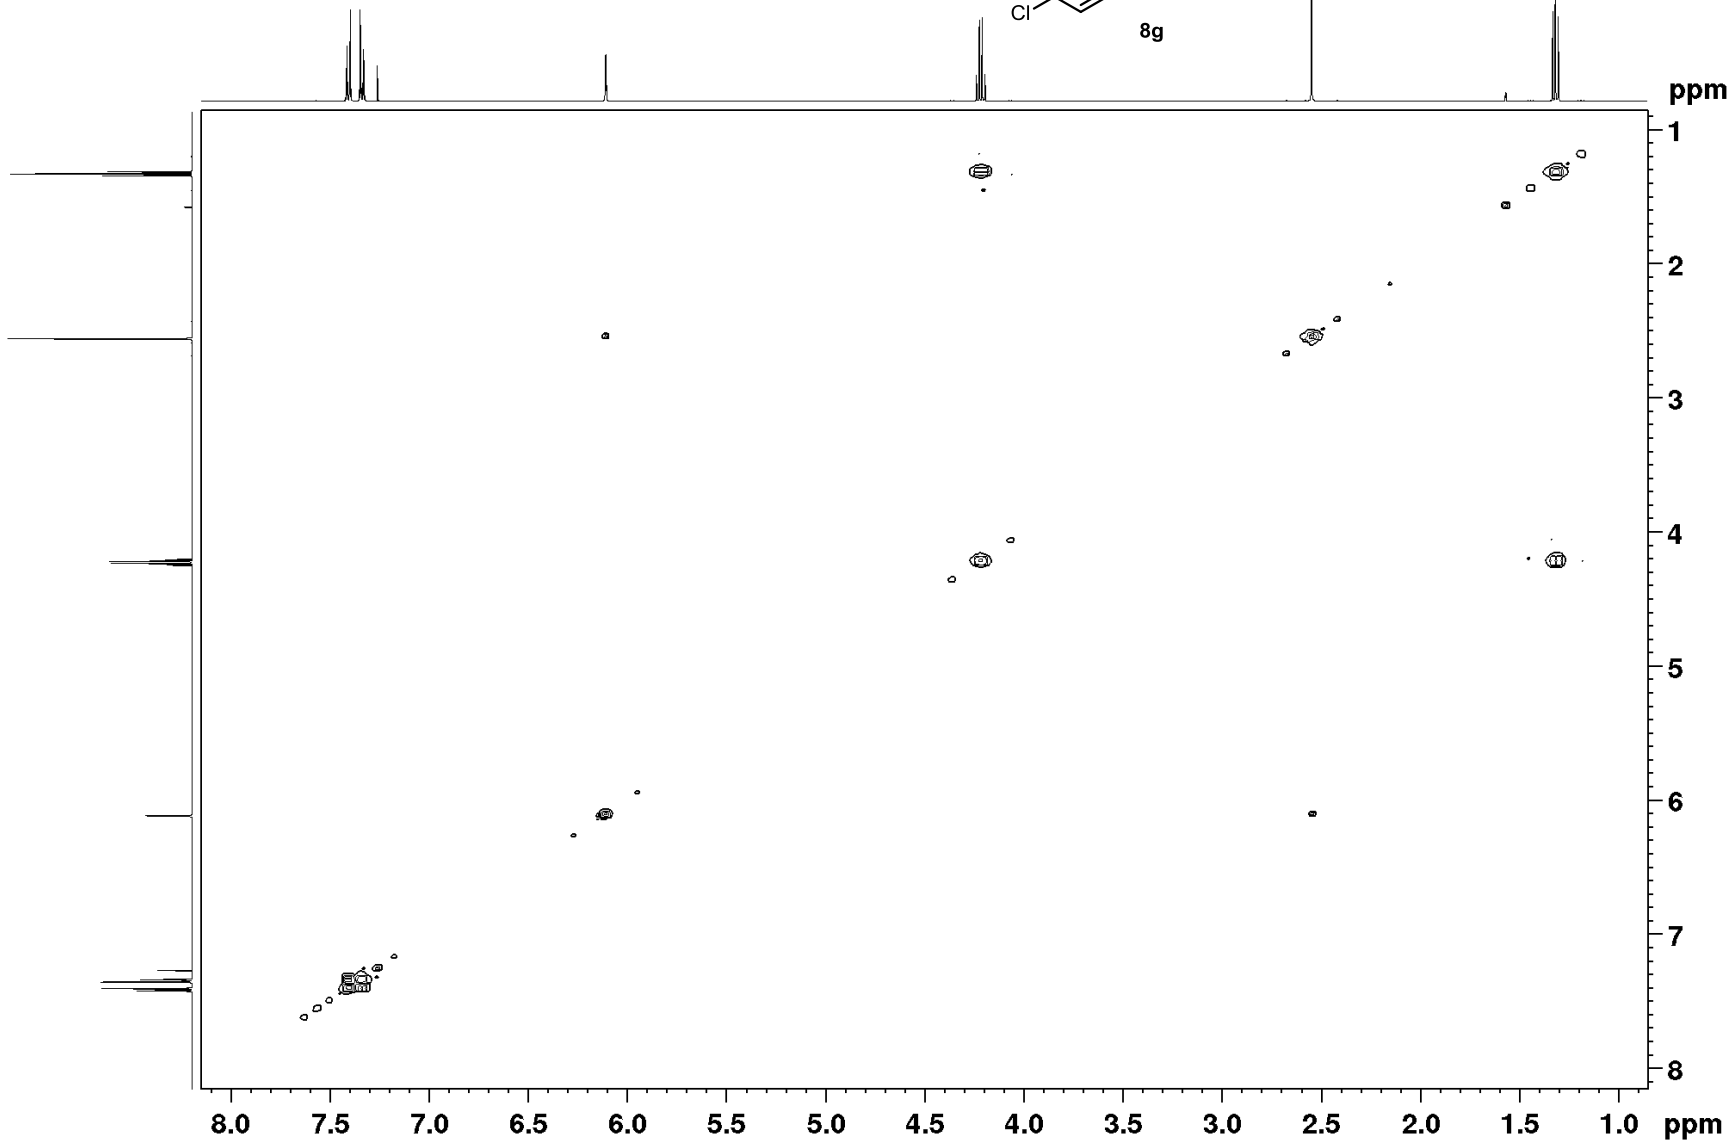

$^1\text{H}$ - $^{13}\text{C}$  HSQC

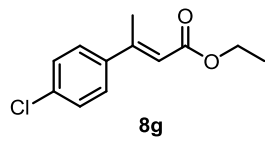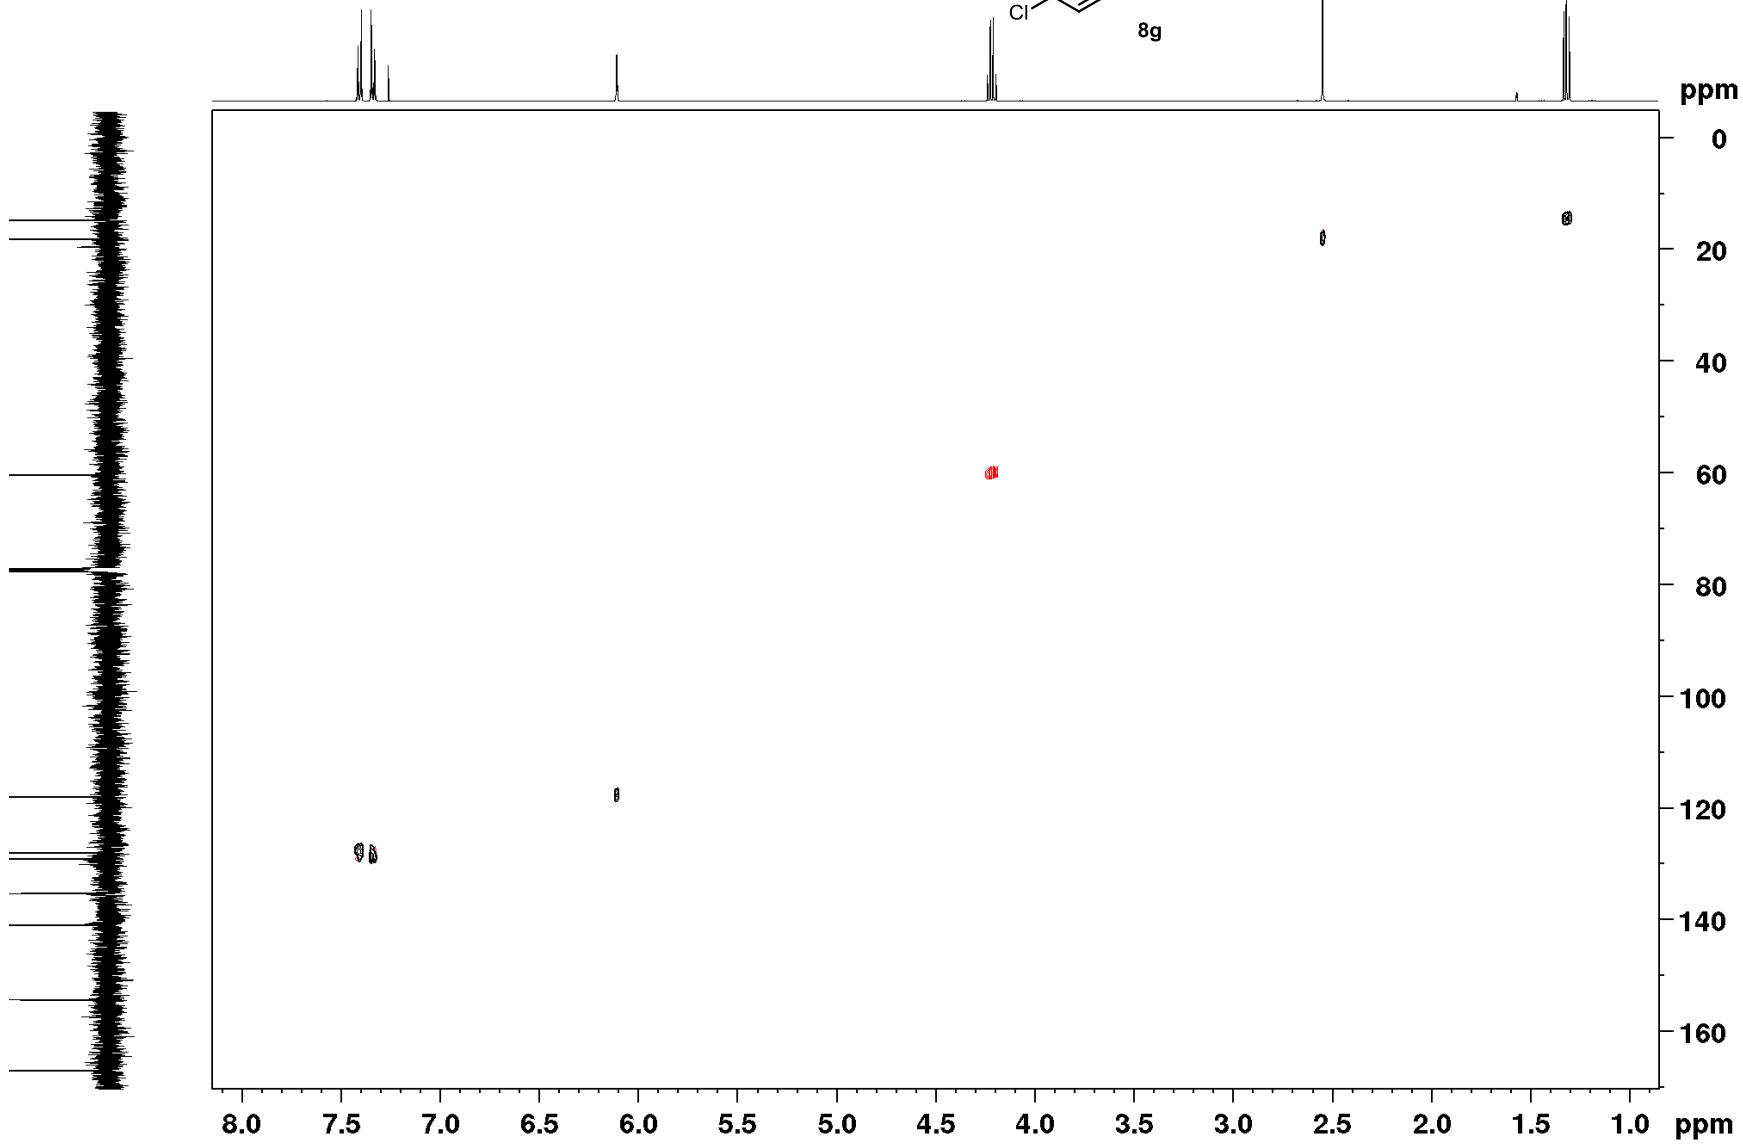

S393

$^1\text{H}$ - $^{13}\text{C}$  HMBC

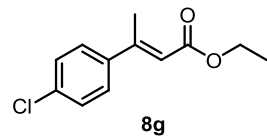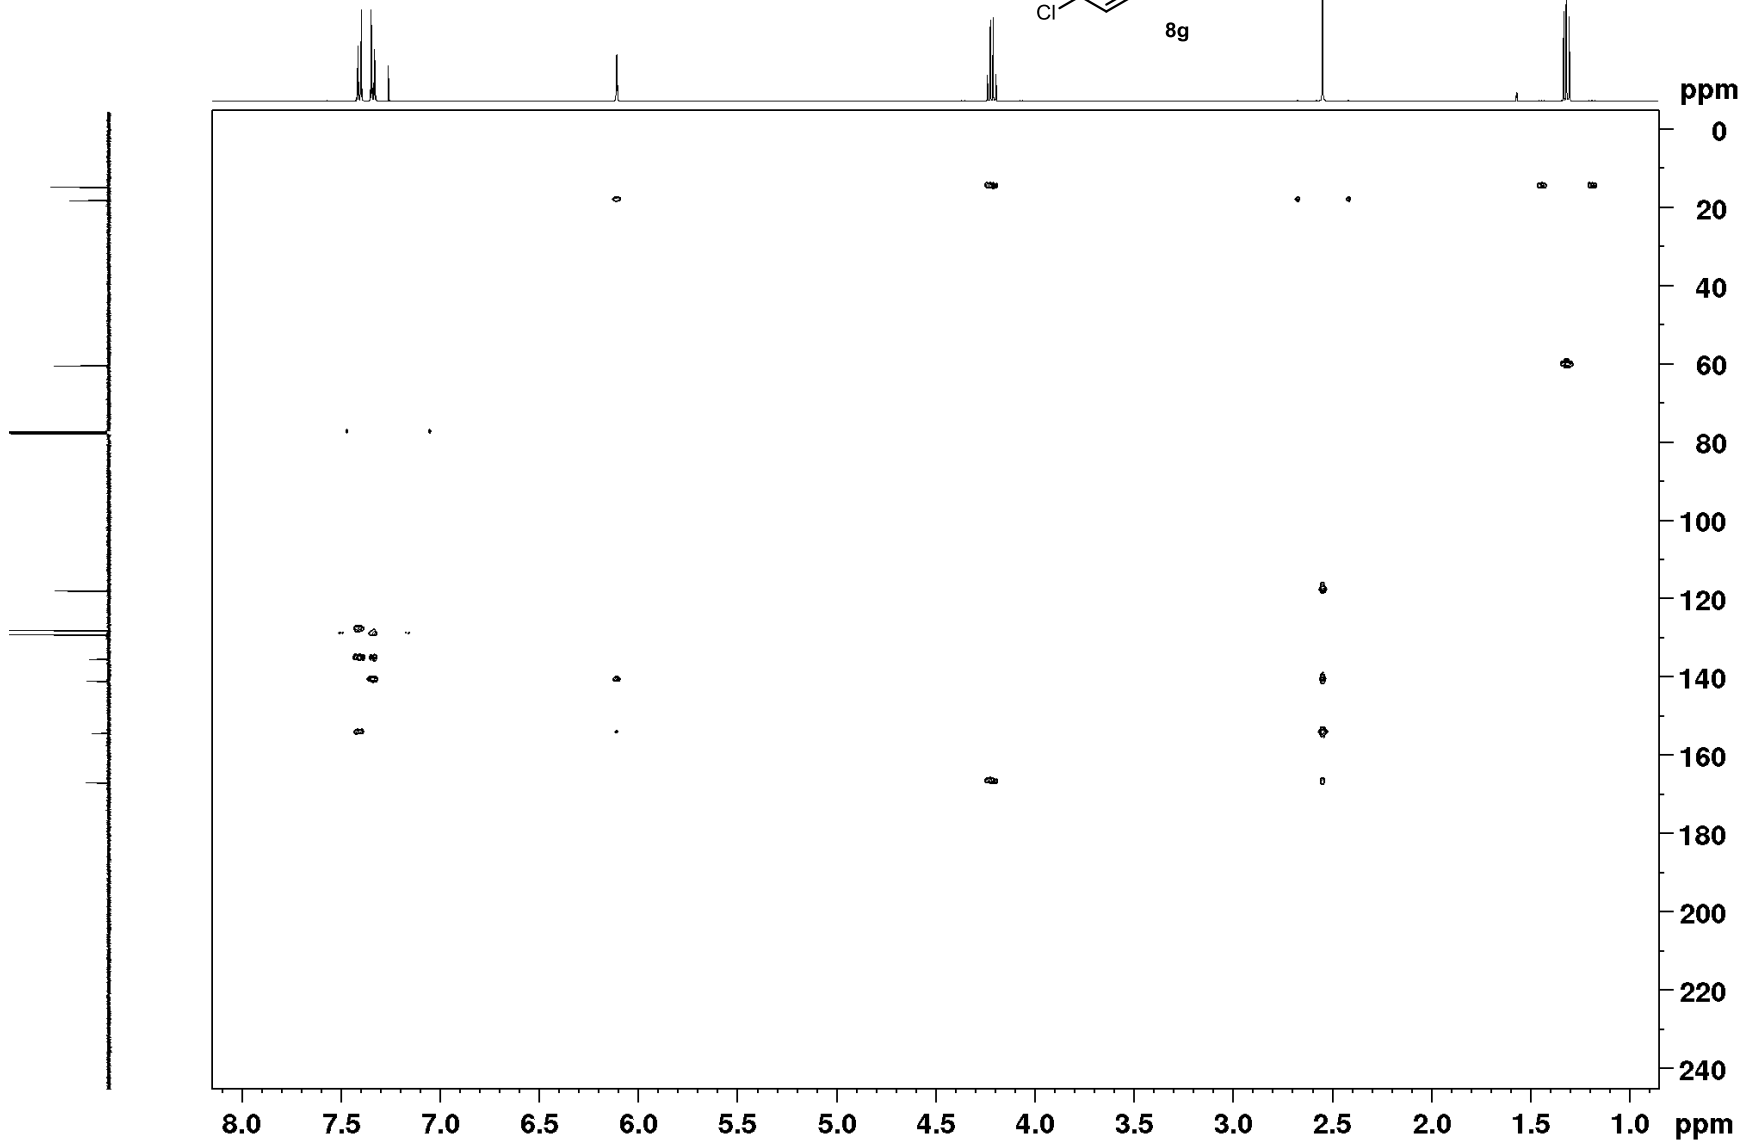

$^1\text{H}$ - $^1\text{H}$  NOESY

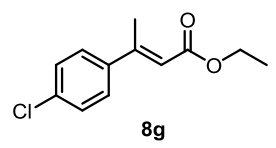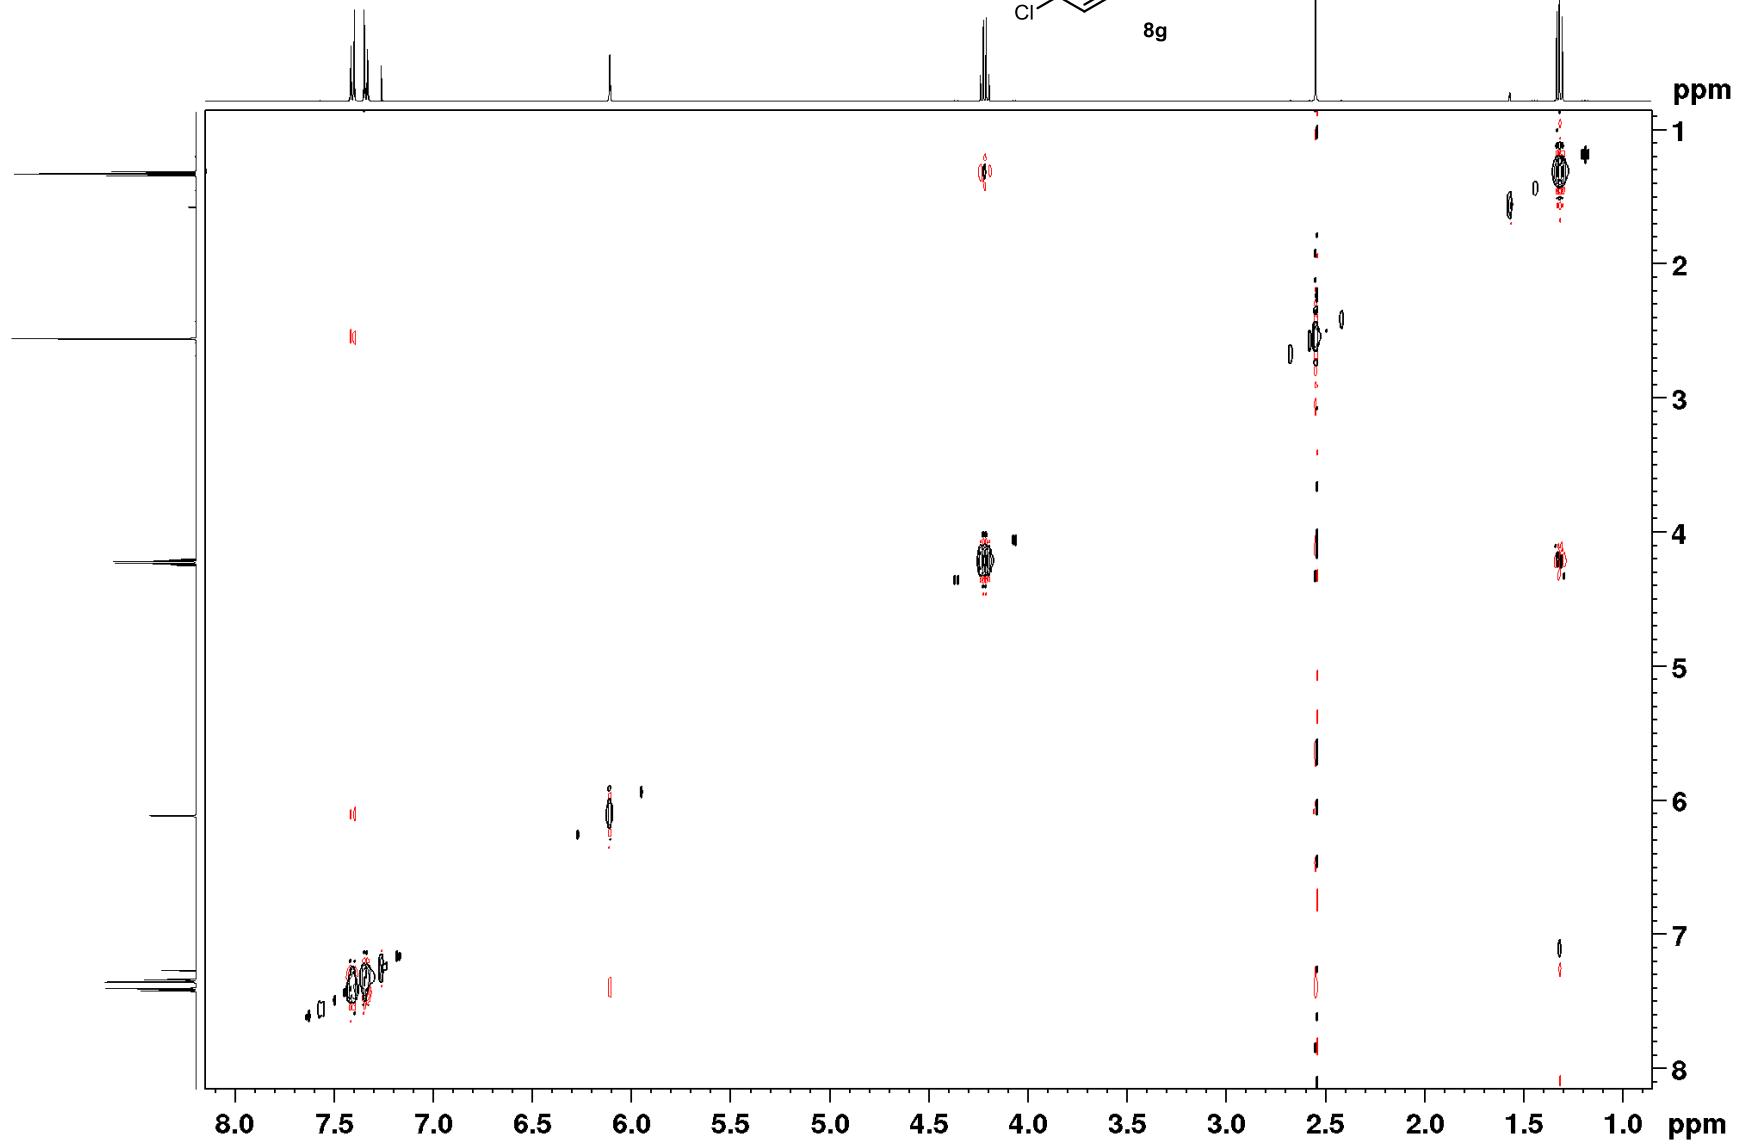

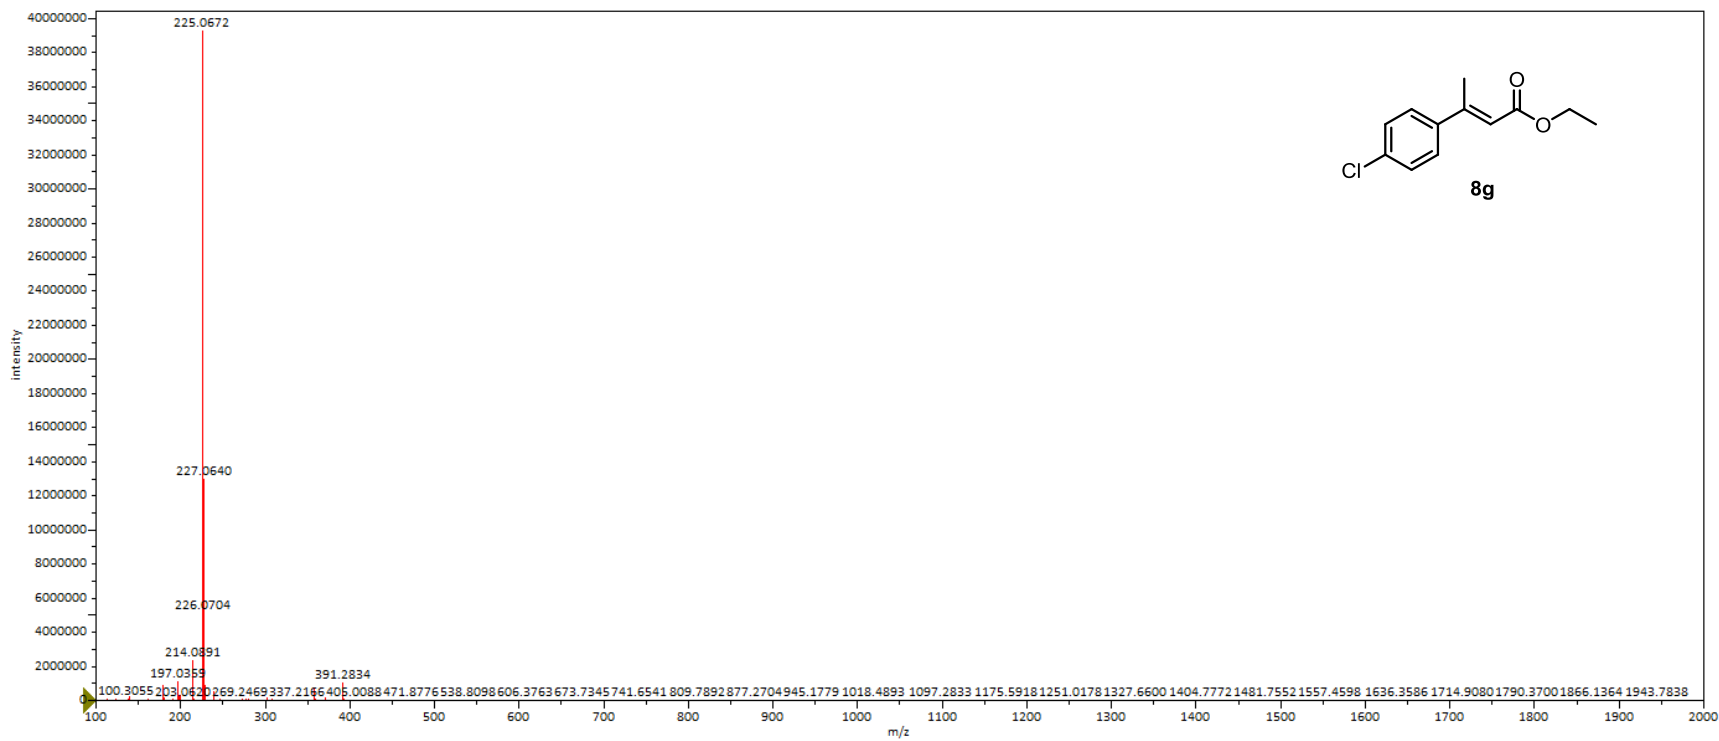



Ethyl (*E*)-3-(*o*-tolyl)but-2-enoate (8h)

<sup>1</sup>H NMR

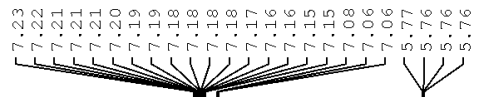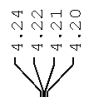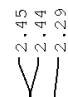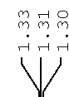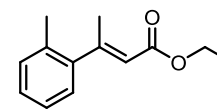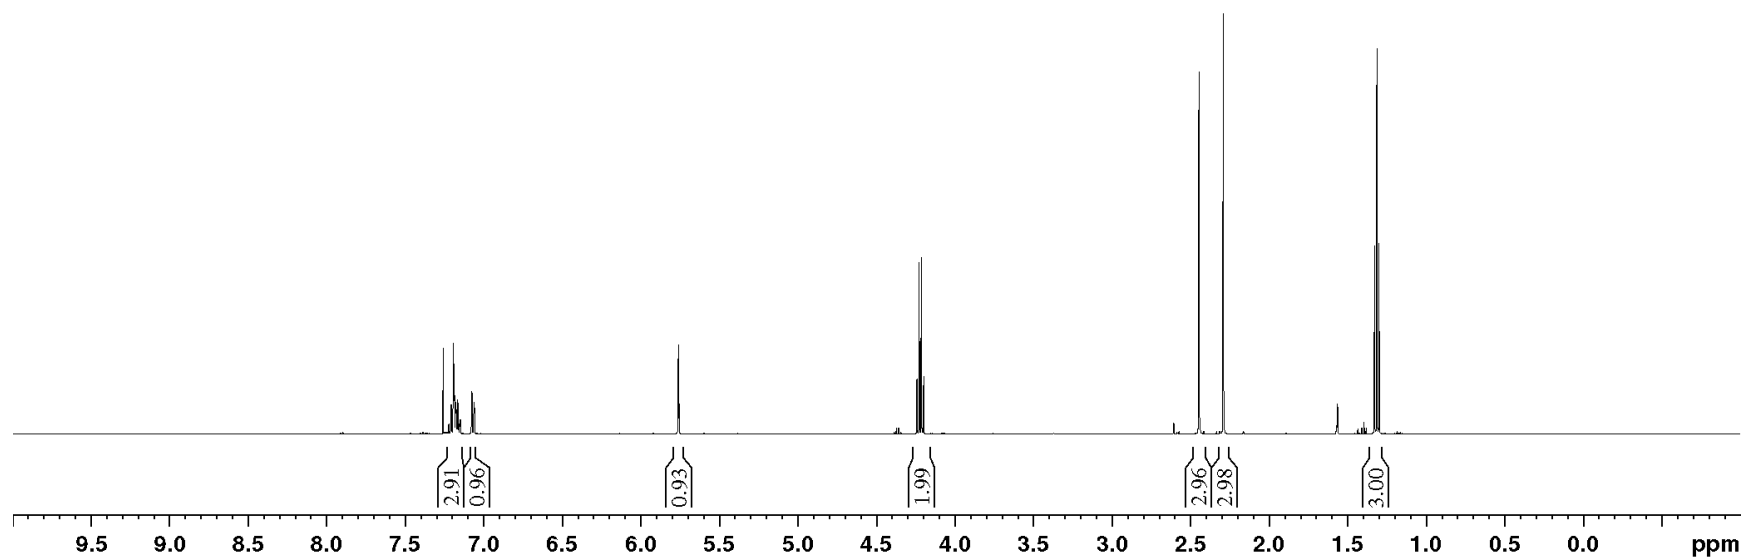

<sup>13</sup>C NMR

166.8

156.4

144.1

134.0

130.5

127.8

127.2

125.9

119.6

60.0

20.9

19.8

14.5

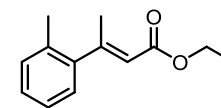

8h

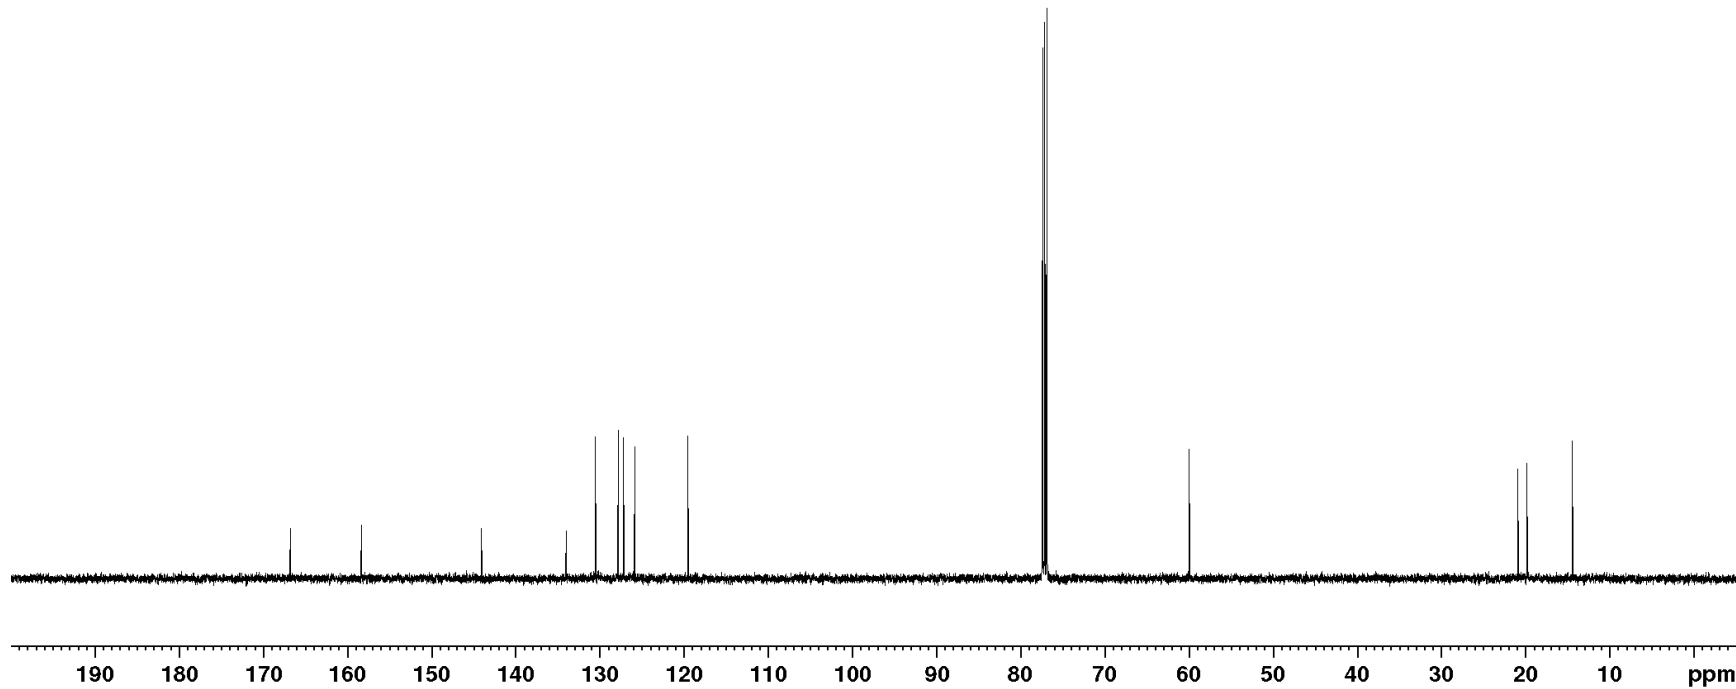

$^1\text{H}$ - $^1\text{H}$  COSY

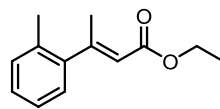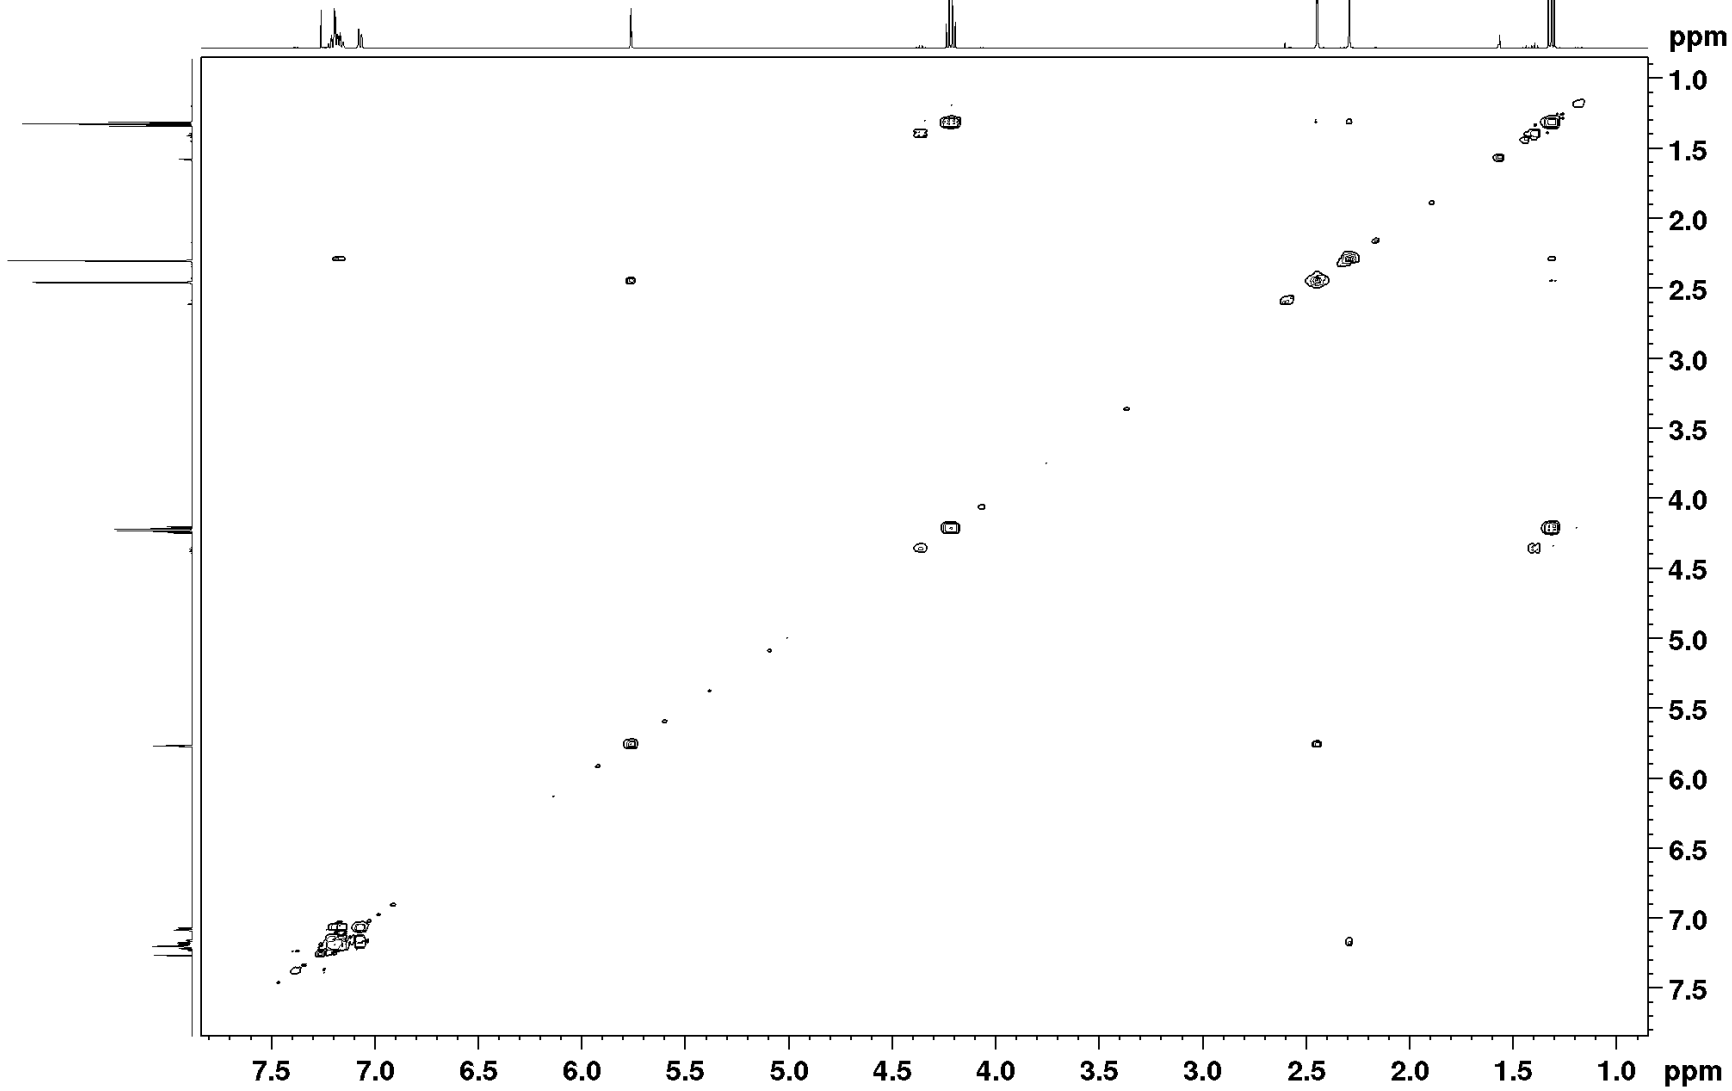

$^1\text{H}$ - $^{13}\text{C}$  HSQC

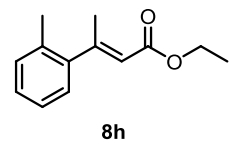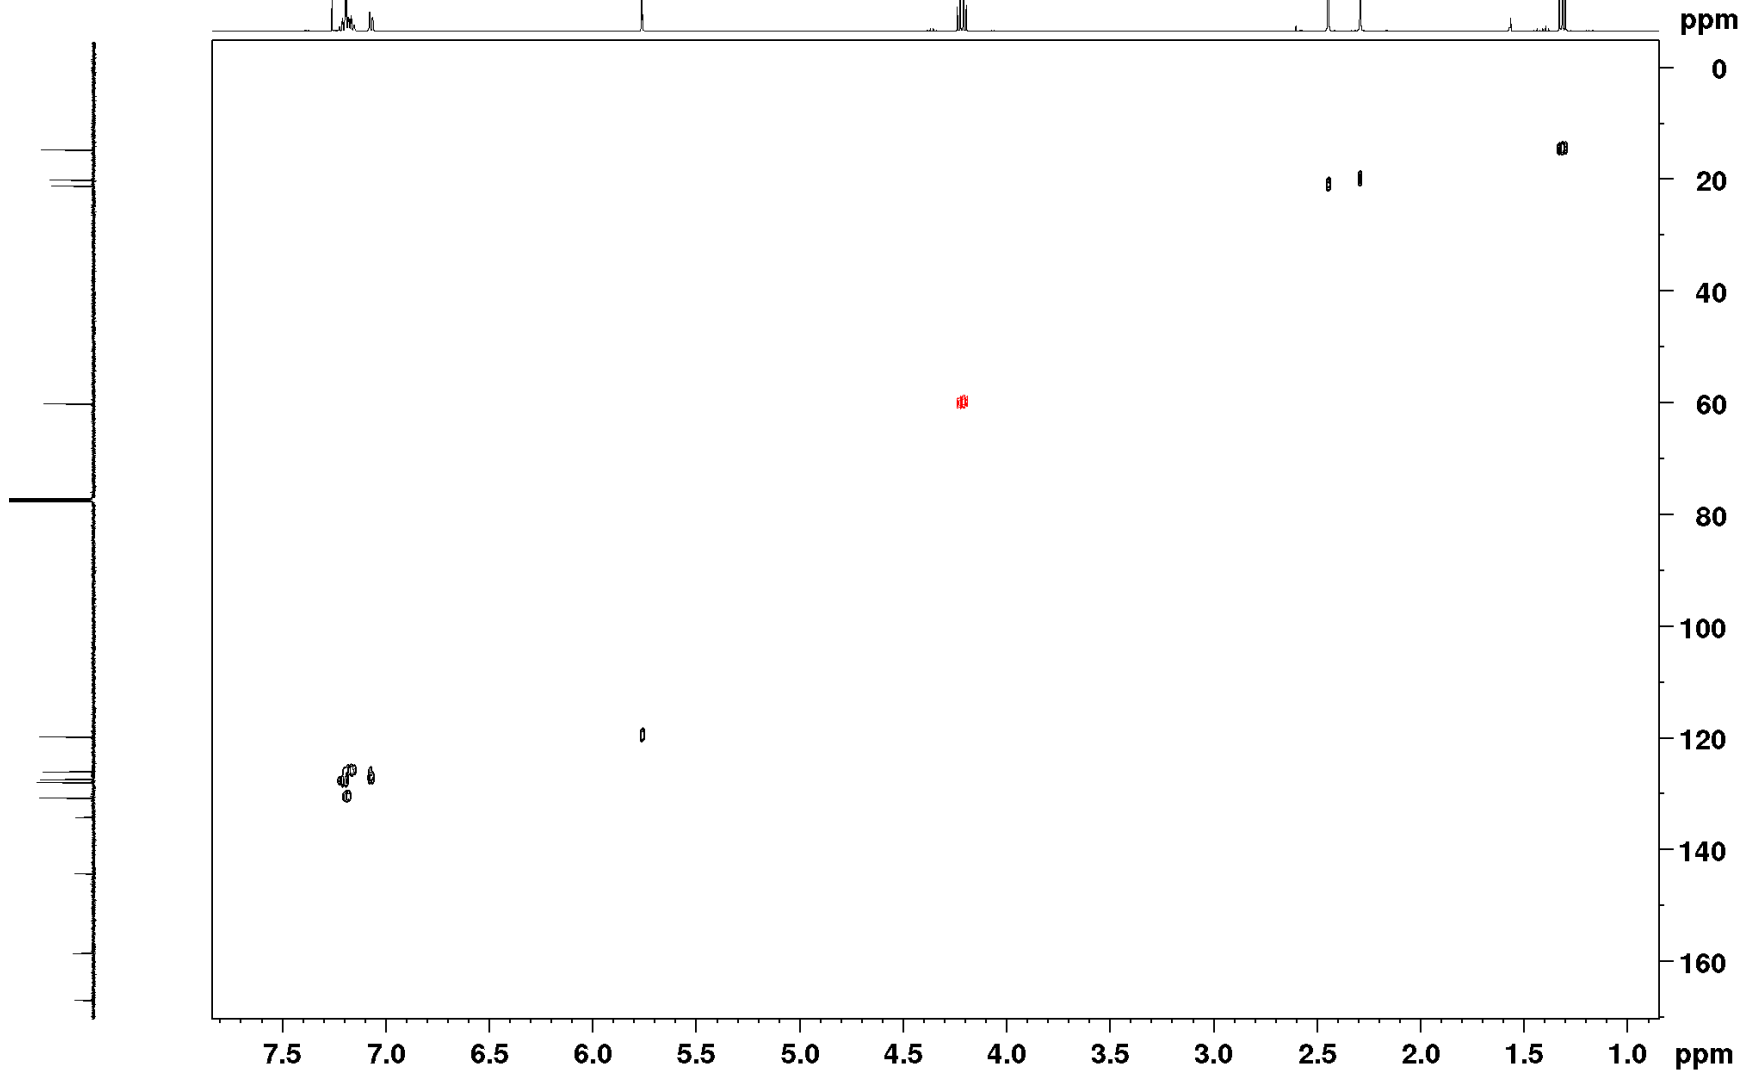

S400

$^1\text{H}$ - $^{13}\text{C}$  HMBC

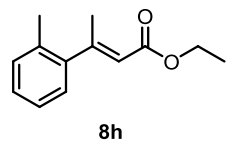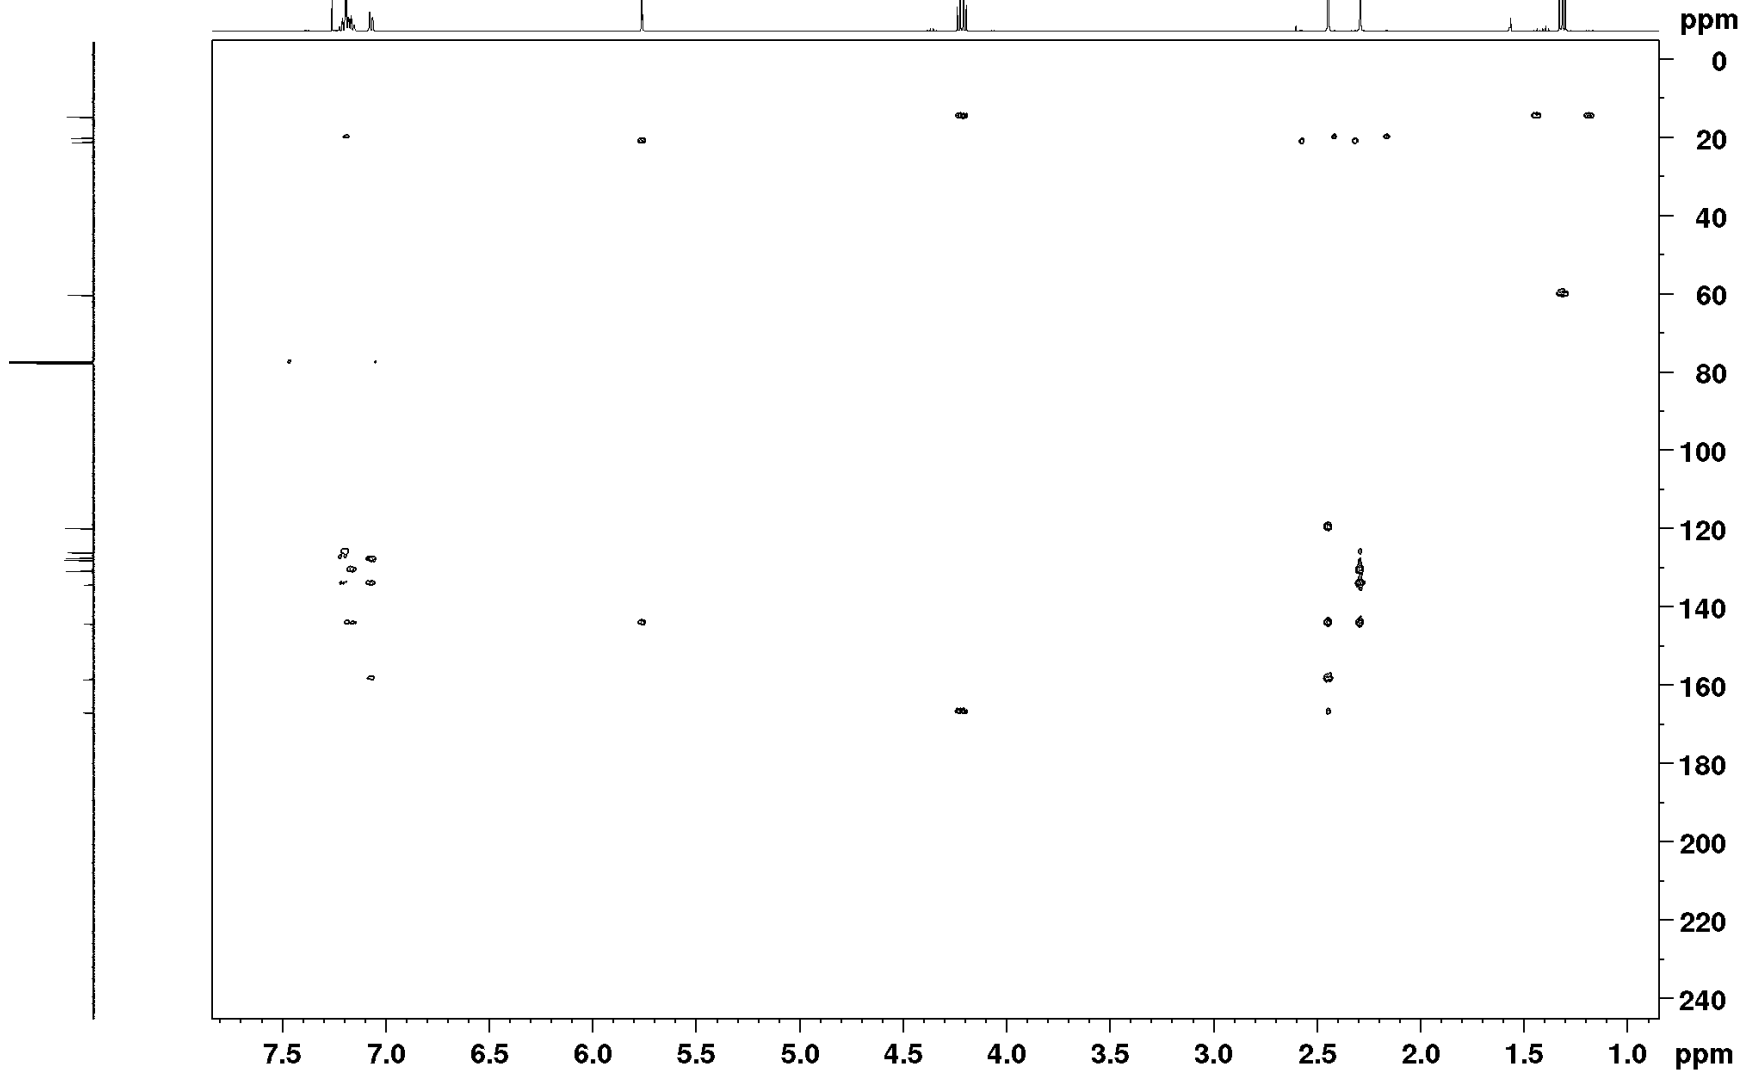

$^1\text{H}$ - $^1\text{H}$  NOESY

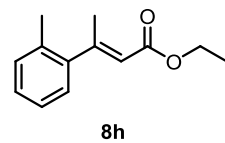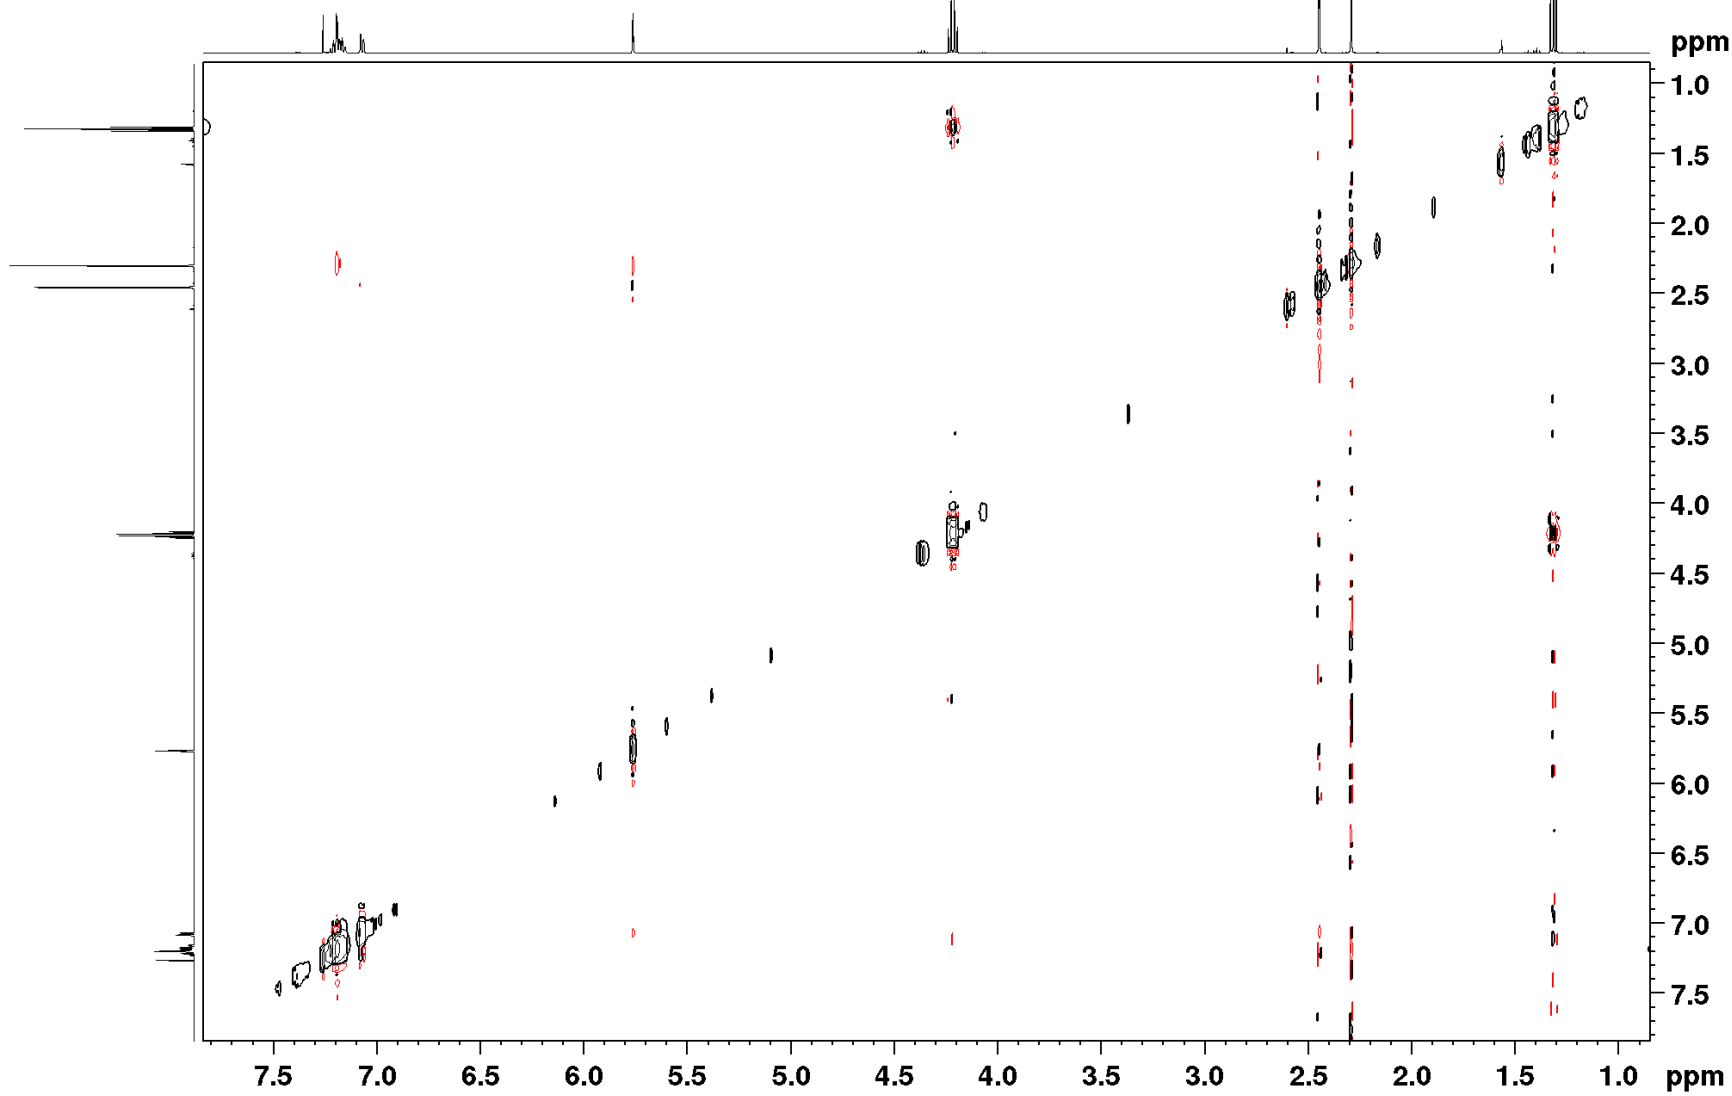

S402

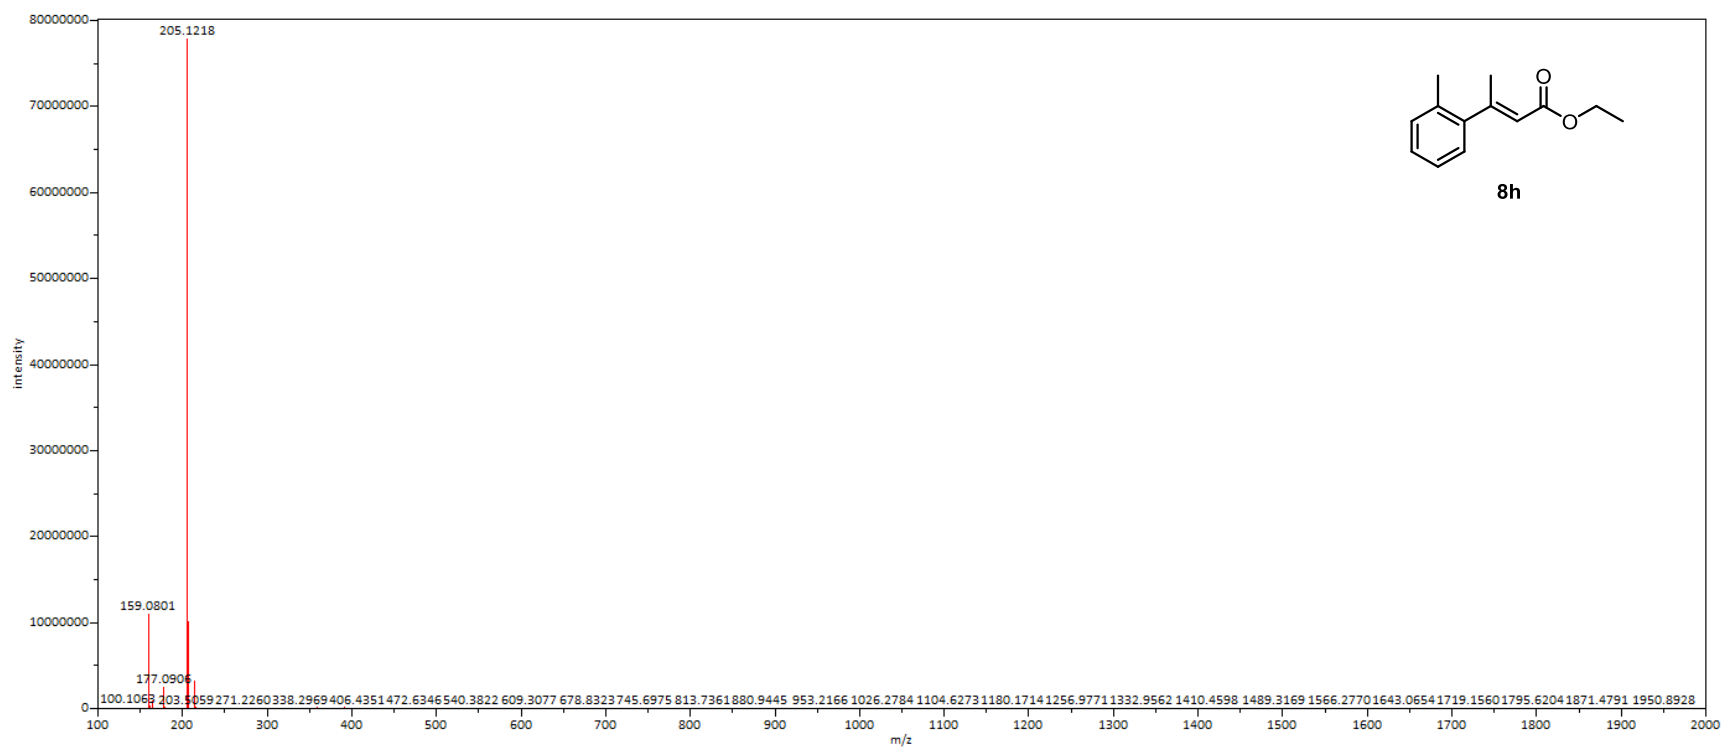

**Ethyl (*E*)-3-(4-nitrophenyl)but-2-enoate (8i)**

<sup>1</sup>H NMR

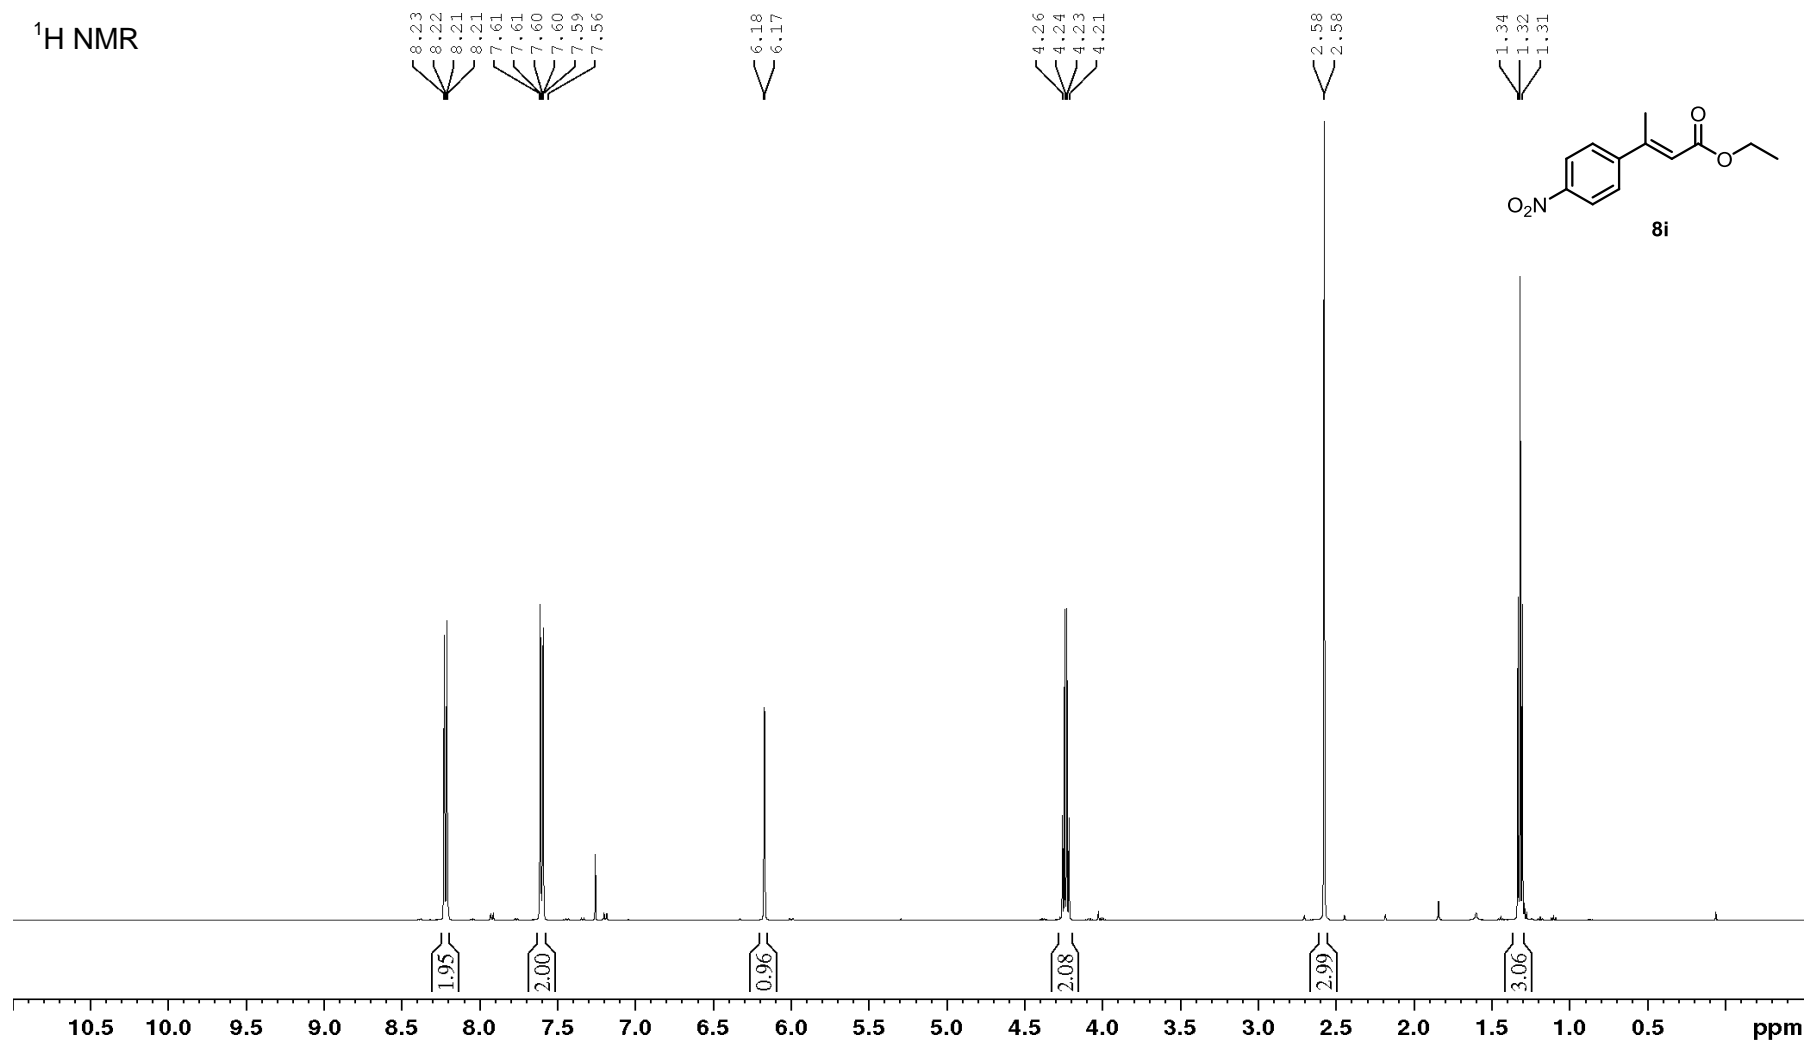



<sup>13</sup>C NMR

166.2

152.8

148.7

148.1

127.4

123.9

120.3

60.4

18.0

14.4

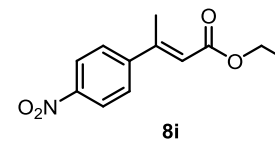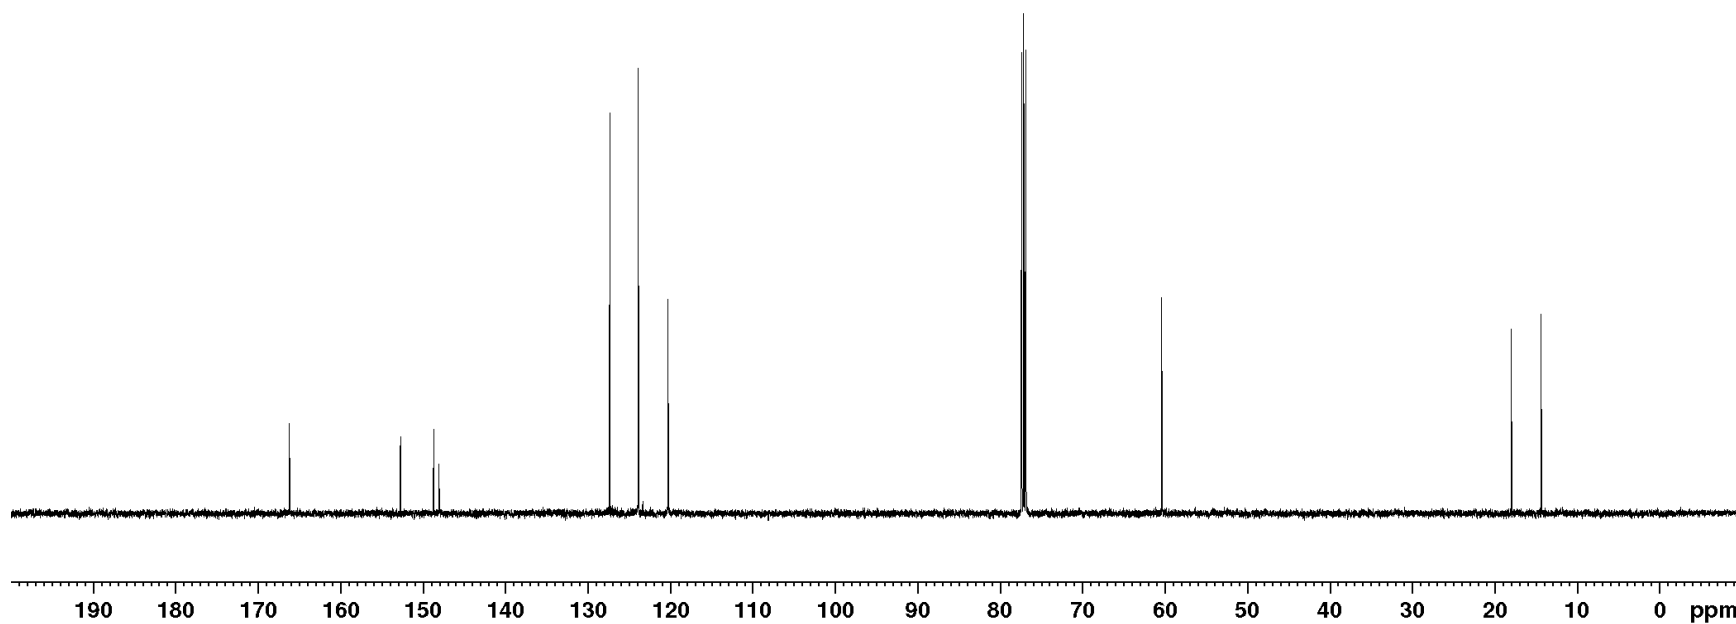

<sup>13</sup>C DEPT

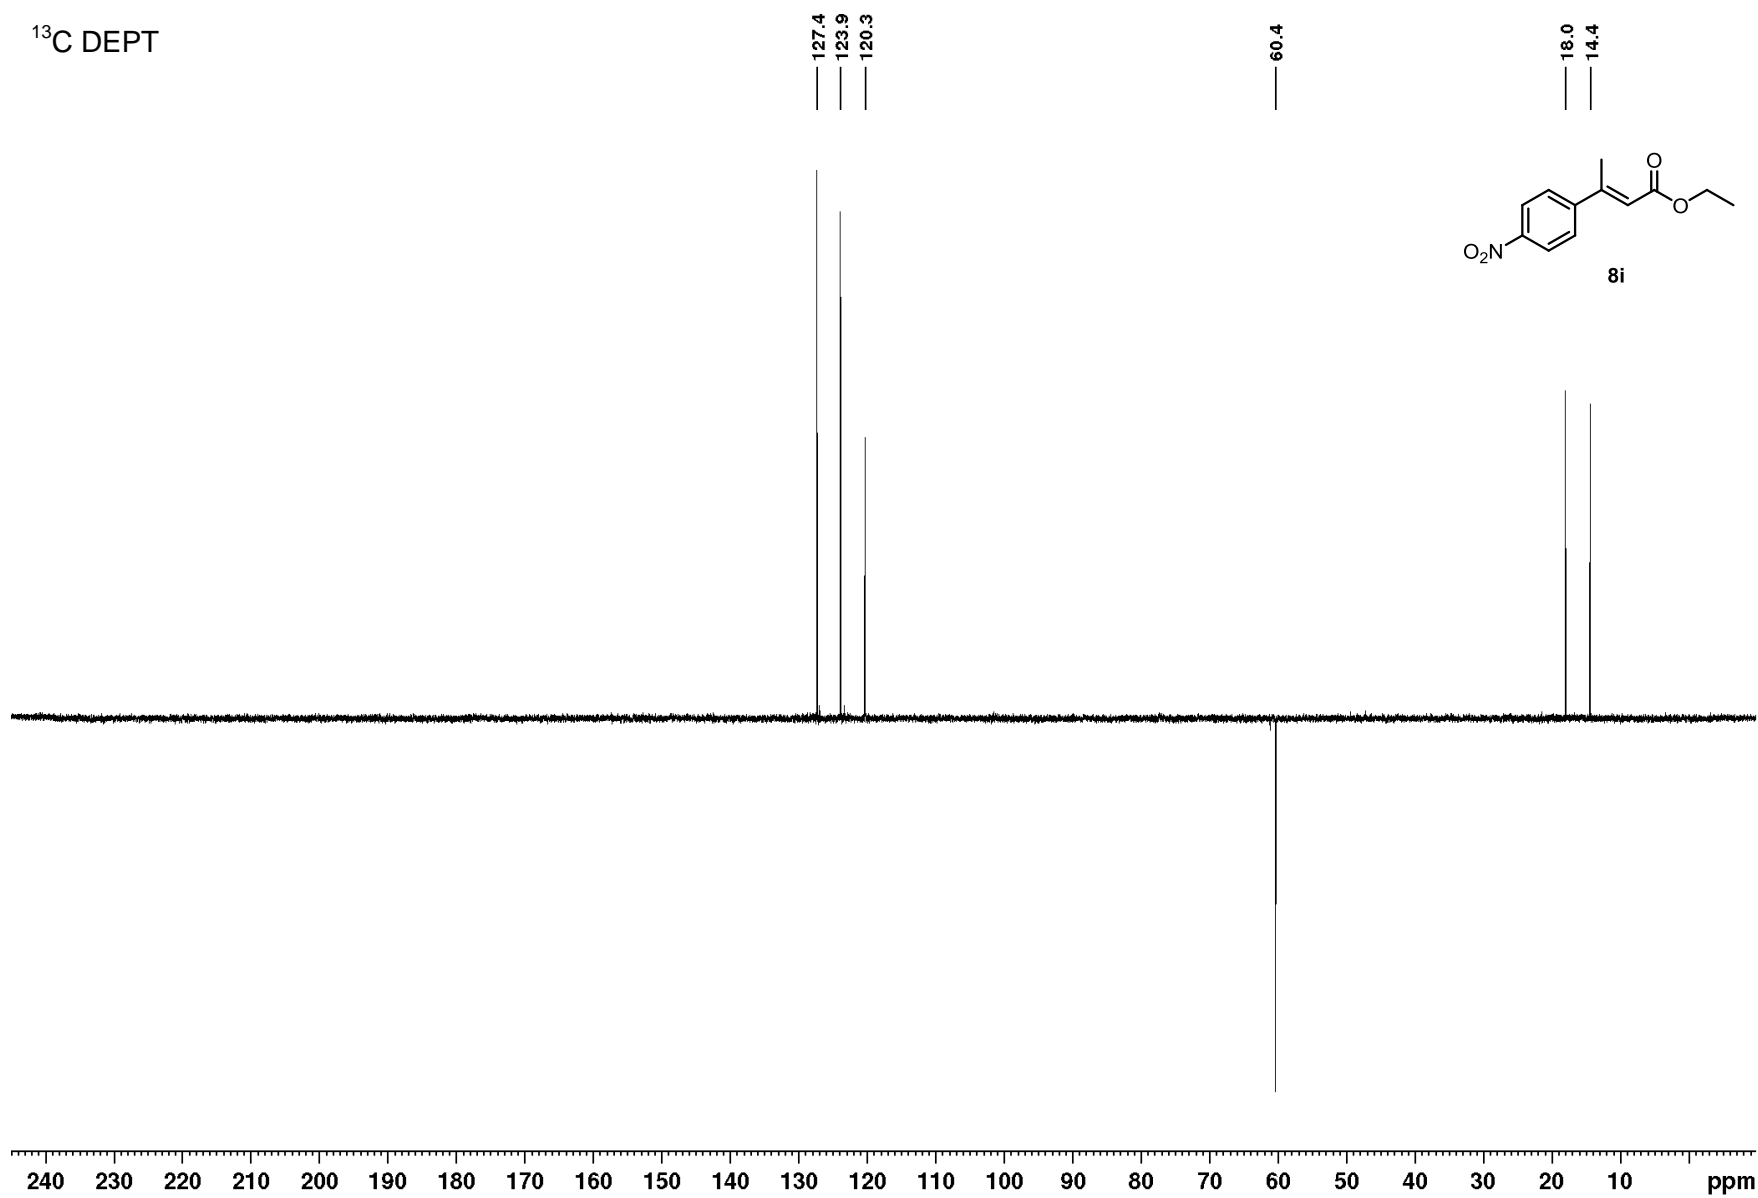

$^1\text{H}$ - $^1\text{H}$  COSY

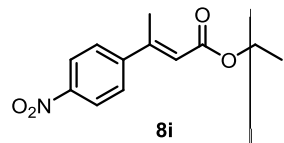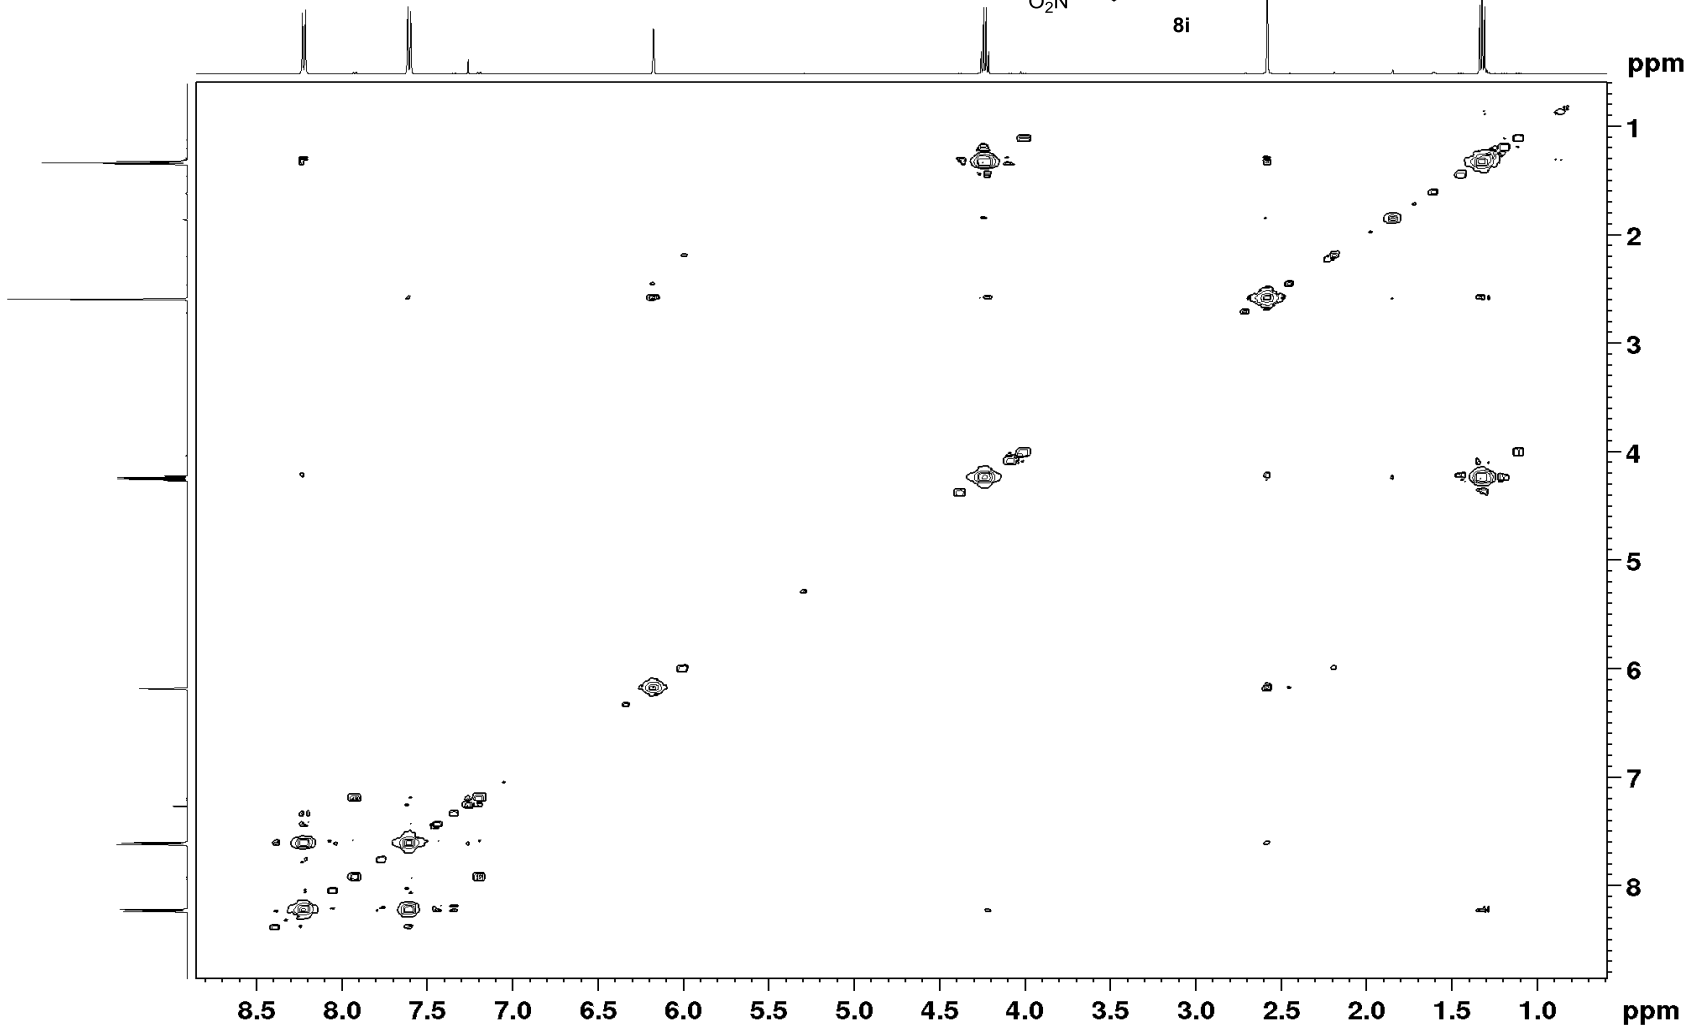

$^1\text{H}$ - $^{13}\text{C}$  HMQC

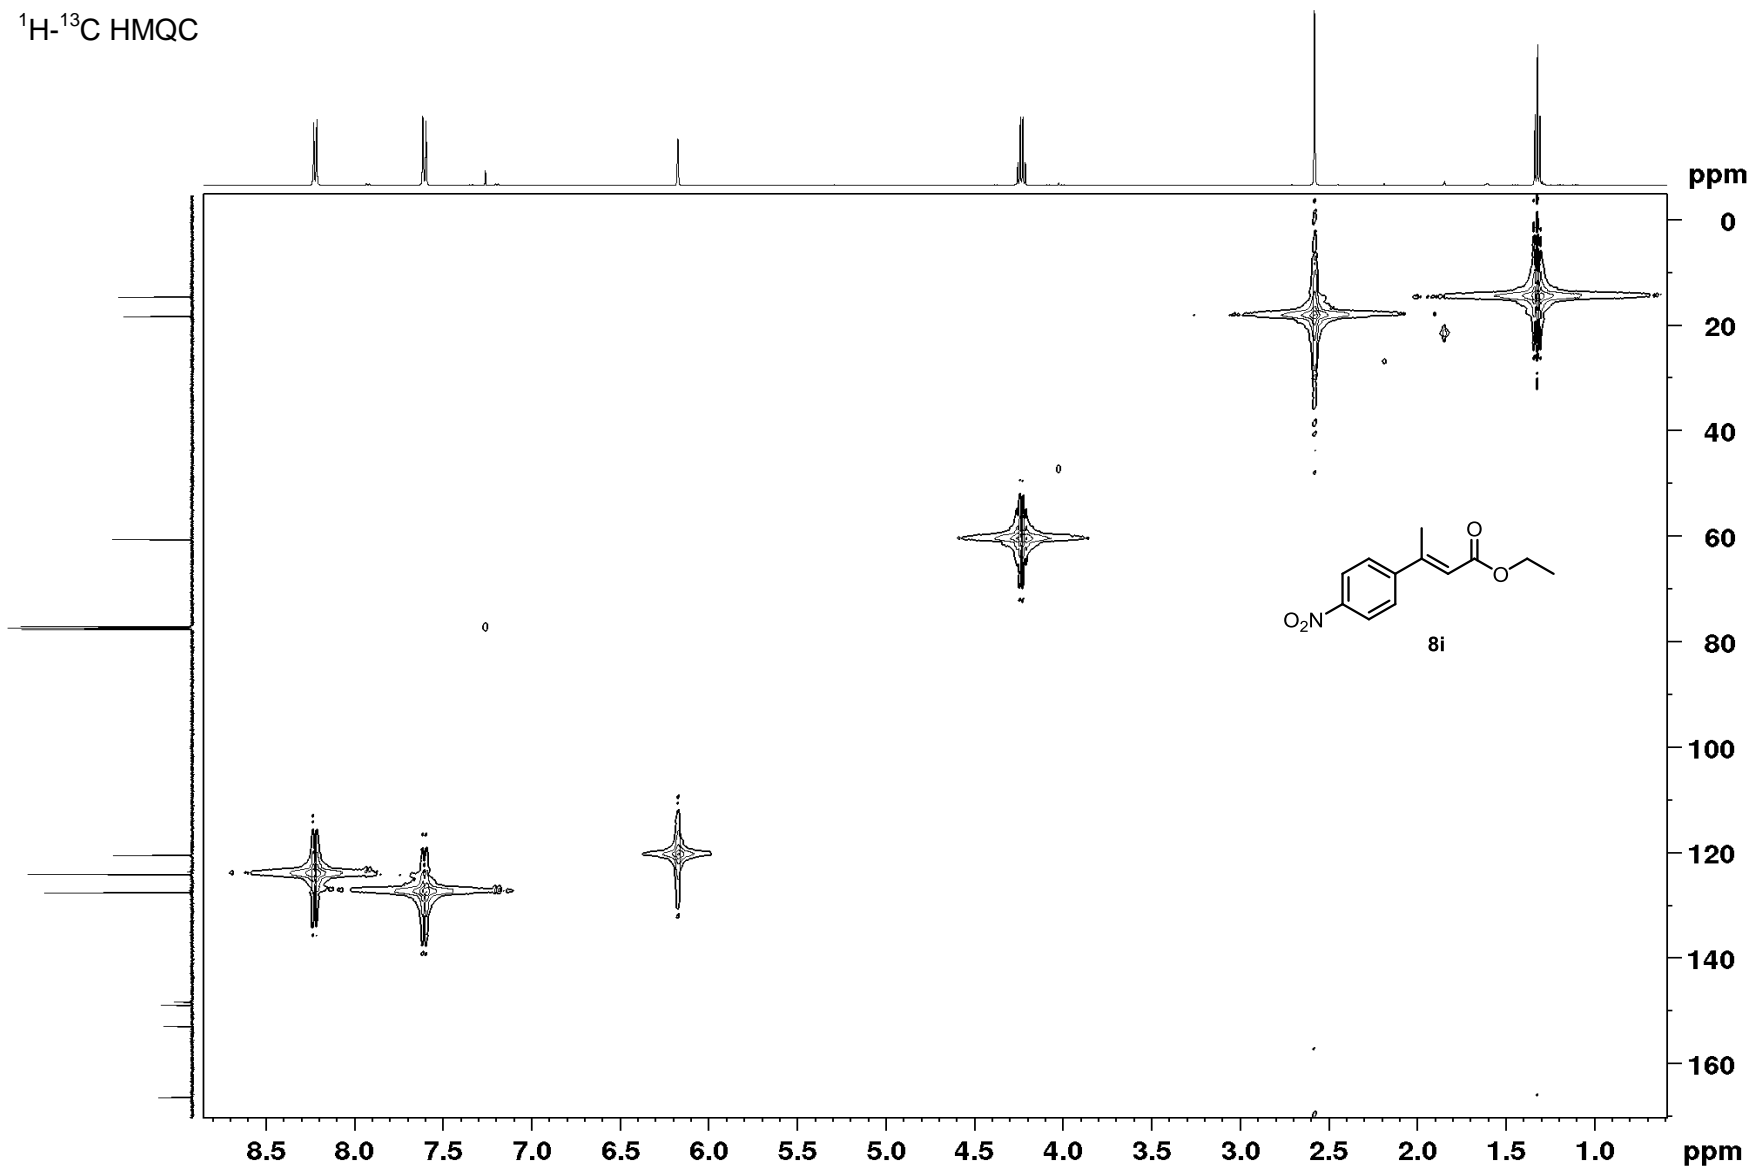

$^1\text{H}$ - $^{13}\text{C}$  HMBC

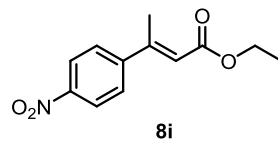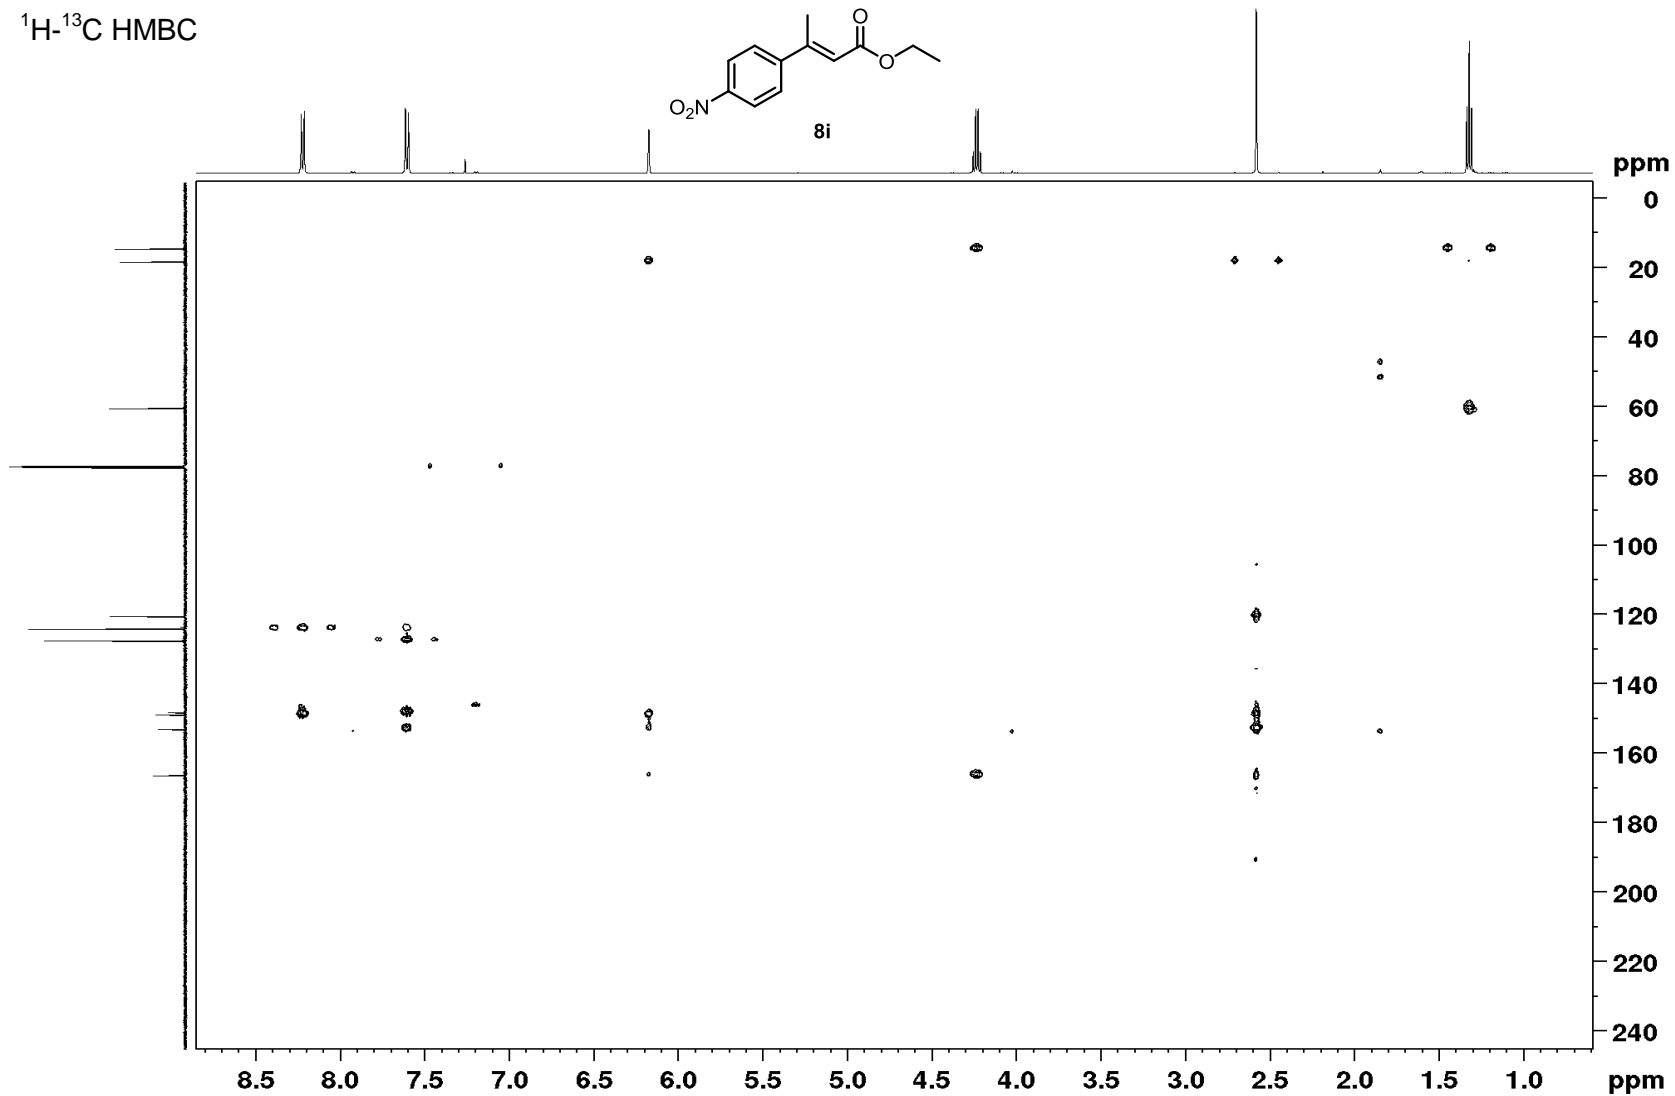

$^1\text{H}$ - $^1\text{H}$  NOESY

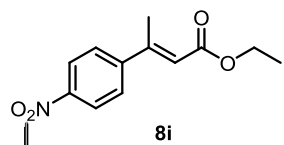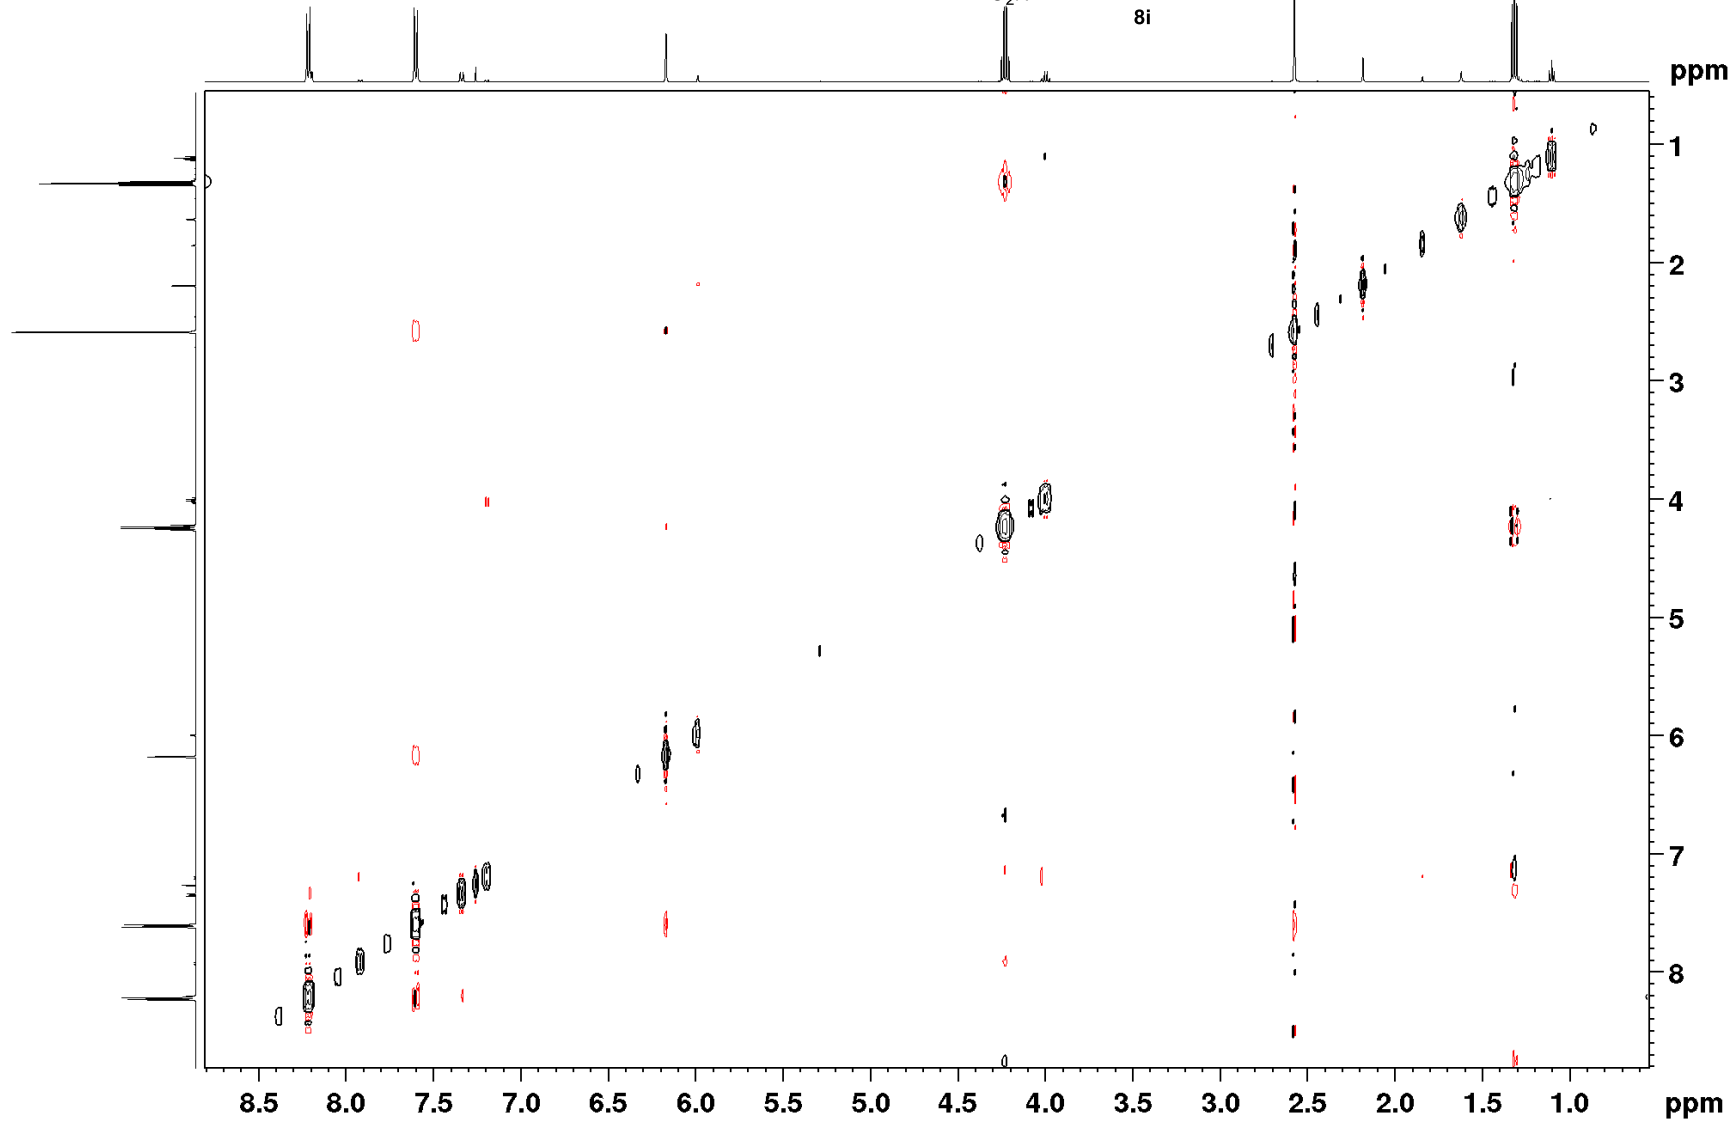

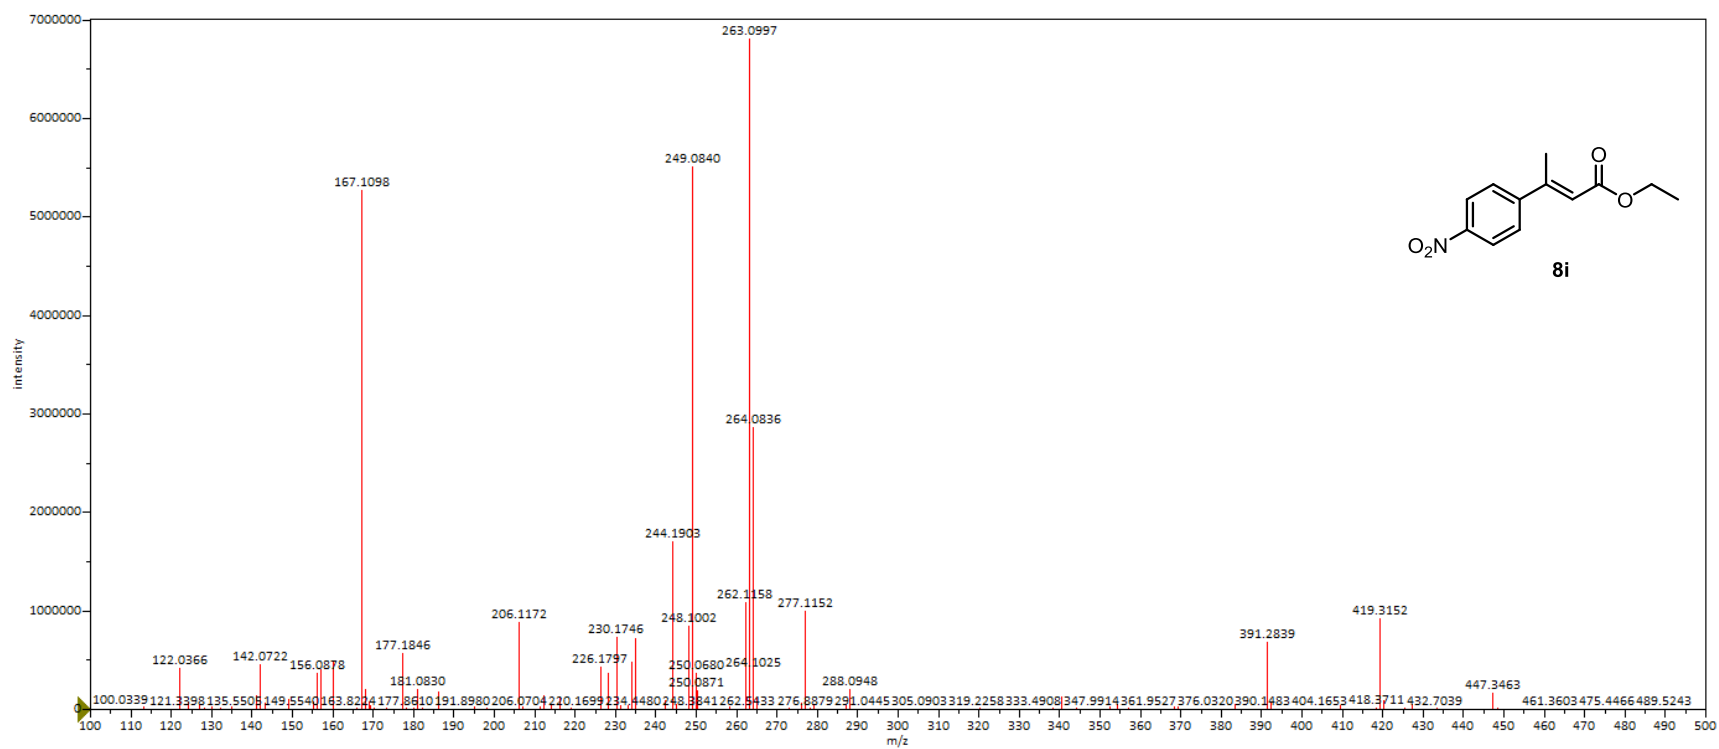

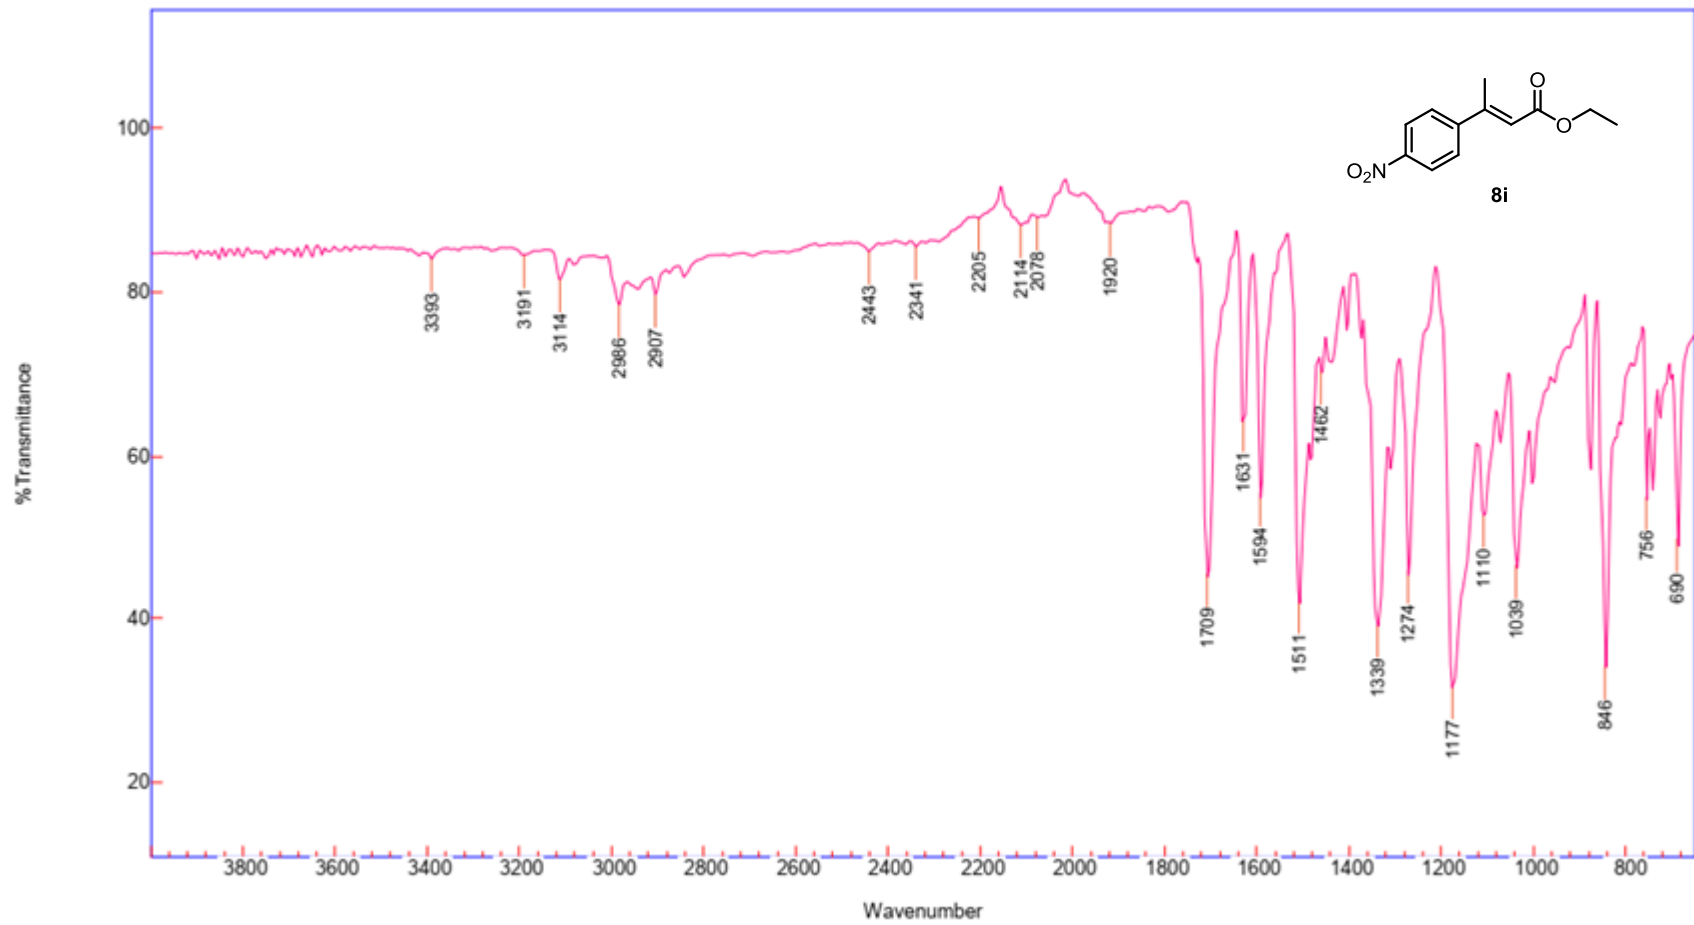



Ethyl (*E*)-3-(4-cyanophenyl)but-2-enoate (**8j**)

<sup>1</sup>H NMR

7.67  
7.67  
7.67  
7.66  
7.65  
7.65  
7.56  
7.56  
7.55  
7.54  
7.54  
7.54

6.14  
6.14  
6.14  
6.14

4.25  
4.23  
4.22  
4.20

2.56  
2.55

1.33  
1.32  
1.30

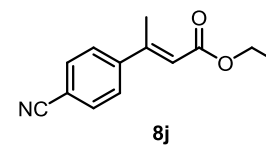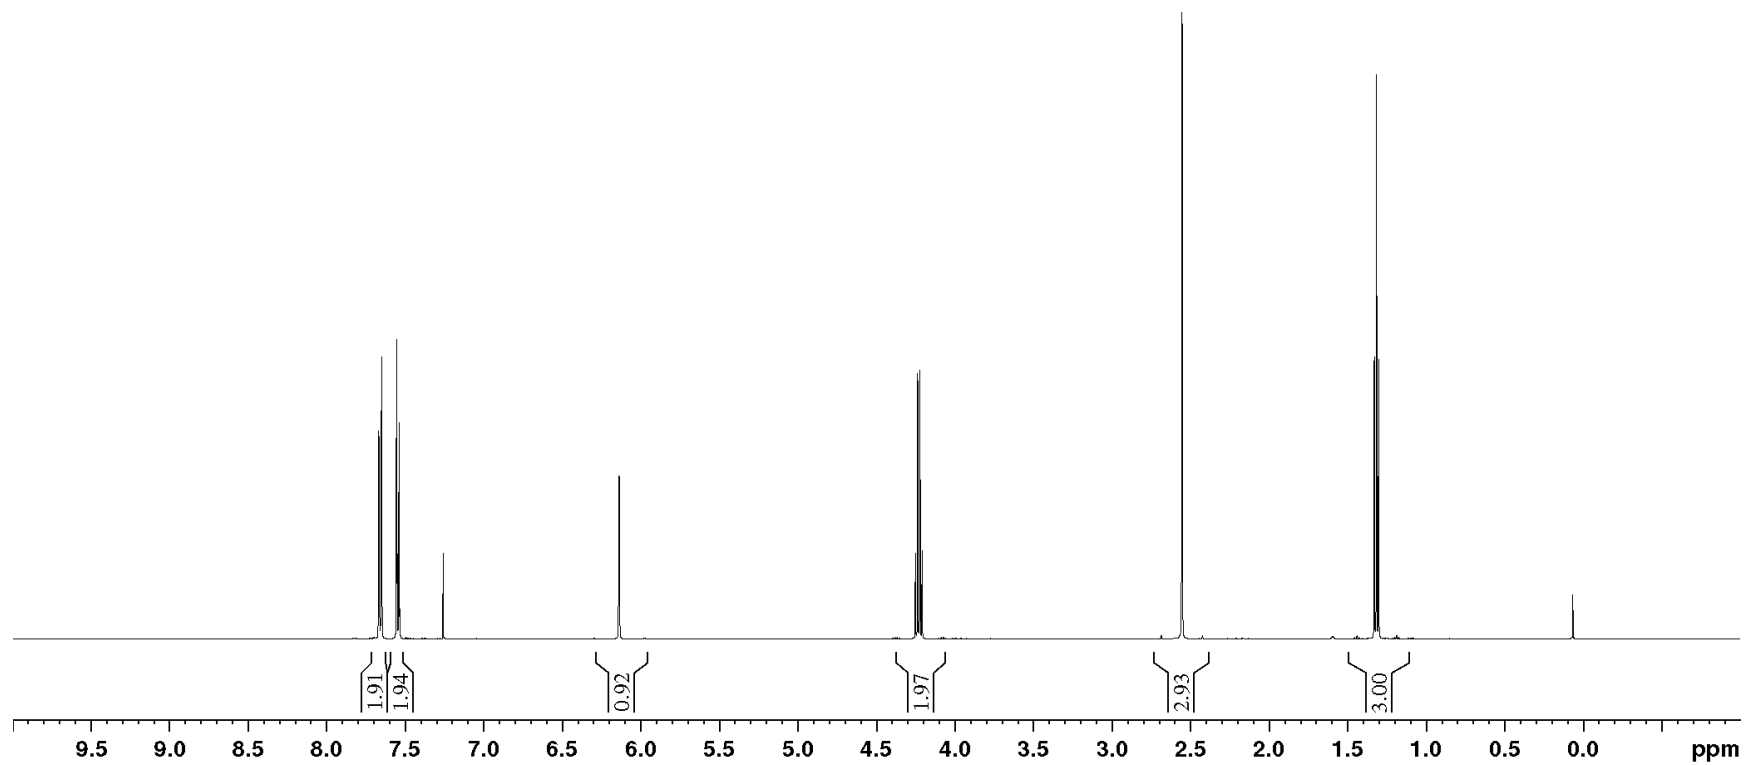

<sup>13</sup>C NMR

166.3

153.1

146.8

132.5

127.1

119.8

118.6

112.6

60.3

17.9

14.4

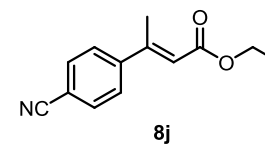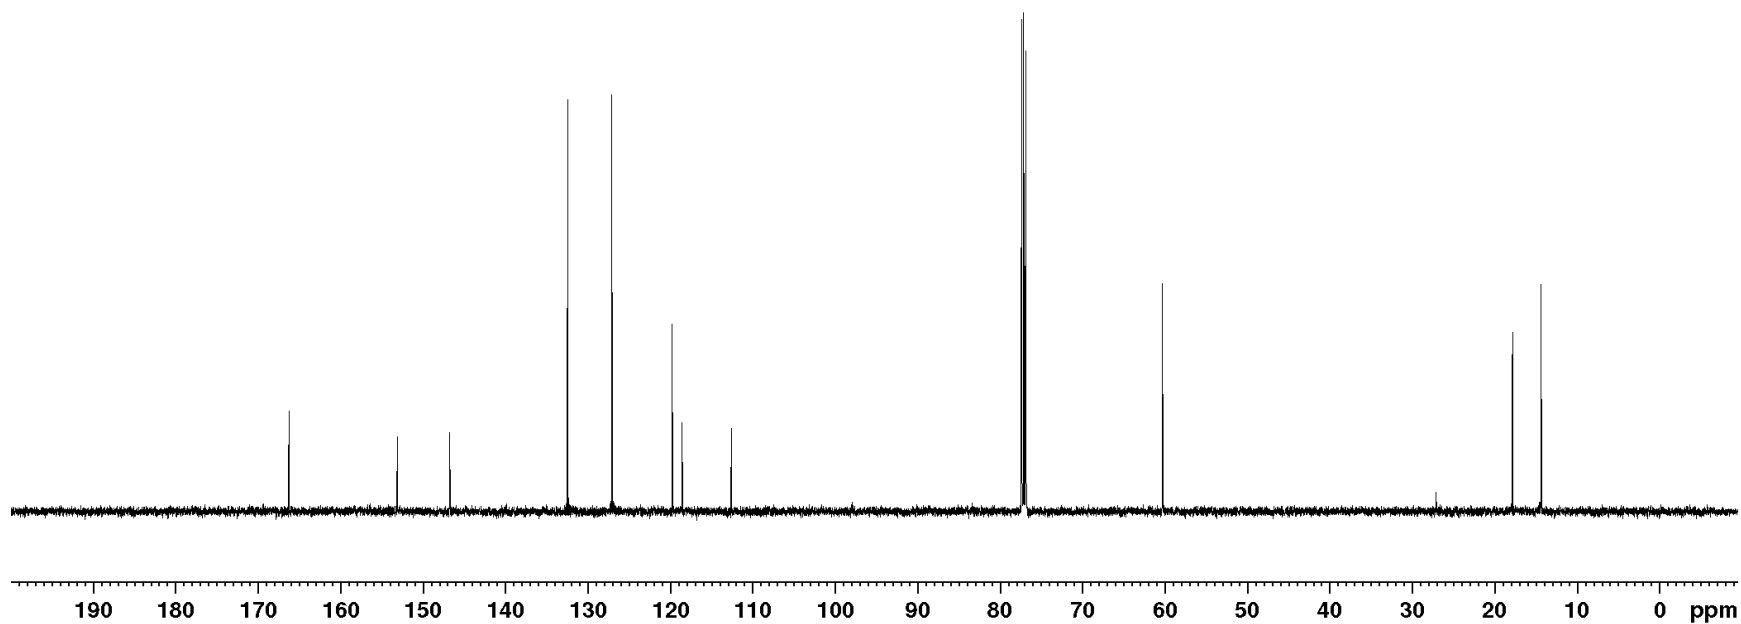

<sup>13</sup>C DEPT

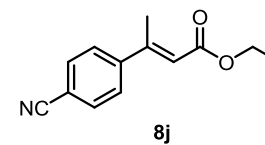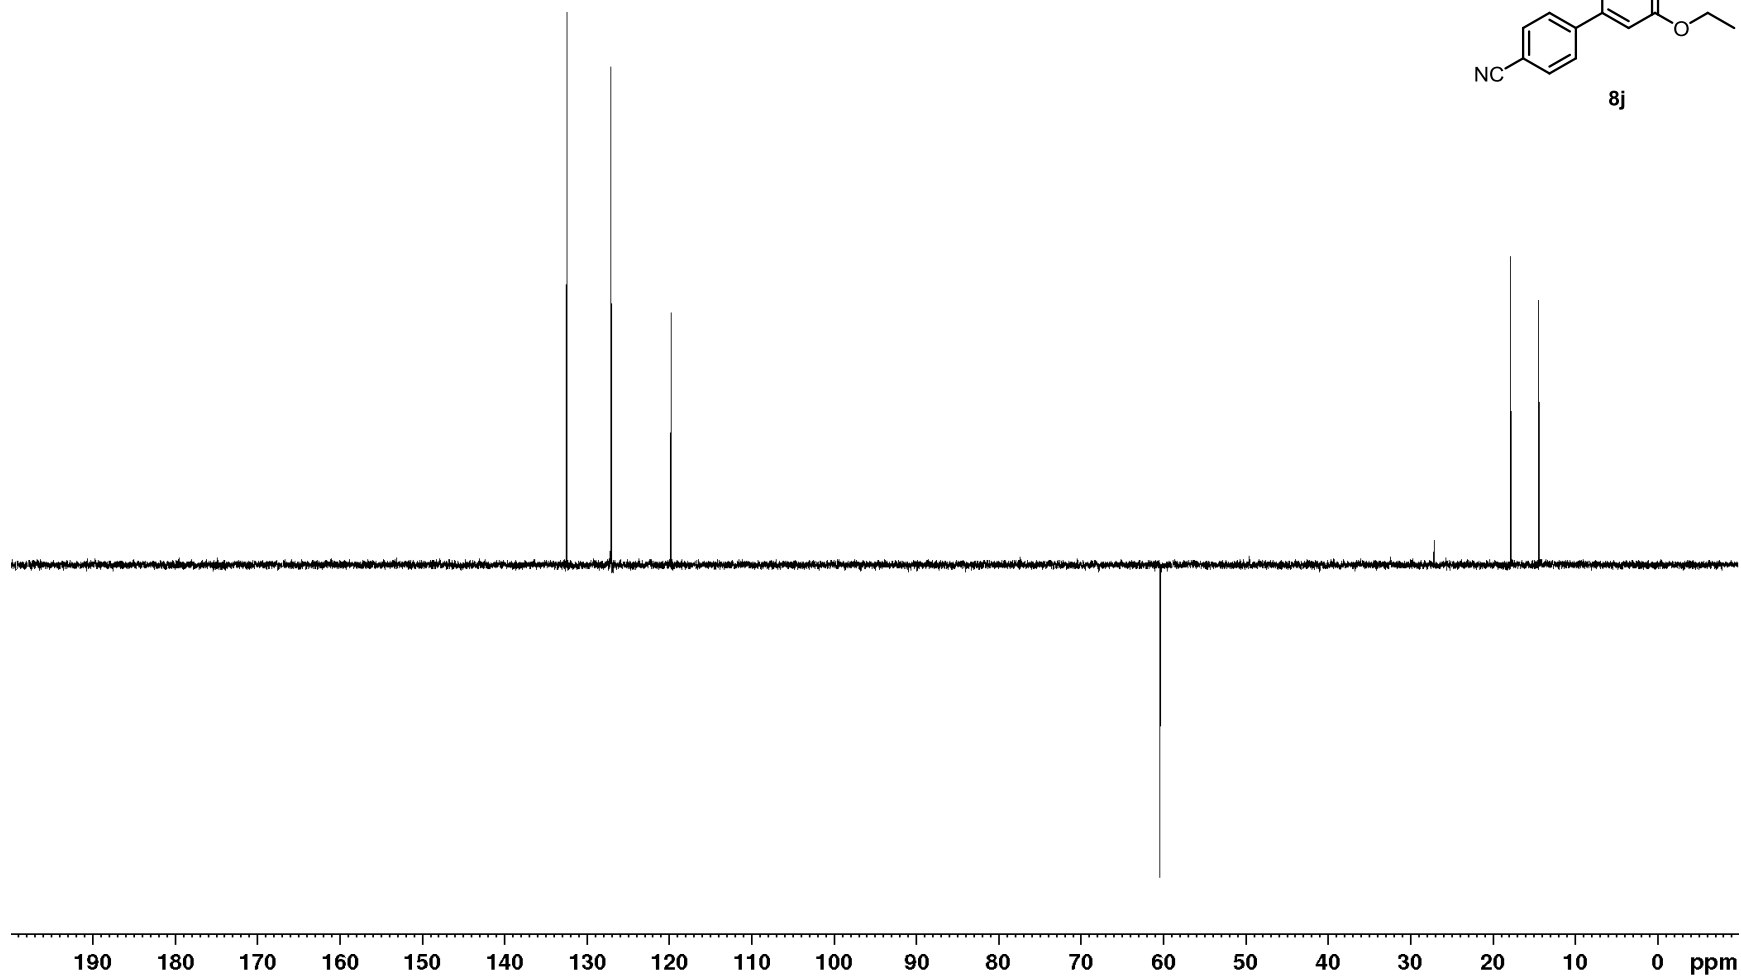

$^1\text{H}$ - $^1\text{H}$  COSY

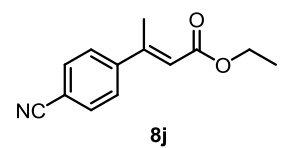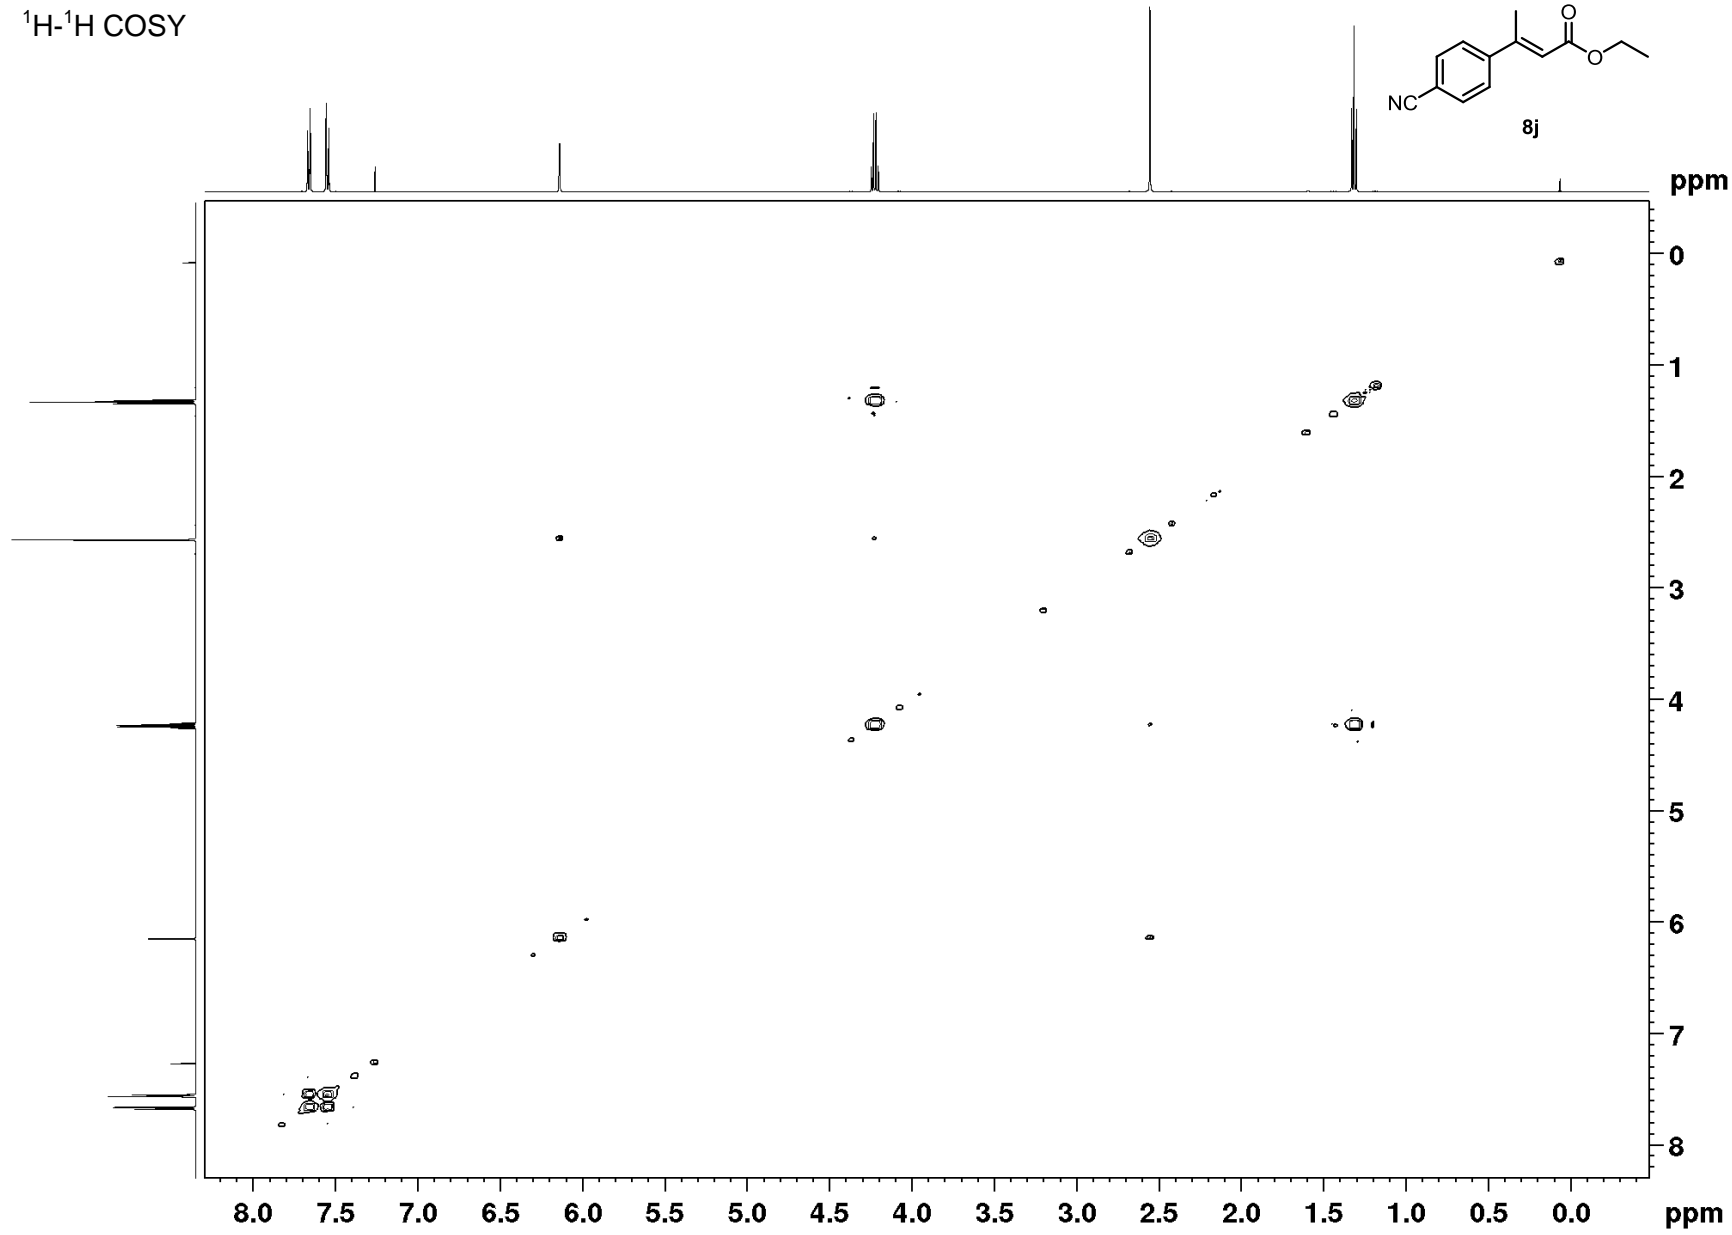

$^1\text{H}$ - $^{13}\text{C}$  HMQC

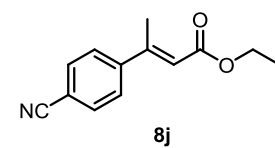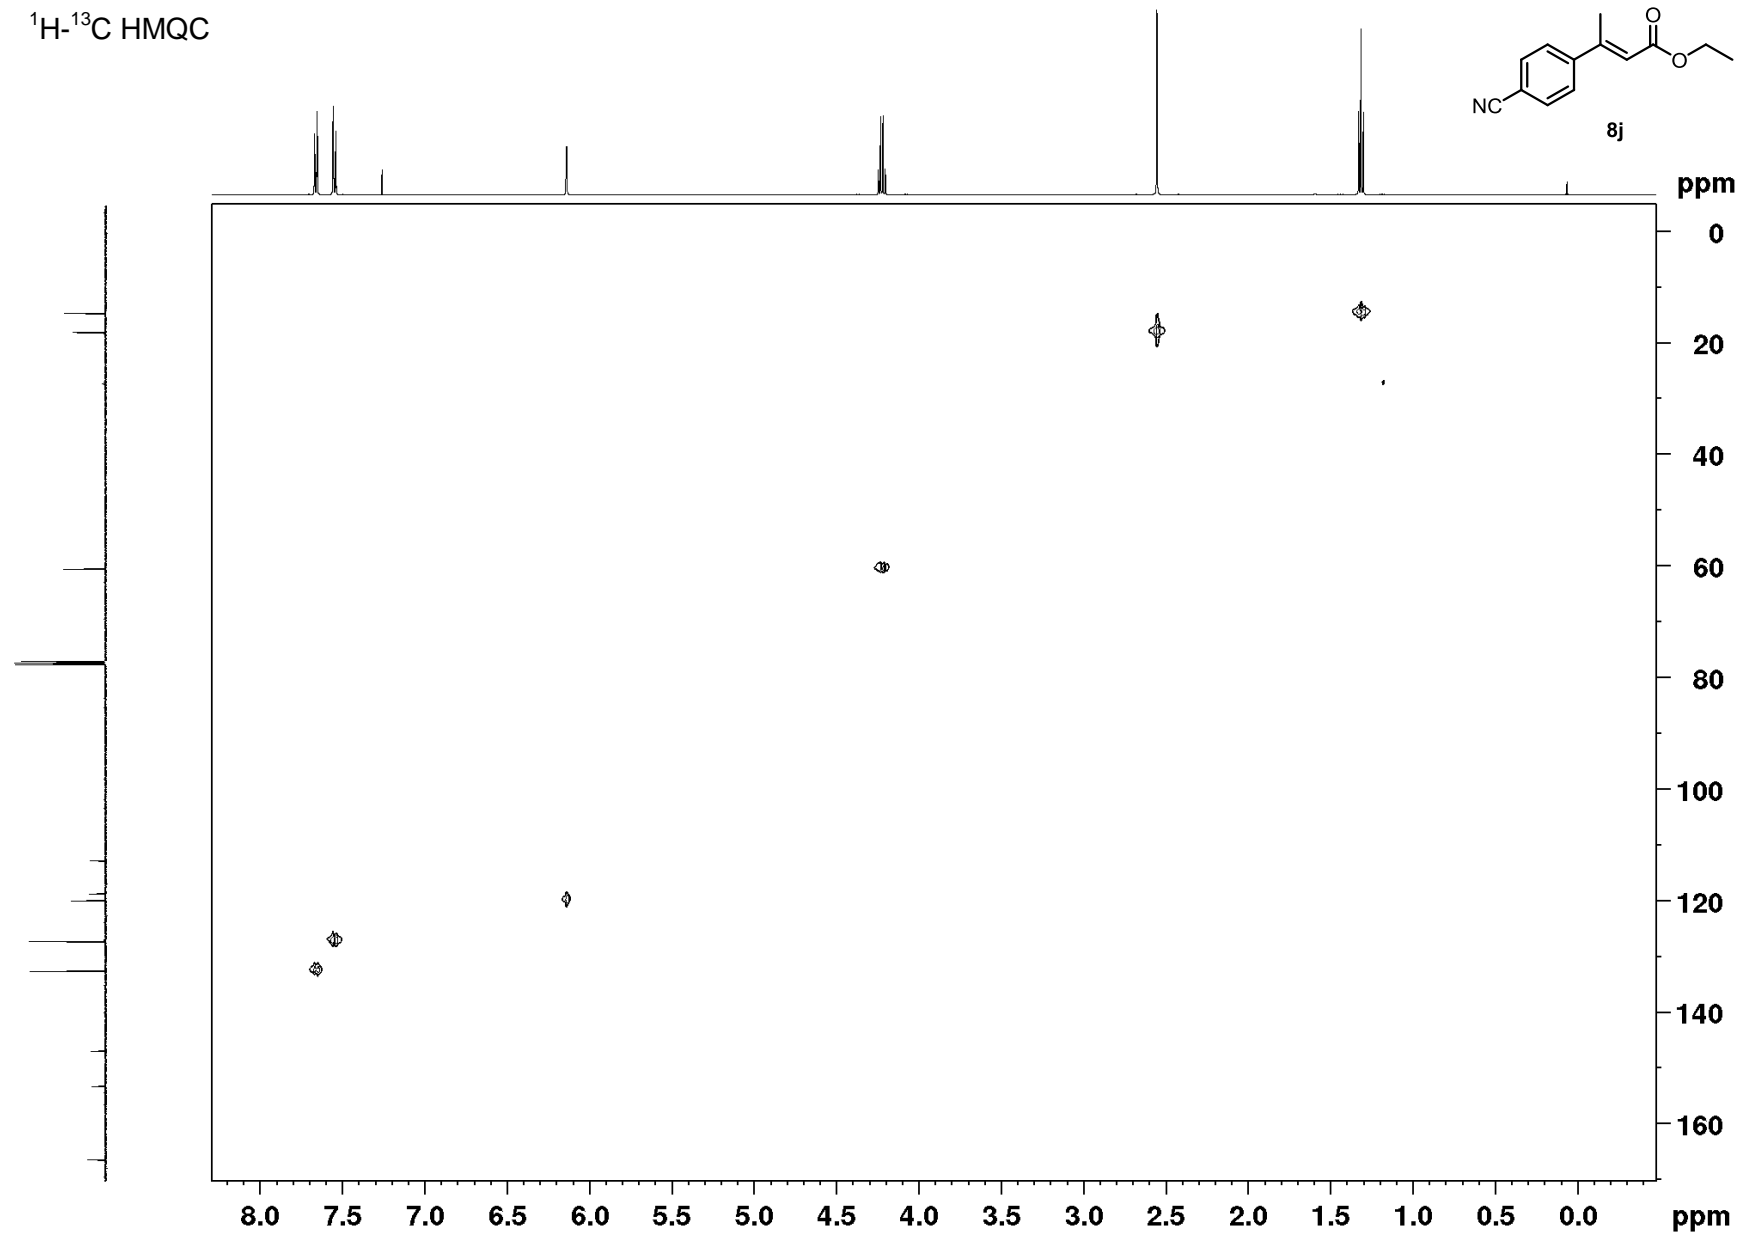

$^1\text{H}$ - $^{13}\text{C}$  HMBC

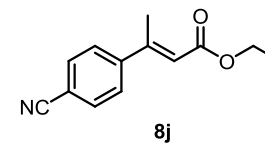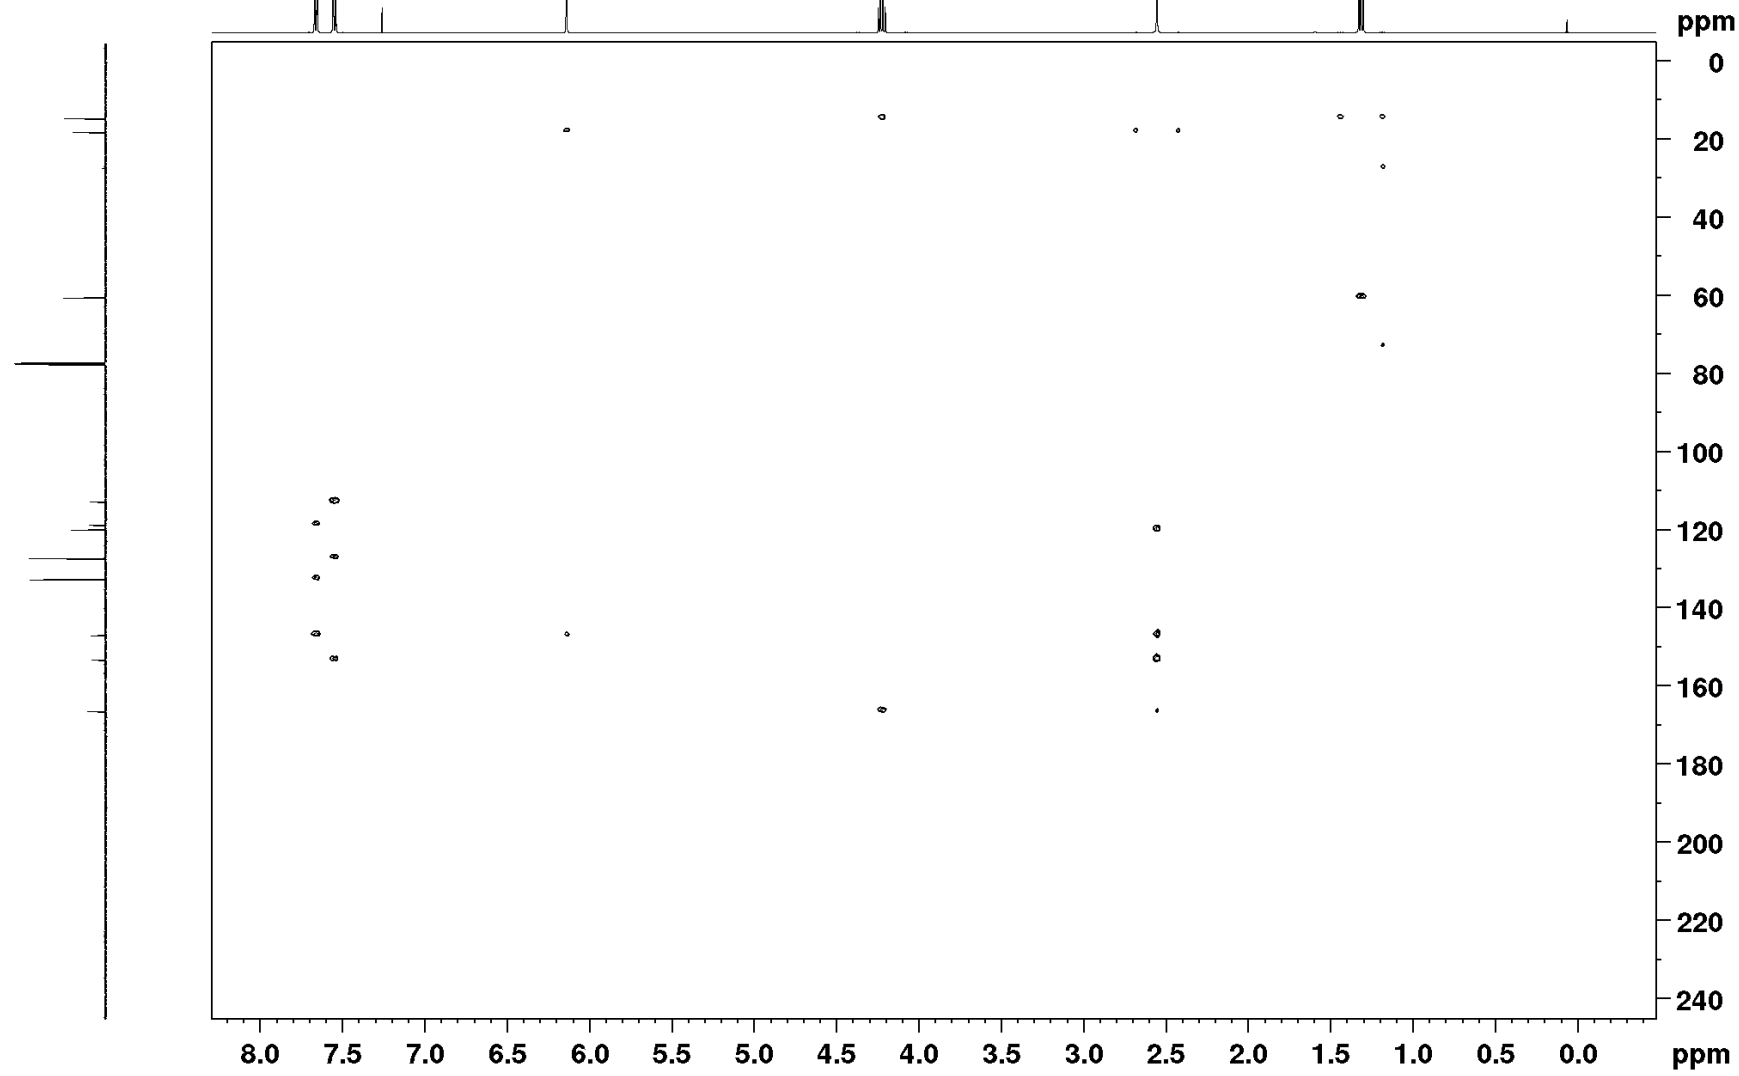

$^1\text{H}$ - $^1\text{H}$  NOESY

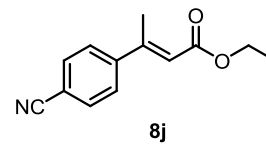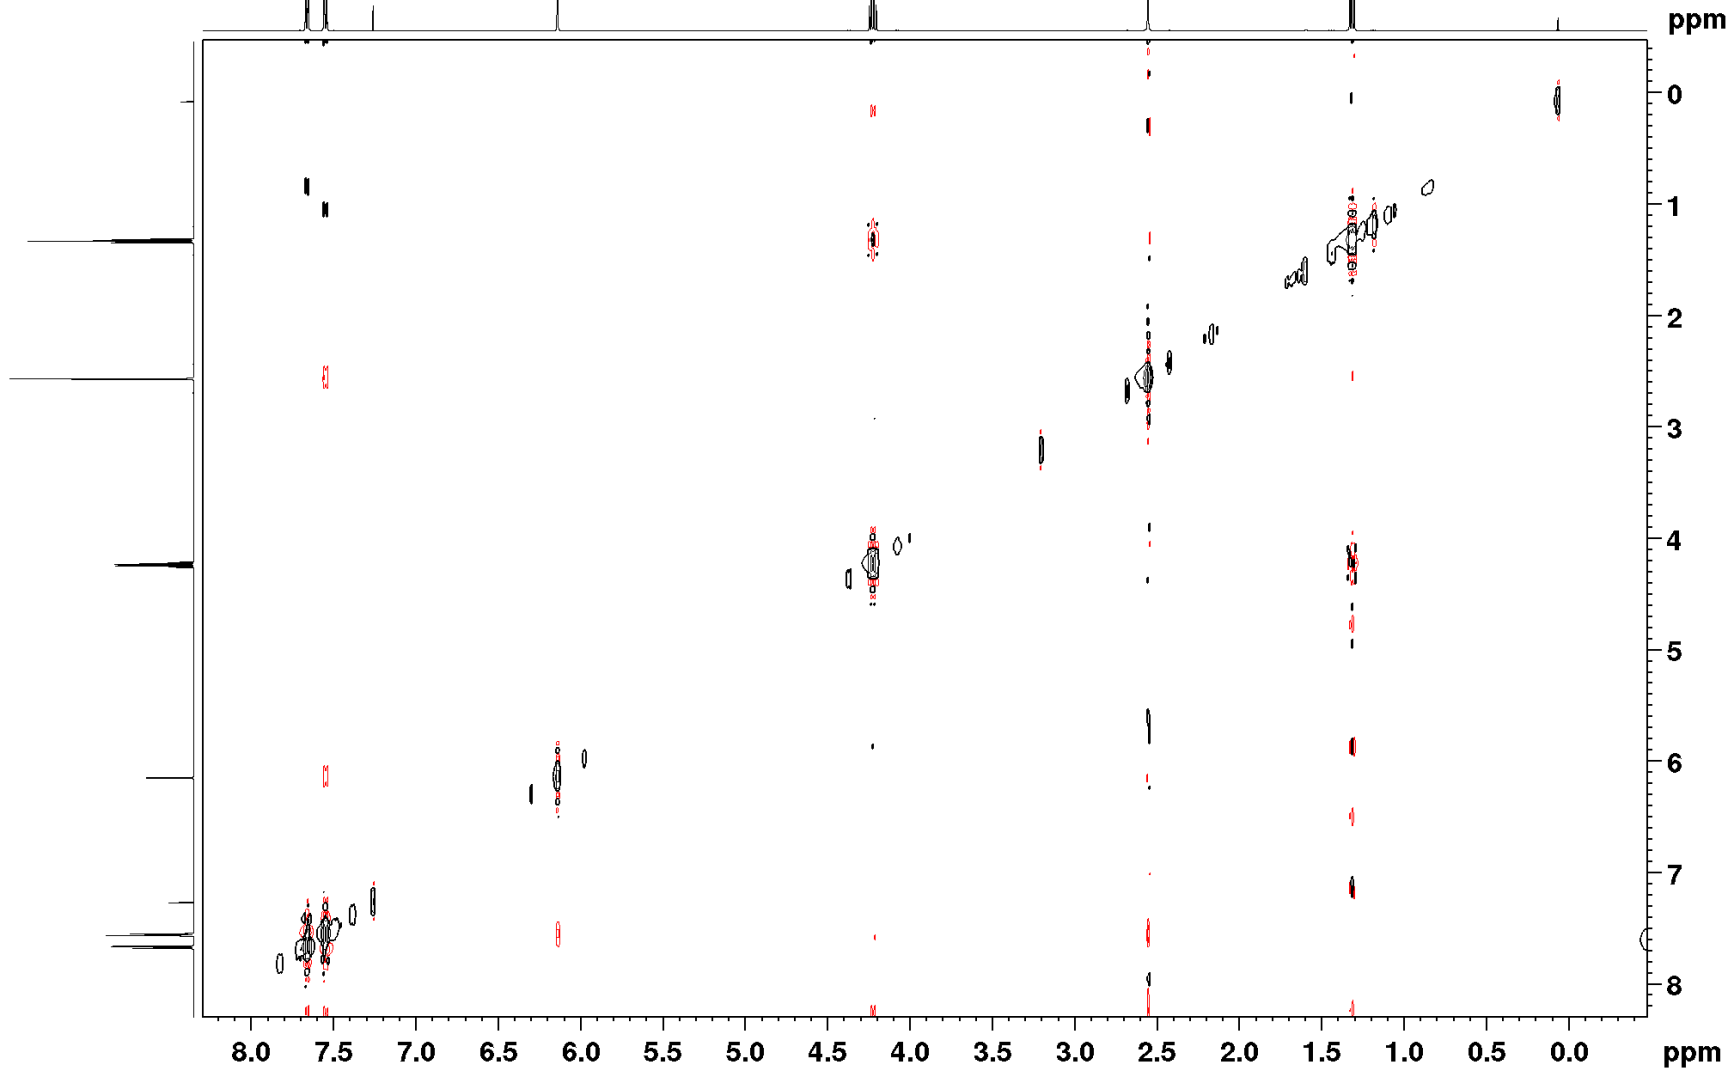

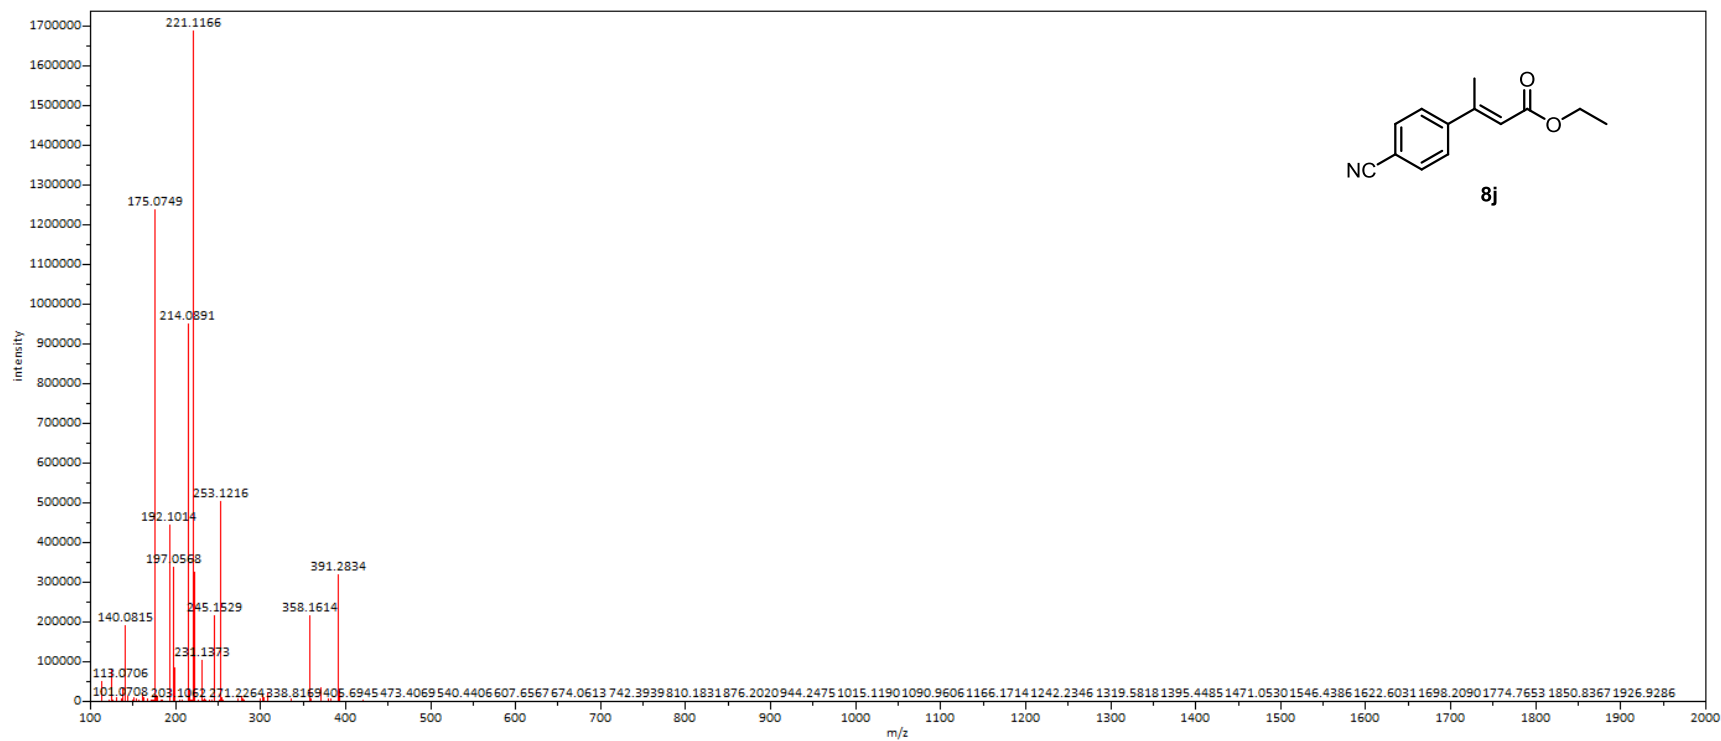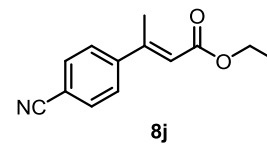



**Ethyl (*E*)-3-(4-acetylphenyl)but-2-enoate (8k)**

<sup>1</sup>H NMR

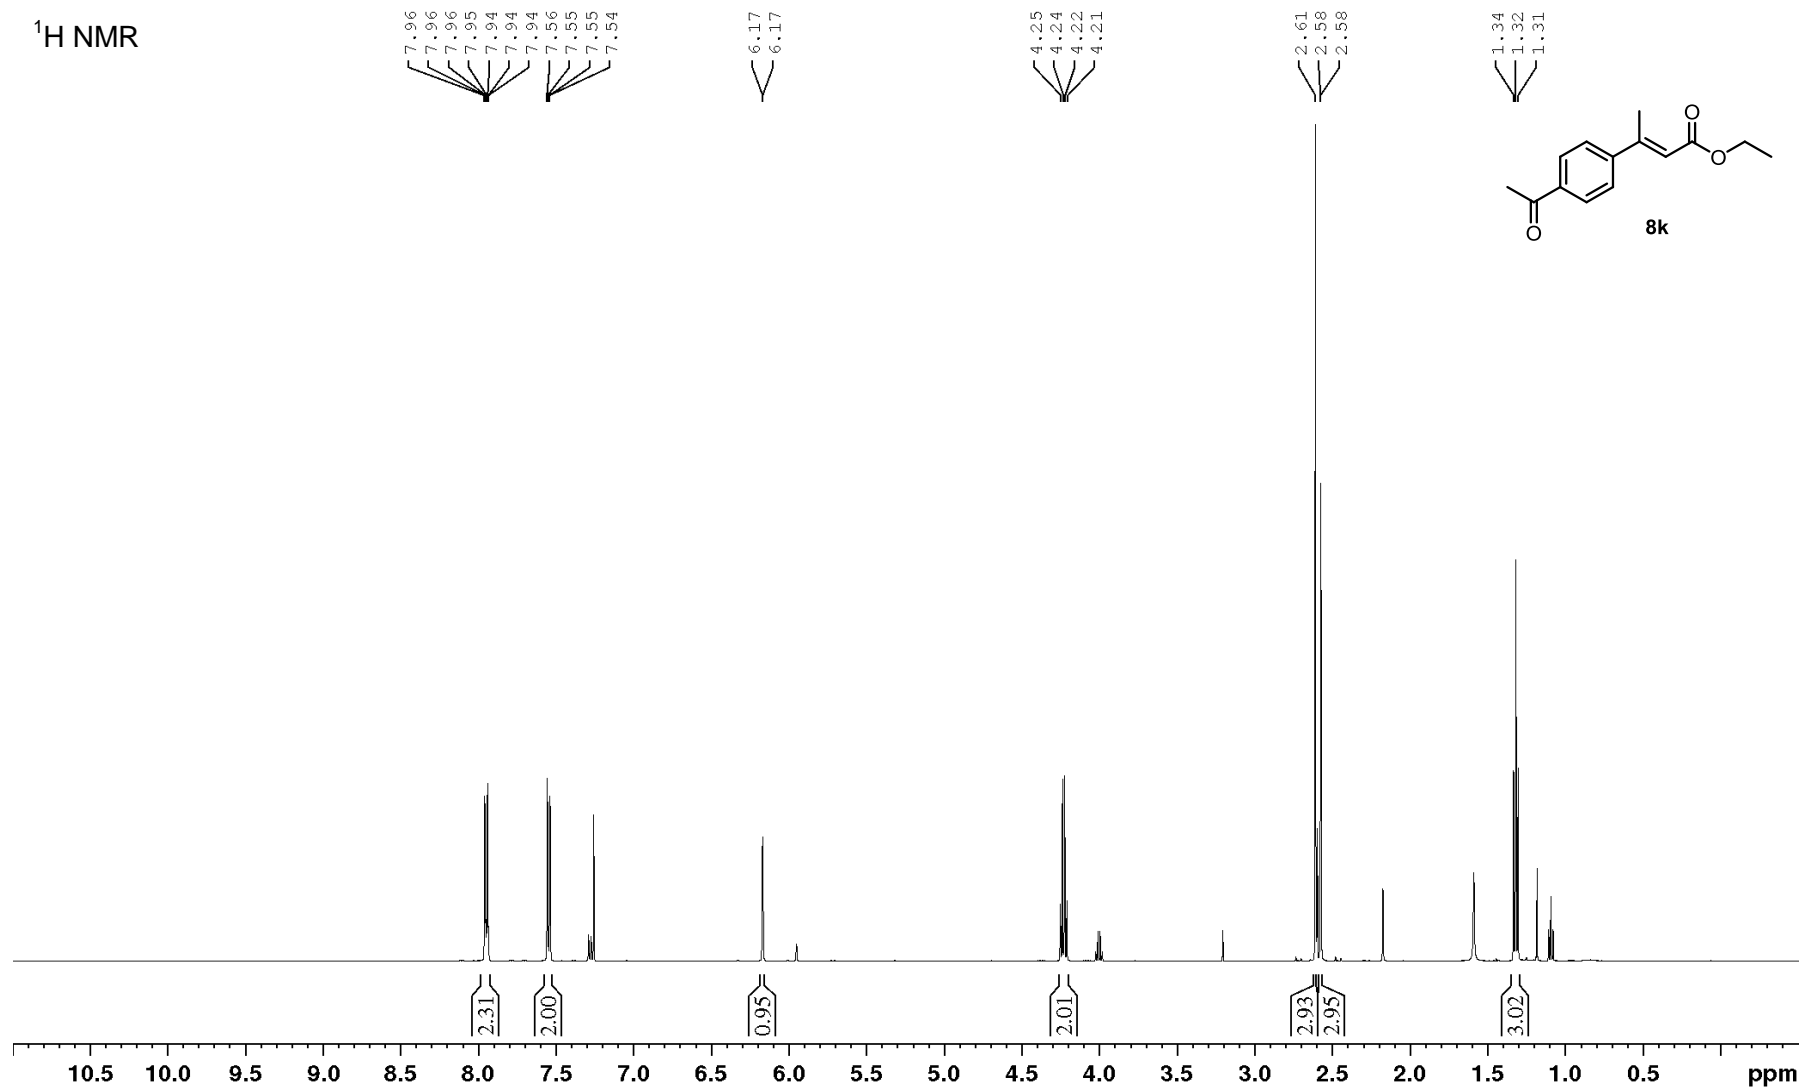

<sup>13</sup>C NMR

— 197.6

— 166.6

— 154.1

— 146.9

— 137.3

— 128.7

— 128.2

— 126.7

— 119.0

— 60.2

— 26.8

— 18.0

— 14.5

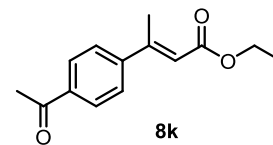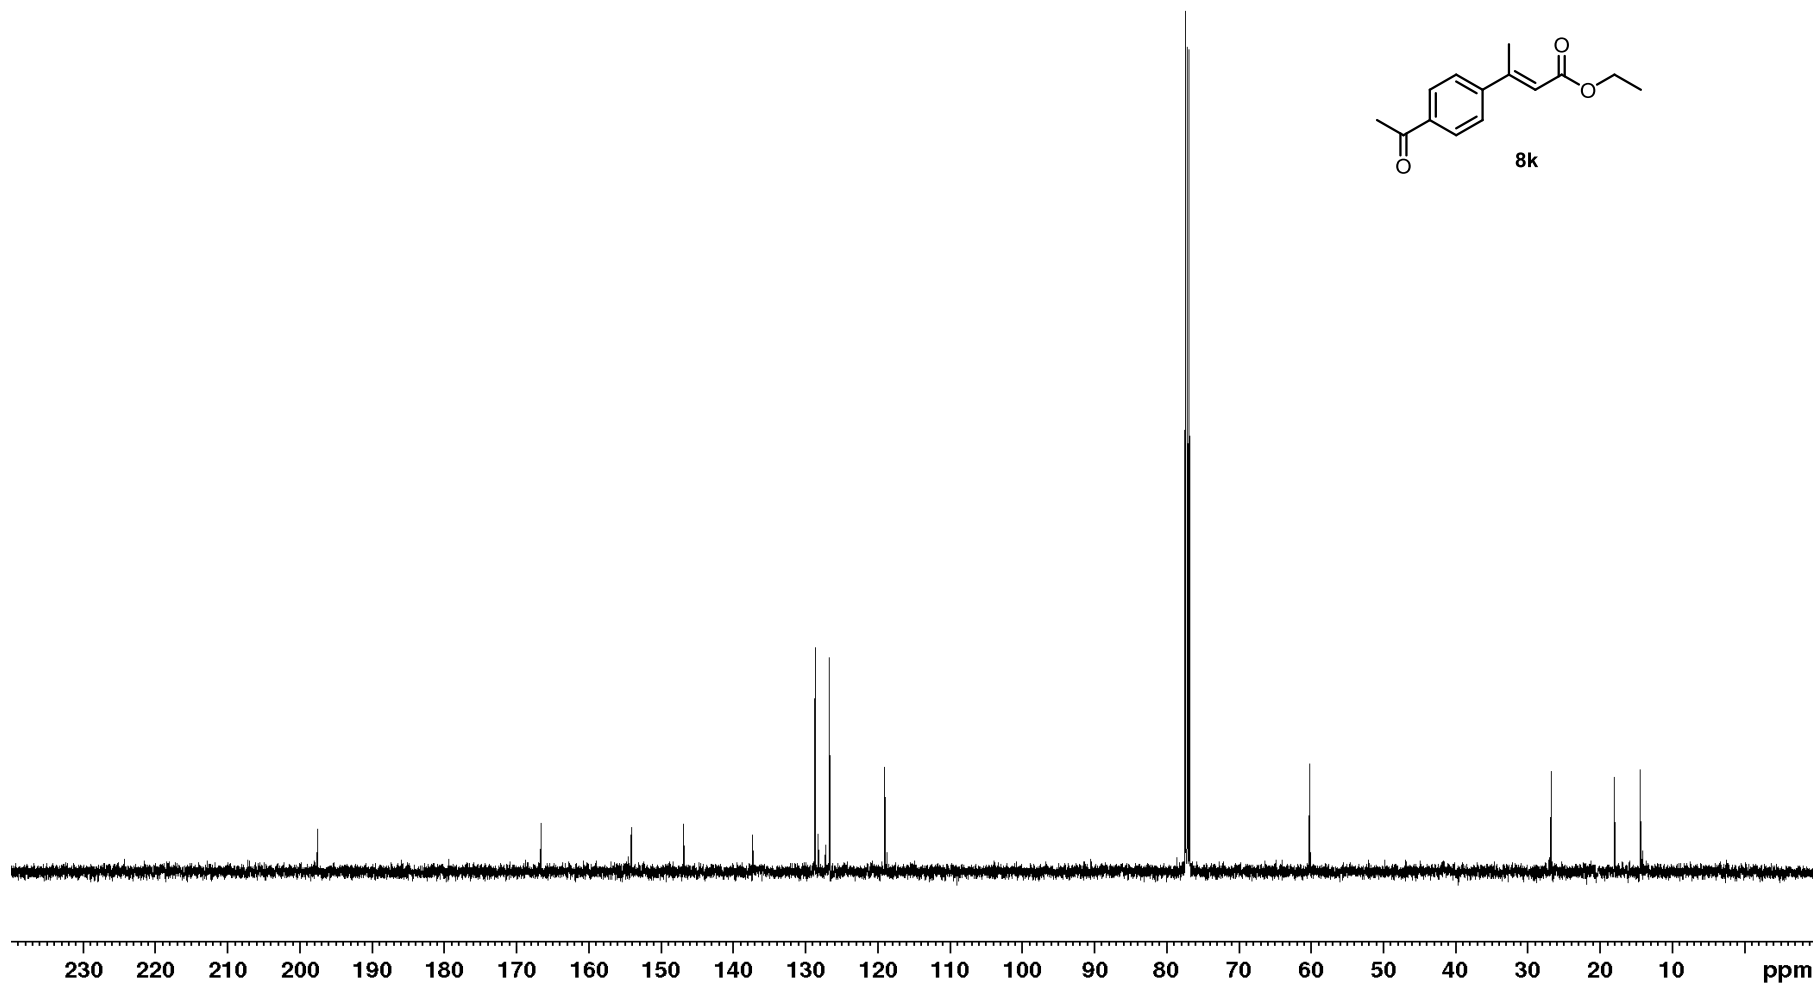

<sup>13</sup>C DEPT

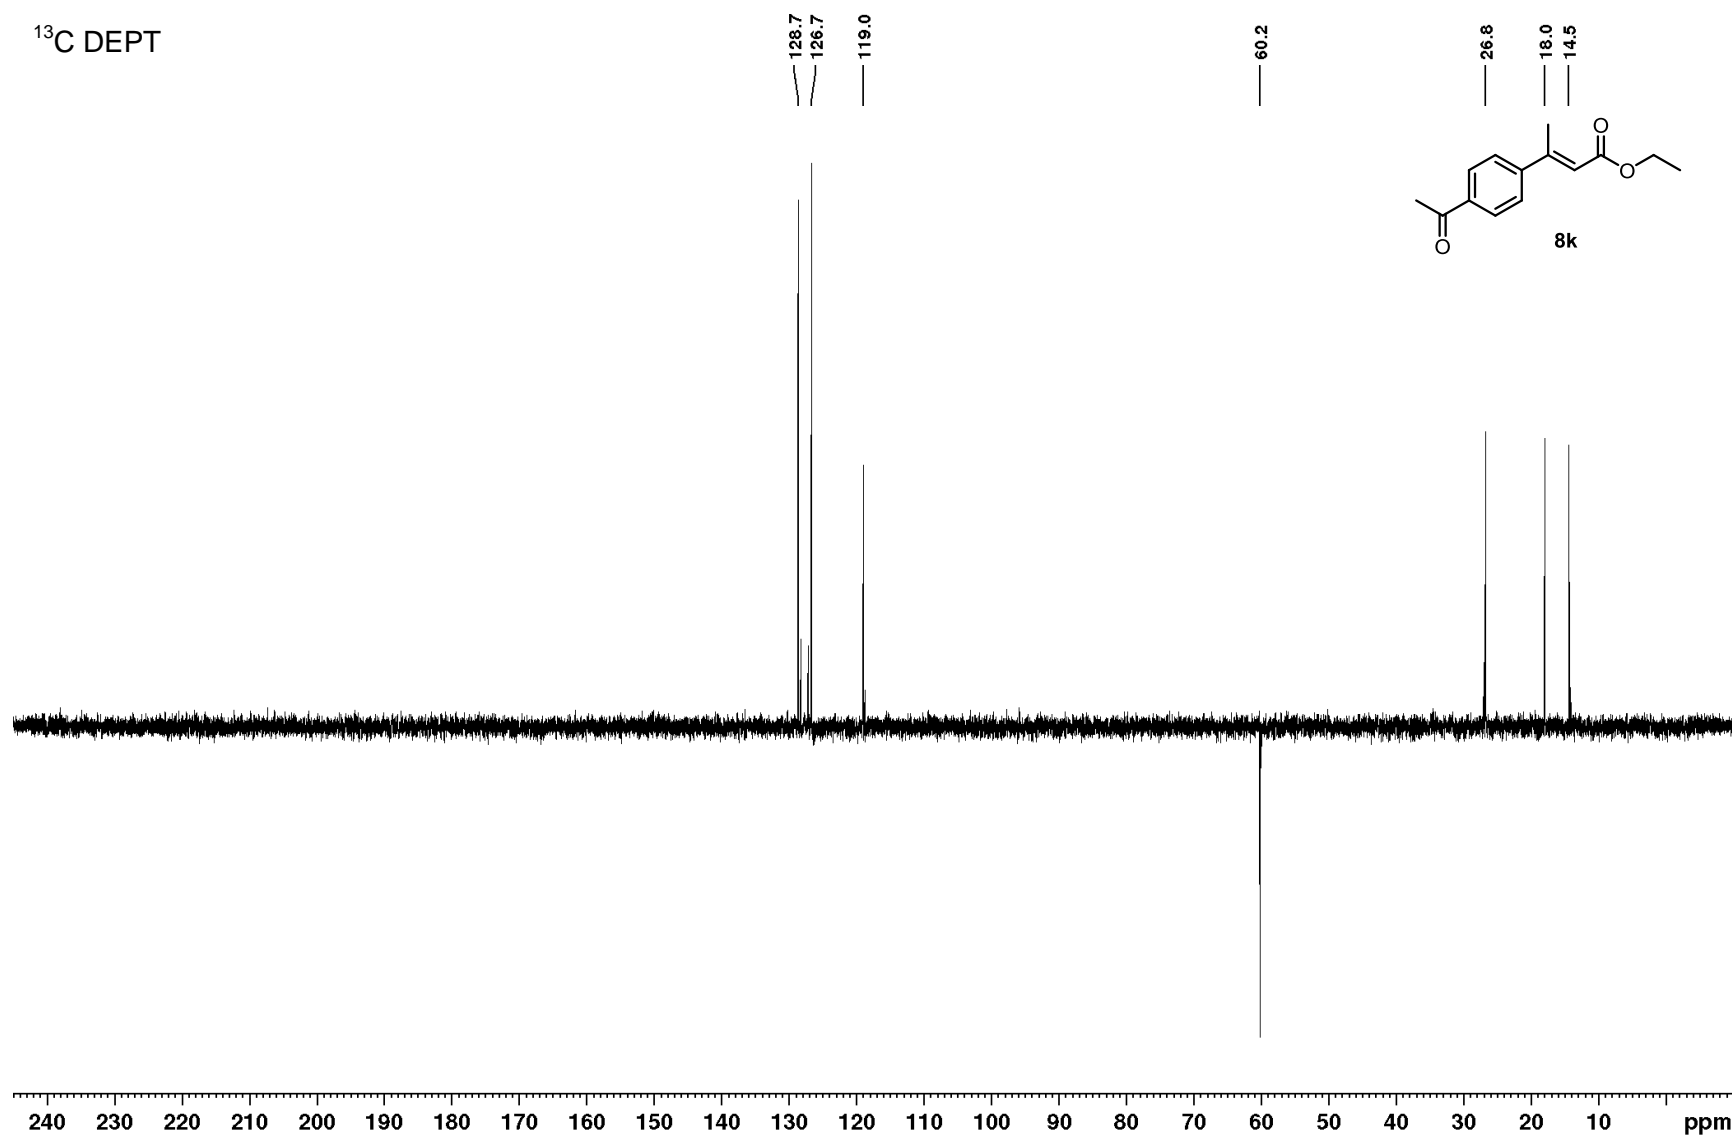

$^1\text{H}$ - $^1\text{H}$  COSY

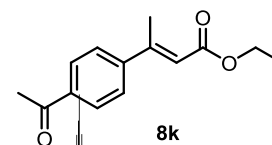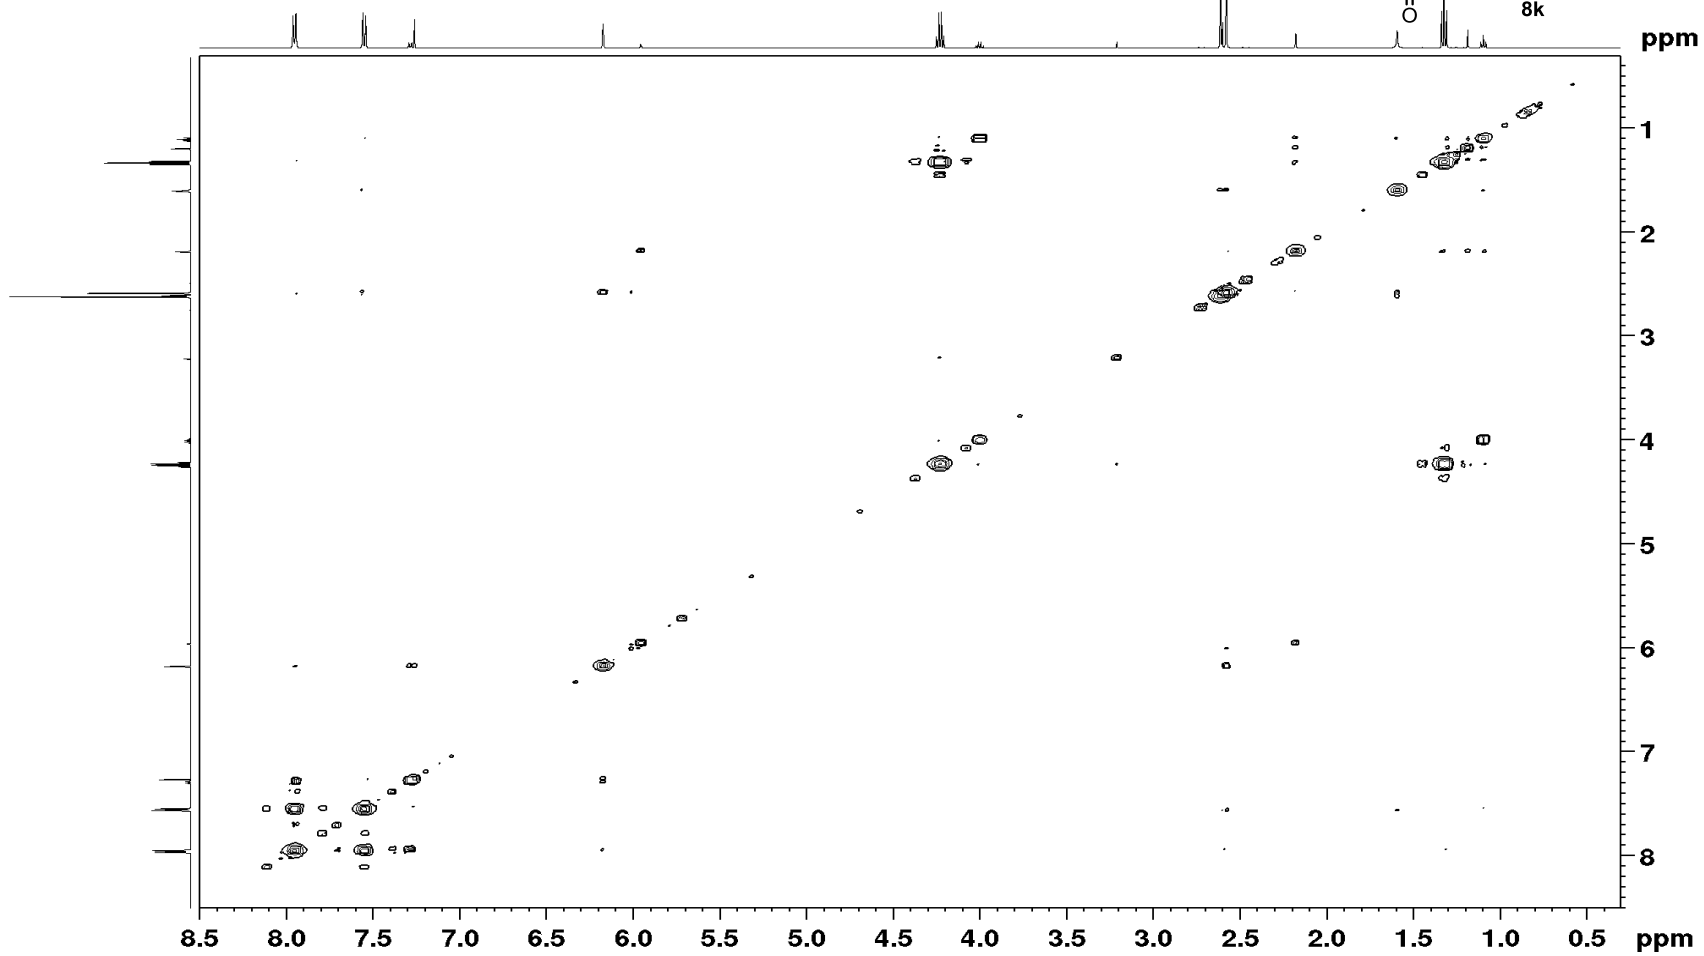

$^1\text{H}$ - $^{13}\text{C}$  HMQC

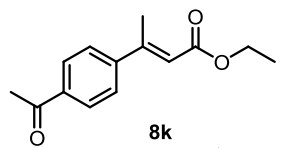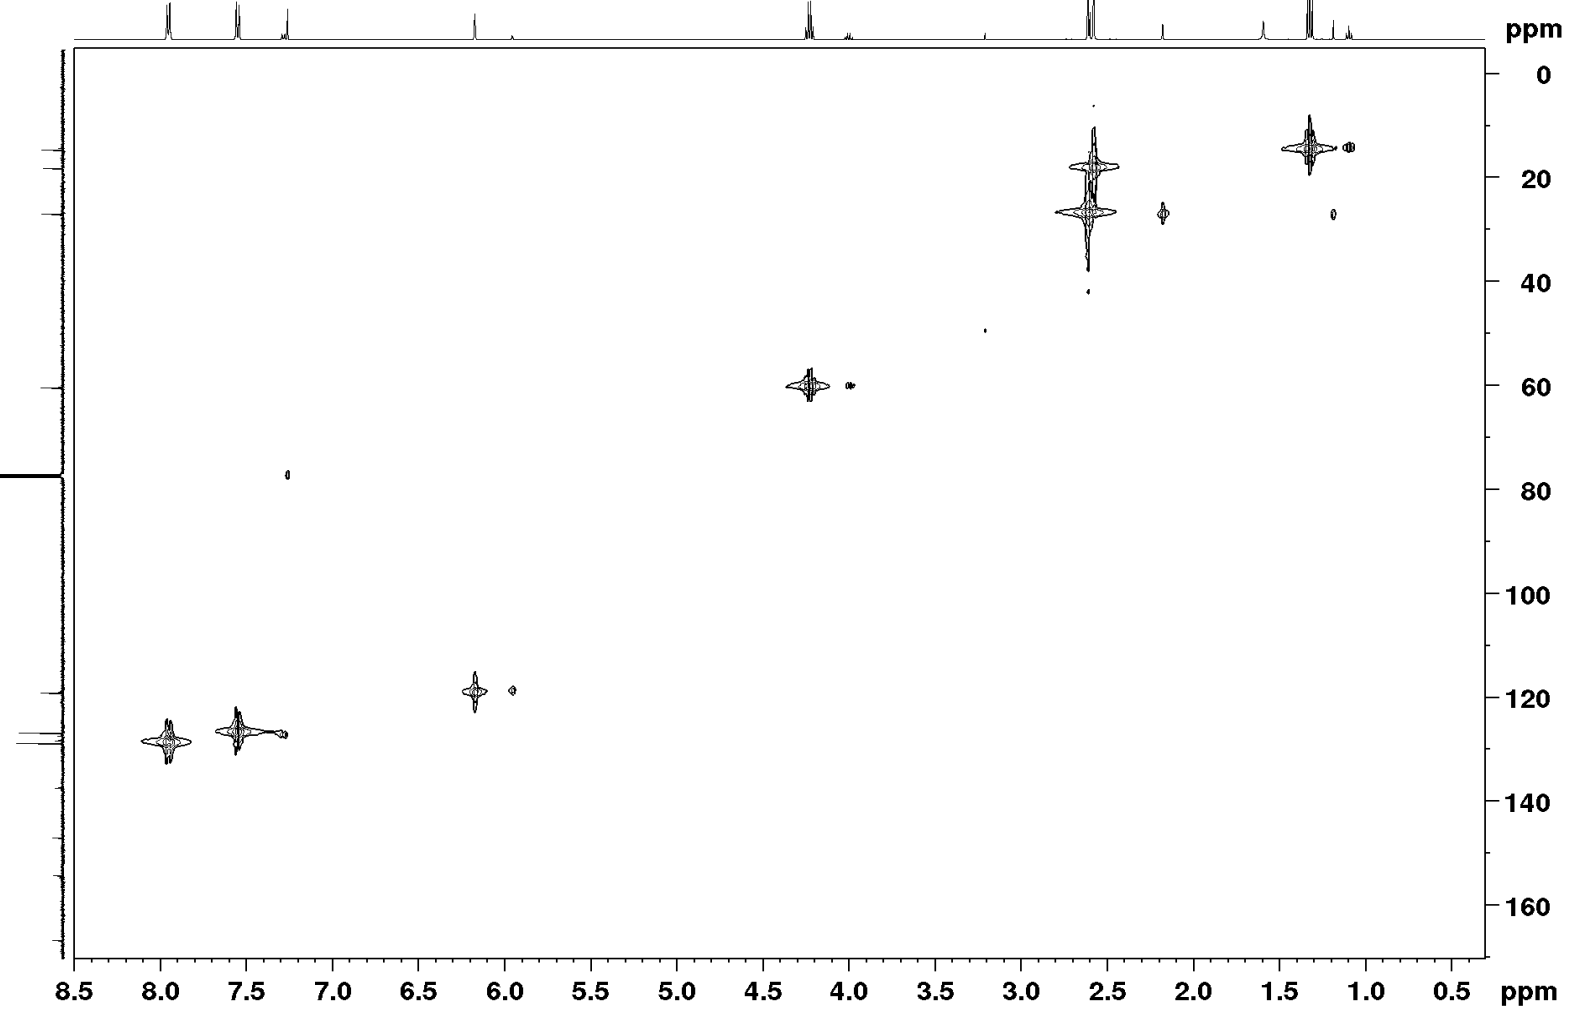

$^1\text{H}$ - $^{13}\text{C}$  HMBC

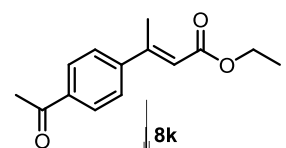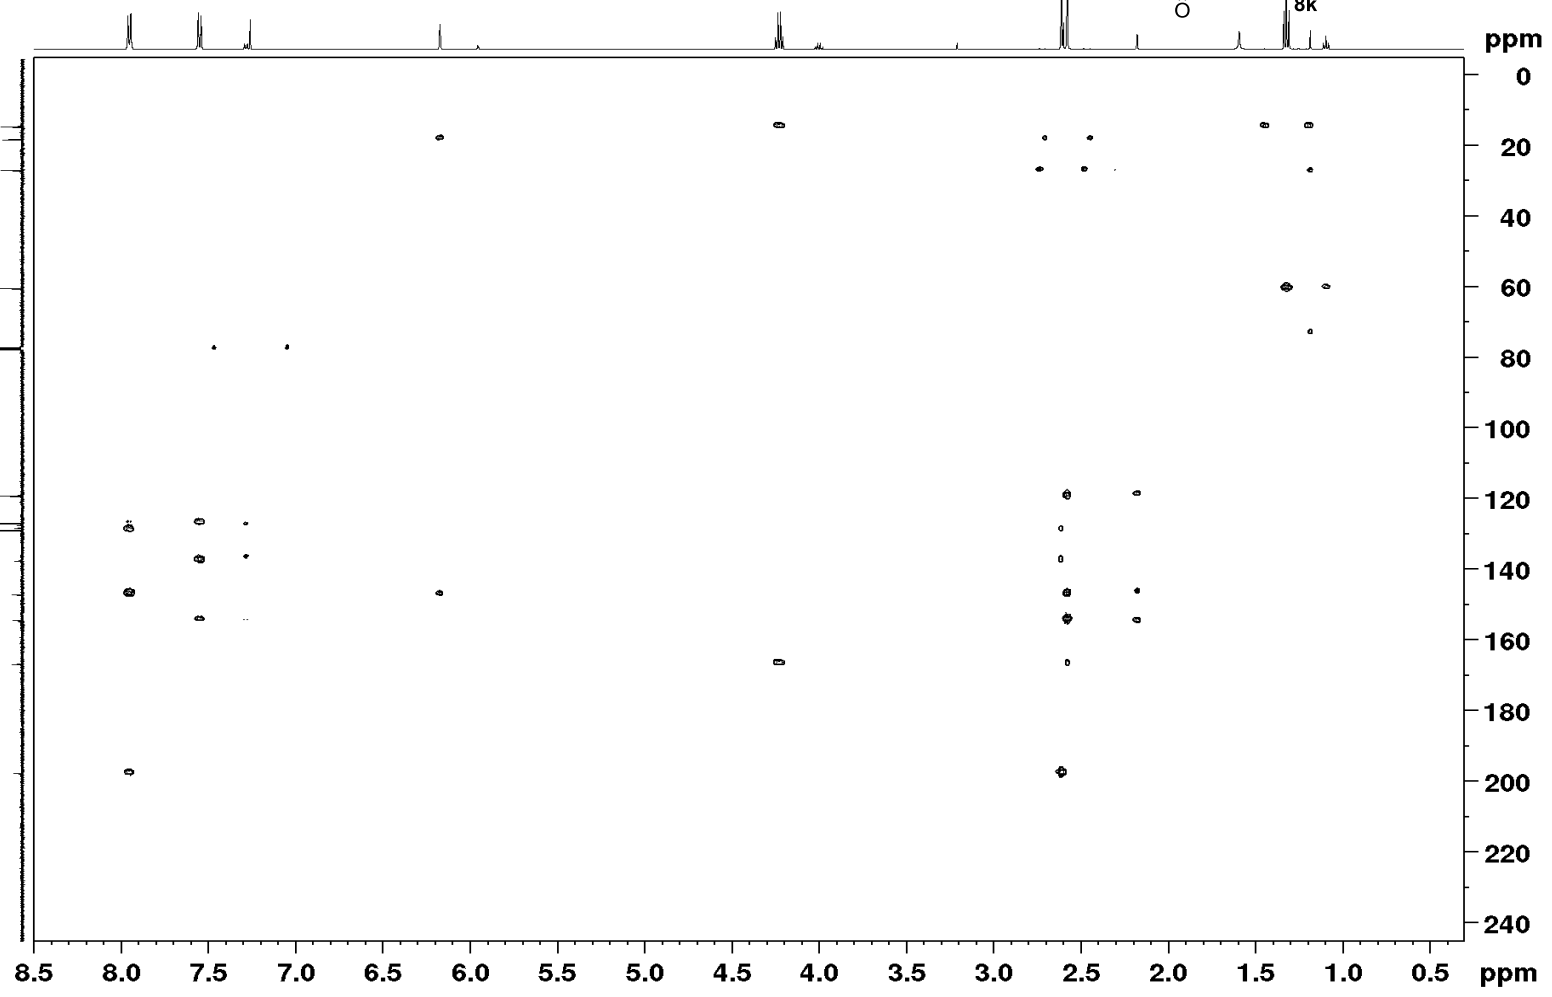

$^1\text{H}$ - $^1\text{H}$  NOESY

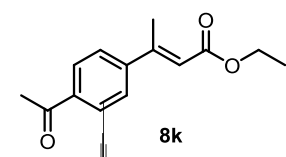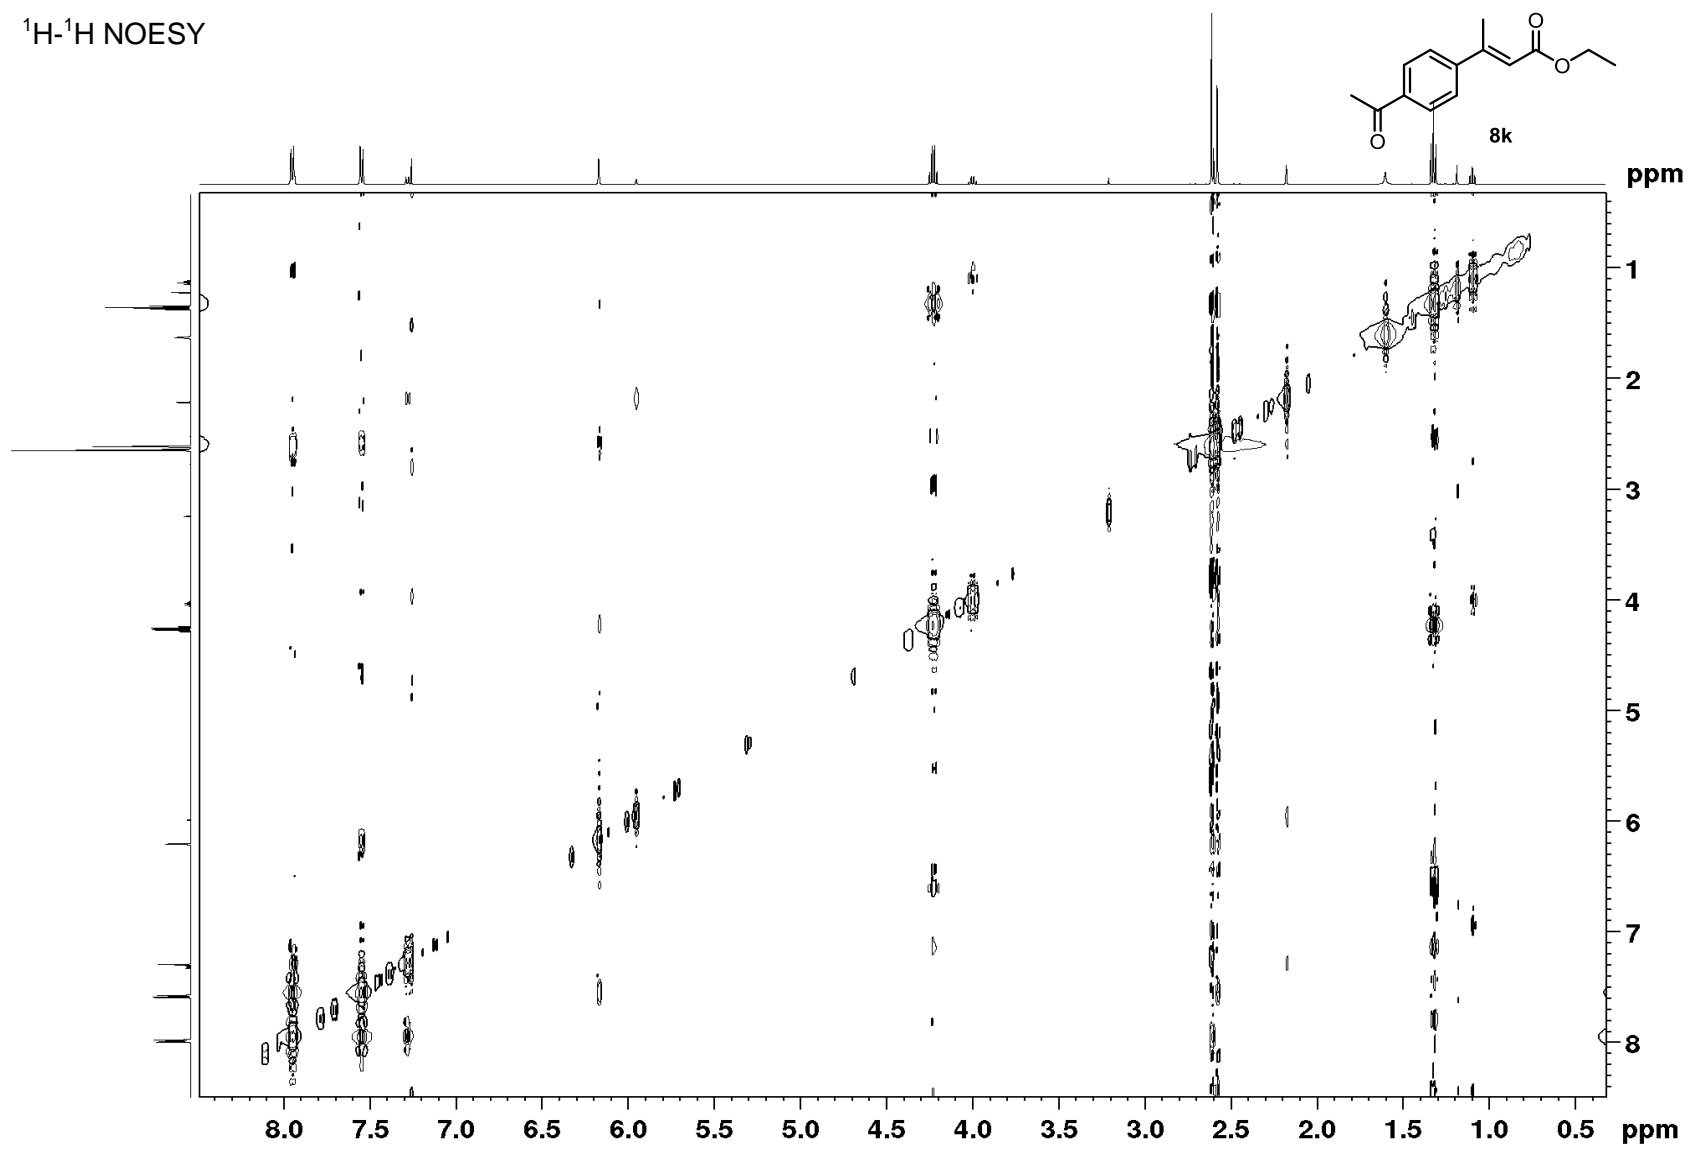

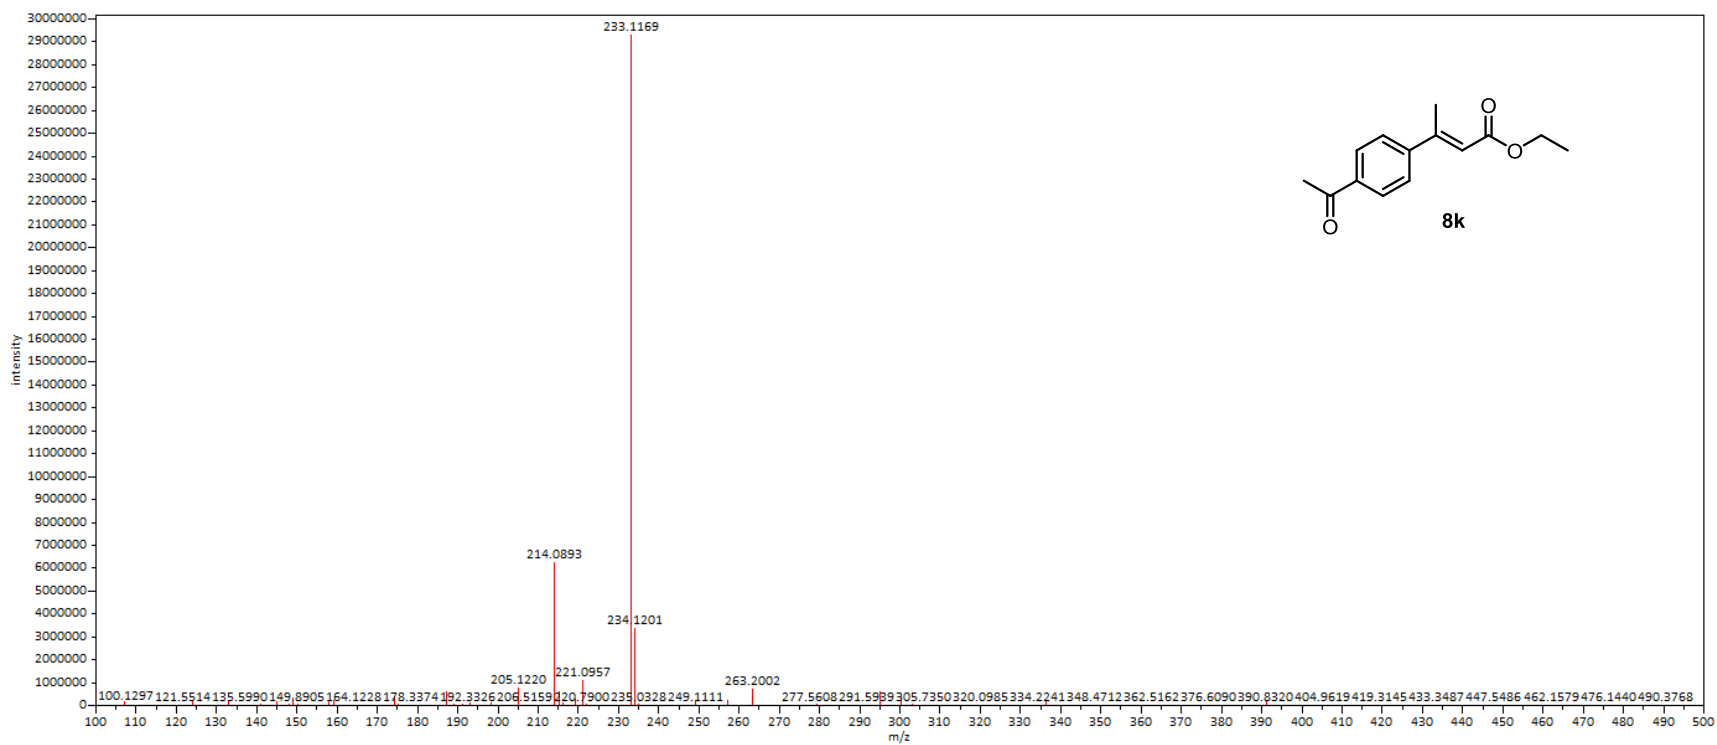



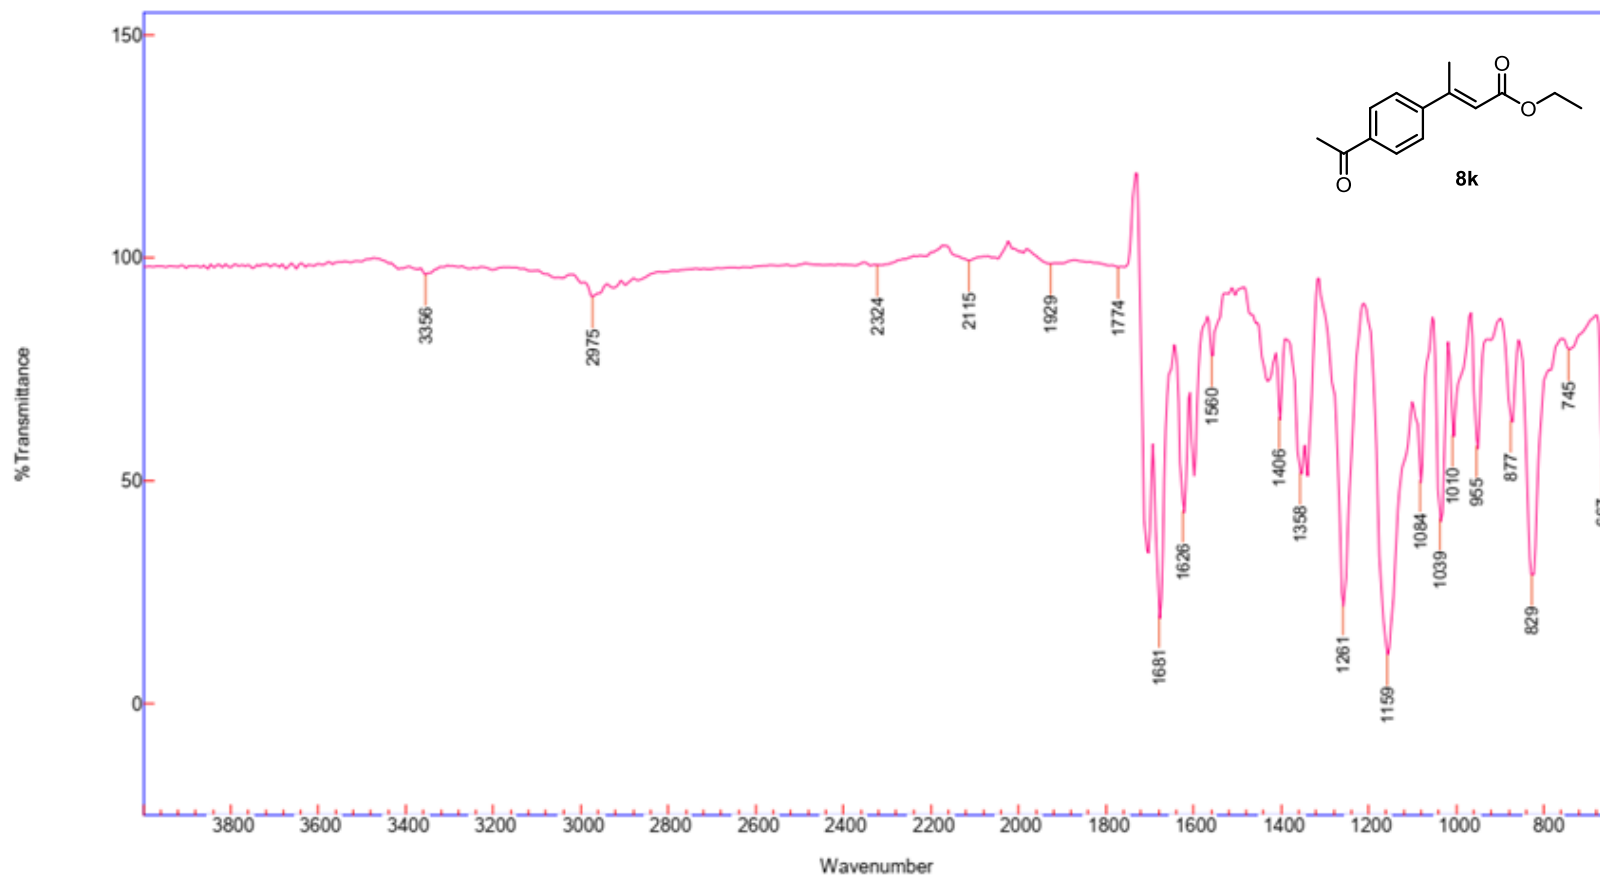

**Ethyl (*E*)-3-(4-hydroxyphenyl)but-2-enoate (81)**

<sup>1</sup>H NMR

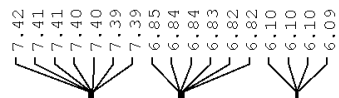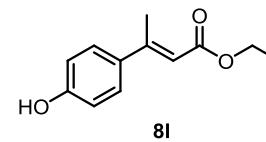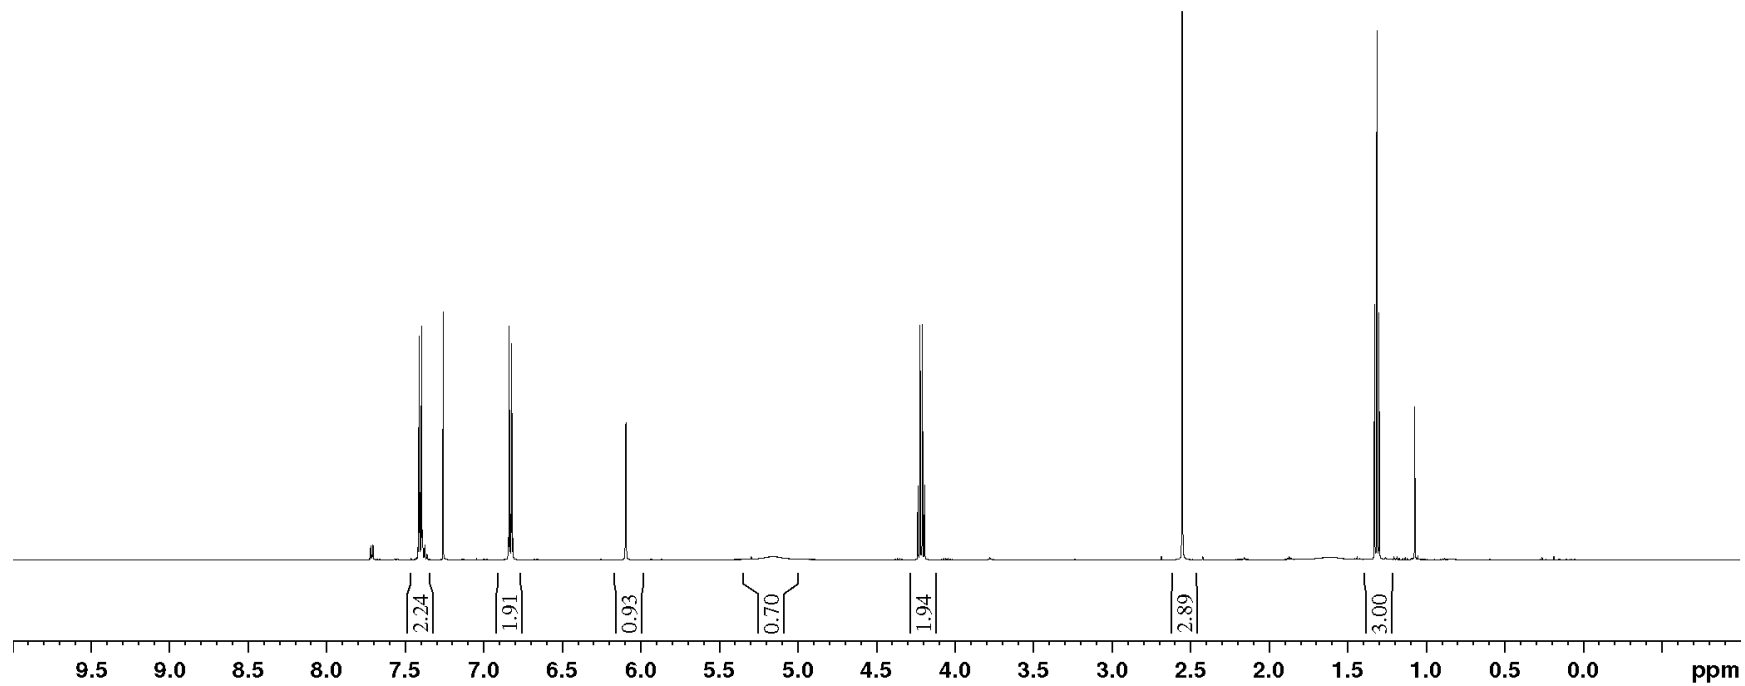

<sup>13</sup>C NMR

167.3

156.7  
155.1  
155.1

134.9  
134.7

128.0

115.5  
115.5

59.9

17.8  
14.5

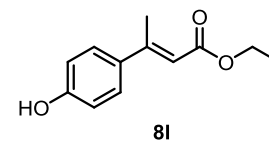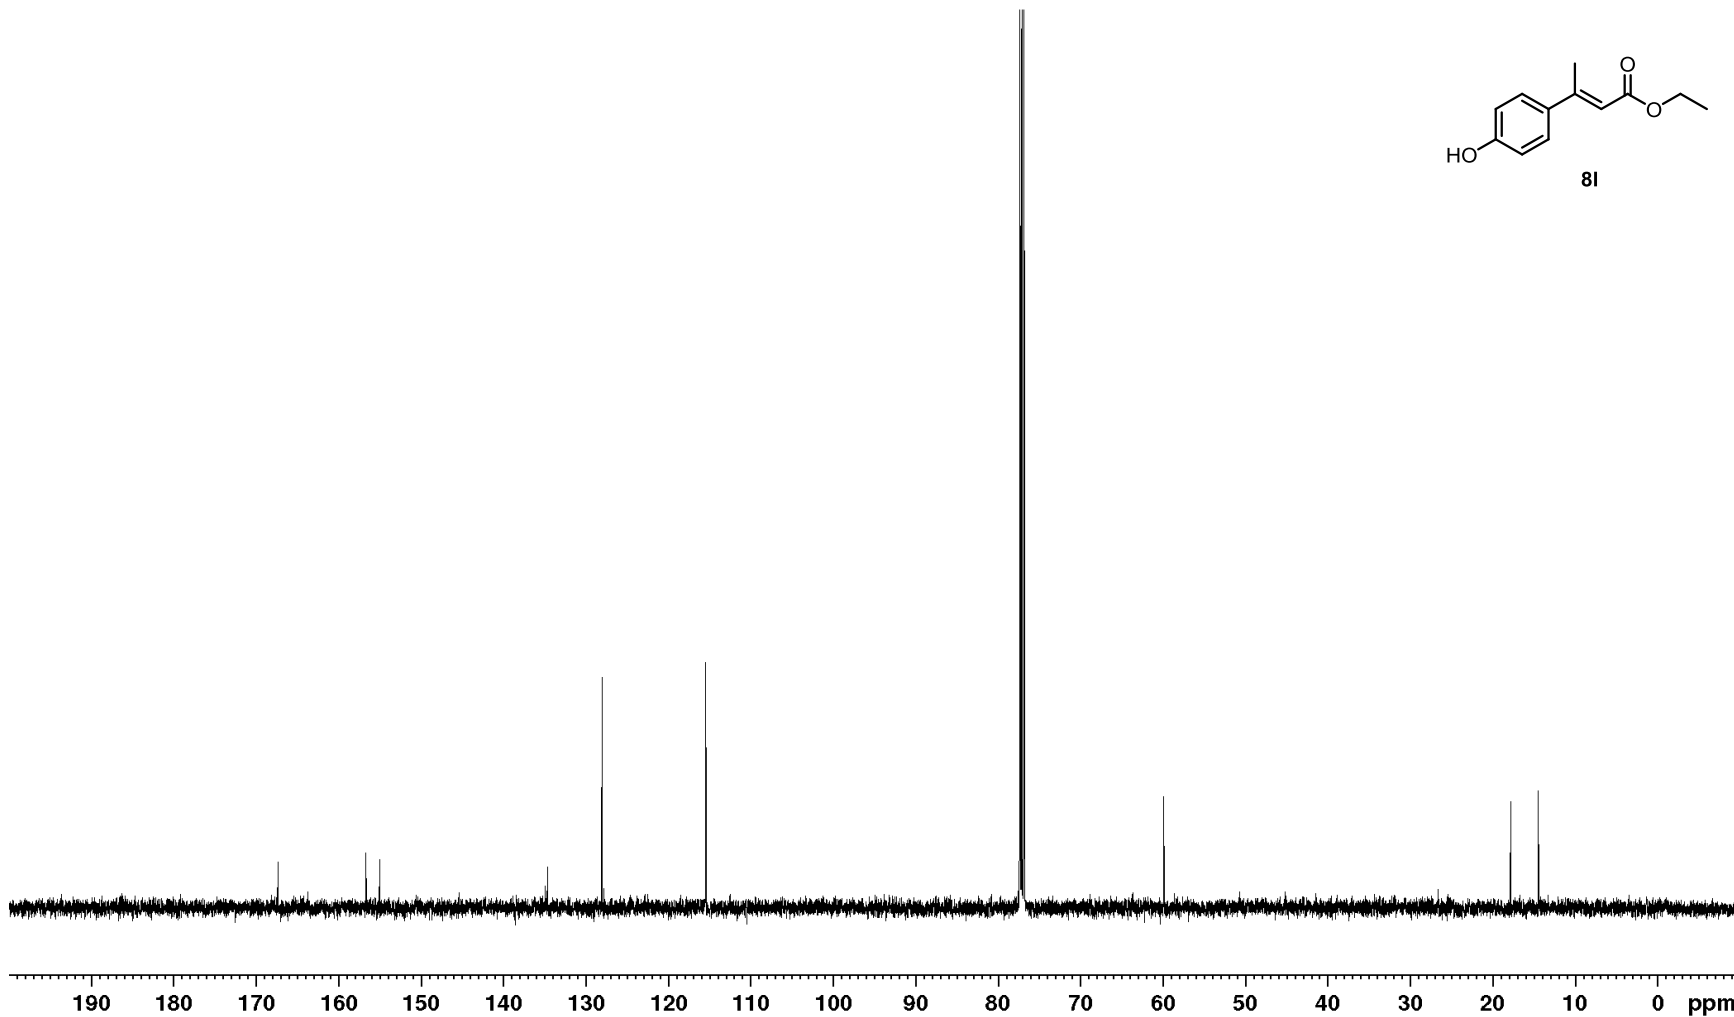

$^1\text{H}$ - $^1\text{H}$  COSY

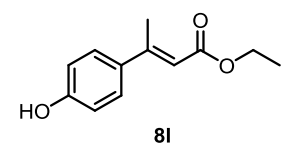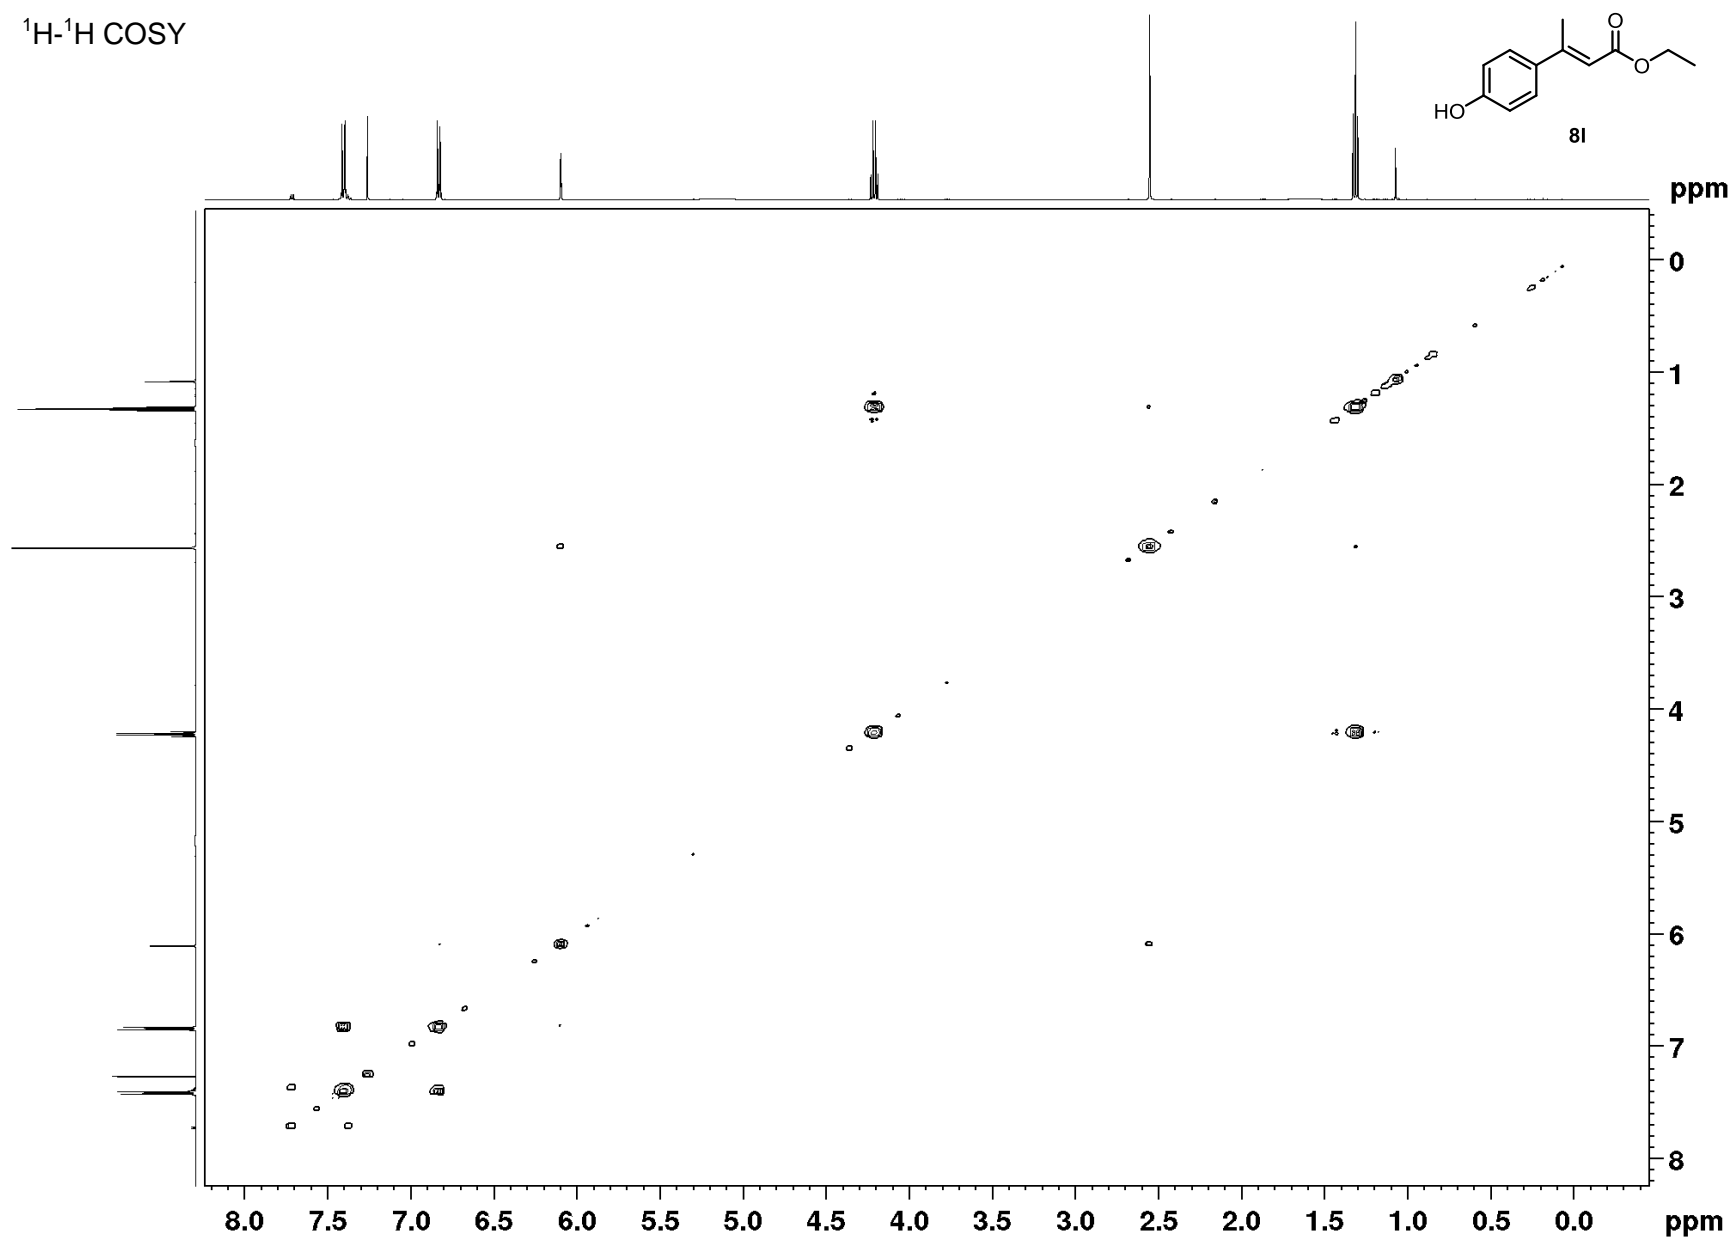

$^1\text{H}$ - $^{13}\text{C}$  HSQC

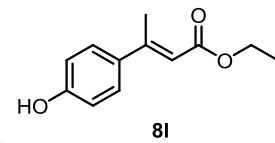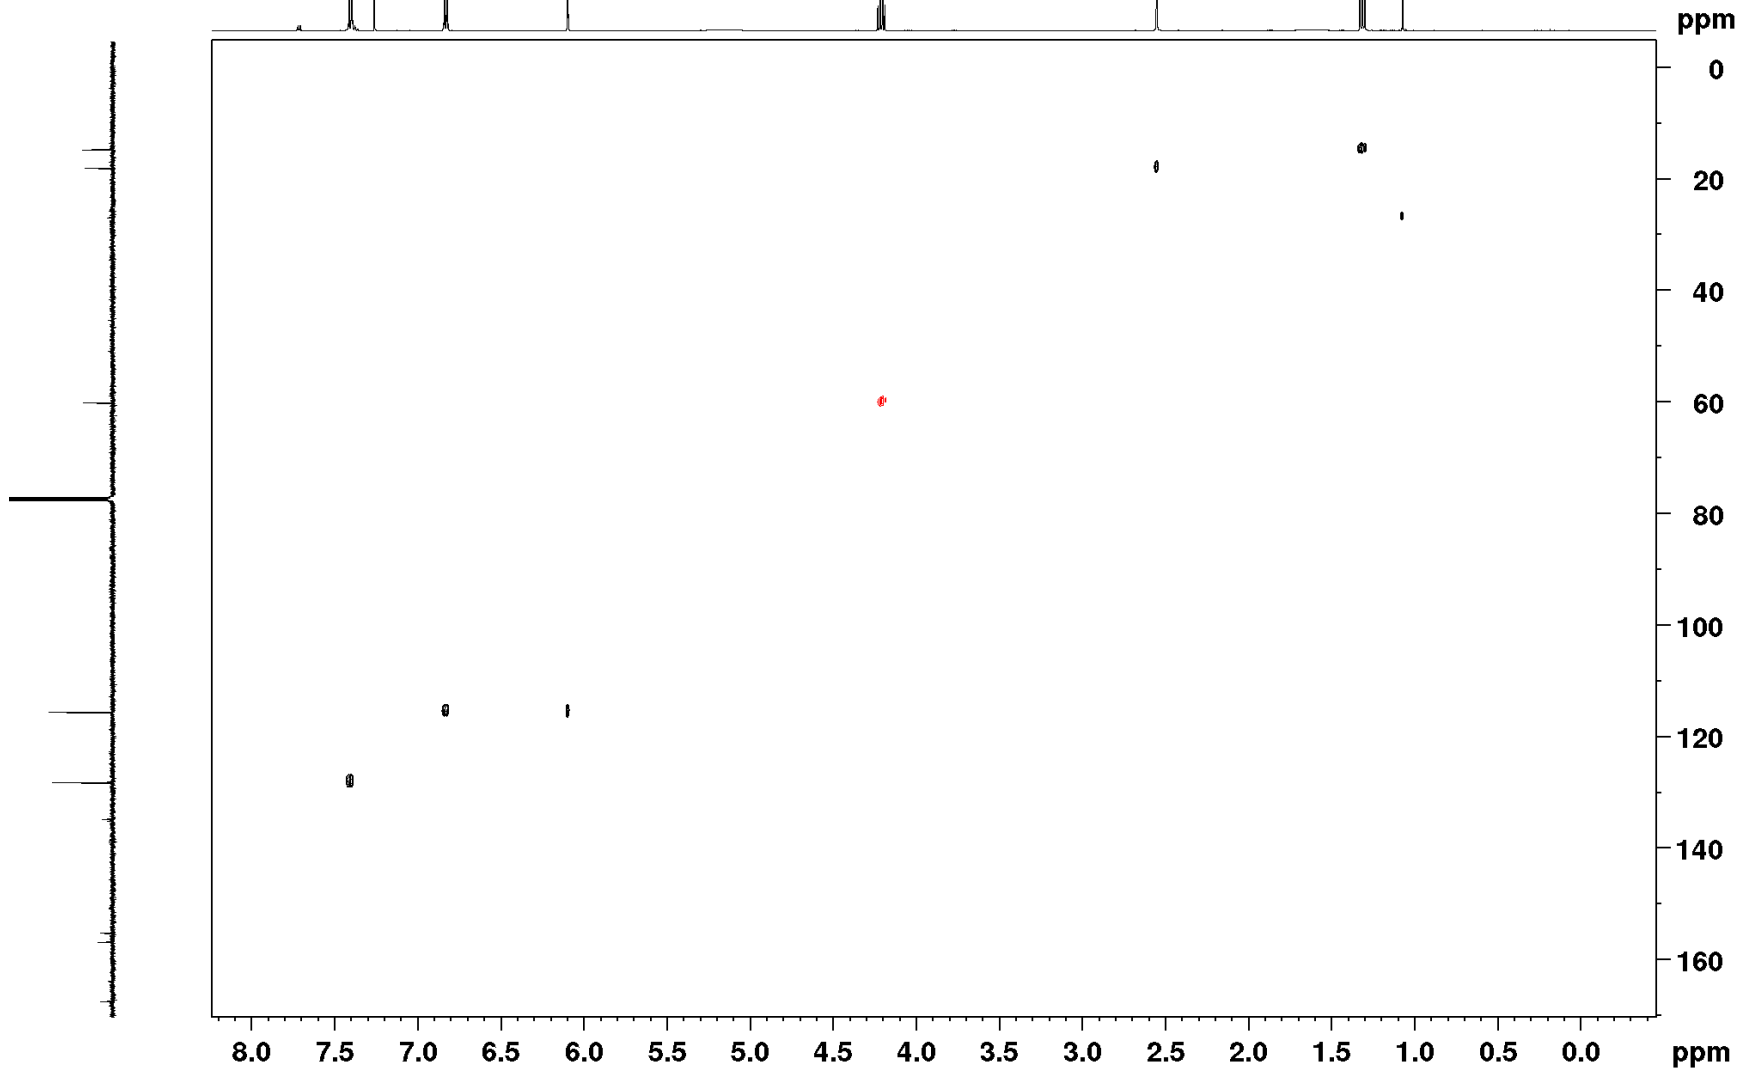

S433

$^1\text{H}$ - $^{13}\text{C}$  HMBC

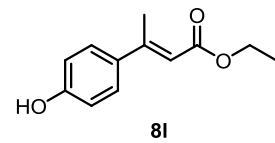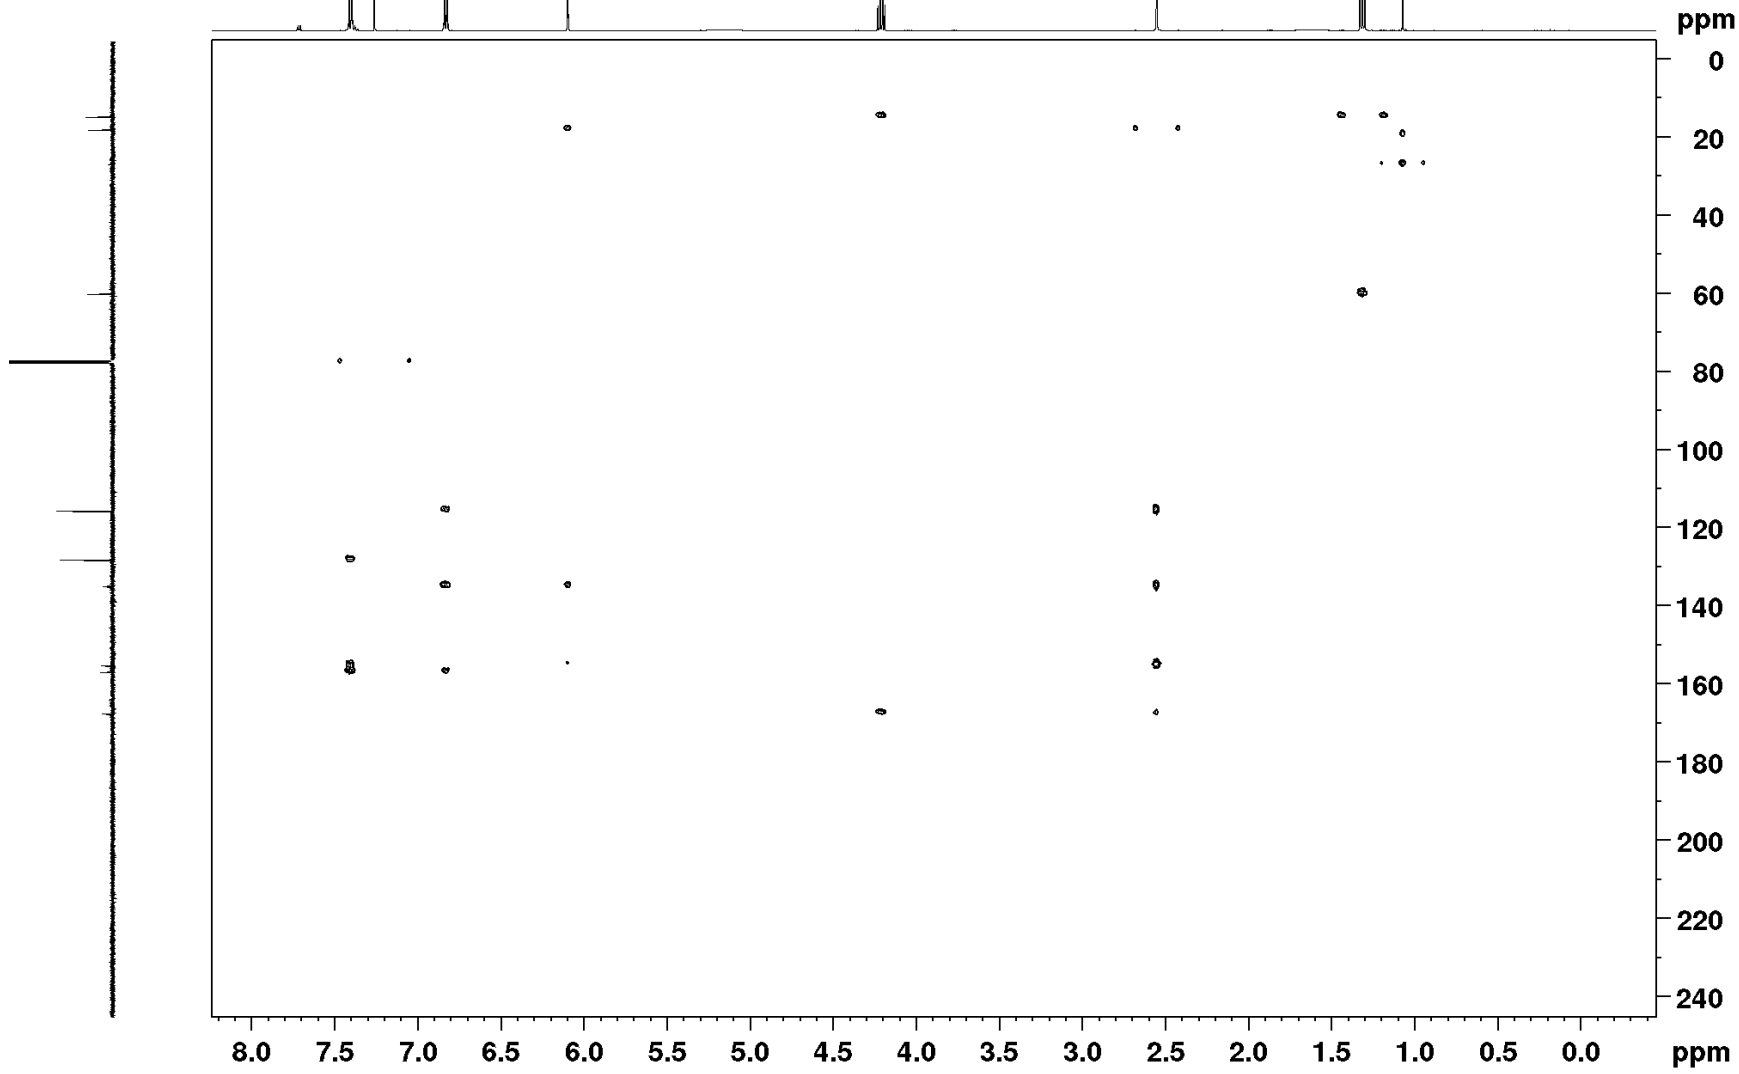

$^1\text{H}$ - $^1\text{H}$  NOESY

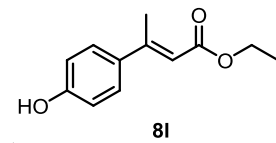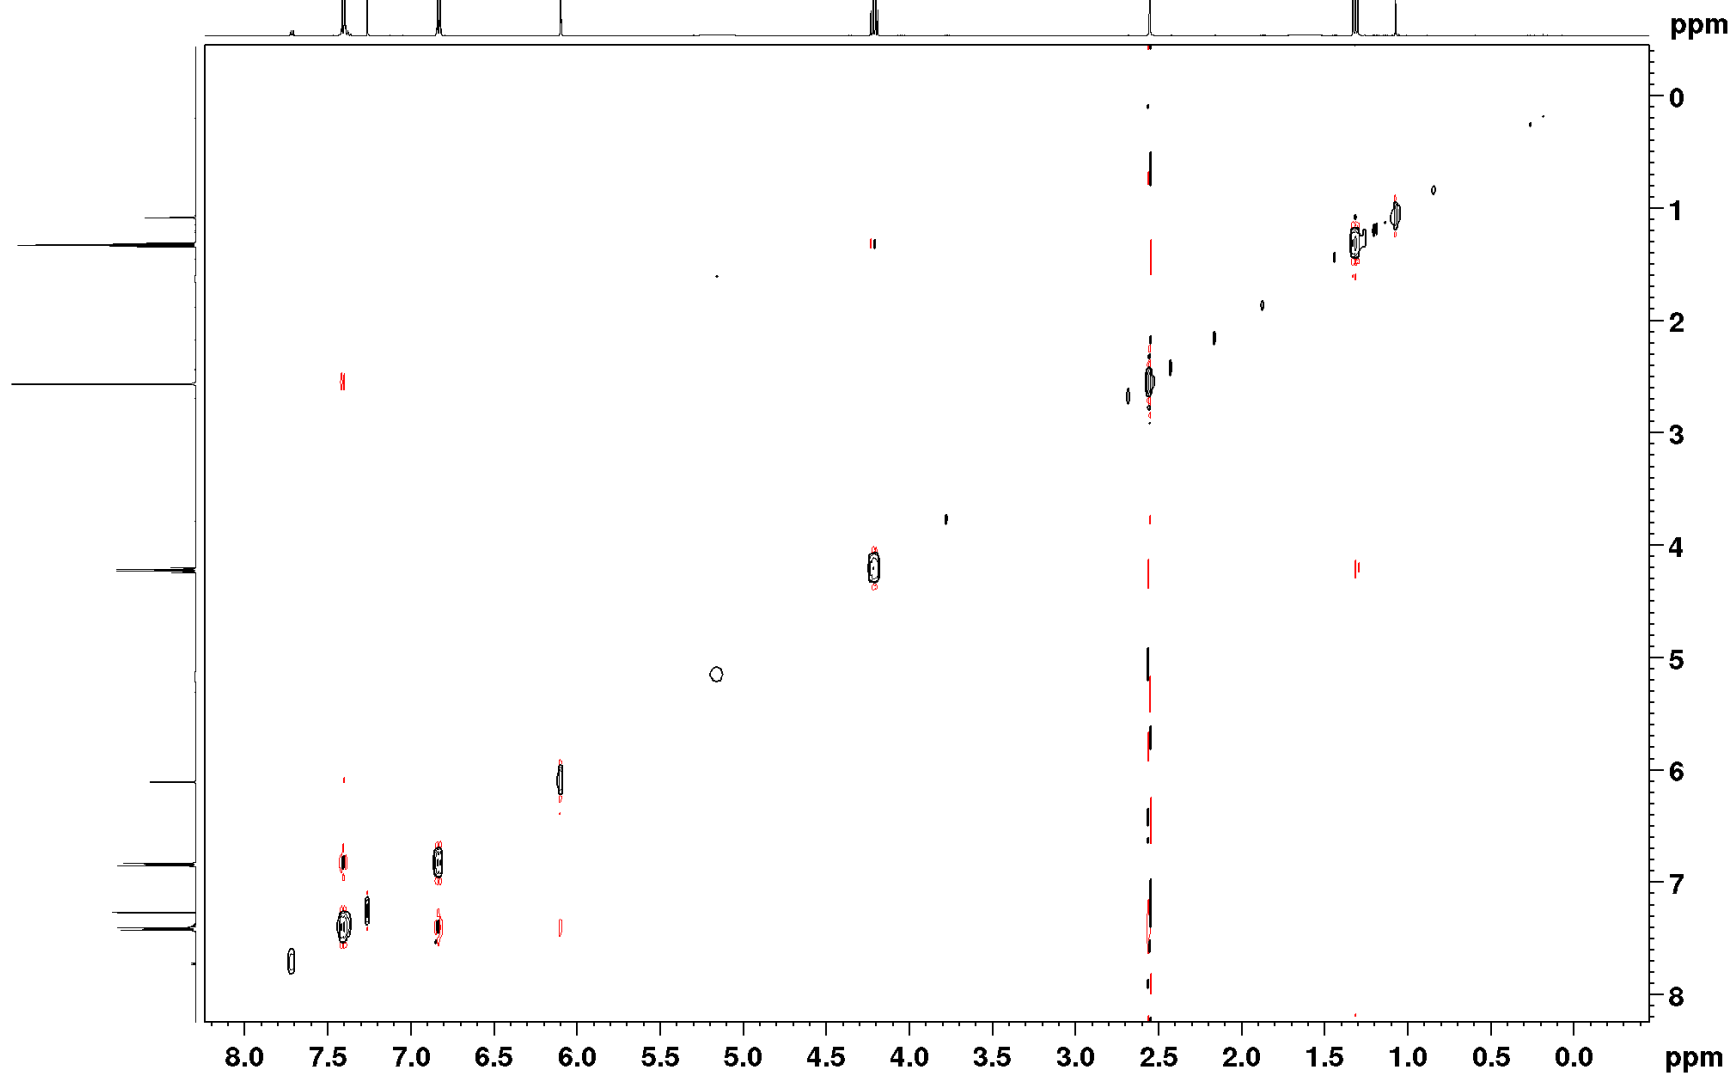

S435

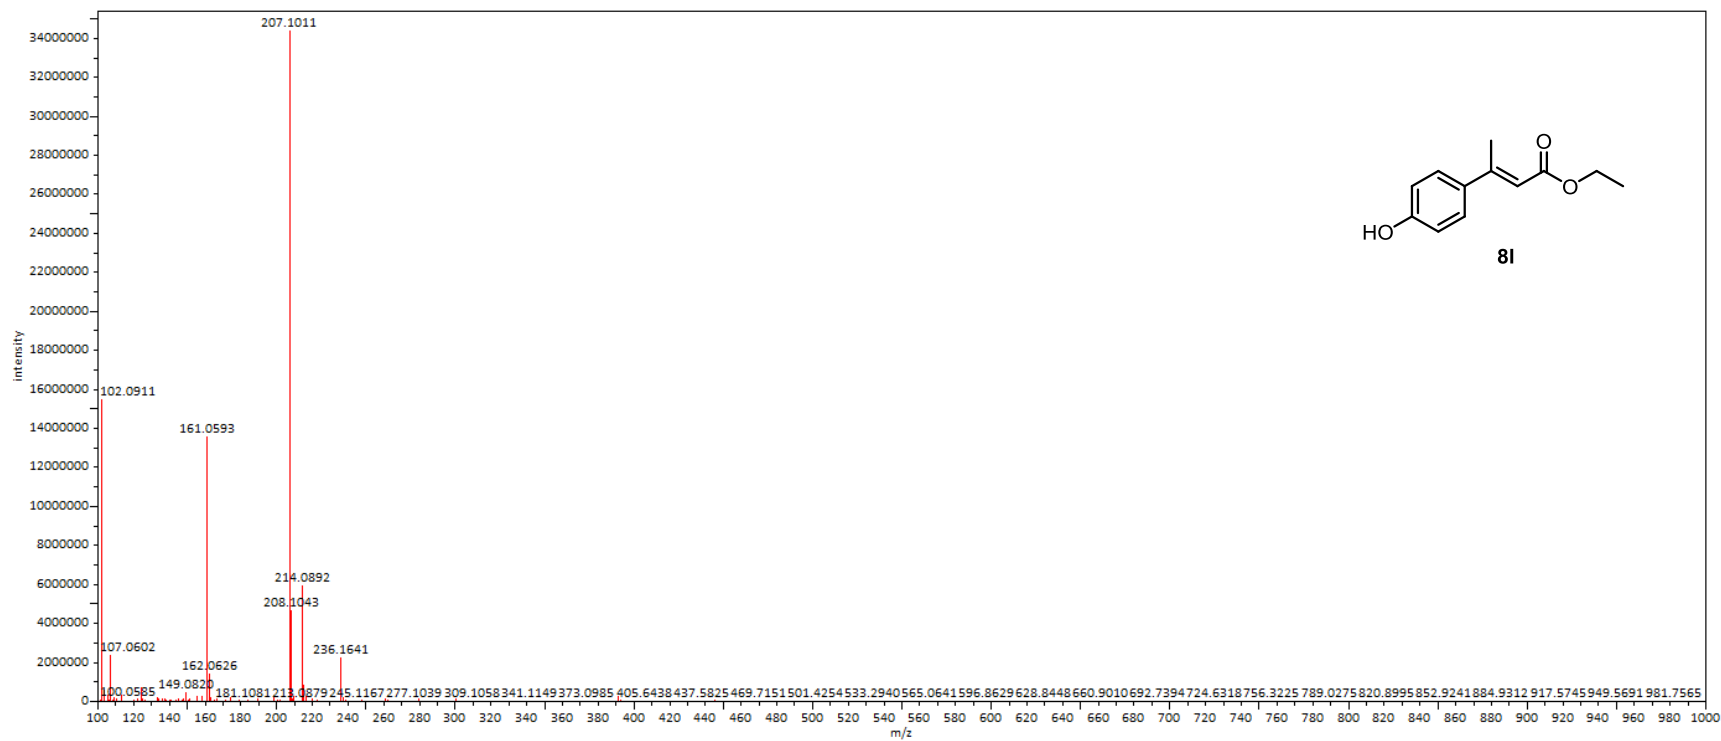



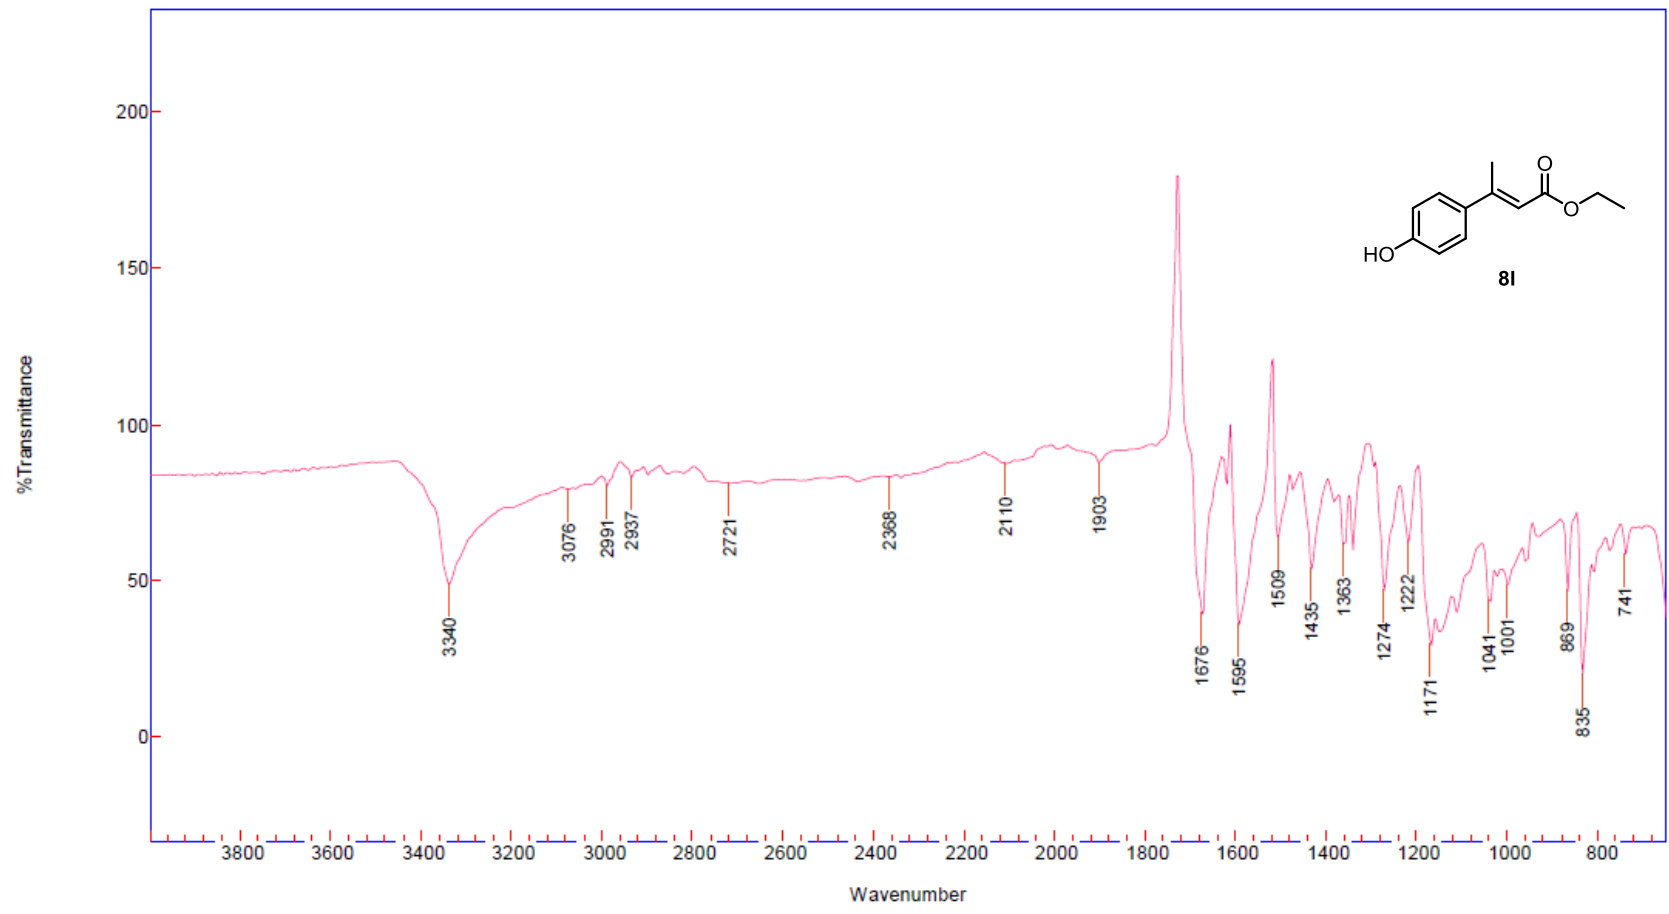

Ethyl (E)-3-(4-((tert-butyldiphenylsilyl)oxy)phenyl)but-2-enoate (8m)

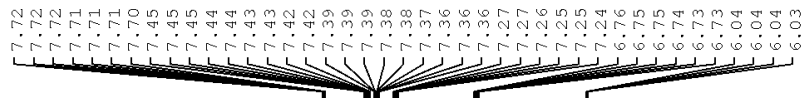

<sup>1</sup>H NMR

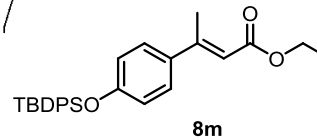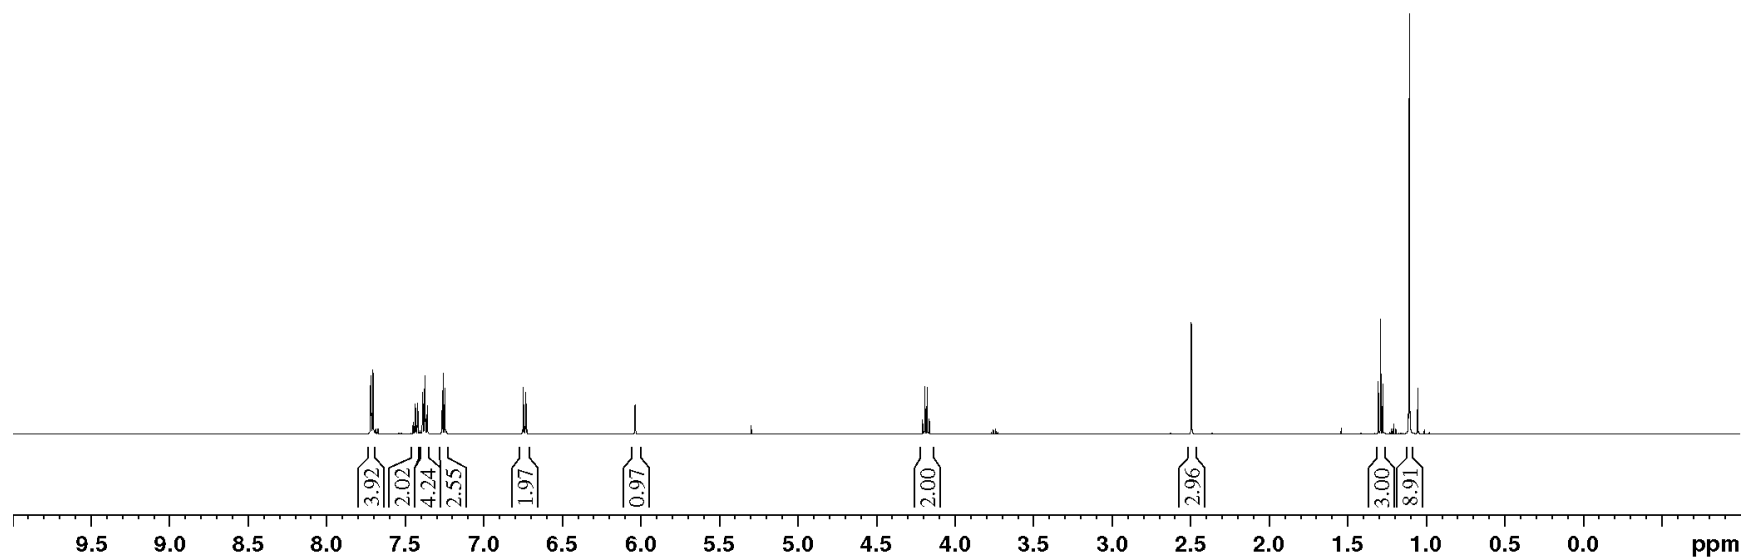

<sup>13</sup>C NMR

167.2

156.8  
155.0

135.6  
134.8  
132.8  
130.2  
128.0  
127.5

119.8  
115.5

59.8

26.6

19.6  
17.7  
14.5

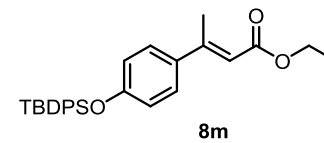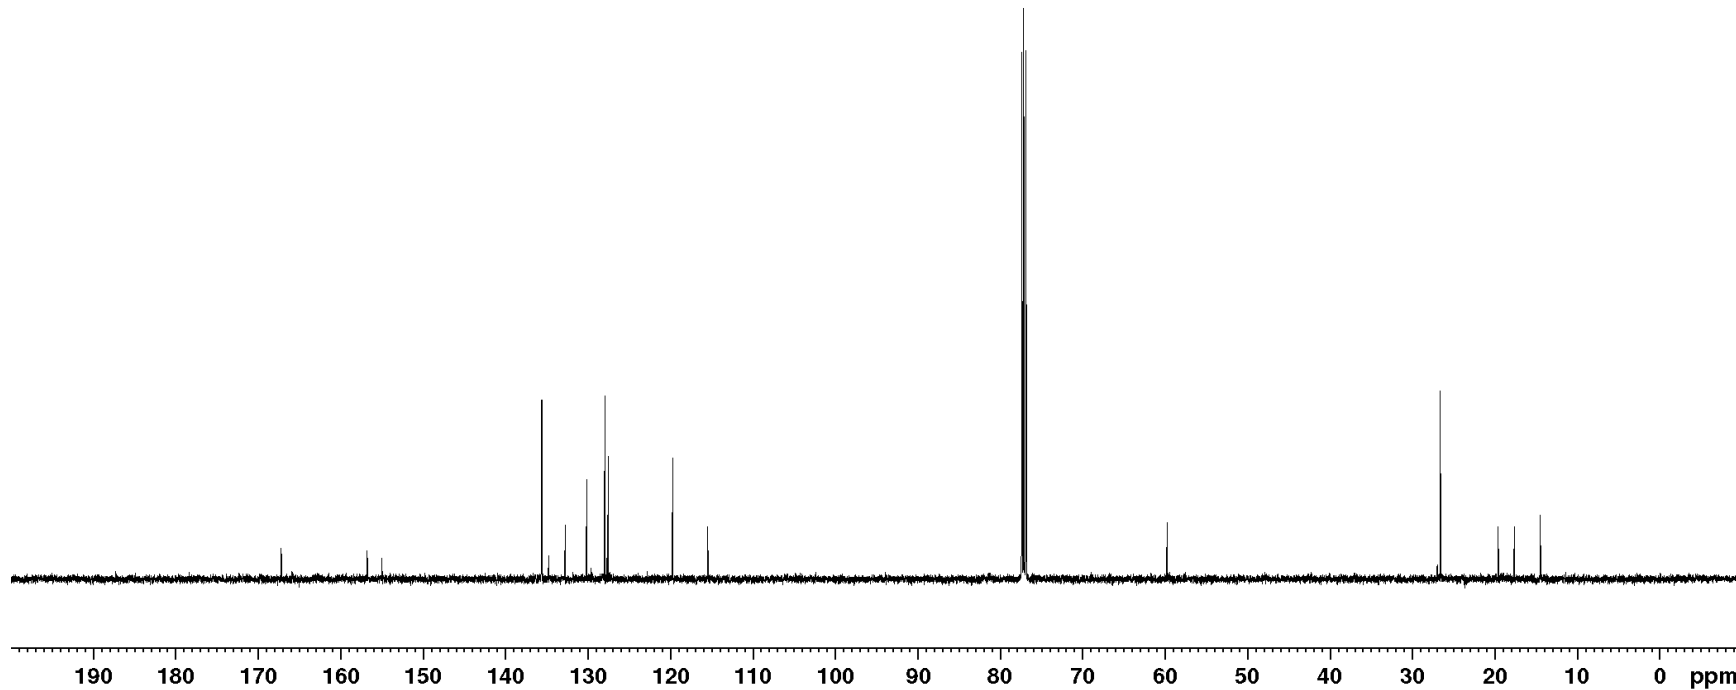

$^1\text{H}$ - $^1\text{H}$  COSY

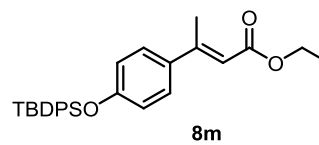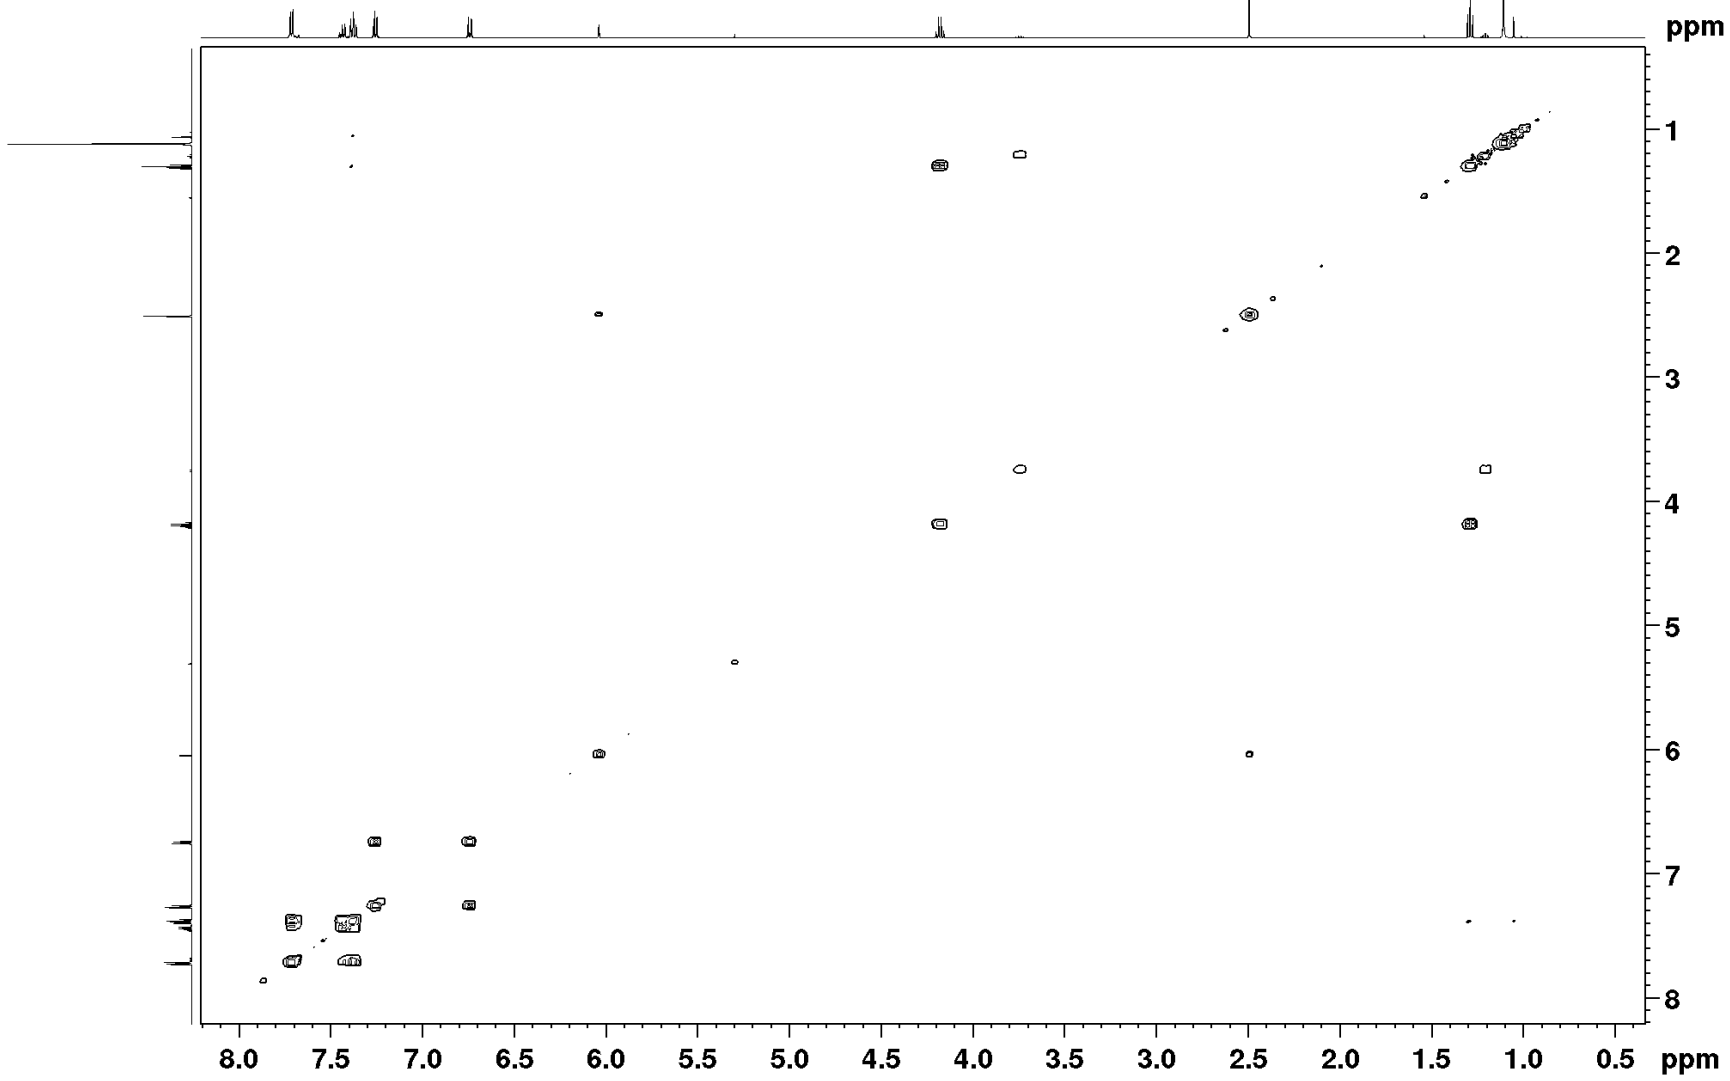

S440

$^1\text{H}$ - $^{13}\text{C}$  HSQC

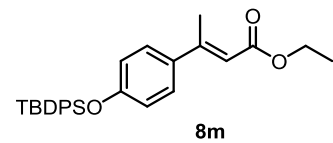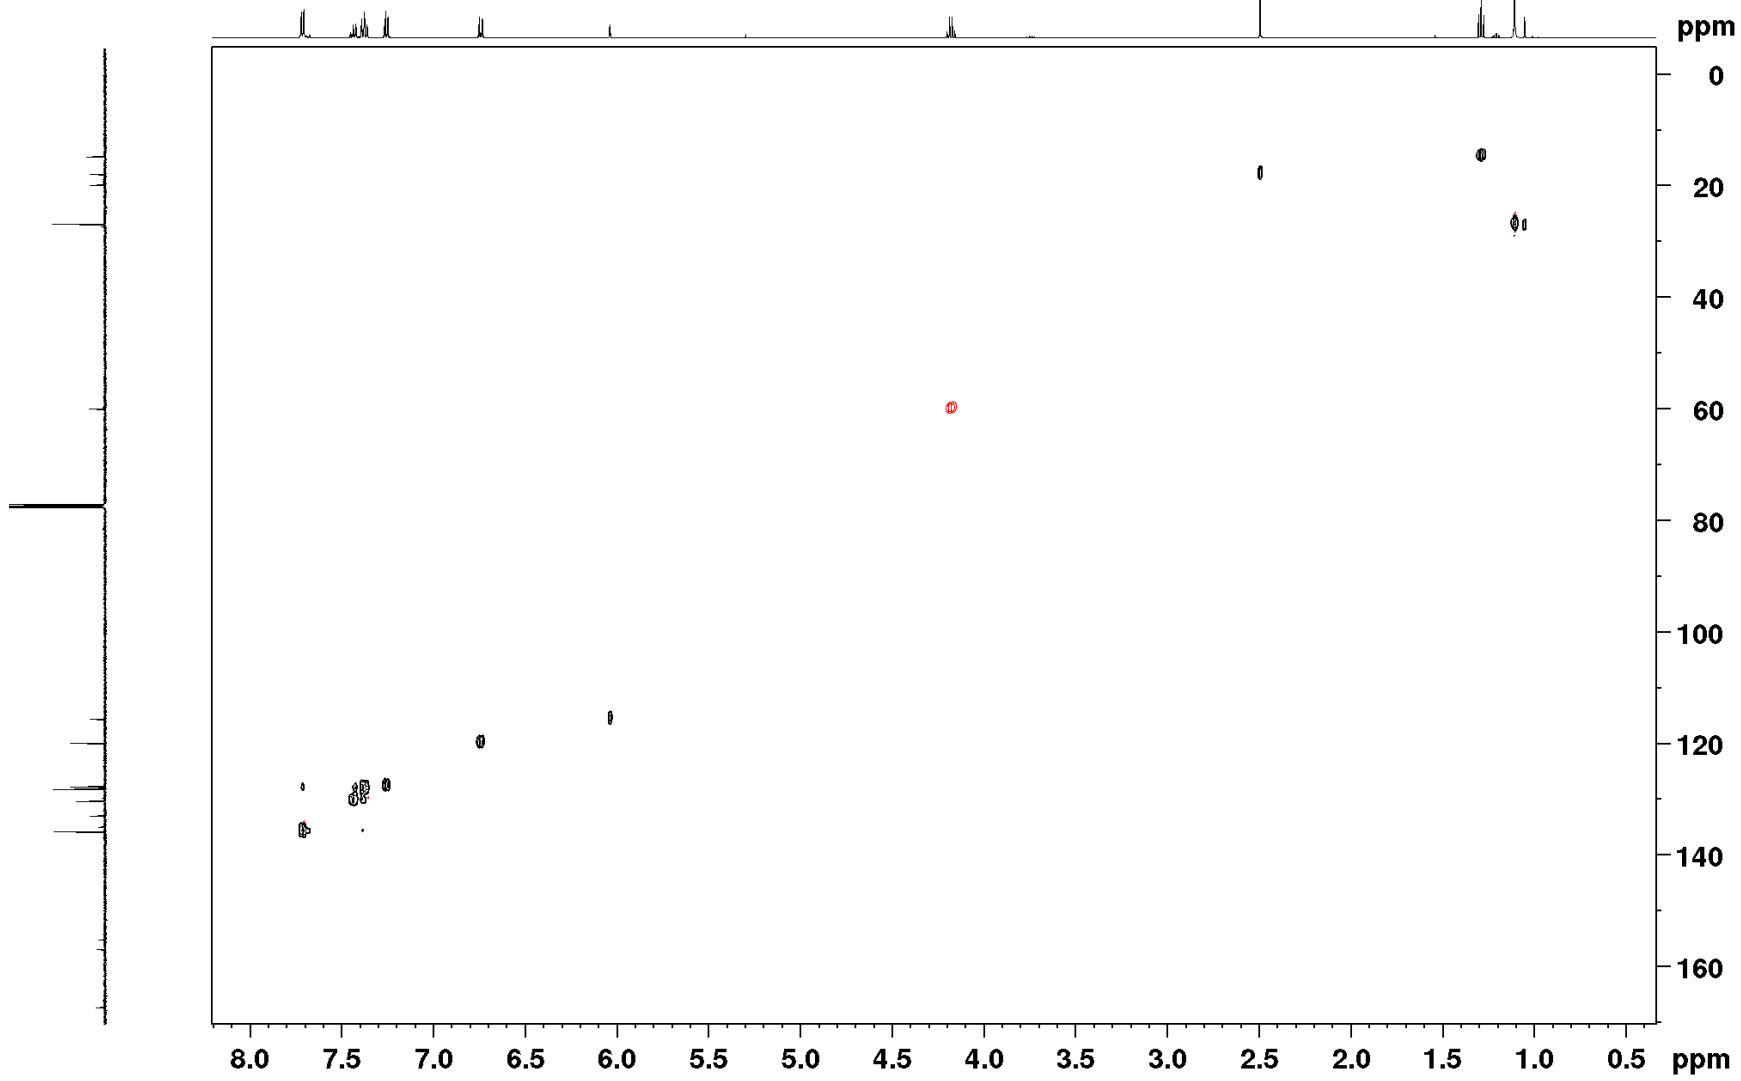

S441

$^1\text{H}$ - $^{13}\text{C}$  HMBC

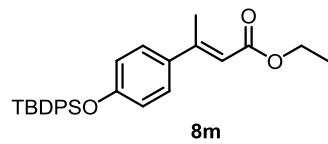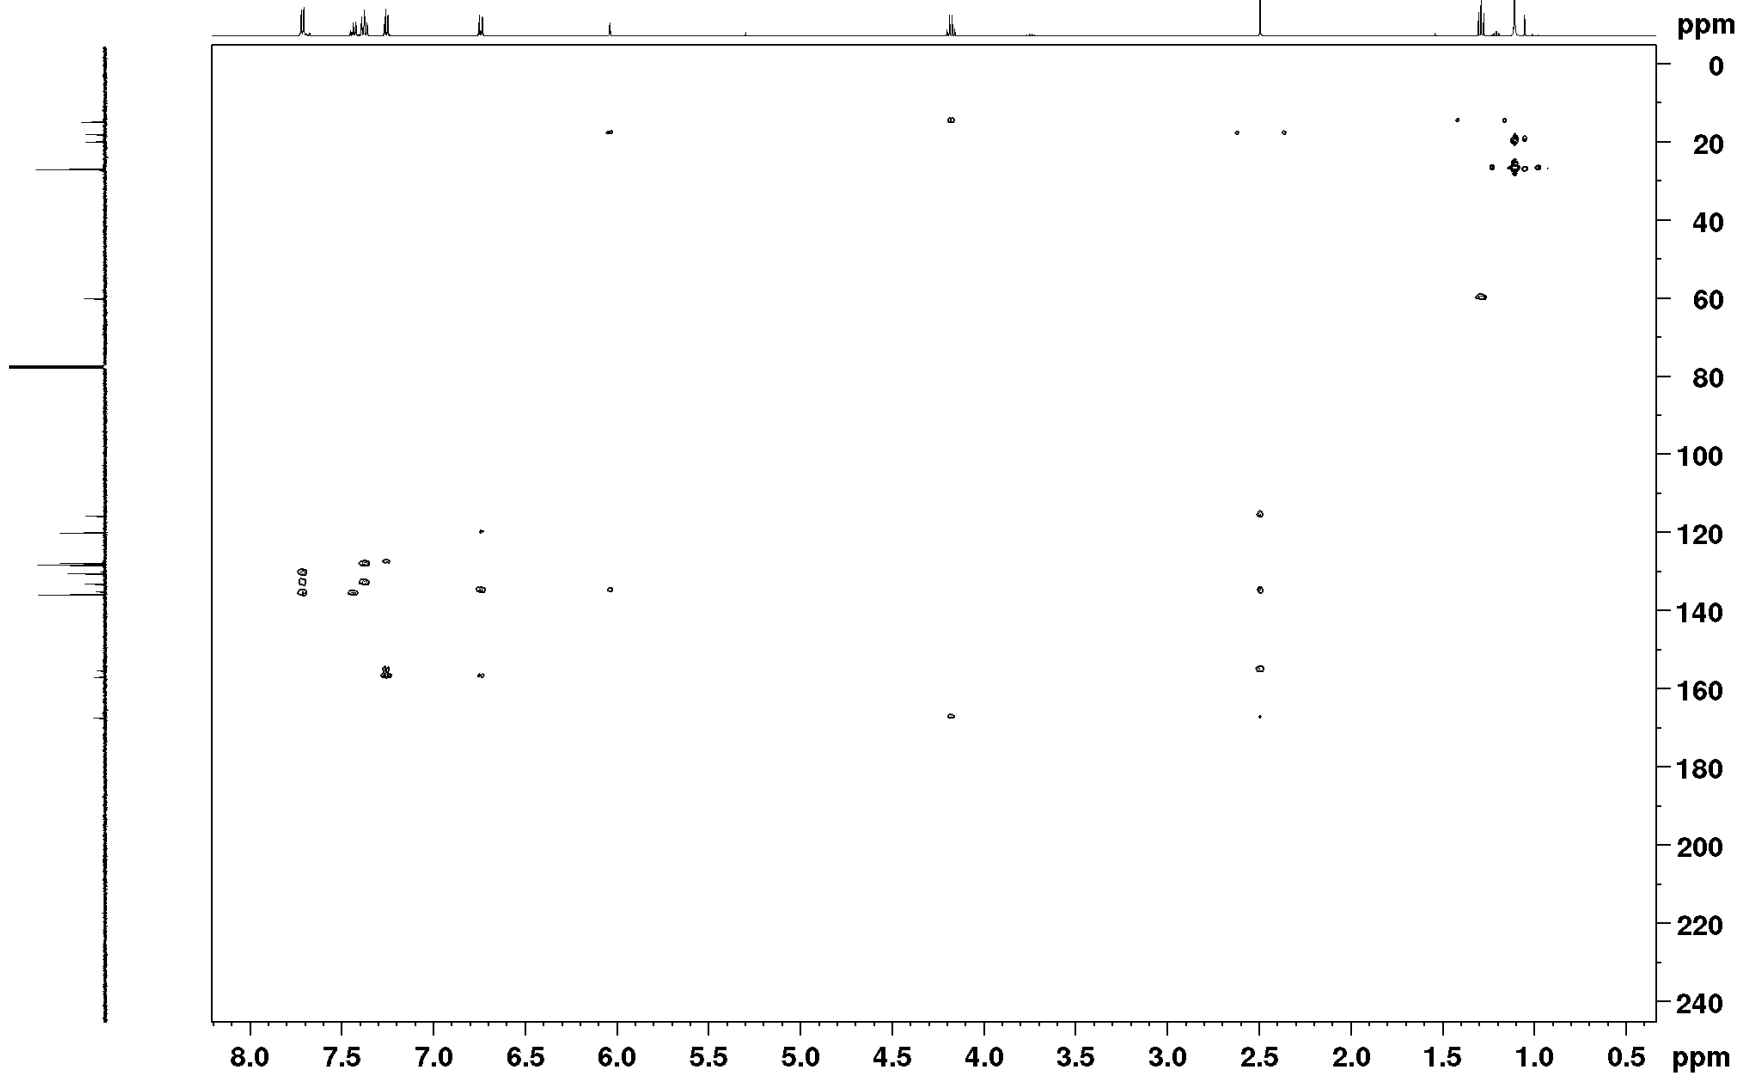

$^1\text{H}$ - $^1\text{H}$  NOESY

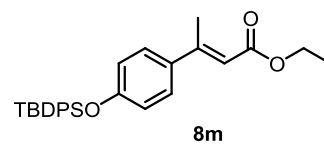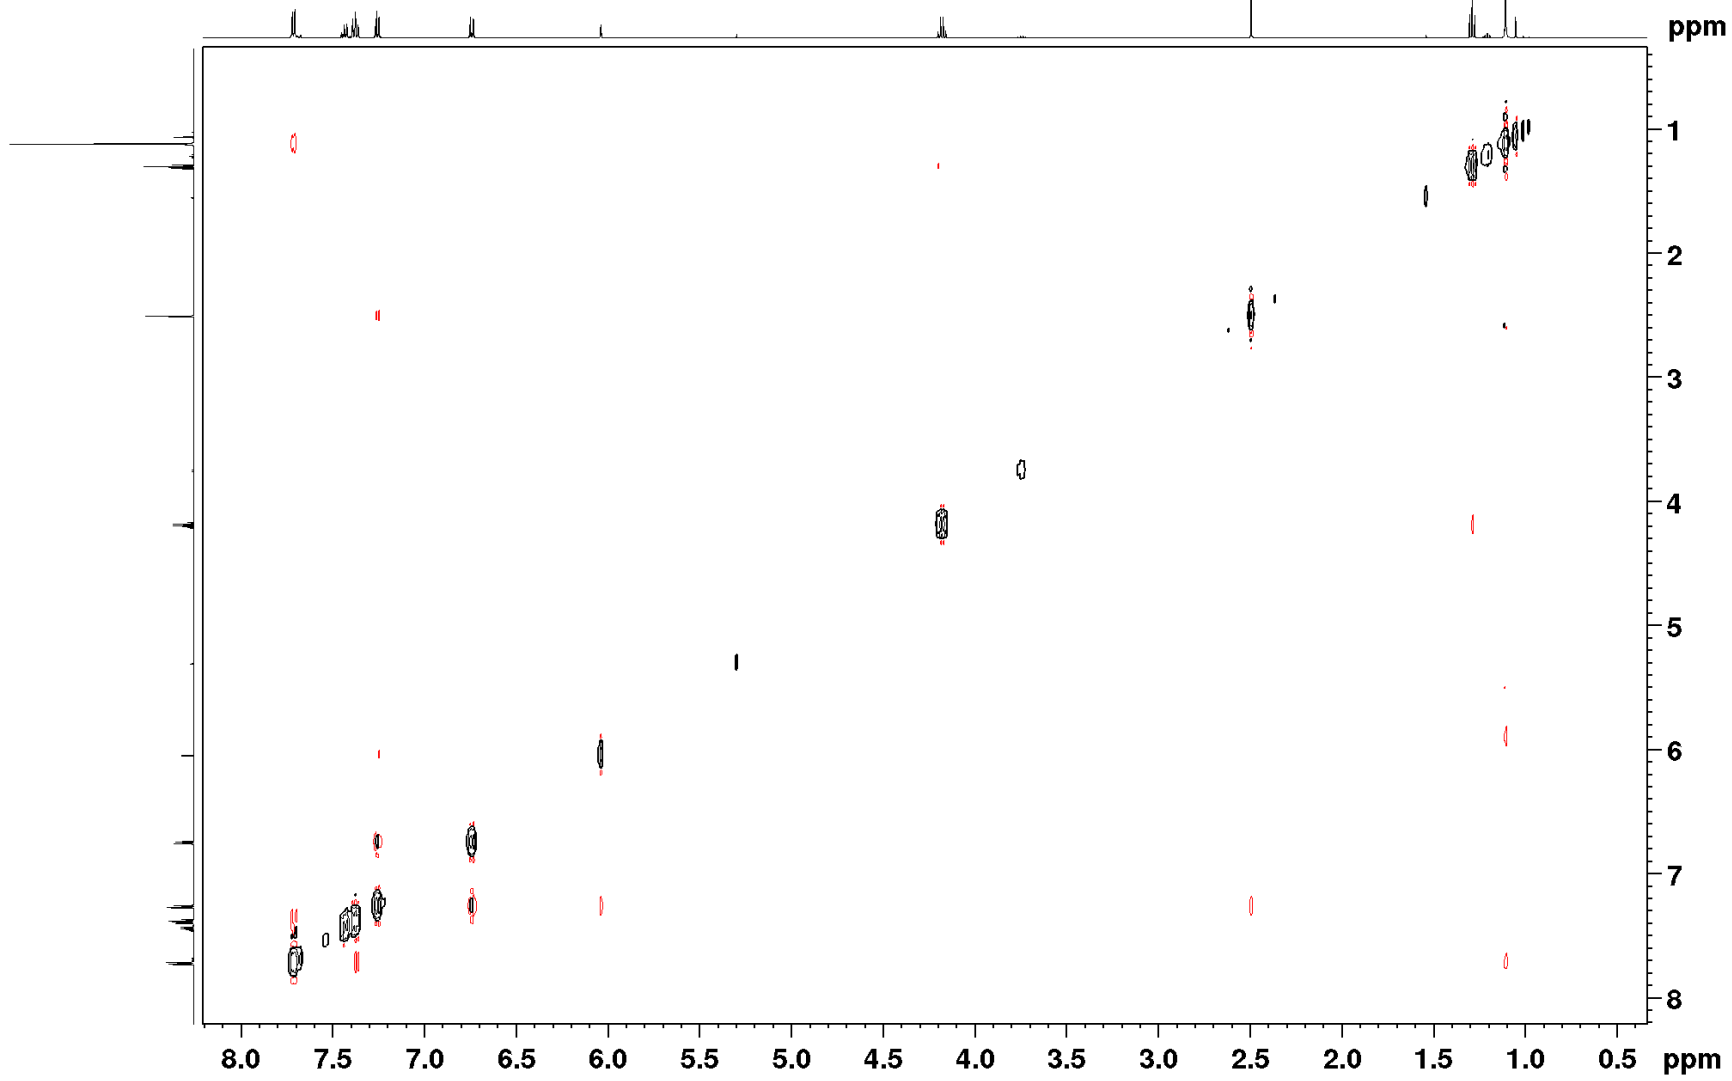

S443

$^{29}\text{Si}$  DEPT

-5.70

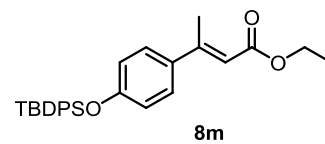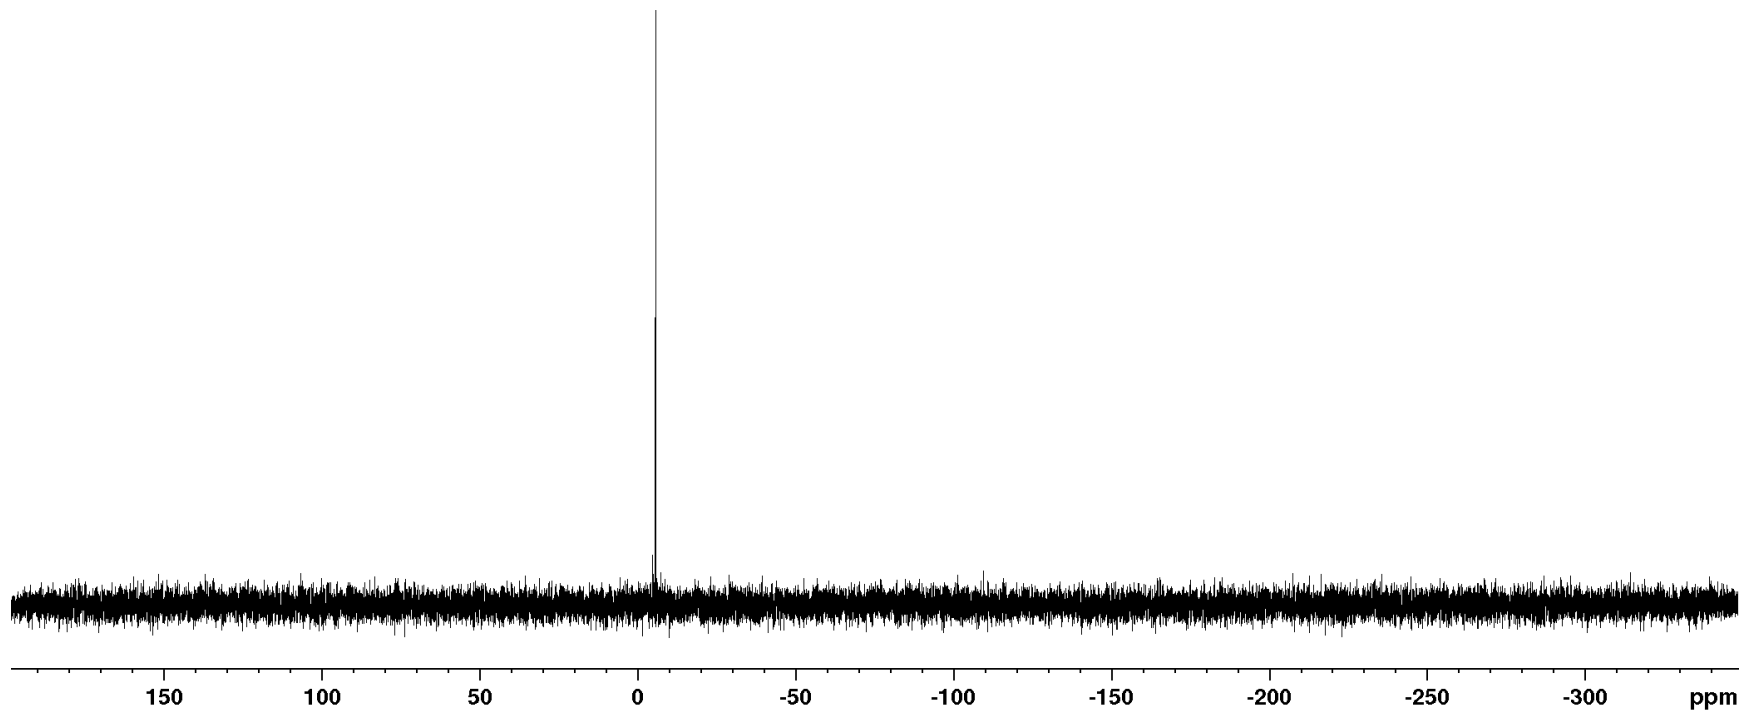

S444



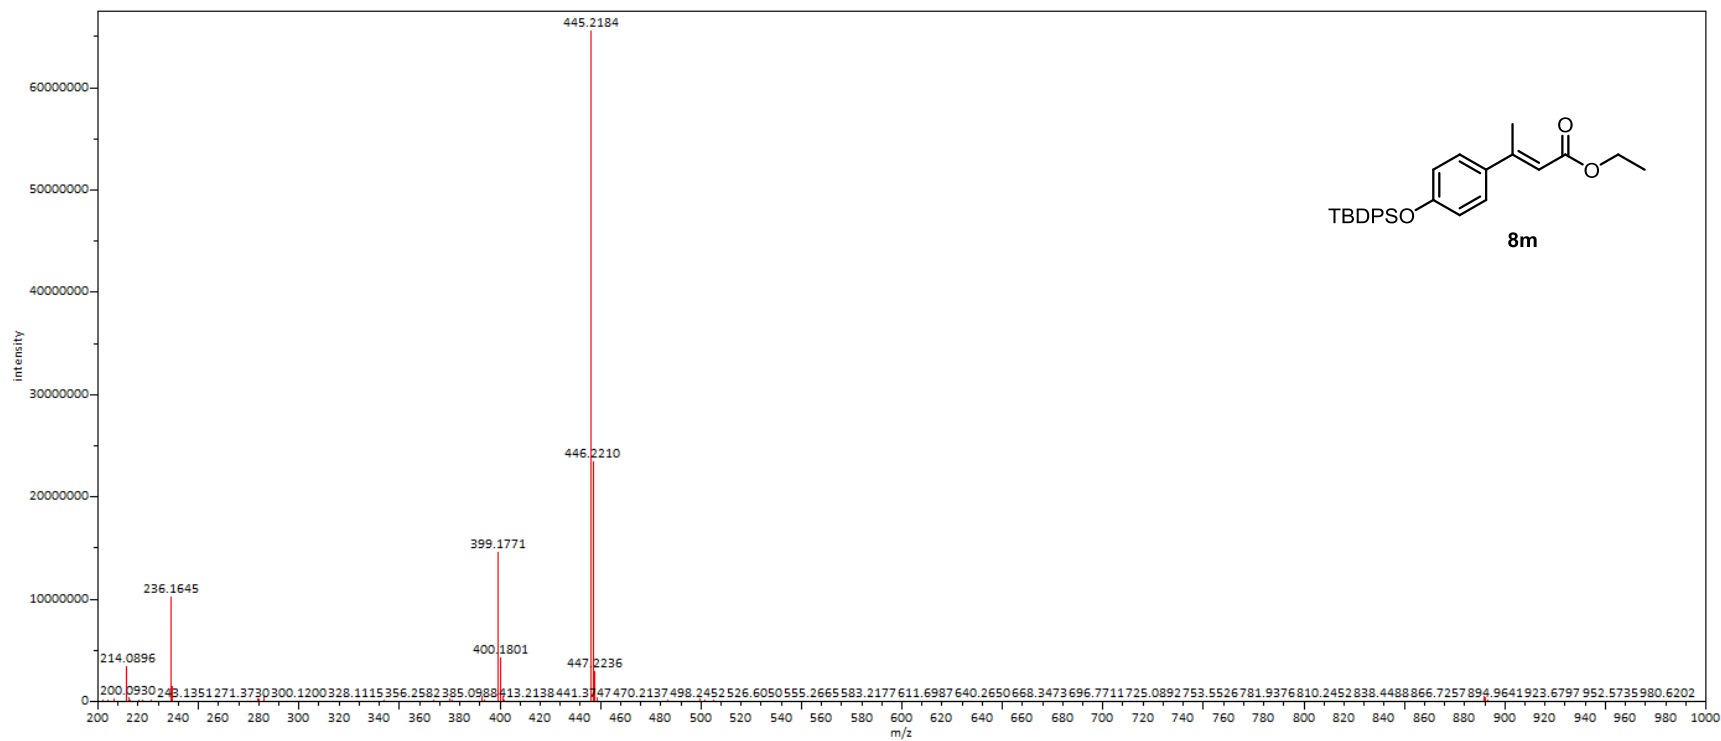

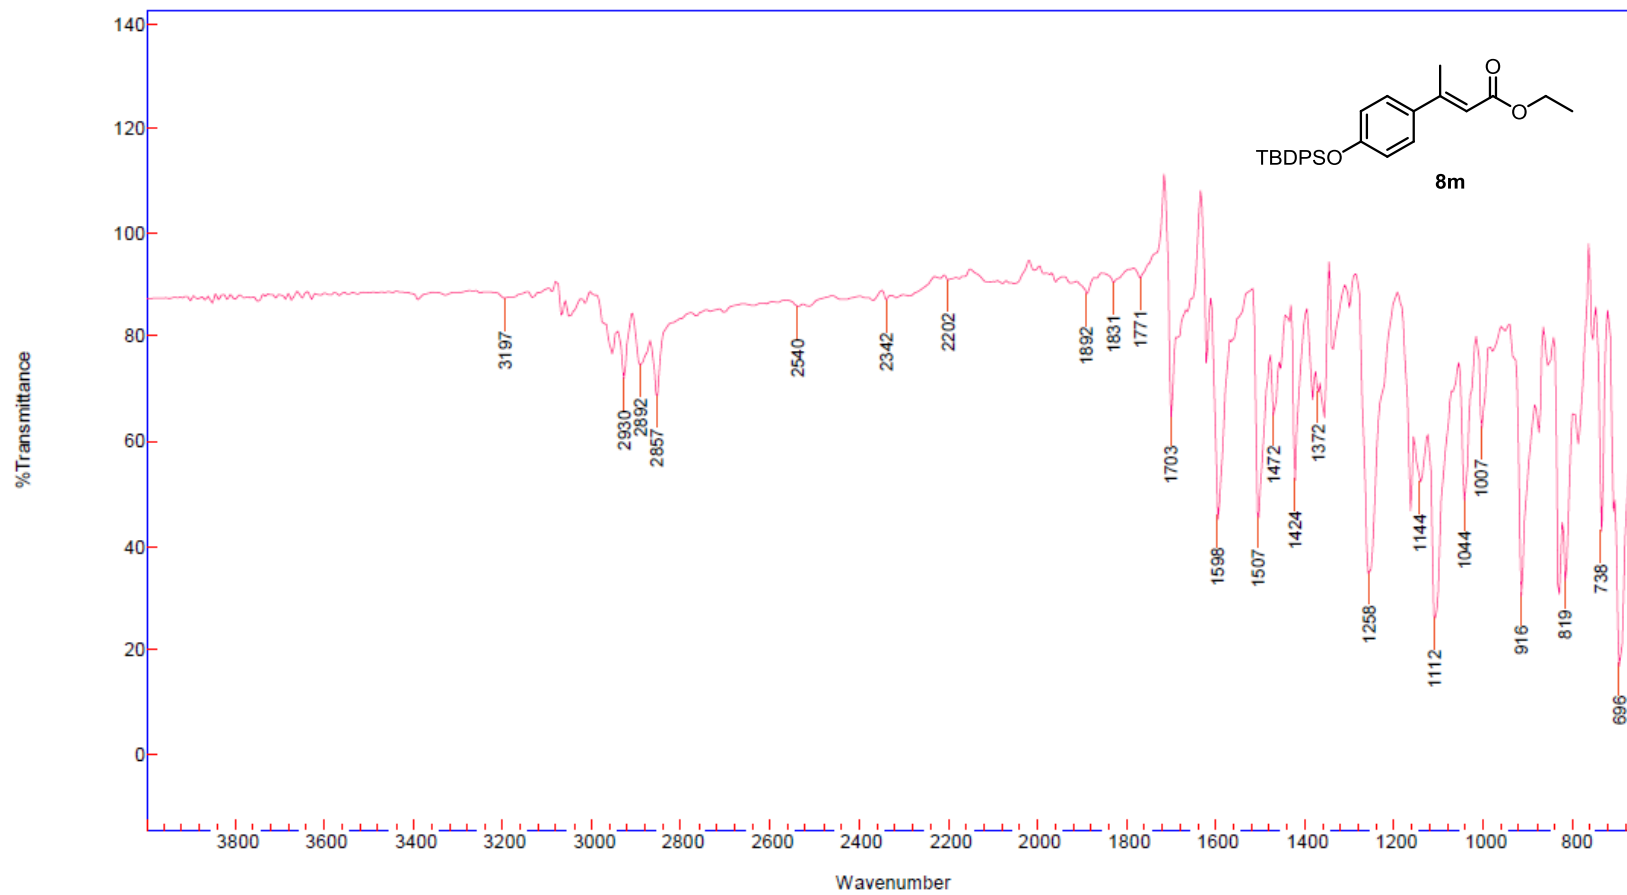

**Ethyl (*E*)-3-(thiophen-2-yl)but-2-enoate (8o)**

<sup>1</sup>H NMR

7.32  
7.31  
7.05  
7.04  
7.04  
7.03  
6.26  
6.26  
6.25  
6.25

4.23  
4.21  
4.20  
4.18

2.61  
2.61

1.33  
1.31  
1.30

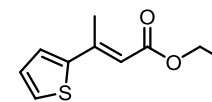

**8o**

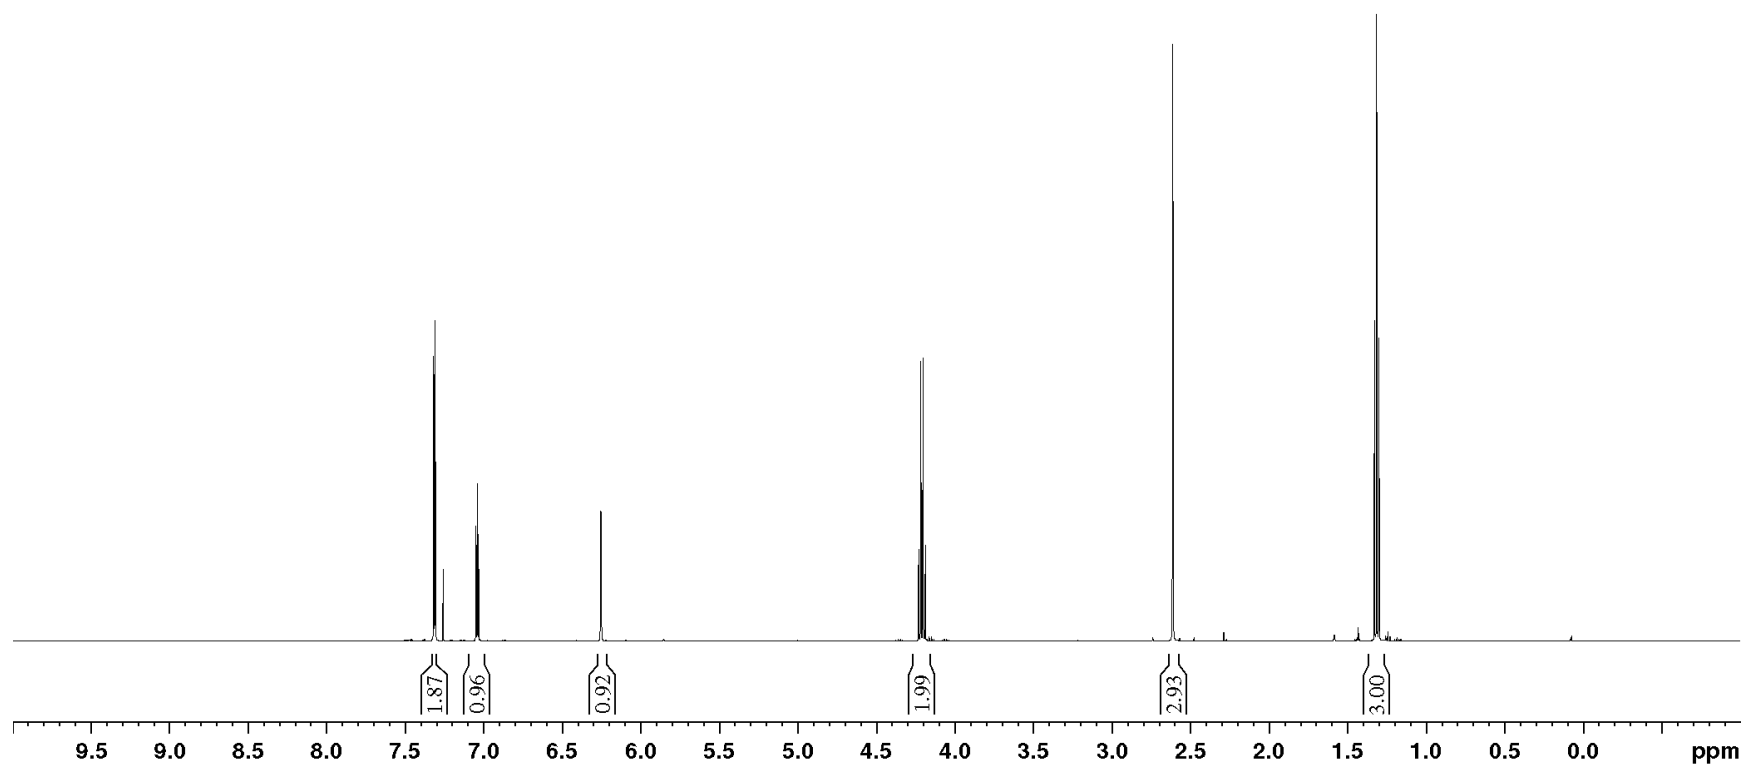

<sup>13</sup>C NMR

166.9

147.9  
145.8

128.0  
127.2  
126.8

114.5

60.0

17.4  
14.5

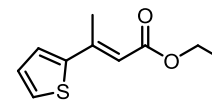

8o

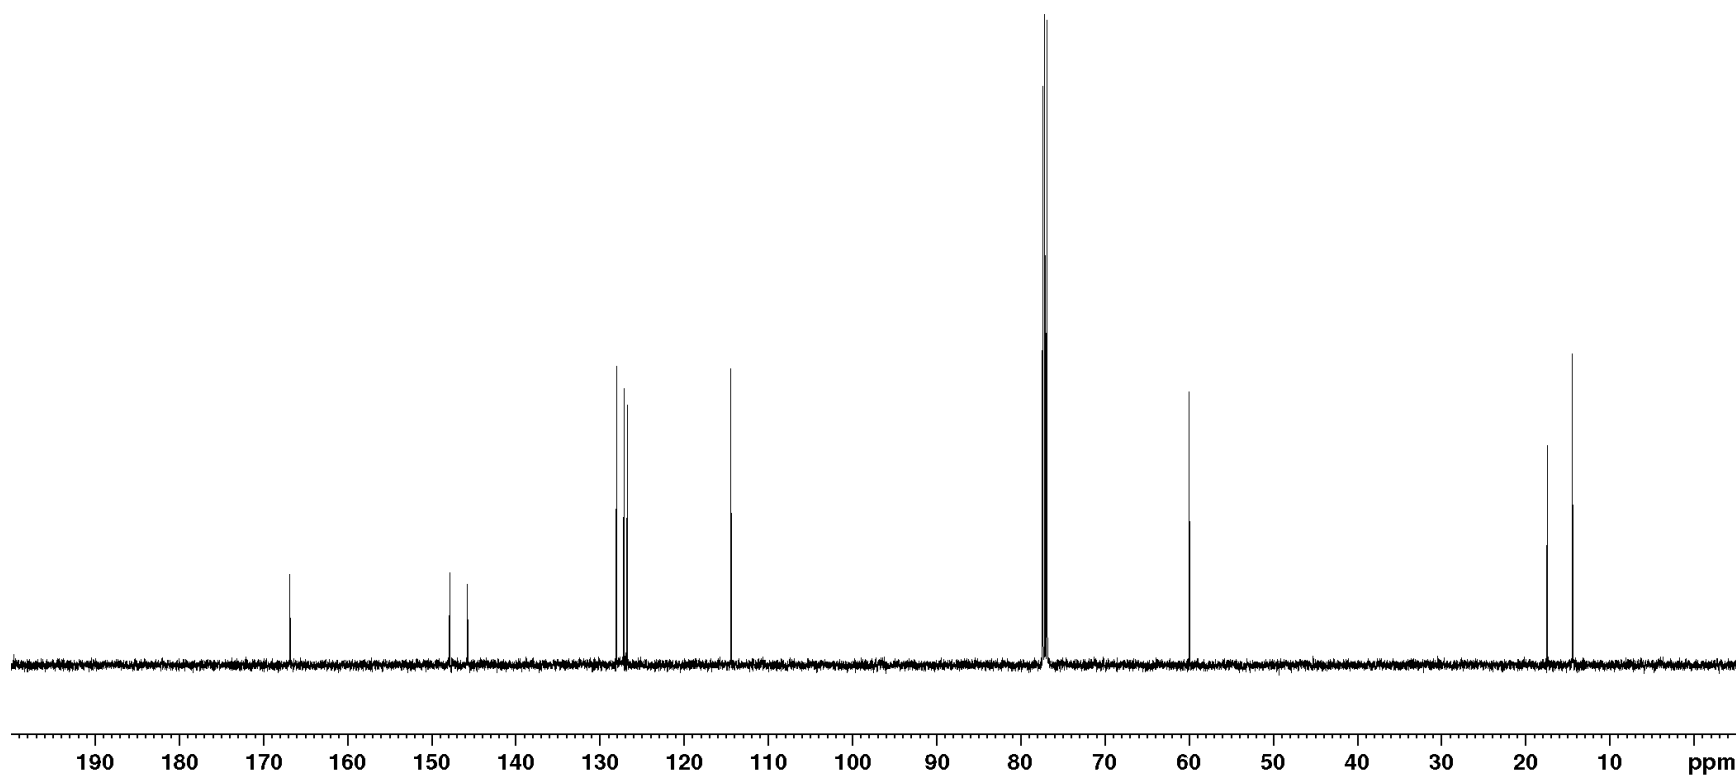

<sup>13</sup>C DEPT NMR

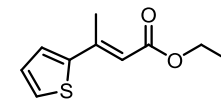

8o

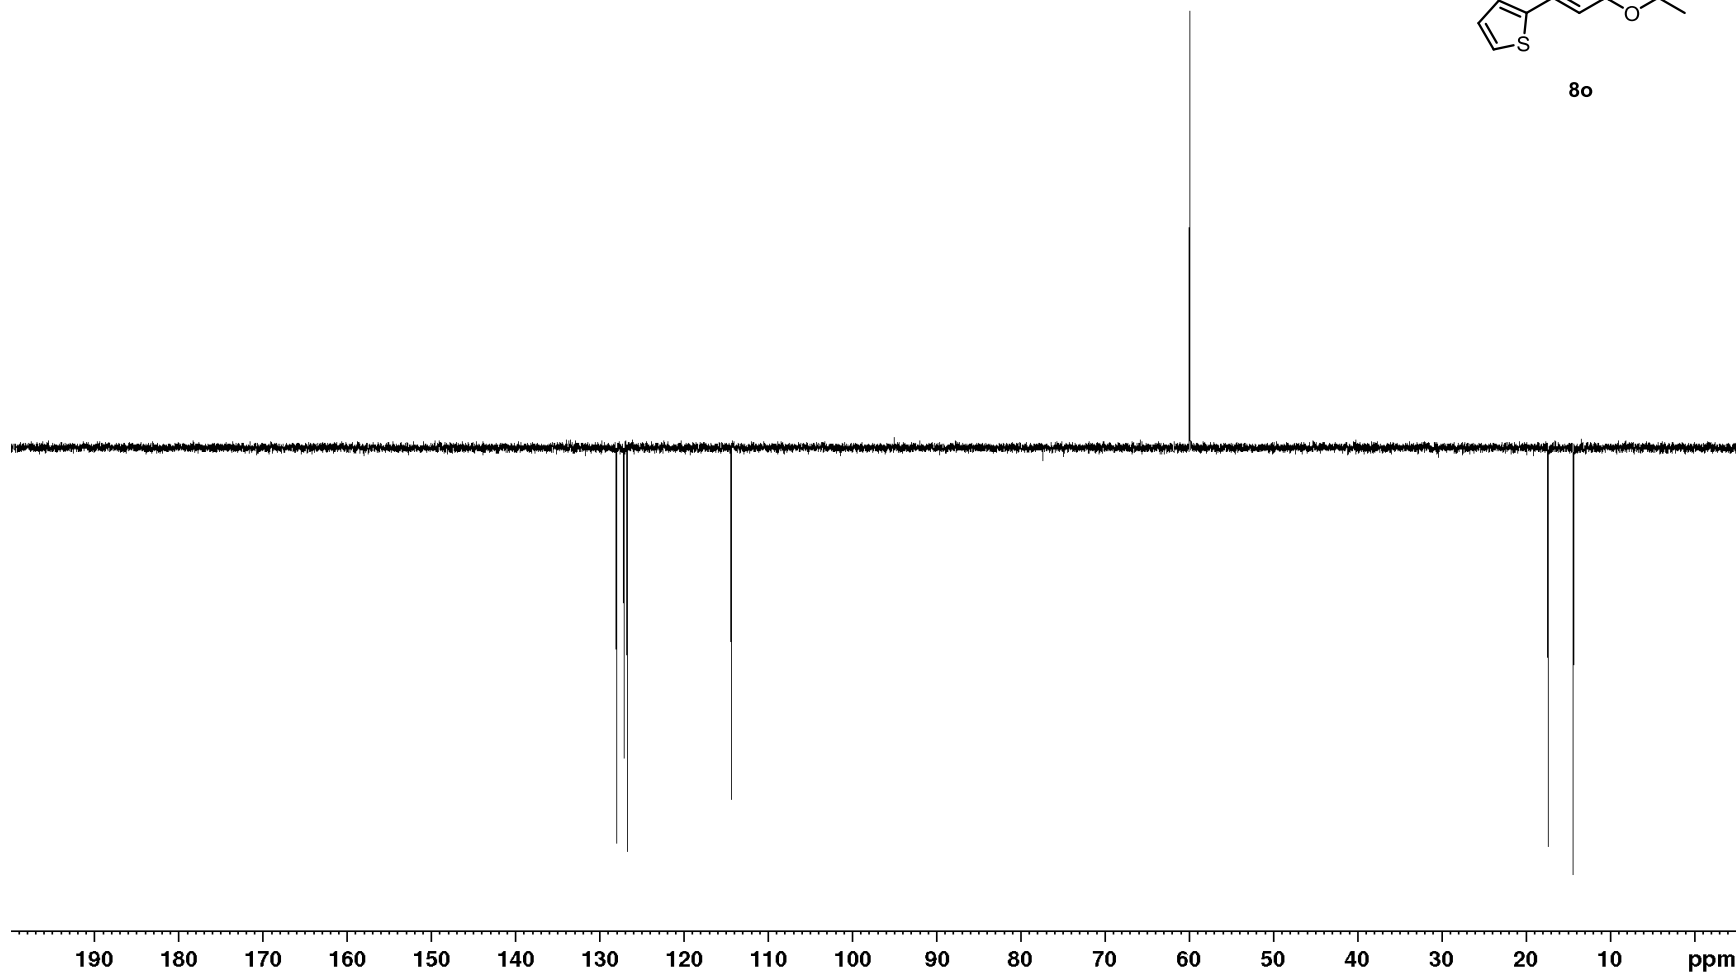

<sup>1</sup>H-<sup>1</sup>H COSY

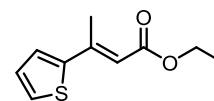

8o

ppm

1

2

3

4

5

6

7

8

ppm

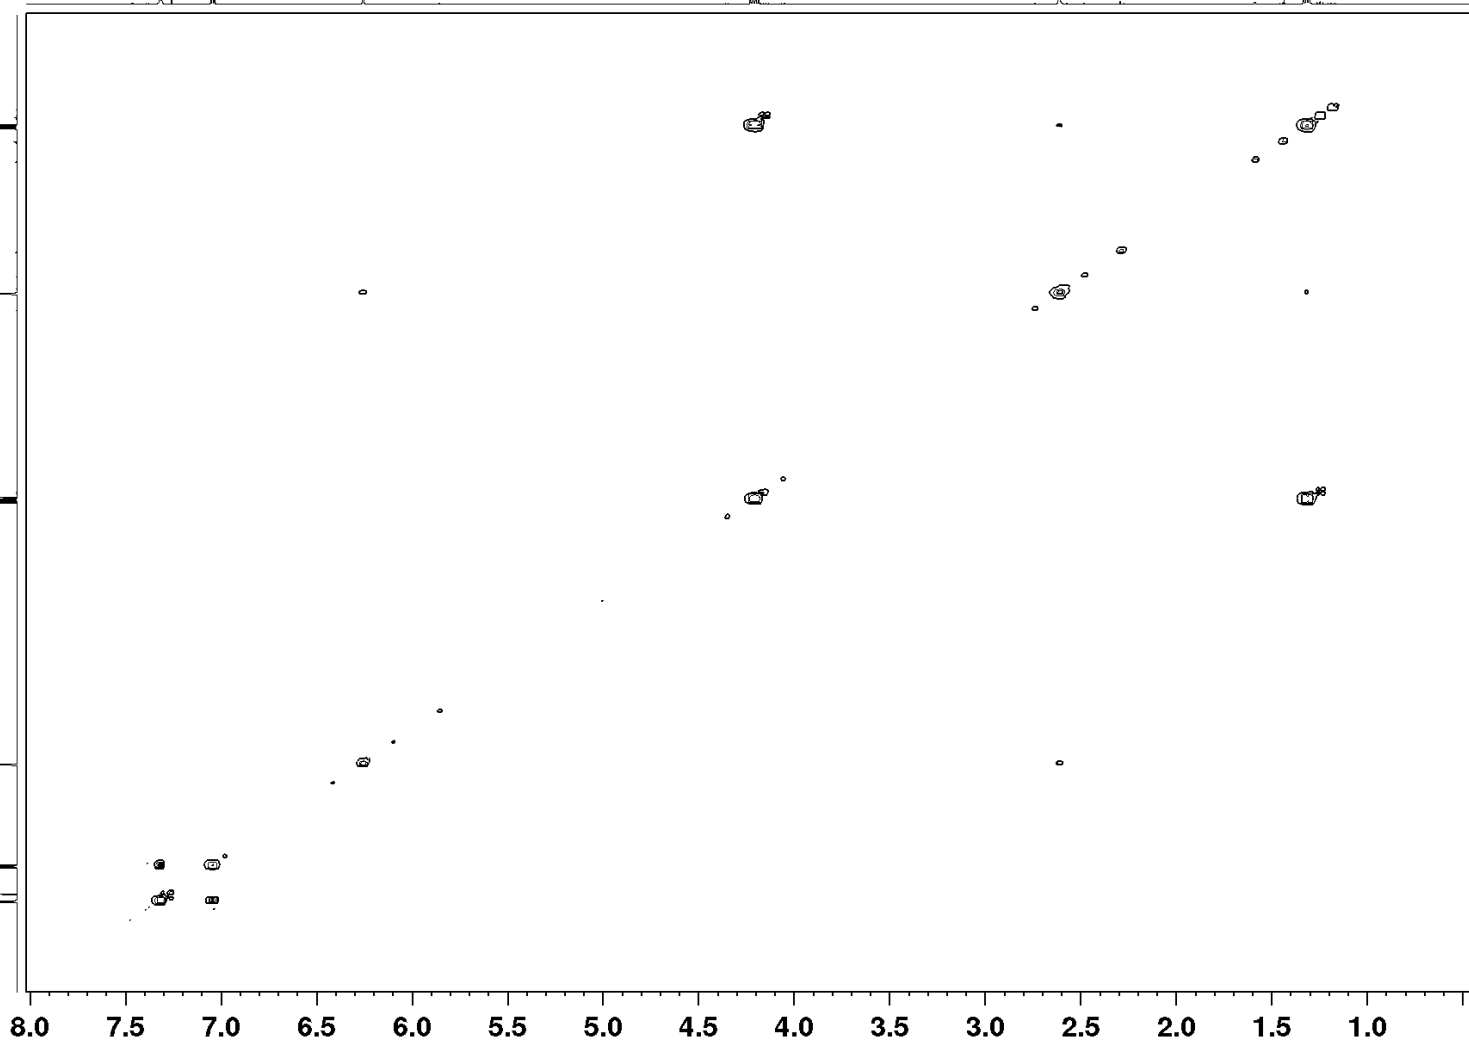

S450

$^1\text{H}$ - $^{13}\text{C}$  HMQC

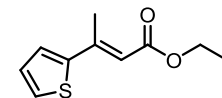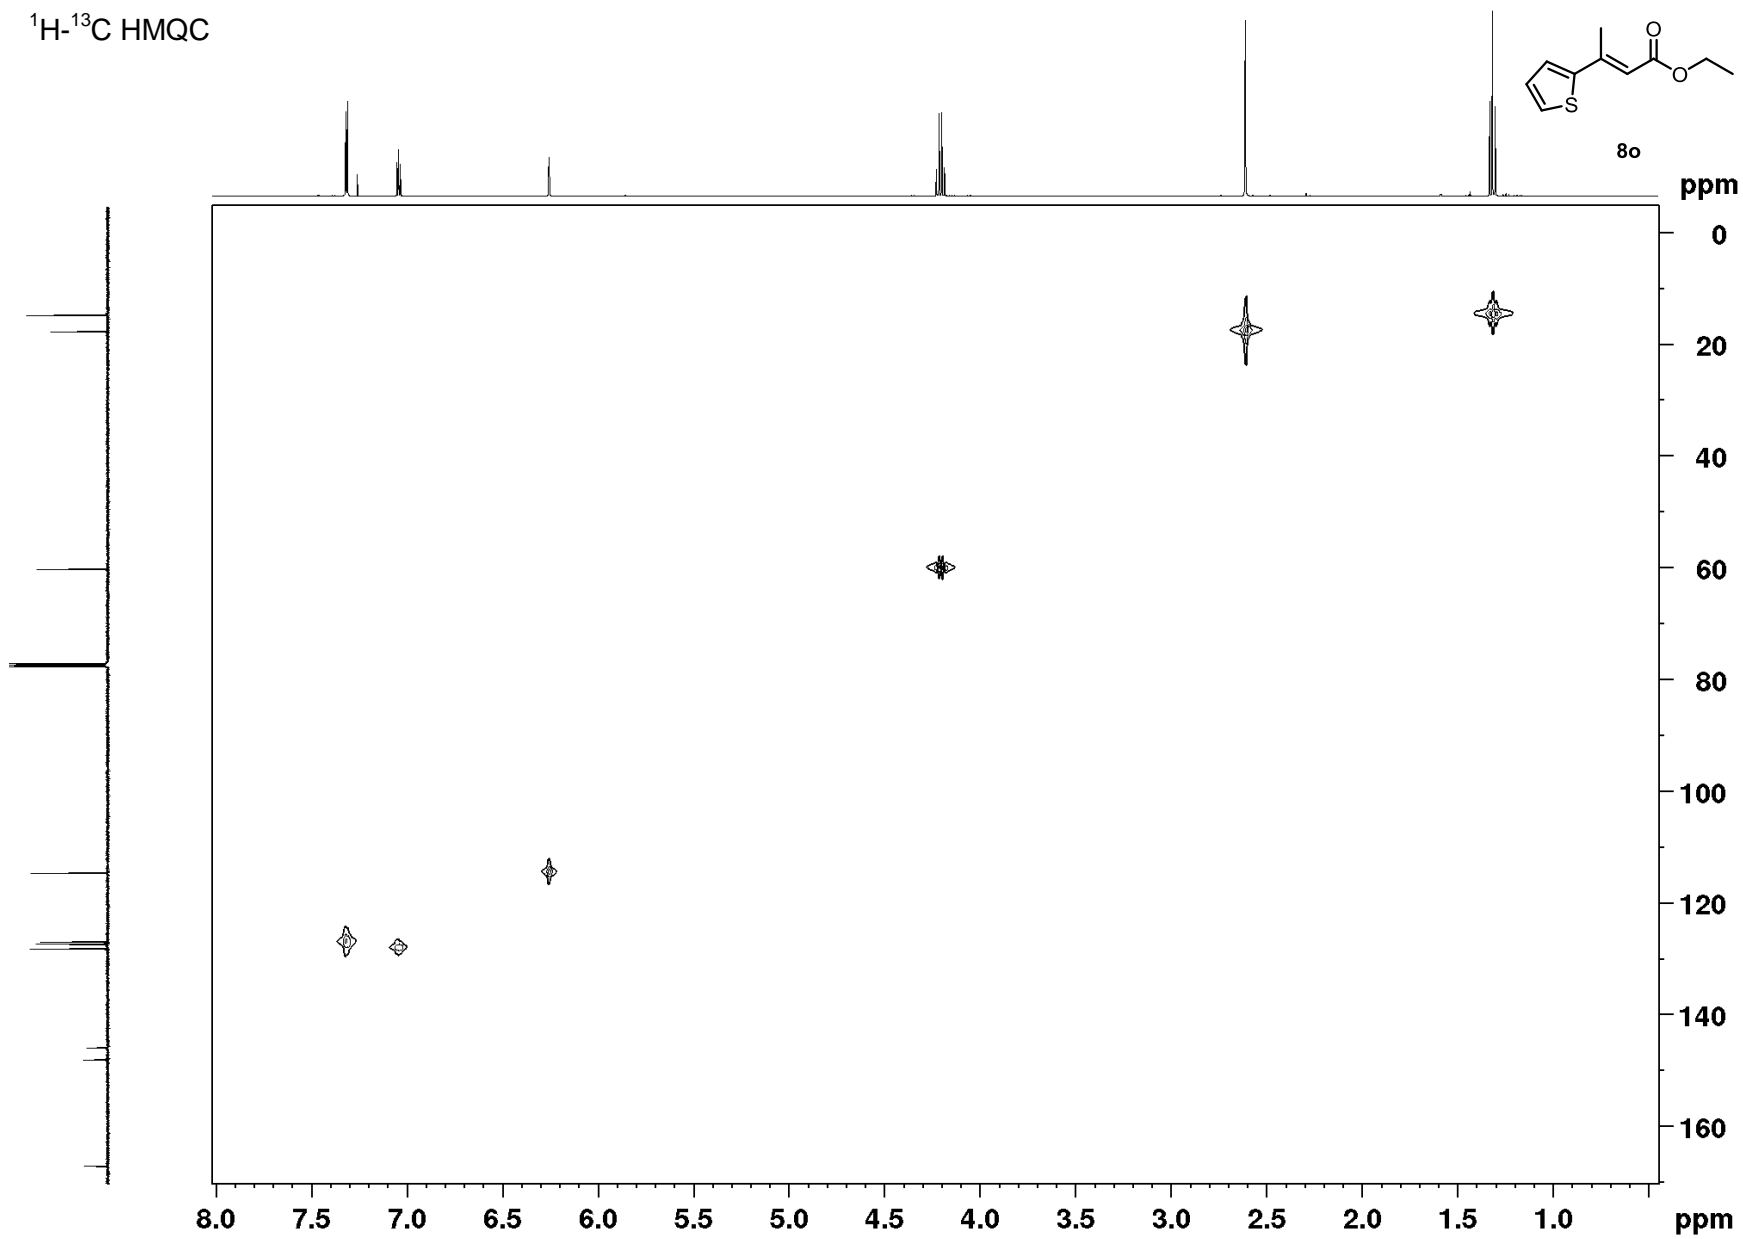

S451

$^1\text{H}$ - $^{13}\text{C}$  HMBC

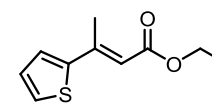

8o

ppm

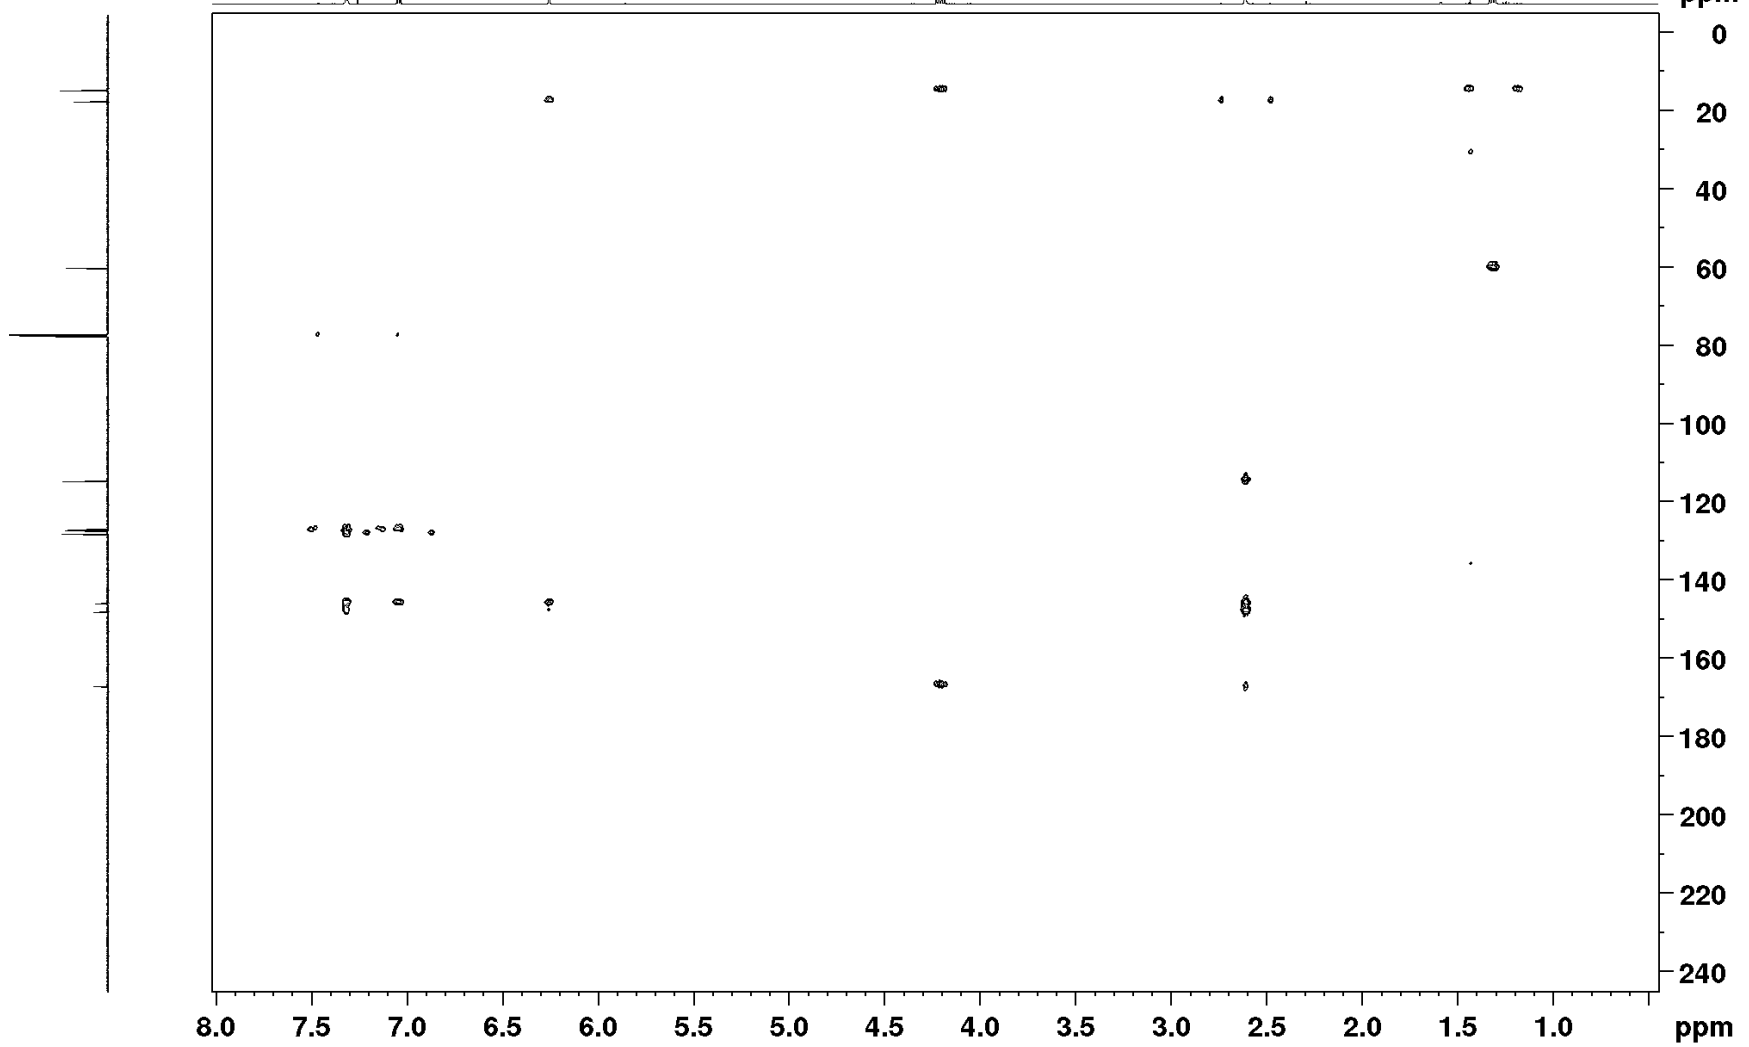



$^1\text{H}$ - $^1\text{H}$  NOESY

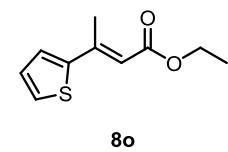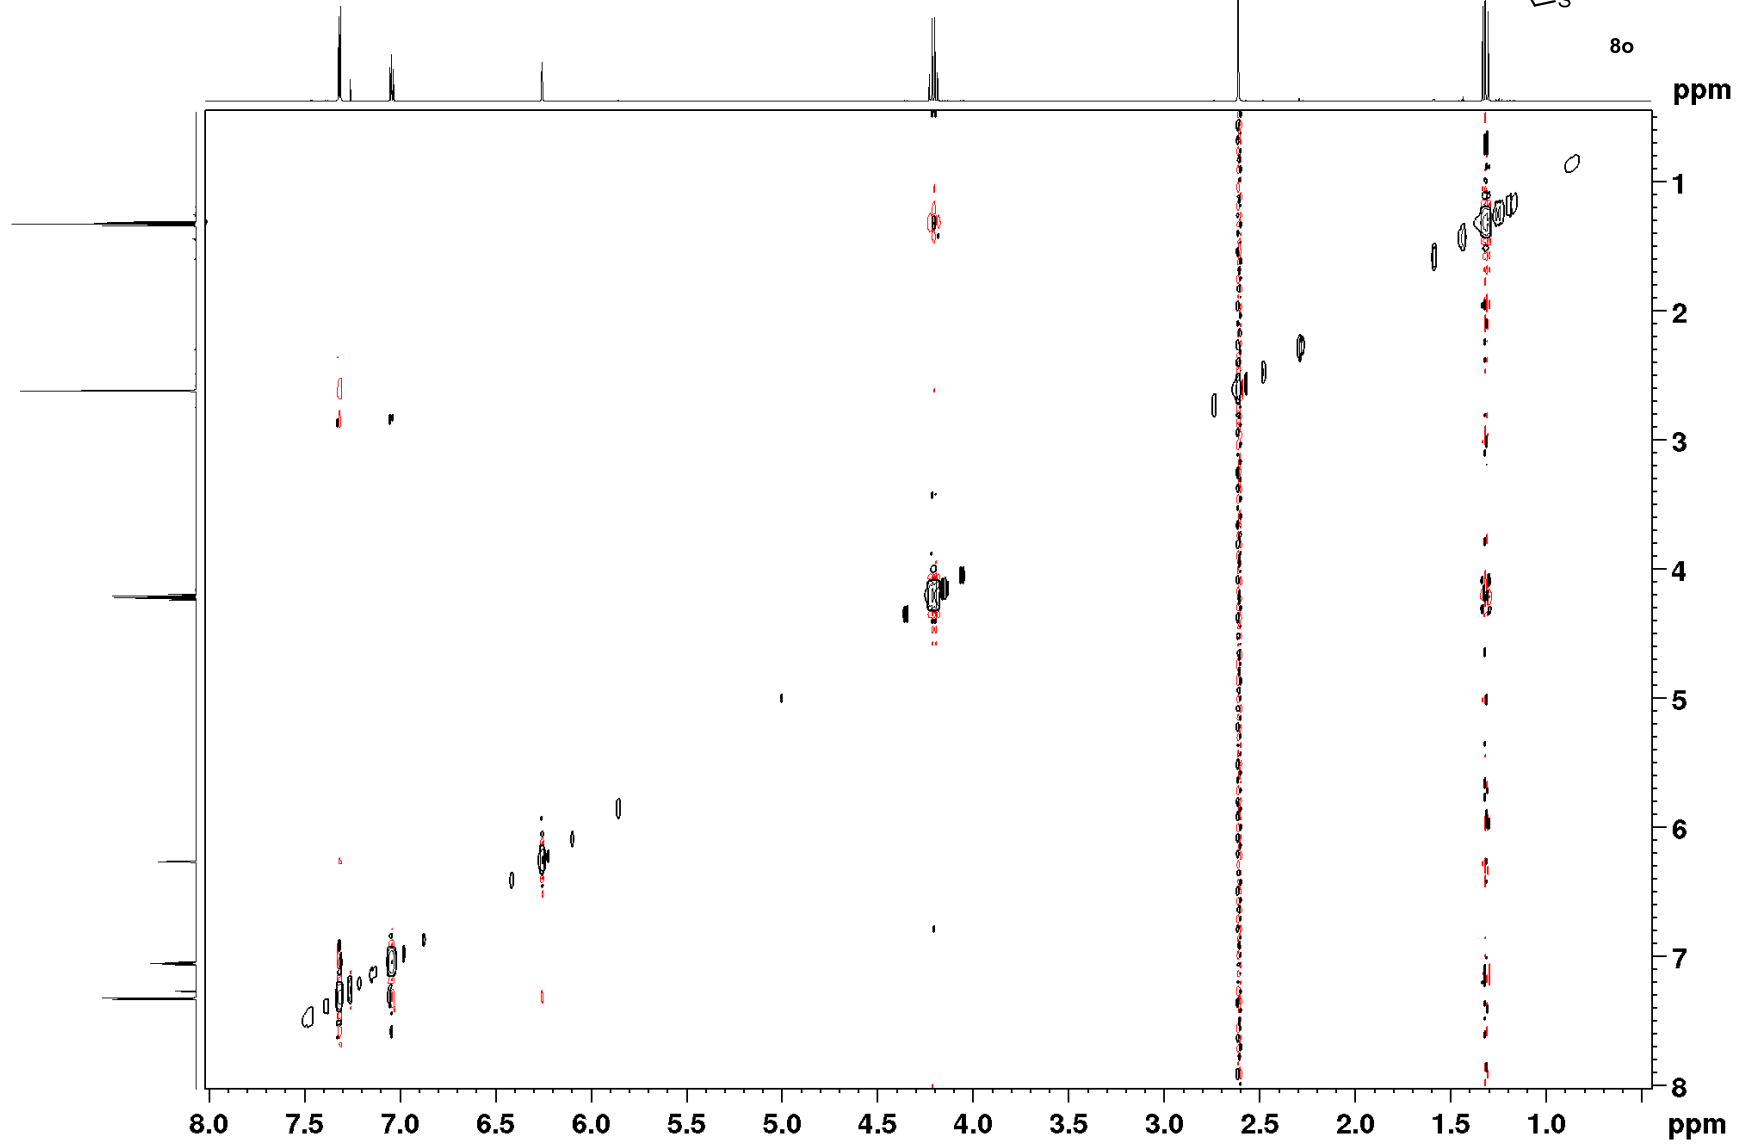

S453

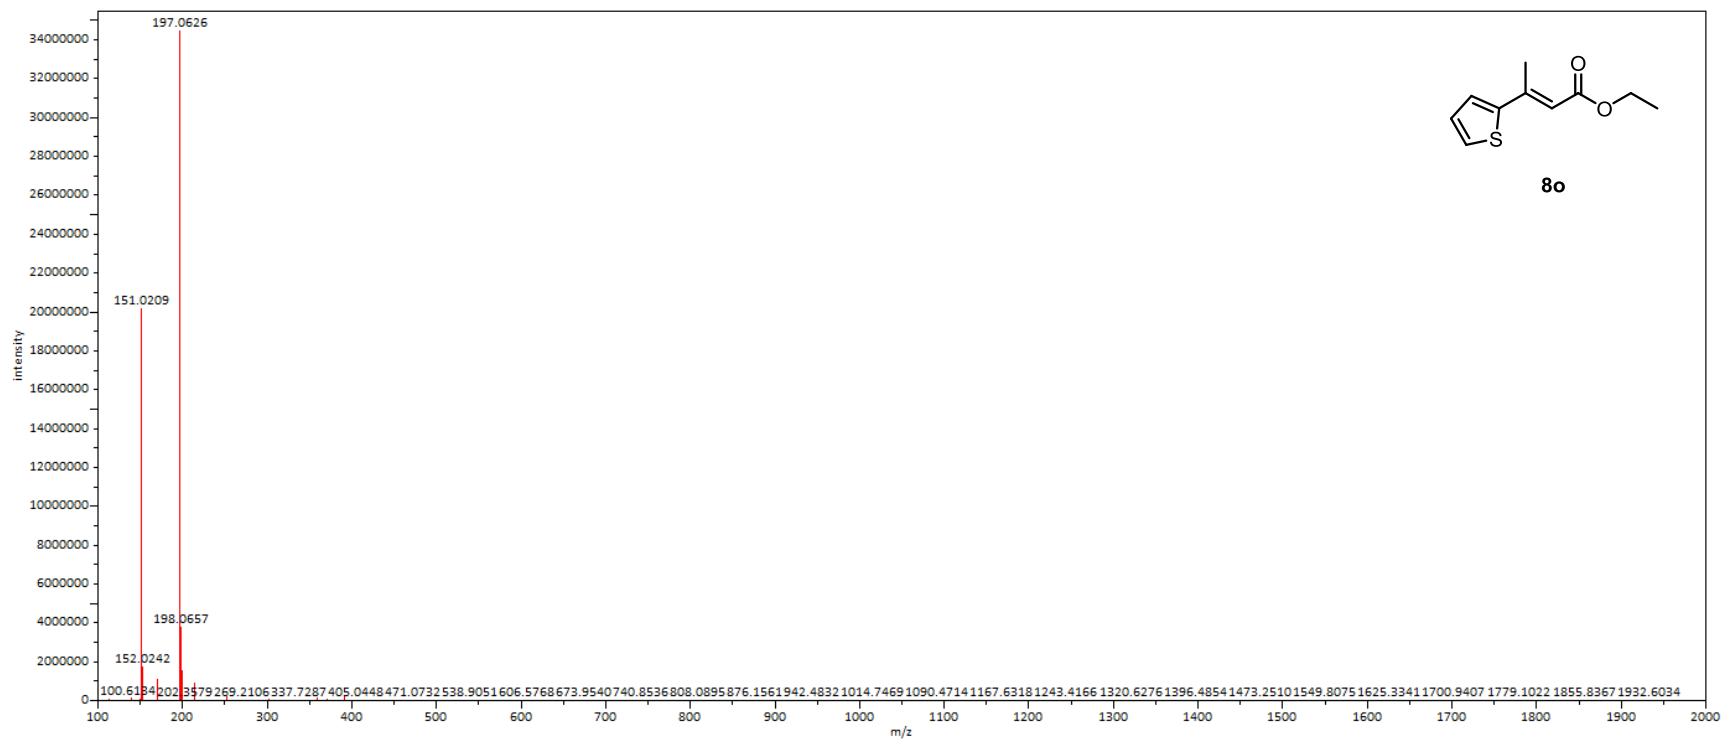

S454

Ethyl (*E*)-3-cyclopropyl-3-phenylacrylate (**9p**)

<sup>1</sup>H NMR

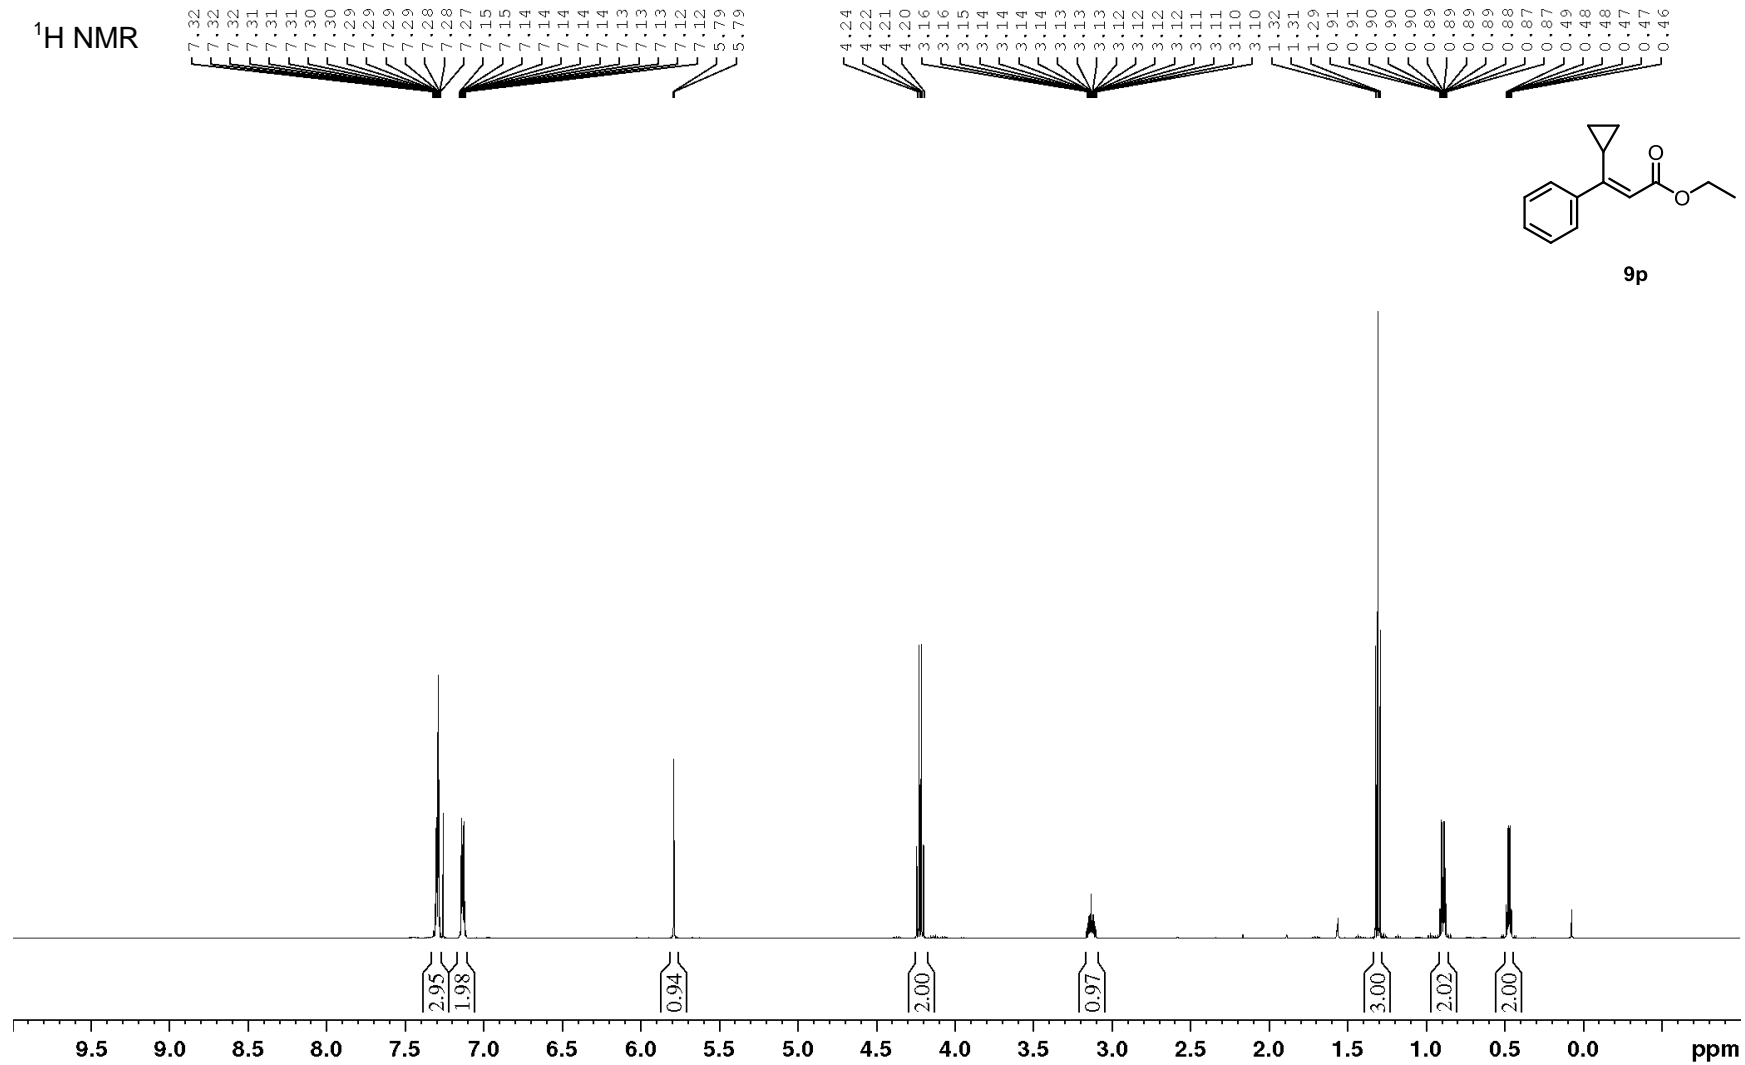

<sup>13</sup>C NMR

167.1  
163.3

139.0

128.2  
127.9  
127.8

118.9

59.9

14.5  
13.6

7.0

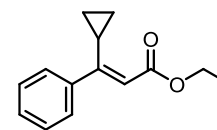

9p

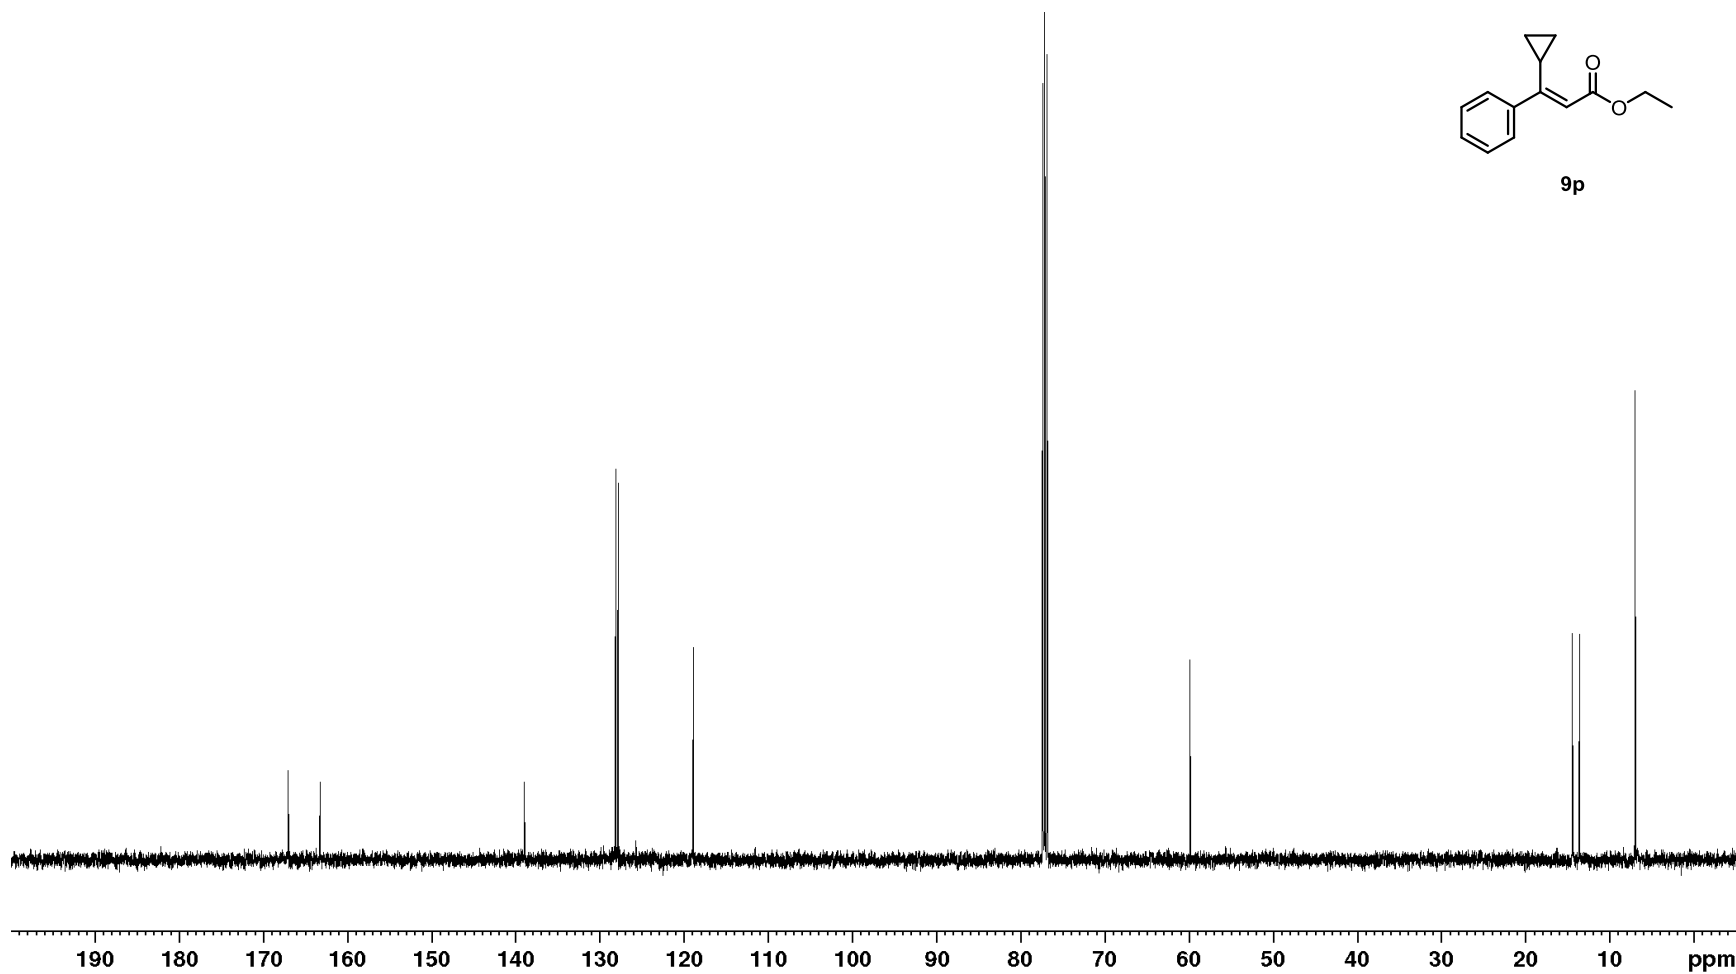

$^1\text{H}$ - $^1\text{H}$  COSY

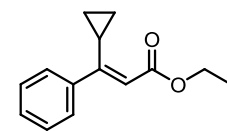

9p

ppm

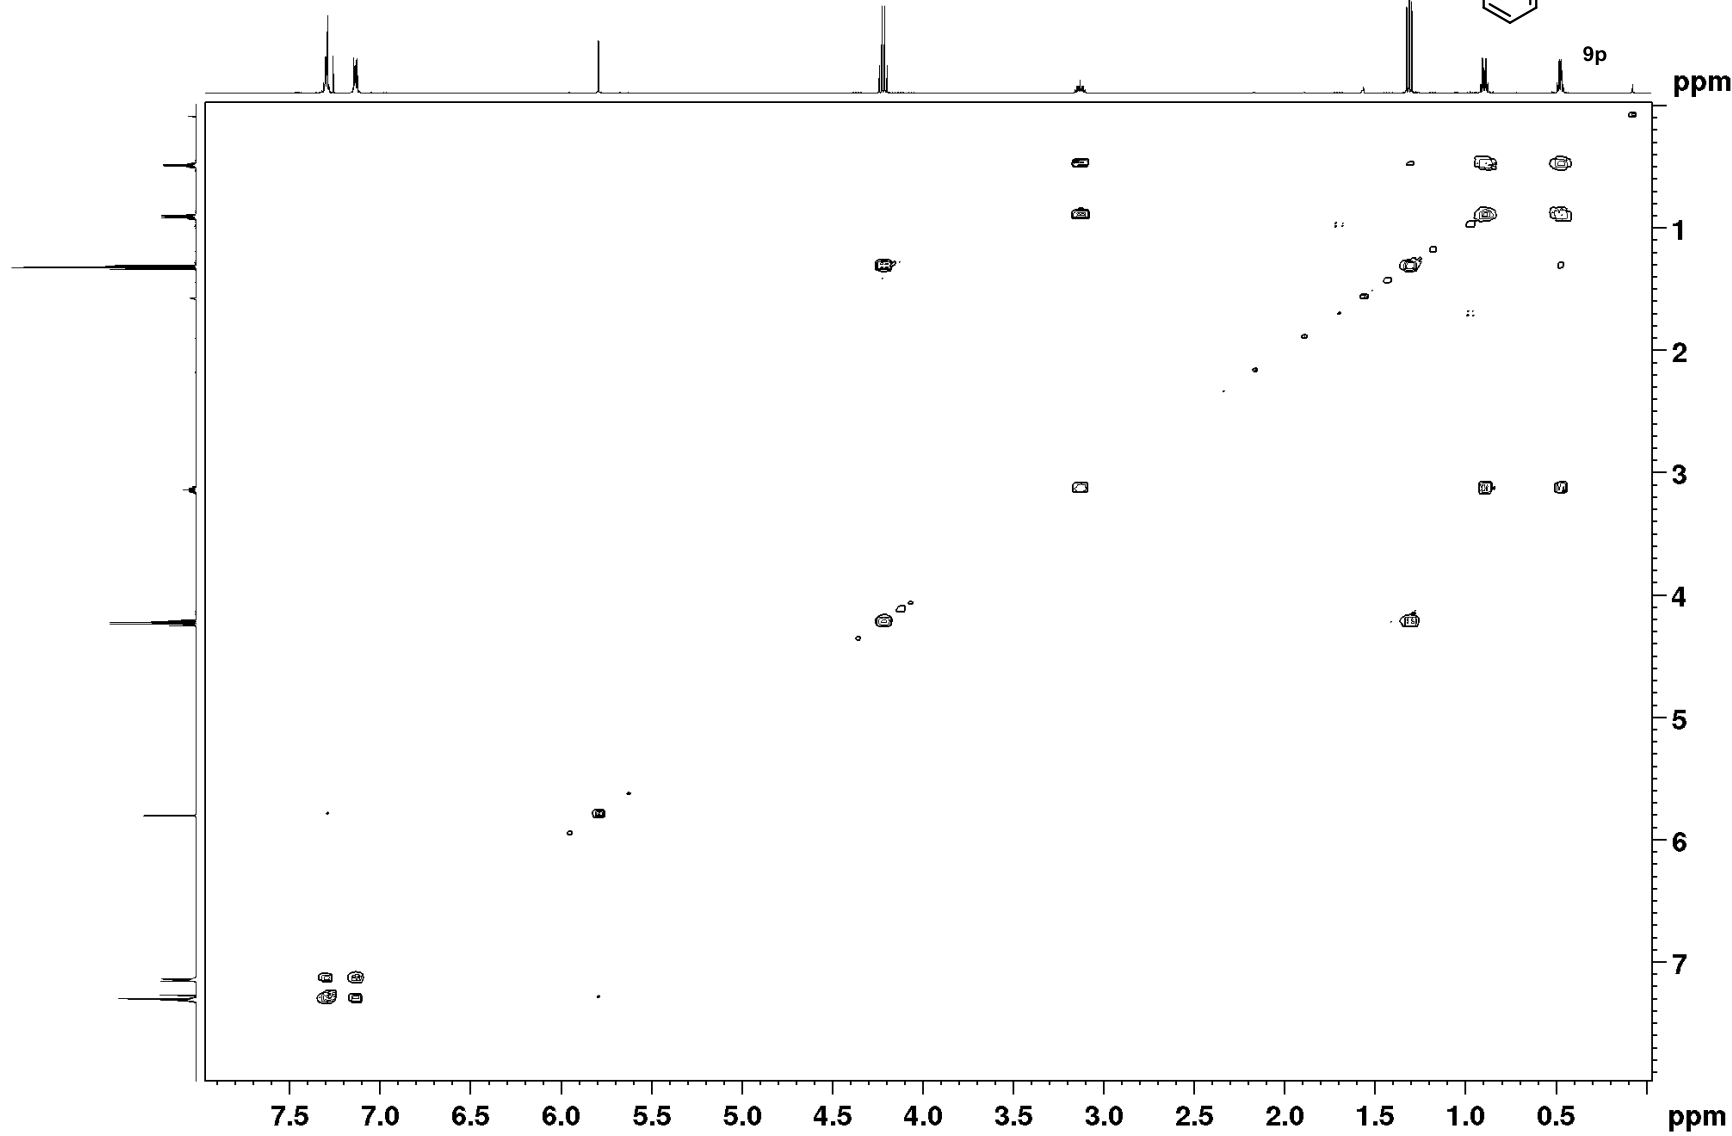

$^1\text{H}$ - $^{13}\text{C}$  HSQC

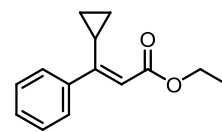

9p

ppm

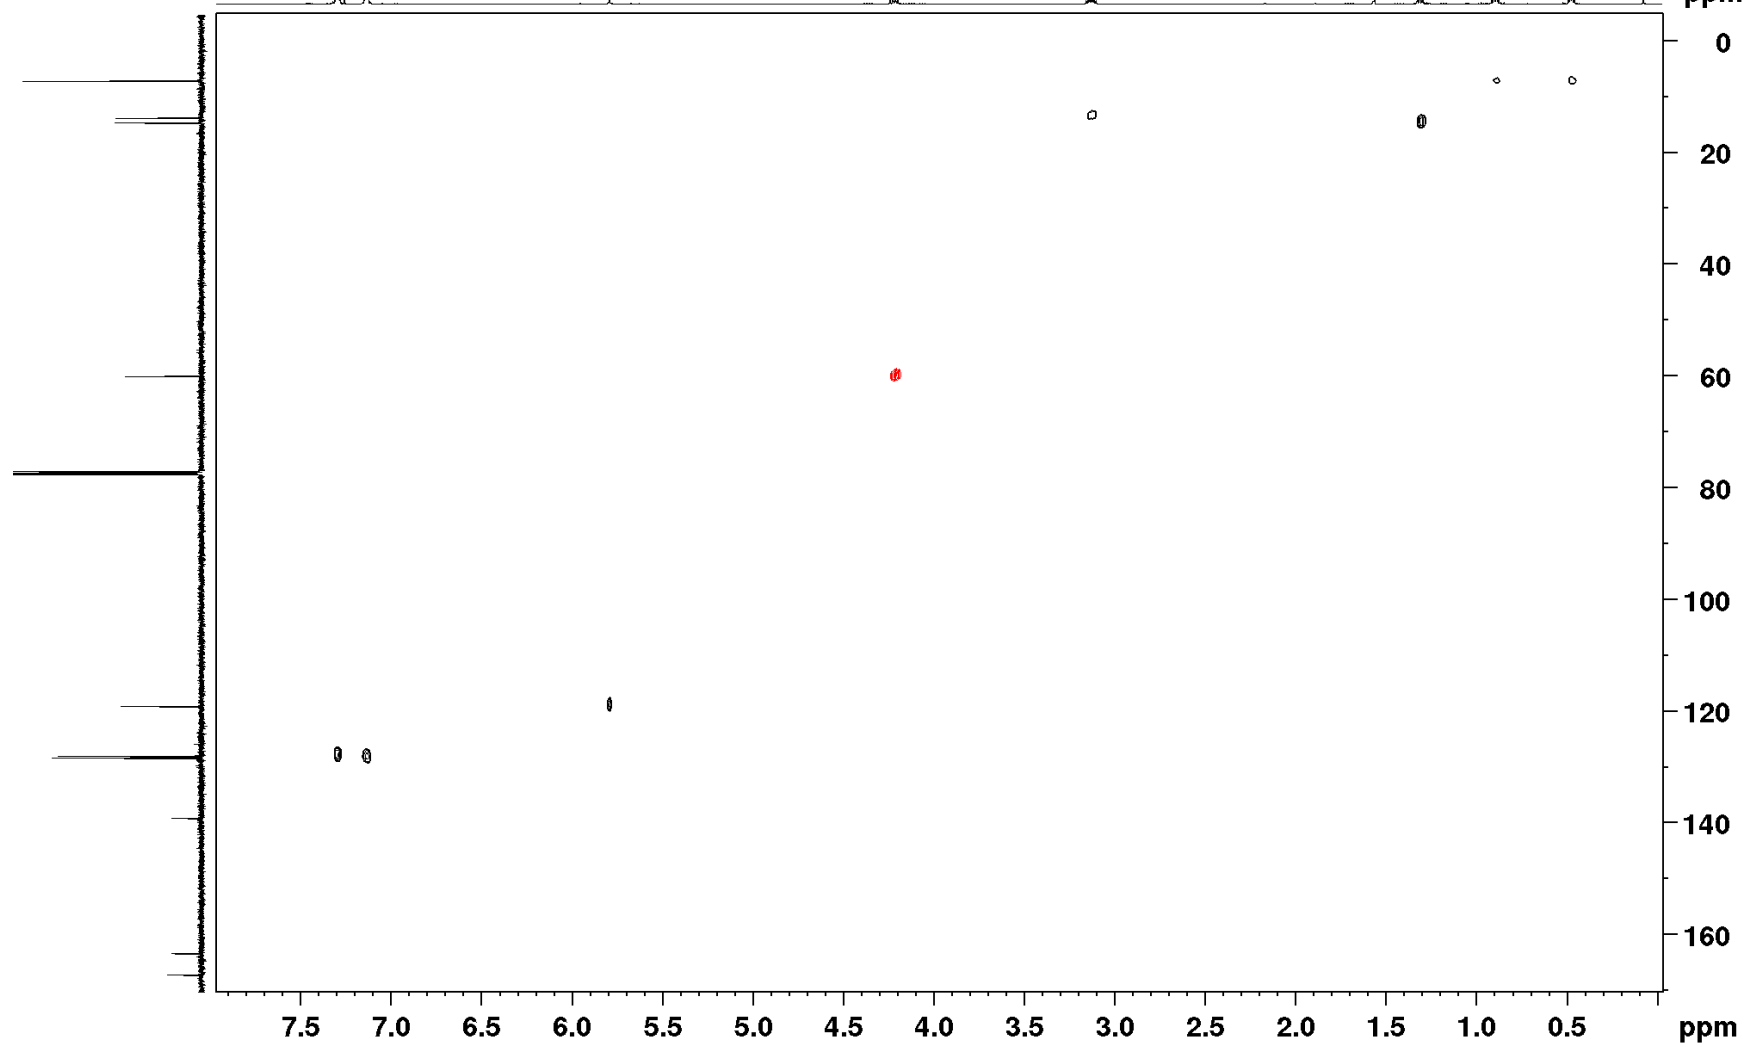

S458

$^1\text{H}$ - $^{13}\text{C}$  HMBC

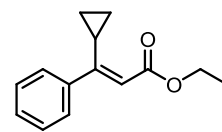

9p

ppm

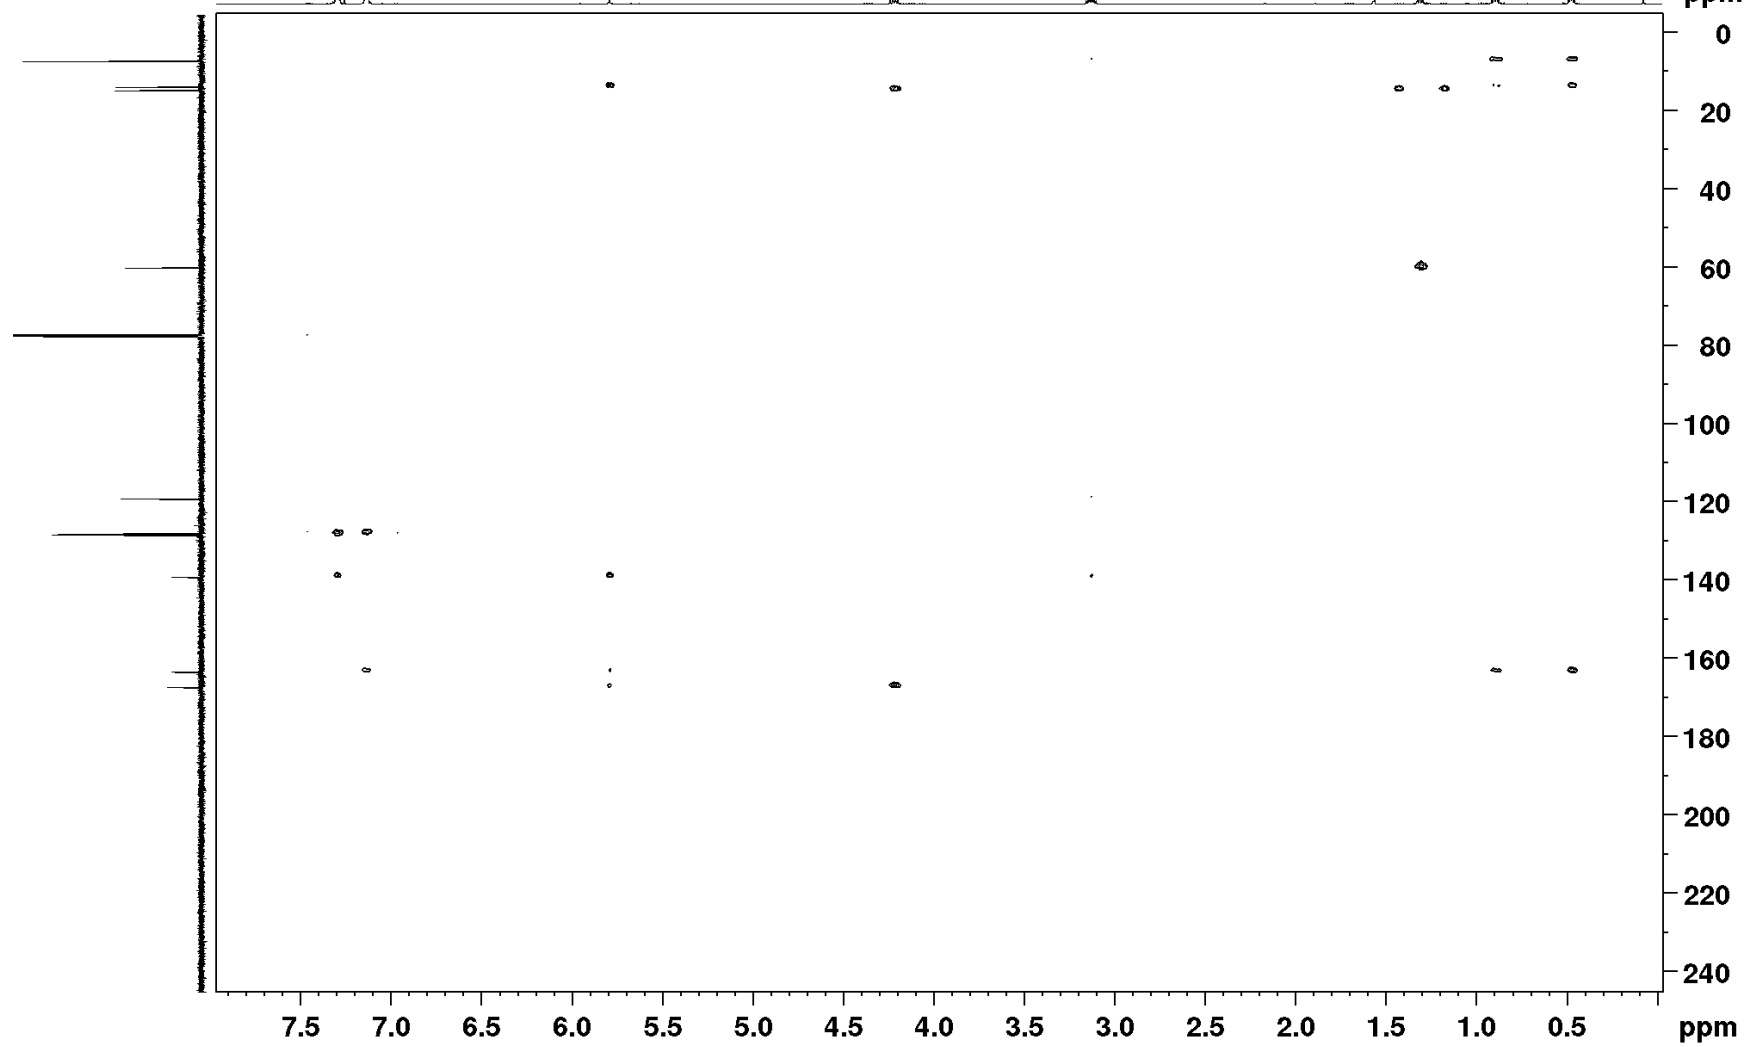

$^1\text{H}$ - $^1\text{H}$  NOESY



9p ppm

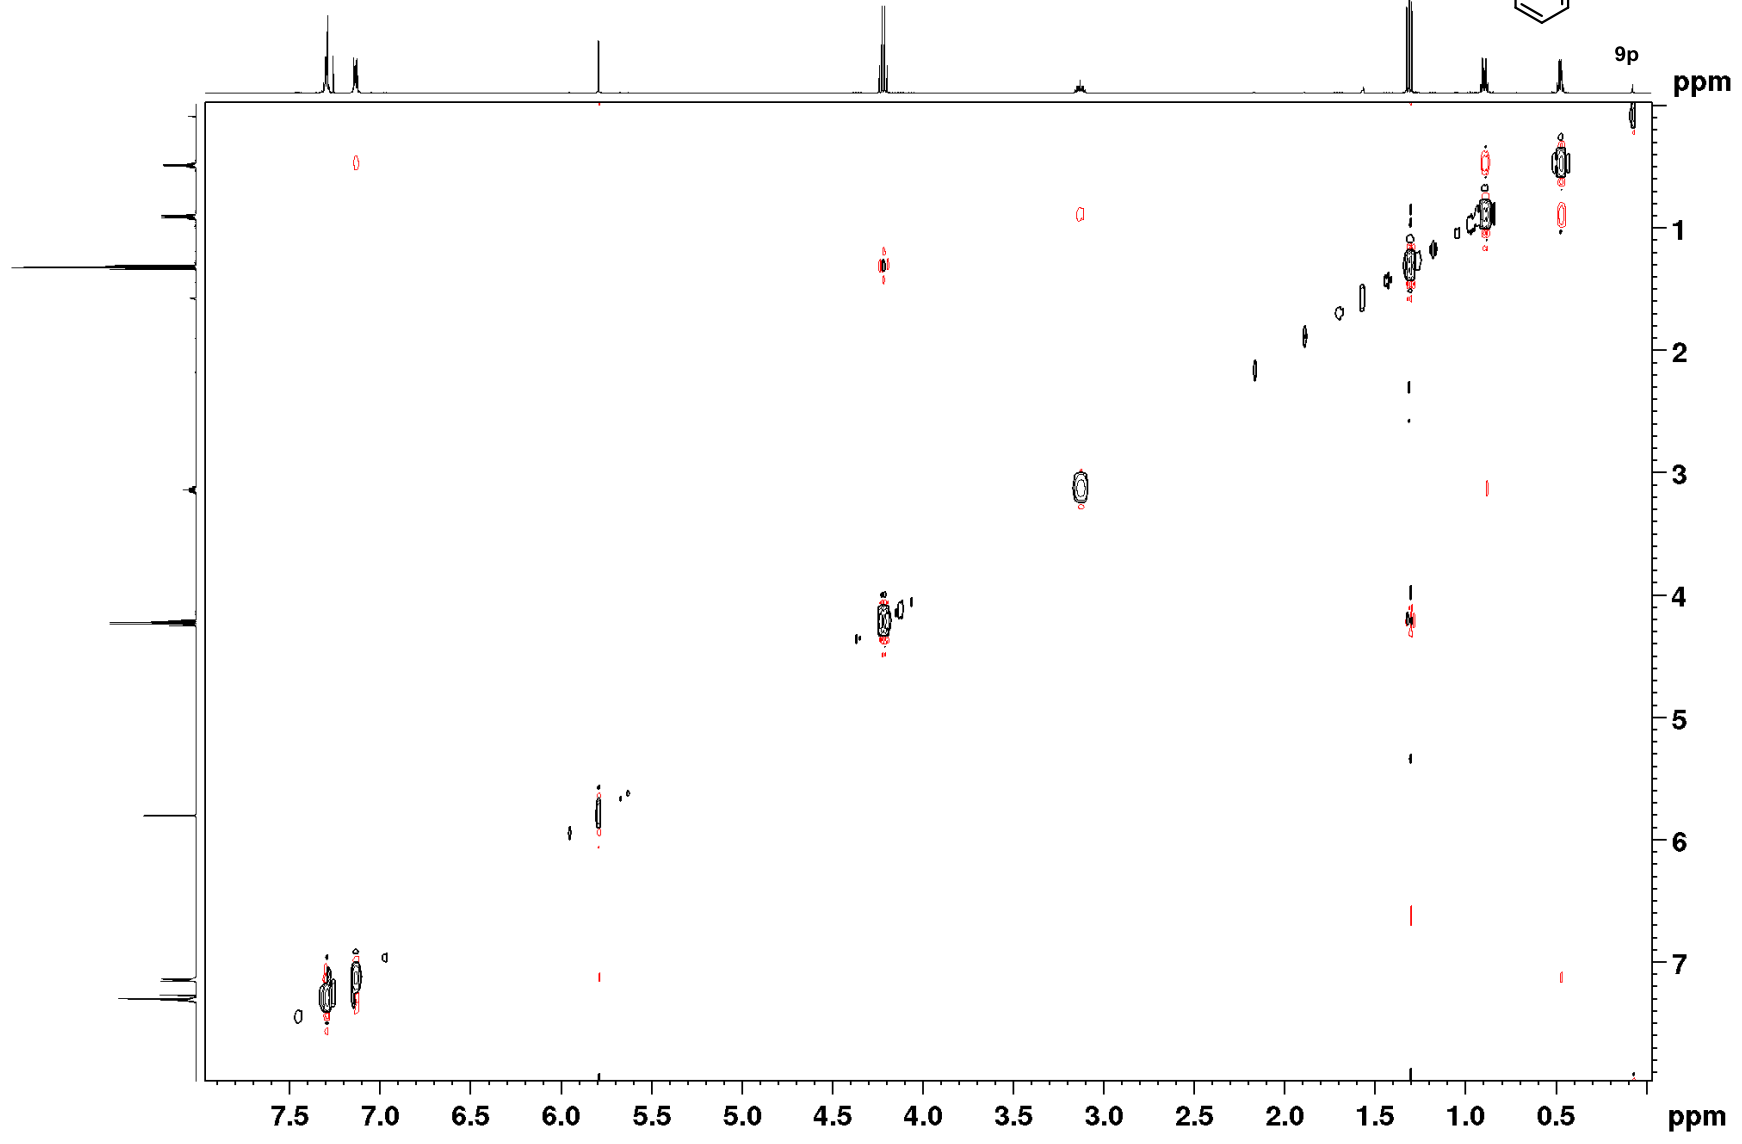

S460



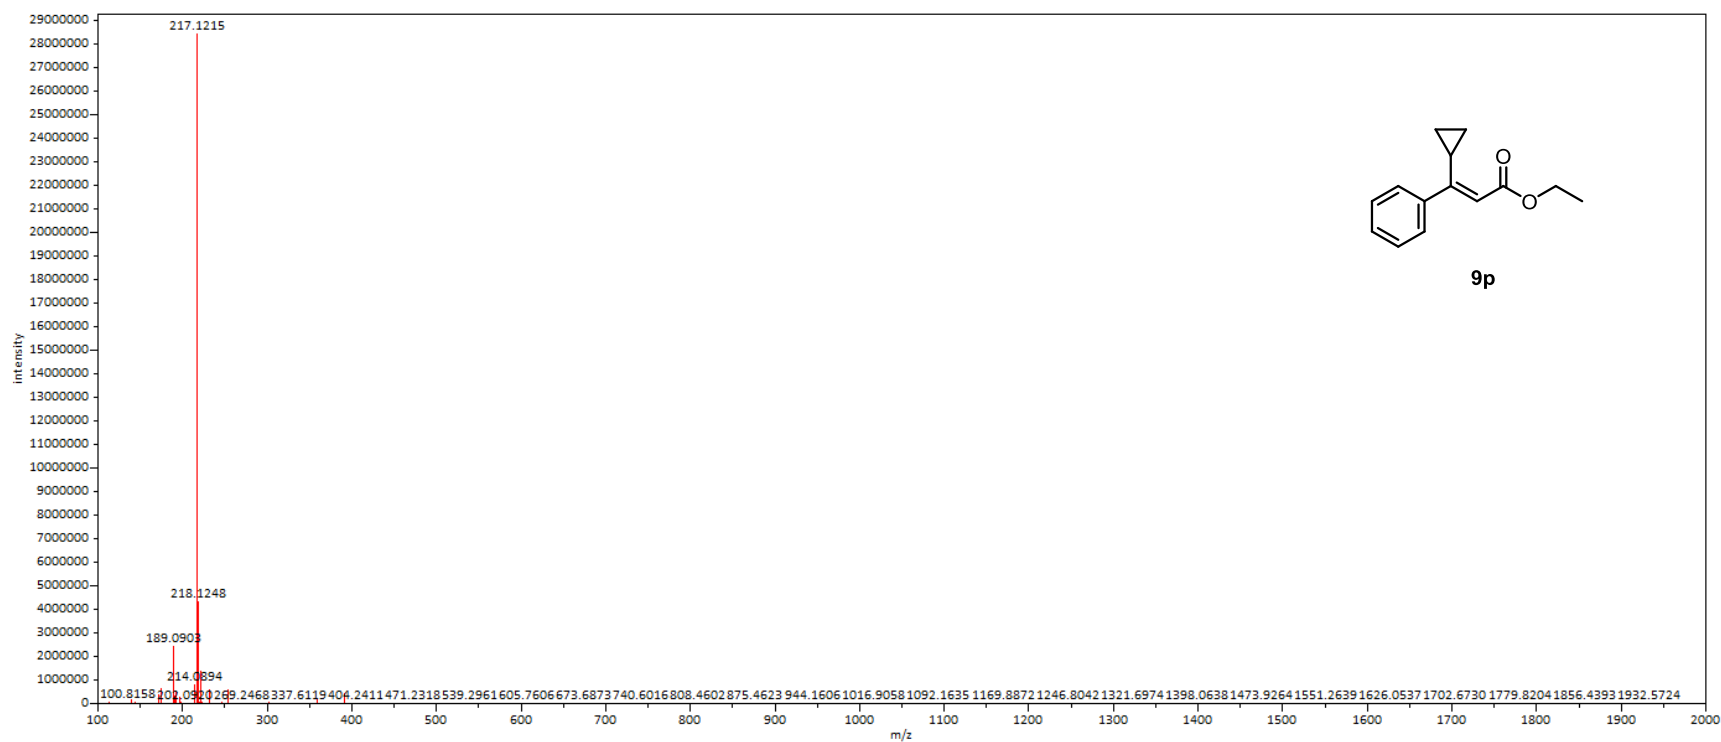

Hex-5-en-1-yl (*E*)-3-phenylbut-2-enoate (9q)

<sup>1</sup>H NMR

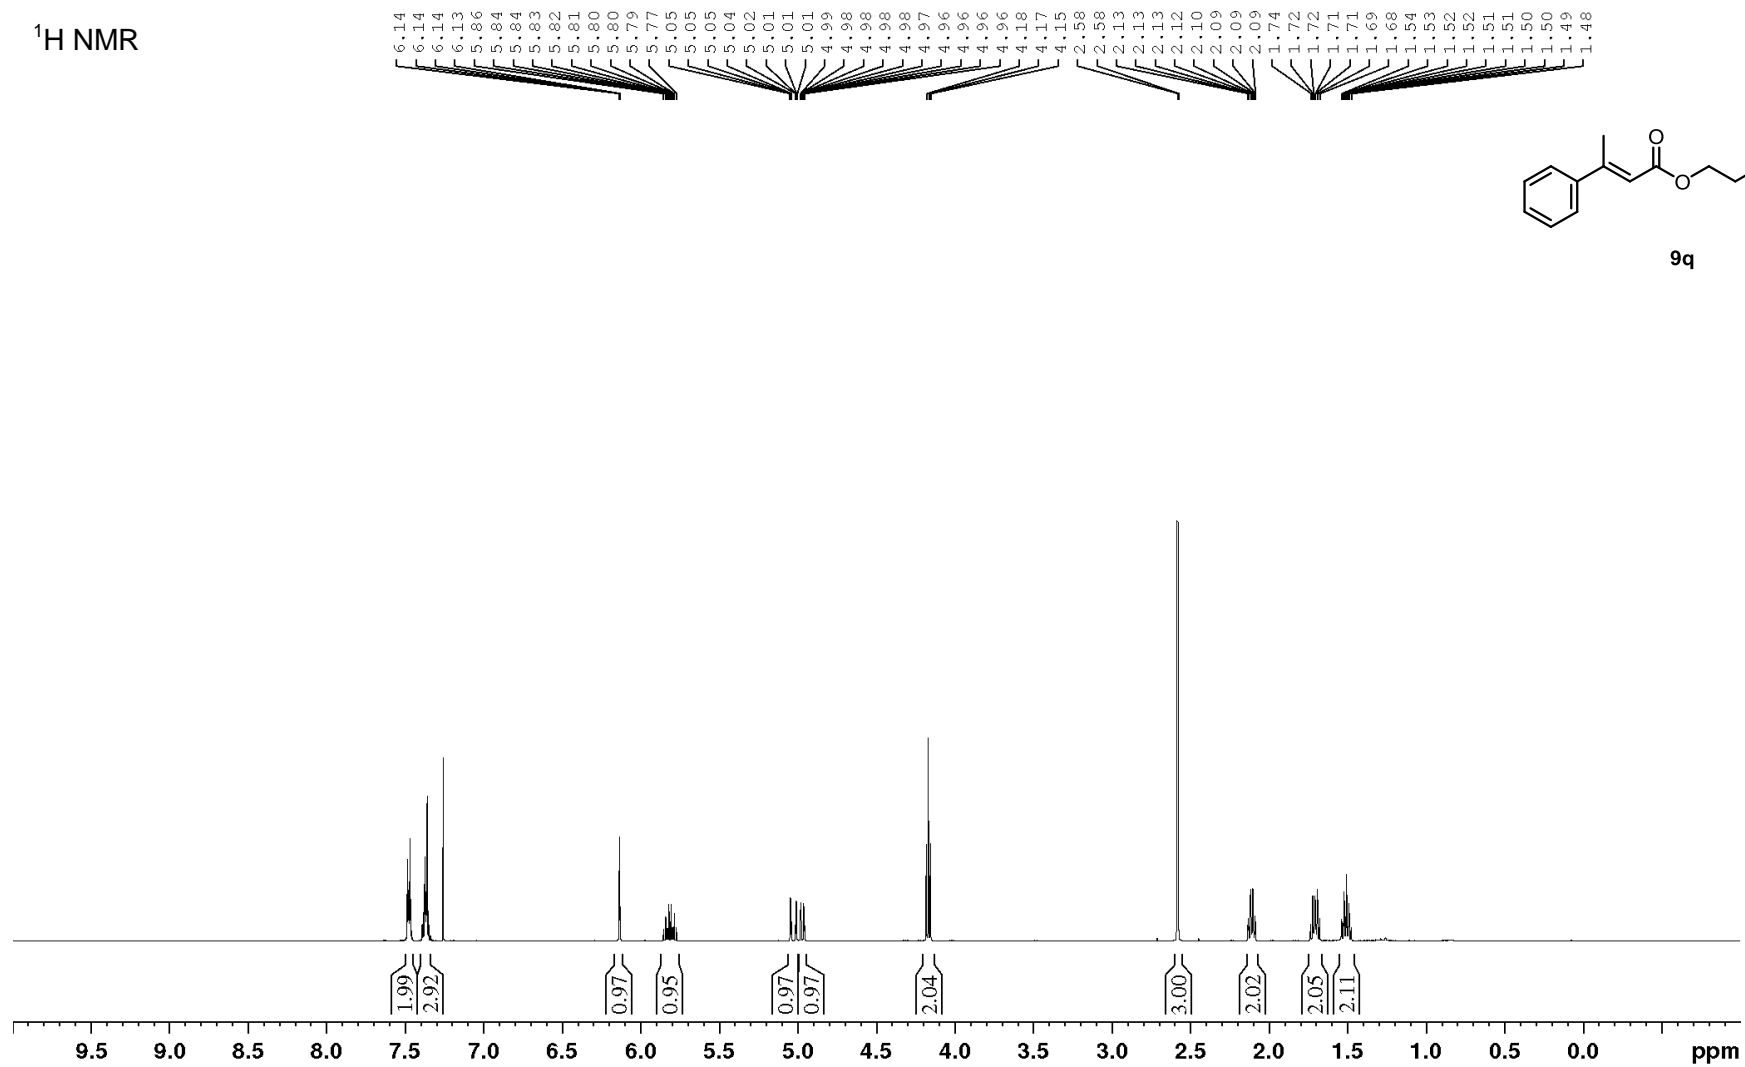

<sup>13</sup>C NMR

167.1

155.7

142.4

138.5

129.1

128.6

126.4

117.3

114.9

64.0

33.5

28.3

25.4

18.1

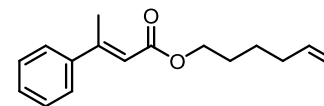

9q

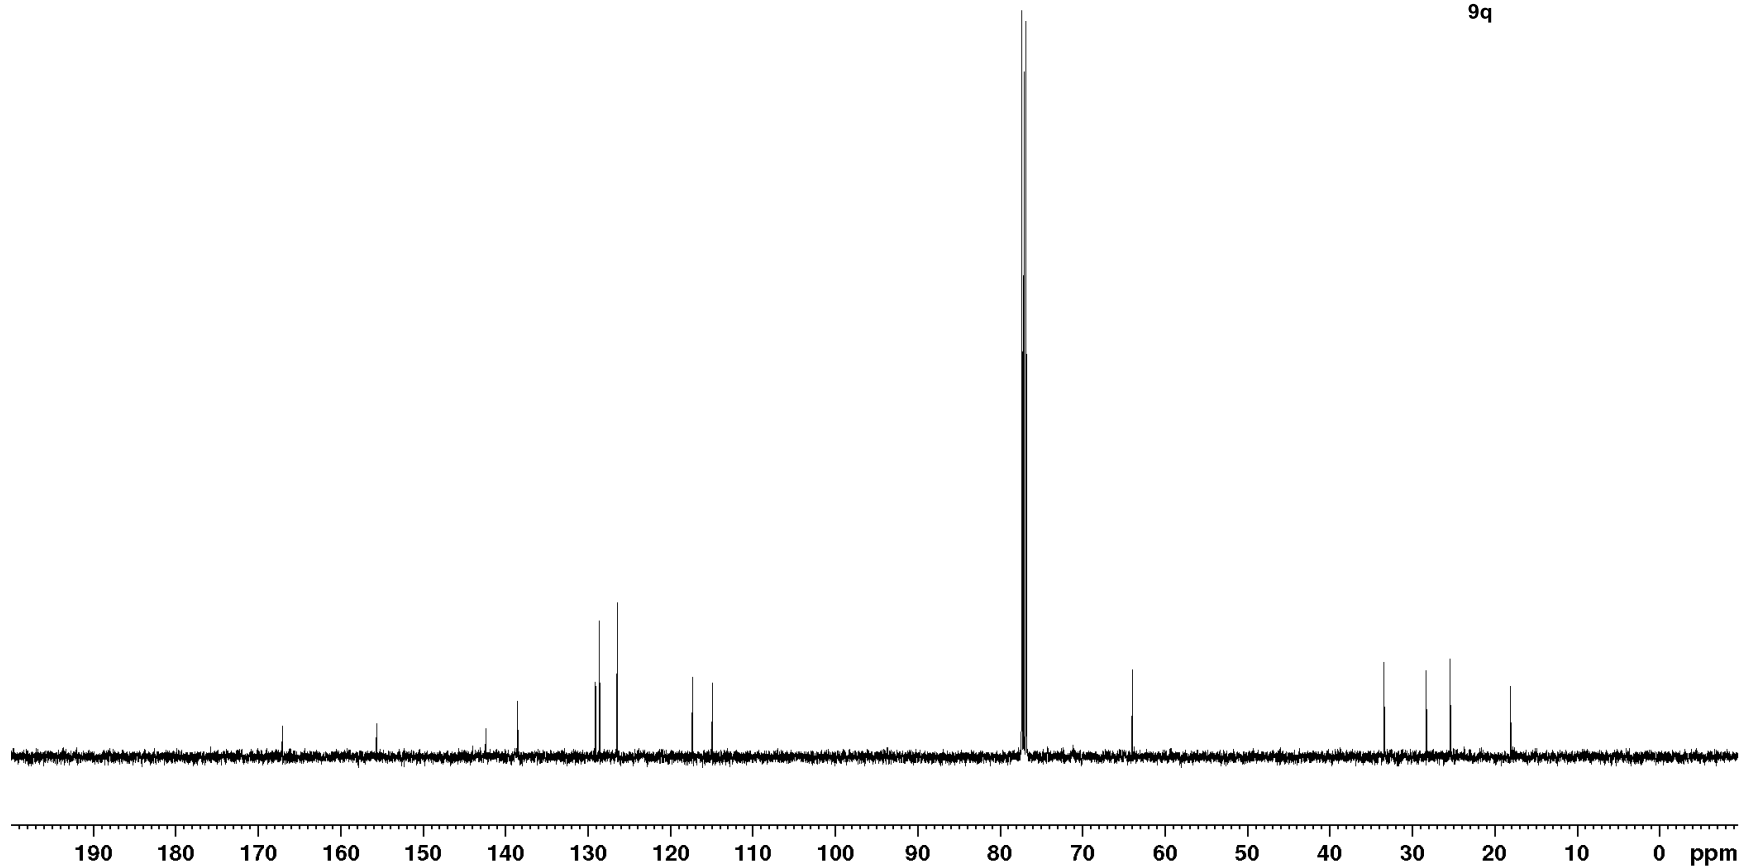

$^1\text{H}$ - $^1\text{H}$  COSY

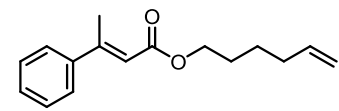

9q

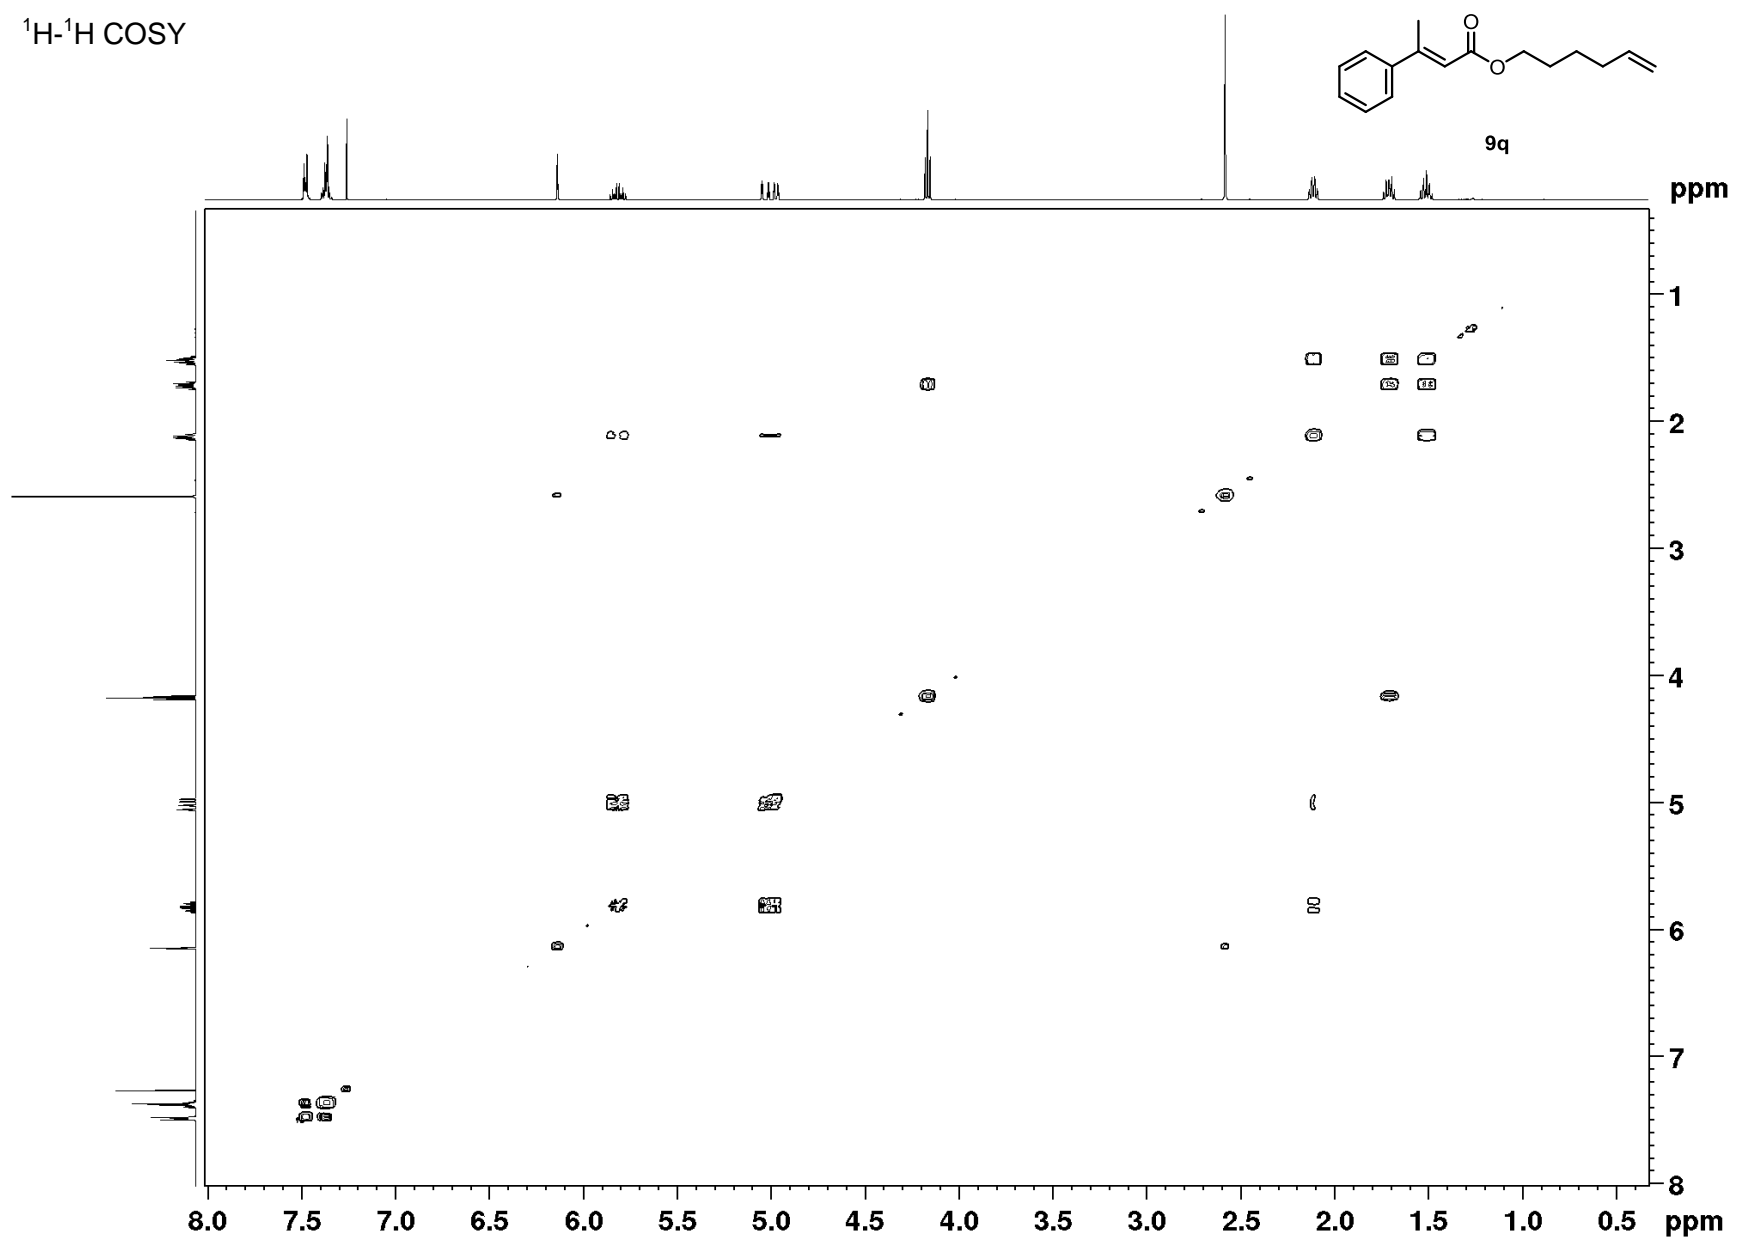

$^1\text{H}$ - $^{13}\text{C}$  HSQC

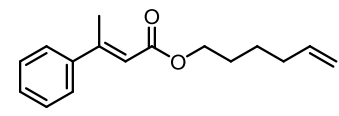

9q

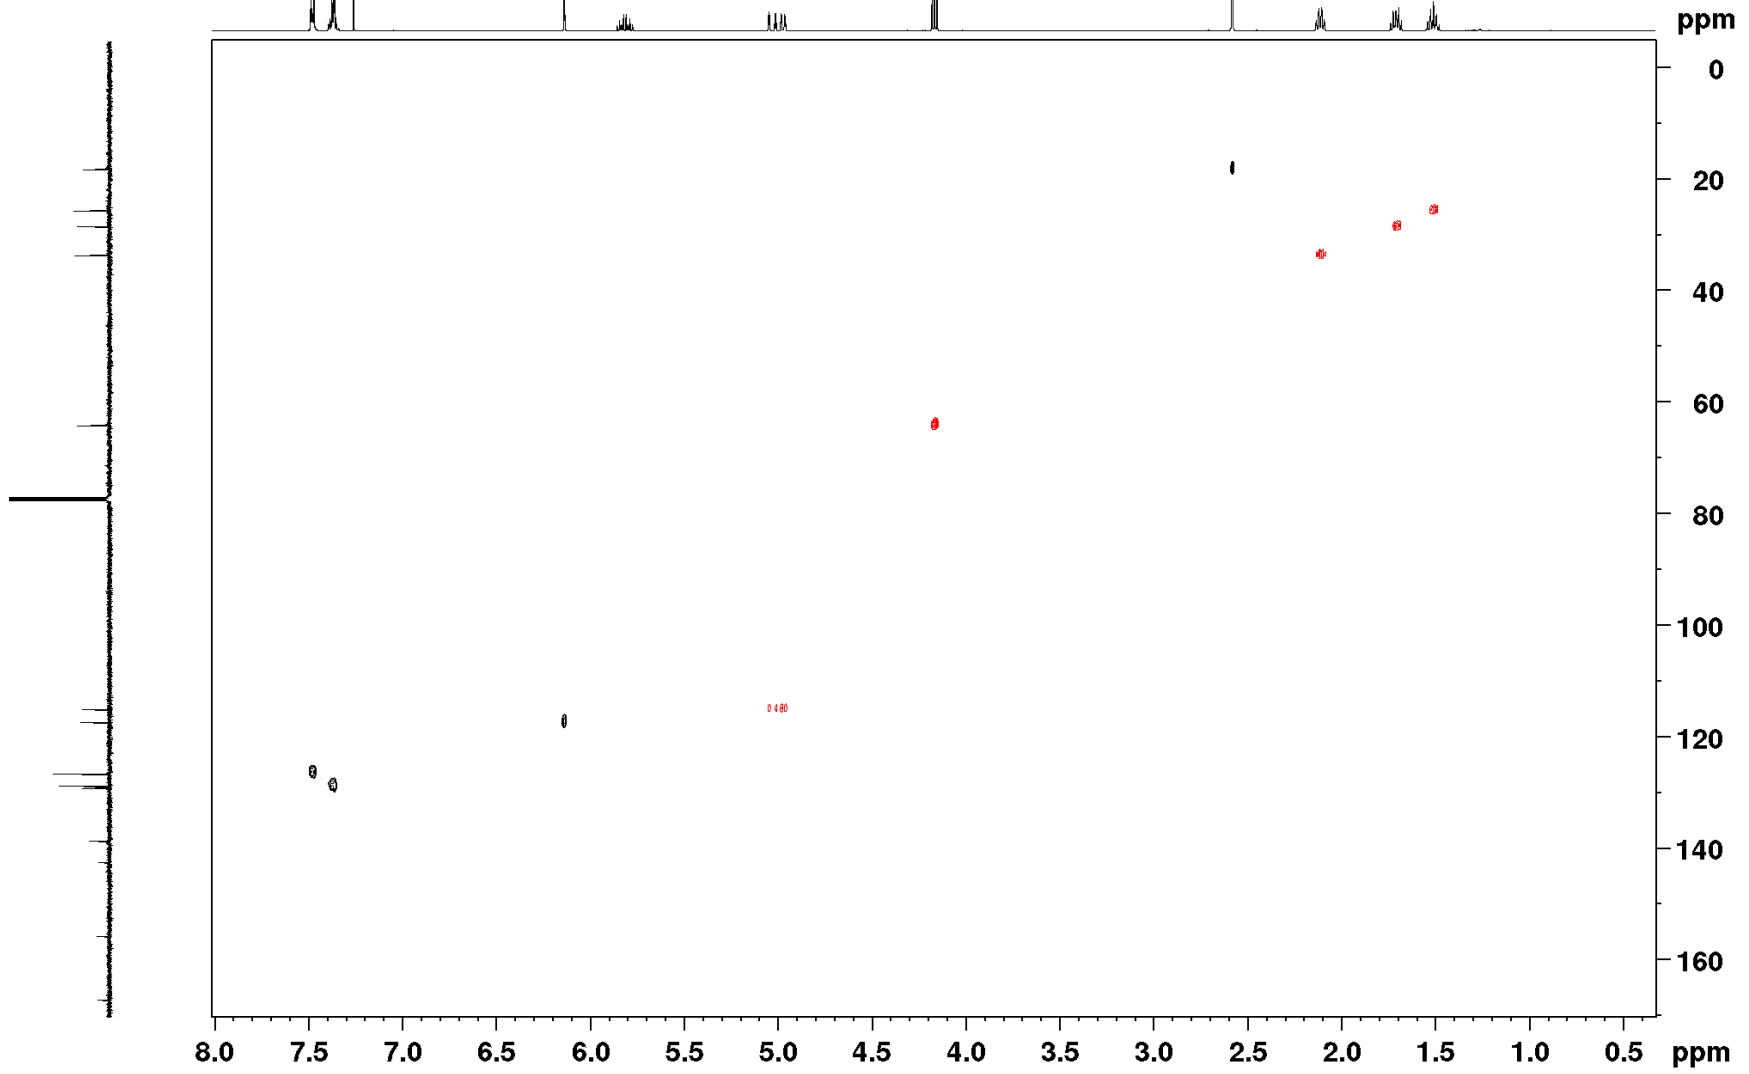

S465

$^1\text{H}$ - $^{13}\text{C}$  HMBC

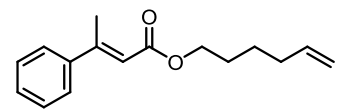

9q

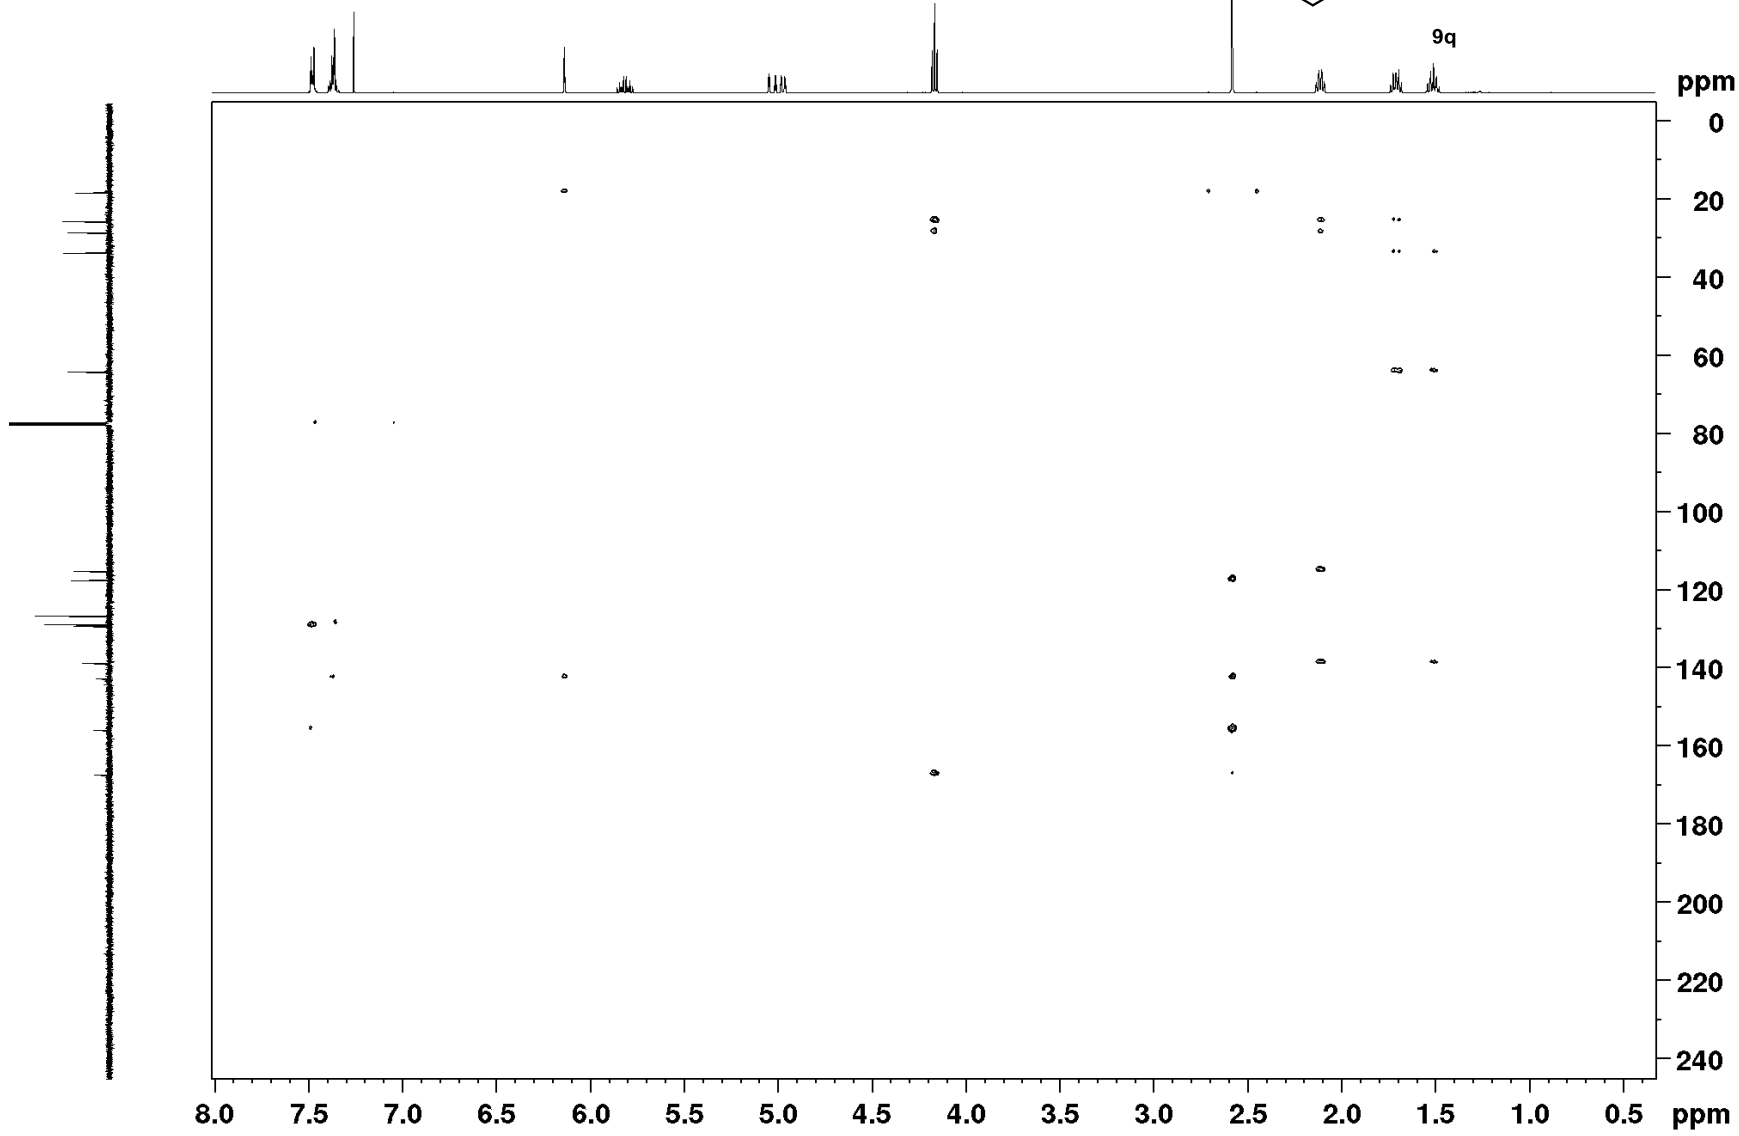

$^1\text{H}$ - $^1\text{H}$  NOESY

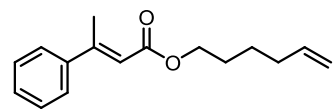

9q

ppm

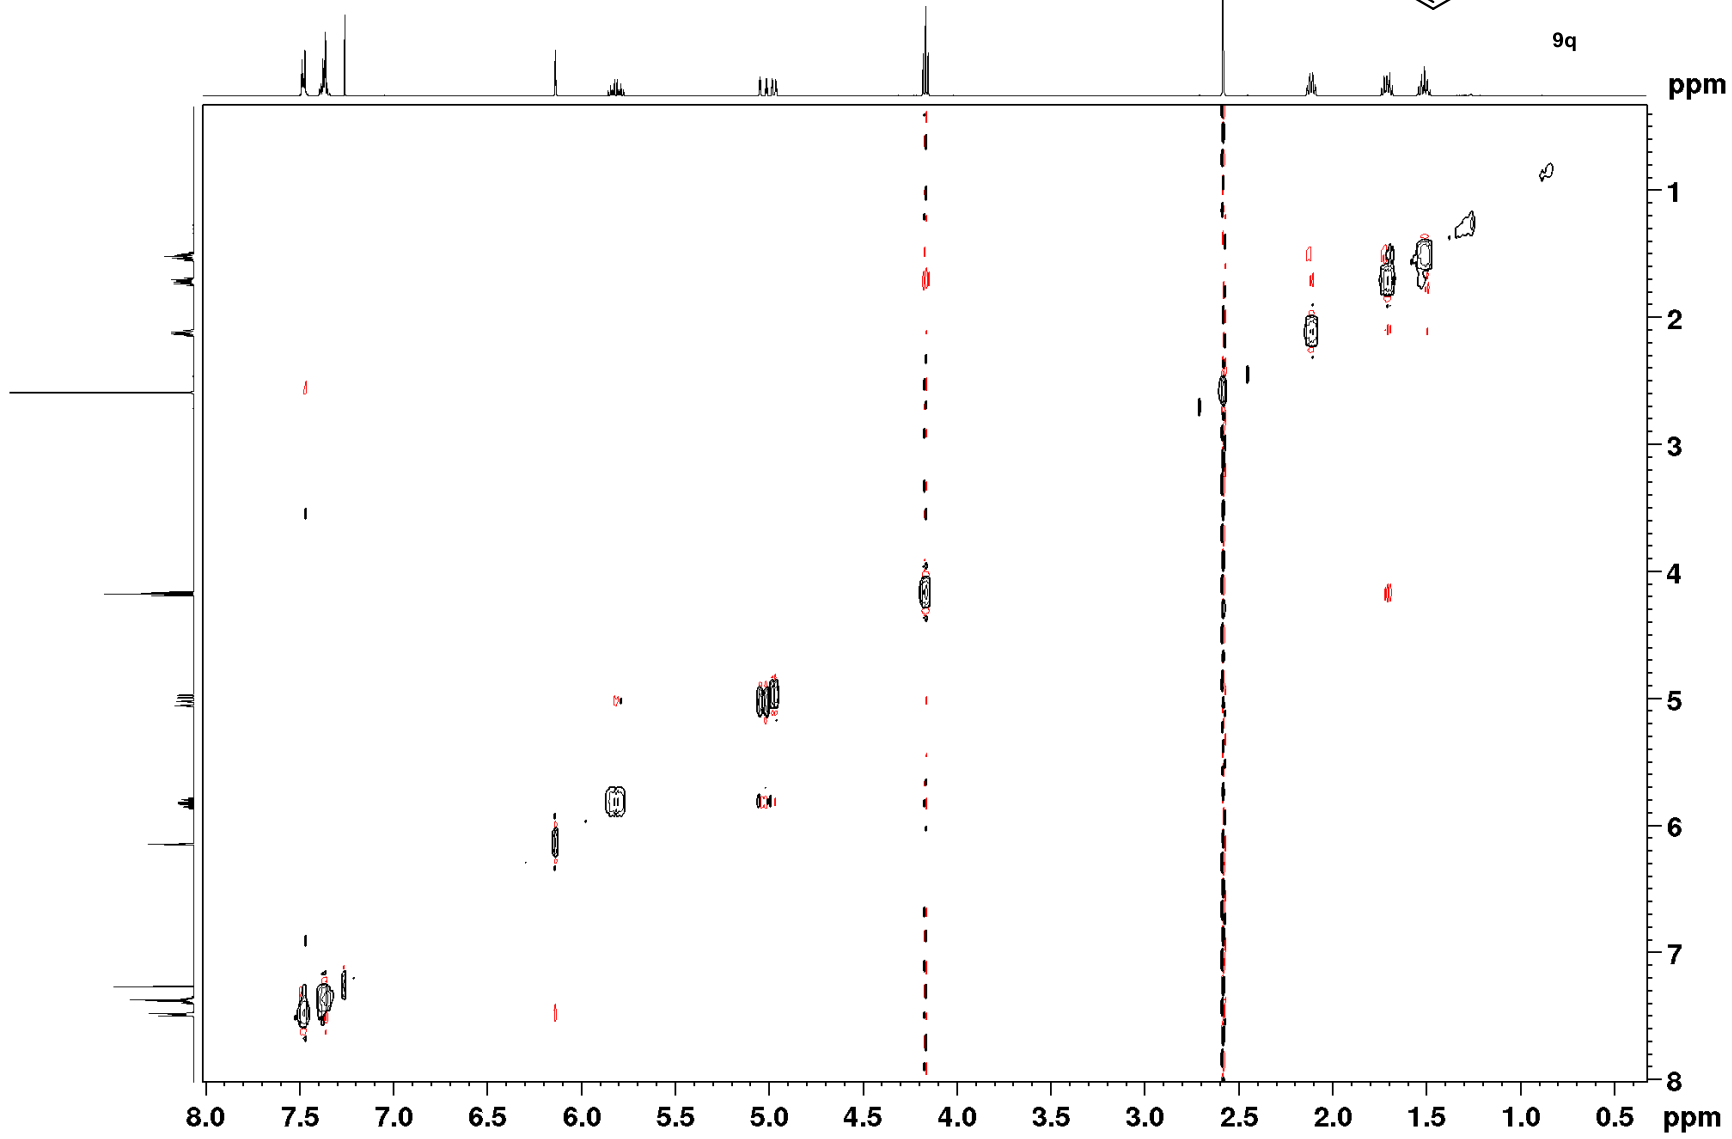

S467

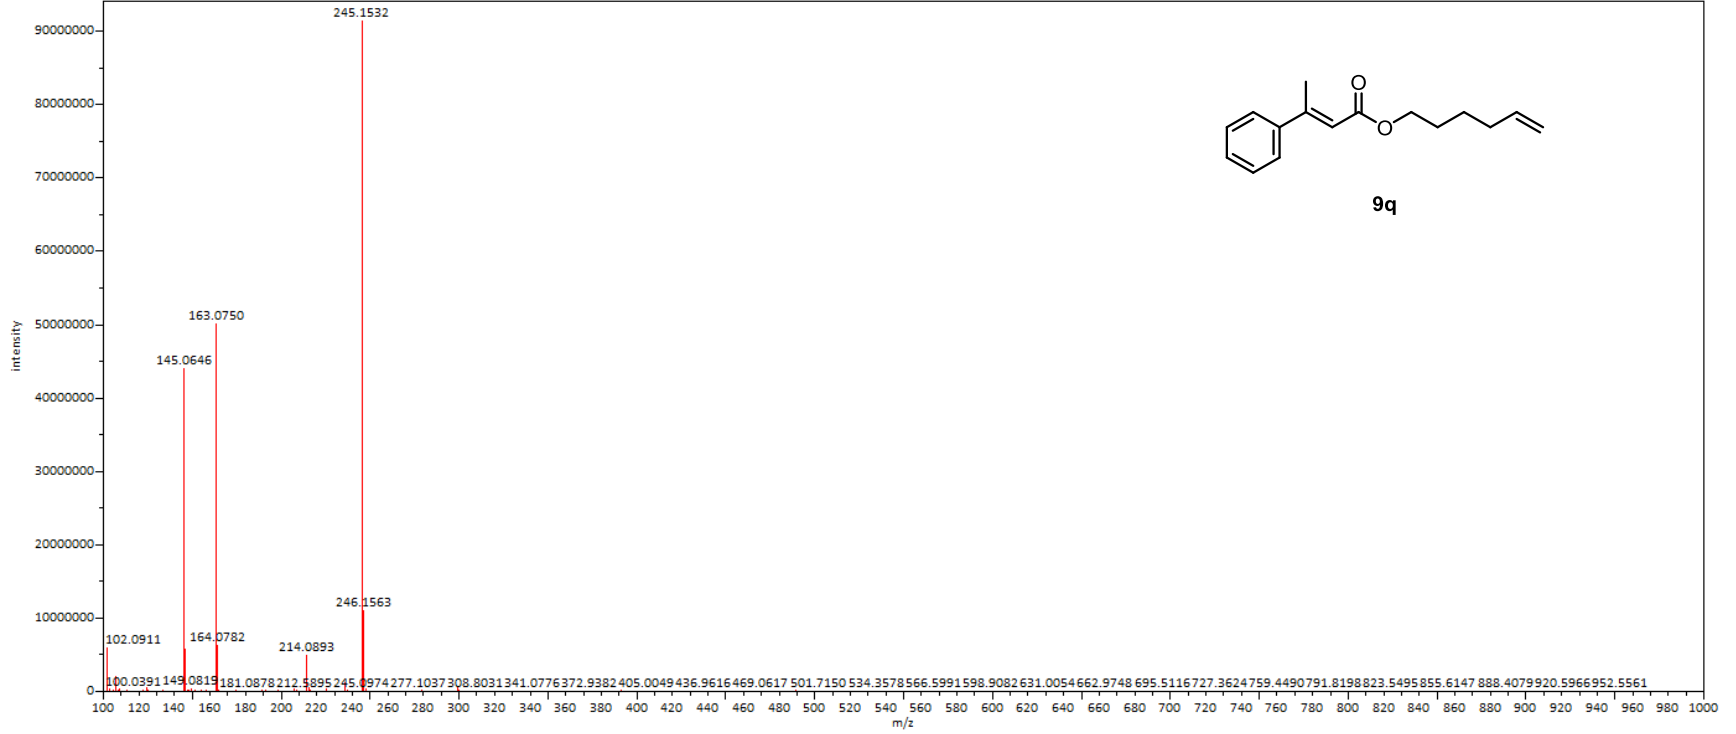



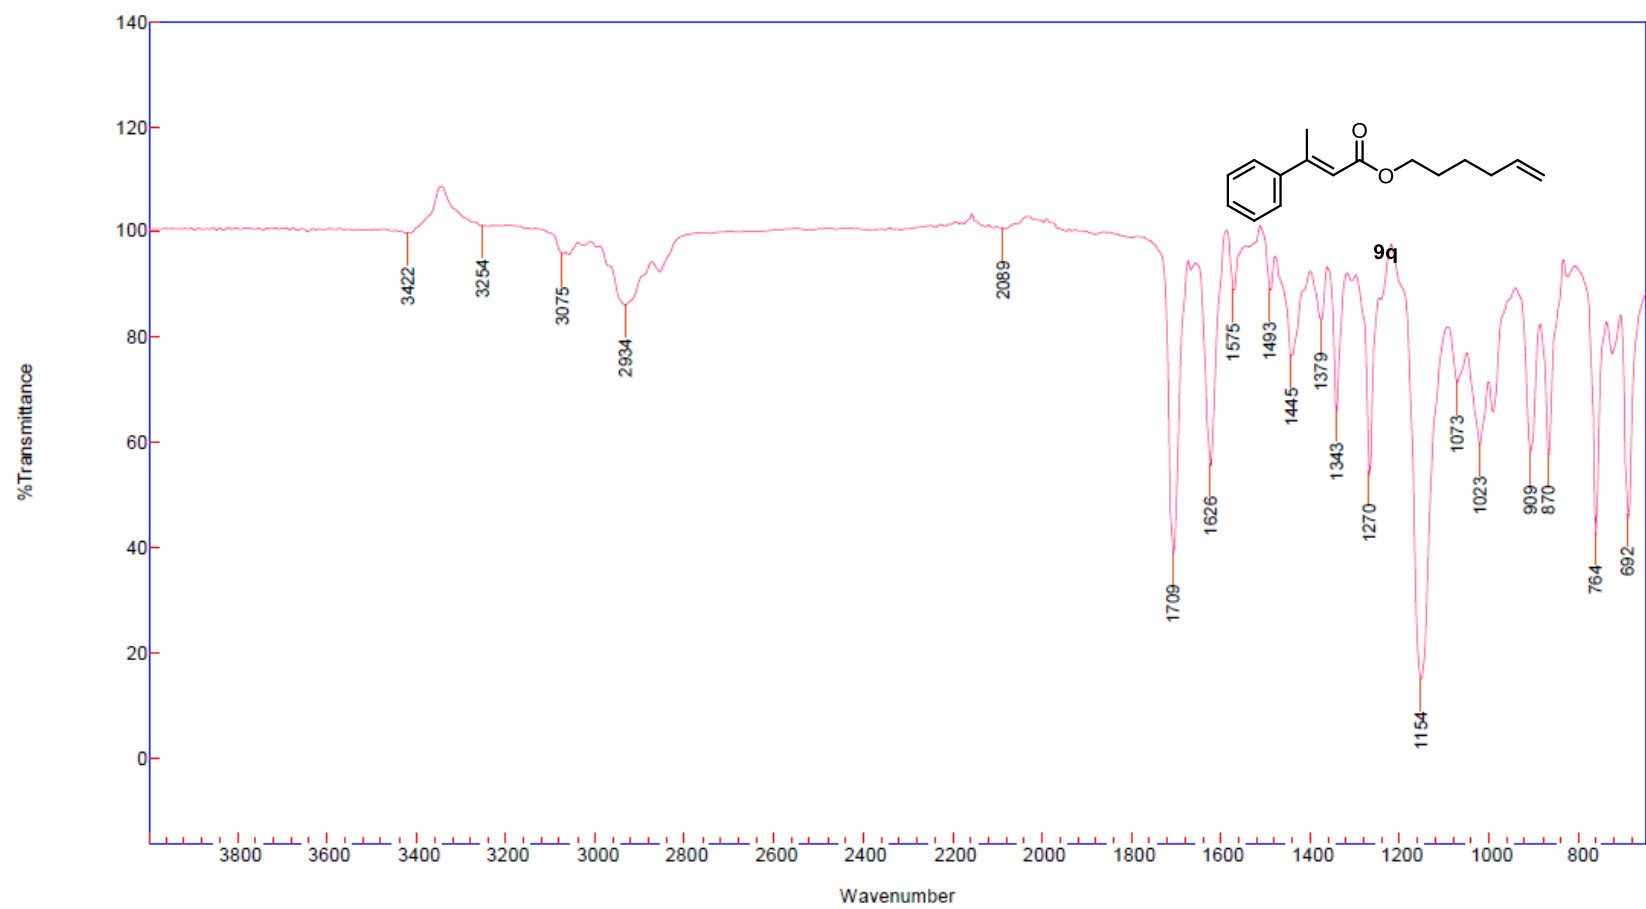



<sup>13</sup>C NMR

167.5  
165.0

114.1

59.6

48.9

31.5

26.6

26.3

17.5

14.5

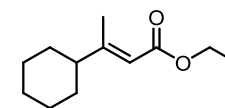

8t

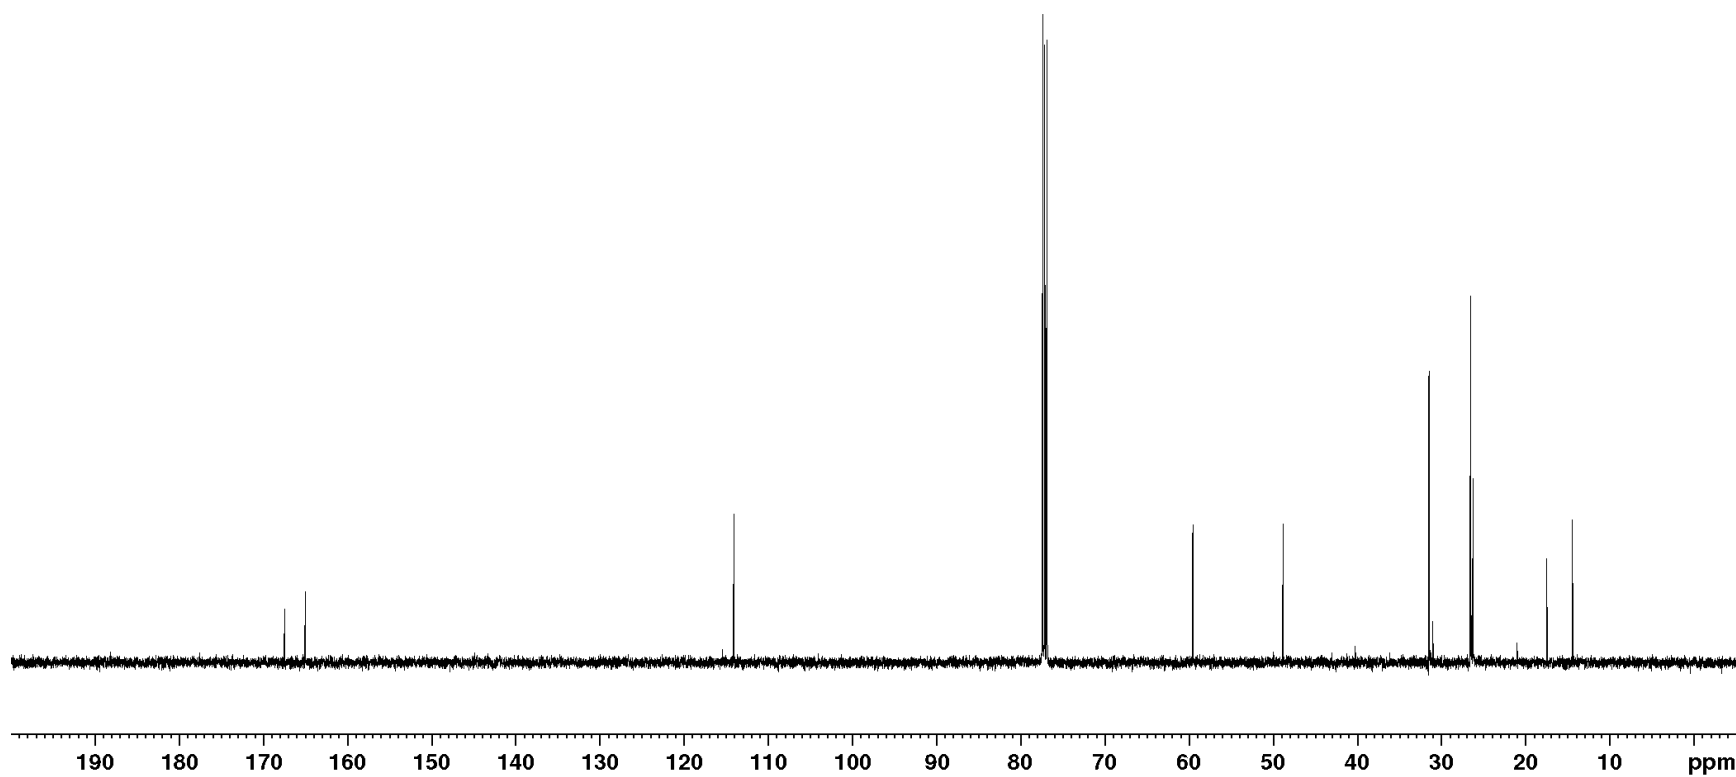

$^1\text{H}$ - $^1\text{H}$  COSY

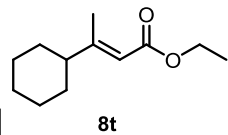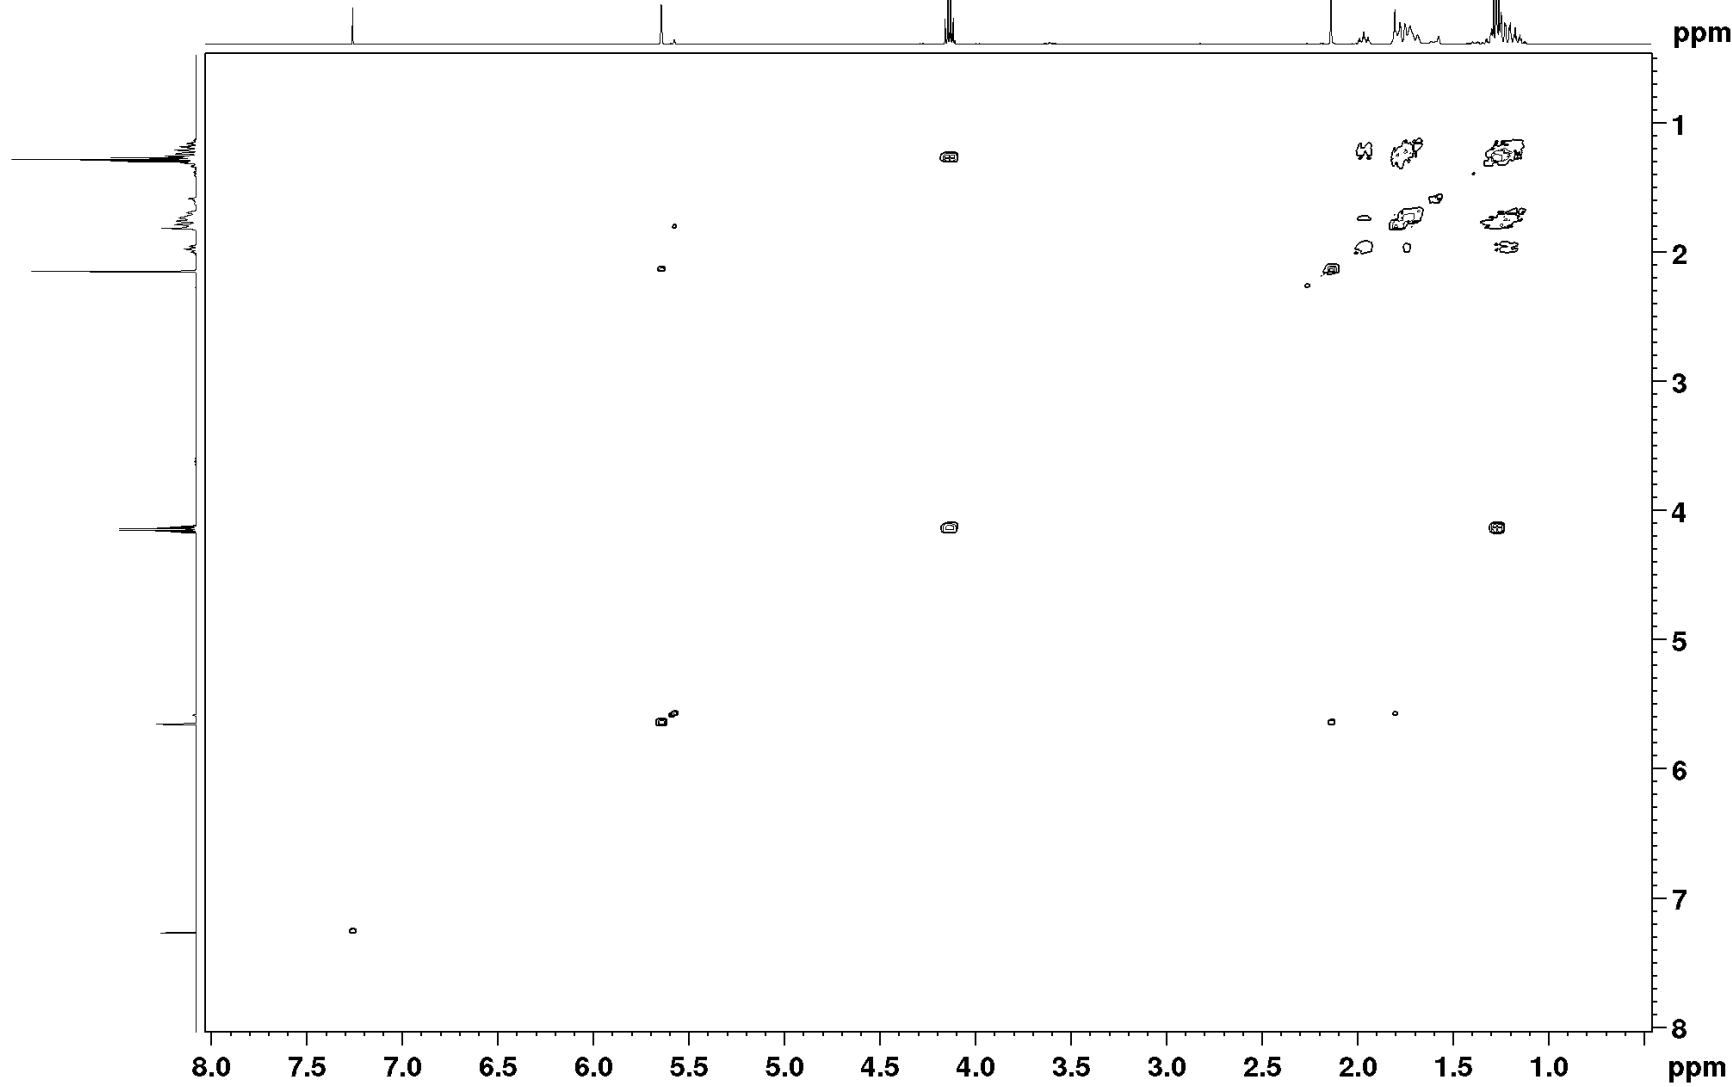

$^1\text{H}$ - $^{13}\text{C}$  HSQC

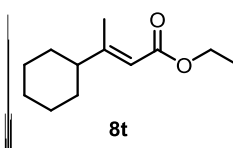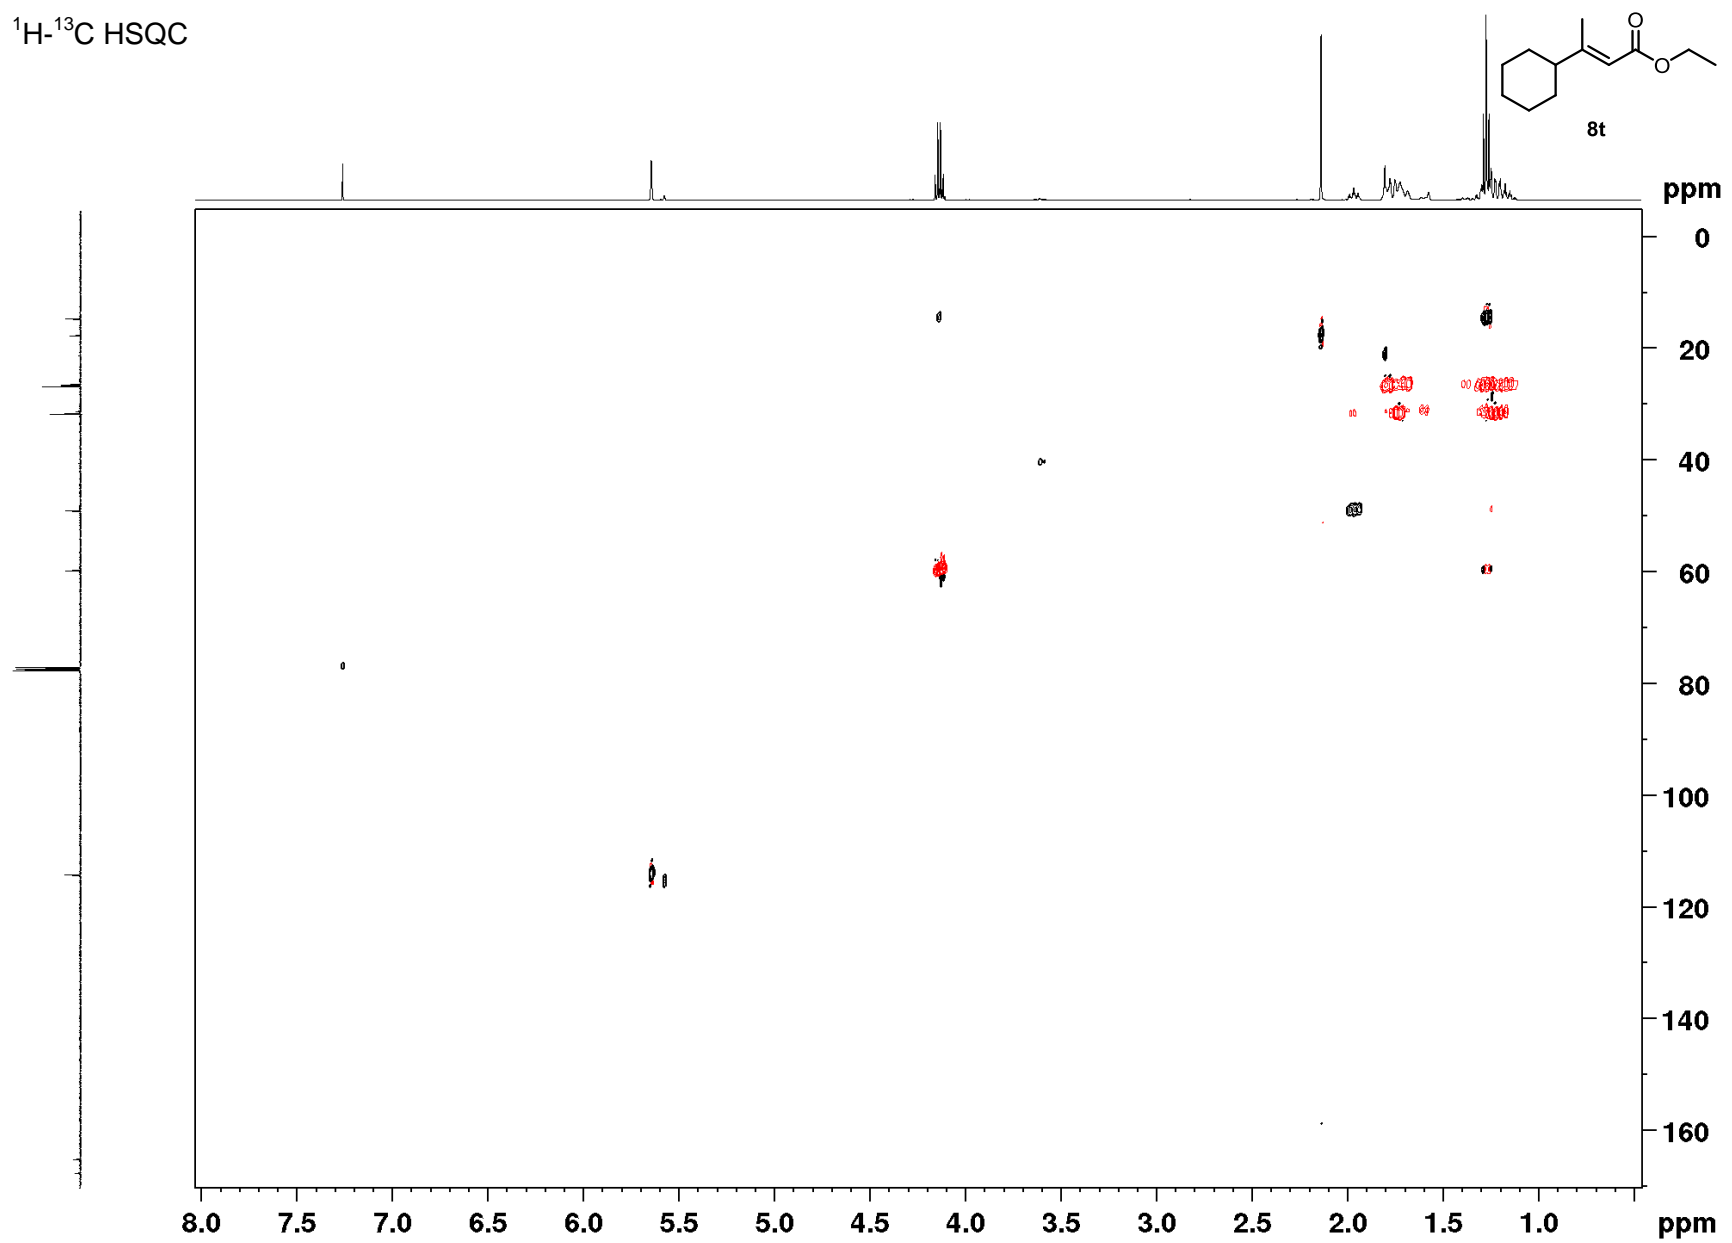

$^1\text{H}$ - $^{13}\text{C}$  HMBC

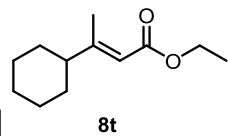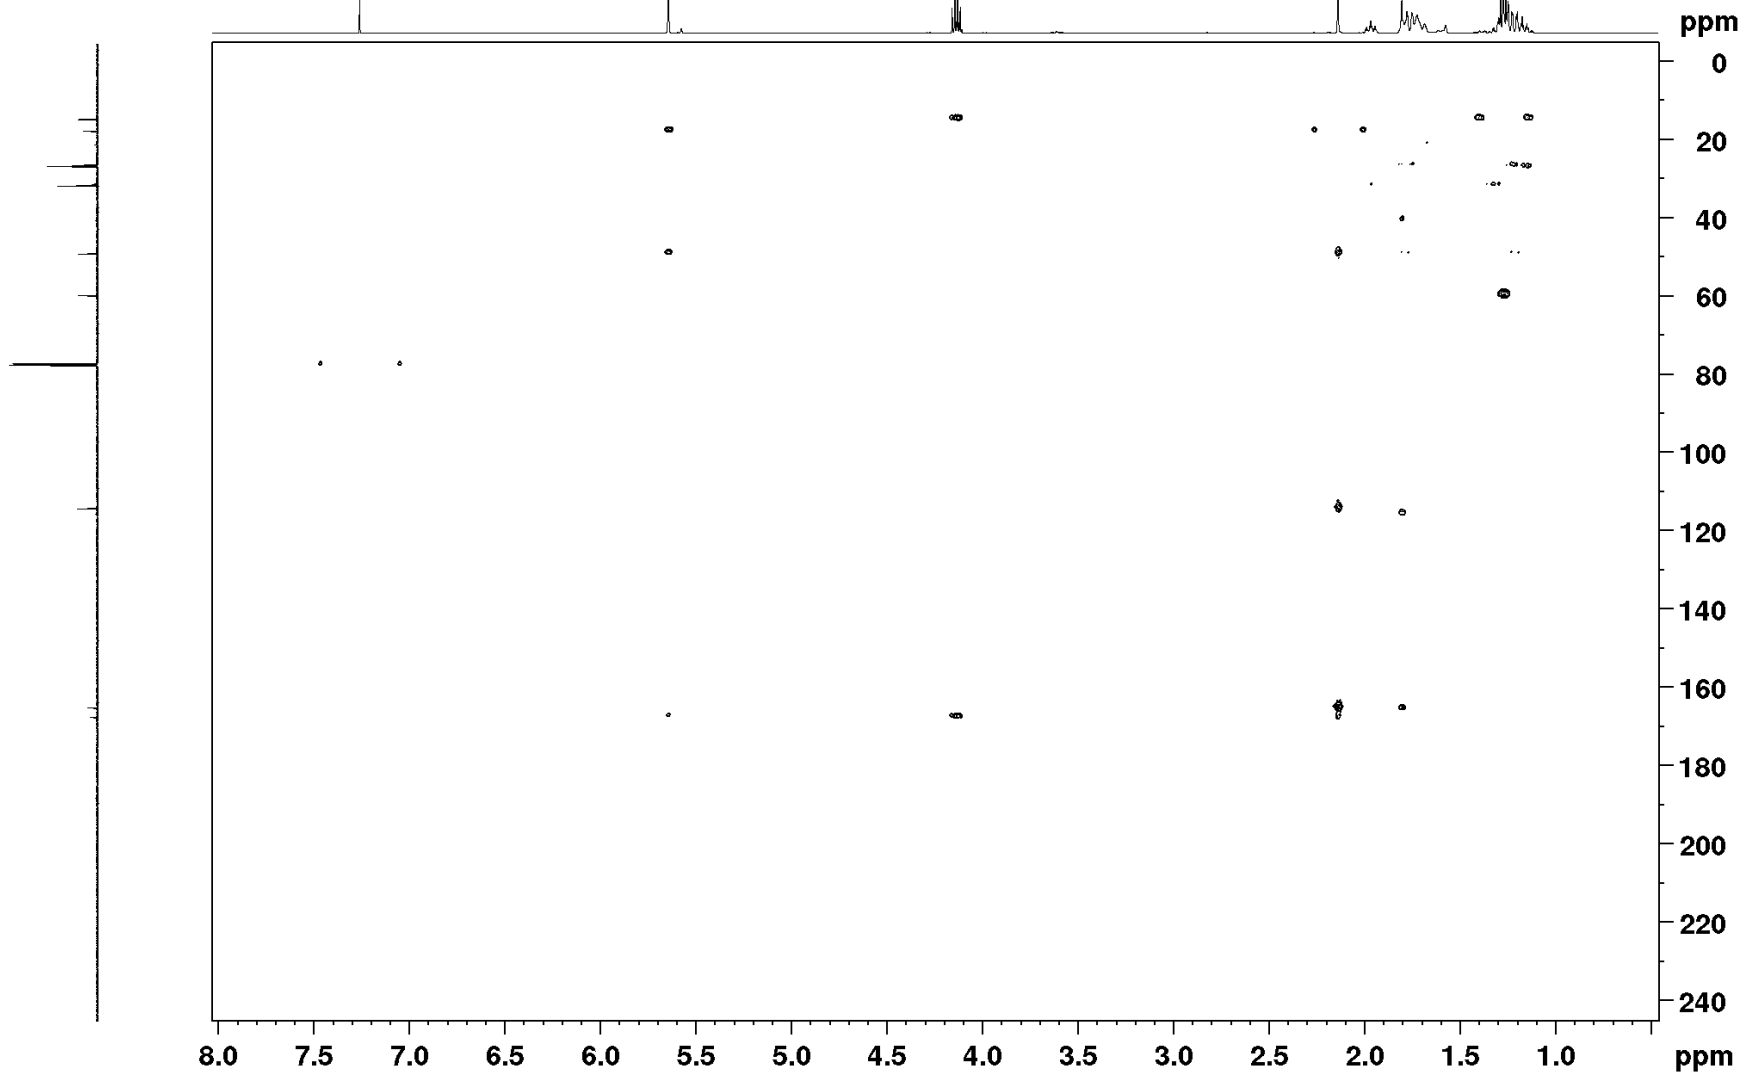

$^1\text{H}$ - $^1\text{H}$  NOESY

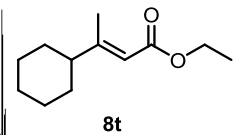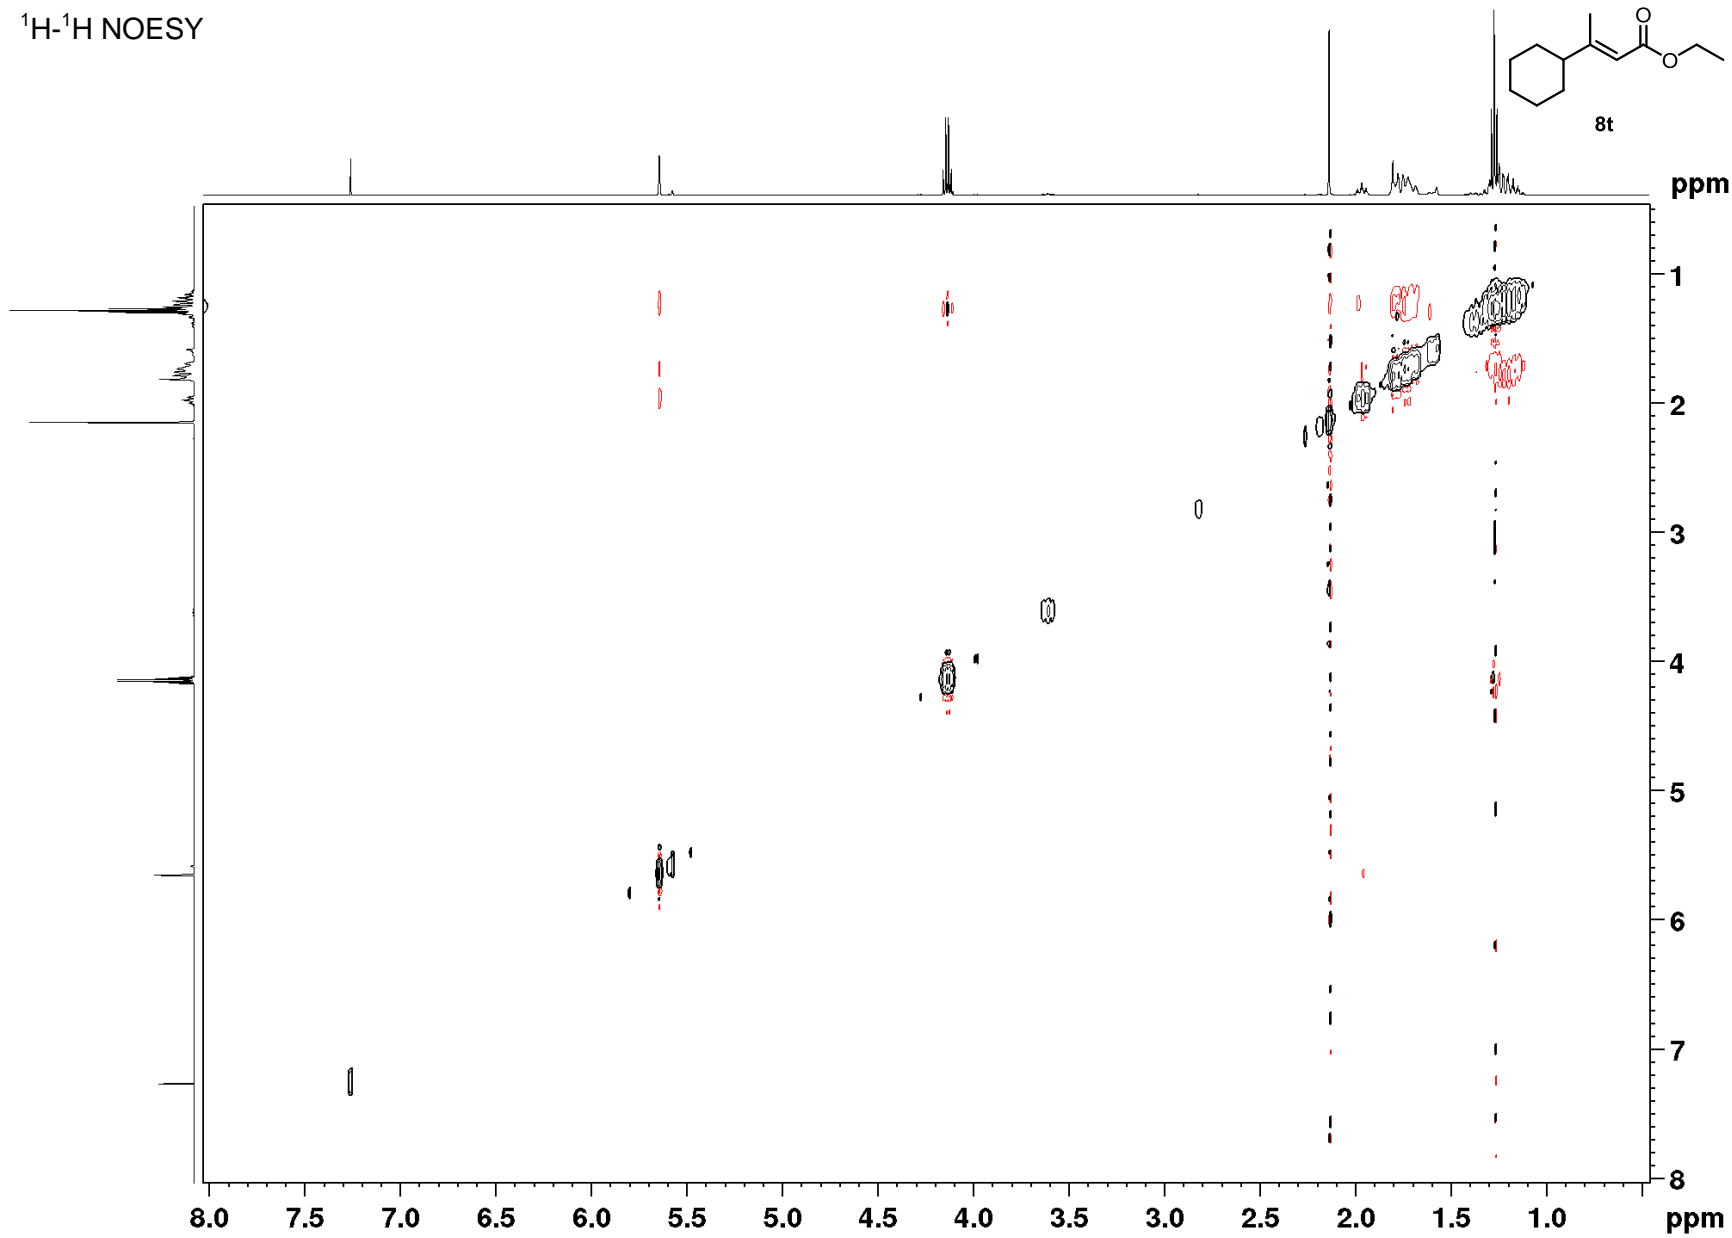

S475

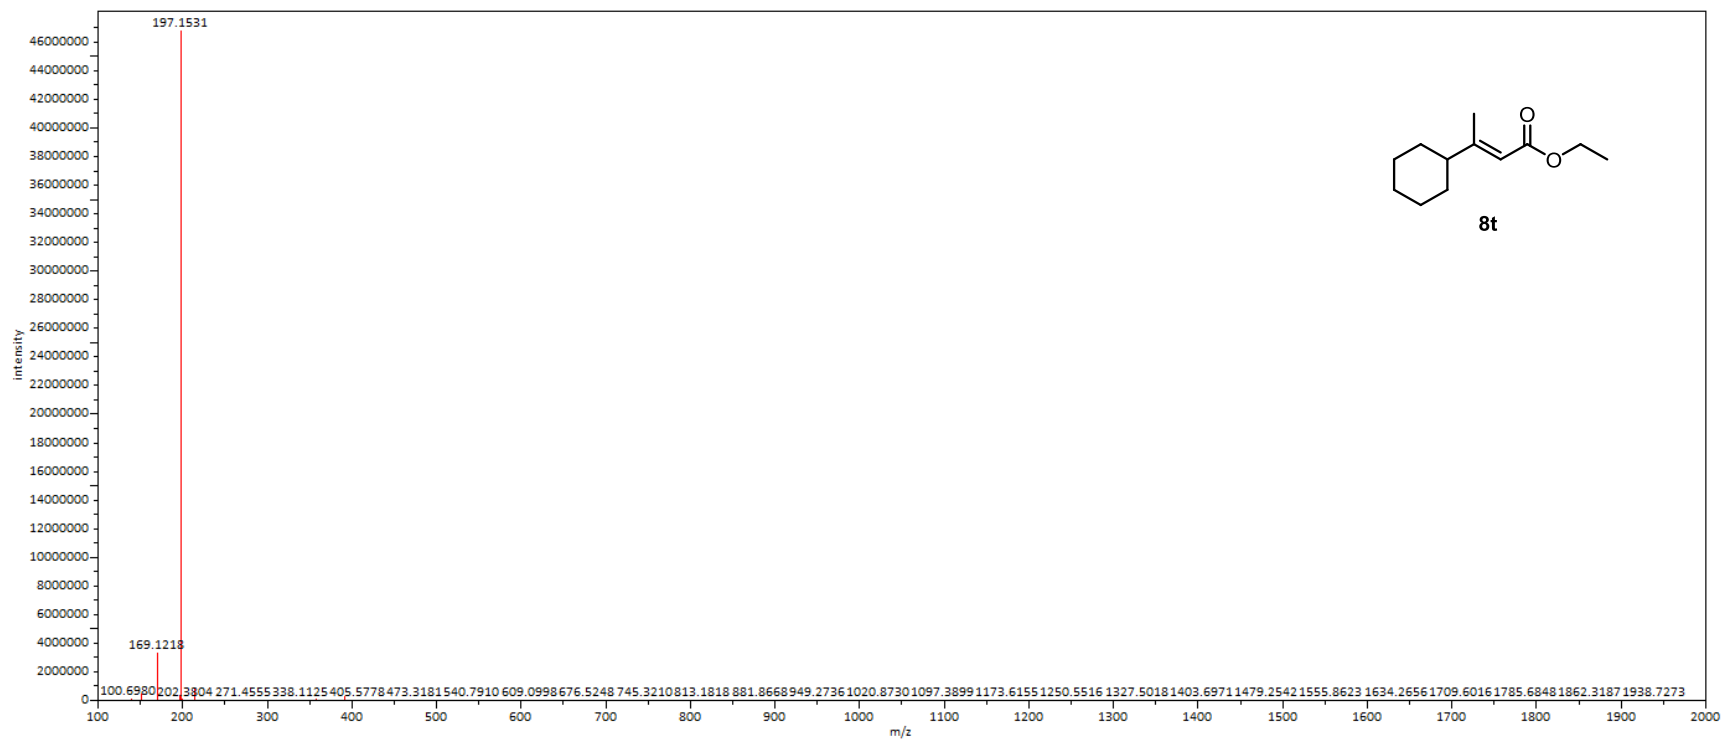



Ethyl (*E*)-3-methylundec-2-enoate (**8u**)

<sup>1</sup>H NMR

5.66  
5.65  
5.65  
5.65

4.16  
4.15  
4.13  
4.12

2.15  
2.14  
2.14  
2.13  
2.12  
2.11  
2.10  
1.49  
1.48  
1.46  
1.45  
1.44  
1.43  
1.42  
1.30  
1.30  
1.29  
1.28  
1.27  
1.26  
1.25  
0.89  
0.88  
0.87

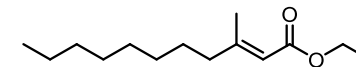

**8u**

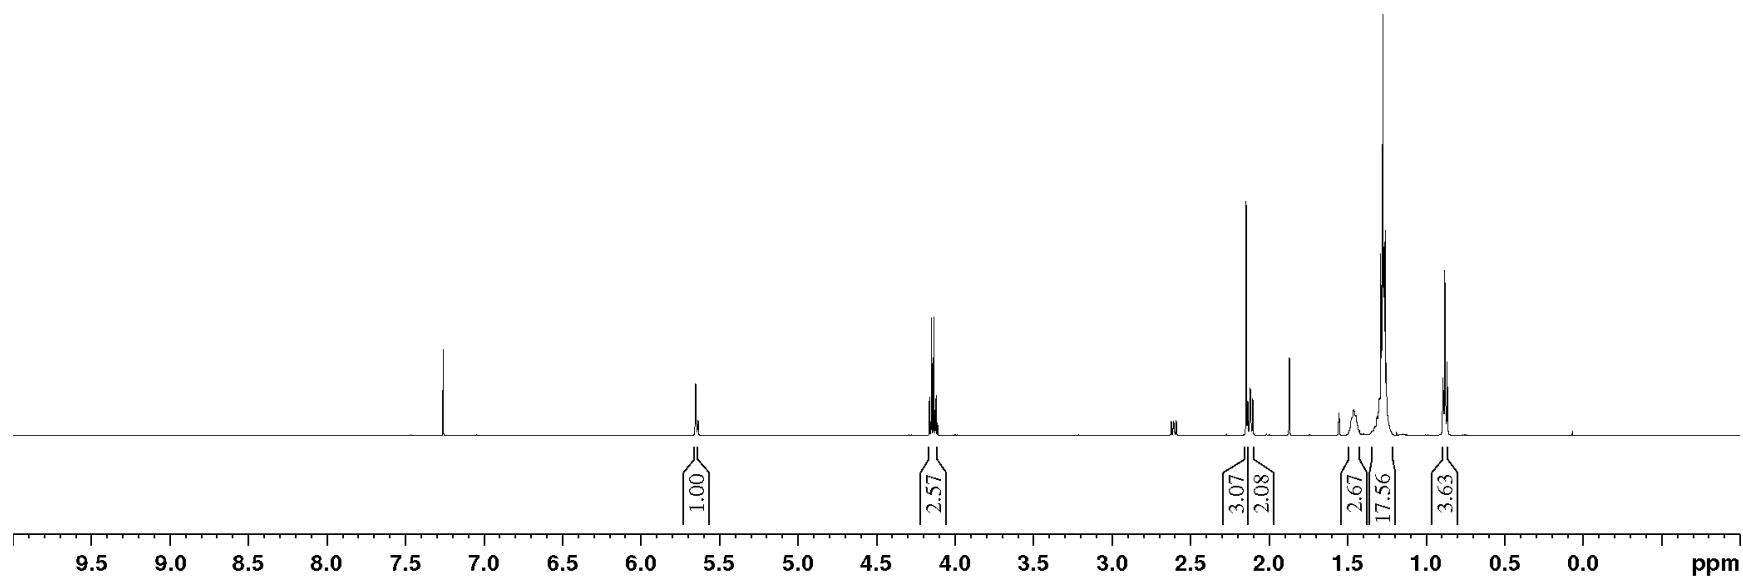

<sup>13</sup>C NMR

167.1  
160.9  
160.5

116.1  
115.5

59.5  
59.5

41.1  
33.5  
32.0  
29.9  
29.6  
29.5  
29.4  
29.3  
28.4  
27.5  
25.3  
22.8  
18.8  
14.5  
14.2

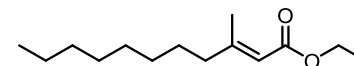

8u

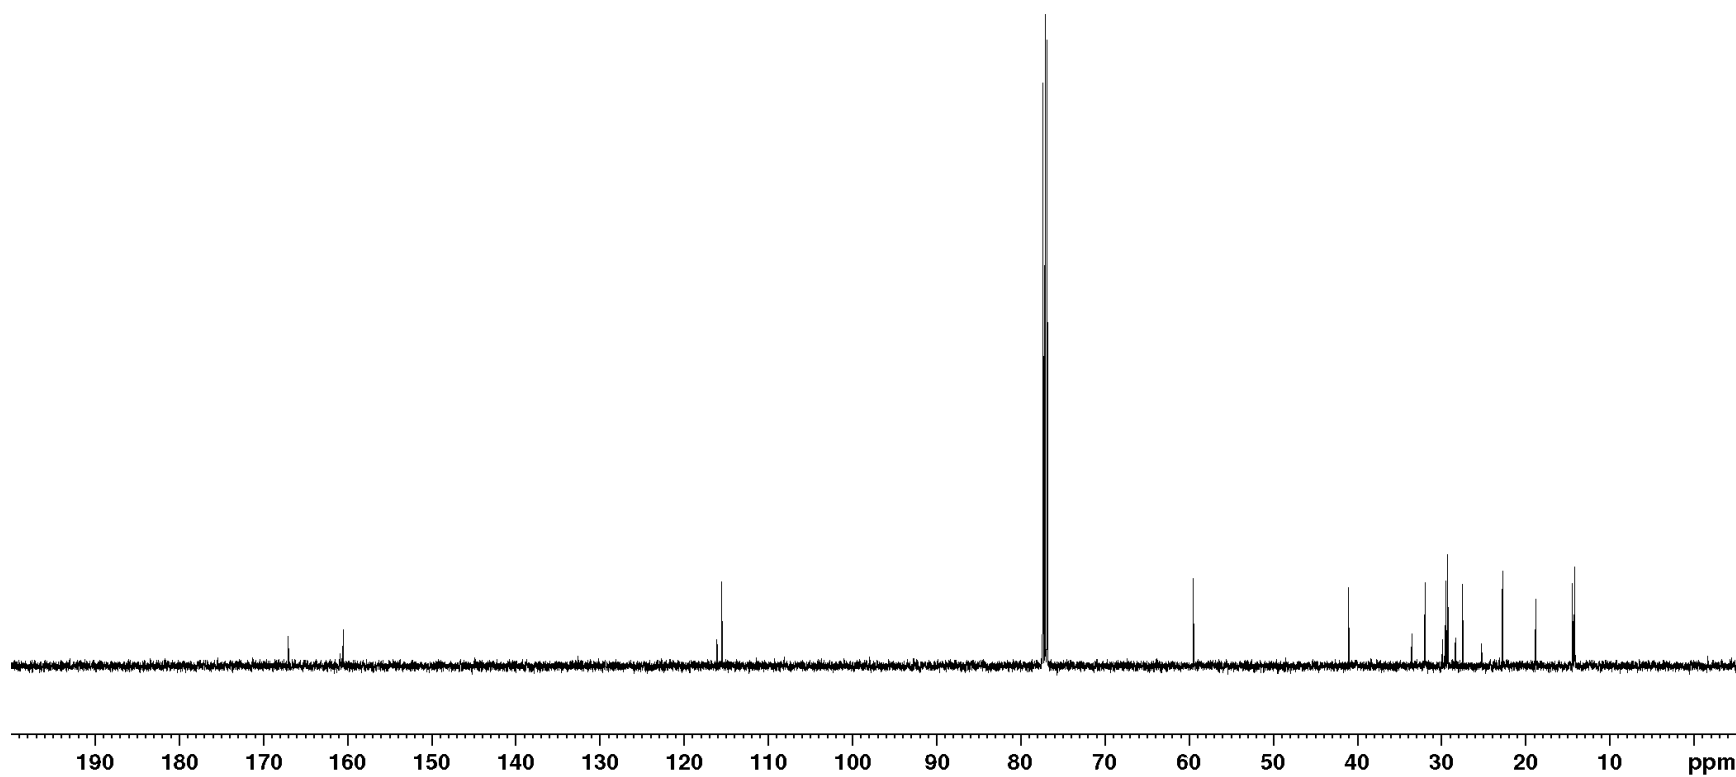

$^1\text{H}$ - $^1\text{H}$  COSY

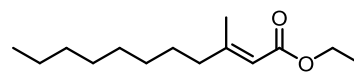

8u

ppm

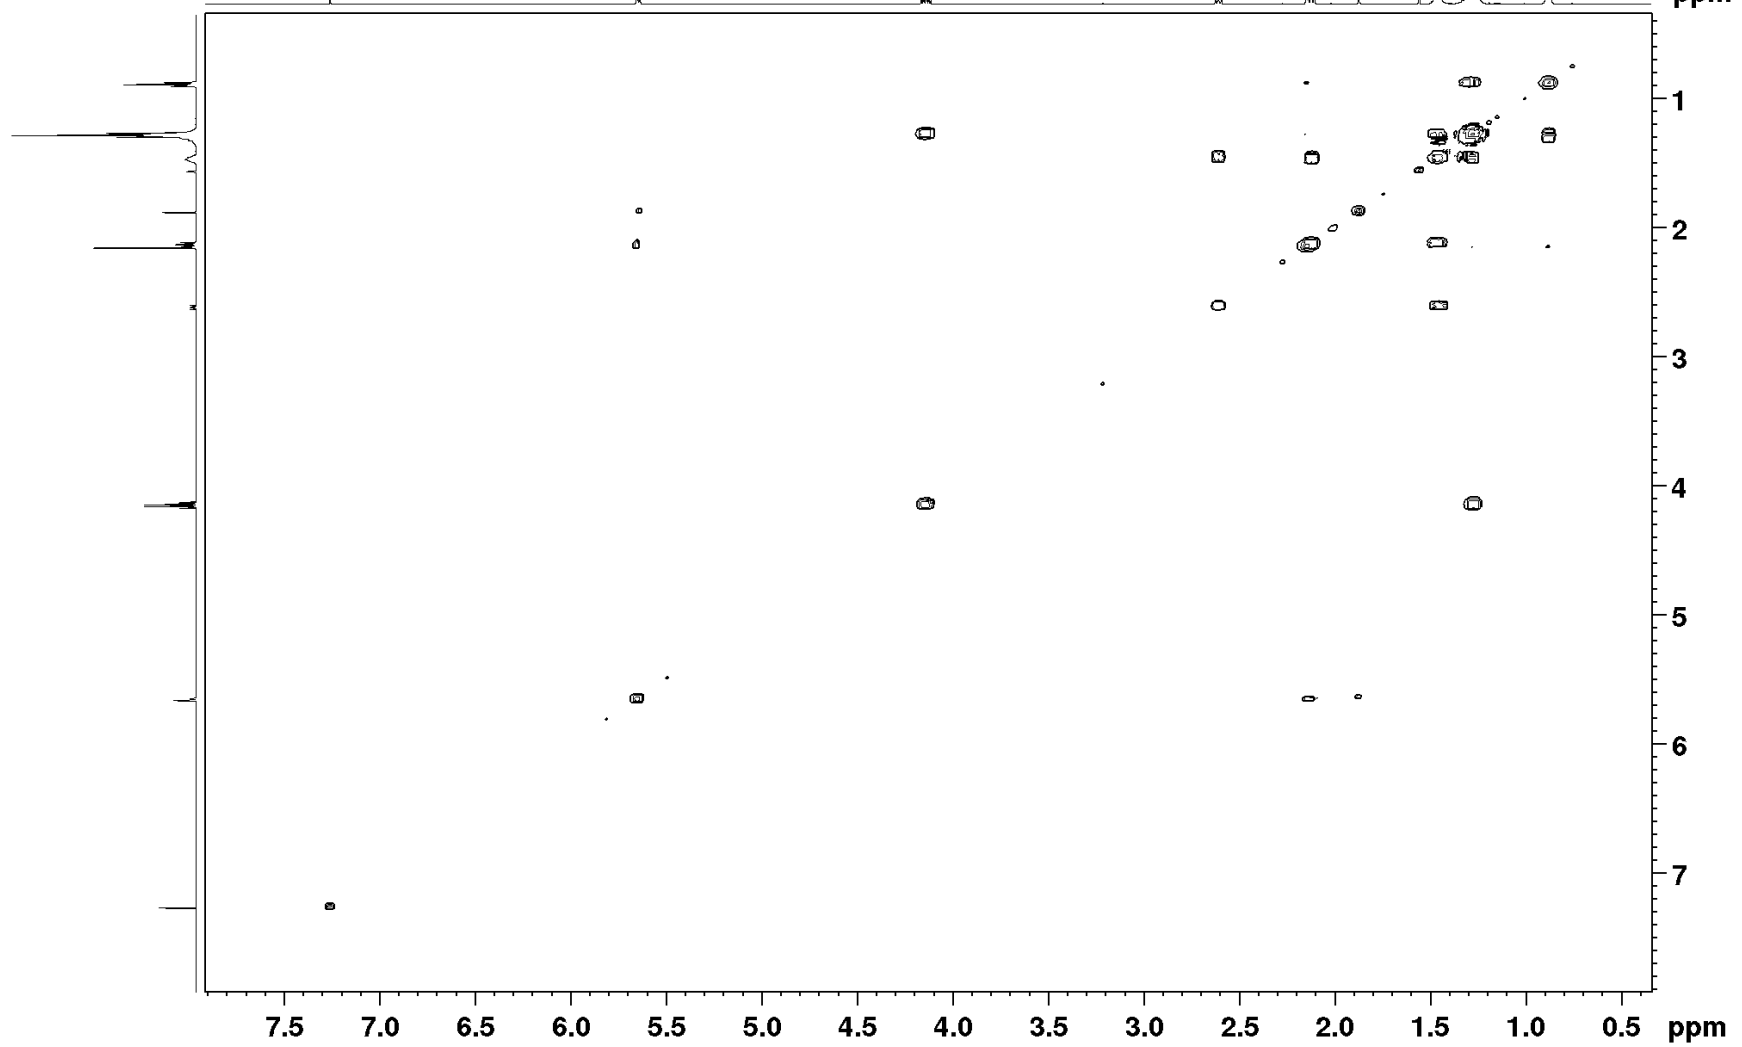

S479

$^1\text{H}$ - $^{13}\text{C}$  HSQC

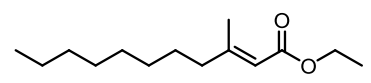

8u

ppm

0  
20  
40  
60  
80  
100  
120  
140  
160

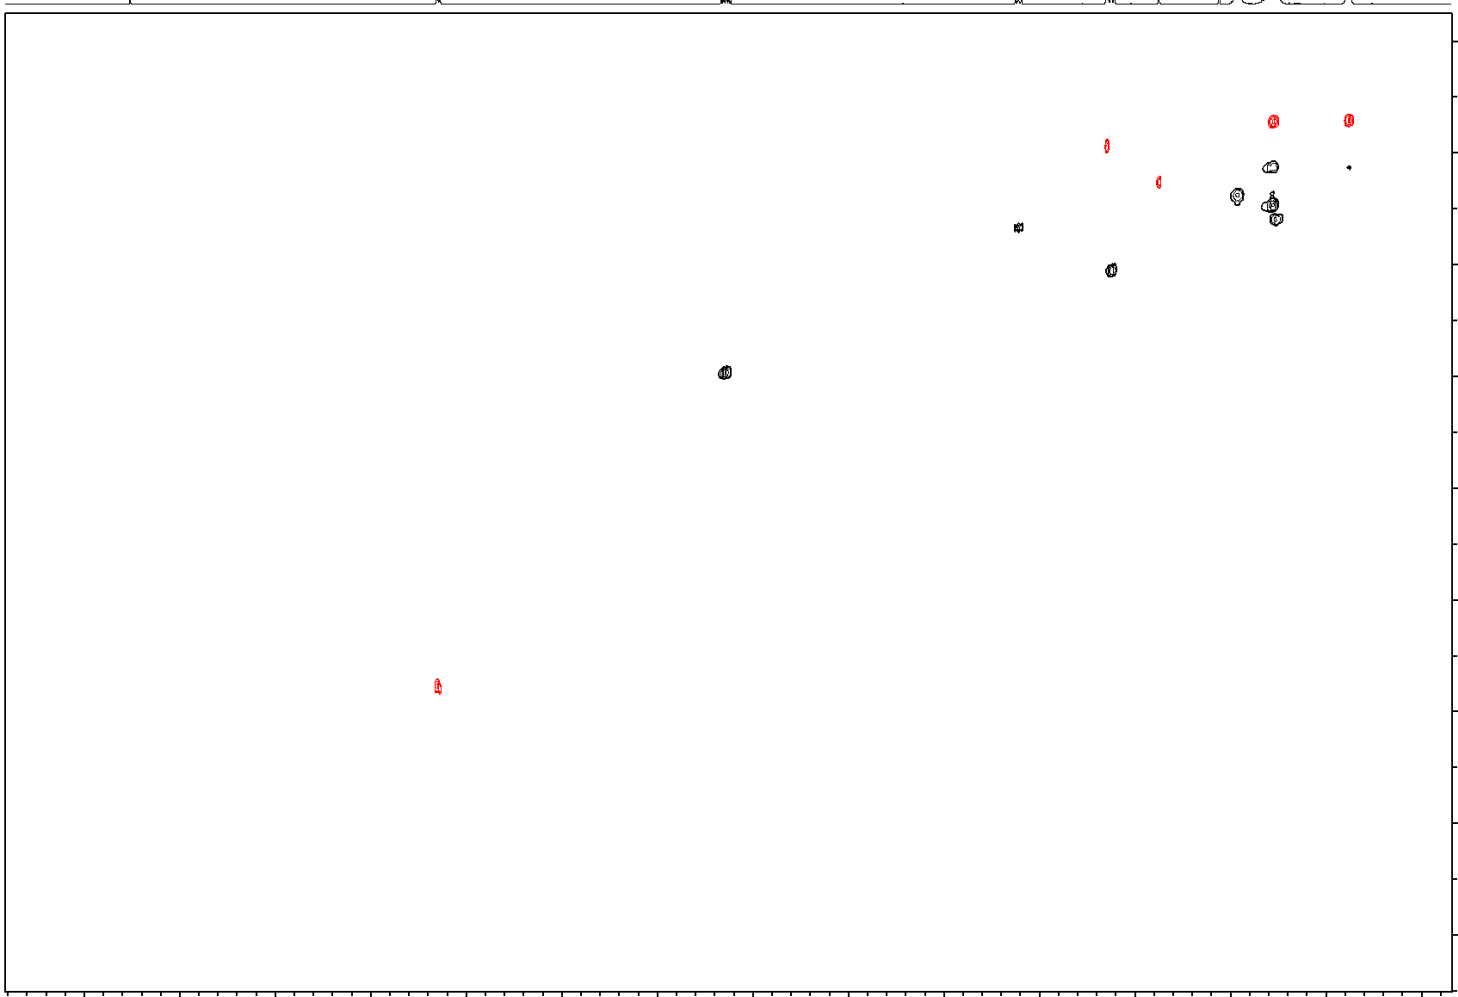

S480



$^1\text{H}$ - $^1\text{H}$  NOESY

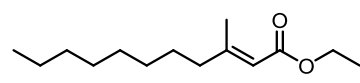

8u

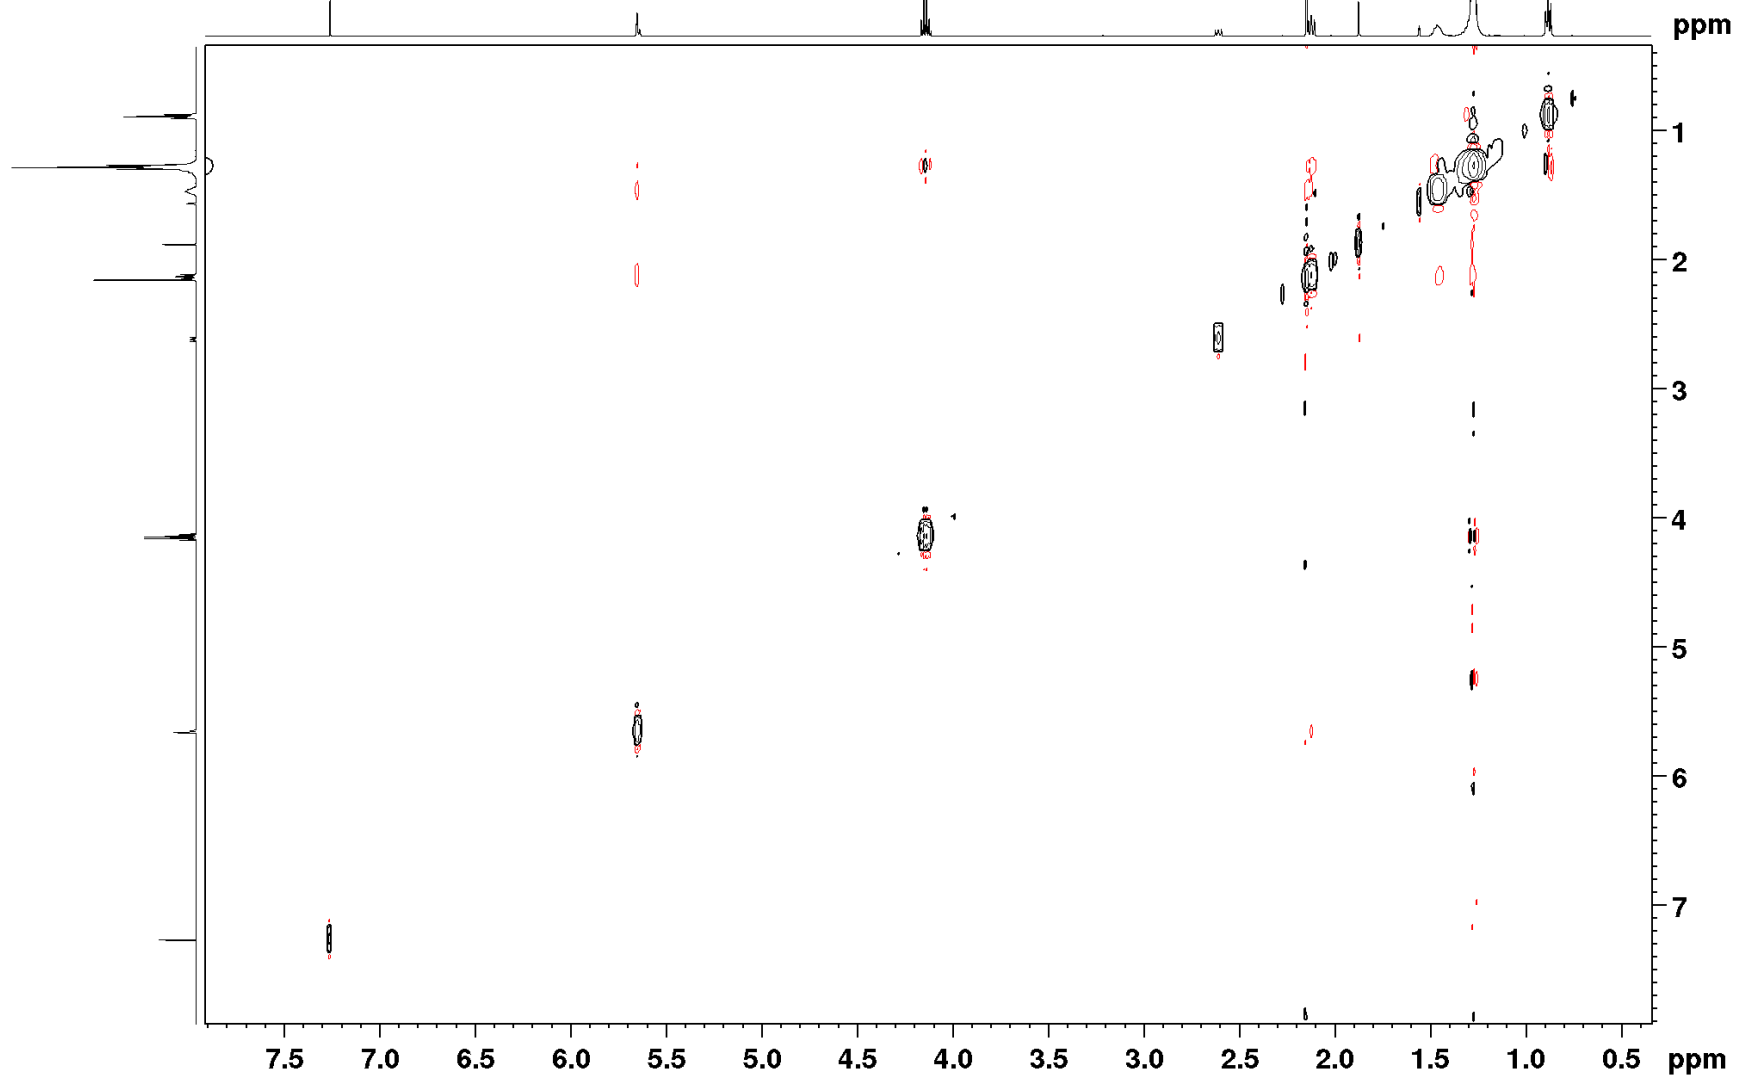

S482

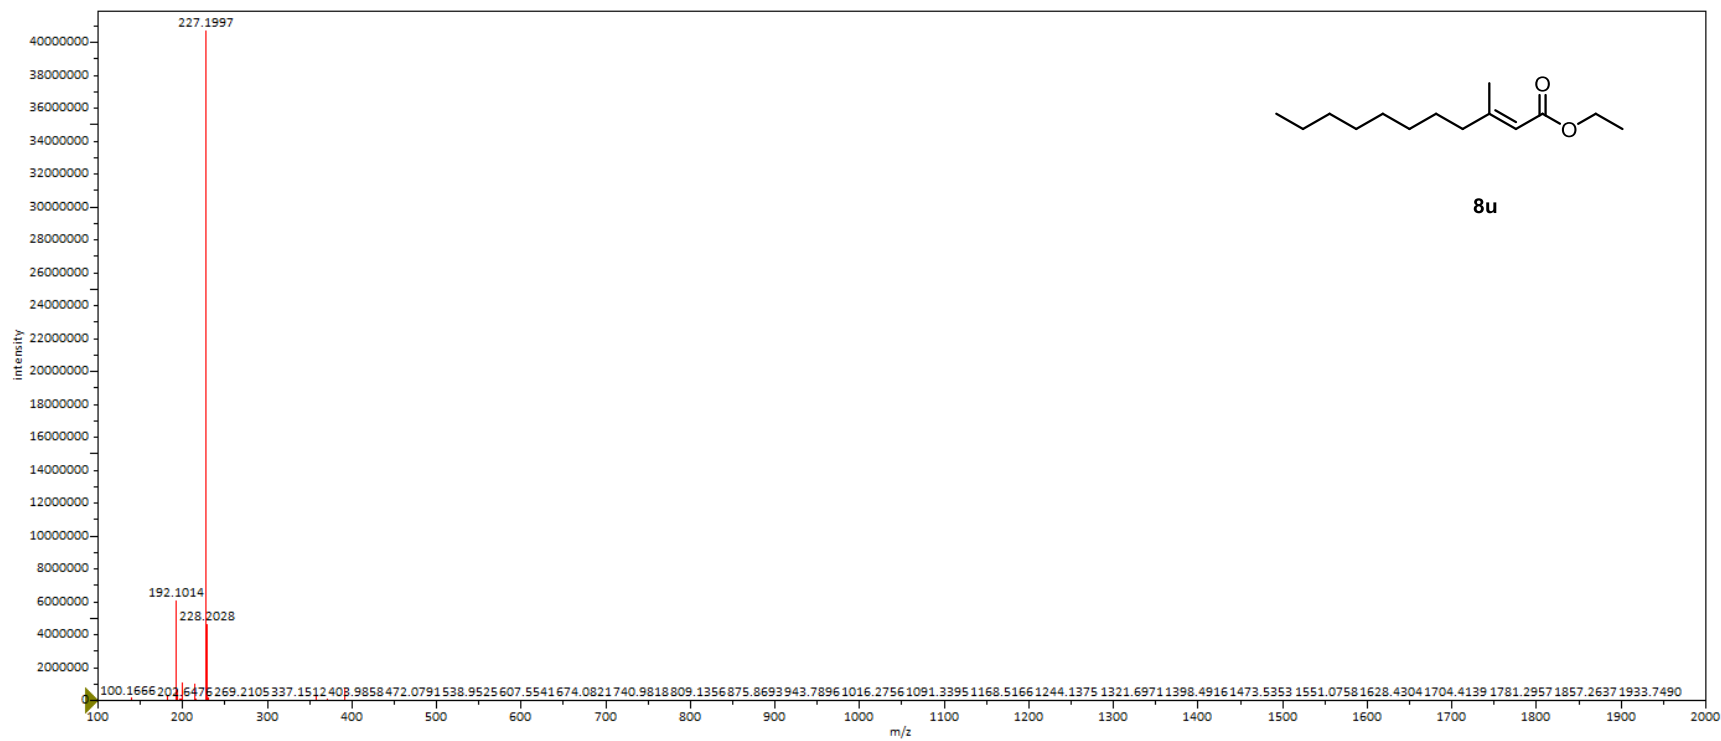

S483

**(E)-N,N-diethyl-3-phenylbut-2-enamide (10)**

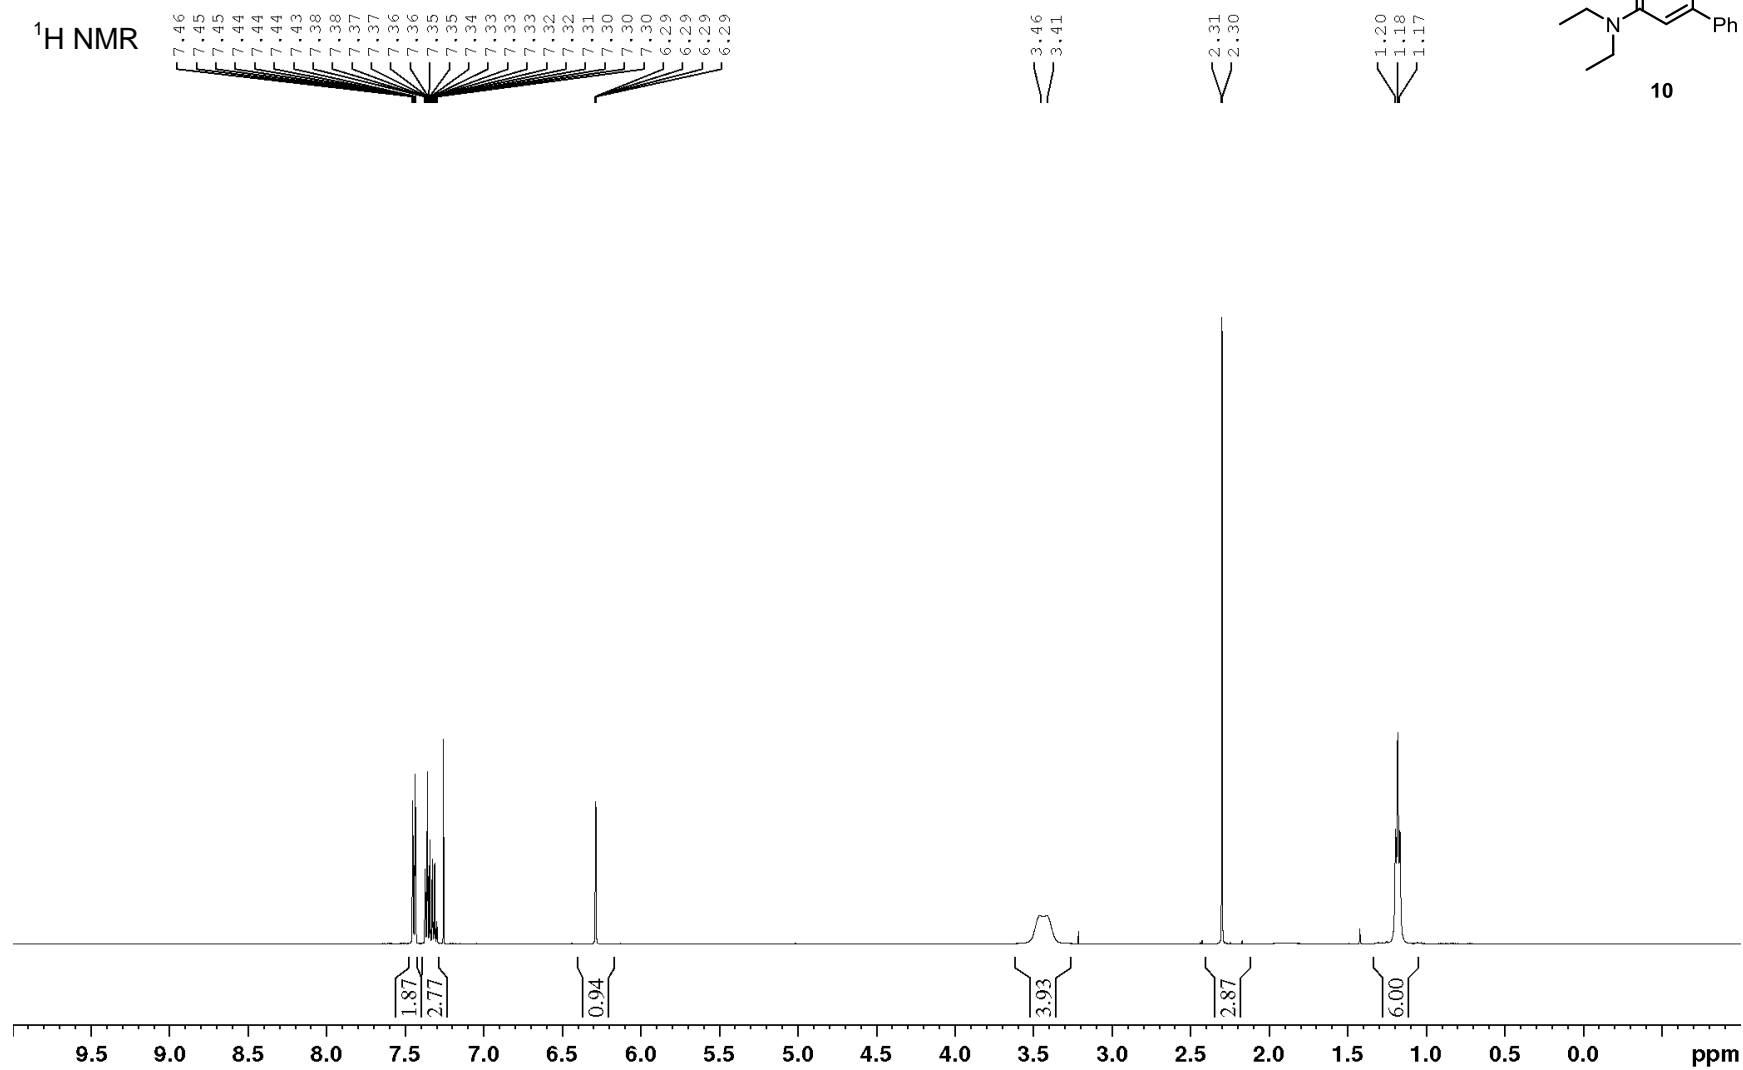



<sup>13</sup>C NMR

167.8

145.6

142.3

128.5

128.2

126.1

120.3

18.0

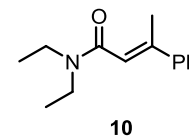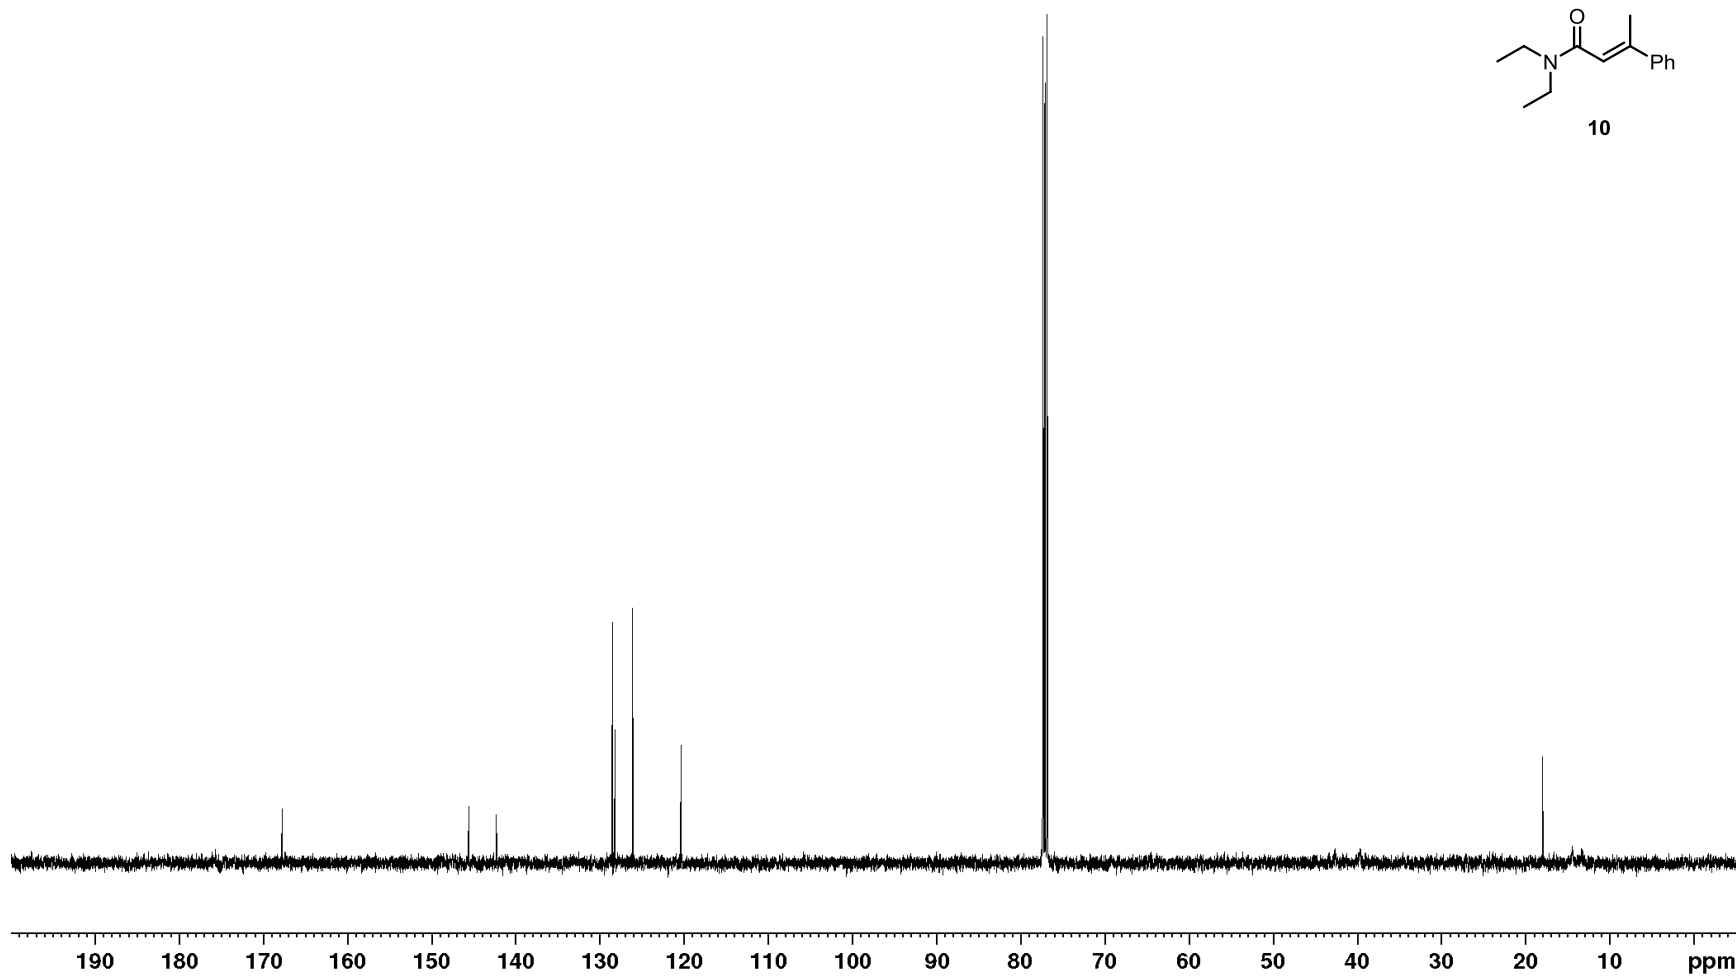

<sup>13</sup>C DEPT NMR

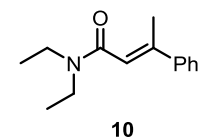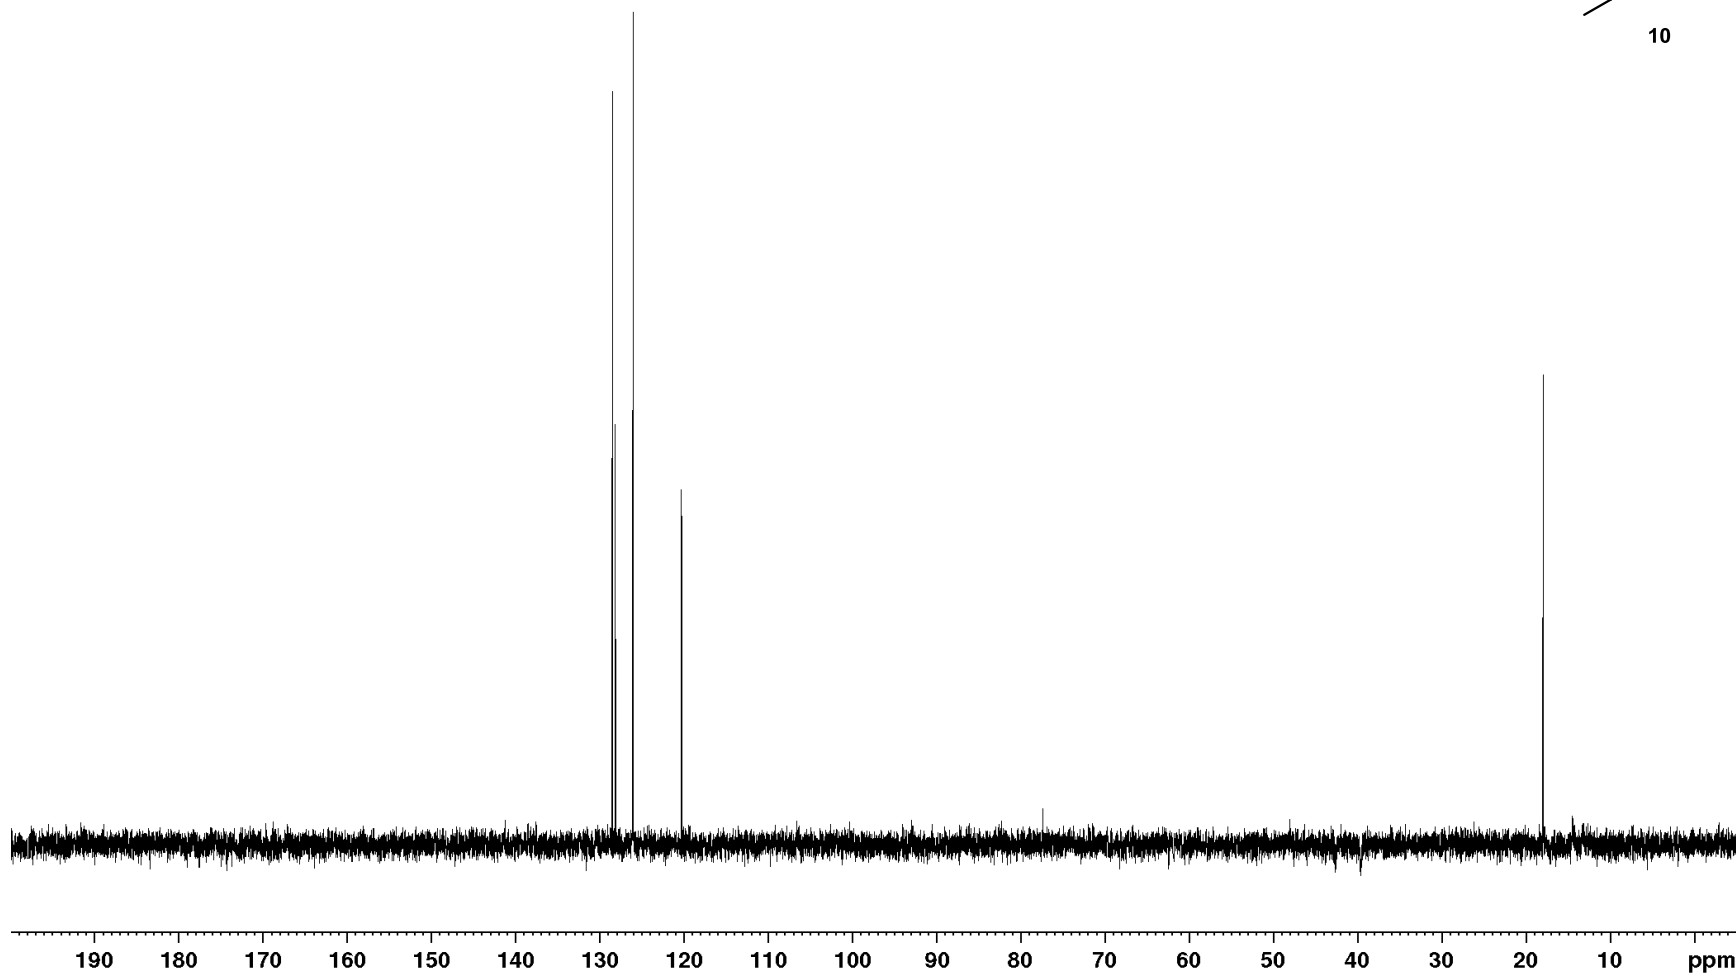

<sup>1</sup>H-<sup>1</sup>H COSY

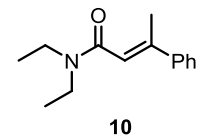

ppm

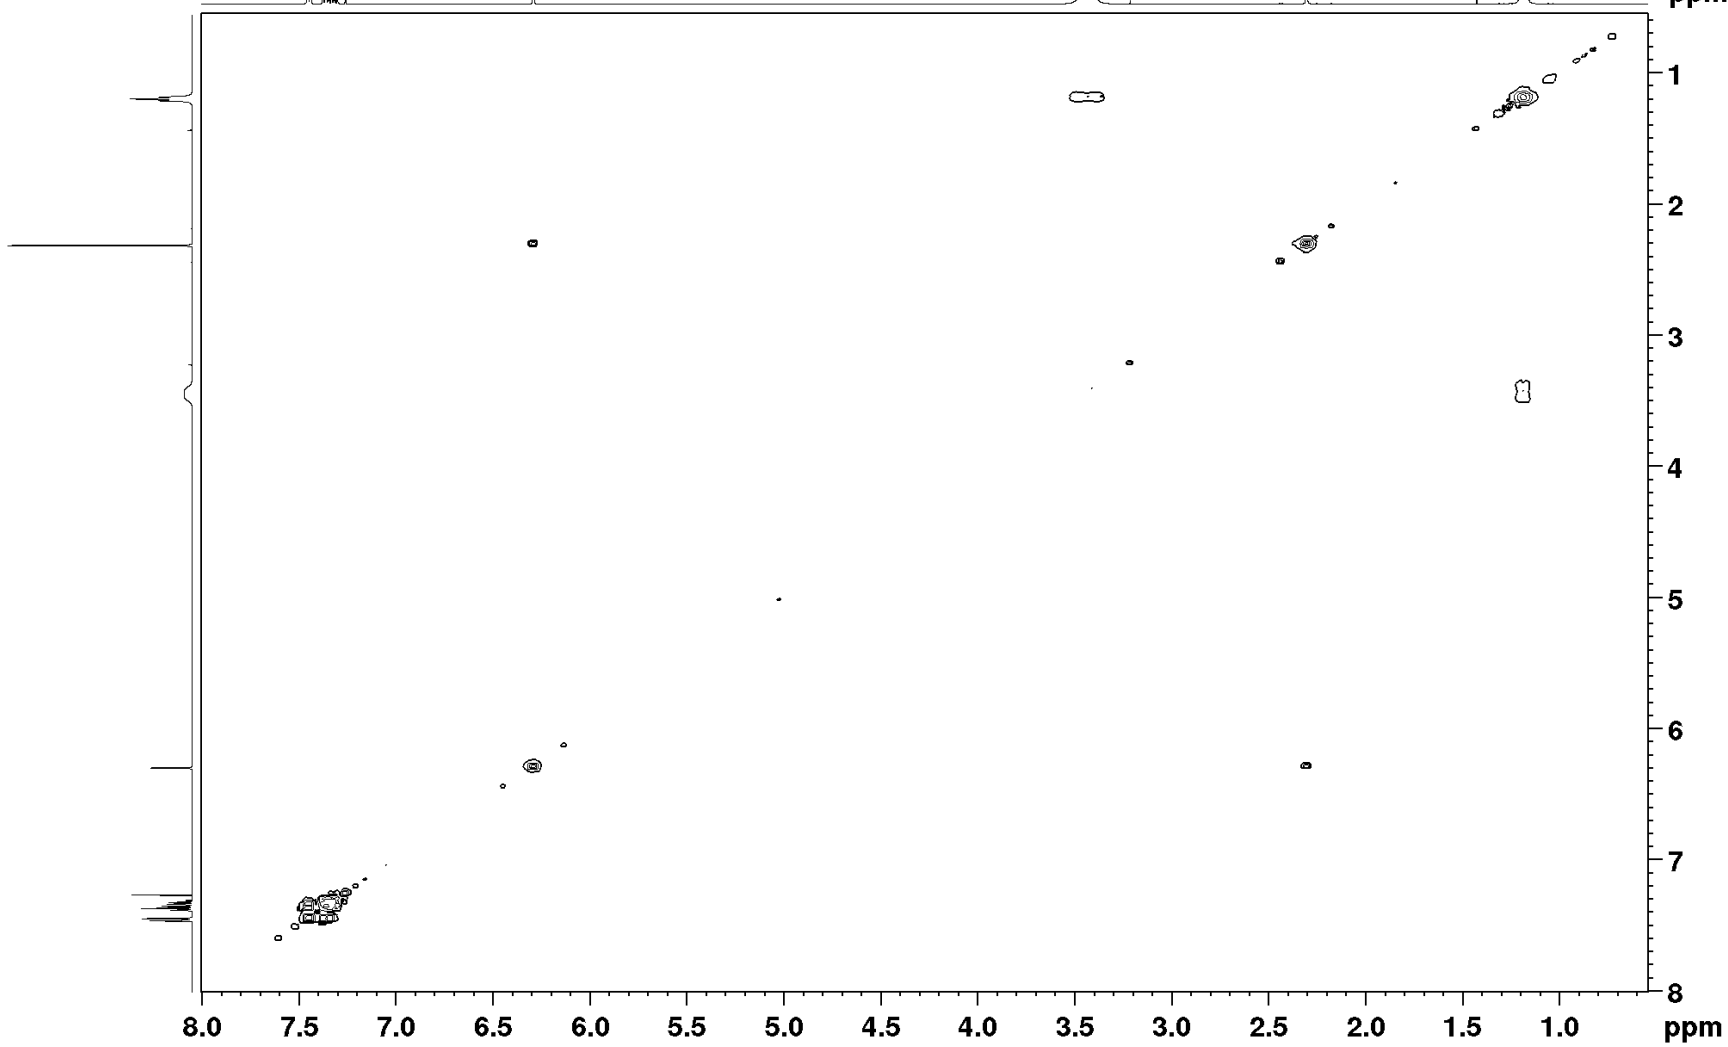

$^1\text{H}$ - $^{13}\text{C}$  HMQC

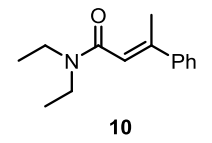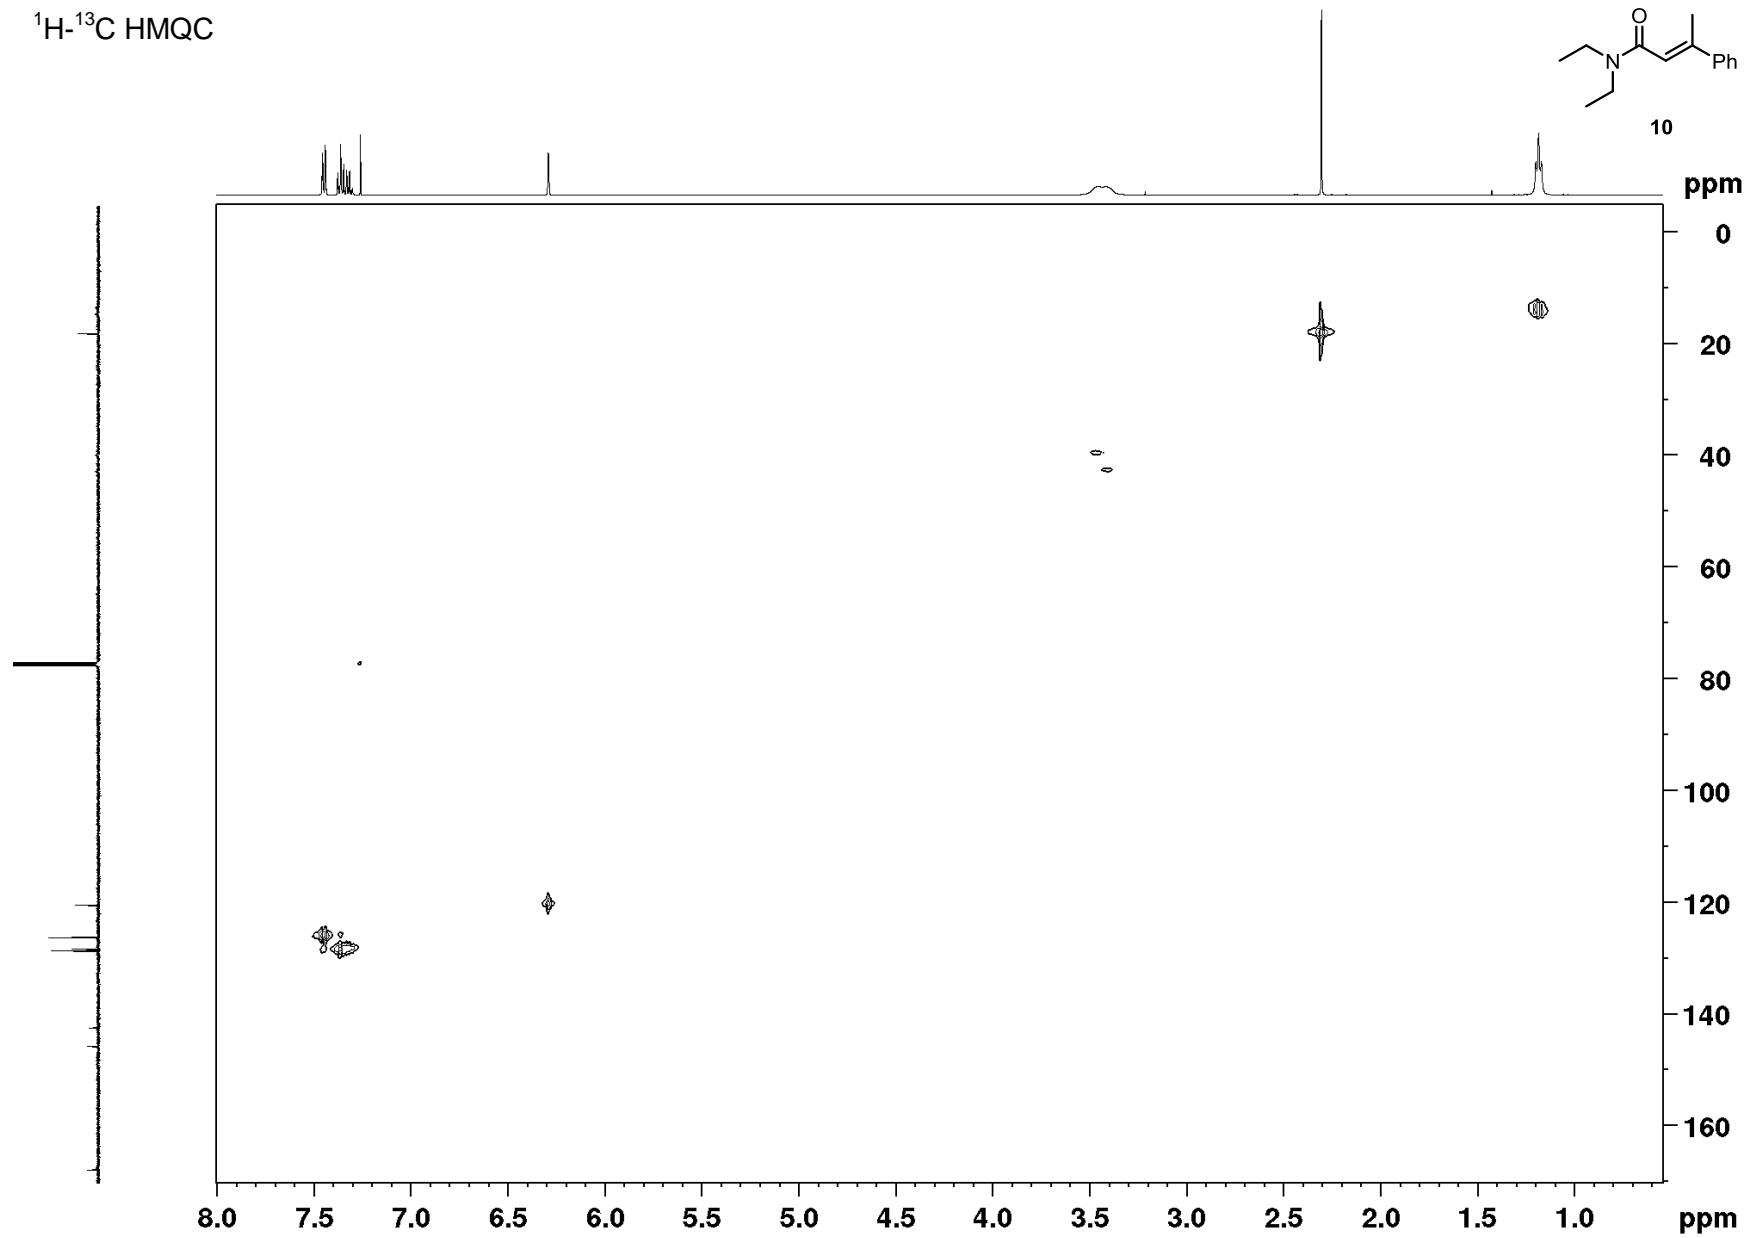

$^1\text{H}$ - $^{13}\text{C}$  HMBC

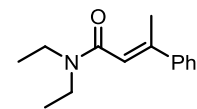

10

ppm

0

20

40

60

80

100

120

140

160

180

200

220

240

ppm

8.0

7.5

7.0

6.5

6.0

5.5

5.0

4.5

4.0

3.5

3.0

2.5

2.0

1.5

1.0

S489

$^1\text{H}$ - $^1\text{H}$  NOESY

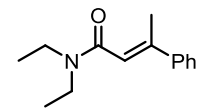

ppm

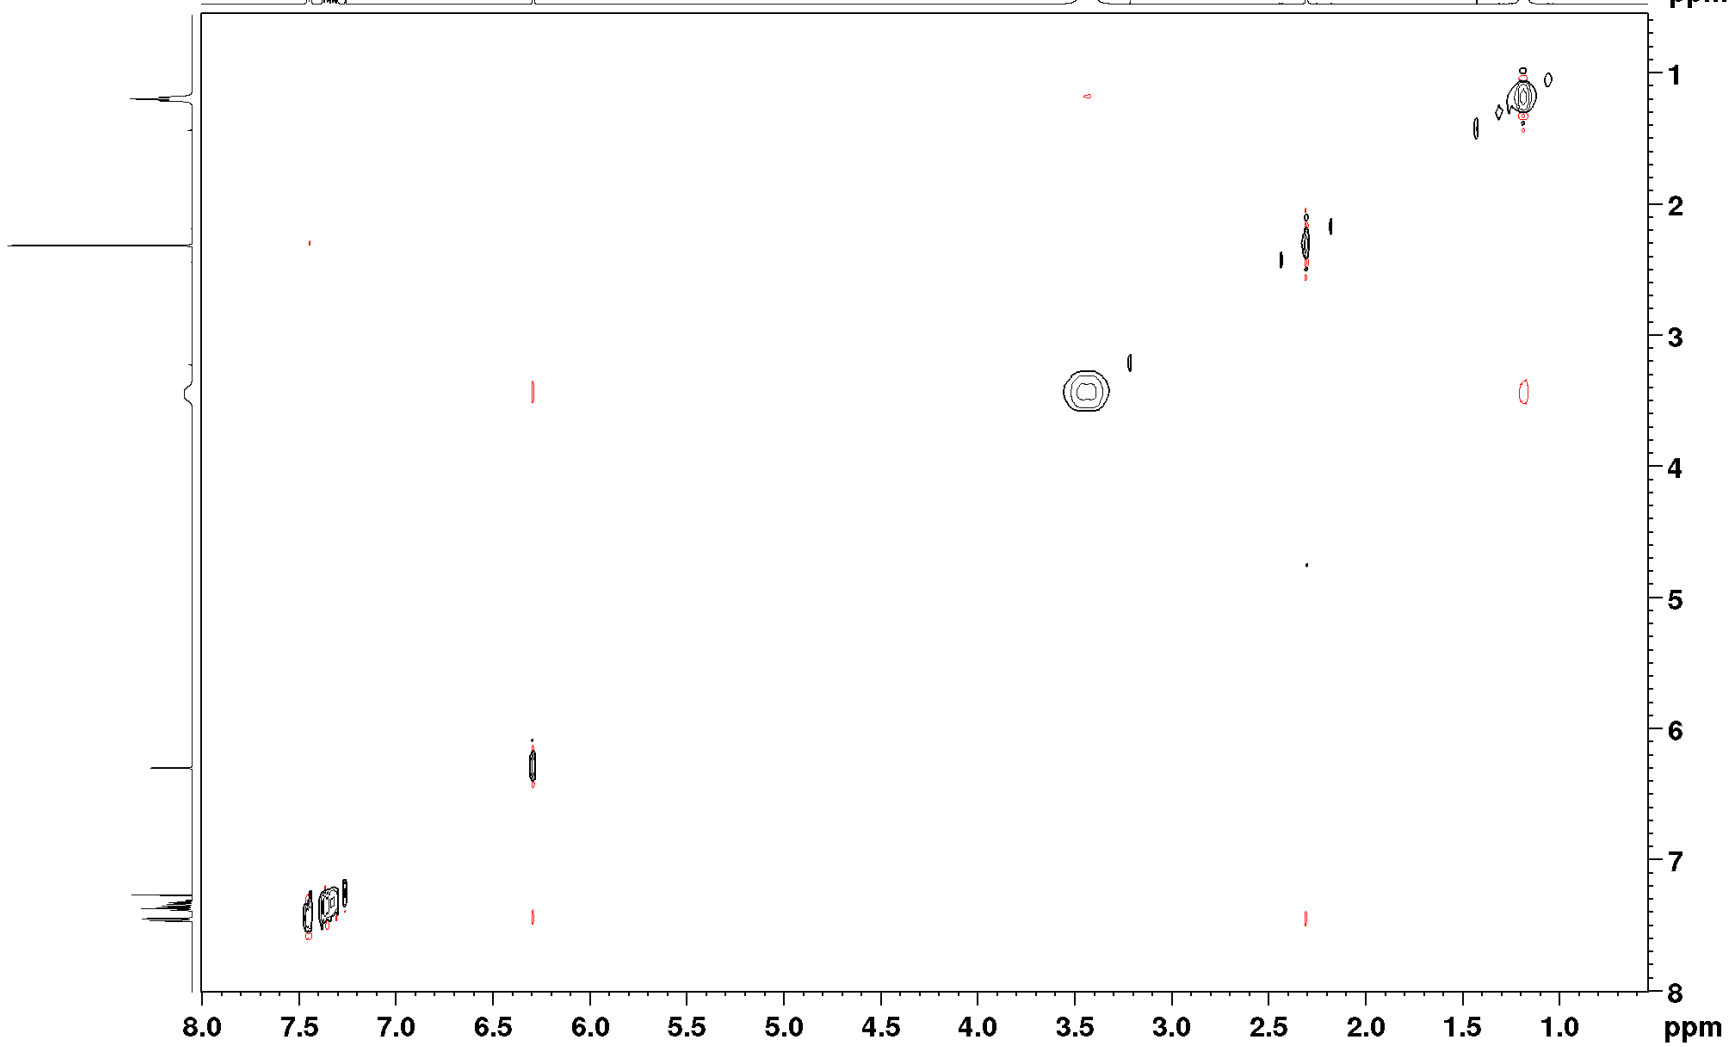

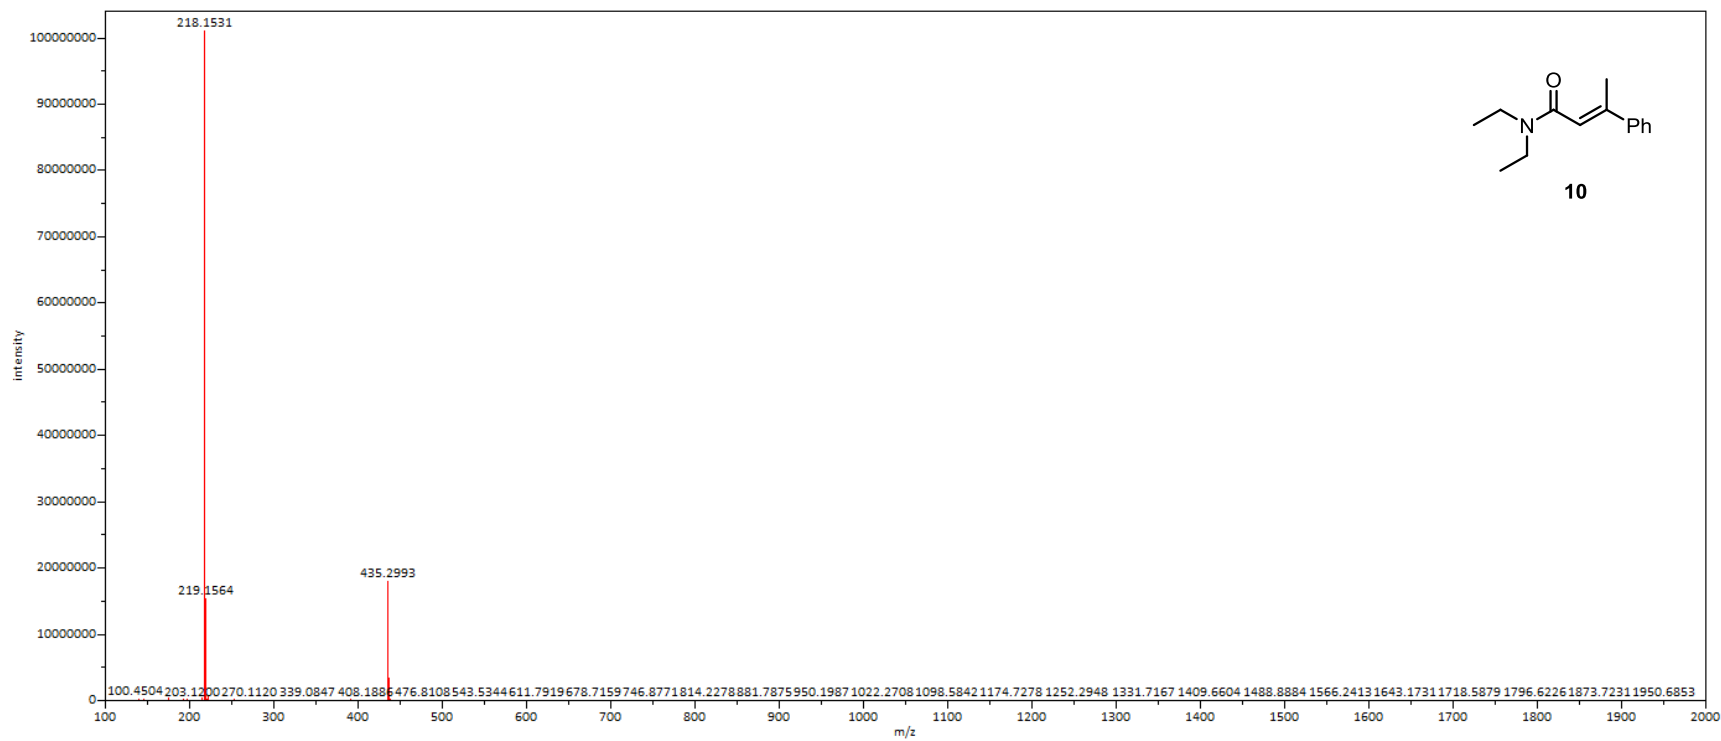

Ethyl (E)-3-cyclohexylbut-2-enoate (8t)

<sup>1</sup>H NMR

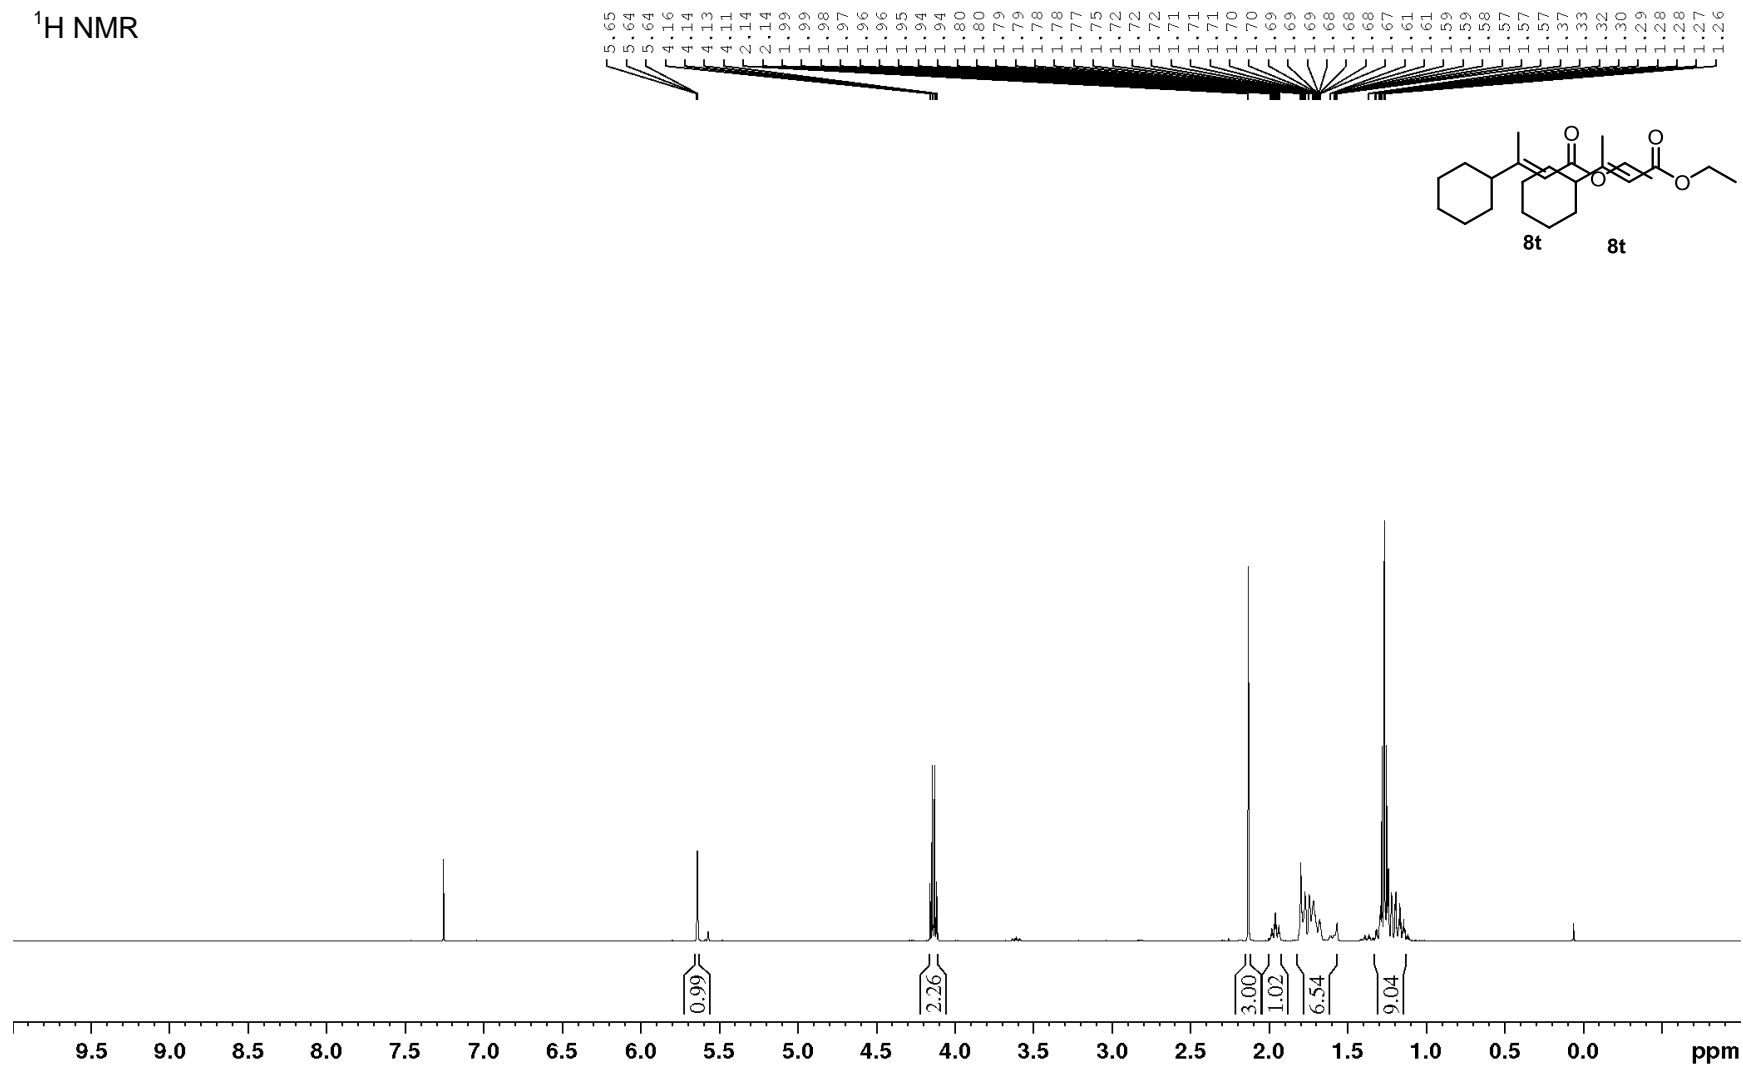



<sup>13</sup>C NMR

167.5  
165.0

114.1

59.6

48.9

31.5

26.6

26.3

17.5

14.5



$^1\text{H}$ - $^1\text{H}$  COSY

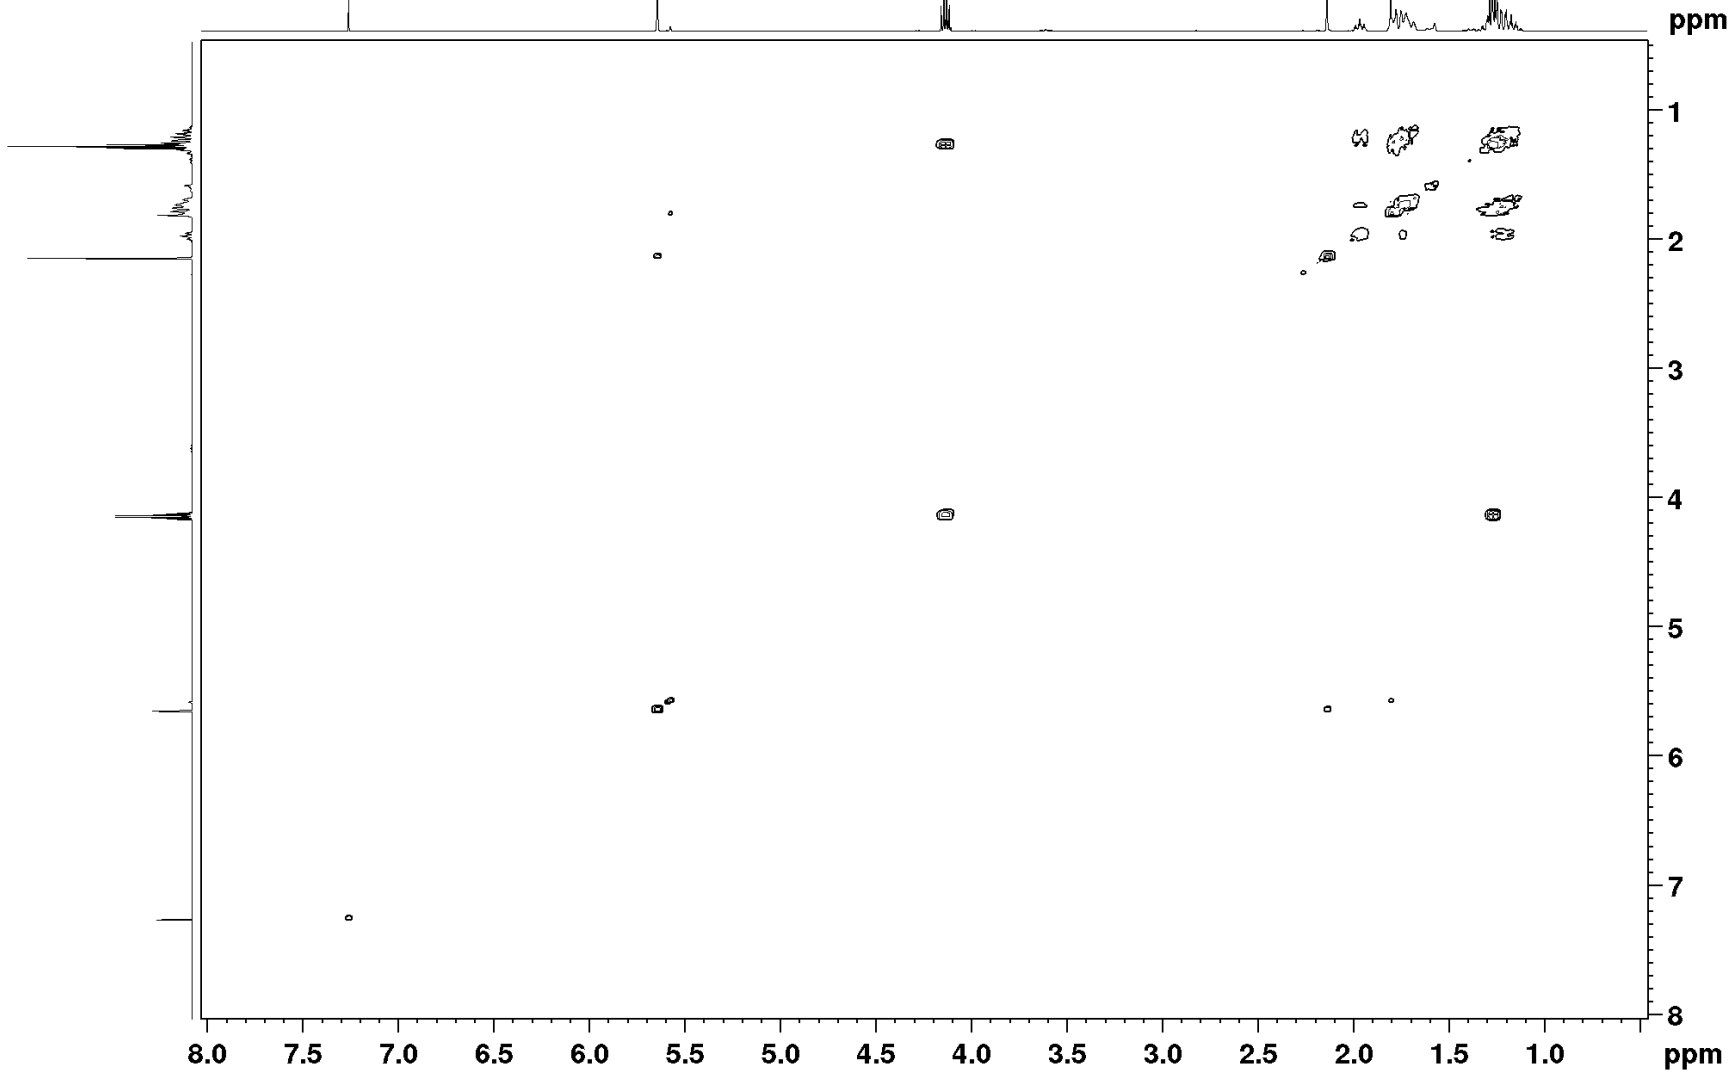

$^1\text{H}$ - $^{13}\text{C}$  HSQC

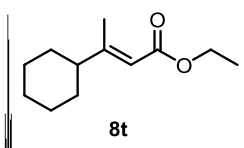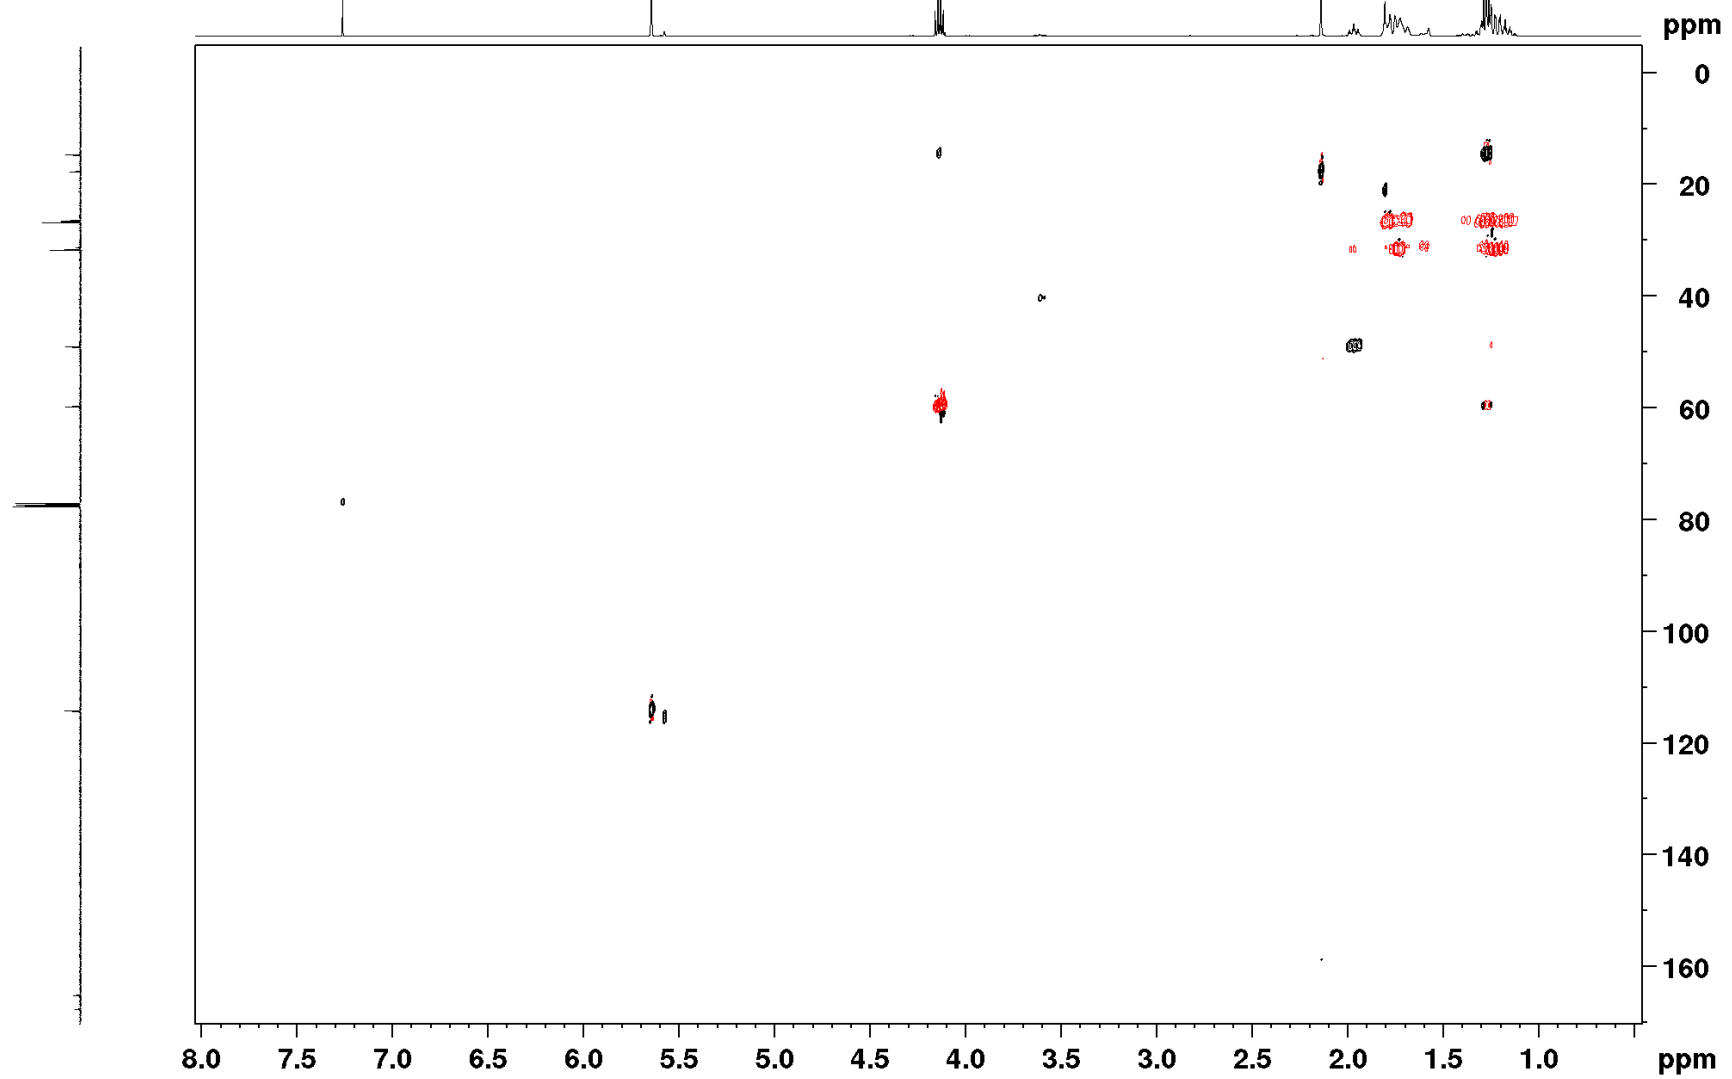

S495

$^1\text{H}$ - $^{13}\text{C}$  HMBC

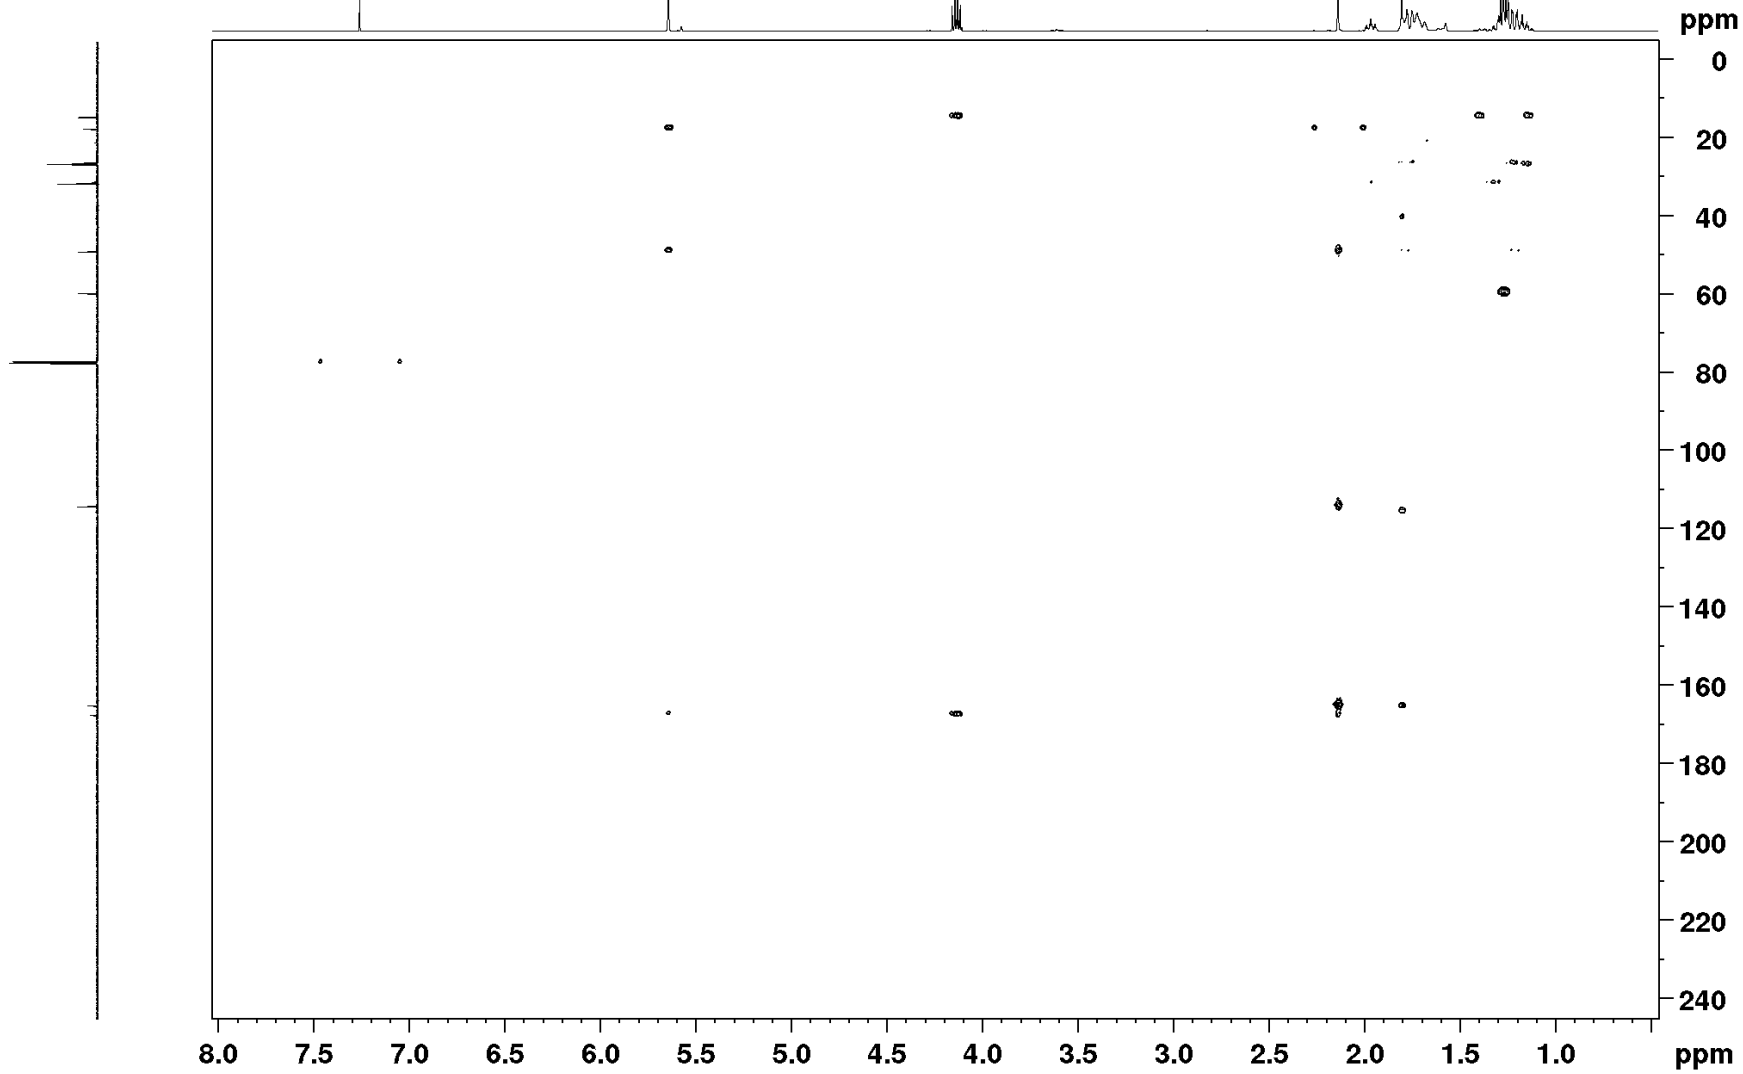

S496

$^1\text{H}$ - $^1\text{H}$  NOESY

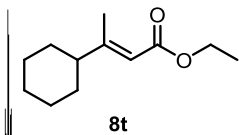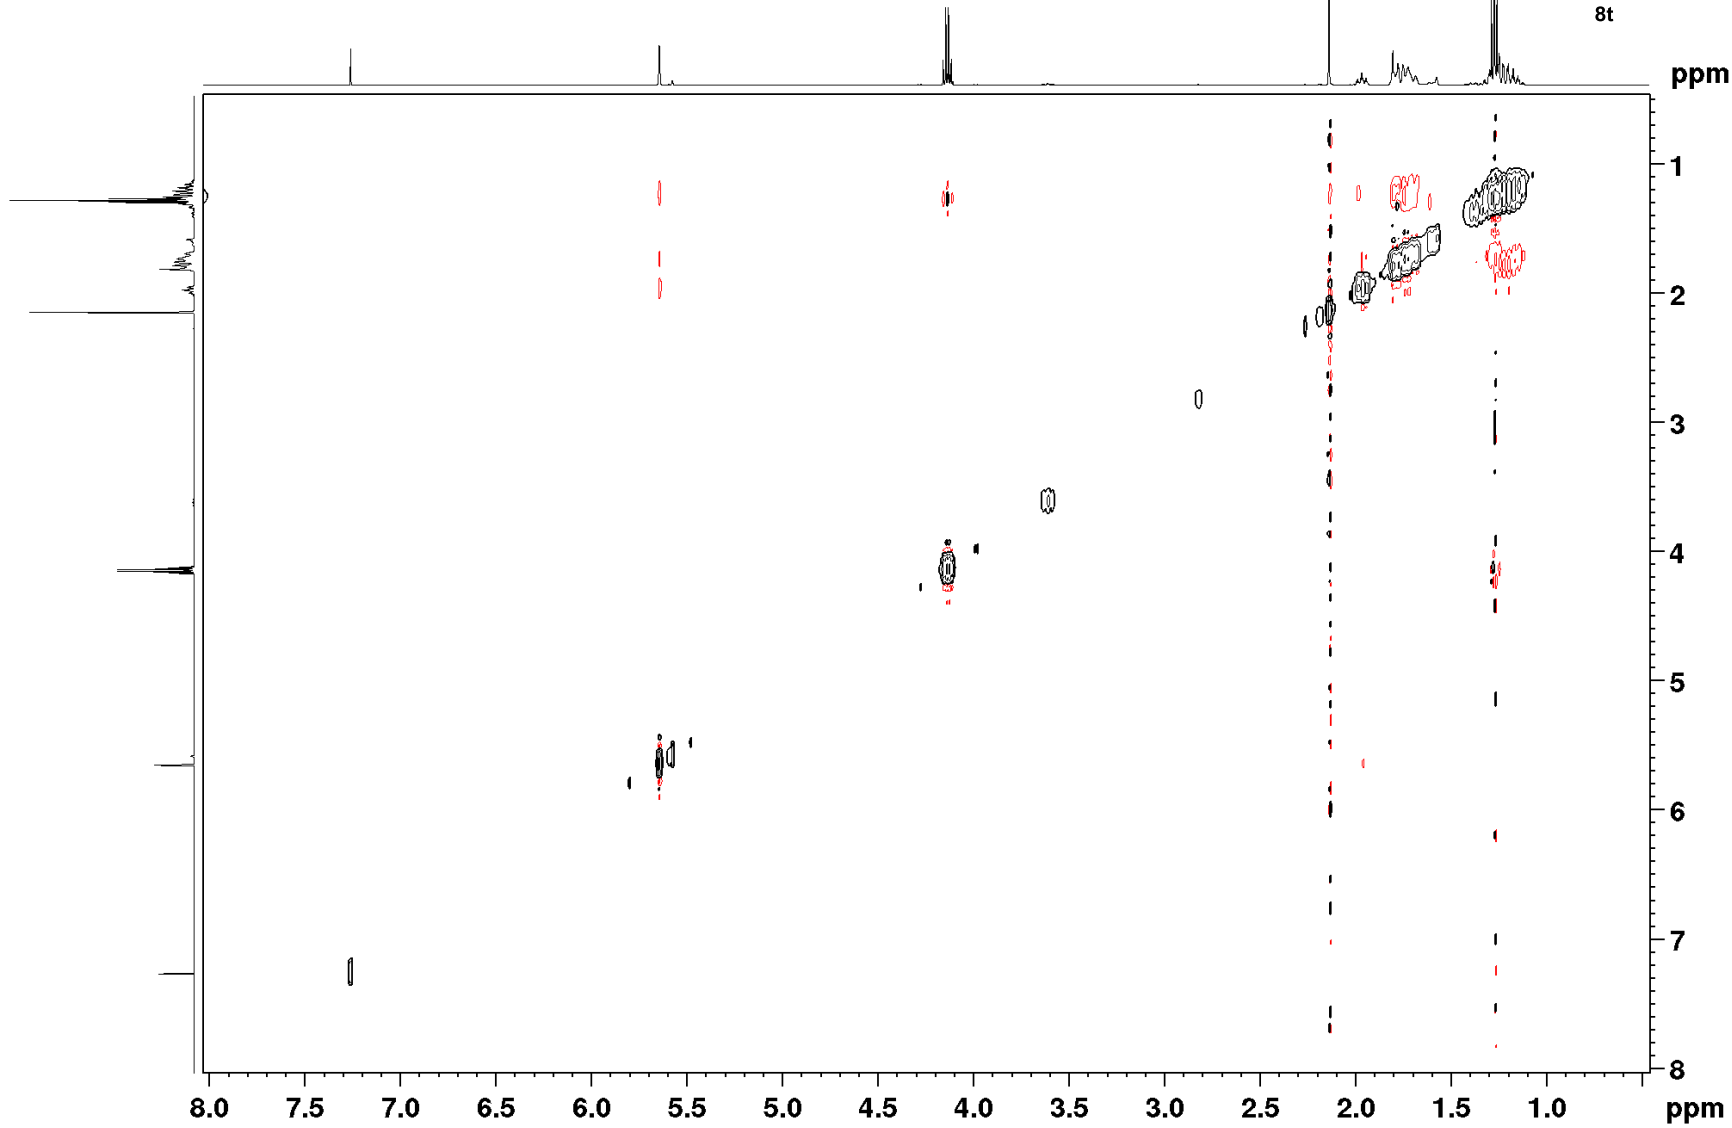

S497



Ethyl (*E*)-3-methylundec-2-enoate (**8u**)

$^1\text{H}$  NMR

5.66  
5.65  
5.65  
5.65

4.16  
4.15  
4.13  
4.12

2.15  
2.14  
2.14  
2.13  
2.12  
2.11  
2.10  
1.49  
1.48  
1.46  
1.45  
1.44  
1.43  
1.42  
1.30  
1.30  
1.29  
1.28  
1.27  
1.26  
1.25  
0.89  
0.88  
0.87

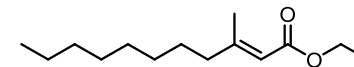

**8u**

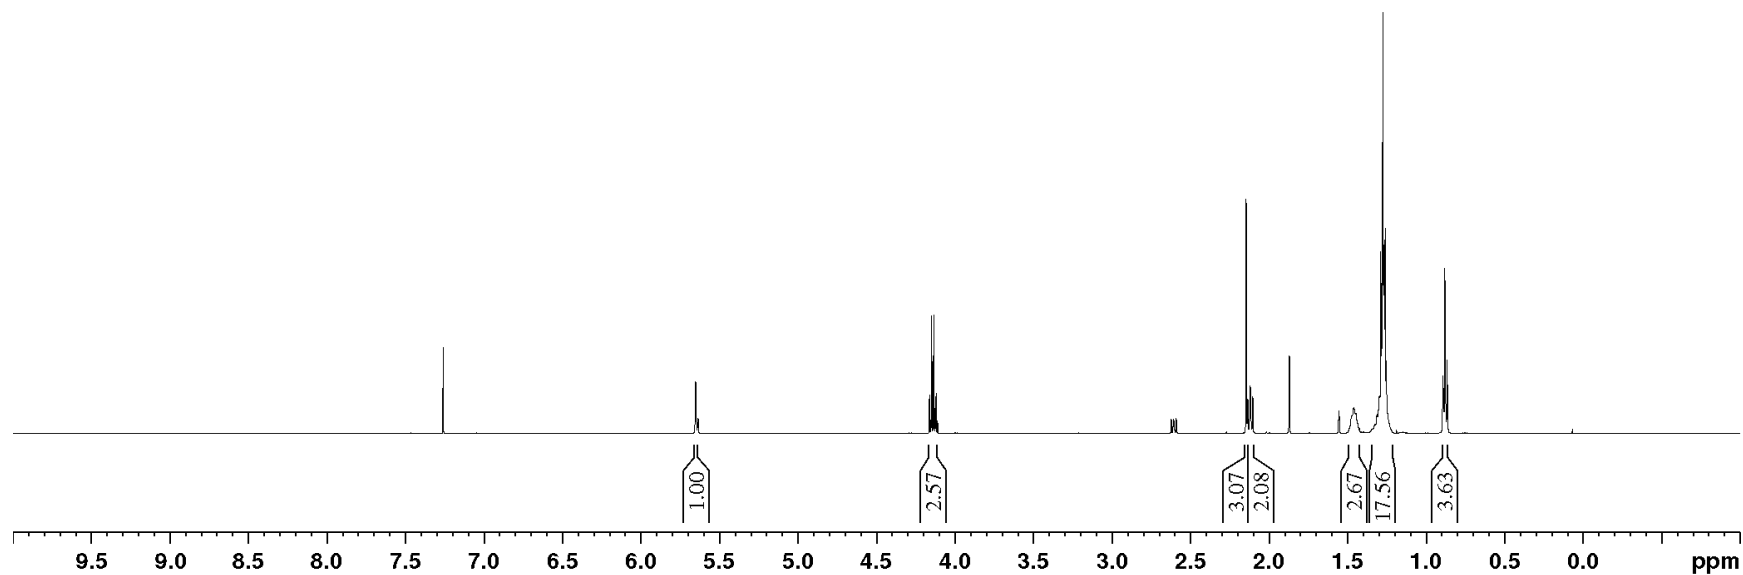

<sup>13</sup>C NMR

167.1  
160.9  
160.5

116.1  
115.5

59.5  
59.5

41.1  
33.5  
32.0  
29.9  
29.6  
29.5  
29.4  
29.3  
28.4  
27.5  
25.3  
22.8  
18.8  
14.5  
14.2

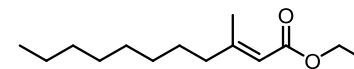

8u

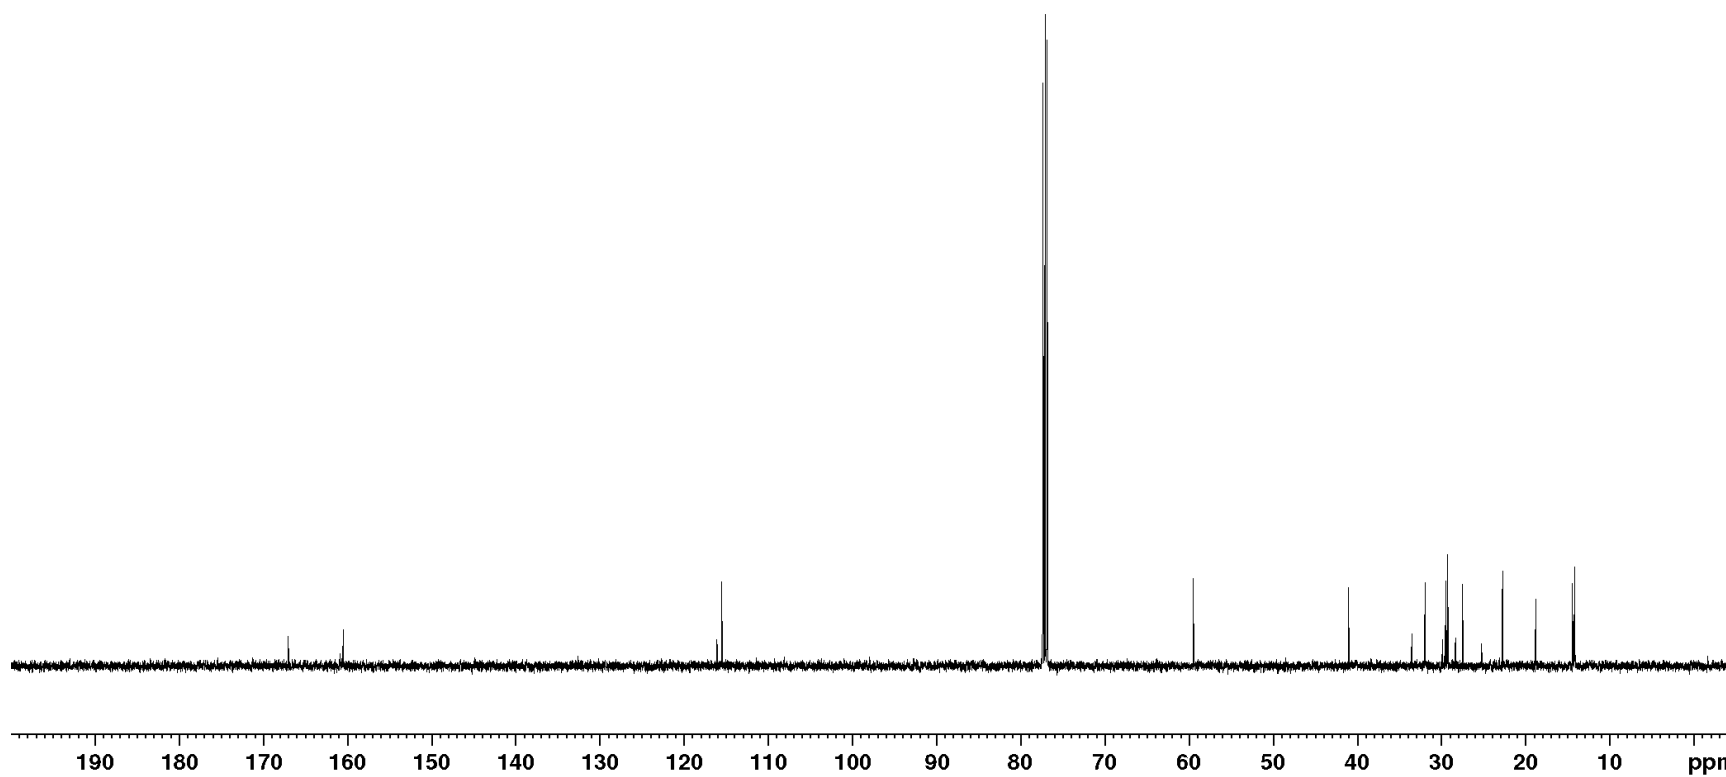



$^1\text{H}$ - $^1\text{H}$  COSY



8u

ppm



S501

$^1\text{H}$ - $^{13}\text{C}$  HSQC

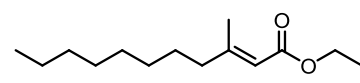

8u

ppm

0

20

40

60

80

100

120

140

160

7.5 7.0 6.5 6.0 5.5 5.0 4.5 4.0 3.5 3.0 2.5 2.0 1.5 1.0 0.5 ppm

S502

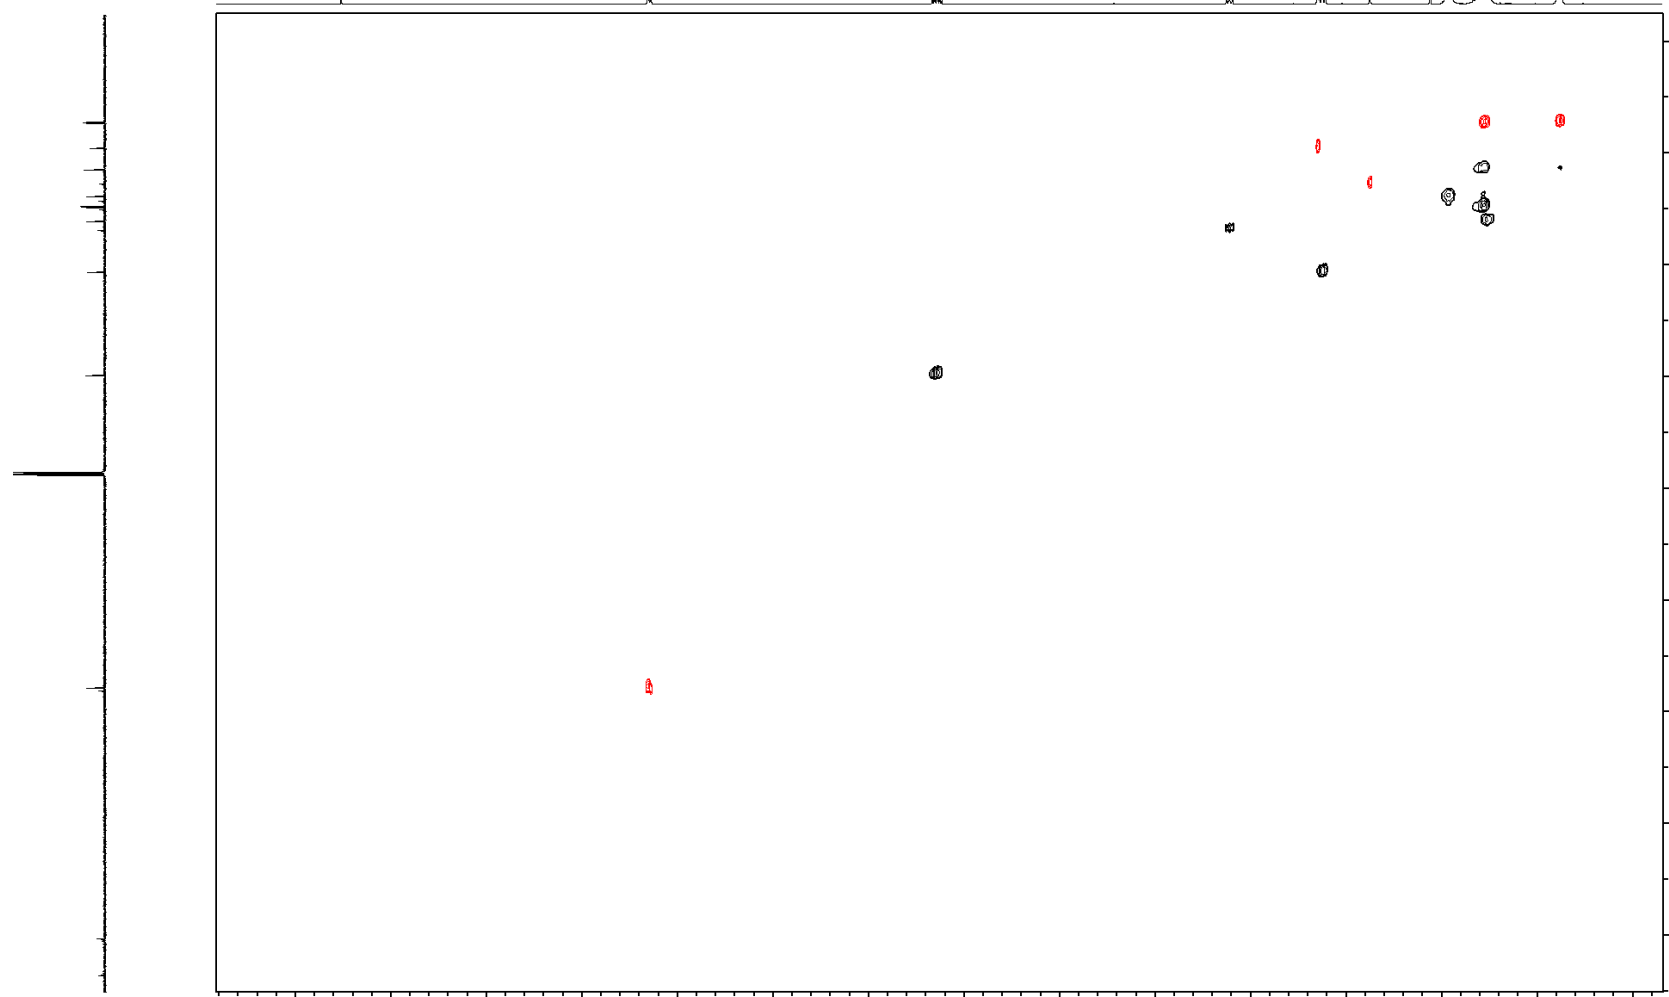

$^1\text{H}$ - $^{13}\text{C}$  HMBC

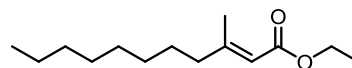

8u

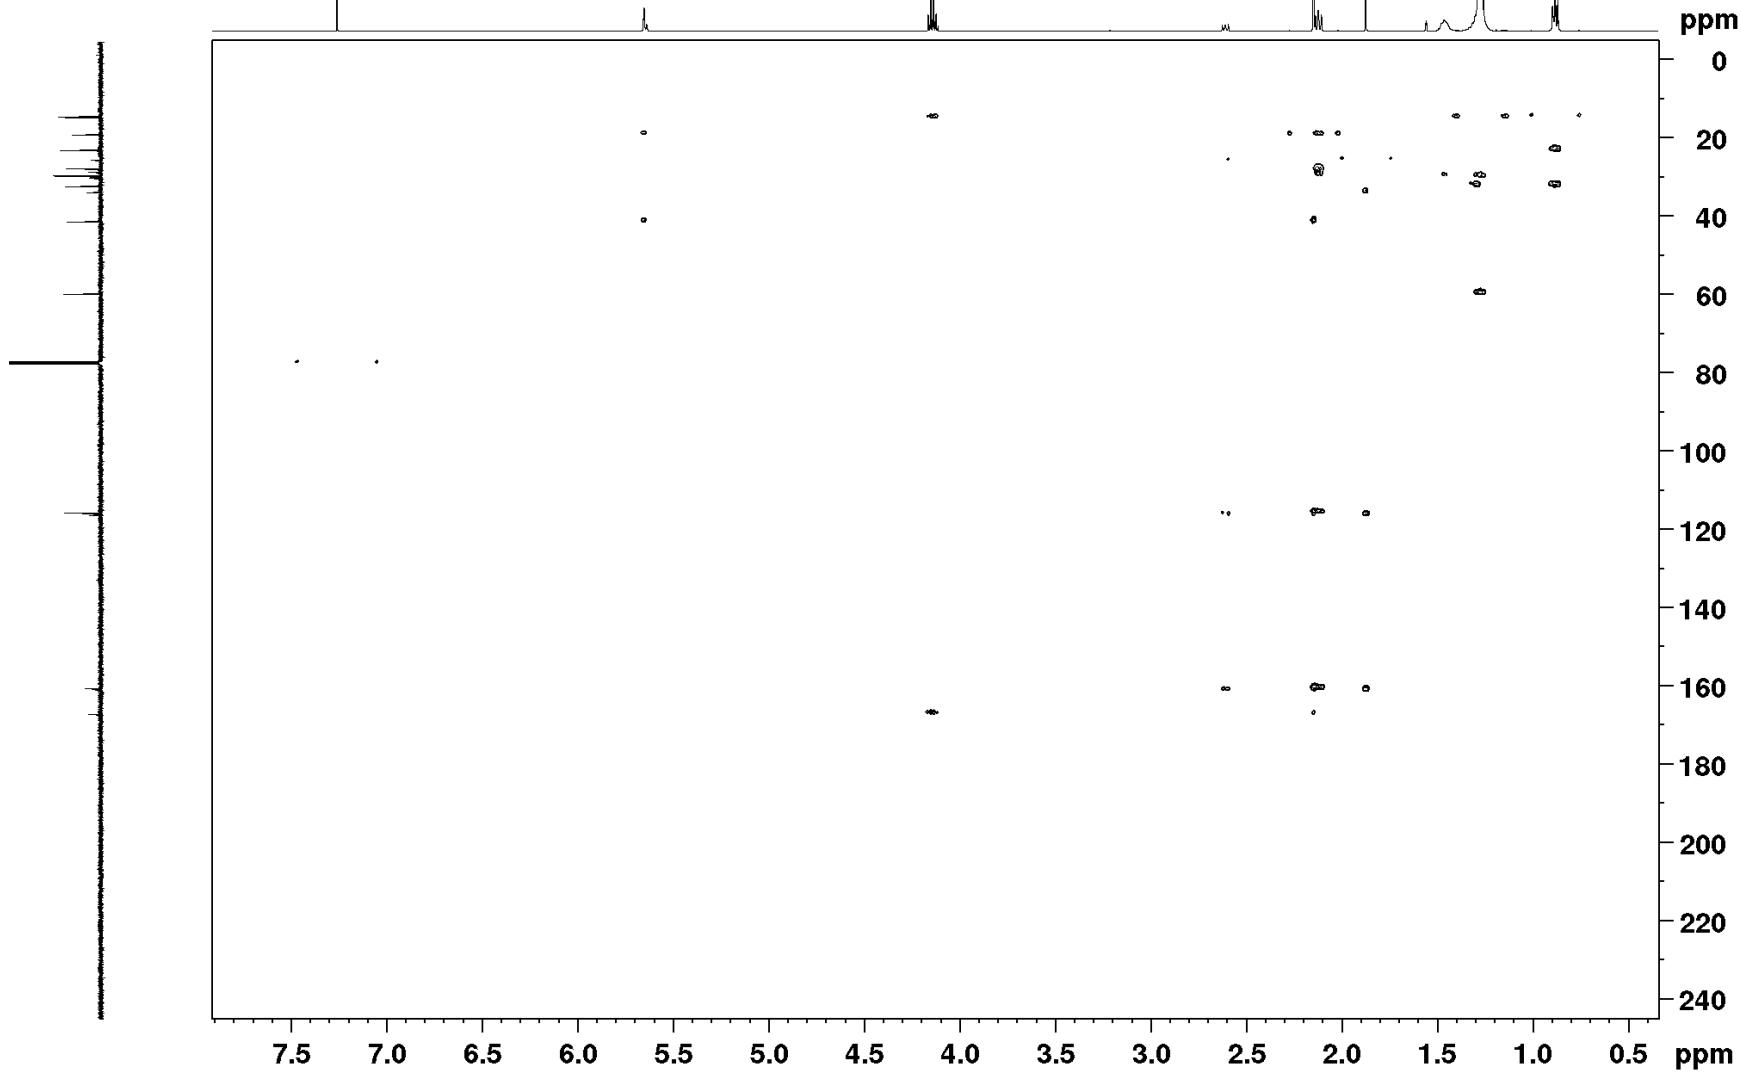

S503

$^1\text{H}$ - $^1\text{H}$  NOESY



8u



S504



S505

Ethyl (E)-3-(4-(phenylethynyl)phenyl)but-2-enoate (S3)

<sup>1</sup>H NMR

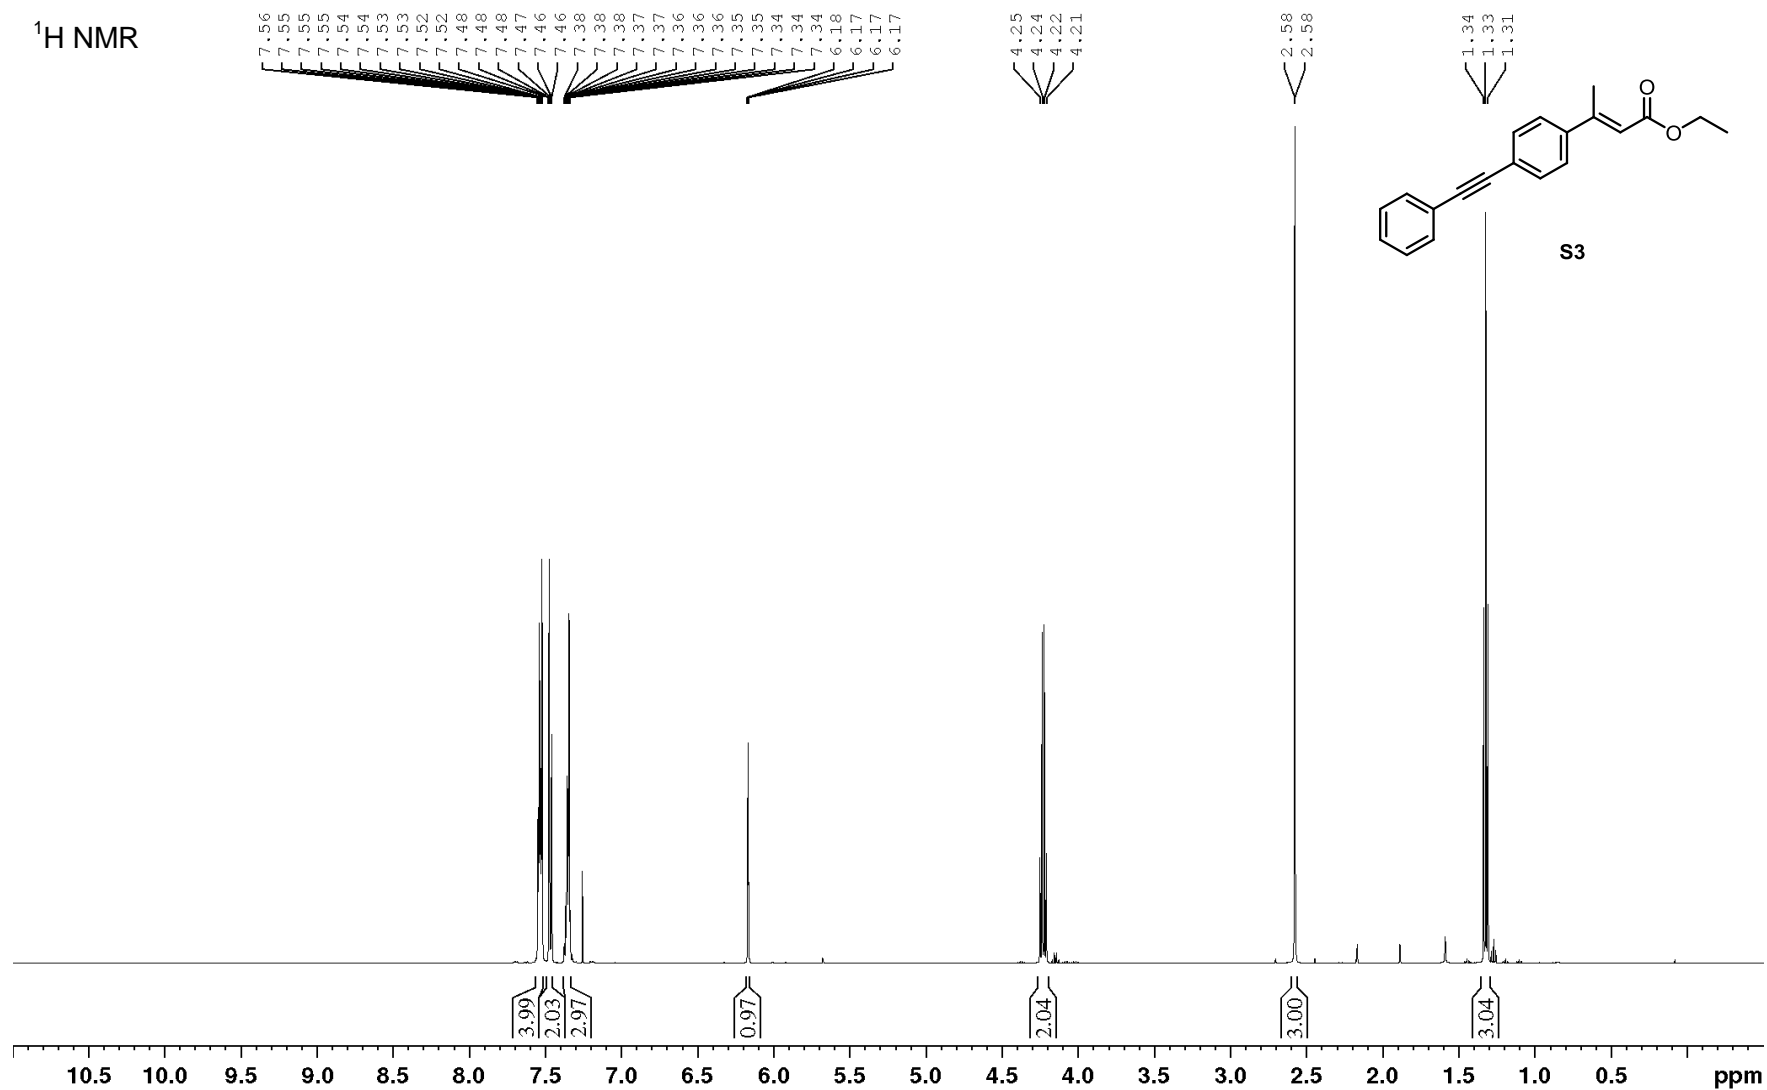

<sup>13</sup>C NMR

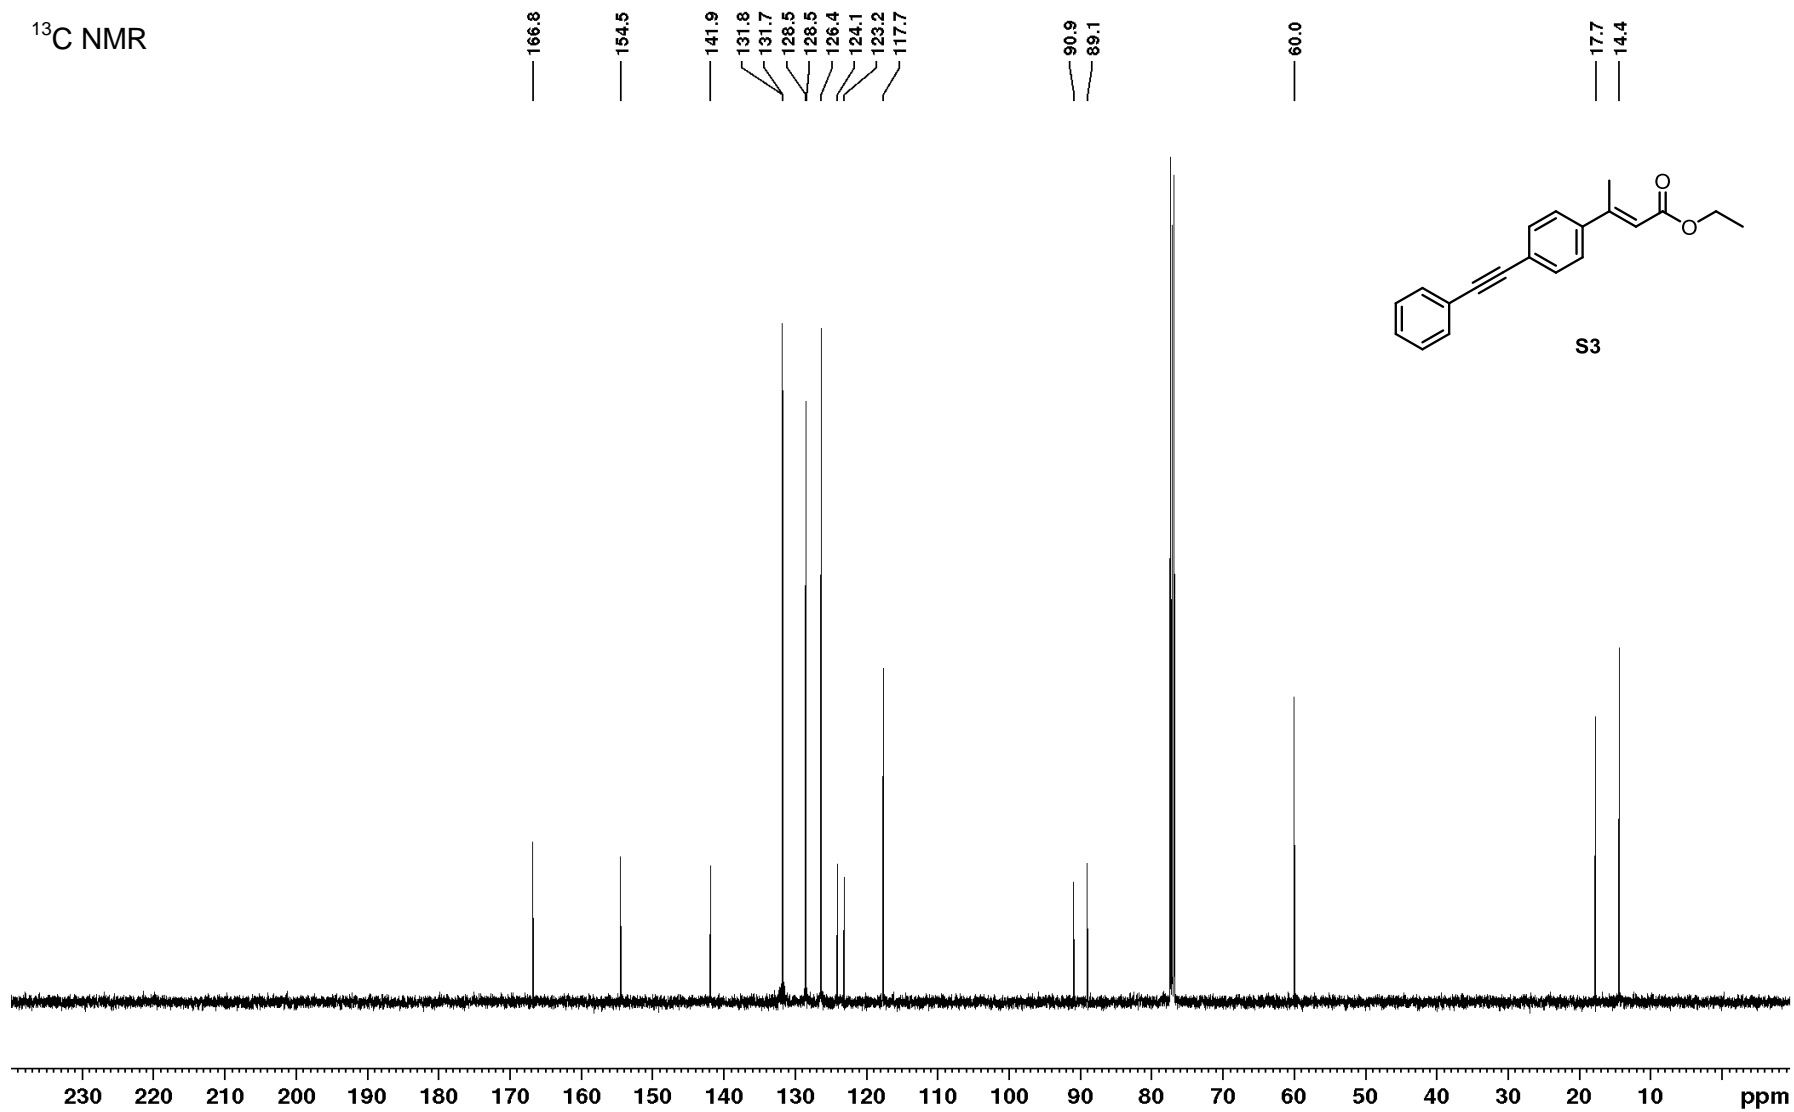

<sup>13</sup>C DEPT NMR

131.8  
131.7  
128.6  
128.5  
126.4  
117.7

60.0

17.7  
14.4

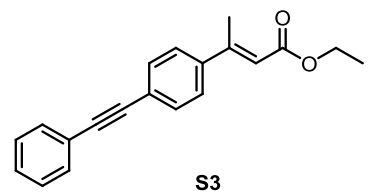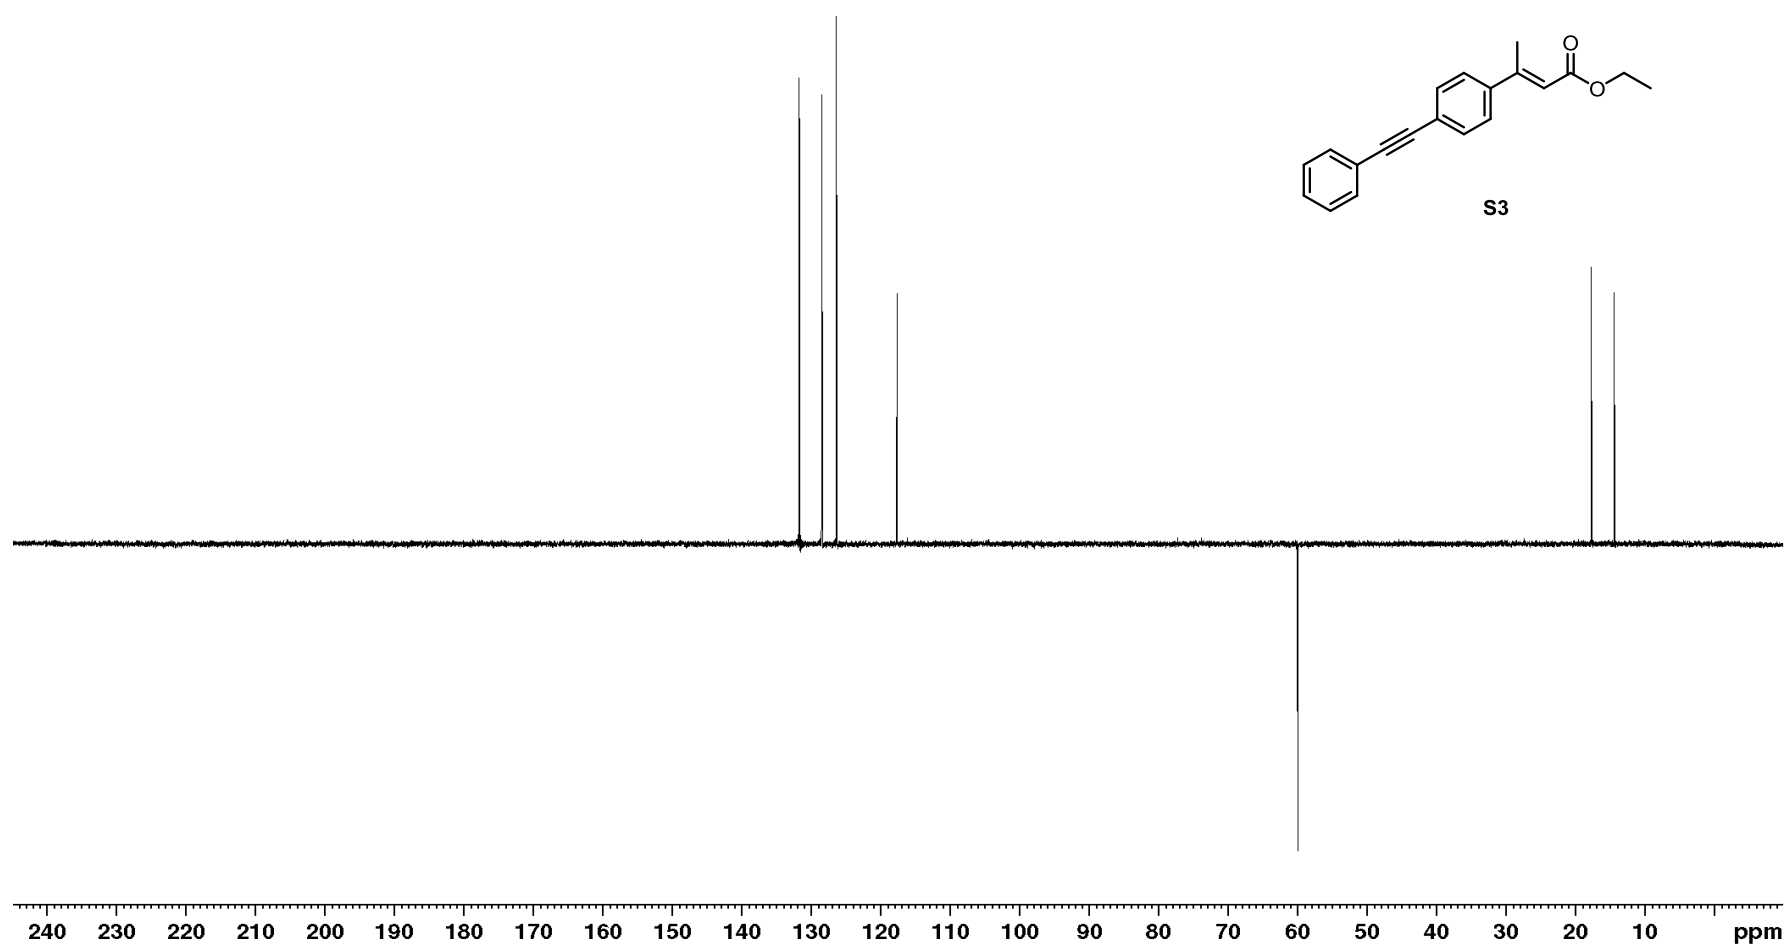



$^1\text{H}$ - $^1\text{H}$  COSY

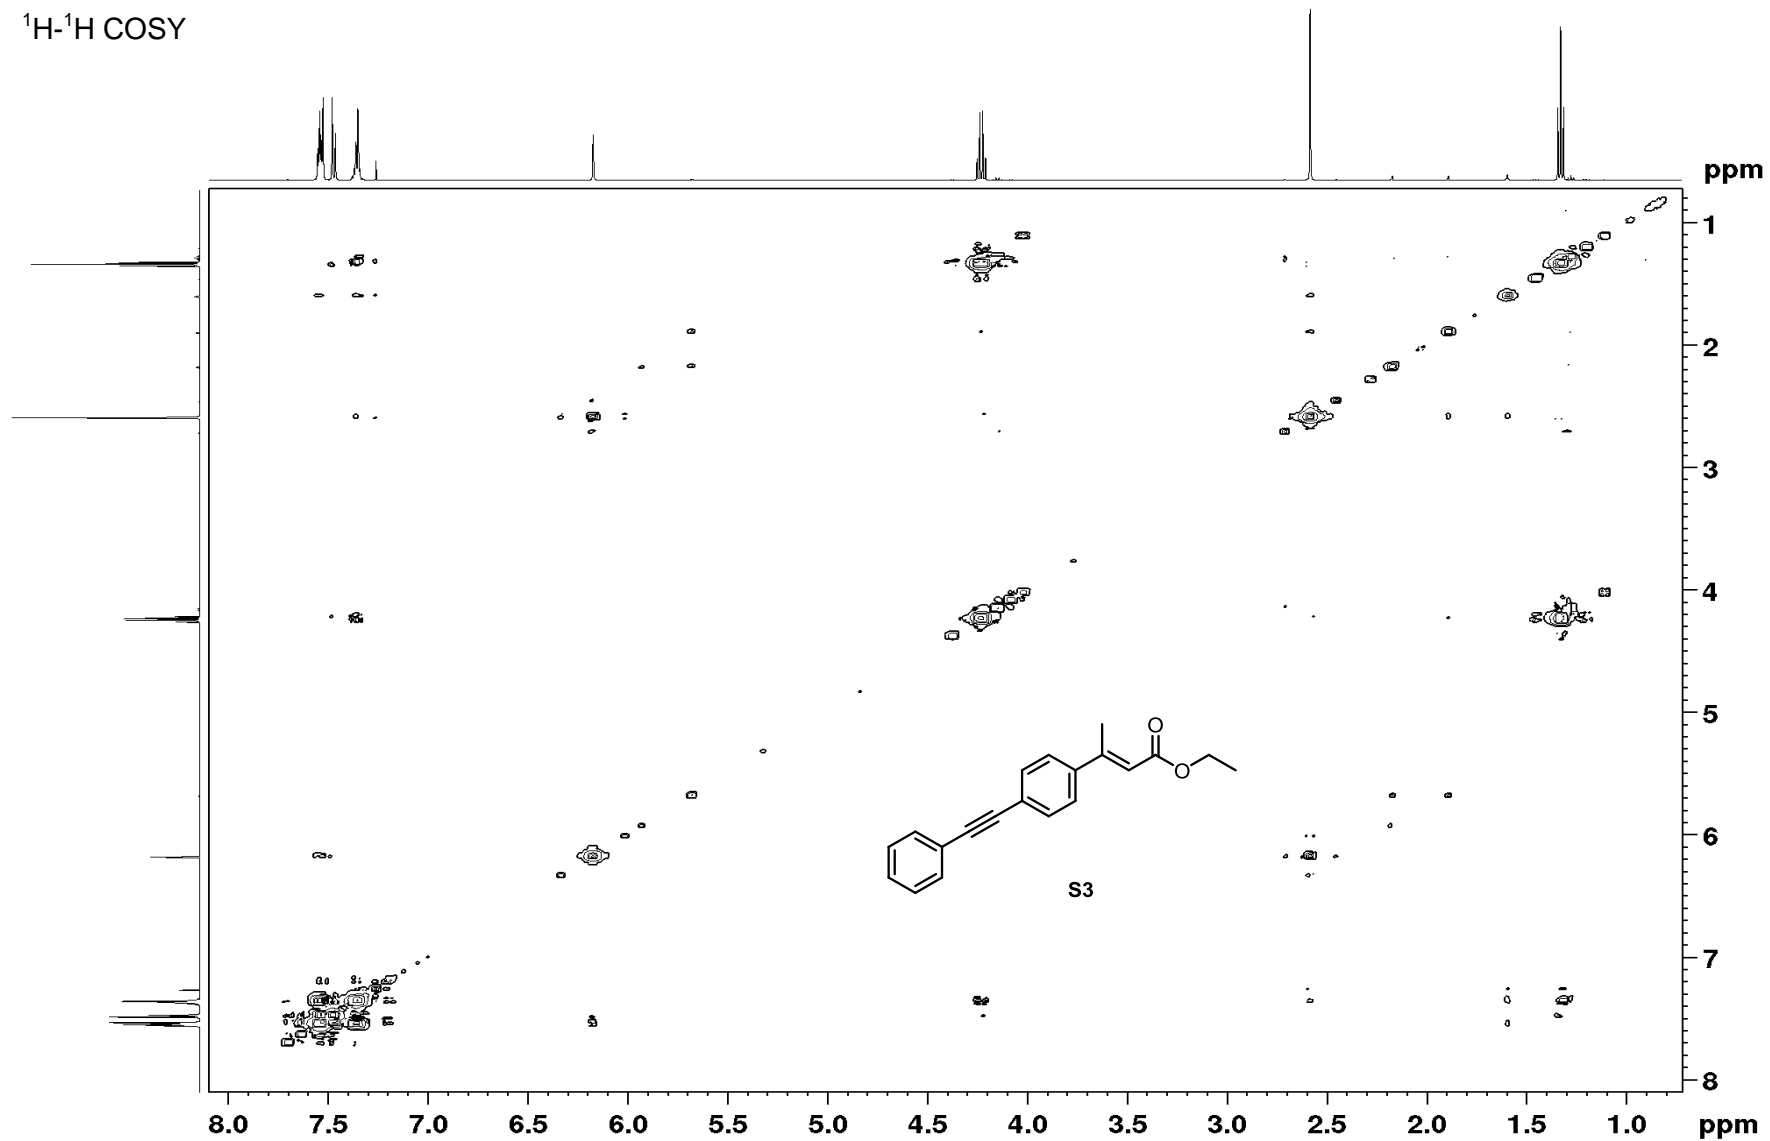

S509

$^1\text{H}$ - $^{13}\text{C}$  HMQC

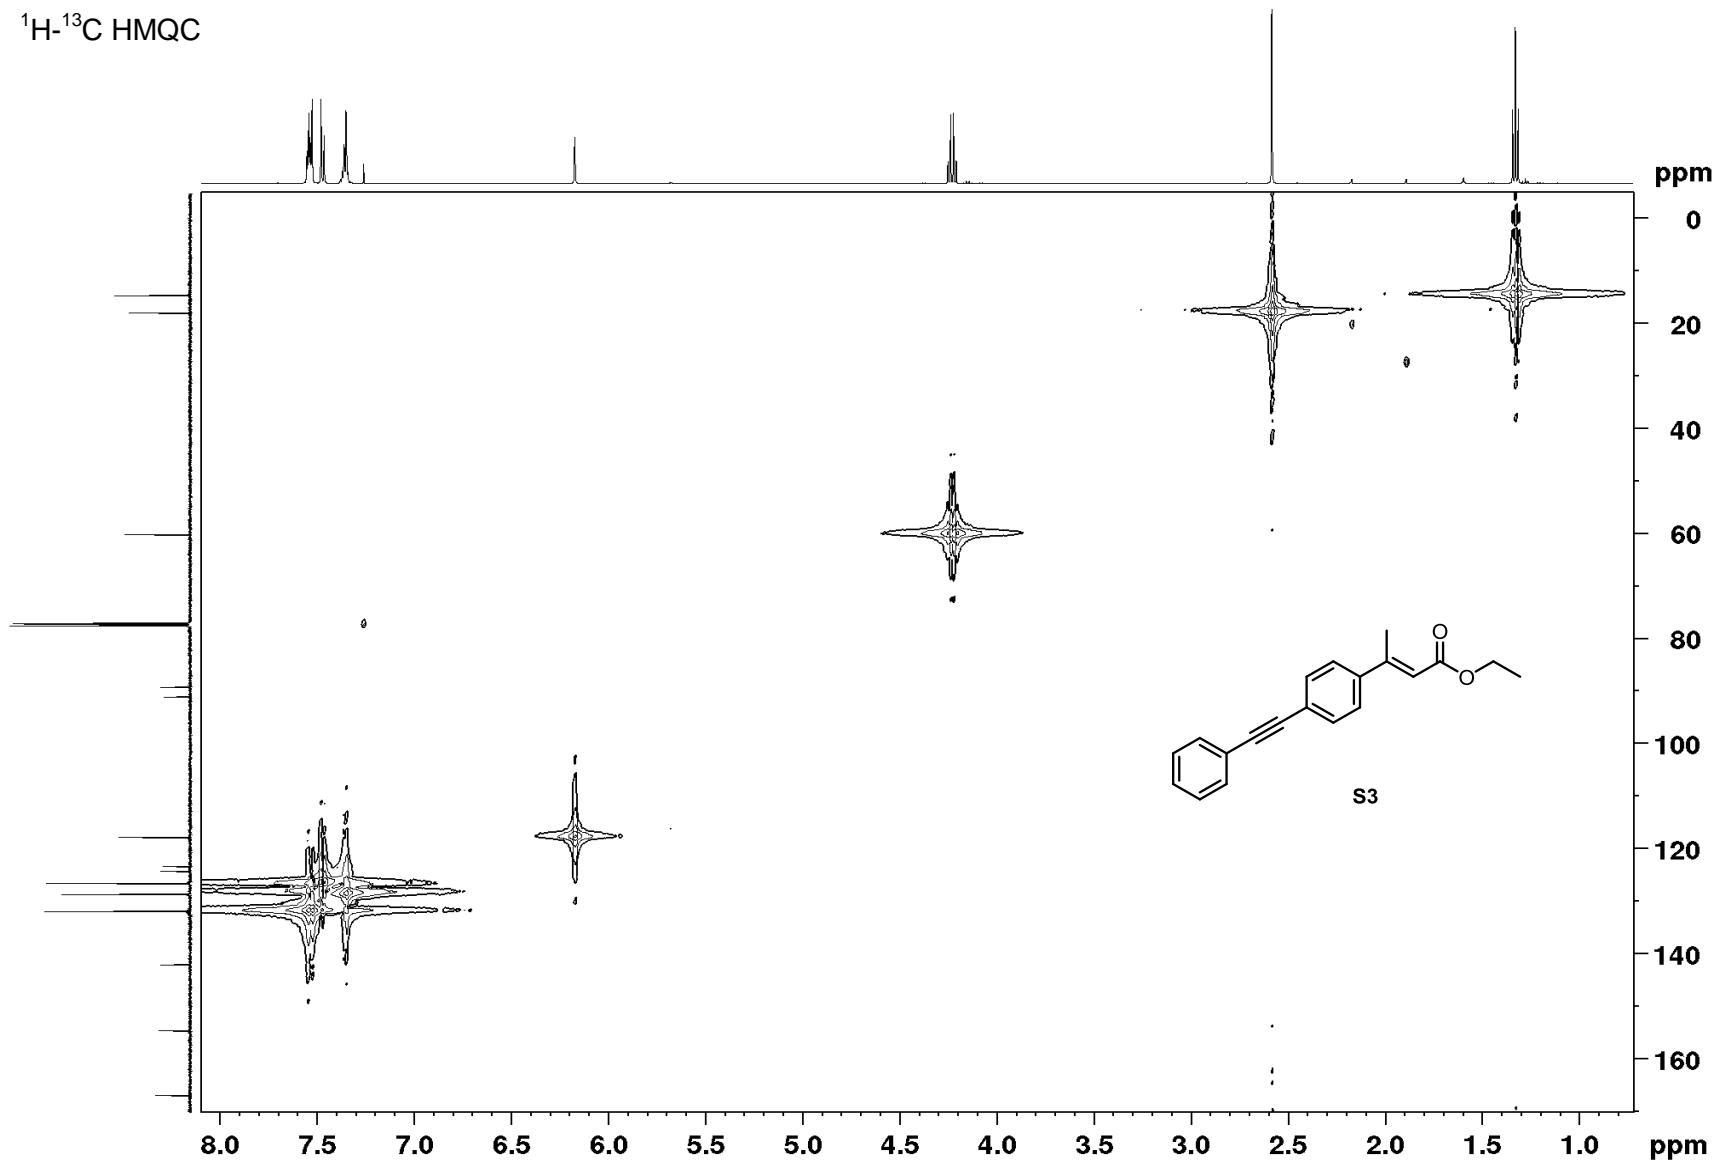

$^1\text{H}$ - $^{13}\text{C}$  HMBC

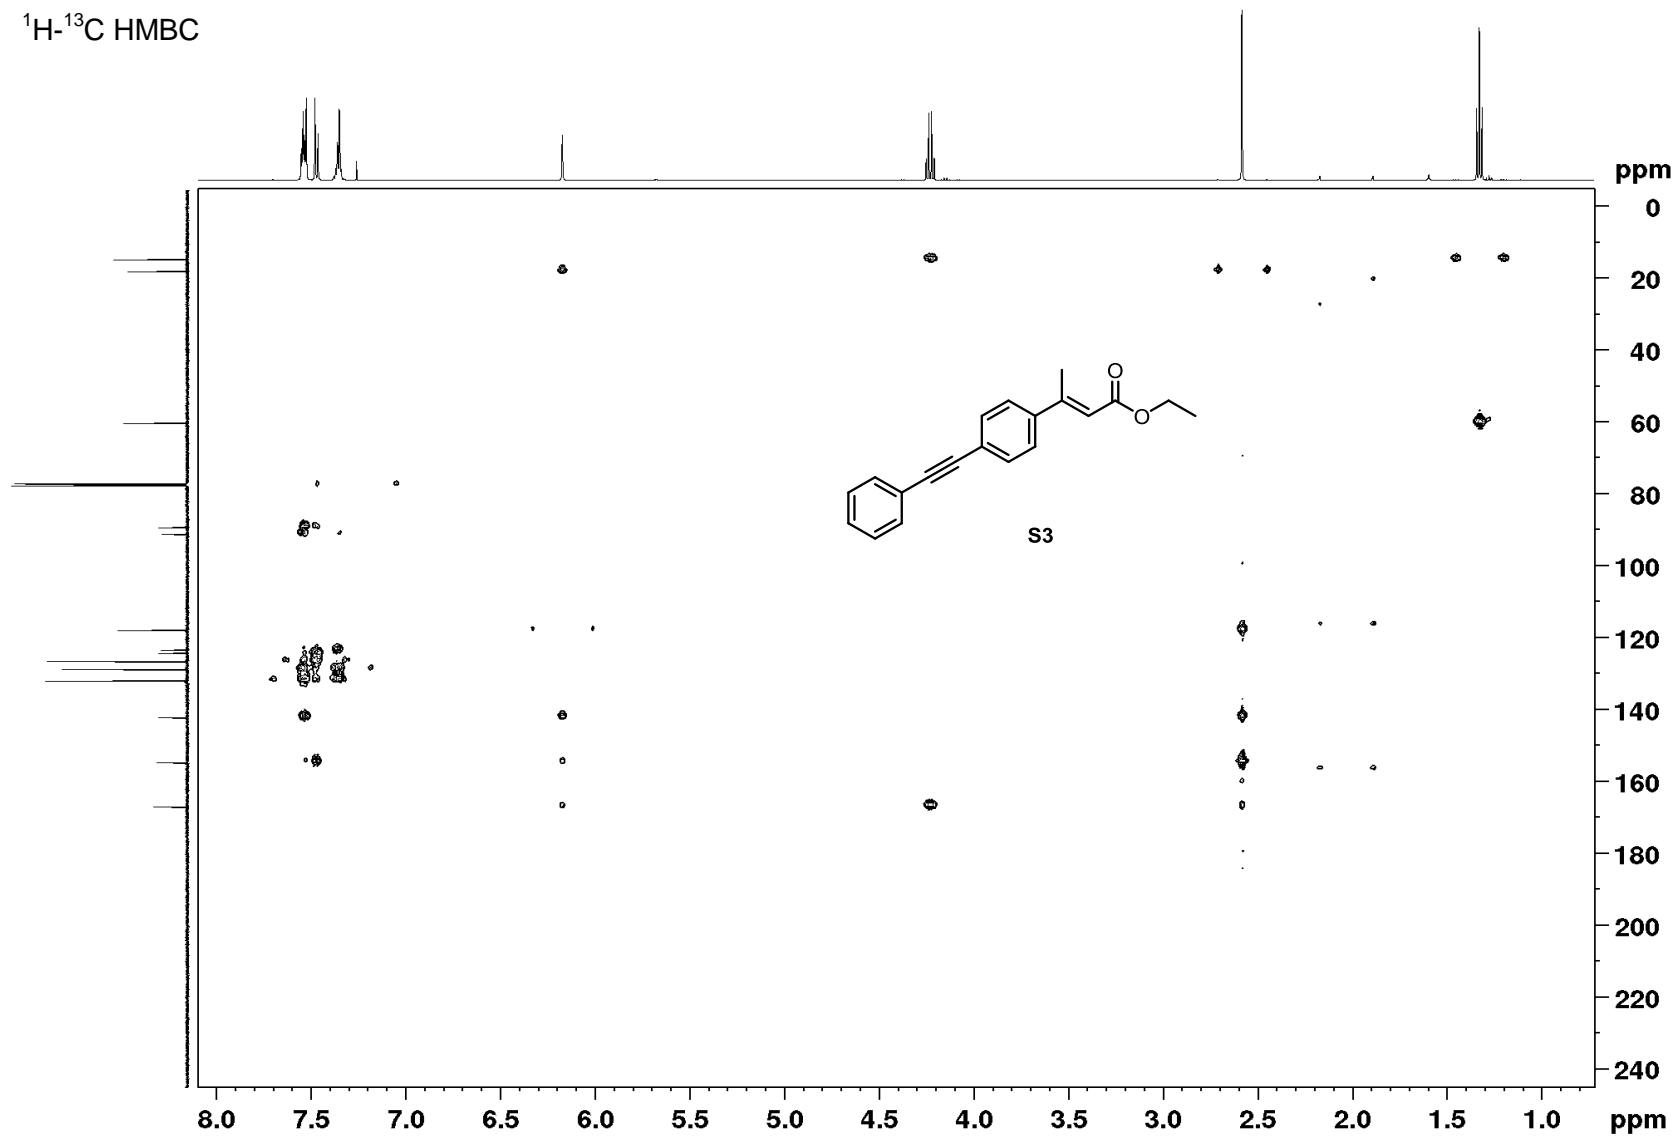

$^1\text{H}$ - $^1\text{H}$  NOESY

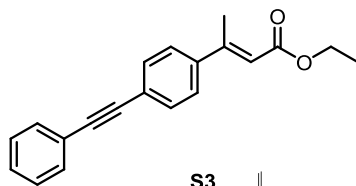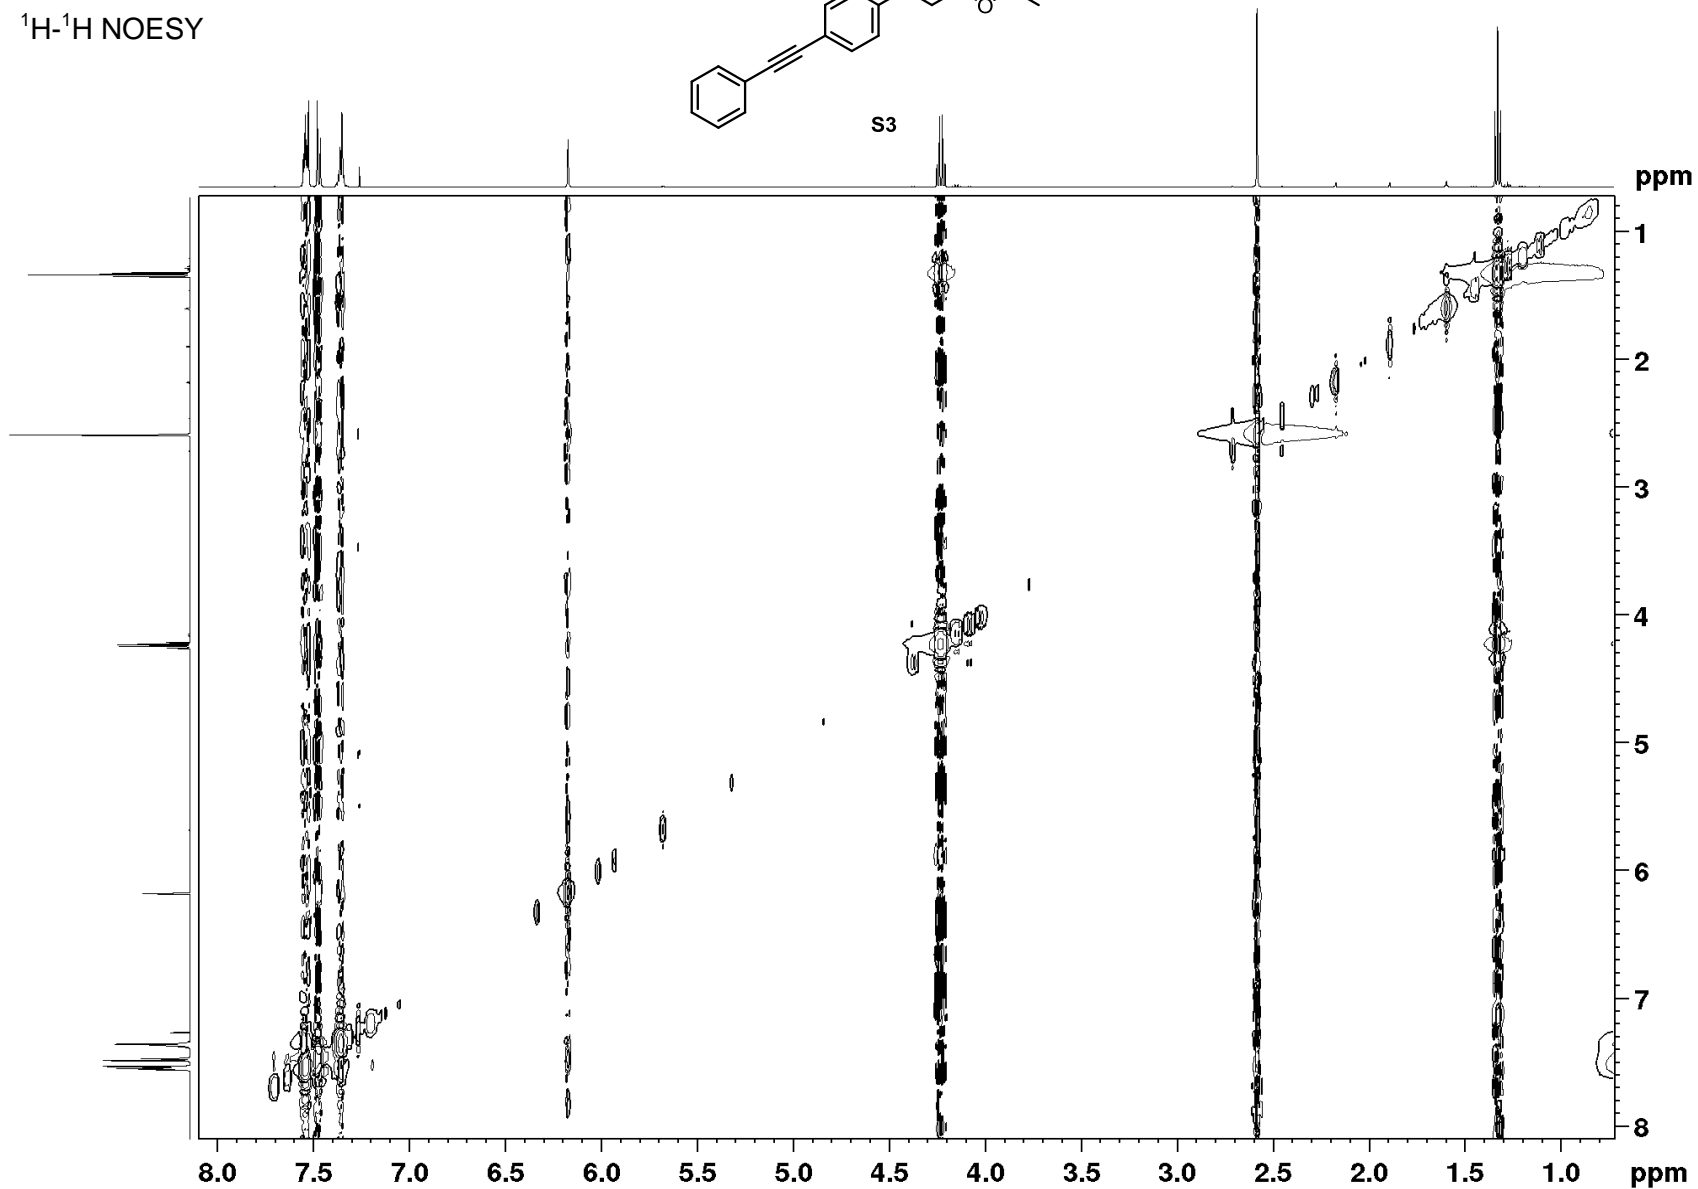

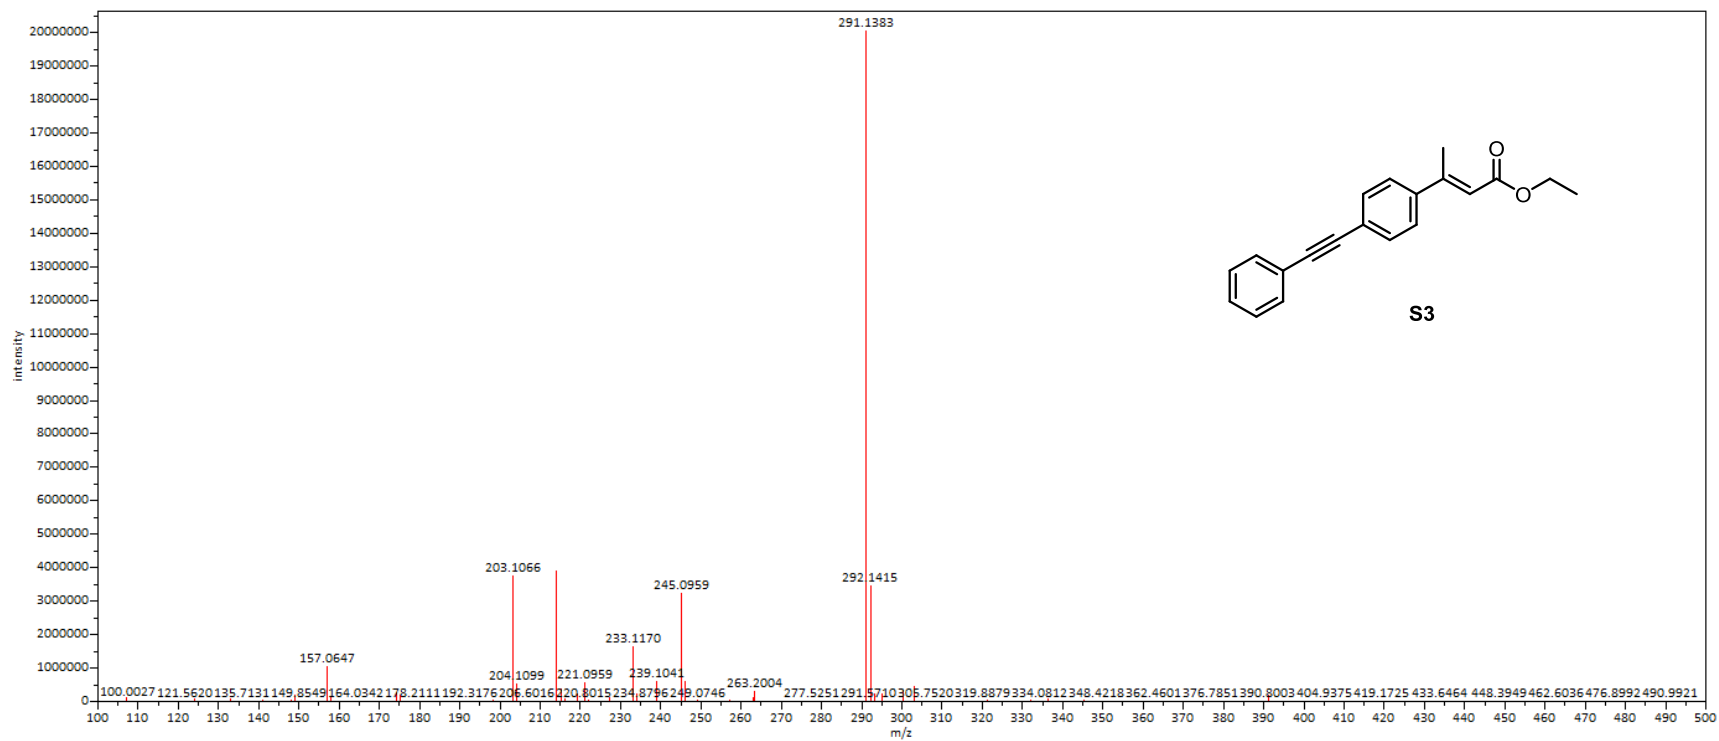

S513

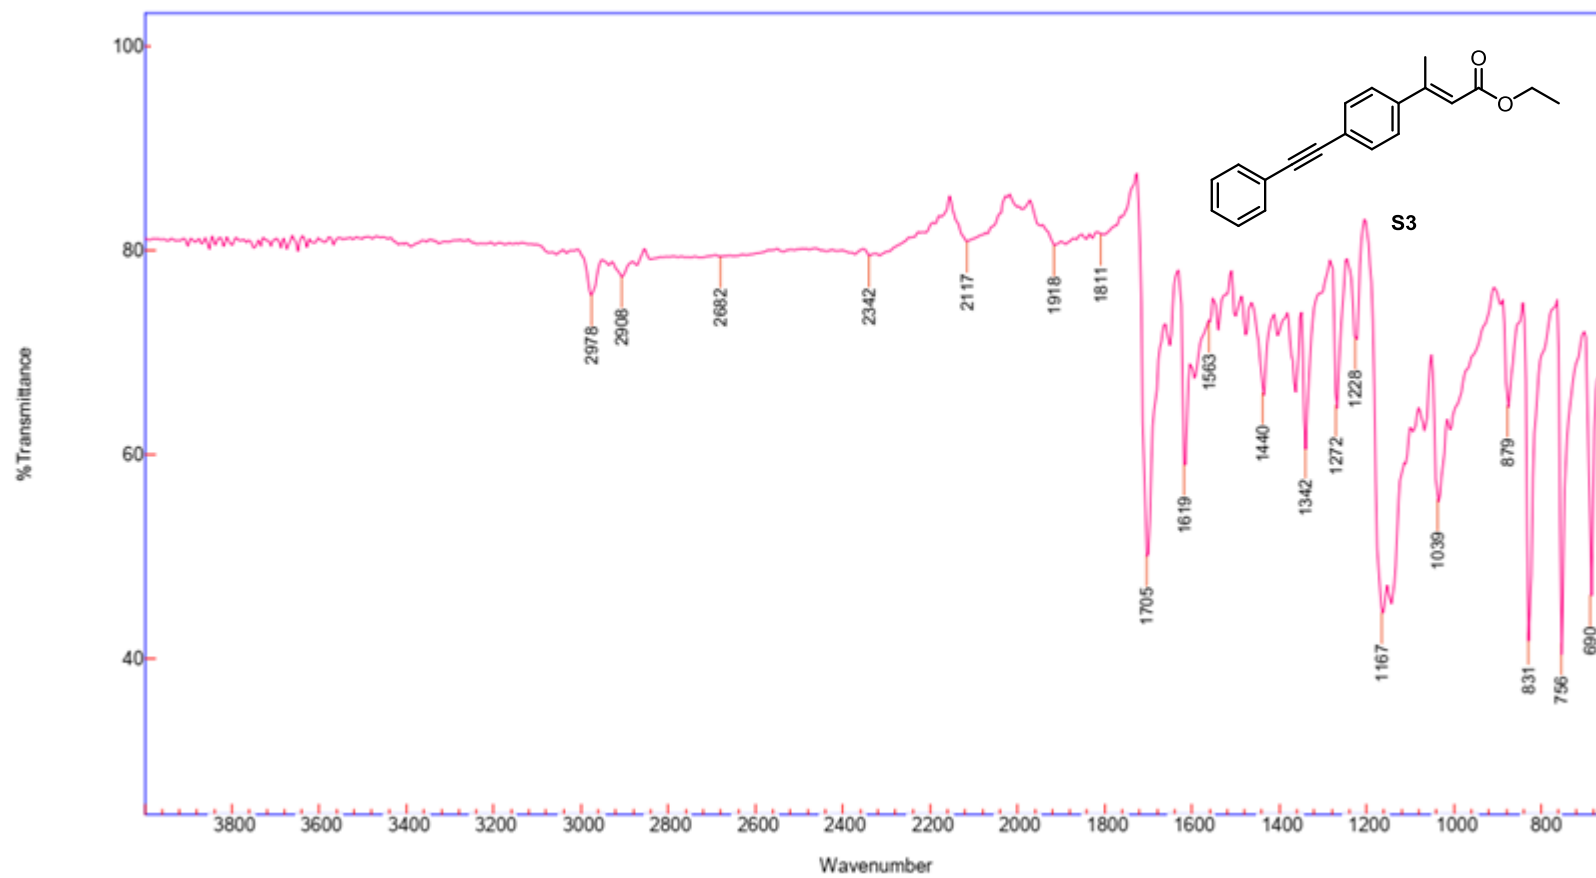

**tert-Butyl 2-(diethoxyphosphoryl)acetate (S4)**

<sup>1</sup>H NMR

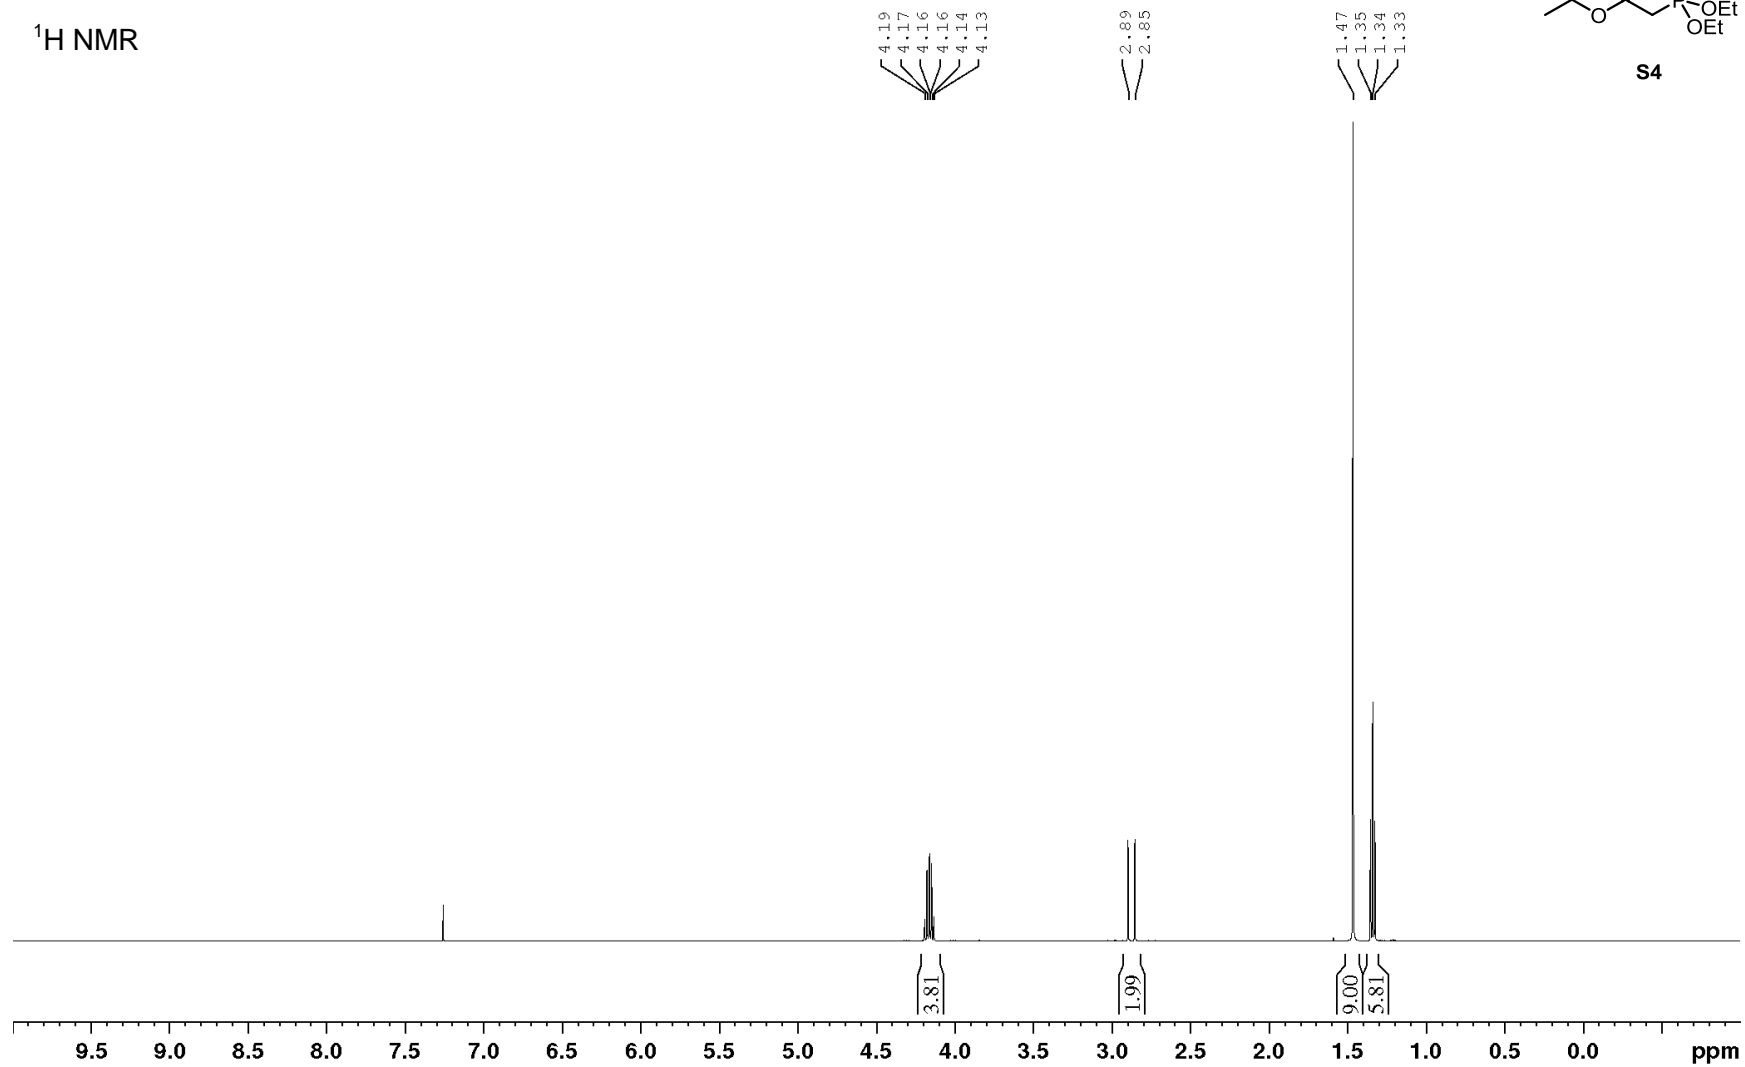

<sup>13</sup>C NMR

165.1  
165.0

82.1

62.6  
62.6

36.3  
35.2

28.1

16.5  
16.5

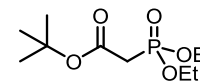

S4

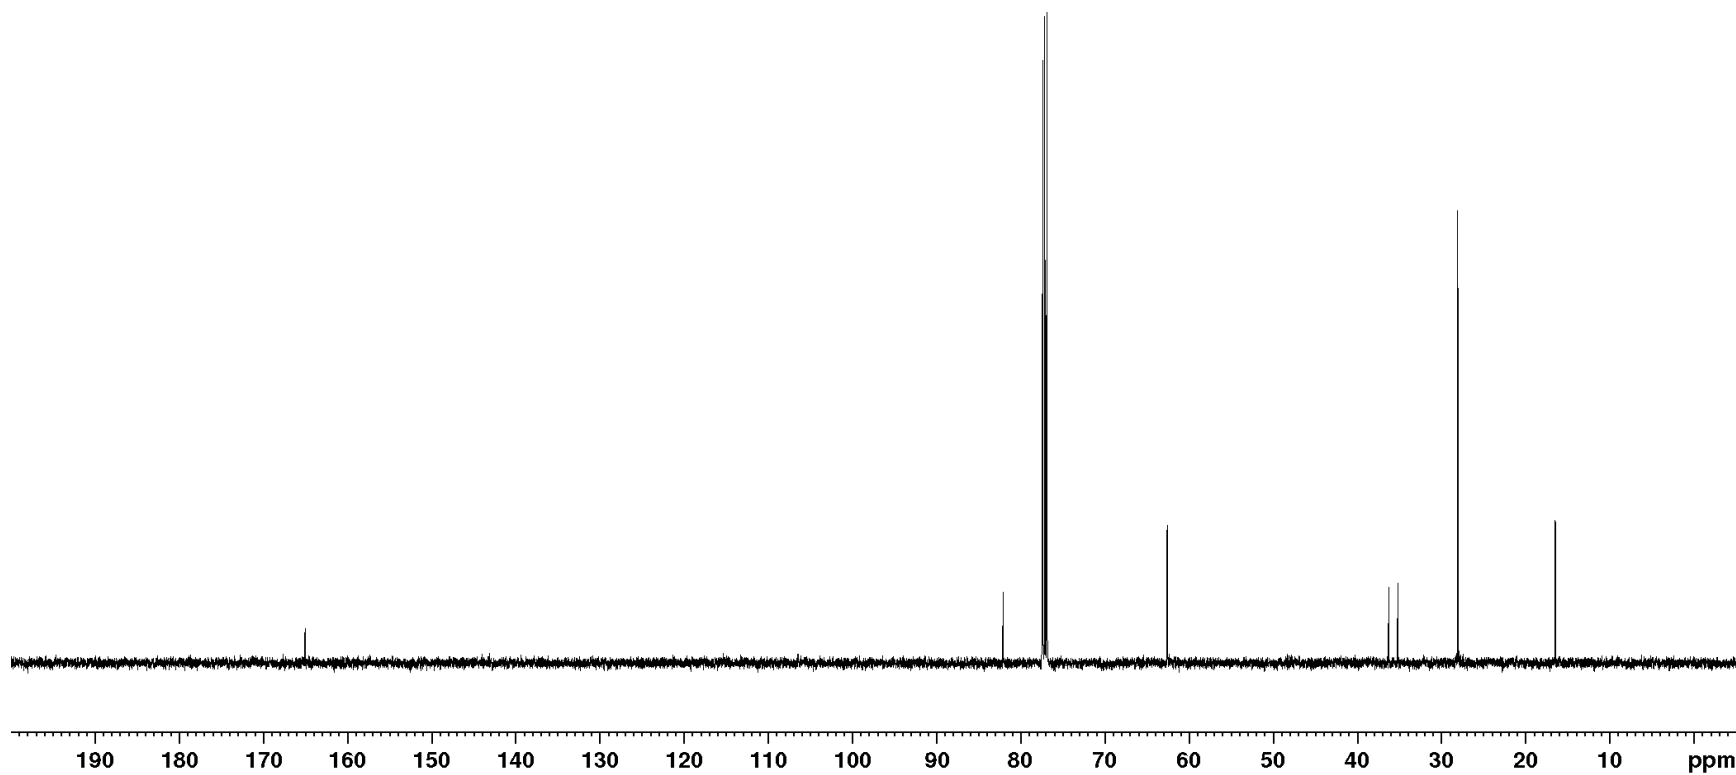



<sup>13</sup>C DEPT NMR

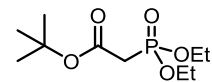

S4

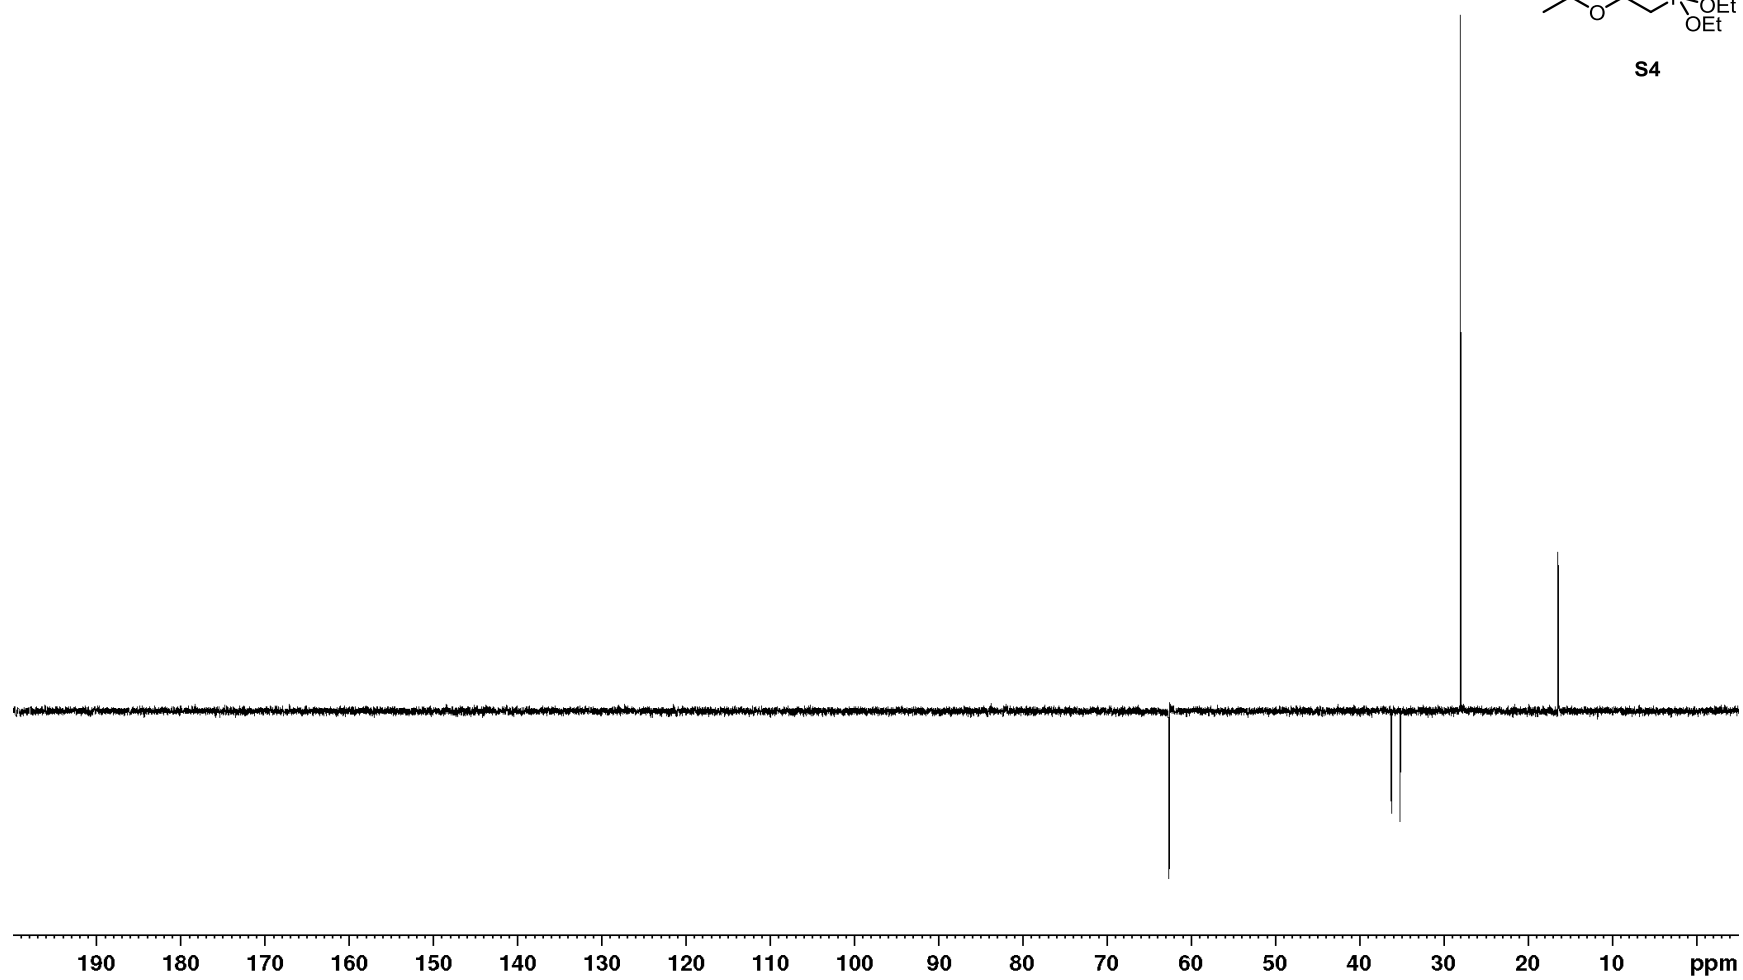

$^1\text{H}$ - $^1\text{H}$  COSY

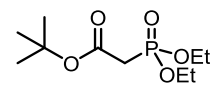

S4

ppm

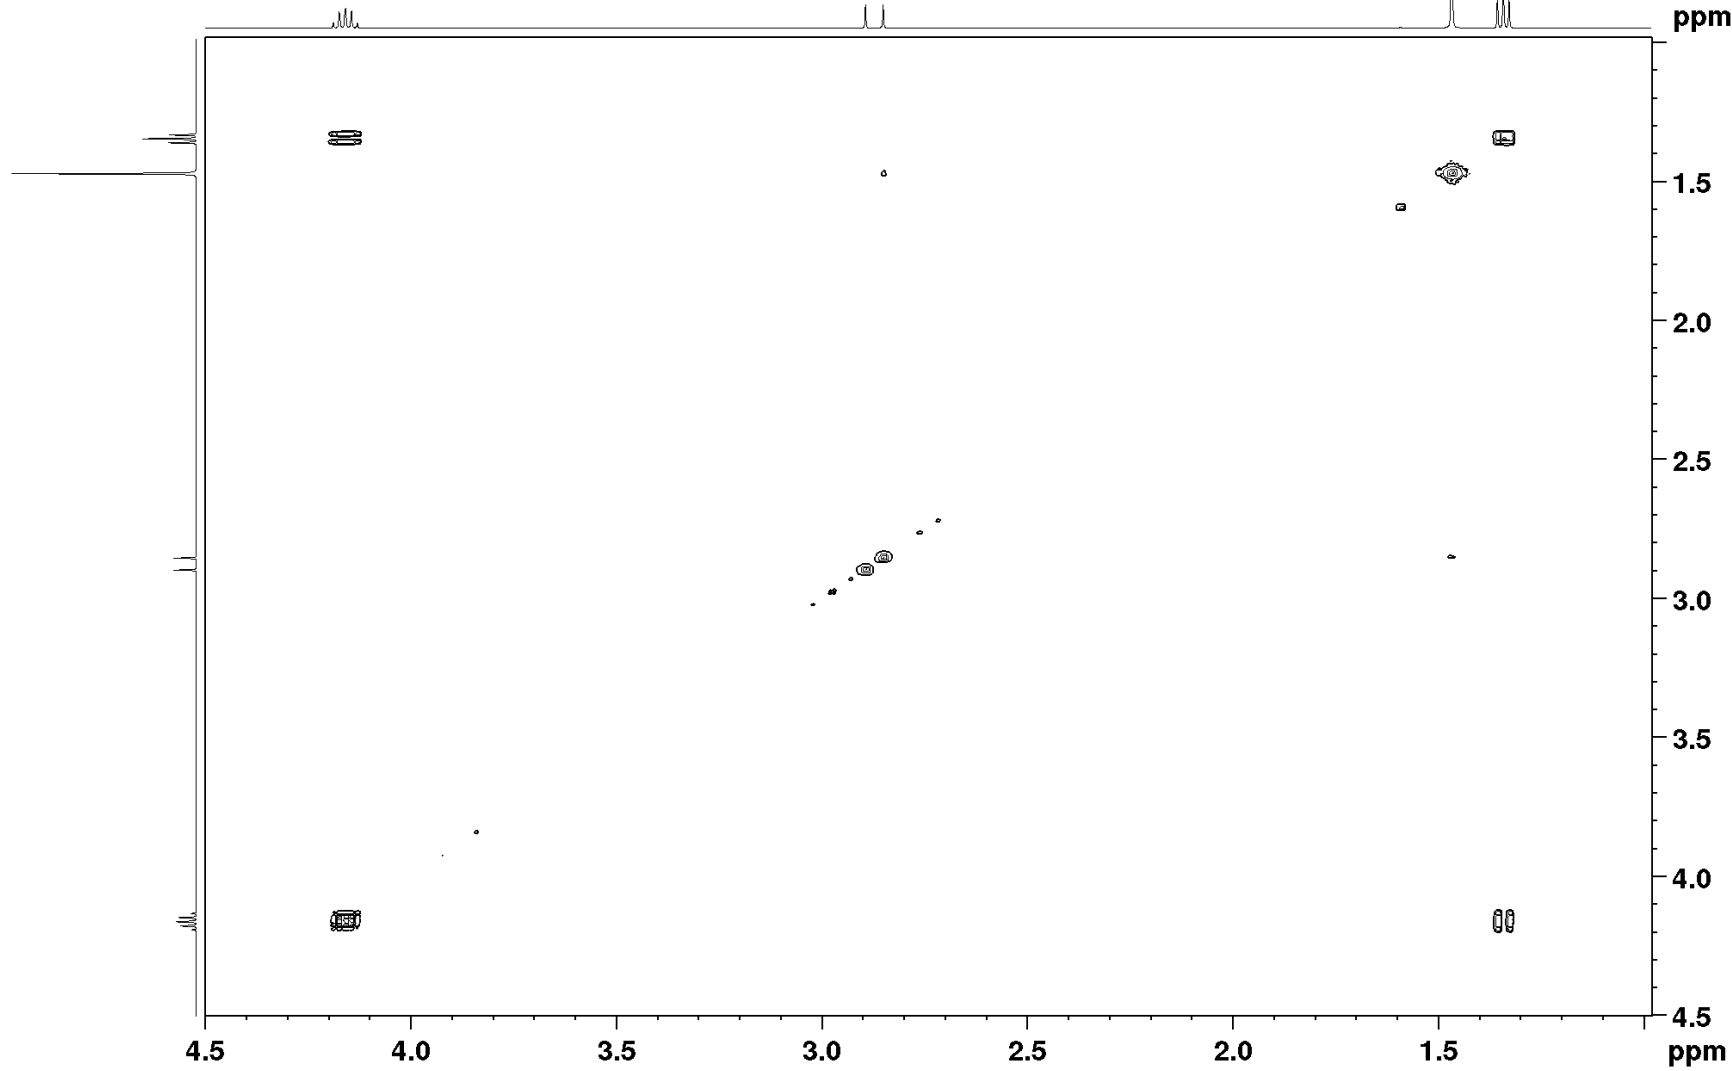

S518

$^1\text{H}$ - $^{13}\text{C}$  HMQC

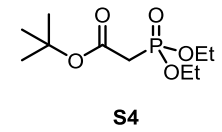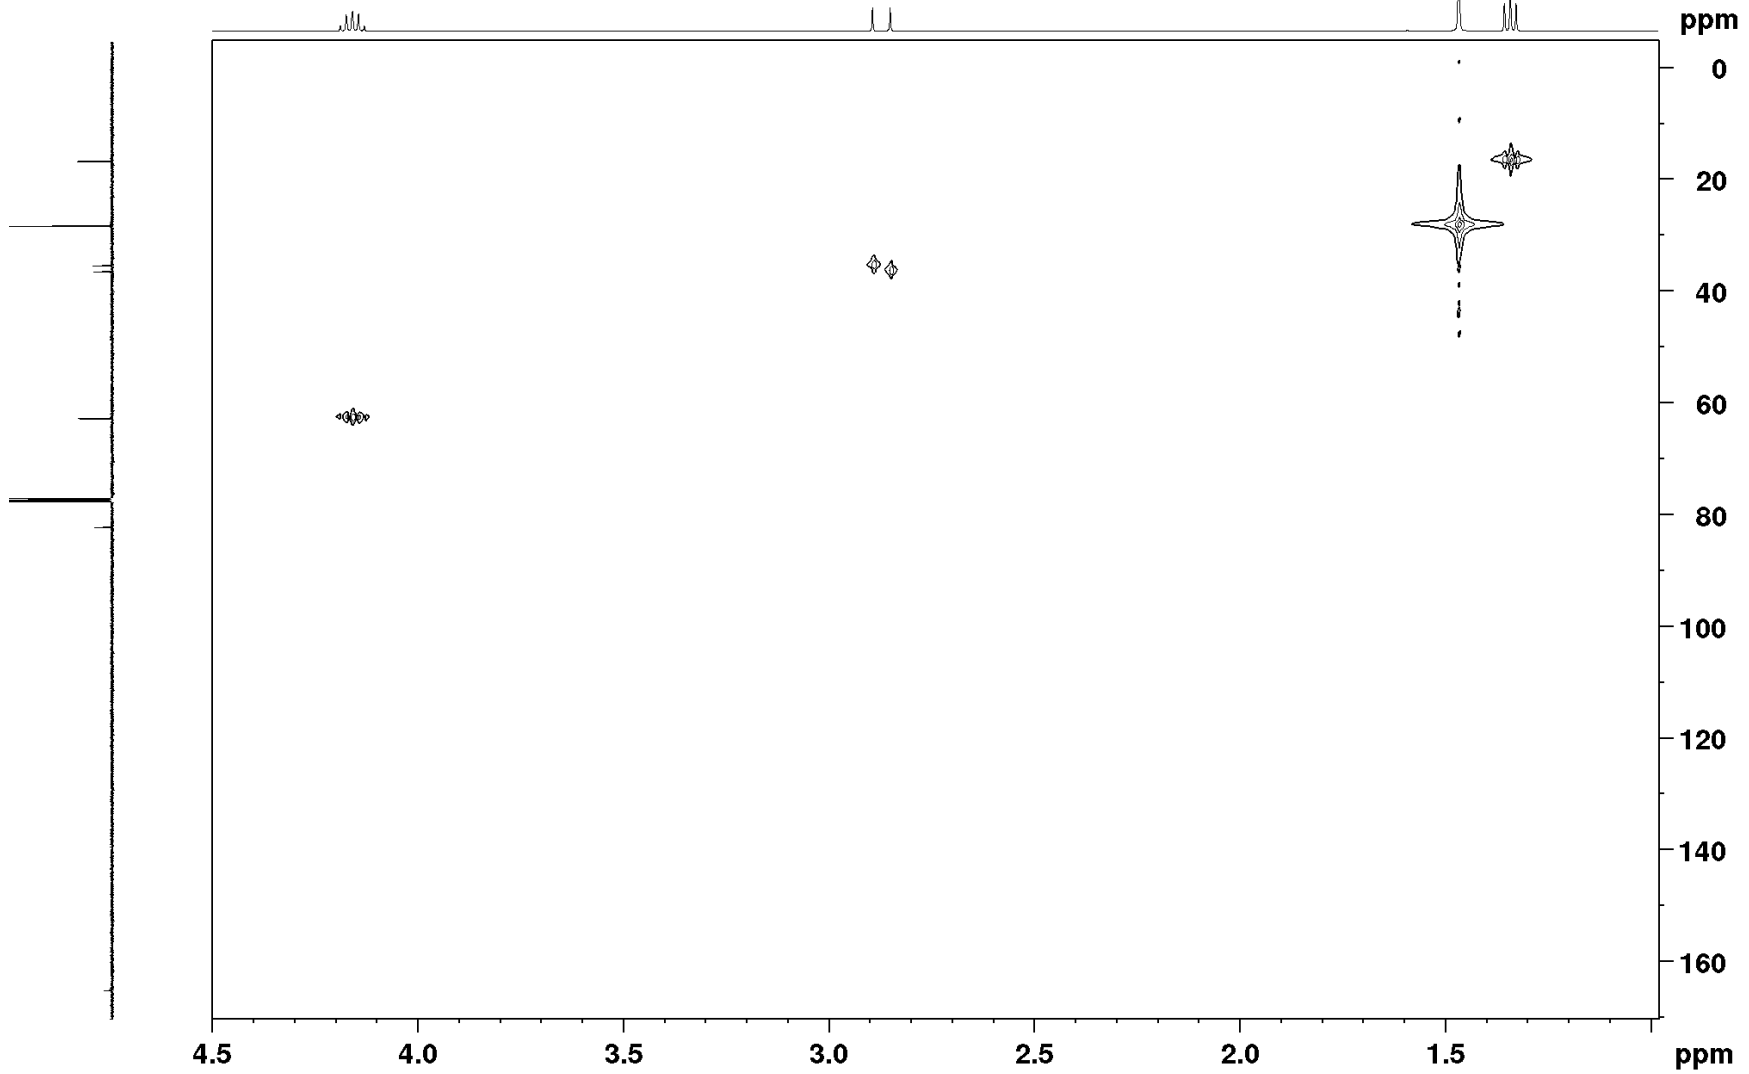

$^1\text{H}$ - $^{13}\text{C}$  HMBC

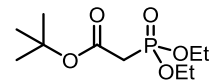

S4

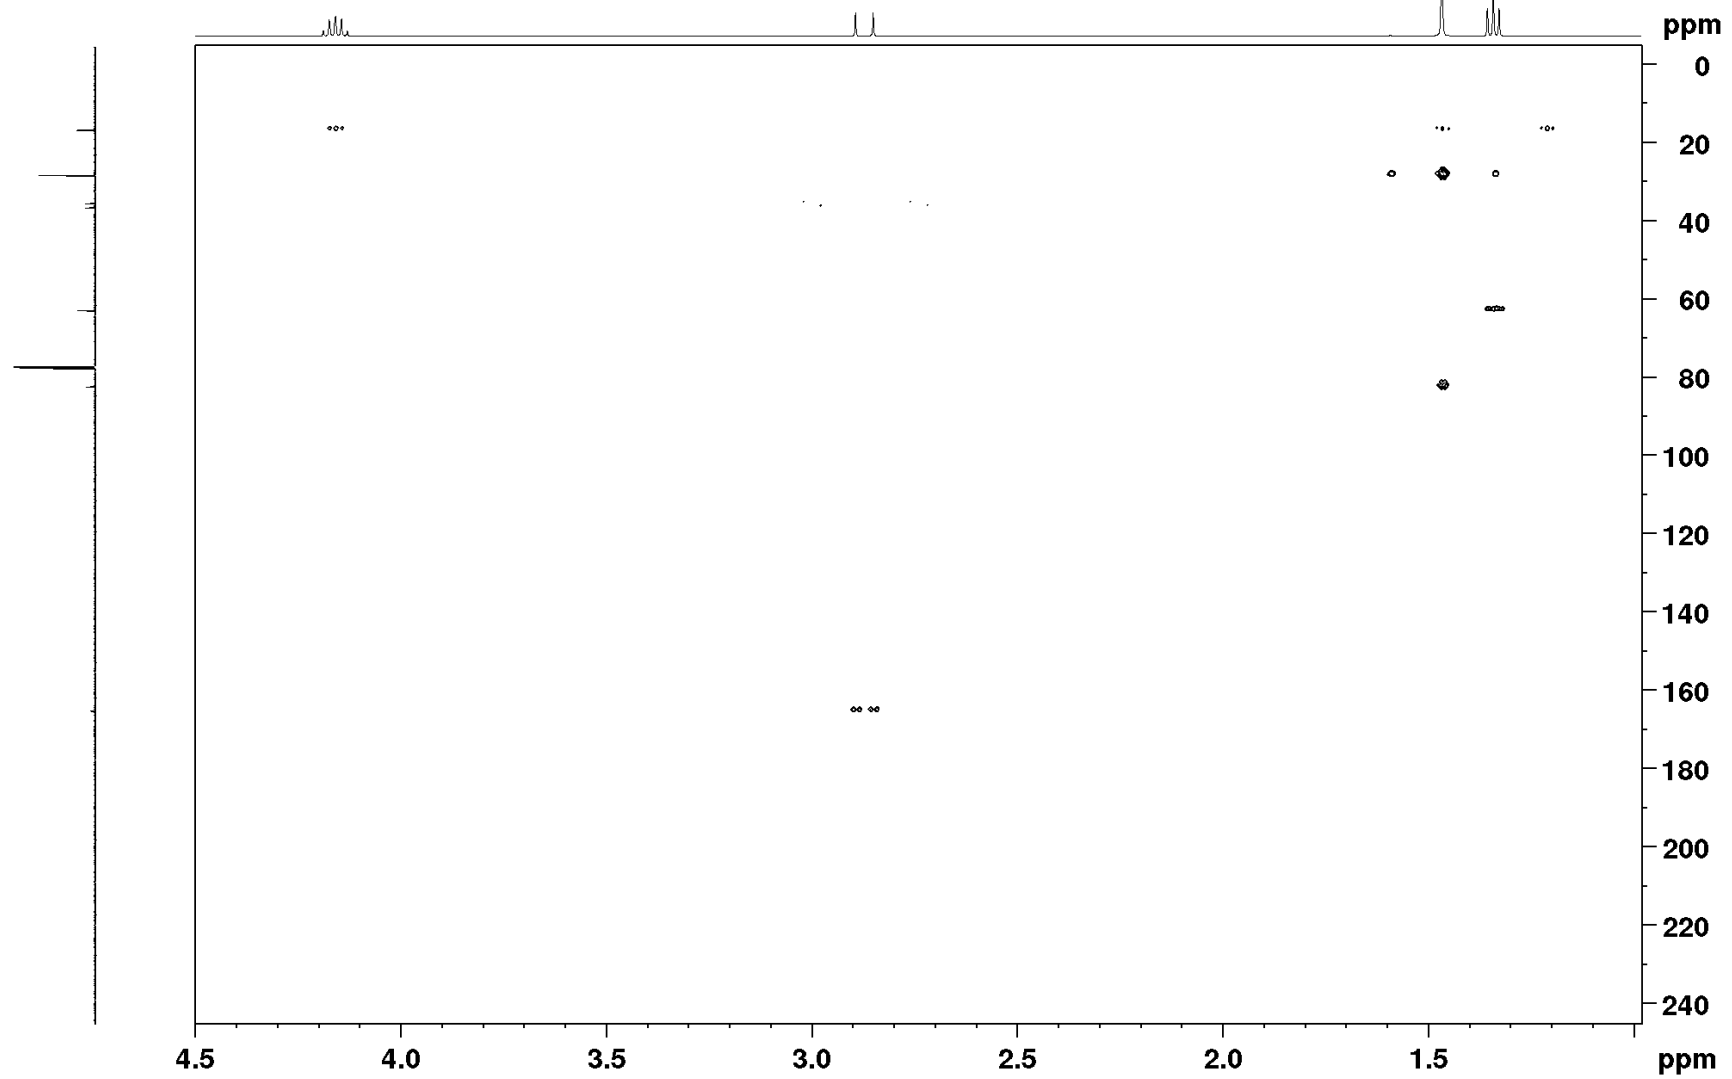

S520

<sup>31</sup>P NMR

20.70  
20.65  
20.62  
20.58  
20.55  
20.51  
20.47  
20.44  
20.40  
20.36  
20.32

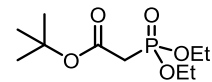

S4

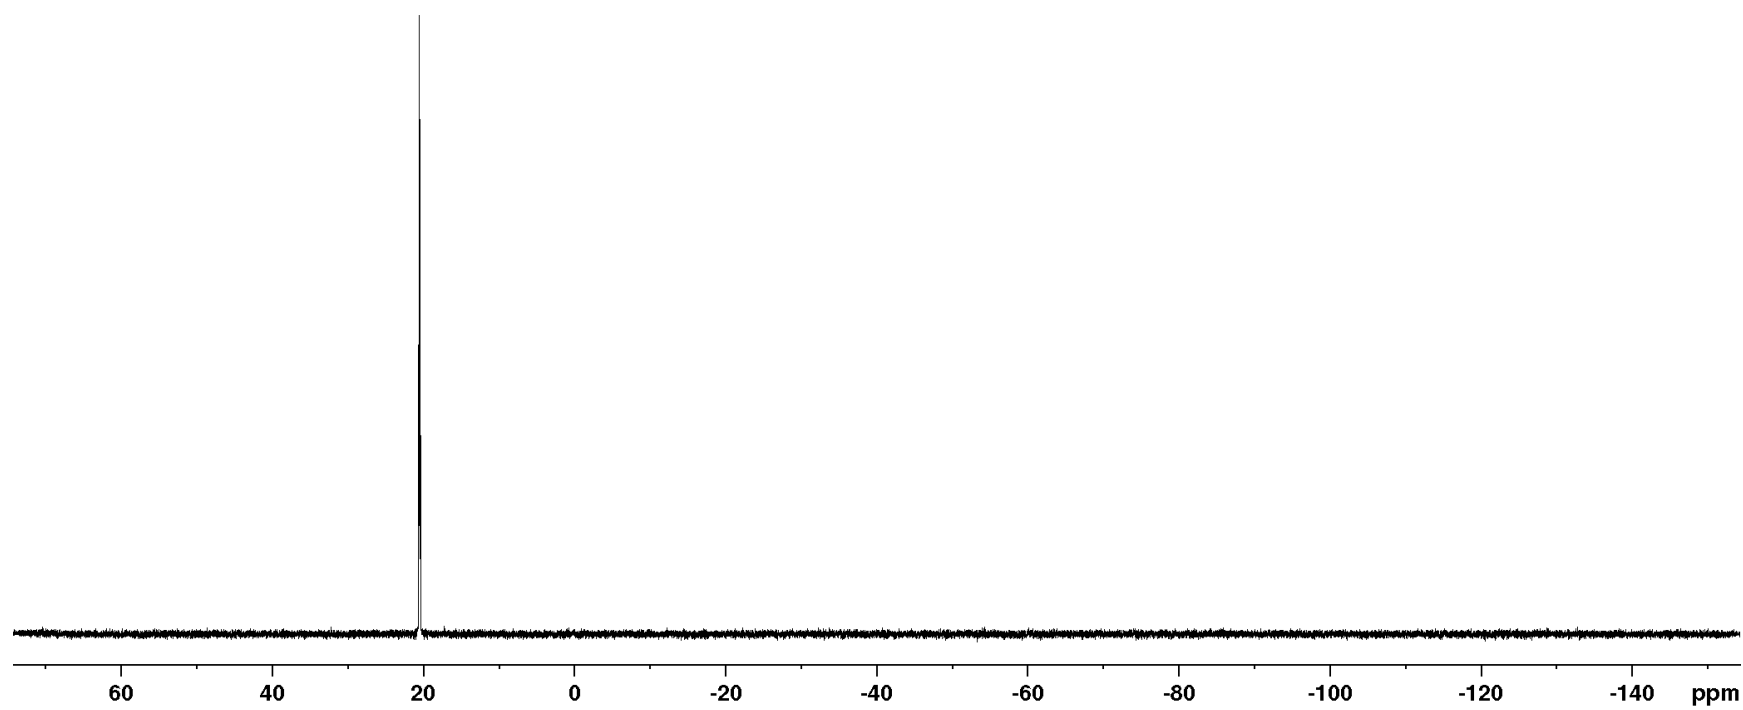

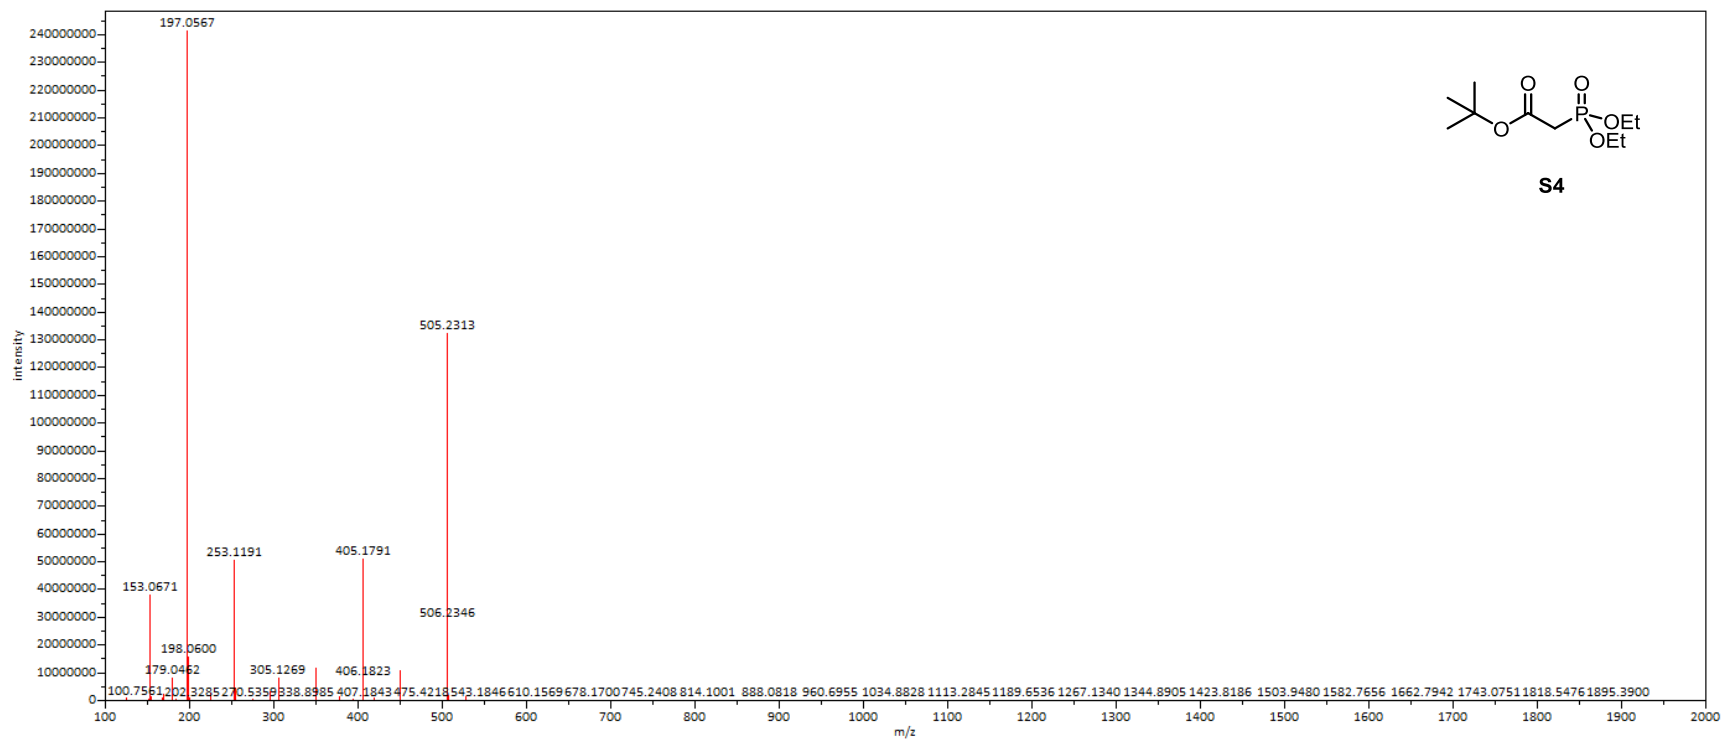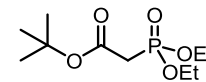

S4

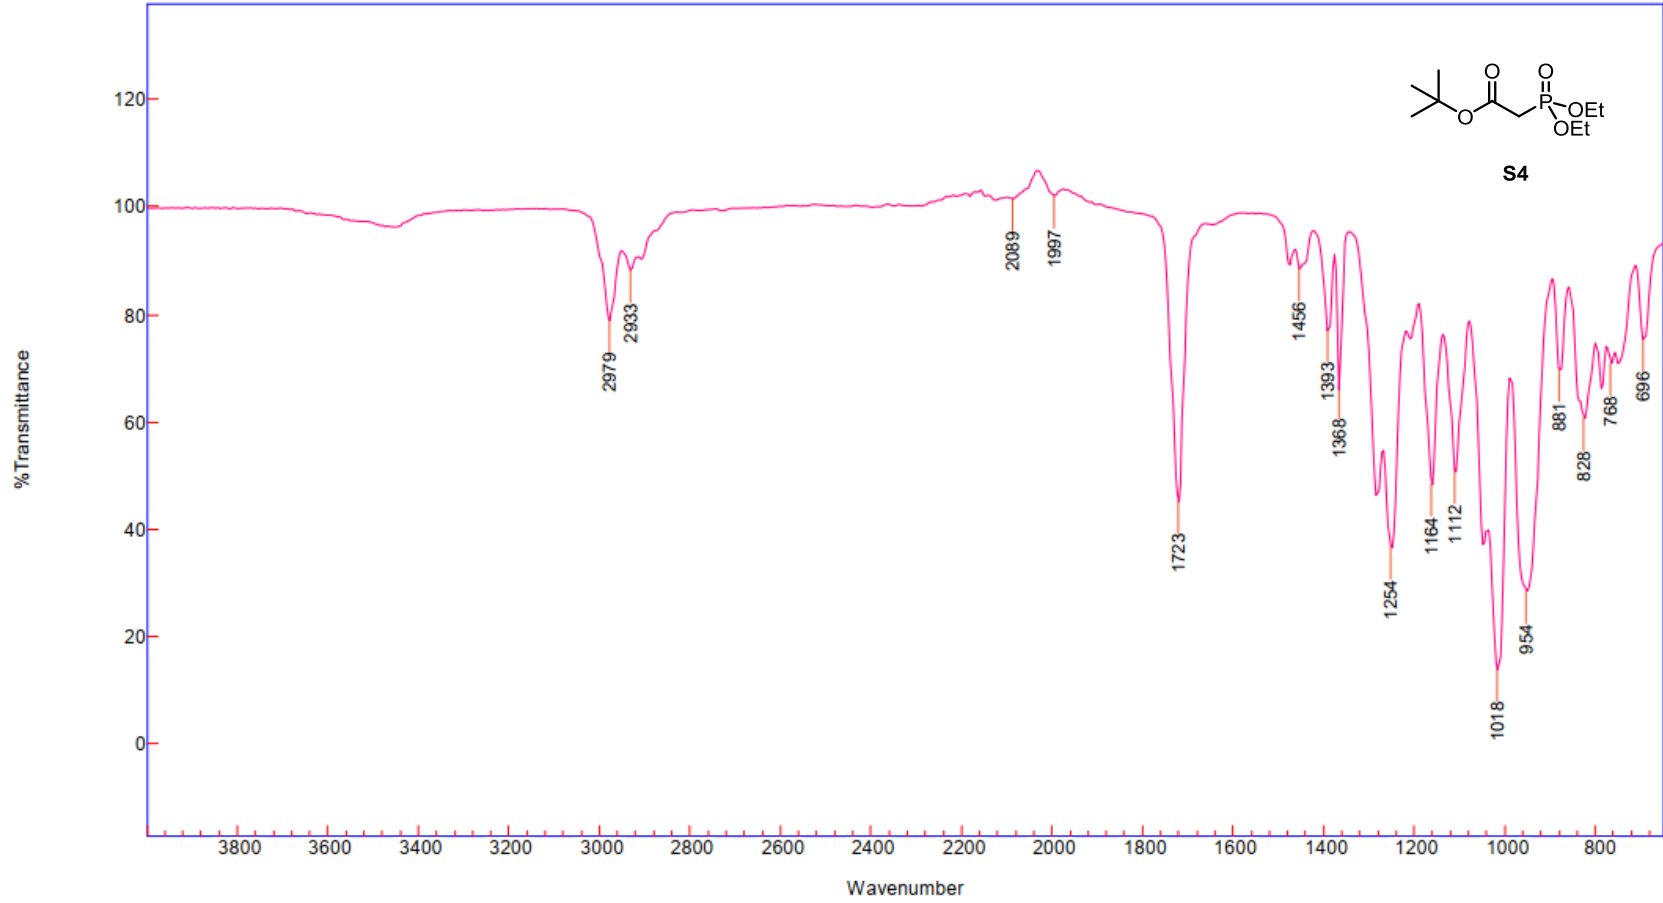

**Chloro-N,N-diethylacetamide (S5)**

<sup>1</sup>H NMR

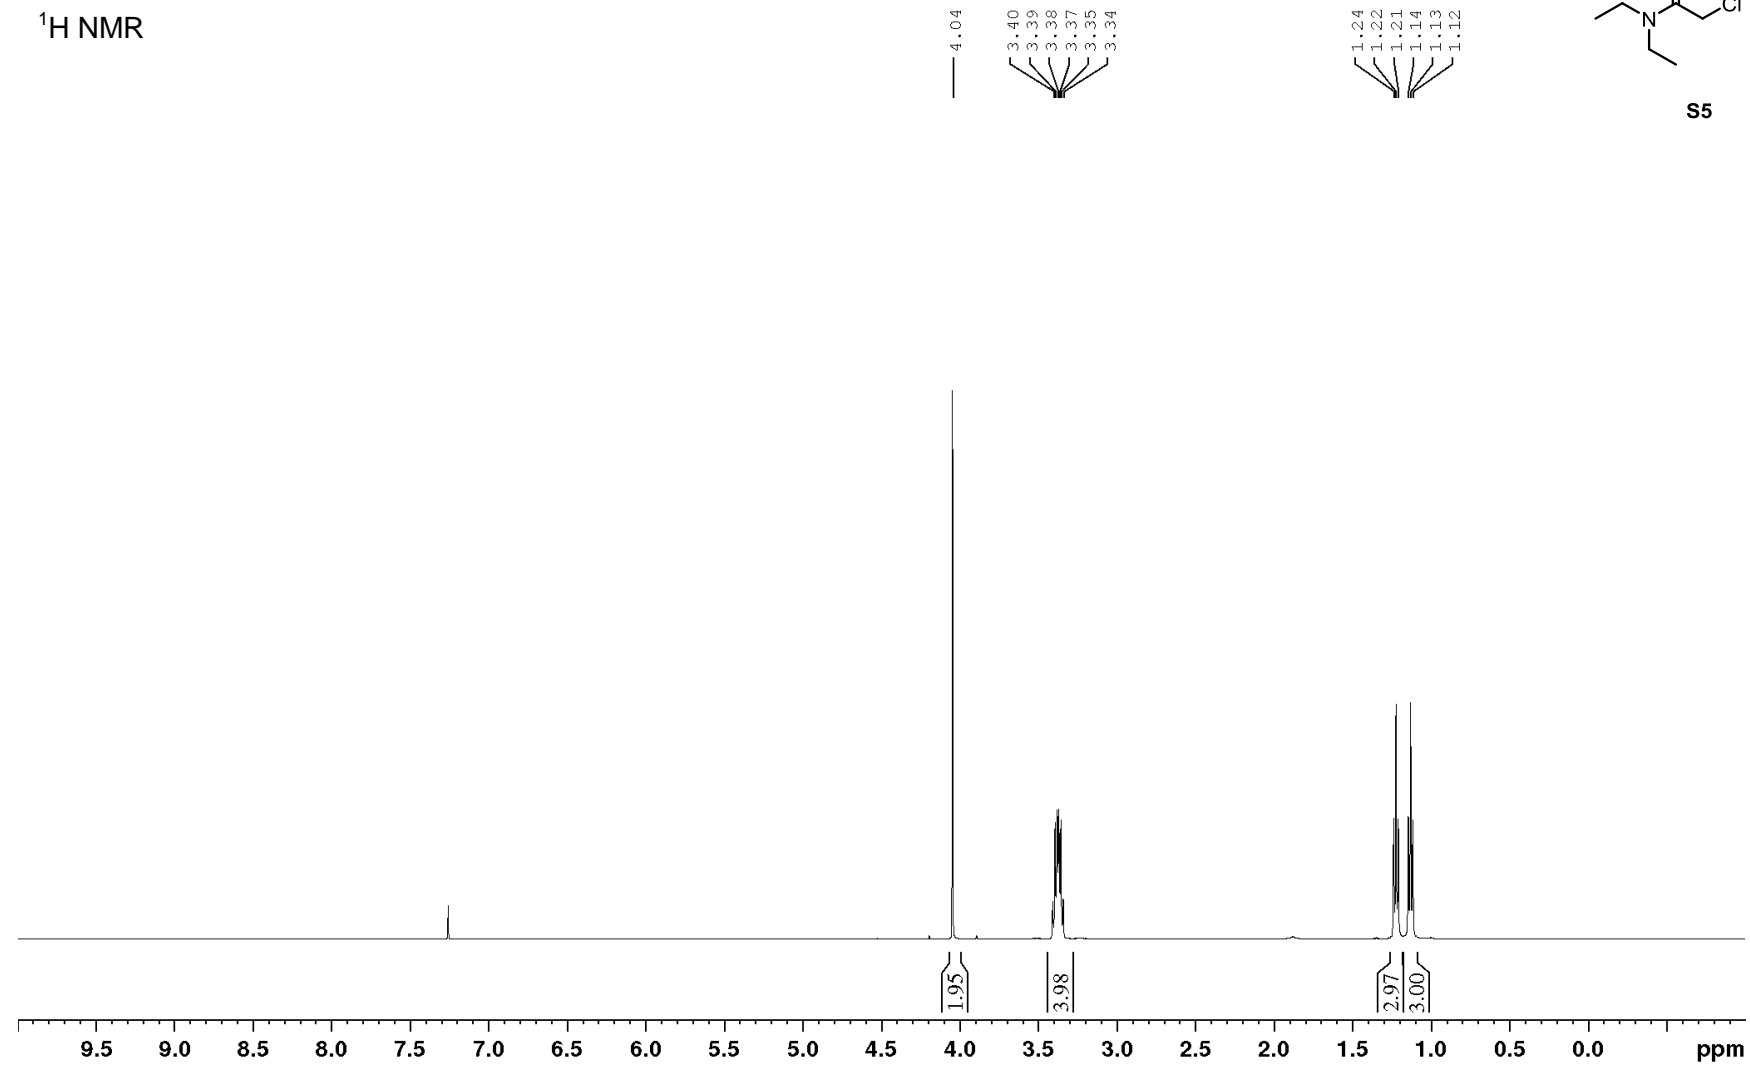



$^{13}\text{C}$  NMR

165.8

42.6  
41.4  
40.7

14.5  
12.8

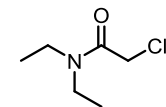

S5

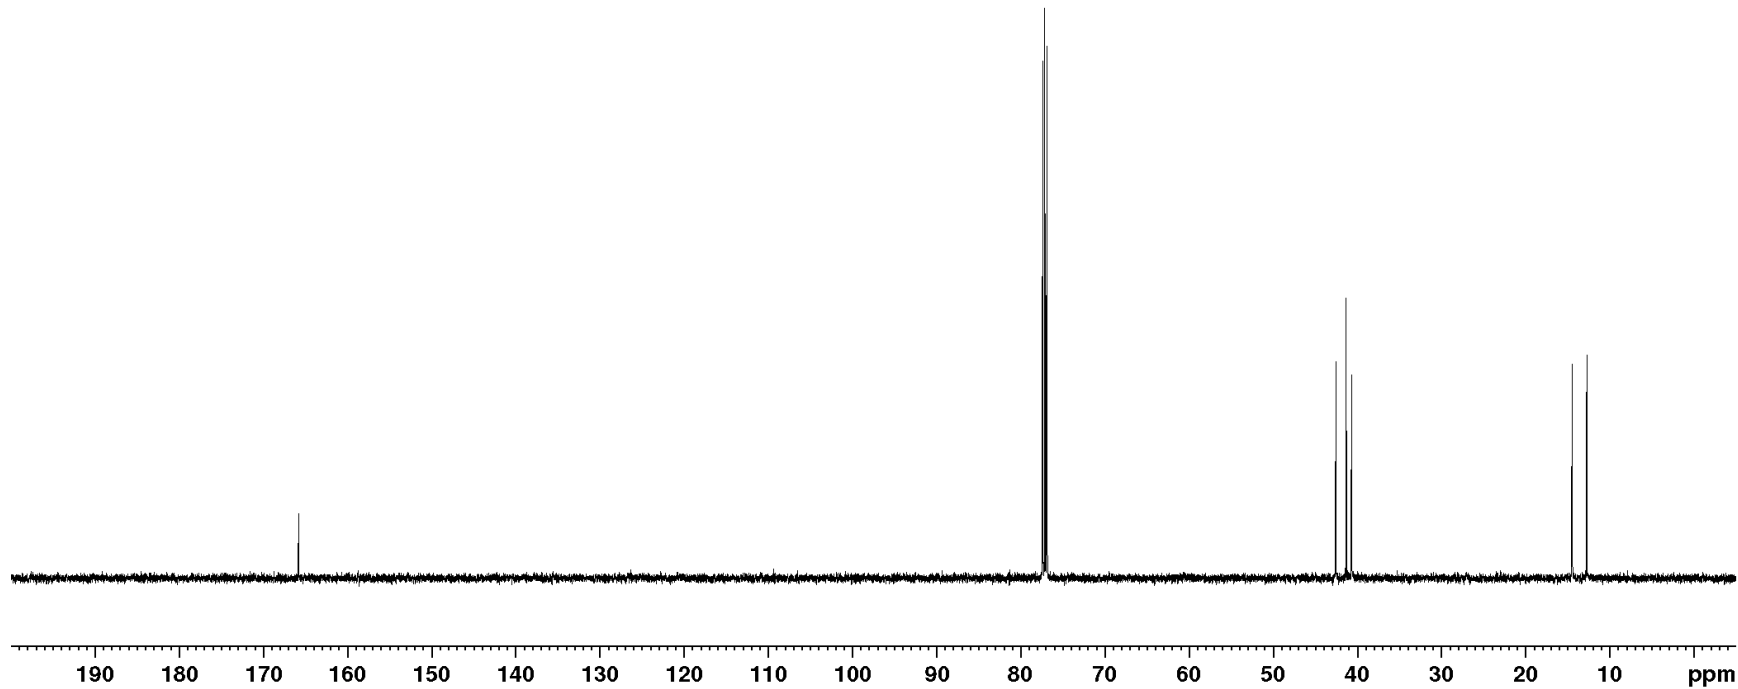

S525

<sup>13</sup>C DEPT NMR

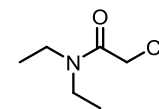

S5

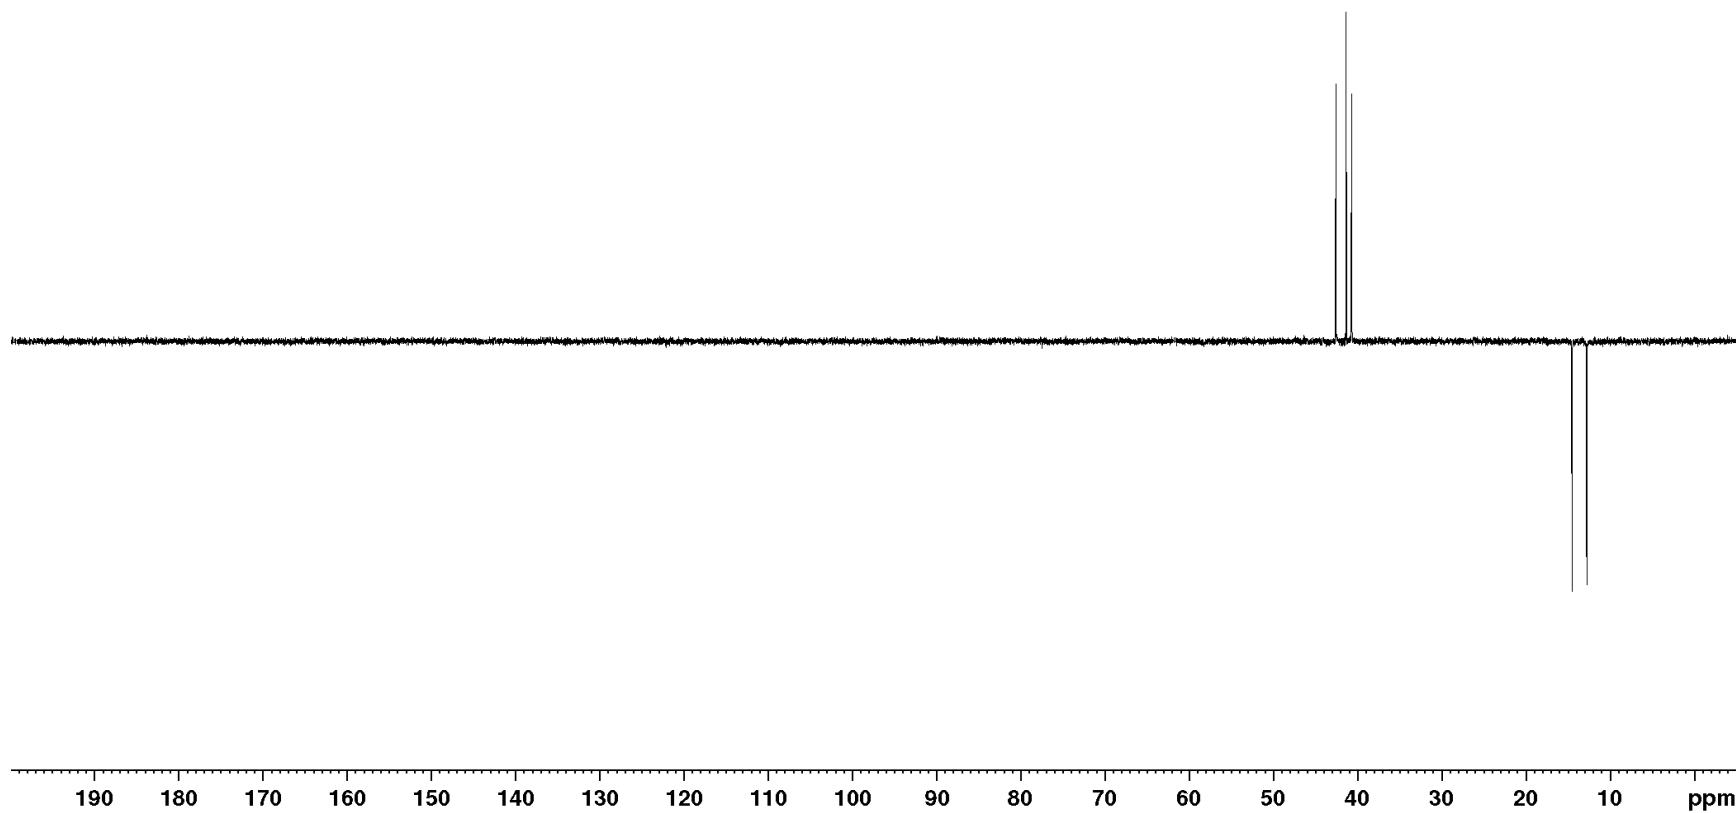

S526

$^1\text{H}$ - $^1\text{H}$  COSY

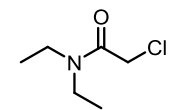

S5

ppm

0.5

1.0

1.5

2.0

2.5

3.0

3.5

4.0

ppm

4.0

3.5

3.0

2.5

2.0

1.5

1.0

0.5

S527

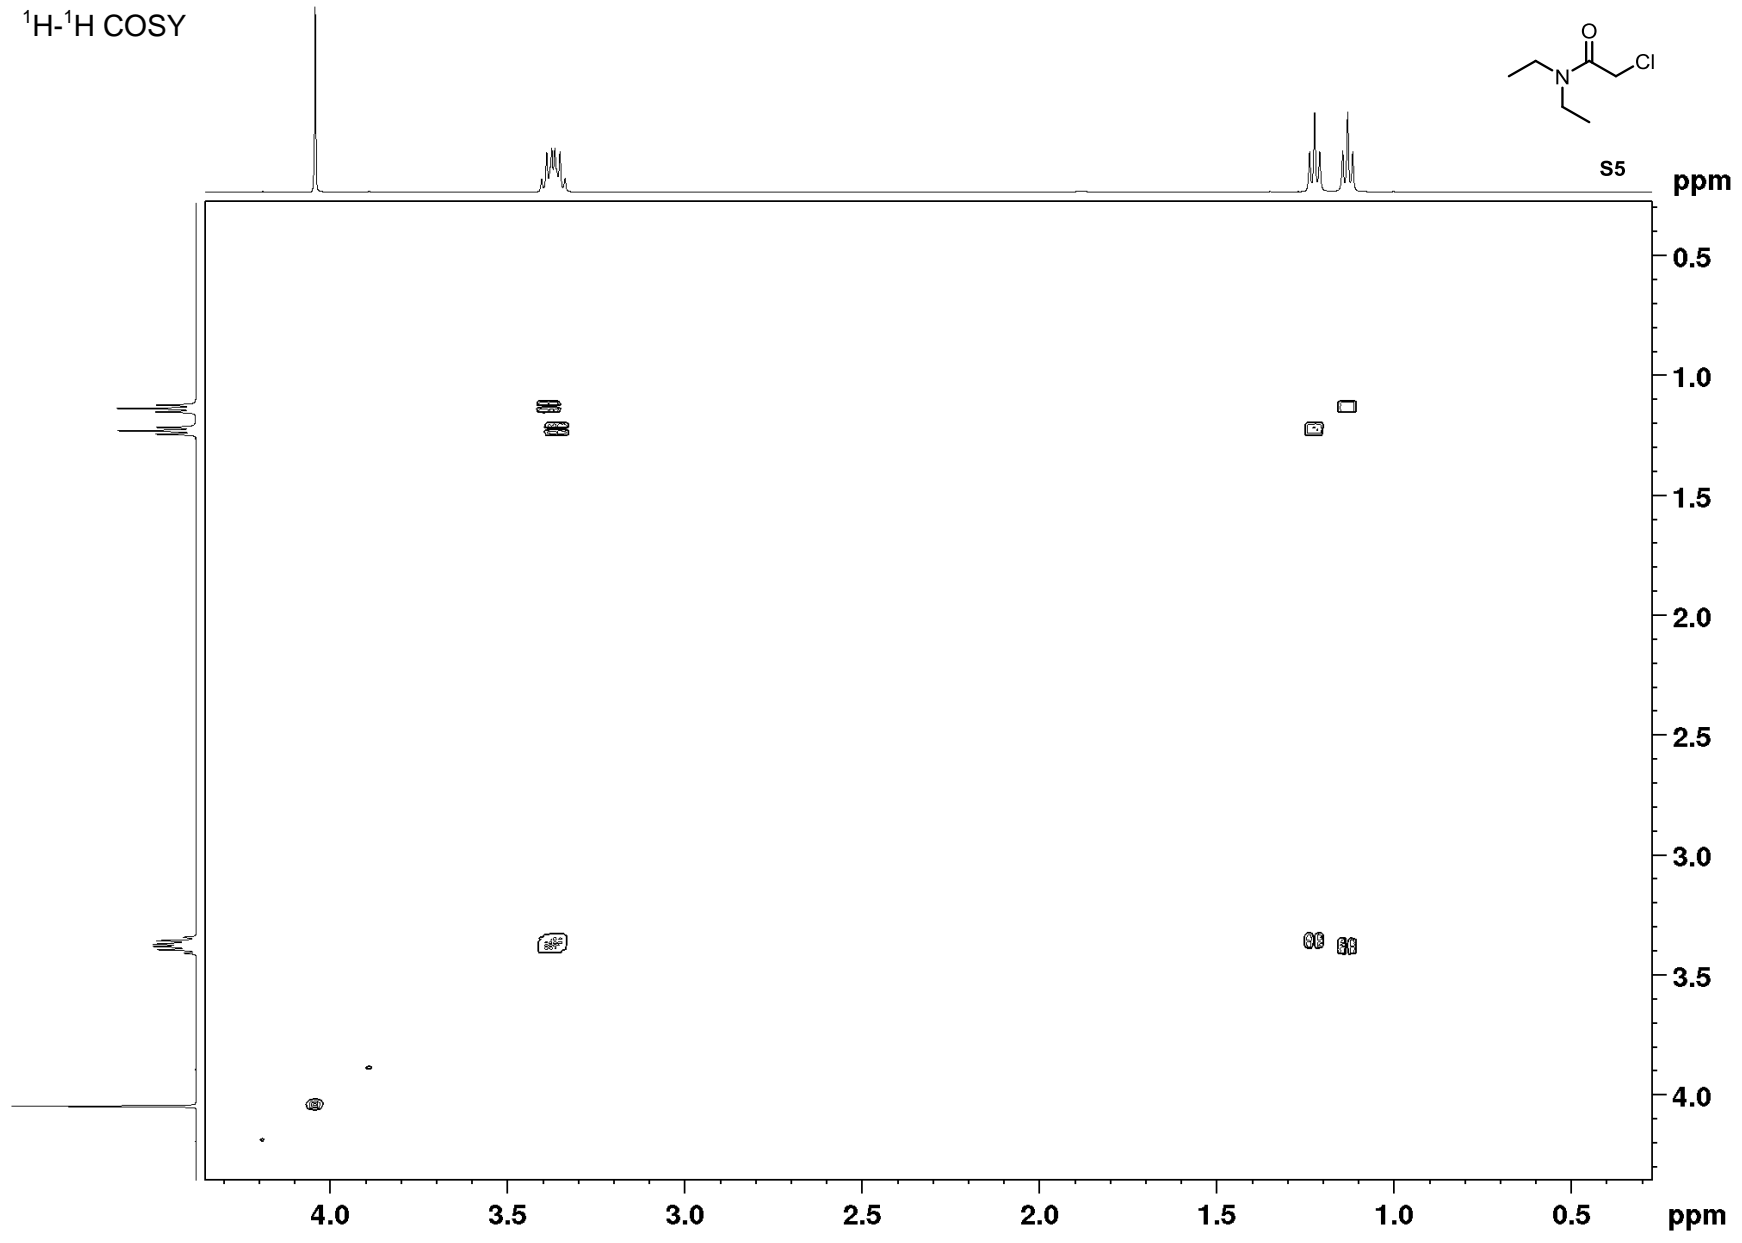

$^1\text{H}$ - $^{13}\text{C}$  HMQC

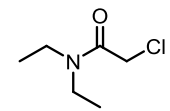

S5

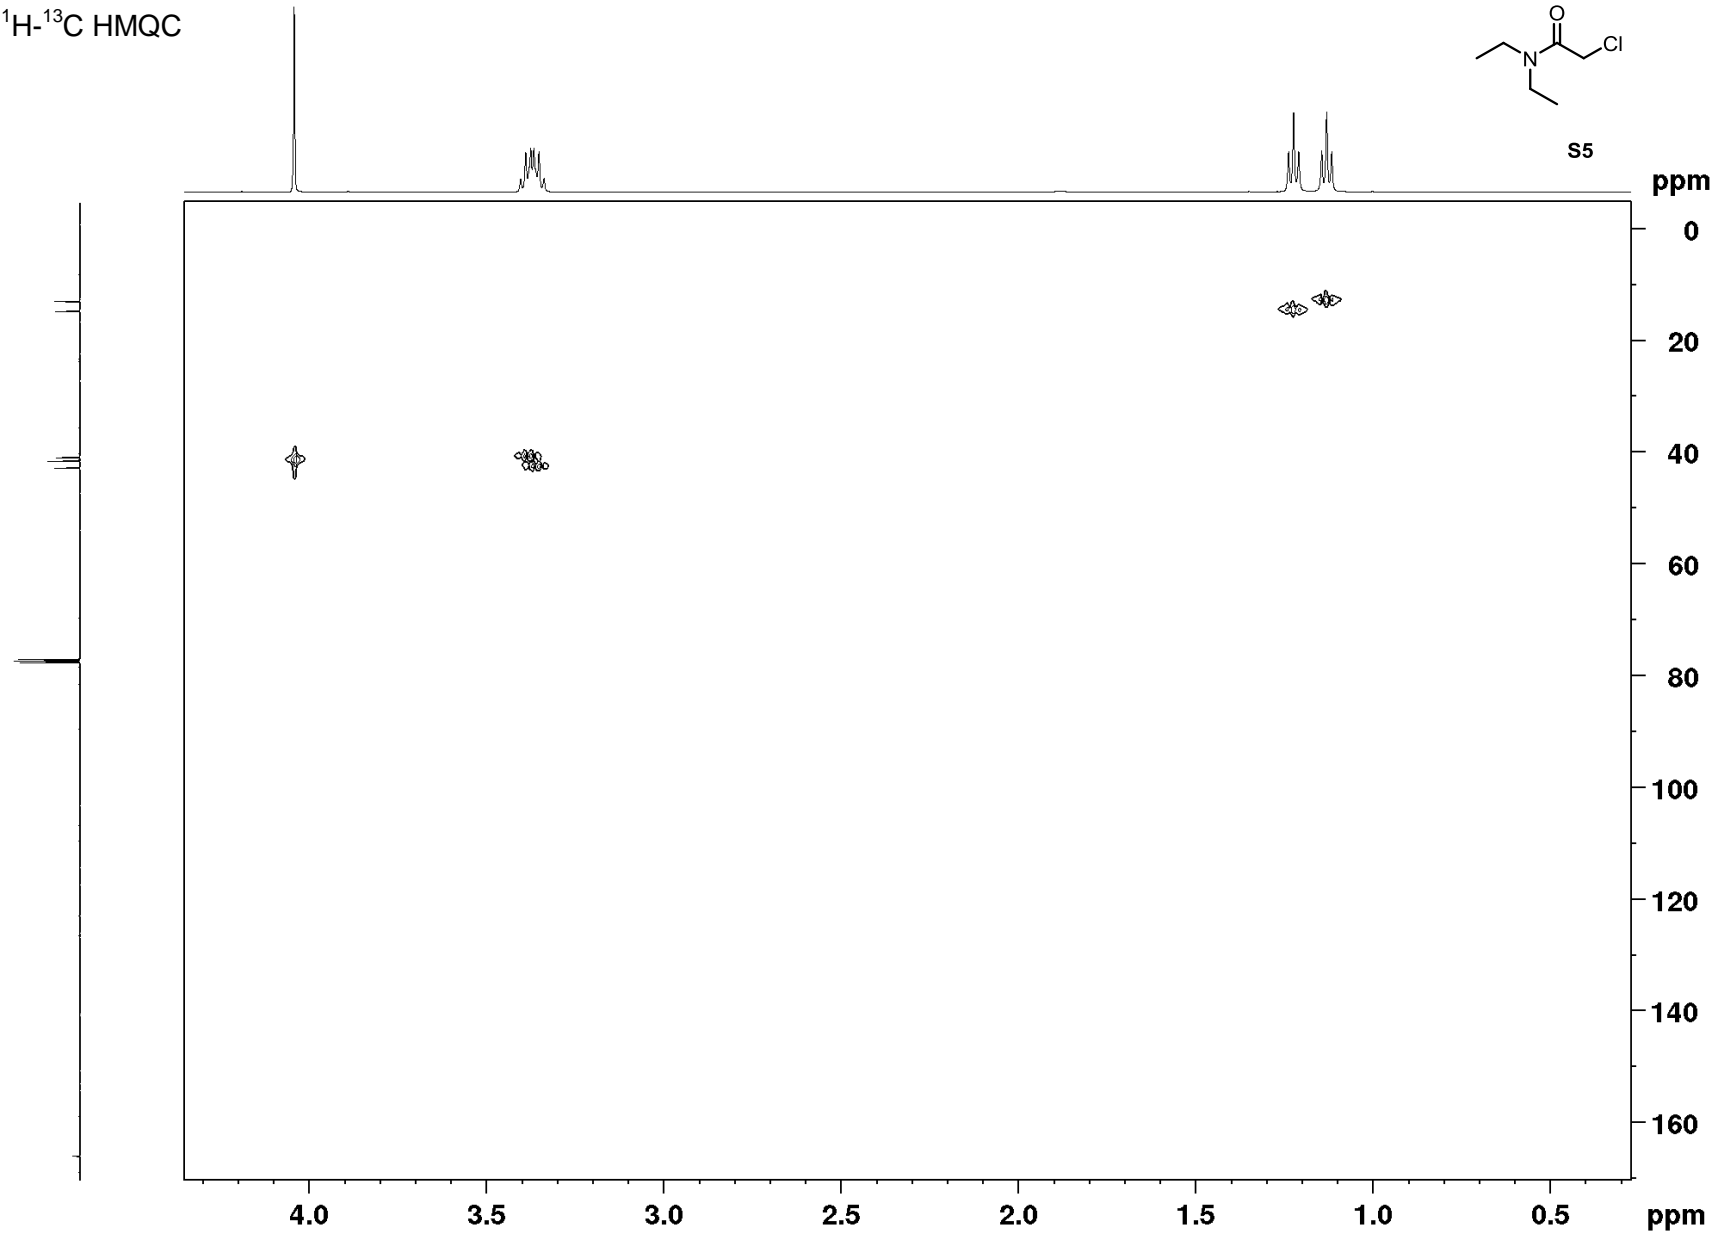

S528

$^1\text{H}$ - $^{13}\text{C}$  HMBC

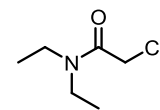

S5

ppm

0

20

40

60

80

100

120

140

160

180

200

220

240

ppm

4.0

3.5

3.0

2.5

2.0

1.5

1.0

0.5

S529

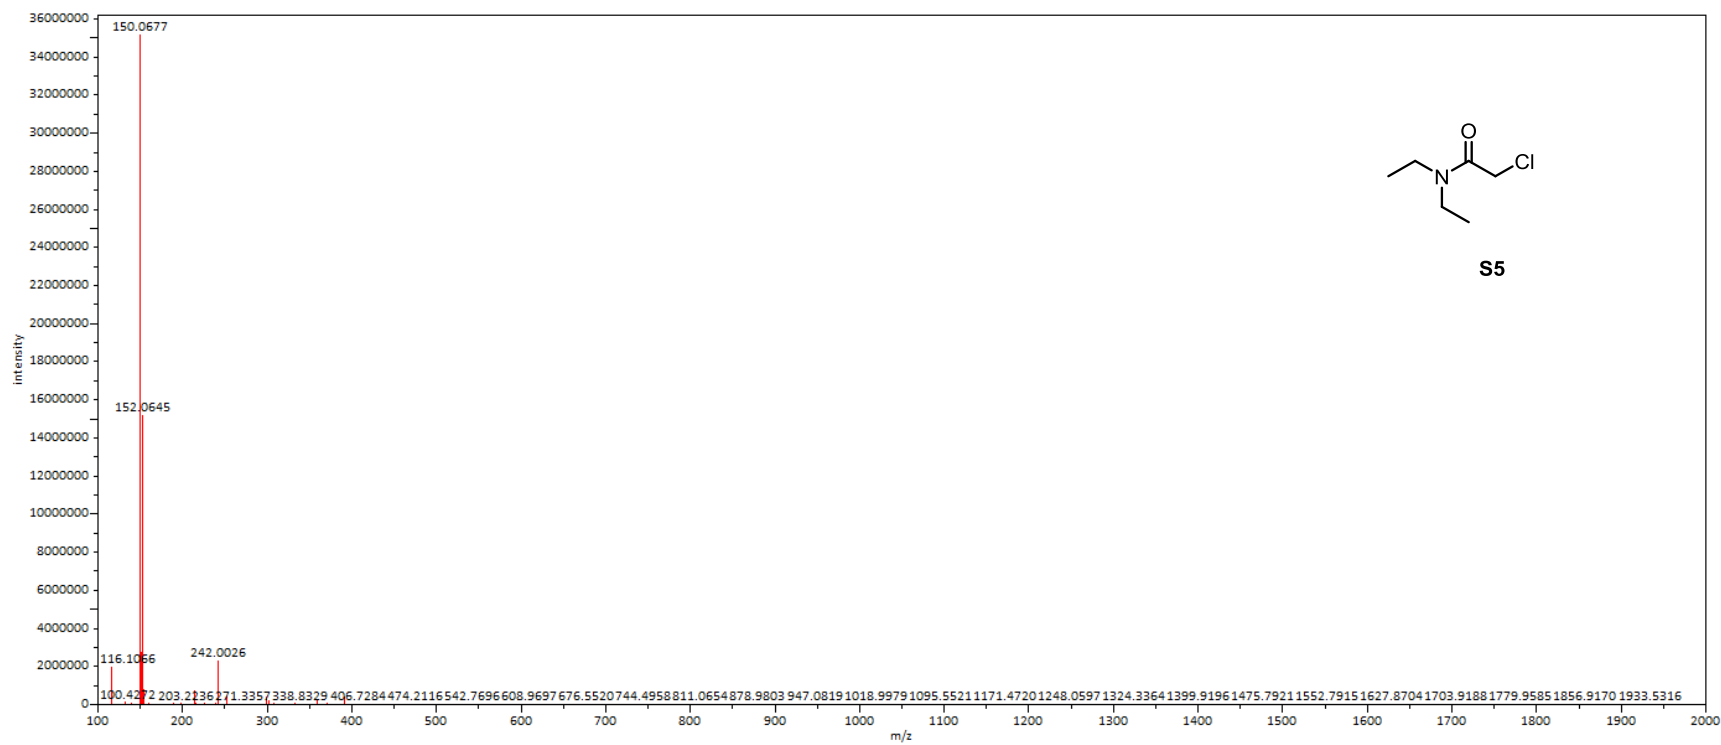

S530

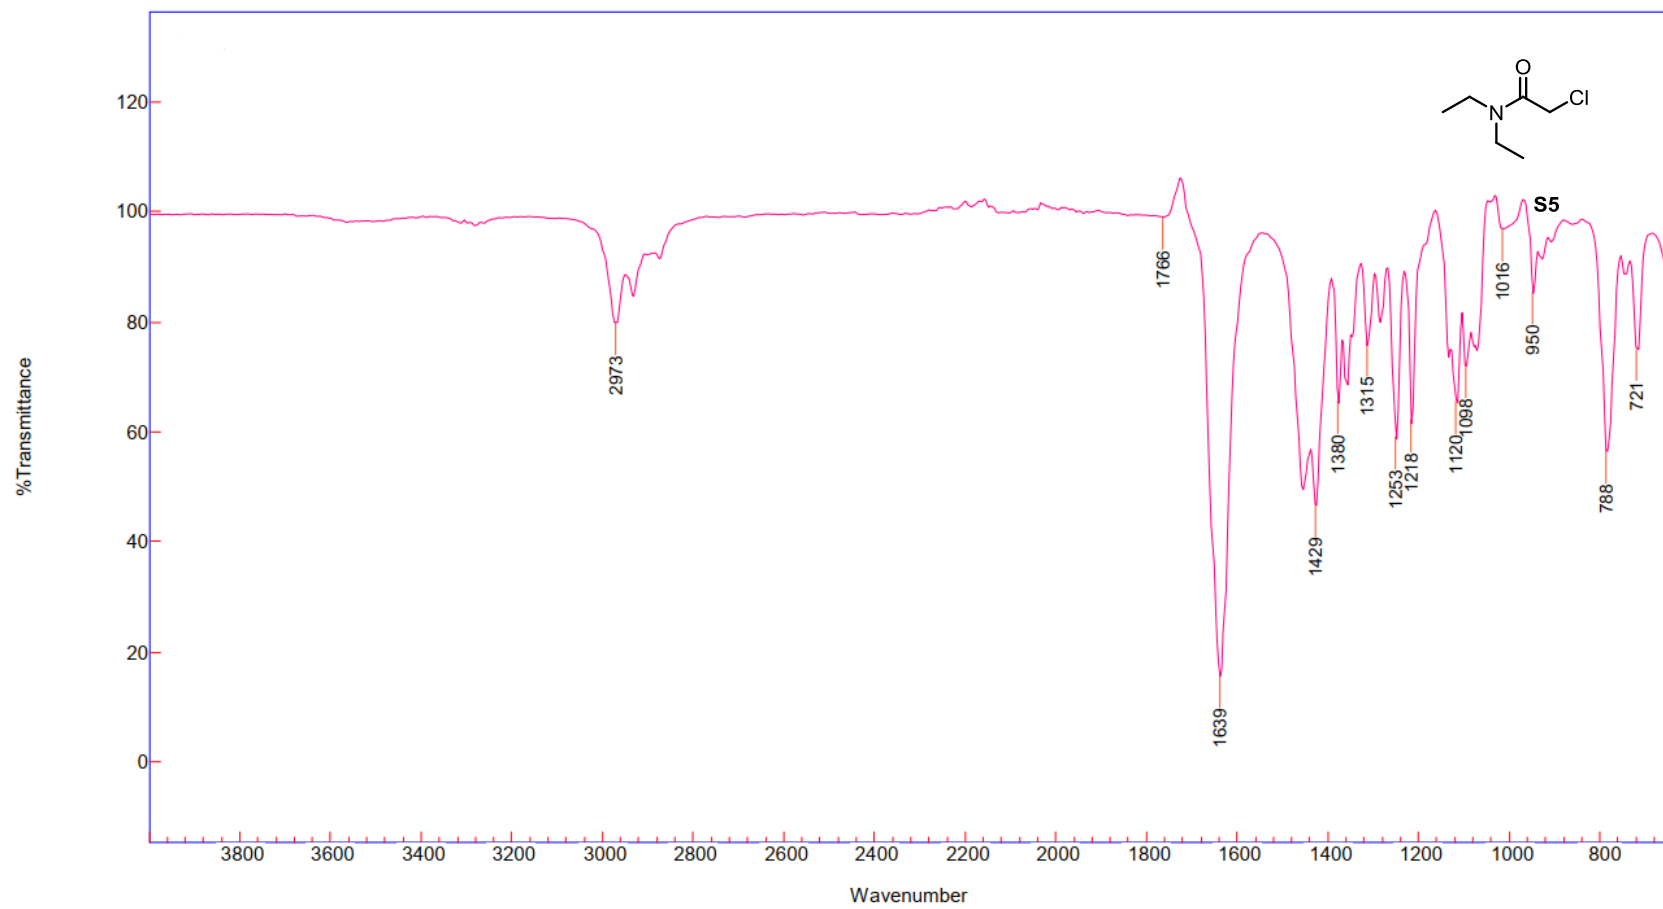

S531

# Diethyl (2-(diethylamino)-2-oxoethyl)phosphonate (S6)

<sup>1</sup>H NMR

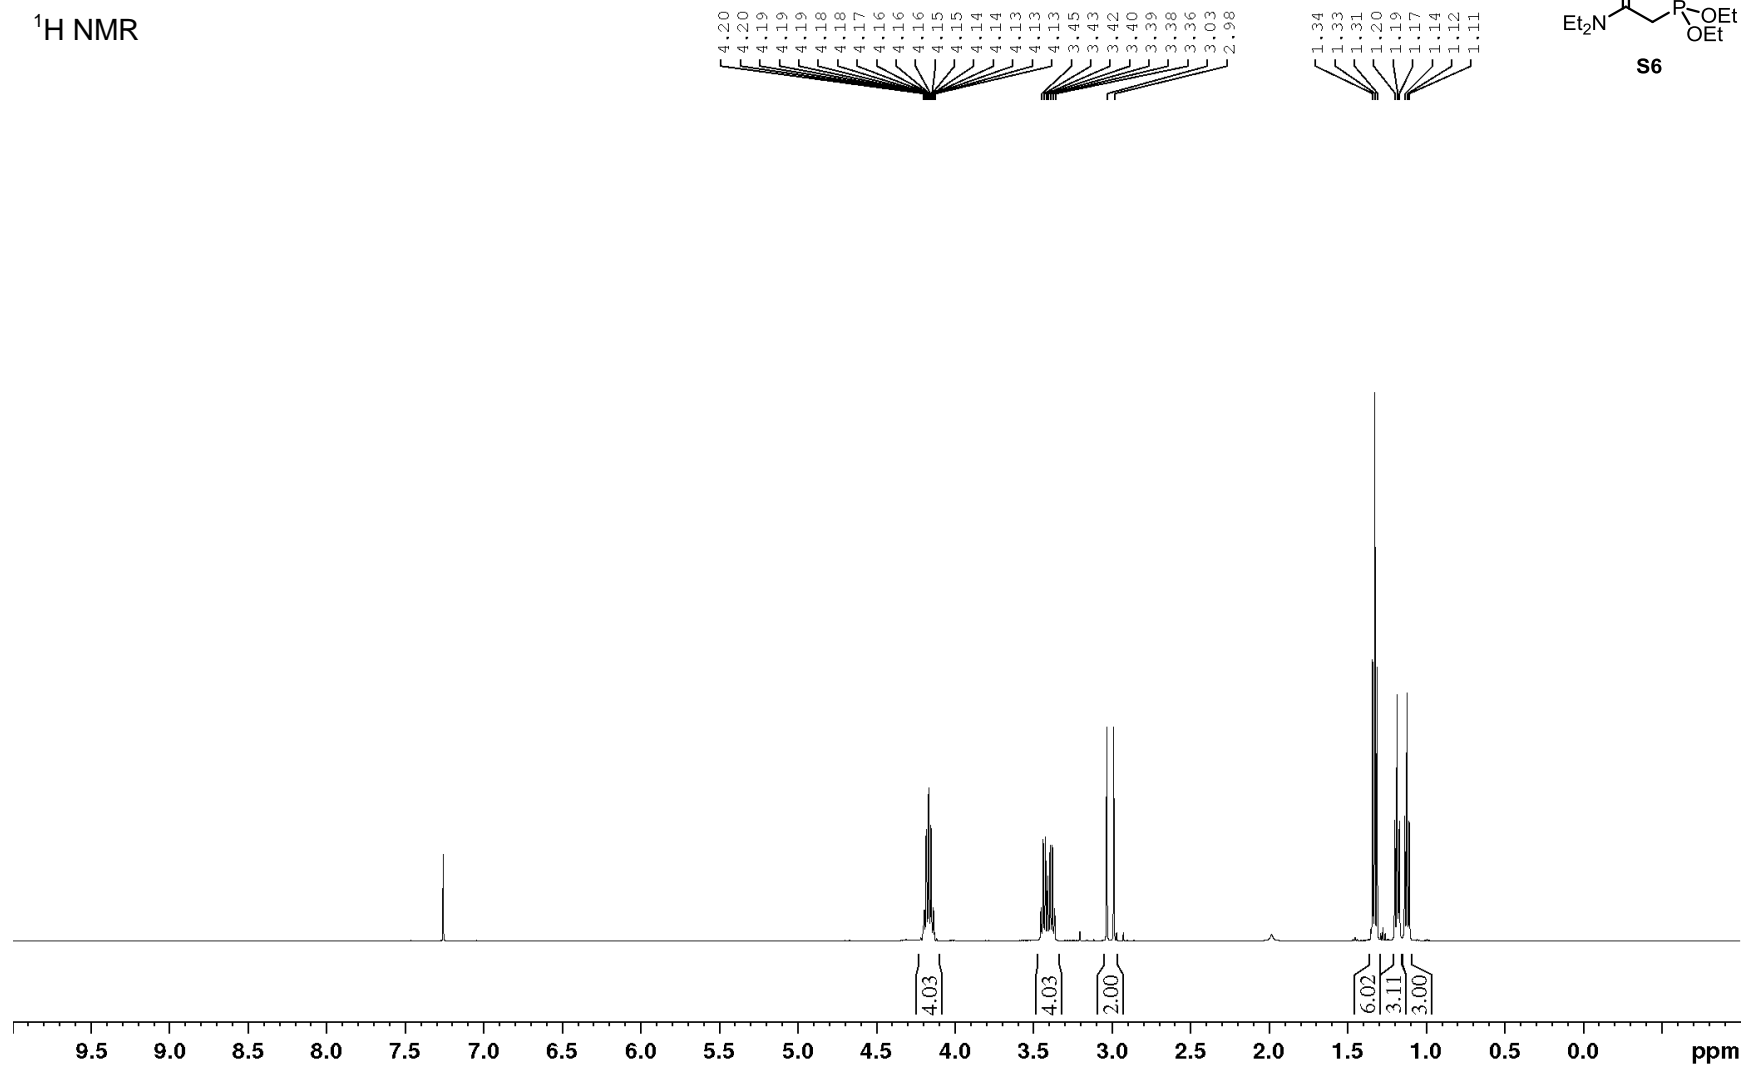



<sup>13</sup>C NMR

164.1  
164.0

62.7  
62.6

43.1  
40.6

34.1  
33.0

16.5  
16.4  
14.3  
13.0

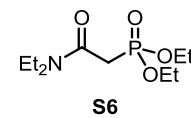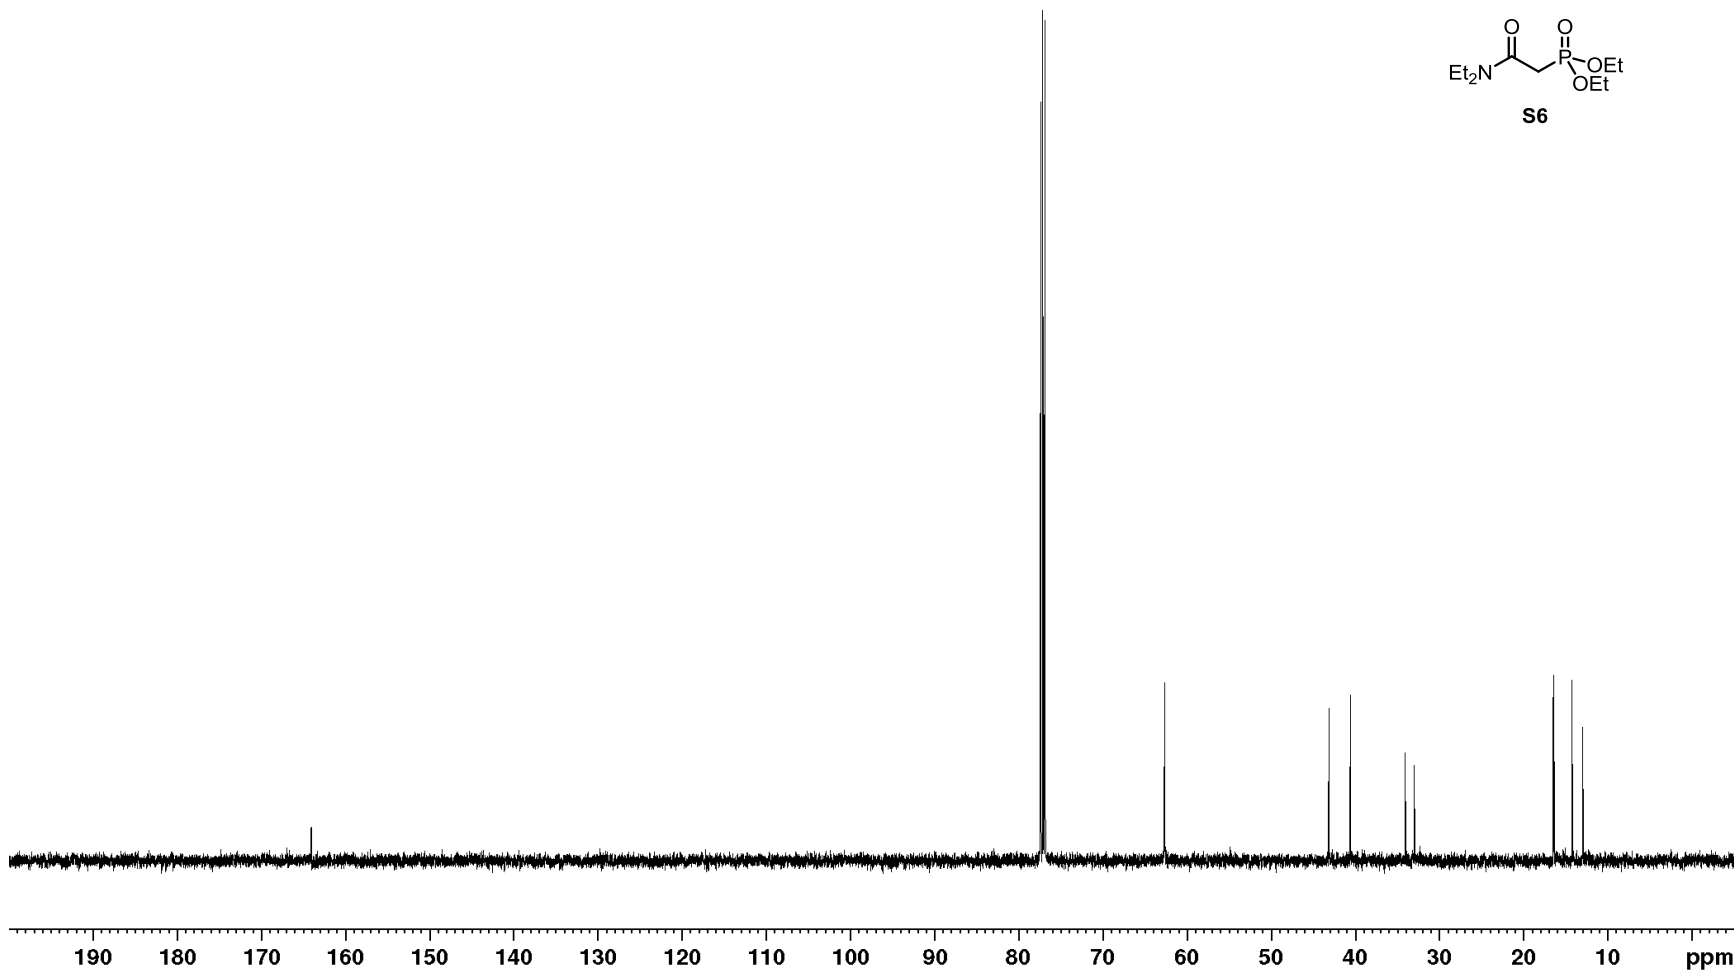

<sup>13</sup>C DEPT NMR

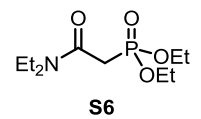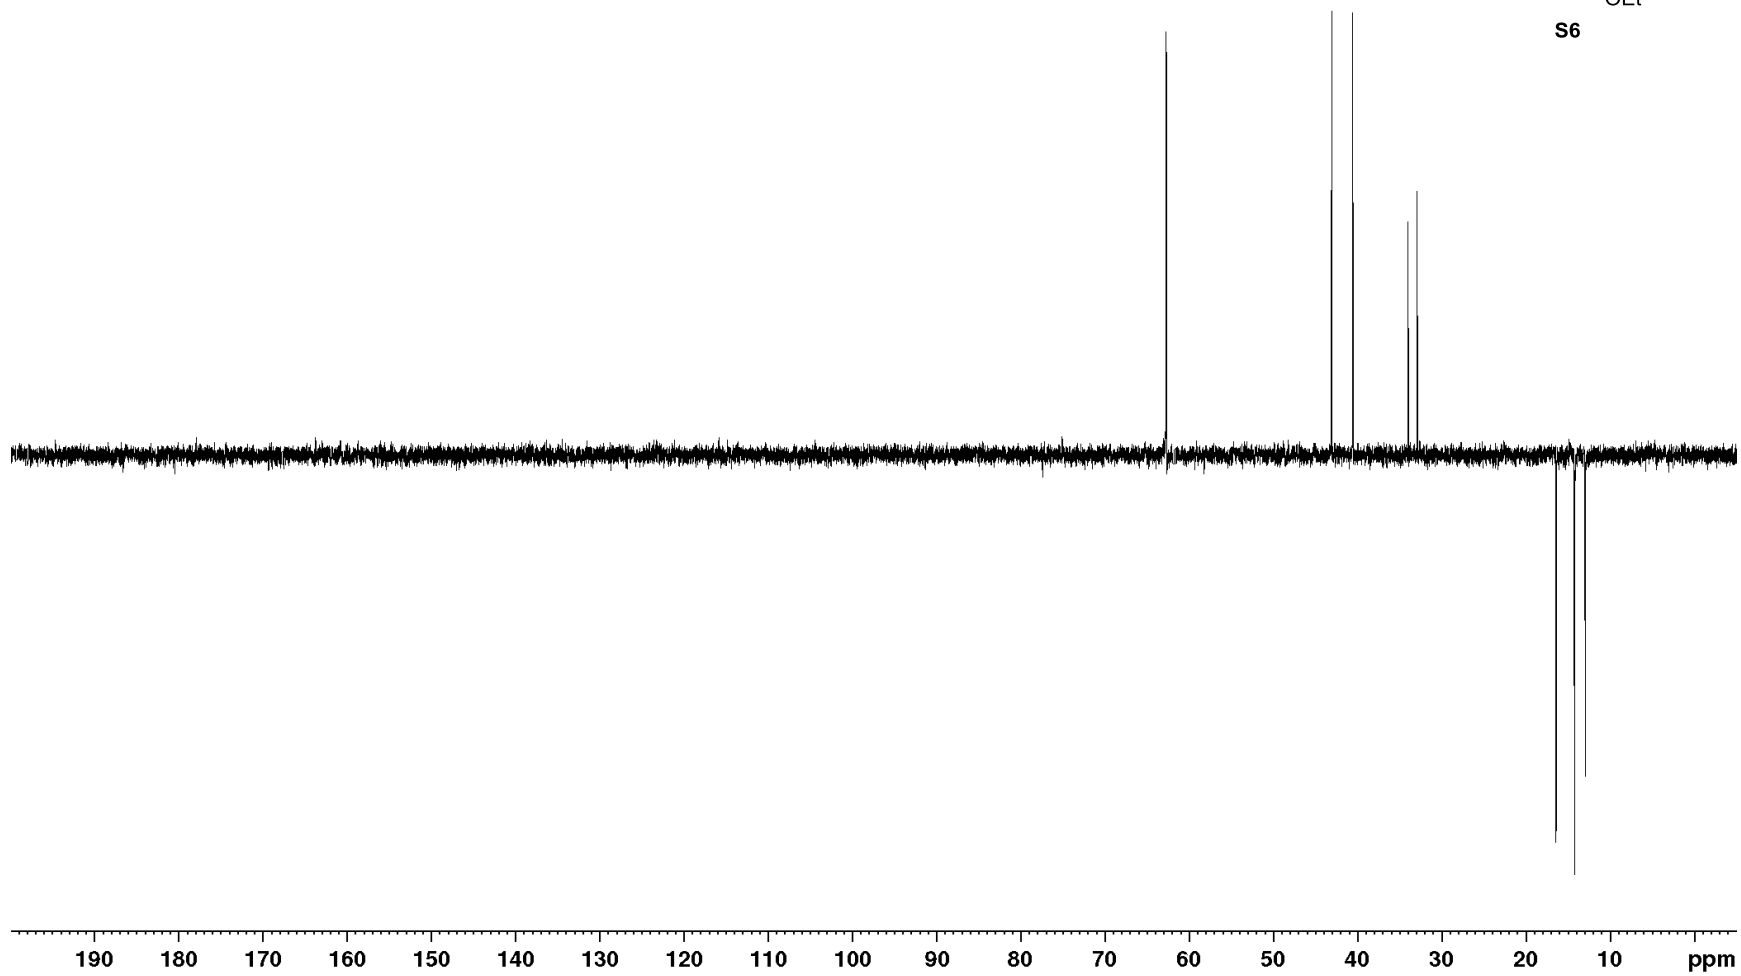

$^1\text{H}$ - $^1\text{H}$  COSY

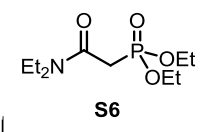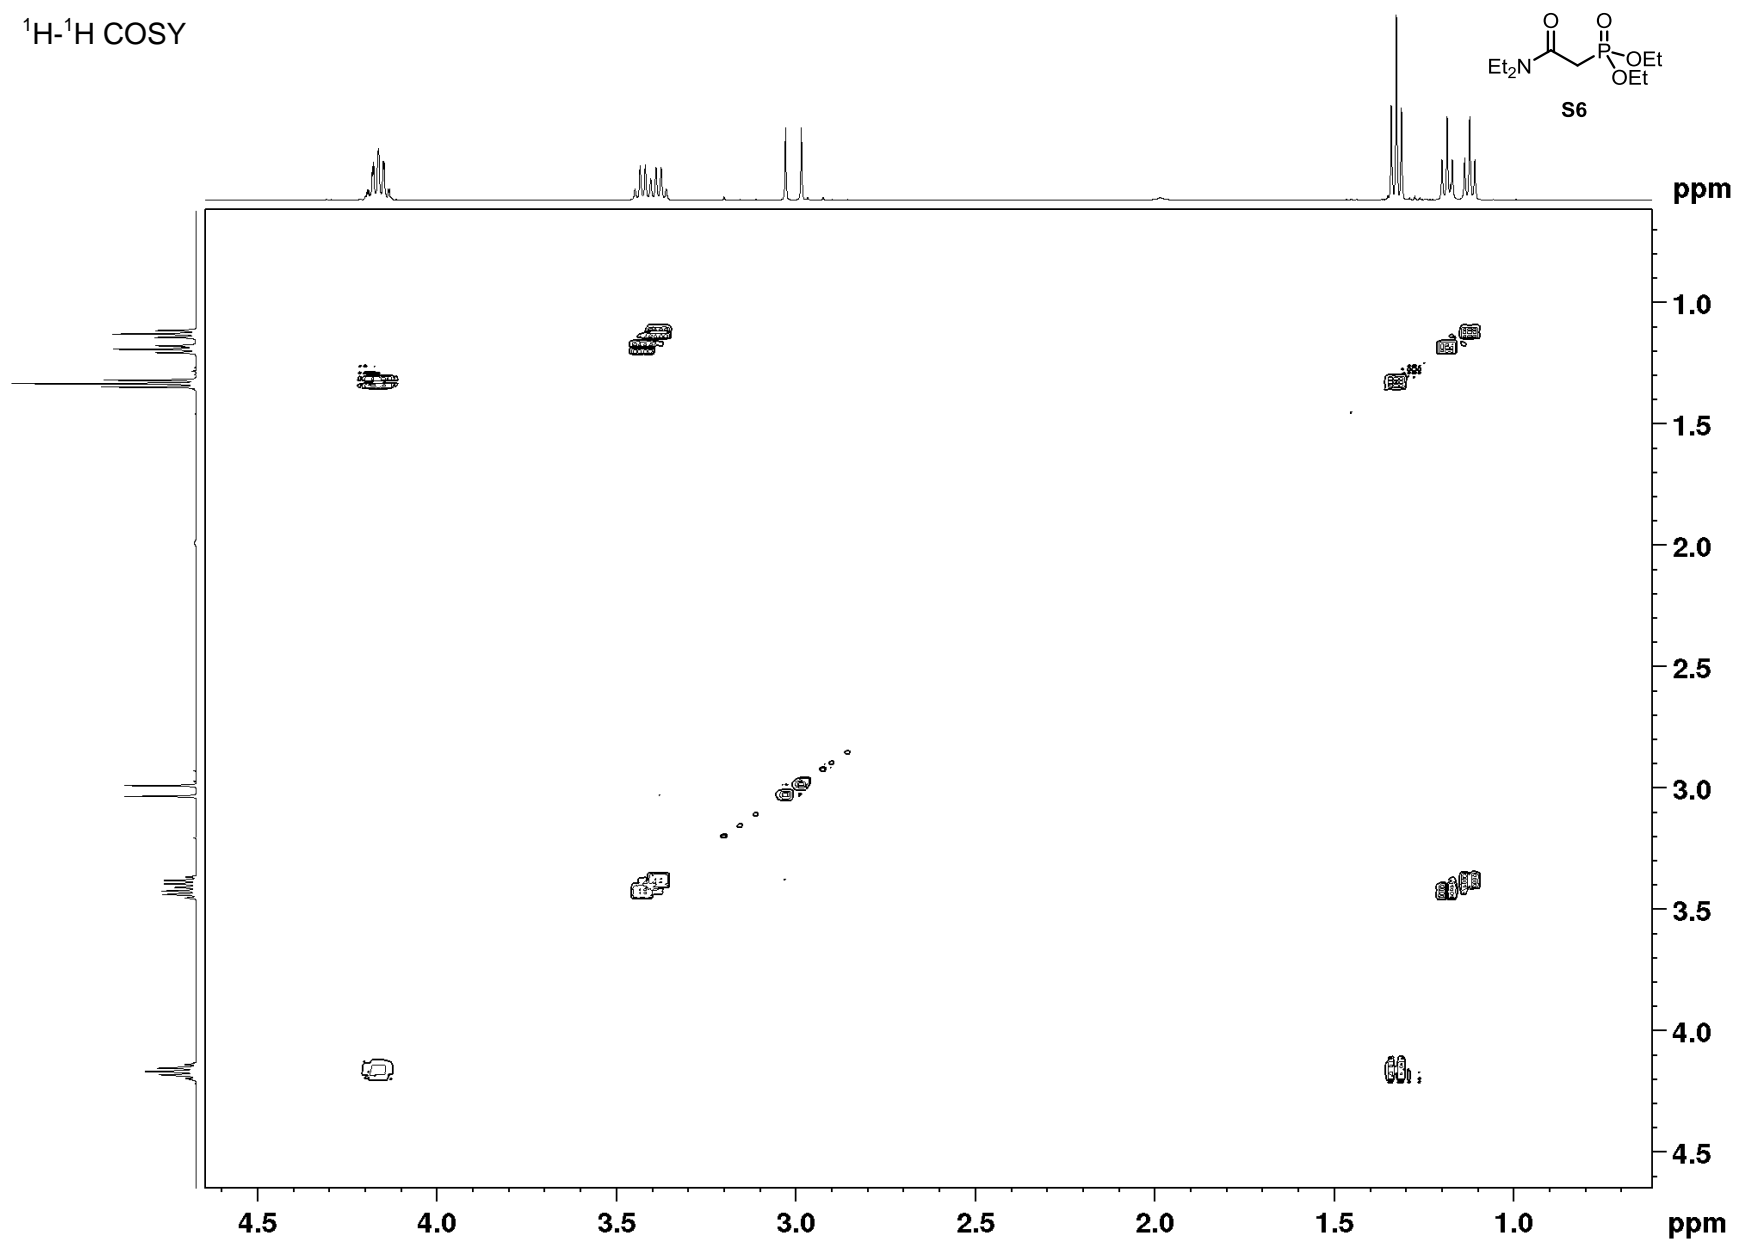

S535

$^1\text{H}$ - $^{13}\text{C}$  HMQC

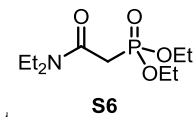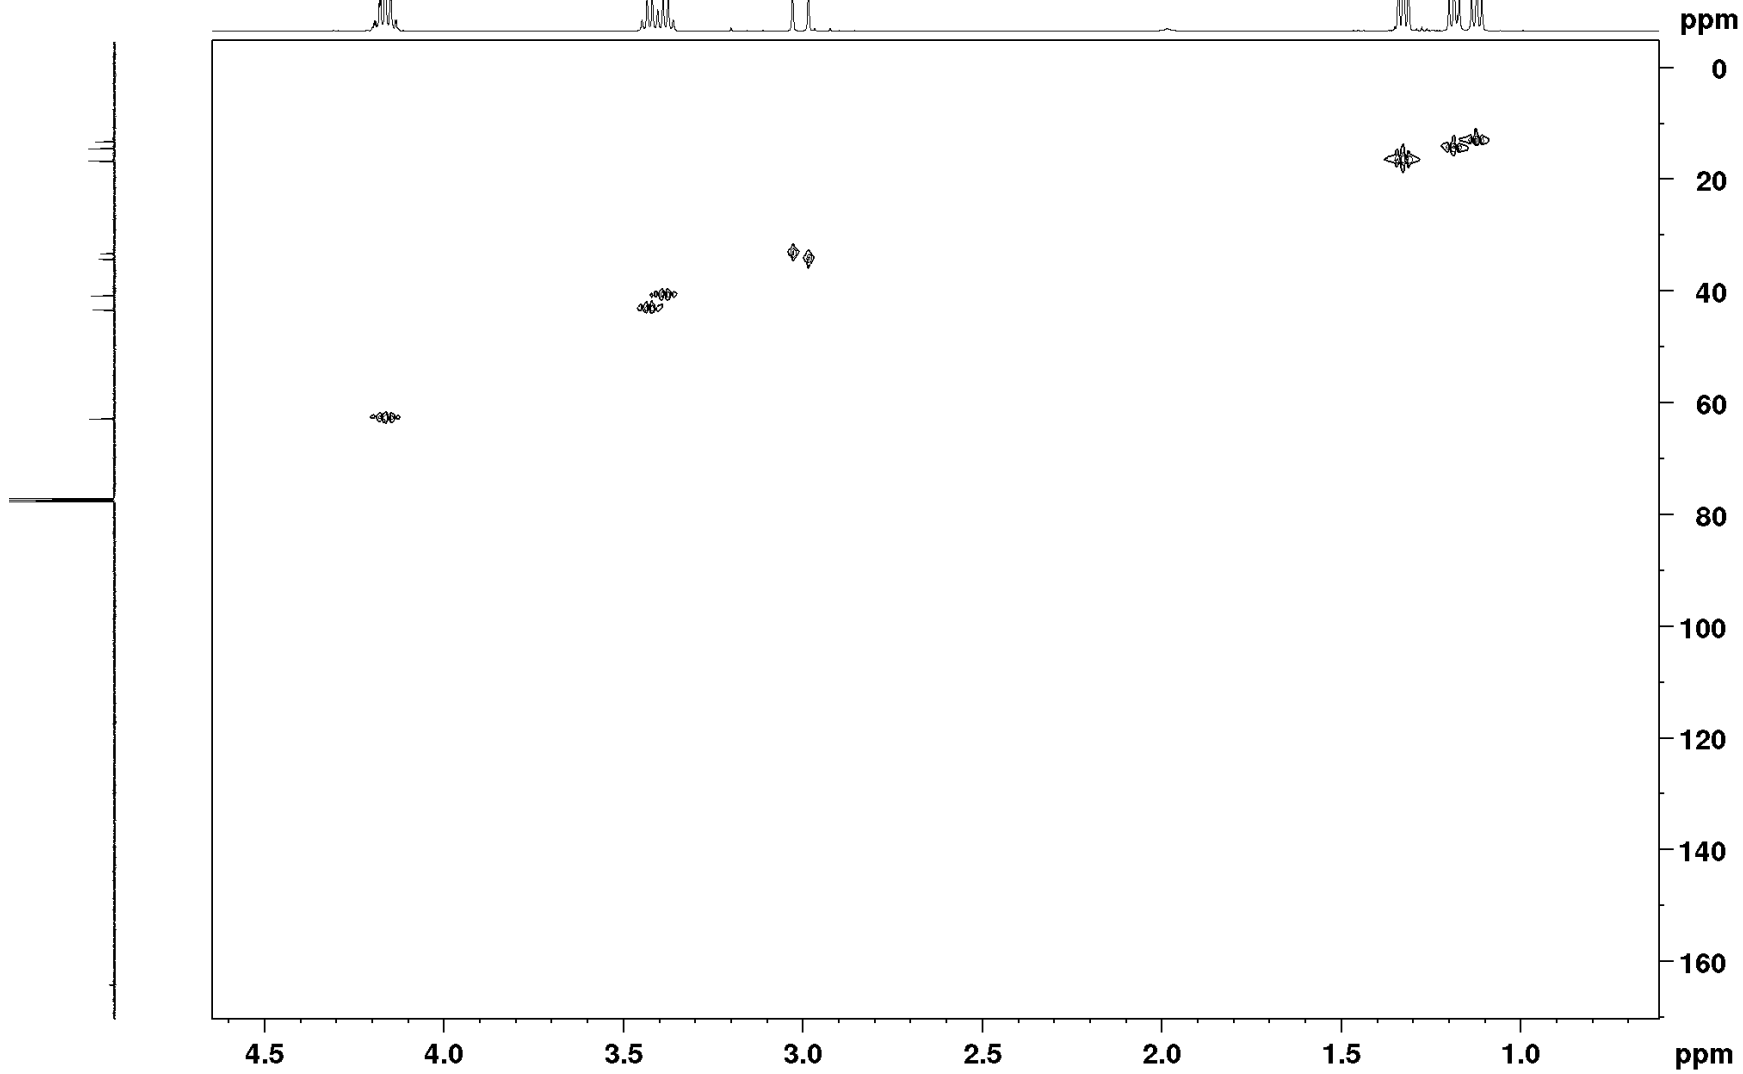

S536

$^1\text{H}$ - $^{13}\text{C}$  HMBC

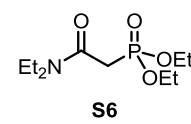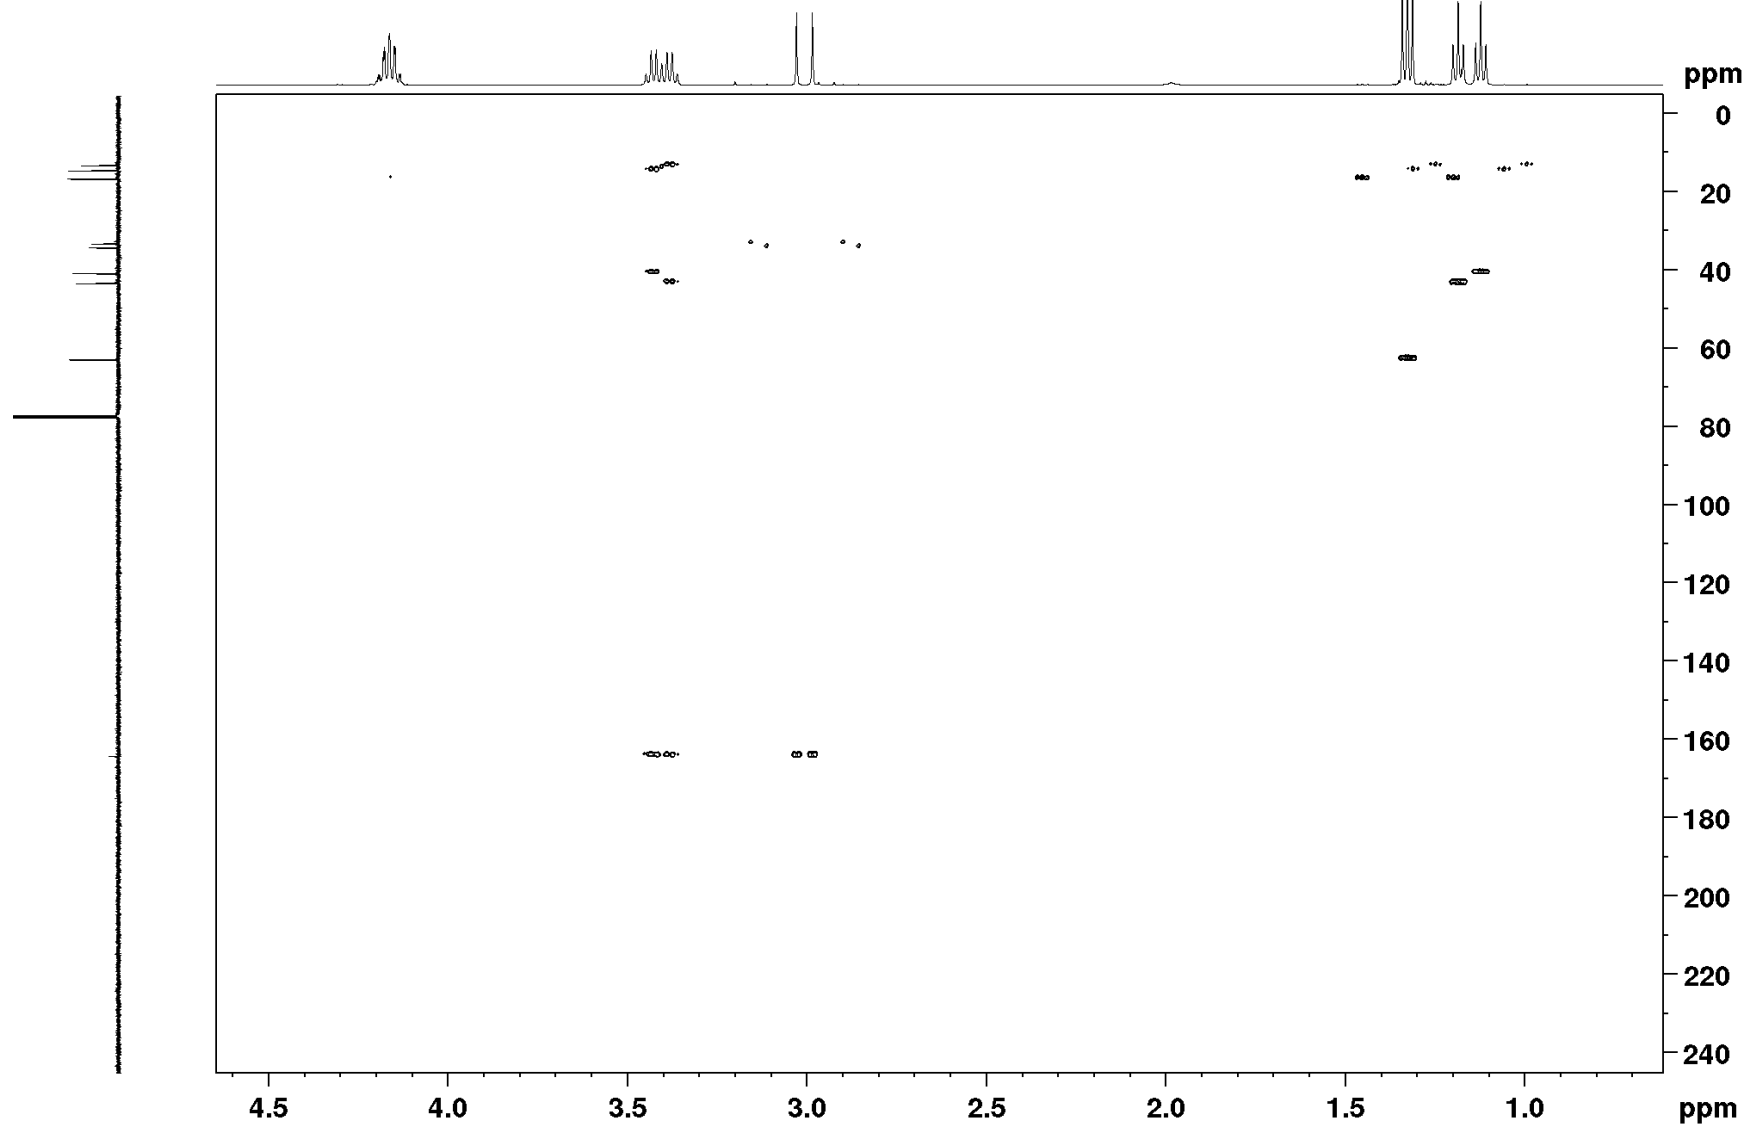

$^{31}\text{P}$  NMR

21.66  
21.62  
21.58  
21.54  
21.51  
21.47  
21.43  
21.40  
21.36  
21.32  
21.28

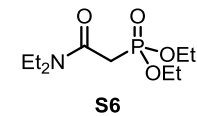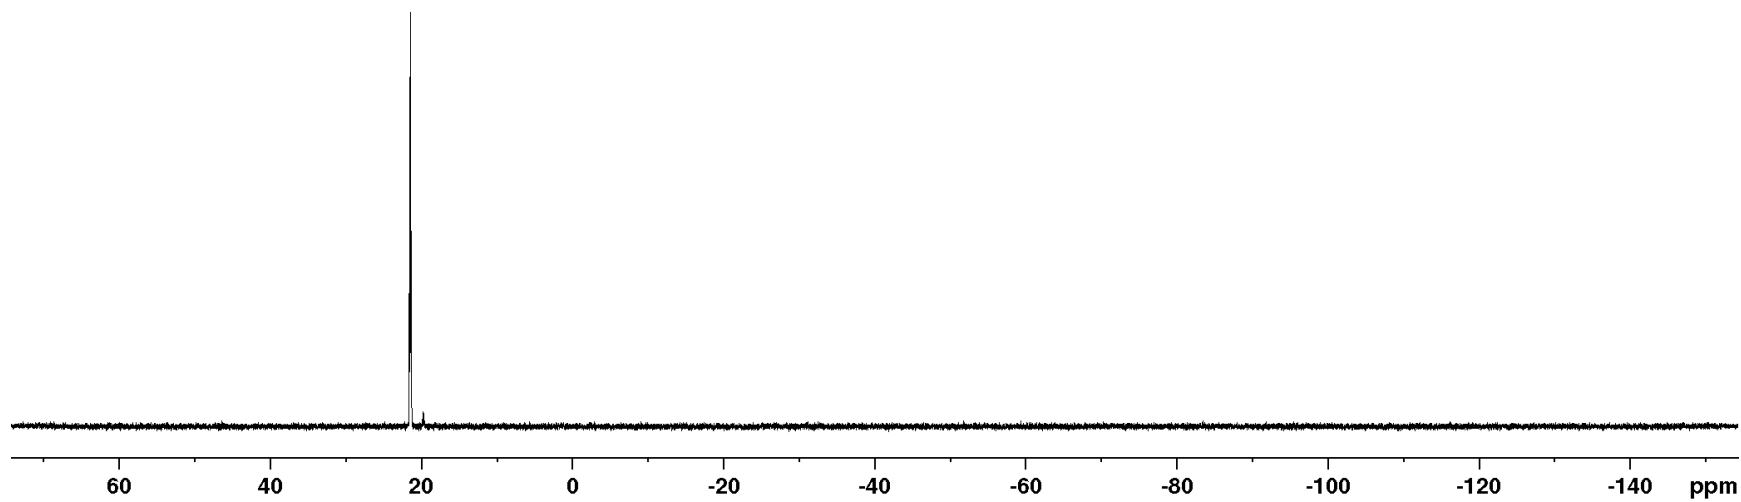

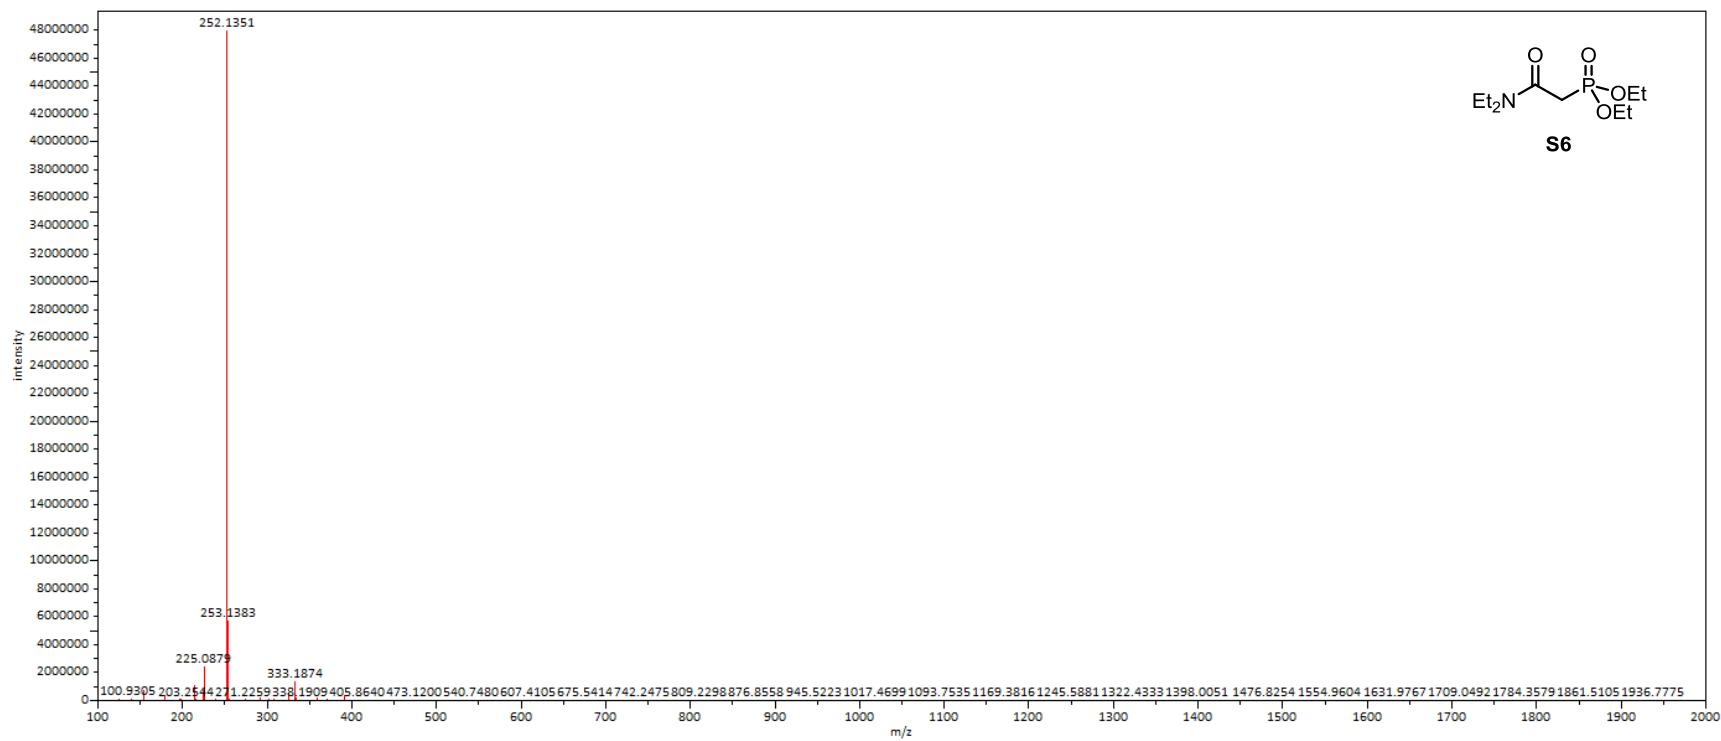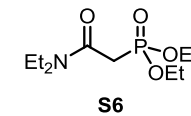

Supplement: c8cc09853k1.pdf [file c8cc09853k1.pdf]
